# Supplementary material for: Multi-Omics Approaches for Revealing the Epigenetic Regulation of Histone H3.1 during Spermatogonial Stem Cell Differentiation In Vitro
Source: MDPI journal article supplement (doi:10.3390/ijms24043314), 2023-02-07

Figure S2

A

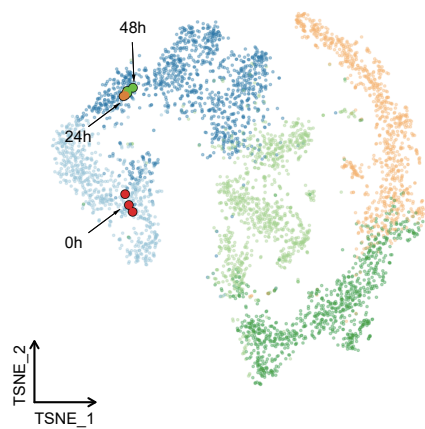

Ref: P15Clusters

- Undifferentiated\_Spermatogonia(727)
- Differentiating\_Spermatogonia\_1(1190)
- Differentiating\_Spermatogonia\_2(1030)
- Leptotene(907)
- Zygotene(938)

Query: Time

- 0h(3)
- 24h(3)
- 48h(3)

B

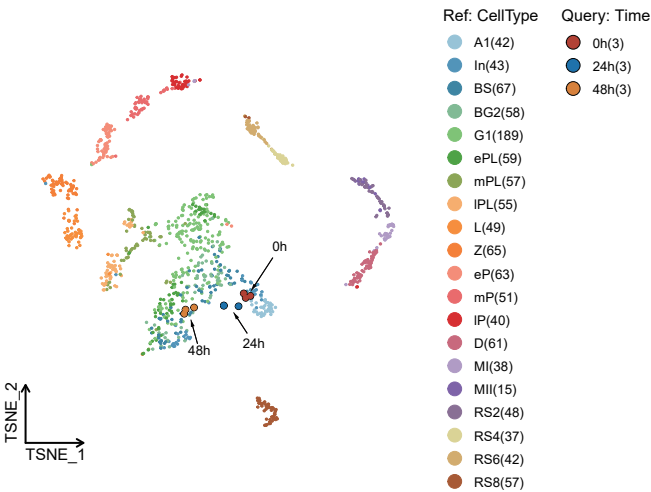

Supplement: s1 [file s1]
