# Supplementary material for: Multi-Omics Approaches for Revealing the Epigenetic Regulation of Histone H3.1 during Spermatogonial Stem Cell Differentiation In Vitro
Source: MDPI journal article supplement (doi:10.3390/ijms24043314), 2023-02-07

## Supplementary Figure

### **Multi-omics approaches for revealing the epigenetic regulation of histone H3.1 during spermatogonial stem cell differentiation in vitro**

Figure S1: Extracted ion chromatograms of histone post-translational modification peptides by PRM

(A) Representative extracted ion chromatograms of histone post-translational modification peptides from 0h, 24h, and 48h differentiated SSCs. Heavy peptide with BSA is used as a negative control.

Figure S1

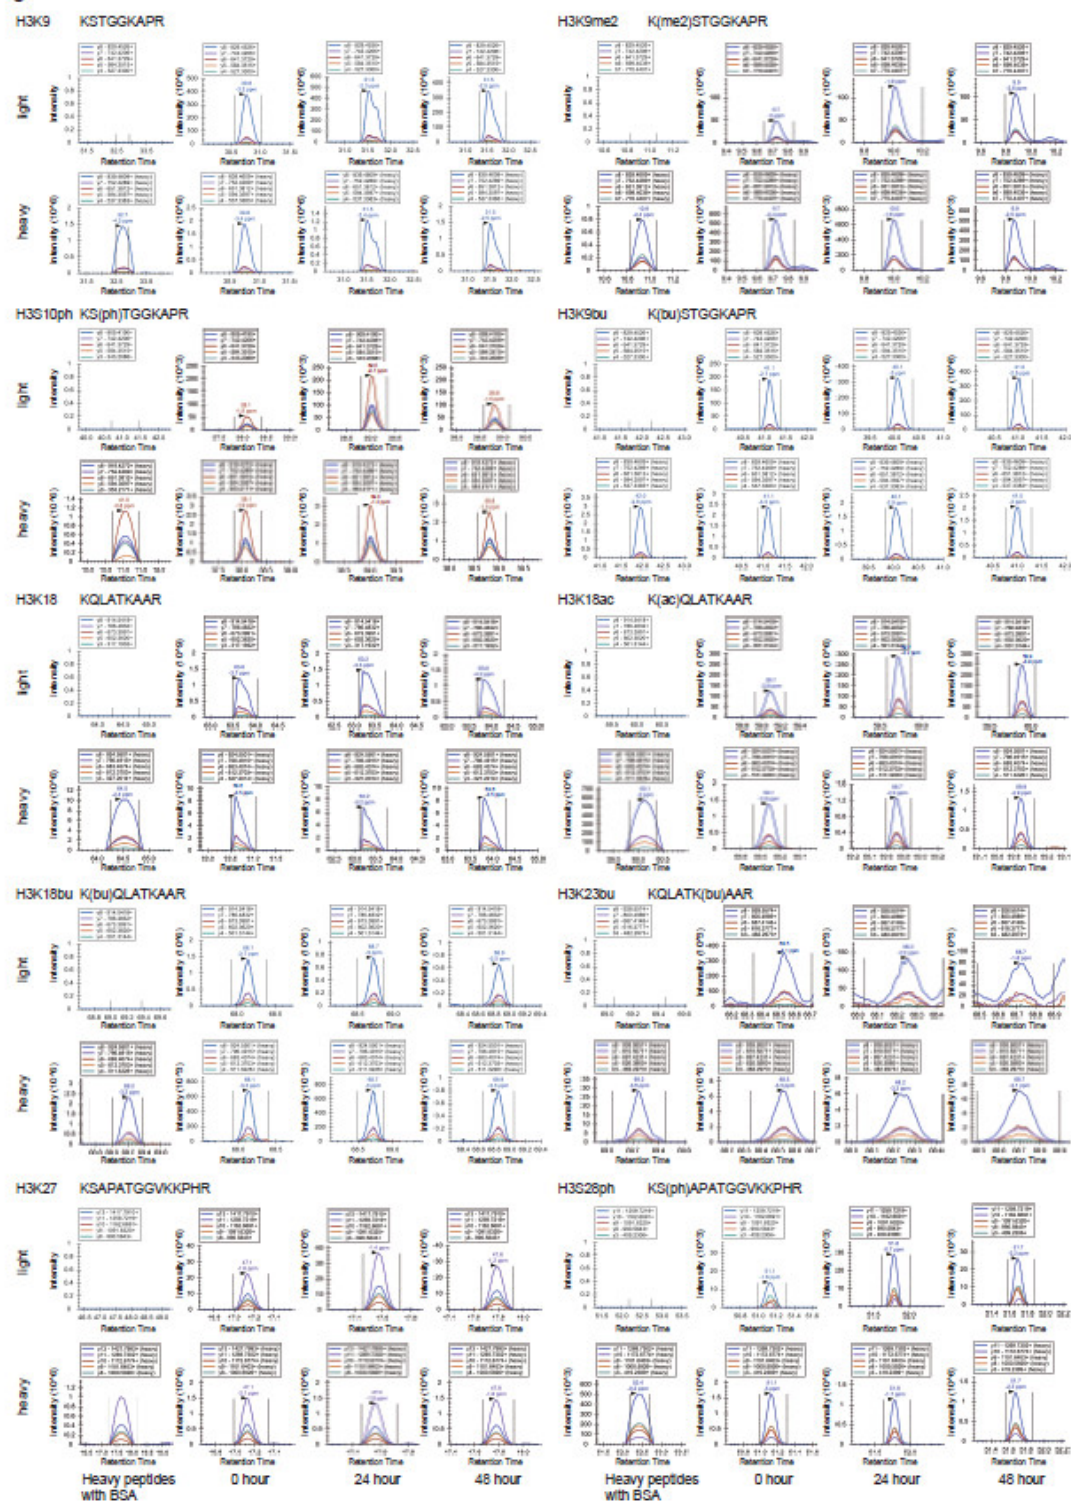

Figure S2: Differentiation trajectory of SSCs compared with another two published datasets.

Figure S2

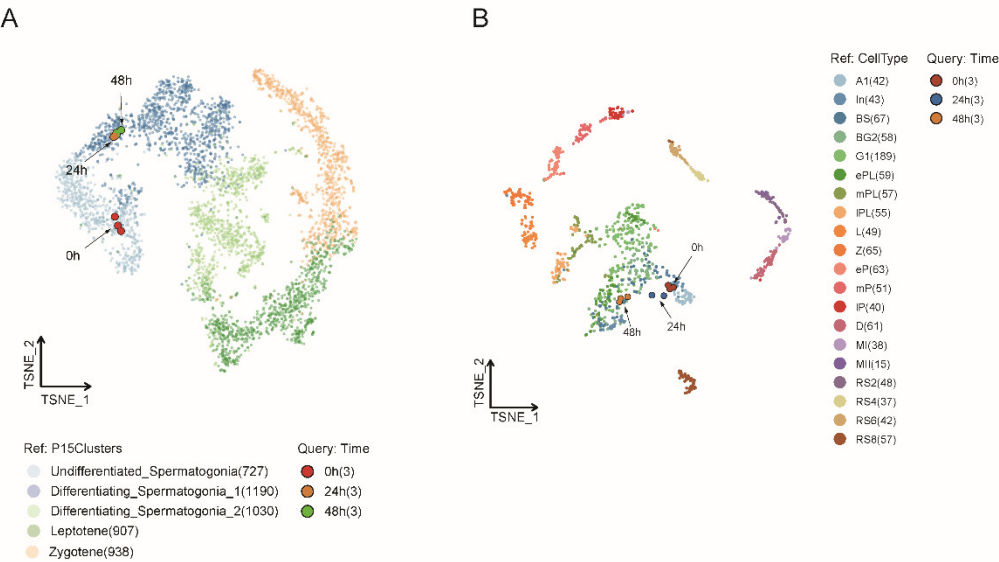

Supplement: s1 [file s1]
