# Supplementary material for: Multi-Omics Approaches for Revealing the Epigenetic Regulation of Histone H3.1 during Spermatogonial Stem Cell Differentiation In Vitro
Source: Int J Mol Sci. 2023 Feb 7;24(4):3314. doi: 10.3390/ijms24043314 (PMC9958608; doi:10.3390/ijms24043314)
Supplement: Supplementary file 1 [file ijms-24-03314-s001.zip]

Archive with 7 entries (7 files):
- Figure S1.pdf
- Figure S2.pdf
- Table S1.xlsx
- Table S2.xlsx
- Table S3.xls
- Table S4.xlsx
- Supplementary Figure.pdf
