# Supplementary material for: Multi-Omics Approaches for Revealing the Epigenetic Regulation of Histone H3.1 during Spermatogonial Stem Cell Differentiation In Vitro
Source: Int J Mol Sci. 2023 Feb 7;24(4):3314. doi: 10.3390/ijms24043314 (PMC9958608; doi:10.3390/ijms24043314)
Supplement: Supplementary file 1 [file ijms-24-03314-s001.zip › Table S1.xlsx]

## Sheet: 0h
Peptide	Protein	Replicate	Peptide Peak Found Ratio	Peptide Retention Time	Ratio To Standard	Quantification
ARTKQTAR	H3R2	SSC 0h rep1	1	9.59	0.1069	Normalized Area: 3.1292E+6
ARTKQTAR	H3R2	SSC 0h rep2	1	9.34	0.1096	Normalized Area: 3.3240E+6
ARTKQTAR	H3R2	SSC 0h rep3	1	9.26	0.1003	Normalized Area: 3.6003E+6
EIAQDFKTDLR	H3K79	SSC 0h rep1	1	82.93	0.5779	Normalized Area: 4.1114E+8
EIAQDFKTDLR	H3K79	SSC 0h rep2	1	82.71	0.5995	Normalized Area: 3.5362E+8
EIAQDFKTDLR	H3K79	SSC 0h rep3	1	82.7	0.5798	Normalized Area: 4.2415E+8
EIAQDFKTDLR	H3K79me1	SSC 0h rep1	1	86.29	0.0286	Normalized Area: 6.5165E+7
EIAQDFKTDLR	H3K79me1	SSC 0h rep2	1	86.11	0.0287	Normalized Area: 6.2329E+7
EIAQDFKTDLR	H3K79me1	SSC 0h rep3	1	86.1	0.0289	Normalized Area: 5.5570E+7
EIAQDFKTDLR	H3K79me2	SSC 0h rep1	1	64.57	0.2233	Normalized Area: 6.6409E+6
EIAQDFKTDLR	H3K79me2	SSC 0h rep2	1	64.51	0.2222	Normalized Area: 6.7082E+6
EIAQDFKTDLR	H3K79me2	SSC 0h rep3	1	64.53	0.2302	Normalized Area: 6.5620E+6
EIAQDFKTDLR	H3K79bu	SSC 0h rep1	1	86.03	13.1774	Normalized Area: 5.8938E+7
EIAQDFKTDLR	H3K79bu	SSC 0h rep2	1	85.92	20.3593	Normalized Area: 8.2644E+7
EIAQDFKTDLR	H3K79bu	SSC 0h rep3	1	85.96	22.6355	Normalized Area: 8.3180E+7
KLPFQR	H3K64	SSC 0h rep1	1	66.52	196.458	Normalized Area: 1.5196E+9
KLPFQR	H3K64	SSC 0h rep2	1	66.42	196.502	Normalized Area: 1.3908E+9
KLPFQR	H3K64	SSC 0h rep3	1	66.49	197.084	Normalized Area: 1.5672E+9
KLPFQR	H3K64fo	SSC 0h rep1	0.67	61.4	0.027	Normalized Area: 4.6972E+5
KLPFQR	H3K64fo	SSC 0h rep2	0.58	61.29	0.0265	Normalized Area: 4.0898E+5
KLPFQR	H3K64fo	SSC 0h rep3	0.58	61.36	0.0275	Normalized Area: 4.7413E+5
KQLATKAAR	H3K18	SSC 0h rep1	1	63.63	163.407	Normalized Area: 3.5567E+10
KQLATKAAR	H3K18	SSC 0h rep2	1	63.3	168.461	Normalized Area: 3.8536E+10
KQLATKAAR	H3K18	SSC 0h rep3	1	63.27	171.858	Normalized Area: 3.6738E+10
KQLATKAAR	H3K18me1	SSC 0h rep1	0.75	69.85	1.7476	Normalized Area: 1.4317E+8
KQLATKAAR	H3K18me1	SSC 0h rep2	0.75	69.5	1.75	Normalized Area: 1.3365E+8
KQLATKAAR	H3K18me1	SSC 0h rep3	0.75	69.52	1.7615	Normalized Area: 1.4207E+8
KQLATKAAR	H3K18me2	SSC 0h rep1	1	40.44	0.0093	Normalized Area: 2.5304E+6
KQLATKAAR	H3K18me2	SSC 0h rep2	1	39.95	0.0093	Normalized Area: 2.6032E+6
KQLATKAAR	H3K18me2	SSC 0h rep3	1	39.93	0.0094	Normalized Area: 2.3401E+6
KQLATKAAR	H3K18ub	SSC 0h rep1	1	60.53	0.2241	Normalized Area: 2.8384E+6
KQLATKAAR	H3K18ub	SSC 0h rep2	1	60.13	0.2153	Normalized Area: 2.7966E+6
KQLATKAAR	H3K18ub	SSC 0h rep3	1	60.08	0.22	Normalized Area: 3.1981E+6
KQLATKAAR	H3K23ac	SSC 0h rep1	1	59.93	180.858	Normalized Area: 9.5899E+9
KQLATKAAR	H3K23ac	SSC 0h rep2	1	59.54	181.181	Normalized Area: 9.8143E+9
KQLATKAAR	H3K23ac	SSC 0h rep3	1	59.54	178.741	Normalized Area: 1.1330E+10
KQLATKAAR	H3K23bu	SSC 0h rep1	0.83	68.54	0.0575	Normalized Area: 5.6002E+6
KQLATKAAR	H3K23bu	SSC 0h rep2	0.71	68.2	0.058	Normalized Area: 5.0230E+6
KQLATKAAR	H3K23bu	SSC 0h rep3	0.75	68.22	0.0599	Normalized Area: 5.8325E+6
KQLATKAAR	H3K23fo	SSC 0h rep1	1	58.55	0.0857	Normalized Area: 7.1012E+6
KQLATKAAR	H3K23fo	SSC 0h rep2	1	58.18	0.0879	Normalized Area: 7.3448E+6
KQLATKAAR	H3K23fo	SSC 0h rep3	1	58.17	0.0852	Normalized Area: 8.7019E+6
KQLATKAAR	H3K18ac	SSC 0h rep1	1	59.09	88.9889	Normalized Area: 1.8496E+9
KQLATKAAR	H3K18ac	SSC 0h rep2	1	59	92.1776	Normalized Area: 1.7498E+9
KQLATKAAR	H3K18ac	SSC 0h rep3	1	59.05	97.8078	Normalized Area: 1.8312E+9
KQLATKAAR	H3K18bu	SSC 0h rep1	1	68.15	1.7684	Normalized Area: 2.1581E+7
KQLATKAAR	H3K18bu	SSC 0h rep2	1	68.07	1.8443	Normalized Area: 2.4461E+7
KQLATKAAR	H3K18bu	SSC 0h rep3	1	68.13	1.9435	Normalized Area: 2.2304E+7
KQLATKAAR	H3K18fo	SSC 0h rep1	1	57.46	0.5545	Normalized Area: 4.6521E+6
KQLATKAAR	H3K18fo	SSC 0h rep2	1	57.35	0.5457	Normalized Area: 4.3109E+6
KQLATKAAR	H3K18fo	SSC 0h rep3	1	57.4	0.5362	Normalized Area: 4.6450E+6
KSAPATGGVKKPHR	H3K27me3	SSC 0h rep1	1	30.51	0.0256	Normalized Area: 9.3269E+5
KSAPATGGVKKPHR	H3K27me3	SSC 0h rep2	1	30.07	0.0253	Normalized Area: 9.6089E+5
KSAPATGGVKKPHR	H3K27me3	SSC 0h rep3	1	29.92	0.0247	Normalized Area: 6.6261E+5
KSAPATGGVKKPHR	H3K27ac	SSC 0h rep1	1	43.98	1.176	Normalized Area: 1.5067E+7
KSAPATGGVKKPHR	H3K27ac	SSC 0h rep2	1	43.37	1.0915	Normalized Area: 1.5583E+7
KSAPATGGVKKPHR	H3K27ac	SSC 0h rep3	1	43.37	1.127	Normalized Area: 1.6251E+7
KSAPATGGVKKPHR	H3K27bu	SSC 0h rep1	1	53.45	478.155	Normalized Area: 7.0771E+8
KSAPATGGVKKPHR	H3K27bu	SSC 0h rep2	1	53.05	479.534	Normalized Area: 7.4159E+8
KSAPATGGVKKPHR	H3K27bu	SSC 0h rep3	1	53	472.81	Normalized Area: 9.1035E+8
KSAPATGGVKKPHR	H3K36me2	SSC 0h rep1	1	36.02	3.8132	Normalized Area: 8.5878E+7
KSAPATGGVKKPHR	H3K36me2	SSC 0h rep2	1	35.55	3.8177	Normalized Area: 8.5480E+7
KSAPATGGVKKPHR	H3K36me2	SSC 0h rep3	1	35.37	3.7829	Normalized Area: 6.7797E+7
KSAPATGGVKKPHR	H3K36me3	SSC 0h rep1	0.7	35.81	1.4139	Normalized Area: 1.2304E+7
KSAPATGGVKKPHR	H3K36me3	SSC 0h rep2	0.66	35.33	1.4677	Normalized Area: 1.2753E+7
KSAPATGGVKKPHR	H3K36me3	SSC 0h rep3	0.61	35.23	1.3285	Normalized Area: 9.2904E+6
KSAPATGGVKKPHR	H3K37ac	SSC 0h rep1	0.92	44.96	0.1017	Normalized Area: 6.0734E+5
KSAPATGGVKKPHR	H3K37ac	SSC 0h rep2	1	44.37	0.0975	Normalized Area: 6.0464E+5
KSAPATGGVKKPHR	H3K37ac	SSC 0h rep3	1	44.34	0.1107	Normalized Area: 7.0391E+5
KSAPATGGVKKPHR	H3K37me1	SSC 0h rep1	0.84	52.13	3.2885	Normalized Area: 4.4412E+8
KSAPATGGVKKPHR	H3K37me1	SSC 0h rep2	0.84	51.62	3.3358	Normalized Area: 4.4416E+8
KSAPATGGVKKPHR	H3K37me1	SSC 0h rep3	0.8	51.66	3.2603	Normalized Area: 5.7082E+8
KSAPATGGVKKPHR	H3K27	SSC 0h rep1	1	47.13	14.9272	Normalized Area: 3.9365E+8
KSAPATGGVKKPHR	H3K27	SSC 0h rep2	1	47.09	15.3669	Normalized Area: 4.8786E+8
KSAPATGGVKKPHR	H3K27	SSC 0h rep3	1	47.1	14.7723	Normalized Area: 4.8259E+8
KSAPATGGVKKPHR	H3K27me1	SSC 0h rep1	1	52.83	2.3745	Normalized Area: 6.7584E+8
KSAPATGGVKKPHR	H3K27me1	SSC 0h rep2	1	52.77	2.3999	Normalized Area: 7.3209E+8
KSAPATGGVKKPHR	H3K27me1	SSC 0h rep3	1	52.79	2.4481	Normalized Area: 7.3320E+8
KSAPATGGVKKPHR	H3K27me2	SSC 0h rep1	1	29.91	1.3611	Normalized Area: 3.9142E+7
KSAPATGGVKKPHR	H3K27me2	SSC 0h rep2	1	29.9	1.3251	Normalized Area: 3.8078E+7
KSAPATGGVKKPHR	H3K27me2	SSC 0h rep3	1	29.79	1.3772	Normalized Area: 4.0443E+7
KSAPATGGVKKPHR	H3S28ph	SSC 0h rep1	0.83	51.13	0.0065	Normalized Area: 1.7639E+5
KSAPATGGVKKPHR	H3S28ph	SSC 0h rep2	0.83	50.98	0.0049	Normalized Area: 1.3577E+5
KSAPATGGVKKPHR	H3S28ph	SSC 0h rep3	0.83	51.08	0.0062	Normalized Area: 1.7135E+5
KSAPATGGVKKPHR	H3K36me1	SSC 0h rep1	1	51.5	3.6994	Normalized Area: 3.9658E+8
KSAPATGGVKKPHR	H3K36me1	SSC 0h rep2	1	51.35	3.7351	Normalized Area: 4.0039E+8
KSAPATGGVKKPHR	H3K36me1	SSC 0h rep3	1	51.45	3.8083	Normalized Area: 4.1065E+8
KSAPATGGVKKPHR	H3K36ac	SSC 0h rep1	1	44.12	0.0091	Normalized Area: 4.4367E+5
KSAPATGGVKKPHR	H3K36ac	SSC 0h rep2	1	44.05	0.0093	Normalized Area: 4.6279E+5
KSAPATGGVKKPHR	H3K36ac	SSC 0h rep3	1	44.12	0.0093	Normalized Area: 4.6106E+5
KSTGGKAPR	H3K9bu	SSC 0h rep1	1	41.1	77.7044	Normalized Area: 2.6414E+9
KSTGGKAPR	H3K9bu	SSC 0h rep2	1	40.61	82.2467	Normalized Area: 2.7218E+9
KSTGGKAPR	H3K9bu	SSC 0h rep3	1	40.45	80.6992	Normalized Area: 2.7866E+9
KSTGGKAPR	H3K14ac	SSC 0h rep1	1	26.57	43.8968	Normalized Area: 9.1565E+8
KSTGGKAPR	H3K14ac	SSC 0h rep2	1	25.95	45.3336	Normalized Area: 8.4961E+8
KSTGGKAPR	H3K14ac	SSC 0h rep3	1	25.73	46.057	Normalized Area: 8.4112E+8
KSTGGKAPR	H3K14me1	SSC 0h rep1	0.58	39.97	0.2096	Normalized Area: 7.7966E+6
KSTGGKAPR	H3K14me1	SSC 0h rep2	0.58	39.45	0.2096	Normalized Area: 6.2917E+6
KSTGGKAPR	H3K14me1	SSC 0h rep3	0.58	39.33	0.2217	Normalized Area: 7.7085E+6
KSTGGKAPR	H3K9	SSC 0h rep1	0.71	30.75	201.833	Normalized Area: 5.5651E+9
KSTGGKAPR	H3K9	SSC 0h rep2	0.71	30.7	196.934	Normalized Area: 5.6462E+9
KSTGGKAPR	H3K9	SSC 0h rep3	0.75	30.58	196.508	Normalized Area: 5.7087E+9
KSTGGKAPR	H3K9ac	SSC 0h rep1	1	25.23	1.4381	Normalized Area: 1.1487E+7
KSTGGKAPR	H3K9ac	SSC 0h rep2	1	25.15	1.4599	Normalized Area: 1.4013E+7
KSTGGKAPR	H3K9ac	SSC 0h rep3	1	24.99	1.4464	Normalized Area: 1.3233E+7
KSTGGKAPR	H3S10ph	SSC 0h rep1	1	38.08	0.0185	Normalized Area: 1.6763E+6
KSTGGKAPR	H3S10ph	SSC 0h rep2	1	37.99	0.0192	Normalized Area: 1.7315E+6
KSTGGKAPR	H3S10ph	SSC 0h rep3	1	37.94	0.0188	Normalized Area: 1.6688E+6
KSTGGKAPR	H3K9me2	SSC 0h rep1	1	9.72	87.7568	Normalized Area: 4.6165E+8
KSTGGKAPR	H3K9me2	SSC 0h rep2	1	9.61	89.8693	Normalized Area: 5.1009E+8
KSTGGKAPR	H3K9me2	SSC 0h rep3	1	9.56	87.1949	Normalized Area: 5.3924E+8
KSTGGKAPR	H3K9me3	SSC 0h rep1	1	9.48	23.1122	Normalized Area: 3.9564E+8
KSTGGKAPR	H3K9me3	SSC 0h rep2	1	9.39	23.5699	Normalized Area: 4.2761E+8
KSTGGKAPR	H3K9me3	SSC 0h rep3	1	9.24	23.244	Normalized Area: 4.2397E+8
TKQTAR	H3K4ac	SSC 0h rep1	0.7	9.32	0.0216	Normalized Area: 3.7170E+5
TKQTAR	H3K4ac	SSC 0h rep2	0.7	9.08	0.0206	Normalized Area: 3.5638E+5
TKQTAR	H3K4ac	SSC 0h rep3	0.6	8.99	0.0205	Normalized Area: 3.7573E+5
TKQTAR	H3K4	SSC 0h rep1	0.7	11.83	7.2569	Normalized Area: 1.5211E+9
TKQTAR	H3K4	SSC 0h rep2	0.7	11.67	7.44	Normalized Area: 1.6397E+9
TKQTAR	H3K4	SSC 0h rep3	0.6	11.62	7.2789	Normalized Area: 1.6081E+9
TKQTAR	H3K4me1	SSC 0h rep1	0.7	20.7	5.8594	Normalized Area: 1.5637E+8
TKQTAR	H3K4me1	SSC 0h rep2	0.7	20.54	5.7256	Normalized Area: 1.4093E+8
TKQTAR	H3K4me1	SSC 0h rep3	0.6	20.41	5.7206	Normalized Area: 1.5545E+8
VTIMPKDIQLAR	H3K122me1	SSC 0h rep1	0.5	88.04	0.0481	Normalized Area: 9.3760E+5
VTIMPKDIQLAR	H3K122me1	SSC 0h rep2	0.5	87.88	0.0447	Normalized Area: 9.0756E+5
VTIMPKDIQLAR	H3K122me1	SSC 0h rep3	0.56	87.87	0.0439	Normalized Area: 8.4442E+5
VTIMPKDIQLAR	H3K122	SSC 0h rep1	1	85.67	78.5889	Normalized Area: 1.2786E+9
VTIMPKDIQLAR	H3K122	SSC 0h rep2	1	85.57	82.7821	Normalized Area: 1.5126E+9
VTIMPKDIQLAR	H3K122	SSC 0h rep3	1	85.61	83.2532	Normalized Area: 1.5152E+9
VTIMPKDIQLAR	H3K122bu	SSC 0h rep1	0.83	87.79	0.0546	Normalized Area: 1.0453E+6
VTIMPKDIQLAR	H3K122bu	SSC 0h rep2	0.83	87.7	0.0498	Normalized Area: 1.2099E+6
VTIMPKDIQLAR	H3K122bu	SSC 0h rep3	0.83	87.76	0.0581	Normalized Area: 1.2972E+6
YQKSTELLIR	H3K56	SSC 0h rep1	1	76.45	0.304	Normalized Area: 2.0021E+8
YQKSTELLIR	H3K56	SSC 0h rep2	1	76.12	0.3138	Normalized Area: 2.0318E+8
YQKSTELLIR	H3K56	SSC 0h rep3	1	76.09	0.314	Normalized Area: 2.0157E+8
YRPGTVALR	H3Y41	SSC 0h rep1	1	42.17	92.1975	Normalized Area: 2.1163E+9
YRPGTVALR	H3Y41	SSC 0h rep2	1	42.13	93.6343	Normalized Area: 2.1648E+9
YRPGTVALR	H3Y41	SSC 0h rep3	1	42.18	94.0143	Normalized Area: 2.2025E+9

## Sheet: 24h
Peptide	Protein	Replicate	Peptide Peak Found Ratio	Peptide Retention Time	Ratio To Standard	Quantification
ARTKQTAR	H3R2	SSC 24h rep1	1	9.03	0.2068	Normalized Area: 6.6668E+6
ARTKQTAR	H3R2	SSC 24h rep2	1	9.14	0.2126	Normalized Area: 6.8535E+6
ARTKQTAR	H3R2	SSC 24h rep3	1	9.23	0.2078	Normalized Area: 7.3825E+6
EIAQDFKTDLR	H3K79	SSC 24h rep1	1	82.74	1.4294	Normalized Area: 7.9394E+8
EIAQDFKTDLR	H3K79	SSC 24h rep2	1	82.7	1.4849	Normalized Area: 8.5707E+8
EIAQDFKTDLR	H3K79	SSC 24h rep3	1	82.86	1.5101	Normalized Area: 9.2435E+8
EIAQDFKTDLR	H3K79me1	SSC 24h rep1	1	86.18	0.0681	Normalized Area: 1.1212E+8
EIAQDFKTDLR	H3K79me1	SSC 24h rep2	1	86.22	0.0686	Normalized Area: 1.4339E+8
EIAQDFKTDLR	H3K79me1	SSC 24h rep3	1	86.29	0.0669	Normalized Area: 1.3635E+8
EIAQDFKTDLR	H3K79me2	SSC 24h rep1	1	65.18	0.4581	Normalized Area: 1.2072E+7
EIAQDFKTDLR	H3K79me2	SSC 24h rep2	1	65.14	0.4744	Normalized Area: 1.2419E+7
EIAQDFKTDLR	H3K79me2	SSC 24h rep3	1	65.22	0.4429	Normalized Area: 1.1781E+7
EIAQDFKTDLR	H3K79bu	SSC 24h rep1	1	86.44	39.7914	Normalized Area: 1.0696E+8
EIAQDFKTDLR	H3K79bu	SSC 24h rep2	1	86.42	50.2917	Normalized Area: 1.4845E+8
EIAQDFKTDLR	H3K79bu	SSC 24h rep3	1	86.41	39.3913	Normalized Area: 1.3879E+8
KLPFQR	H3K64	SSC 24h rep1	1	67.09	374.386	Normalized Area: 2.2757E+9
KLPFQR	H3K64	SSC 24h rep2	1	67.09	386.918	Normalized Area: 2.5043E+9
KLPFQR	H3K64	SSC 24h rep3	1	67.1	387.646	Normalized Area: 2.7358E+9
KLPFQR	H3K64fo	SSC 24h rep1	0.58	61.96	0.0476	Normalized Area: 6.6003E+5
KLPFQR	H3K64fo	SSC 24h rep2	0.58	61.97	0.051	Normalized Area: 7.0547E+5
KLPFQR	H3K64fo	SSC 24h rep3	0.58	61.98	0.0514	Normalized Area: 7.1257E+5
KQLATKAAR	H3K18	SSC 24h rep1	1	63.19	272.769	Normalized Area: 5.3695E+10
KQLATKAAR	H3K18	SSC 24h rep2	1	63.37	272.918	Normalized Area: 5.5784E+10
KQLATKAAR	H3K18	SSC 24h rep3	1	63.46	274.987	Normalized Area: 5.3975E+10
KQLATKAAR	H3K18me1	SSC 24h rep1	0.75	69.54	3.2359	Normalized Area: 2.1903E+8
KQLATKAAR	H3K18me1	SSC 24h rep2	0.67	69.64	3.2629	Normalized Area: 2.3279E+8
KQLATKAAR	H3K18me1	SSC 24h rep3	0.75	69.76	3.3081	Normalized Area: 2.4027E+8
KQLATKAAR	H3K18me2	SSC 24h rep1	1	39.18	0.0157	Normalized Area: 4.3492E+6
KQLATKAAR	H3K18me2	SSC 24h rep2	1	39.71	0.0157	Normalized Area: 4.3463E+6
KQLATKAAR	H3K18me2	SSC 24h rep3	1	39.8	0.017	Normalized Area: 4.7069E+6
KQLATKAAR	H3K18ub	SSC 24h rep1	1	60.04	0.3872	Normalized Area: 3.3176E+6
KQLATKAAR	H3K18ub	SSC 24h rep2	1	60.23	0.3408	Normalized Area: 3.6131E+6
KQLATKAAR	H3K18ub	SSC 24h rep3	1	60.33	0.3481	Normalized Area: 3.3160E+6
KQLATKAAR	H3K23ac	SSC 24h rep1	1	59.52	333.969	Normalized Area: 1.3378E+10
KQLATKAAR	H3K23ac	SSC 24h rep2	1	59.71	286.179	Normalized Area: 1.4302E+10
KQLATKAAR	H3K23ac	SSC 24h rep3	1	59.82	329.551	Normalized Area: 1.3629E+10
KQLATKAAR	H3K23bu	SSC 24h rep1	0.75	68.24	0.0188	Normalized Area: 1.8072E+6
KQLATKAAR	H3K23bu	SSC 24h rep2	0.75	68.34	0.0214	Normalized Area: 2.0543E+6
KQLATKAAR	H3K23bu	SSC 24h rep3	0.75	68.45	0.019	Normalized Area: 1.9242E+6
KQLATKAAR	H3K23fo	SSC 24h rep1	1	57.99	0.1279	Normalized Area: 9.6177E+6
KQLATKAAR	H3K23fo	SSC 24h rep2	1	58.2	0.1305	Normalized Area: 1.0586E+7
KQLATKAAR	H3K23fo	SSC 24h rep3	1	58.32	0.1308	Normalized Area: 9.5641E+6
KQLATKAAR	H3K18ac	SSC 24h rep1	1	59.72	236.507	Normalized Area: 4.2659E+9
KQLATKAAR	H3K18ac	SSC 24h rep2	1	59.78	239.272	Normalized Area: 4.1911E+9
KQLATKAAR	H3K18ac	SSC 24h rep3	1	59.78	232.822	Normalized Area: 4.4119E+9
KQLATKAAR	H3K18bu	SSC 24h rep1	1	68.72	1.0202	Normalized Area: 1.1420E+7
KQLATKAAR	H3K18bu	SSC 24h rep2	1	68.75	0.9677	Normalized Area: 1.1877E+7
KQLATKAAR	H3K18bu	SSC 24h rep3	1	68.78	1.014	Normalized Area: 1.3494E+7
KQLATKAAR	H3K18fo	SSC 24h rep1	1	58.05	0.8441	Normalized Area: 6.2103E+6
KQLATKAAR	H3K18fo	SSC 24h rep2	1	58.04	0.8059	Normalized Area: 5.9679E+6
KQLATKAAR	H3K18fo	SSC 24h rep3	1	58.06	0.8	Normalized Area: 5.9962E+6
KSAPATGGVKKPHR	H3K27me3	SSC 24h rep1	1	29.18	0.0424	Normalized Area: 1.6379E+6
KSAPATGGVKKPHR	H3K27me3	SSC 24h rep2	1	29.88	0.0428	Normalized Area: 1.5005E+6
KSAPATGGVKKPHR	H3K27me3	SSC 24h rep3	1	29.98	0.0407	Normalized Area: 1.5679E+6
KSAPATGGVKKPHR	H3K27ac	SSC 24h rep1	1	42.93	2.7602	Normalized Area: 2.8449E+7
KSAPATGGVKKPHR	H3K27ac	SSC 24h rep2	1	43.24	2.6019	Normalized Area: 2.8951E+7
KSAPATGGVKKPHR	H3K27ac	SSC 24h rep3	1	43.34	2.6875	Normalized Area: 2.7498E+7
KSAPATGGVKKPHR	H3K27bu	SSC 24h rep1	1	52.75	925.565	Normalized Area: 1.0790E+9
KSAPATGGVKKPHR	H3K27bu	SSC 24h rep2	1	52.86	928.137	Normalized Area: 1.0770E+9
KSAPATGGVKKPHR	H3K27bu	SSC 24h rep3	1	53.08	912.634	Normalized Area: 1.0690E+9
KSAPATGGVKKPHR	H3K36me2	SSC 24h rep1	1	34.91	6.6978	Normalized Area: 1.8101E+8
KSAPATGGVKKPHR	H3K36me2	SSC 24h rep2	1	35.4	6.4326	Normalized Area: 1.5230E+8
KSAPATGGVKKPHR	H3K36me2	SSC 24h rep3	1	35.32	6.4607	Normalized Area: 1.5695E+8
KSAPATGGVKKPHR	H3K36me3	SSC 24h rep1	0.7	34.7	2.3348	Normalized Area: 3.1377E+7
KSAPATGGVKKPHR	H3K36me3	SSC 24h rep2	0.68	35.19	2.032	Normalized Area: 2.2641E+7
KSAPATGGVKKPHR	H3K36me3	SSC 24h rep3	0.7	35.17	2.0019	Normalized Area: 2.5919E+7
KSAPATGGVKKPHR	H3K37ac	SSC 24h rep1	1	43.89	0.1272	Normalized Area: 6.8972E+5
KSAPATGGVKKPHR	H3K37ac	SSC 24h rep2	1	44.3	0.1247	Normalized Area: 6.7266E+5
KSAPATGGVKKPHR	H3K37ac	SSC 24h rep3	1	44.29	0.1251	Normalized Area: 6.4054E+5
KSAPATGGVKKPHR	H3K37me1	SSC 24h rep1	0.82	51.41	6.4073	Normalized Area: 8.6262E+8
KSAPATGGVKKPHR	H3K37me1	SSC 24h rep2	0.89	51.61	6.4988	Normalized Area: 8.1148E+8
KSAPATGGVKKPHR	H3K37me1	SSC 24h rep3	0.84	51.73	6.5802	Normalized Area: 8.3960E+8
KSAPATGGVKKPHR	H3K27	SSC 24h rep1	1	47.56	26.7688	Normalized Area: 5.3458E+8
KSAPATGGVKKPHR	H3K27	SSC 24h rep2	1	47.56	25.4439	Normalized Area: 4.9744E+8
KSAPATGGVKKPHR	H3K27	SSC 24h rep3	1	47.56	26.6594	Normalized Area: 5.1316E+8
KSAPATGGVKKPHR	H3K27me1	SSC 24h rep1	1	53.29	4.592	Normalized Area: 9.8040E+8
KSAPATGGVKKPHR	H3K27me1	SSC 24h rep2	1	53.21	4.5495	Normalized Area: 9.6969E+8
KSAPATGGVKKPHR	H3K27me1	SSC 24h rep3	1	53.24	4.4825	Normalized Area: 1.0385E+9
KSAPATGGVKKPHR	H3K27me2	SSC 24h rep1	1	30.46	2.9224	Normalized Area: 8.3997E+7
KSAPATGGVKKPHR	H3K27me2	SSC 24h rep2	1	30.53	2.9074	Normalized Area: 8.5049E+7
KSAPATGGVKKPHR	H3K27me2	SSC 24h rep3	1	30.47	2.8542	Normalized Area: 8.9602E+7
KSAPATGGVKKPHR	H3S28ph	SSC 24h rep1	1	51.79	0.0201	Normalized Area: 3.9139E+5
KSAPATGGVKKPHR	H3S28ph	SSC 24h rep2	0.92	51.71	0.0185	Normalized Area: 3.5682E+5
KSAPATGGVKKPHR	H3S28ph	SSC 24h rep3	1	51.71	0.0231	Normalized Area: 4.5044E+5
KSAPATGGVKKPHR	H3K36me1	SSC 24h rep1	1	51.99	7.2482	Normalized Area: 6.7342E+8
KSAPATGGVKKPHR	H3K36me1	SSC 24h rep2	1	51.94	7.5704	Normalized Area: 6.9251E+8
KSAPATGGVKKPHR	H3K36me1	SSC 24h rep3	1	51.95	7.4193	Normalized Area: 7.1974E+8
KSAPATGGVKKPHR	H3K36ac	SSC 24h rep1	1	44.68	0.0139	Normalized Area: 6.3975E+5
KSAPATGGVKKPHR	H3K36ac	SSC 24h rep2	0.92	44.53	0.0123	Normalized Area: 5.5734E+5
KSAPATGGVKKPHR	H3K36ac	SSC 24h rep3	1	44.61	0.013	Normalized Area: 5.9096E+5
KSTGGKAPR	H3K9bu	SSC 24h rep1	1	40.07	178.401	Normalized Area: 5.0048E+9
KSTGGKAPR	H3K9bu	SSC 24h rep2	1	40.54	182.303	Normalized Area: 4.9021E+9
KSTGGKAPR	H3K9bu	SSC 24h rep3	1	40.57	173.319	Normalized Area: 4.9701E+9
KSTGGKAPR	H3K14ac	SSC 24h rep1	1	25.26	117.718	Normalized Area: 2.1598E+9
KSTGGKAPR	H3K14ac	SSC 24h rep2	1	25.8	119.898	Normalized Area: 2.1832E+9
KSTGGKAPR	H3K14ac	SSC 24h rep3	1	25.83	114.516	Normalized Area: 2.2122E+9
KSTGGKAPR	H3K14me1	SSC 24h rep1	0.5	38.87	0.3504	Normalized Area: 9.5191E+6
KSTGGKAPR	H3K14me1	SSC 24h rep2	0.5	37.96	0.0867	Normalized Area: 1.4193E+6
KSTGGKAPR	H3K14me1	SSC 24h rep3	0.5	39.4	0.3403	Normalized Area: 1.1041E+7
KSTGGKAPR	H3K9	SSC 24h rep1	0.71	31.53	397.202	Normalized Area: 1.0170E+10
KSTGGKAPR	H3K9	SSC 24h rep2	0.67	31.47	378.297	Normalized Area: 1.0451E+10
KSTGGKAPR	H3K9	SSC 24h rep3	0.67	31.37	372.192	Normalized Area: 1.0546E+10
KSTGGKAPR	H3K9ac	SSC 24h rep1	1	25.74	2.2911	Normalized Area: 1.7399E+7
KSTGGKAPR	H3K9ac	SSC 24h rep2	1	25.75	2.2153	Normalized Area: 1.6057E+7
KSTGGKAPR	H3K9ac	SSC 24h rep3	1	25.61	2.2349	Normalized Area: 1.7024E+7
KSTGGKAPR	H3S10ph	SSC 24h rep1	1	39.03	0.0746	Normalized Area: 6.8056E+6
KSTGGKAPR	H3S10ph	SSC 24h rep2	1	38.9	0.0754	Normalized Area: 7.0600E+6
KSTGGKAPR	H3S10ph	SSC 24h rep3	1	38.91	0.077	Normalized Area: 7.2876E+6
KSTGGKAPR	H3K9me2	SSC 24h rep1	1	10.01	191.344	Normalized Area: 1.4216E+9
KSTGGKAPR	H3K9me2	SSC 24h rep2	1	9.92	193.597	Normalized Area: 1.4047E+9
KSTGGKAPR	H3K9me2	SSC 24h rep3	1	10.02	197.032	Normalized Area: 1.4908E+9
KSTGGKAPR	H3K9me3	SSC 24h rep1	1	9.65	48.0075	Normalized Area: 1.0250E+9
KSTGGKAPR	H3K9me3	SSC 24h rep2	1	9.63	50.4595	Normalized Area: 1.1602E+9
KSTGGKAPR	H3K9me3	SSC 24h rep3	1	9.74	50.8559	Normalized Area: 1.0984E+9
TKQTAR	H3K4ac	SSC 24h rep1	0.6	8.88	0.028	Normalized Area: 7.0201E+5
TKQTAR	H3K4ac	SSC 24h rep2	0.6	8.95	0.0278	Normalized Area: 6.9528E+5
TKQTAR	H3K4ac	SSC 24h rep3	0.6	9.04	0.0269	Normalized Area: 7.5079E+5
TKQTAR	H3K4	SSC 24h rep1	0.7	12.32	13.1485	Normalized Area: 2.6526E+9
TKQTAR	H3K4	SSC 24h rep2	0.6	12.41	13.1506	Normalized Area: 3.0725E+9
TKQTAR	H3K4	SSC 24h rep3	0.8	12.24	12.9584	Normalized Area: 2.9244E+9
TKQTAR	H3K4me1	SSC 24h rep1	0.9	21	11.827	Normalized Area: 3.8392E+8
TKQTAR	H3K4me1	SSC 24h rep2	0.6	20.9	10.324	Normalized Area: 4.7329E+8
TKQTAR	H3K4me1	SSC 24h rep3	0.7	20.94	9.1342	Normalized Area: 4.6467E+8
VTIMPKDIQLAR	H3K122me1	SSC 24h rep1	0.5	87.9	0.1396	Normalized Area: 1.9268E+6
VTIMPKDIQLAR	H3K122me1	SSC 24h rep2	0.53	87.93	0.1053	Normalized Area: 1.8028E+6
VTIMPKDIQLAR	H3K122me1	SSC 24h rep3	0.58	88.02	0.1394	Normalized Area: 2.1279E+6
VTIMPKDIQLAR	H3K122	SSC 24h rep1	1	86	165.579	Normalized Area: 2.4976E+9
VTIMPKDIQLAR	H3K122	SSC 24h rep2	1	85.98	164.026	Normalized Area: 2.9363E+9
VTIMPKDIQLAR	H3K122	SSC 24h rep3	1	86	164.882	Normalized Area: 2.5925E+9
VTIMPKDIQLAR	H3K122bu	SSC 24h rep1	0.83	88.12	0.0984	Normalized Area: 1.6570E+6
VTIMPKDIQLAR	H3K122bu	SSC 24h rep2	0.92	88.14	0.0952	Normalized Area: 1.9602E+6
VTIMPKDIQLAR	H3K122bu	SSC 24h rep3	0.83	88.13	0.0896	Normalized Area: 1.7805E+6
YQKSTELLIR	H3K56	SSC 24h rep1	1	76.04	0.6973	Normalized Area: 3.9198E+8
YQKSTELLIR	H3K56	SSC 24h rep2	1	76.13	0.7082	Normalized Area: 4.3946E+8
YQKSTELLIR	H3K56	SSC 24h rep3	1	76.32	0.7248	Normalized Area: 3.8898E+8
YRPGTVALR	H3Y41	SSC 24h rep1	1	42.75	152.938	Normalized Area: 3.1460E+9
YRPGTVALR	H3Y41	SSC 24h rep2	1	42.64	158.446	Normalized Area: 3.1869E+9
YRPGTVALR	H3Y41	SSC 24h rep3	1	42.64	162.928	Normalized Area: 3.5296E+9

## Sheet: 48h
Peptide	Protein	Replicate	Peptide Peak Found Ratio	Peptide Retention Time	Ratio To Standard	Quantification
ARTKQTAR	H3R2	SSC 48h rep1	1	9.51	0.1574	Normalized Area: 5.8981E+6
ARTKQTAR	H3R2	SSC 48h rep2	1	9.58	0.1576	Normalized Area: 5.5351E+6
ARTKQTAR	H3R2	SSC 48h rep3	1	9.59	0.1608	Normalized Area: 6.0623E+6
EIAQDFKTDLR	H3K79	SSC 48h rep1	1	83.08	0.5568	Normalized Area: 4.5640E+8
EIAQDFKTDLR	H3K79	SSC 48h rep2	1	83.33	0.6012	Normalized Area: 4.6422E+8
EIAQDFKTDLR	H3K79	SSC 48h rep3	1	83.02	0.5818	Normalized Area: 5.4106E+8
EIAQDFKTDLR	H3K79me1	SSC 48h rep1	1	86.45	0.029	Normalized Area: 6.2560E+7
EIAQDFKTDLR	H3K79me1	SSC 48h rep2	1	86.7	0.0304	Normalized Area: 5.9526E+7
EIAQDFKTDLR	H3K79me1	SSC 48h rep3	1	86.44	0.0297	Normalized Area: 8.1689E+7
EIAQDFKTDLR	H3K79me2	SSC 48h rep1	1	65.44	0.2571	Normalized Area: 7.4787E+6
EIAQDFKTDLR	H3K79me2	SSC 48h rep2	1	65.63	0.2574	Normalized Area: 7.2568E+6
EIAQDFKTDLR	H3K79me2	SSC 48h rep3	1	65.3	0.2355	Normalized Area: 7.0026E+6
EIAQDFKTDLR	H3K79bu	SSC 48h rep1	1	86.49	31.6169	Normalized Area: 7.7430E+7
EIAQDFKTDLR	H3K79bu	SSC 48h rep2	1	86.59	23.0016	Normalized Area: 7.4589E+7
EIAQDFKTDLR	H3K79bu	SSC 48h rep3	1	86.44	23.5902	Normalized Area: 1.0591E+8
KLPFQR	H3K64	SSC 48h rep1	1	67.26	263.869	Normalized Area: 1.5141E+9
KLPFQR	H3K64	SSC 48h rep2	1	67.4	264.164	Normalized Area: 1.6697E+9
KLPFQR	H3K64	SSC 48h rep3	1	67.15	263.199	Normalized Area: 1.7793E+9
KLPFQR	H3K64fo	SSC 48h rep1	0.5	62.12	0.0352	Normalized Area: 5.2411E+5
KLPFQR	H3K64fo	SSC 48h rep2	0.58	62.23	0.0324	Normalized Area: 4.6565E+5
KLPFQR	H3K64fo	SSC 48h rep3	0.58	62	0.0355	Normalized Area: 5.2062E+5
KQLATKAAR	H3K18	SSC 48h rep1	1	63.82	164.375	Normalized Area: 3.9393E+10
KQLATKAAR	H3K18	SSC 48h rep2	1	64.09	166.331	Normalized Area: 3.9490E+10
KQLATKAAR	H3K18	SSC 48h rep3	1	63.9	165.937	Normalized Area: 4.0253E+10
KQLATKAAR	H3K18me1	SSC 48h rep1	0.83	69.97	1.8348	Normalized Area: 1.4346E+8
KQLATKAAR	H3K18me1	SSC 48h rep2	0.83	70.31	1.8829	Normalized Area: 1.4699E+8
KQLATKAAR	H3K18me1	SSC 48h rep3	0.83	70.06	1.8982	Normalized Area: 1.4530E+8
KQLATKAAR	H3K18me2	SSC 48h rep1	1	40.33	0.013	Normalized Area: 3.2275E+6
KQLATKAAR	H3K18me2	SSC 48h rep2	1	40.43	0.0122	Normalized Area: 2.9881E+6
KQLATKAAR	H3K18me2	SSC 48h rep3	1	40.55	0.0124	Normalized Area: 3.1173E+6
KQLATKAAR	H3K18ub	SSC 48h rep1	1	60.66	0.1848	Normalized Area: 2.5431E+6
KQLATKAAR	H3K18ub	SSC 48h rep2	1	60.82	0.187	Normalized Area: 2.5799E+6
KQLATKAAR	H3K18ub	SSC 48h rep3	1	60.8	0.1751	Normalized Area: 2.2958E+6
KQLATKAAR	H3K23ac	SSC 48h rep1	1	60.12	176.696	Normalized Area: 9.0835E+9
KQLATKAAR	H3K23ac	SSC 48h rep2	1	60.27	177.517	Normalized Area: 9.1545E+9
KQLATKAAR	H3K23ac	SSC 48h rep3	1	60.23	186.83	Normalized Area: 9.6685E+9
KQLATKAAR	H3K23bu	SSC 48h rep1	0.71	68.71	0.0086	Normalized Area: 1.0179E+6
KQLATKAAR	H3K23bu	SSC 48h rep2	0.75	68.97	0.0084	Normalized Area: 1.1097E+6
KQLATKAAR	H3K23bu	SSC 48h rep3	0.71	68.78	0.0076	Normalized Area: 1.0001E+6
KQLATKAAR	H3K23fo	SSC 48h rep1	1	58.63	0.0905	Normalized Area: 7.4030E+6
KQLATKAAR	H3K23fo	SSC 48h rep2	1	58.99	0.0884	Normalized Area: 6.9665E+6
KQLATKAAR	H3K23fo	SSC 48h rep3	1	58.71	0.0916	Normalized Area: 7.8494E+6
KQLATKAAR	H3K18ac	SSC 48h rep1	1	59.9	189.91	Normalized Area: 3.5131E+9
KQLATKAAR	H3K18ac	SSC 48h rep2	1	59.96	186.93	Normalized Area: 3.4583E+9
KQLATKAAR	H3K18ac	SSC 48h rep3	1	59.77	199.503	Normalized Area: 3.5827E+9
KQLATKAAR	H3K18bu	SSC 48h rep1	1	68.86	0.7816	Normalized Area: 1.0194E+7
KQLATKAAR	H3K18bu	SSC 48h rep2	1	69.05	0.8198	Normalized Area: 9.7199E+6
KQLATKAAR	H3K18bu	SSC 48h rep3	1	68.75	0.8295	Normalized Area: 9.5344E+6
KQLATKAAR	H3K18fo	SSC 48h rep1	1	58.13	0.6388	Normalized Area: 5.0879E+6
KQLATKAAR	H3K18fo	SSC 48h rep2	1	58.25	0.6411	Normalized Area: 5.1959E+6
KQLATKAAR	H3K18fo	SSC 48h rep3	1	58.03	0.6238	Normalized Area: 5.2269E+6
KSAPATGGVKKPHR	H3K27me3	SSC 48h rep1	1	30.37	0.0254	Normalized Area: 8.1198E+5
KSAPATGGVKKPHR	H3K27me3	SSC 48h rep2	1	30.5	0.0264	Normalized Area: 8.6646E+5
KSAPATGGVKKPHR	H3K27me3	SSC 48h rep3	1	30.58	0.0273	Normalized Area: 9.1241E+5
KSAPATGGVKKPHR	H3K27ac	SSC 48h rep1	1	43.89	1.678	Normalized Area: 1.9756E+7
KSAPATGGVKKPHR	H3K27ac	SSC 48h rep2	1	44.2	1.6327	Normalized Area: 2.0256E+7
KSAPATGGVKKPHR	H3K27ac	SSC 48h rep3	1	43.98	1.6901	Normalized Area: 2.0212E+7
KSAPATGGVKKPHR	H3K27bu	SSC 48h rep1	1	53.46	510.509	Normalized Area: 7.1225E+8
KSAPATGGVKKPHR	H3K27bu	SSC 48h rep2	1	53.76	532.663	Normalized Area: 6.2222E+8
KSAPATGGVKKPHR	H3K27bu	SSC 48h rep3	1	53.49	539.566	Normalized Area: 7.3741E+8
KSAPATGGVKKPHR	H3K36me2	SSC 48h rep1	1	35.88	5.9555	Normalized Area: 1.3343E+8
KSAPATGGVKKPHR	H3K36me2	SSC 48h rep2	1	36.09	5.4643	Normalized Area: 1.2595E+8
KSAPATGGVKKPHR	H3K36me2	SSC 48h rep3	1	36.15	5.6726	Normalized Area: 1.2506E+8
KSAPATGGVKKPHR	H3K36me3	SSC 48h rep1	0.64	35.78	1.6515	Normalized Area: 1.6502E+7
KSAPATGGVKKPHR	H3K36me3	SSC 48h rep2	0.66	35.88	1.755	Normalized Area: 1.7773E+7
KSAPATGGVKKPHR	H3K36me3	SSC 48h rep3	0.61	36.03	1.5243	Normalized Area: 1.5327E+7
KSAPATGGVKKPHR	H3K37ac	SSC 48h rep1	1	44.88	0.1045	Normalized Area: 5.7546E+5
KSAPATGGVKKPHR	H3K37ac	SSC 48h rep2	1	45.14	0.1192	Normalized Area: 6.6349E+5
KSAPATGGVKKPHR	H3K37ac	SSC 48h rep3	1	45.03	0.123	Normalized Area: 6.7683E+5
KSAPATGGVKKPHR	H3K37me1	SSC 48h rep1	0.86	52.04	3.6904	Normalized Area: 4.6540E+8
KSAPATGGVKKPHR	H3K37me1	SSC 48h rep2	0.84	52.39	3.6986	Normalized Area: 5.2591E+8
KSAPATGGVKKPHR	H3K37me1	SSC 48h rep3	0.84	52.22	3.73	Normalized Area: 4.8274E+8
KSAPATGGVKKPHR	H3K27	SSC 48h rep1	1	47.79	18.8818	Normalized Area: 4.3378E+8
KSAPATGGVKKPHR	H3K27	SSC 48h rep2	1	47.91	19.4793	Normalized Area: 4.2135E+8
KSAPATGGVKKPHR	H3K27	SSC 48h rep3	1	47.73	19.5983	Normalized Area: 3.9330E+8
KSAPATGGVKKPHR	H3K27me1	SSC 48h rep1	1	53.51	2.7725	Normalized Area: 6.9998E+8
KSAPATGGVKKPHR	H3K27me1	SSC 48h rep2	1	53.57	2.8146	Normalized Area: 6.8711E+8
KSAPATGGVKKPHR	H3K27me1	SSC 48h rep3	1	53.35	2.9643	Normalized Area: 7.4401E+8
KSAPATGGVKKPHR	H3K27me2	SSC 48h rep1	1	30.59	2.0281	Normalized Area: 5.1232E+7
KSAPATGGVKKPHR	H3K27me2	SSC 48h rep2	1	30.87	2.0579	Normalized Area: 6.7271E+7
KSAPATGGVKKPHR	H3K27me2	SSC 48h rep3	1	30.73	2.0791	Normalized Area: 6.5022E+7
KSAPATGGVKKPHR	H3S28ph	SSC 48h rep1	1	51.68	0.0177	Normalized Area: 3.4428E+5
KSAPATGGVKKPHR	H3S28ph	SSC 48h rep2	1	51.84	0.0157	Normalized Area: 3.0499E+5
KSAPATGGVKKPHR	H3S28ph	SSC 48h rep3	1	51.68	0.0164	Normalized Area: 3.3449E+5
KSAPATGGVKKPHR	H3K36me1	SSC 48h rep1	1	52	4.7354	Normalized Area: 4.2122E+8
KSAPATGGVKKPHR	H3K36me1	SSC 48h rep2	1	52.19	4.9097	Normalized Area: 4.4953E+8
KSAPATGGVKKPHR	H3K36me1	SSC 48h rep3	1	52.07	4.8636	Normalized Area: 4.2559E+8
KSAPATGGVKKPHR	H3K36ac	SSC 48h rep1	1	44.9	0.013	Normalized Area: 5.2346E+5
KSAPATGGVKKPHR	H3K36ac	SSC 48h rep2	1	45.05	0.0142	Normalized Area: 6.6938E+5
KSAPATGGVKKPHR	H3K36ac	SSC 48h rep3	1	44.75	0.013	Normalized Area: 5.8167E+5
KSTGGKAPR	H3K9bu	SSC 48h rep1	1	41.01	169.114	Normalized Area: 4.9273E+9
KSTGGKAPR	H3K9bu	SSC 48h rep2	1	41.19	161.262	Normalized Area: 4.7278E+9
KSTGGKAPR	H3K9bu	SSC 48h rep3	1	41.13	162.692	Normalized Area: 4.9818E+9
KSTGGKAPR	H3K14ac	SSC 48h rep1	1	26.3	55.2874	Normalized Area: 8.9363E+8
KSTGGKAPR	H3K14ac	SSC 48h rep2	1	26.29	52.7614	Normalized Area: 9.7711E+8
KSTGGKAPR	H3K14ac	SSC 48h rep3	1	26.31	52.4342	Normalized Area: 9.2997E+8
KSTGGKAPR	H3K14me1	SSC 48h rep1	0.5	39.9	0.2863	Normalized Area: 6.9266E+6
KSTGGKAPR	H3K14me1	SSC 48h rep2	0.58	40.07	0.3027	Normalized Area: 8.6862E+6
KSTGGKAPR	H3K14me1	SSC 48h rep3	0.5	39.96	0.2973	Normalized Area: 9.8603E+6
KSTGGKAPR	H3K9	SSC 48h rep1	0.67	31.53	237.177	Normalized Area: 6.4585E+9
KSTGGKAPR	H3K9	SSC 48h rep2	0.71	31.6	236.481	Normalized Area: 6.1432E+9
KSTGGKAPR	H3K9	SSC 48h rep3	0.75	31.42	233.682	Normalized Area: 6.1828E+9
KSTGGKAPR	H3K9ac	SSC 48h rep1	1	25.79	1.3672	Normalized Area: 1.0350E+7
KSTGGKAPR	H3K9ac	SSC 48h rep2	1	25.83	1.3927	Normalized Area: 1.0126E+7
KSTGGKAPR	H3K9ac	SSC 48h rep3	1	25.79	1.2784	Normalized Area: 1.0327E+7
KSTGGKAPR	H3S10ph	SSC 48h rep1	1	38.81	0.0399	Normalized Area: 3.4784E+6
KSTGGKAPR	H3S10ph	SSC 48h rep2	1	39.08	0.0393	Normalized Area: 3.2582E+6
KSTGGKAPR	H3S10ph	SSC 48h rep3	1	38.81	0.0385	Normalized Area: 2.9620E+6
KSTGGKAPR	H3K9me2	SSC 48h rep1	1	9.88	209.598	Normalized Area: 1.2373E+9
KSTGGKAPR	H3K9me2	SSC 48h rep2	1	10.15	213.137	Normalized Area: 1.3382E+9
KSTGGKAPR	H3K9me2	SSC 48h rep3	1	10.15	207.507	Normalized Area: 1.3381E+9
KSTGGKAPR	H3K9me3	SSC 48h rep1	1	9.64	37.8496	Normalized Area: 7.6535E+8
KSTGGKAPR	H3K9me3	SSC 48h rep2	1	9.9	38.3173	Normalized Area: 6.5988E+8
KSTGGKAPR	H3K9me3	SSC 48h rep3	1	9.89	39.2695	Normalized Area: 6.6941E+8
TKQTAR	H3K4ac	SSC 48h rep1	0.6	9.29	0.0192	Normalized Area: 5.1745E+5
TKQTAR	H3K4ac	SSC 48h rep2	0.6	9.36	0.0196	Normalized Area: 4.7445E+5
TKQTAR	H3K4ac	SSC 48h rep3	0.6	9.29	0.0197	Normalized Area: 5.2605E+5
TKQTAR	H3K4	SSC 48h rep1	0.8	12.58	7.9728	Normalized Area: 1.8629E+9
TKQTAR	H3K4	SSC 48h rep2	0.6	12.41	8.1246	Normalized Area: 1.6993E+9
TKQTAR	H3K4	SSC 48h rep3	0.6	12.35	7.846	Normalized Area: 1.8372E+9
TKQTAR	H3K4me1	SSC 48h rep1	0.8	20.96	9.1118	Normalized Area: 3.0289E+8
TKQTAR	H3K4me1	SSC 48h rep2	0.7	21.12	9.1685	Normalized Area: 2.2793E+8
TKQTAR	H3K4me1	SSC 48h rep3	0.8	20.99	9.3867	Normalized Area: 2.5596E+8
VTIMPKDIQLAR	H3K122me1	SSC 48h rep1	0.53	88.14	0.0568	Normalized Area: 1.1094E+6
VTIMPKDIQLAR	H3K122me1	SSC 48h rep2	0.58	88.36	0.0789	Normalized Area: 1.2771E+6
VTIMPKDIQLAR	H3K122me1	SSC 48h rep3	0.53	88.16	0.0571	Normalized Area: 1.3411E+6
VTIMPKDIQLAR	H3K122	SSC 48h rep1	1	86.08	100.865	Normalized Area: 1.4402E+9
VTIMPKDIQLAR	H3K122	SSC 48h rep2	1	86.21	98.5411	Normalized Area: 1.3546E+9
VTIMPKDIQLAR	H3K122	SSC 48h rep3	1	86.01	100.737	Normalized Area: 1.8616E+9
VTIMPKDIQLAR	H3K122bu	SSC 48h rep1	0.83	88.13	0.0642	Normalized Area: 1.1797E+6
VTIMPKDIQLAR	H3K122bu	SSC 48h rep2	0.83	88.28	0.072	Normalized Area: 1.2624E+6
VTIMPKDIQLAR	H3K122bu	SSC 48h rep3	0.92	88.13	0.0643	Normalized Area: 1.6450E+6
YQKSTELLIR	H3K56	SSC 48h rep1	1	76.63	0.3056	Normalized Area: 2.0807E+8
YQKSTELLIR	H3K56	SSC 48h rep2	1	76.94	0.3201	Normalized Area: 2.1213E+8
YQKSTELLIR	H3K56	SSC 48h rep3	1	76.64	0.3274	Normalized Area: 2.1924E+8
YRPGTVALR	H3Y41	SSC 48h rep1	1	43.12	106.209	Normalized Area: 2.2888E+9
YRPGTVALR	H3Y41	SSC 48h rep2	1	43.16	112.707	Normalized Area: 2.2758E+9
YRPGTVALR	H3Y41	SSC 48h rep3	1	42.99	108.139	Normalized Area: 2.3024E+9

## Sheet: All
Peptide	Protein	0h rep1	0h rep2	0h rep3	24h rep1	24h rep2	24h rep3	48h rep1	48h rep2	48h rep3	>>normalization	0h rep1	0h rep2	0h rep3	24h rep1	24h rep2	24h rep3	48h rep1	48h rep2	48h rep3	0h_mean	24h_mean	48_mean	FC(MAX/MIN)	ANOVA q-value	Diff
ARTKQTAR	H3R2	0.1069	0.1096	0.1003	0.2068	0.2126	0.2078	0.1574	0.1576	0.1608	>>normalization	1	1	1	1	1	1	1	1	1	1	1	1	1	1	NO
EIAQDFKTDLR	H3K79	0.5779	0.5995	0.5798	1.4294	1.4849	1.5101	0.5568	0.6012	0.5818	>>normalization	1	1	1	1	1	1	1	1	1	1	1	1	1	1	NO
EIAQDFKTDLR	H3K79me1	0.0286	0.0287	0.0289	0.0681	0.0686	0.0669	0.029	0.0304	0.0297	>>normalization	0.0494895	0.0478732	0.0498448	0.0476424	0.0461984	0.0443017	0.0520833	0.0505655	0.0510485	0.0490692	0.0460475	0.0512324	1.1126	0.0101908	NO
EIAQDFKTDLR	H3K79me2	0.2233	0.2222	0.2302	0.4581	0.4744	0.4429	0.2571	0.2574	0.2355	>>normalization	0.386399	0.370642	0.397033	0.320484	0.319483	0.293292	0.461746	0.428144	0.404778	0.384692	0.311086	0.431556	1.38725	0.00202125	NO
EIAQDFKTDLR	H3K79bu	13.1774	20.3593	22.6355	39.7914	50.2917	39.3913	31.6169	23.0016	23.5902	>>normalization	22.8022	33.9605	39.0402	27.8378	33.8687	26.0852	56.7832	38.2595	40.5469	31.9343	29.2639	45.1965	1.54445	0.137562	NO
KLPFQR	H3K64	196.458	196.502	197.084	374.386	386.918	387.646	263.869	264.164	263.199	>>normalization	1	1	1	1	1	1	1	1	1	1	1	1	1	1	NO
KLPFQR	H3K64fo	0.027	0.0265	0.0275	0.0476	0.051	0.0514	0.0352	0.0324	0.0355	>>normalization	0.000137434	0.000134858	0.000139535	0.000127142	0.000131811	0.000132595	0.000133399	0.000122651	0.000134879	0.000137276	0.000130516	0.00013031	1.05345	0.224362	NO
KQLATKAAR	H3K18	163.407	168.461	171.858	272.769	272.918	274.987	164.375	166.331	165.937	>>normalization	1	1	1	1	1	1	1	1	1	1	1	1	1	1	NO
KQLATKAAR	H3K18me1	1.7476	1.75	1.7615	3.2359	3.2629	3.3081	1.8348	1.8829	1.8982	>>normalization	0.0106948	0.0103882	0.0102498	0.0118631	0.0119556	0.01203	0.0111623	0.0113202	0.0114393	0.0104442	0.0119496	0.0113072	1.14413	0.000294607	NO
KQLATKAAR	H3K18me2	0.0093	0.0093	0.0094	0.0157	0.0157	0.017	0.013	0.0122	0.0124	>>normalization	5.6913e-05	5.52056e-05	5.46964e-05	5.75578e-05	5.75264e-05	6.18211e-05	7.90876e-05	7.33475e-05	7.47271e-05	5.5605e-05	5.89684e-05	7.57208e-05	1.36176	0.000300312	NO
KQLATKAAR	H3K18ub	0.2241	0.2153	0.22	0.3872	0.3408	0.3481	0.1848	0.187	0.1751	>>normalization	0.00137142	0.00127804	0.00128013	0.00141951	0.00124873	0.00126588	0.00112426	0.00112426	0.00105522	0.00130986	0.00131137	0.00110125	1.19081	0.0199242	NO
KQLATKAAR	H3K23ac	180.858	181.181	178.741	333.969	286.179	329.551	176.696	177.517	186.83	>>normalization	1.10679	1.07551	1.04005	1.22436	1.04859	1.19843	1.07496	1.06725	1.12591	1.07412	1.15713	1.08937	1.07728	0.359547	NO
KQLATKAAR	H3K23bu	0.0575	0.058	0.0599	0.0188	0.0214	0.019	0.0086	0.0084	0.0076	>>normalization	0.000351882	0.000344293	0.000348544	6.89227e-05	7.84118e-05	6.90942e-05	5.23195e-05	5.05016e-05	4.58005e-05	0.00034824	7.21429e-05	4.95405e-05	7.02939	1.35626e-08	YES
KQLATKAAR	H3K23fo	0.0857	0.0879	0.0852	0.1279	0.1305	0.1308	0.0905	0.0884	0.0916	>>normalization	0.000524457	0.000521782	0.000495759	0.000468894	0.000478165	0.000475659	0.000550571	0.000531469	0.000552016	0.000513999	0.000474239	0.000544686	1.14855	0.00195783	NO
KQLATKAAR	H3K18ac	88.9889	92.1776	97.8078	236.507	239.272	232.822	189.91	186.93	199.503	>>normalization	0.544584	0.547174	0.569121	0.867058	0.876716	0.846665	1.15535	1.12384	1.20228	0.553626	0.86348	1.16049	2.09616	4.11482e-06	YES
KQLATKAAR	H3K18bu	1.7684	1.8443	1.9435	1.0202	0.9677	1.014	0.7816	0.8198	0.8295	>>normalization	0.010822	0.0109479	0.0113088	0.00374015	0.00354575	0.00368745	0.00475499	0.00492871	0.00499888	0.0110262	0.00365778	0.0048942	3.01446	1.6191e-07	YES
KQLATKAAR	H3K18fo	0.5545	0.5457	0.5362	0.8441	0.8059	0.8	0.6388	0.6411	0.6238	>>normalization	0.00339336	0.00323932	0.00312002	0.00309455	0.0029529	0.00290923	0.00388624	0.00385435	0.00375926	0.0032509	0.00298556	0.00383328	1.28394	0.000438578	NO
KSAPATGGVKKPHR	H3K27me3	0.0256	0.0253	0.0247	0.0424	0.0428	0.0407	0.0254	0.0264	0.0273	>>normalization	0.00171499	0.0016464	0.00167205	0.00158393	0.00168213	0.00152667	0.00134521	0.00135528	0.00139298	0.00167781	0.00159758	0.00136449	1.22962	0.0016858	NO
KSAPATGGVKKPHR	H3K27ac	1.176	1.0915	1.127	2.7602	2.6019	2.6875	1.678	1.6327	1.6901	>>normalization	0.0787824	0.0710293	0.0762914	0.103113	0.10226	0.100809	0.0888686	0.0838172	0.0862371	0.0753677	0.102061	0.0863076	1.35417	0.000274646	NO
KSAPATGGVKKPHR	H3K27bu	478.155	479.534	472.81	925.565	928.137	912.634	510.509	532.663	539.566	>>normalization	32.0325	31.2056	32.0066	34.5763	36.4778	34.2331	27.0371	27.3451	27.5313	31.7482	35.0957	27.3045	1.28535	0.000206475	NO
KSAPATGGVKKPHR	H3K36me2	3.8132	3.8177	3.7829	6.6978	6.4326	6.4607	5.9555	5.4643	5.6726	>>normalization	0.255453	0.248437	0.256081	0.250209	0.252815	0.242342	0.31541	0.280518	0.289443	0.253323	0.248456	0.295124	1.18783	0.00725649	NO
KSAPATGGVKKPHR	H3K36me3	1.4139	1.4677	1.3285	2.3348	2.032	2.0019	1.6515	1.755	1.5243	>>normalization	0.0947197	0.0955105	0.0899318	0.0872209	0.079862	0.0750917	0.0874652	0.0900956	0.0777772	0.0933873	0.0807249	0.0851127	1.15686	0.107221	NO
KSAPATGGVKKPHR	H3K37ac	0.1017	0.0975	0.1107	0.1272	0.1247	0.1251	0.1045	0.1192	0.123	>>normalization	0.00681307	0.00634481	0.00749376	0.0047518	0.00490098	0.00469253	0.00553443	0.00611932	0.00627605	0.00688388	0.00478177	0.0059766	1.43961	0.00403804	NO
KSAPATGGVKKPHR	H3K37me1	3.2885	3.3358	3.2603	6.4073	6.4988	6.5802	3.6904	3.6986	3.73	>>normalization	0.220303	0.217077	0.220704	0.239357	0.255417	0.246825	0.195447	0.189873	0.190323	0.219361	0.2472	0.191881	1.2883	0.000205136	NO
KSAPATGGVKKPHR	H3K27	14.9272	15.3669	14.7723	26.7688	25.4439	26.6594	18.8818	19.4793	19.5983	>>normalization	1	1	1	1	1	1	1	1	1	1	1	1	1	1	NO
KSAPATGGVKKPHR	H3K27me1	2.3745	2.3999	2.4481	4.592	4.5495	4.4825	2.7725	2.8146	2.9643	>>normalization	0.159072	0.156173	0.165722	0.171543	0.178805	0.16814	0.146835	0.144492	0.151253	0.160323	0.172829	0.147526	1.17151	0.00330587	NO
KSAPATGGVKKPHR	H3K27me2	1.3611	1.3251	1.3772	2.9224	2.9074	2.8542	2.0281	2.0579	2.0791	>>normalization	0.0911825	0.0862308	0.0932285	0.109172	0.114267	0.107062	0.10741	0.105645	0.106086	0.090214	0.110167	0.106381	1.22117	0.00104171	NO
KSAPATGGVKKPHR	H3S28ph	0.0065	0.0049	0.0062	0.0201	0.0185	0.0231	0.0177	0.0157	0.0164	>>normalization	0.000435447	0.000318867	0.000419704	0.000750874	0.00072709	0.000866486	0.000937411	0.000805984	0.000836807	0.000391339	0.000781483	0.000860067	2.19775	0.000886275	YES
KSAPATGGVKKPHR	H3K36me1	3.6994	3.7351	3.8083	7.2482	7.5704	7.4193	4.7354	4.9097	4.8636	>>normalization	0.247829	0.243061	0.2578	0.27077	0.297533	0.2783	0.250792	0.252047	0.248164	0.249564	0.282201	0.250334	1.13078	0.0120516	NO
KSAPATGGVKKPHR	H3K36ac	0.0091	0.0093	0.0093	0.0139	0.0123	0.013	0.013	0.0142	0.013	>>normalization	0.000609625	0.000605197	0.000629557	0.000519261	0.000483416	0.000487633	0.000688494	0.000728979	0.000663323	0.000614793	0.00049677	0.000693598	1.39622	0.000438578	NO
KSTGGKAPR	H3K9bu	77.7044	82.2467	80.6992	178.401	182.303	173.319	169.114	161.262	162.692	>>normalization	0.384993	0.417636	0.410667	0.449144	0.481904	0.46567	0.713031	0.681923	0.696211	0.404432	0.465573	0.697055	1.72354	1.27717e-05	YES
KSTGGKAPR	H3K14ac	43.8968	45.3336	46.057	117.718	119.898	114.516	55.2874	52.7614	52.4342	>>normalization	0.21749	0.230197	0.234378	0.296369	0.31694	0.307679	0.233106	0.223111	0.224383	0.227355	0.306996	0.226867	1.3532	0.000205136	NO
KSTGGKAPR	H3K14me1	0.2096	0.2096	0.2217	0.3504	0.0867	0.3403	0.2863	0.3027	0.2973	>>normalization	0.00103848	0.00106432	0.0011282	0.00088217	0.000229185	0.000914314	0.00120712	0.00128002	0.00127224	0.001077	0.000675223	0.00125313	1.85587	0.0763643	NO
KSTGGKAPR	H3K9	201.833	196.934	196.508	397.202	378.297	372.192	237.177	236.481	233.682	>>normalization	1	1	1	1	1	1	1	1	1	1	1	1	1	1	NO
KSTGGKAPR	H3K9ac	1.4381	1.4599	1.4464	2.2911	2.2153	2.2349	1.3672	1.3927	1.2784	>>normalization	0.00712519	0.00741315	0.00736053	0.00576809	0.00585597	0.0060047	0.00576448	0.00588927	0.00547068	0.00729962	0.00587626	0.00570814	1.27881	0.000206475	NO
KSTGGKAPR	H3S10ph	0.0185	0.0192	0.0188	0.0746	0.0754	0.077	0.0399	0.0393	0.0385	>>normalization	9.16598e-05	9.74947e-05	9.56706e-05	0.000187814	0.000199314	0.000206883	0.000168229	0.000166187	0.000164754	9.49417e-05	0.000198003	0.00016639	2.08553	1.42699e-05	YES
KSTGGKAPR	H3K9me2	87.7568	89.8693	87.1949	191.344	193.597	197.032	209.598	213.137	207.507	>>normalization	0.434798	0.456343	0.443723	0.481729	0.511758	0.529383	0.883722	0.901286	0.887989	0.444955	0.507623	0.890999	2.00245	1.34983e-06	YES
KSTGGKAPR	H3K9me3	23.1122	23.5699	23.244	48.0075	50.4595	50.8559	37.8496	38.3173	39.2695	>>normalization	0.114511	0.119684	0.118285	0.120864	0.133386	0.136639	0.159584	0.162031	0.168047	0.117494	0.130296	0.163221	1.38919	0.000438578	NO
TKQTAR	H3K4ac	0.0216	0.0206	0.0205	0.028	0.0278	0.0269	0.0192	0.0196	0.0197	>>normalization	0.00297648	0.00276882	0.00281636	0.00212952	0.00211397	0.00207587	0.00240819	0.00241243	0.00251083	0.00285388	0.00210646	0.00244382	1.35483	0.000206475	NO
TKQTAR	H3K4	7.2569	7.44	7.2789	13.1485	13.1506	12.9584	7.9728	8.1246	7.846	>>normalization	1	1	1	1	1	1	1	1	1	1	1	1	1	1	NO
TKQTAR	H3K4me1	5.8594	5.7256	5.7206	11.827	10.324	9.1342	9.1118	9.1685	9.3867	>>normalization	0.807425	0.76957	0.785915	0.899494	0.785059	0.704886	1.14286	1.12849	1.19637	0.787637	0.79648	1.1559	1.46756	0.00109185	NO
VTIMPKDIQLAR	H3K122me1	0.0481	0.0447	0.0439	0.1396	0.1053	0.1394	0.0568	0.0789	0.0571	>>normalization	0.000612046	0.000539972	0.000527307	0.000843102	0.000641969	0.000845455	0.000563128	0.000800681	0.000566821	0.000559775	0.000776842	0.000643543	1.38778	0.157158	NO
VTIMPKDIQLAR	H3K122	78.5889	82.7821	83.2532	165.579	164.026	164.882	100.865	98.5411	100.737	>>normalization	1	1	1	1	1	1	1	1	1	1	1	1	1	1	NO
VTIMPKDIQLAR	H3K122bu	0.0546	0.0498	0.0581	0.0984	0.0952	0.0896	0.0642	0.072	0.0643	>>normalization	0.000694755	0.000601579	0.000697871	0.000594278	0.000580394	0.00054342	0.000636493	0.00073066	0.000638294	0.000664735	0.000572697	0.000668482	1.16725	0.112072	NO
YQKSTELLIR	H3K56	0.304	0.3138	0.314	0.6973	0.7082	0.7248	0.3056	0.3201	0.3274	>>normalization	1	1	1	1	1	1	1	1	1	1	1	1	1	1	NO
YRPGTVALR	H3Y41	92.1975	93.6343	94.0143	152.938	158.446	162.928	106.209	112.707	108.139	>>normalization	1	1	1	1	1	1	1	1	1	1	1	1	1	1	NO
