# Supplementary material for: Multi-Omics Approaches for Revealing the Epigenetic Regulation of Histone H3.1 during Spermatogonial Stem Cell Differentiation In Vitro
Source: Int J Mol Sci. 2023 Feb 7;24(4):3314. doi: 10.3390/ijms24043314 (PMC9958608; doi:10.3390/ijms24043314)
Supplement: Supplementary file 1 [file ijms-24-03314-s001.zip › Table S2.xlsx]

## Sheet: Onbeads_biotinpulldown_SSC48h_2
Protein.ID	ENSEMBL	ENTREZID	Protein IDs	Majority protein IDs	Peptide counts (all)	Peptide counts (razor+unique)	Peptide counts (unique)	Protein names	Gene names	Fasta headers	Number of proteins	Peptides	Razor + unique peptides	Unique peptides	Peptides H3_REP1	Peptides H3_REP2	Peptides H3_REP3	Peptides K9ME2_REP1	Peptides K9ME2_REP2	Peptides K9ME2_REP3	Peptides S10PH_REP1	Peptides S10PH_REP2	Peptides S10PH_REP3	Razor + unique peptides H3_REP1	Razor + unique peptides H3_REP2	Razor + unique peptides H3_REP3	Razor + unique peptides K9ME2_REP1	Razor + unique peptides K9ME2_REP2	Razor + unique peptides K9ME2_REP3	Razor + unique peptides S10PH_REP1	Razor + unique peptides S10PH_REP2	Razor + unique peptides S10PH_REP3	Unique peptides H3_REP1	Unique peptides H3_REP2	Unique peptides H3_REP3	Unique peptides K9ME2_REP1	Unique peptides K9ME2_REP2	Unique peptides K9ME2_REP3	Unique peptides S10PH_REP1	Unique peptides S10PH_REP2	Unique peptides S10PH_REP3	Sequence coverage [%]	Unique + razor sequence coverage [%]	Unique sequence coverage [%]	Mol. weight [kDa]	Sequence length	Sequence lengths	Q-value	Score
A0A023T778	ENSMUSG00000030188	66441	A0A023T778;Q9CQL1;P61327;G3UZW7	A0A023T778;Q9CQL1;P61327;G3UZW7	5;5;5;4	5;5;5;4	5;5;5;4	Protein mago nashi homolog 2;Protein mago nashi homolog	Magohb;Magoh	tr|A0A023T778|A0A023T778_MOUSE Mago nashi protein OS=Mus musculus OX=10090 GN=Magohb PE=1 SV=1;sp|Q9CQL1|MGN2_MOUSE Protein mago nashi homolog 2 OS=Mus musculus OX=10090 GN=Magohb PE=2 SV=1;sp|P61327|MGN_MOUSE Protein mago nashi homolog OS=Mus musculus OX=	4	5	5	5	4	4	4	3	3	2	3	4	3	4	4	4	3	3	2	3	4	3	4	4	4	3	3	2	3	4	3	37.8	37.8	37.8	17.31	148	148;146;146;102	0	27.38
A0A087WQE6	ENSMUSG00000079658	67923	A0A087WQE6;A0A087WNT1;P83940;A0A087WPE4	A0A087WQE6;A0A087WNT1;P83940;A0A087WPE4	4;4;4;3	4;4;4;3	4;4;4;3	Transcription elongation factor B polypeptide 1	Tceb1	tr|A0A087WQE6|A0A087WQE6_MOUSE Elongin-C (Fragment) OS=Mus musculus OX=10090 GN=Eloc PE=1 SV=1;tr|A0A087WNT1|A0A087WNT1_MOUSE Elongin-C OS=Mus musculus OX=10090 GN=Eloc PE=1 SV=1;sp|P83940|ELOC_MOUSE Elongin-C OS=Mus musculus OX=10090 GN=Eloc PE=1 SV=1;tr|	4	4	4	4	3	4	2	2	1	2	2	4	2	3	4	2	2	1	2	2	4	2	3	4	2	2	1	2	2	4	2	58.9	58.9	58.9	10.657	95	95;134;112;51	0	27.819
F8VQC7	ENSMUSG00000021843	16709	F8VQC7;A0A087WNW3;A0A087WRS1;A0A087WQ25;A0A087WS23;A0A087WQF8;A0A087WQI3;A0A087WPW5;A0A087WQD0;A0A087WP85;A0A087WQQ5;A0A087WQG4;A0A087WP14;A0A087WS29;A0A087WS04;A0A087WPX0;A0A087WP48;Q61595-10;Q61595-11;Q61595-5;Q61595-15;Q61595;Q61595-7;Q61595-2;Q61595-13;Q61595-8;Q61595-4;Q61595-6;Q61595-14;Q61595-3;Q61595-16;Q61595-12;Q61595-9	F8VQC7;A0A087WNW3;A0A087WRS1;A0A087WQ25;A0A087WS23;A0A087WQF8;A0A087WQI3;A0A087WPW5;A0A087WQD0;A0A087WP85;A0A087WQQ5;A0A087WQG4;A0A087WP14;A0A087WS29;A0A087WS04;A0A087WPX0;A0A087WP48;Q61595-10;Q61595-11;Q61595-5;Q61595-15;Q61595;Q61595-7;Q61595-2;Q61595-13;Q61595-8;Q61595-4;Q61595-6;Q61595-14;Q61595-3;Q61595-16;Q61595-12;Q61595-9	6;6;6;6;6;6;6;6;6;6;6;6;6;6;6;6;6;6;6;6;6;6;6;6;6;6;6;6;6;6;6;6;6	6;6;6;6;6;6;6;6;6;6;6;6;6;6;6;6;6;6;6;6;6;6;6;6;6;6;6;6;6;6;6;6;6	6;6;6;6;6;6;6;6;6;6;6;6;6;6;6;6;6;6;6;6;6;6;6;6;6;6;6;6;6;6;6;6;6	Kinectin	Ktn1	tr|F8VQC7|F8VQC7_MOUSE Kinectin OS=Mus musculus OX=10090 GN=Ktn1 PE=1 SV=1;tr|A0A087WNW3|A0A087WNW3_MOUSE Kinectin OS=Mus musculus OX=10090 GN=Ktn1 PE=1 SV=1;tr|A0A087WRS1|A0A087WRS1_MOUSE Kinectin OS=Mus musculus OX=10090 GN=Ktn1 PE=1 SV=1;tr|A0A087WQ25|A	33	6	6	6	0	6	0	0	0	0	0	0	0	0	6	0	0	0	0	0	0	0	0	6	0	0	0	0	0	0	0	4.6	4.6	4.6	152.54	1327	1327;1247;1275;1270;1253;1200;1252;1252;1247;1275;1275;1229;1280;1228;1224;1304;1223;1275;1304;1275;1275;1327;1280;1200;1253;1252;1247;1247;1229;1228;1224;1223;1252	0	22.433
A0A087WP83	ENSMUSG00000034088	110611	A0A087WP83;Q8VDJ3;A0A087WQY9;A0A087WPC5;A0A087WS92;A0A087WPH2	A0A087WP83;Q8VDJ3;A0A087WQY9;A0A087WPC5;A0A087WS92	3;3;2;2;2;1	3;3;2;2;2;1	3;3;2;2;2;1	Vigilin	Hdlbp	tr|A0A087WP83|A0A087WP83_MOUSE Vigilin OS=Mus musculus OX=10090 GN=Hdlbp PE=1 SV=1;sp|Q8VDJ3|VIGLN_MOUSE Vigilin OS=Mus musculus OX=10090 GN=Hdlbp PE=1 SV=1;tr|A0A087WQY9|A0A087WQY9_MOUSE Vigilin (Fragment) OS=Mus musculus OX=10090 GN=Hdlbp PE=1 SV=6;tr|A0	6	3	3	3	1	1	1	2	0	1	0	1	1	1	1	1	2	0	1	0	1	1	1	1	1	2	0	1	0	1	1	3.7	3.7	3.7	134.21	1199	1199;1268;129;141;178;22	0	6.9487
A0A087WPH5	ENSMUSG00000026200	74577	A0A087WPH5;Q8VC60-2;Q8VC60	A0A087WPH5;Q8VC60-2;Q8VC60	1;1;1	1;1;1	1;1;1	Beta-galactosidase-1-like protein	Glb1l	tr|A0A087WPH5|A0A087WPH5_MOUSE Beta-galactosidase-1-like protein (Fragment) OS=Mus musculus OX=10090 GN=Glb1l PE=1 SV=1;sp|Q8VC60-2|GLB1L_MOUSE Isoform 2 of Beta-galactosidase-1-like protein OS=Mus musculus OX=10090 GN=Glb1l;sp|Q8VC60|GLB1L_MOUSE Beta-gala	3	1	1	1	1	0	0	0	1	0	0	0	0	1	0	0	0	1	0	0	0	0	1	0	0	0	1	0	0	0	0	1.8	1.8	1.8	62.498	551	551;527;646	1	-2
A0A087WPL5	ENSMUSG00000042699	13211	A0A087WPL5;O70133;O70133-3;A0A0R4J2C3;A0A087WRT3	A0A087WPL5;O70133;O70133-3	46;44;35;14;2	1;1;0;1;0	1;1;0;1;0	ATP-dependent RNA helicase A	Dhx9	tr|A0A087WPL5|A0A087WPL5_MOUSE DEAH box protein 9 OS=Mus musculus OX=10090 GN=Dhx9 PE=1 SV=1;sp|O70133|DHX9_MOUSE ATP-dependent RNA helicase A OS=Mus musculus OX=10090 GN=Dhx9 PE=1 SV=2;sp|O70133-3|DHX9_MOUSE Isoform 3 of ATP-dependent RNA helicase A OS=Mu	5	46	1	1	39	36	39	37	33	35	36	36	35	1	1	1	1	1	1	1	1	1	1	1	1	1	1	1	1	1	1	42.2	1.6	1.6	149.62	1383	1383;1380;1164;459;47	0	16.18
A0A087WQS2	ENSMUSG00000051223	66882	A0A087WQS2;Q9CQC6;A0A087WPF9;A0A087WS48	A0A087WQS2;Q9CQC6;A0A087WPF9	6;6;4;1	6;6;4;1	6;6;4;1	Basic leucine zipper and W2 domain-containing protein 1	Bzw1	tr|A0A087WQS2|A0A087WQS2_MOUSE Basic leucine zipper and W2 domain-containing protein 1 OS=Mus musculus OX=10090 GN=Bzw1 PE=1 SV=1;sp|Q9CQC6|BZW1_MOUSE Basic leucine zipper and W2 domain-containing protein 1 OS=Mus musculus OX=10090 GN=Bzw1 PE=1 SV=1;tr|A0A	4	6	6	6	1	4	1	1	0	0	1	1	3	1	4	1	1	0	0	1	1	3	1	4	1	1	0	0	1	1	3	13.5	13.5	13.5	51.209	451	451;419;253;105	0	10.125
A0A087WR13	ENSMUSG00000101337	100101919	A0A087WR13;A0A571BD48;L7N1Y0	A0A087WR13;A0A571BD48;L7N1Y0	2;1;1	2;1;1	2;1;1	dynein, axonemal, heavy chain 7C	Dnah7c;Dnah7b	tr|A0A087WR13|A0A087WR13_MOUSE Dynein, axonemal, heavy chain 7C OS=Mus musculus OX=10090 GN=Dnah7c PE=1 SV=1;tr|A0A571BD48|A0A571BD48_MOUSE Dynein, axonemal, heavy chain 7B OS=Mus musculus OX=10090 GN=Dnah7b PE=1 SV=1;tr|L7N1Y0|L7N1Y0_MOUSE Dynein, axonema	3	2	2	2	0	1	0	0	0	0	1	0	0	0	1	0	0	0	0	1	0	0	0	1	0	0	0	0	1	0	0	0.5	0.5	0.5	462.04	4024	4024;4024;4068	0.0057252	2.6885
A0A1D5RMG4	ENSMUSG00000023353	213990	A0A1D5RMG4;A0A0G2JDW1;A0A087WRF2;F8VQE9;Q8VHH5-2;Q8BXK8;Q8VHH5	A0A1D5RMG4;A0A0G2JDW1;A0A087WRF2;F8VQE9;Q8VHH5-2;Q8BXK8;Q8VHH5	1;1;1;1;1;1;1	1;1;1;1;1;1;1	1;1;1;1;1;1;1	Arf-GAP with GTPase, ANK repeat and PH domain-containing protein 3;Arf-GAP with GTPase, ANK repeat and PH domain-containing protein 1	Agap1;Agap3	tr|A0A1D5RMG4|A0A1D5RMG4_MOUSE Arf-GAP with GTPase, ANK repeat and PH domain-containing protein 3 OS=Mus musculus OX=10090 GN=Agap3 PE=1 SV=1;tr|A0A0G2JDW1|A0A0G2JDW1_MOUSE Arf-GAP with GTPase, ANK repeat and PH domain-containing protein 3 OS=Mus musculus	7	1	1	1	0	0	0	0	1	0	1	1	0	0	0	0	0	1	0	1	1	0	0	0	0	0	1	0	1	1	0	4	4	4	42.422	396	396;578;804;910;369;857;910	0.0086473	2.4999
D3Z5L4	ENSMUSG00000072763	77200	D3Z5L4;L7N248;A0A087WRH0;F8VPV1;L7N1Z0;A0A1B0GRI2;O88245;A2ARL5;A2ARX1;A2ARR7;A0A1B0GRI9;Q9JIC0;A2ART0;A2BFG5;F7AFE4;A0A0J9YVH3;A0A0J9YUD4;A0A1W2P6H7;A0A0U1RQ46;A2ARX0;A2ARW8;A2AE18;A0A087WSF4;E9Q981;A2AE19;A0A6I8MX21;A2BG91;A2ART4;A2AW67;F7AIG4;F8VPU8;A2ARW5;E9QA51;A2AHM2;A2ARV7;G3UY53;L7N246;A2AW66;A2ARR6;A2ARW1;Q3UT17;A2BFU4;Q4KL68;Q7TPX5;A0A087WRJ1;J3QPX0;A0A338P6Q3;Q6PEE4;Q3TPQ7;F7CEW8;A0A6I…	D3Z5L4;L7N248;A0A087WRH0;F8VPV1;L7N1Z0;A0A1B0GRI2;O88245;A2ARL5;A2ARX1;A2ARR7;A0A1B0GRI9;Q9JIC0;A2ART0;A2BFG5;F7AFE4;A0A0J9YVH3;A0A0J9YUD4;A0A1W2P6H7;A0A0U1RQ46;A2ARX0;A2ARW8;A2AE18;A0A087WSF4;E9Q981;A2AE19;A0A6I8MX21;A2BG91;A2ART4;A2AW67;F7AIG4;F8VPU8;A2ARW5;E9QA51;A2AHM2;A2ARV7;G3UY53;L7N246;A2AW66;A2ARR6;A2ARW1;Q3UT17;A2BFU4;Q4KL68;Q7TPX5;A0A087WRJ1;J3QPX0;A0A338P6Q3;Q6PEE4;Q3TPQ7;F7CEW8;A0A6I…	2;2;2;2;2;2;1;1;1;1;1;1;1;1;1;1;1;1;1;1;1;1;1;1;1;1;1;1;1;1;1;1;1;1;1;1;1;1;1;1;1;1;1;1;1;1;1;1;1;1;1;1;1	1;1;1;1;1;1;0;0;0;0;0;0;0;0;0;0;0;0;0;0;0;0;0;0;0;0;0;0;0;0;0;0;0;0;0;0;0;0;0;0;0;0;0;0;0;0;0;0;0;0;0;0;0	1;1;1;1;1;1;0;0;0;0;0;0;0;0;0;0;0;0;0;0;0;0;0;0;0;0;0;0;0;0;0;0;0;0;0;0;0;0;0;0;0;0;0;0;0;0;0;0;0;0;0;0;0	Zinc finger protein 182	5430403G16Rik;Gm6871;Zfp951;Gm10139;Gm14419;Gm14391;Gm14412;Zfp119a;Gm6710;Gm14326;Zfp433;Gm14443;Gm14399;Zfp182;9830147E19Rik;Gm14295;Gm14434;Gm14325;Gm10772;AU041133;Gm14393;Zfp931;Gm14401;Gm2381;Gm14322;Gm14418;Gm14410;5730507C01Rik;Gm14403;AI987944;2610044O15Rik8;Zfp933;AW146154;Gm4631;Znf182	tr|D3Z5L4|D3Z5L4_MOUSE RIKEN cDNA 5430403G16 gene OS=Mus musculus OX=10090 GN=5430403G16Rik PE=4 SV=1;tr|L7N248|L7N248_MOUSE Predicted gene 6871 OS=Mus musculus OX=10090 GN=Gm6871 PE=4 SV=1;tr|A0A087WRH0|A0A087WRH0_MOUSE Zinc finger protein 951 OS=Mus musc	53	2	1	1	1	1	1	1	1	1	2	2	1	0	0	0	0	0	0	1	1	0	0	0	0	0	0	0	1	1	0	6.7	2.2	2.2	77.408	667	667;545;451;451;438;571;57;582;522;526;540;545;554;554;599;498;600;600;609;610;610;627;635;636;663;822;834;498;498;85;497;187;270;298;303;305;357;358;358;370;392;402;403;406;410;416;439;468;468;497;858;497;627	0.0014493	4.217
A0A087WRI1	ENSMUSG00000026104	20846	A0A087WRI1;Q8CFQ1;Q99K94;Q8C3V4;A0A087WSP5;P42225	A0A087WRI1;Q8CFQ1;Q99K94;Q8C3V4;A0A087WSP5;P42225	1;1;1;1;1;1	1;1;1;1;1;1	1;1;1;1;1;1	Signal transducer and activator of transcription;Signal transducer and activator of transcription 1	Stat1	tr|A0A087WRI1|A0A087WRI1_MOUSE Signal transducer and activator of transcription 1 (Fragment) OS=Mus musculus OX=10090 GN=Stat1 PE=1 SV=1;tr|Q8CFQ1|Q8CFQ1_MOUSE Signal transducer and activator of transcription 1 (Fragment) OS=Mus musculus OX=10090 GN=Stat1	6	1	1	1	0	1	0	0	0	0	0	0	0	0	1	0	0	0	0	0	0	0	0	1	0	0	0	0	0	0	0	9.2	9.2	9.2	15.068	131	131;243;712;749;755;749	0.0069797	2.6596
A0A087WS46	ENSMUSG00000025967	55949	A0A087WS46;O70251;M0QWK5;M0QWH8;G3UX43;G3UZ47	A0A087WS46;O70251	4;4;1;1;1;1	2;2;1;1;1;1	2;2;1;1;1;1	Elongation factor 1-beta	Eef1b2;Eef1b	tr|A0A087WS46|A0A087WS46_MOUSE Eukaryotic translation elongation factor 1 beta 2 OS=Mus musculus OX=10090 GN=Eef1b2 PE=1 SV=1;sp|O70251|EF1B_MOUSE Elongation factor 1-beta OS=Mus musculus OX=10090 GN=Eef1b PE=1 SV=5	6	4	2	2	1	3	2	2	1	1	1	3	2	1	1	2	2	1	1	1	2	2	1	1	2	2	1	1	1	2	2	24.5	17.9	17.9	20.136	184	184;225;43;48;68;94	0	19.113
S4R294	ENSMUSG00000040225	226562	S4R294;S4R2J9;A0A0A0MQ79;Q3TLH4-5;Q3TLH4;S4R209;S4R2L9;S4R2E2;S4R298	S4R294;S4R2J9;A0A0A0MQ79;Q3TLH4-5;Q3TLH4;S4R209	19;19;19;19;19;10;6;2;1	19;19;19;19;19;10;6;2;1	19;19;19;19;19;10;6;2;1	Protein PRRC2C	Prrc2c	tr|S4R294|S4R294_MOUSE Protein PRRC2C OS=Mus musculus OX=10090 GN=Prrc2c PE=1 SV=1;tr|S4R2J9|S4R2J9_MOUSE Protein PRRC2C OS=Mus musculus OX=10090 GN=Prrc2c PE=1 SV=1;tr|A0A0A0MQ79|A0A0A0MQ79_MOUSE Protein PRRC2C OS=Mus musculus OX=10090 GN=Prrc2c PE=1 SV=1	9	19	19	19	7	4	9	10	10	6	9	6	10	7	4	9	10	10	6	9	6	10	7	4	9	10	10	6	9	6	10	9.4	9.4	9.4	298.11	2724	2724;2765;2844;2767;2846;1515;1276;564;149	0	53.368
A0A0A0MQ80	ENSMUSG00000027722	57815	A0A0A0MQ80;Q3UMC0;A0A0G2JFY0;D3Z0U5;D6RGM7;D3Z4J2;Q9D3R6-3;Q9D3R6	A0A0A0MQ80;Q3UMC0;A0A0G2JFY0	27;27;26;1;1;1;1;1	27;27;26;1;1;1;1;1	27;27;26;1;1;1;1;1	Spermatogenesis-associated protein 5	Spata5	tr|A0A0A0MQ80|A0A0A0MQ80_MOUSE Vesicle-fusing ATPase OS=Mus musculus OX=10090 GN=Spata5 PE=1 SV=1;sp|Q3UMC0|AFG2H_MOUSE ATPase family protein 2 homolog OS=Mus musculus OX=10090 GN=Spata5 PE=1 SV=2;tr|A0A0G2JFY0|A0A0G2JFY0_MOUSE ATPase family protein 2 homo	8	27	27	27	19	18	19	22	16	18	21	22	21	19	18	19	22	16	18	21	22	21	19	18	19	22	16	18	21	22	21	40.4	40.4	40.4	97.156	892	892;893;842;277;372;495;409;539	0	261.28
A0A0A0MQ97	ENSMUSG00000047586	233038	A0A0A0MQ97;G3X9C2	A0A0A0MQ97;G3X9C2	2;2	2;2	2;2	F-box only protein 50	Nccrp1	tr|A0A0A0MQ97|A0A0A0MQ97_MOUSE F-box only protein 50 OS=Mus musculus OX=10090 GN=Nccrp1 PE=1 SV=1;sp|G3X9C2|FBX50_MOUSE F-box only protein 50 OS=Mus musculus OX=10090 GN=Nccrp1 PE=1 SV=2	2	2	2	2	2	2	1	1	1	2	1	1	1	2	2	1	1	1	2	1	1	1	2	2	1	1	1	2	1	1	1	7.6	7.6	7.6	33.027	291	291;266	0	7.3946
A0A0A0MQA5	ENSMUSG00000026202	22145	A0A0A0MQA5;P68368;A0A087WQS4;A0A087WRB4;A0A087WSB0;A0A087WSL5;A0A087WS35	A0A0A0MQA5;P68368	19;19;5;4;3;3;1	4;4;3;2;2;2;1	4;4;3;2;2;2;1	Tubulin alpha-4A chain	Tuba4a	tr|A0A0A0MQA5|A0A0A0MQA5_MOUSE Tubulin alpha chain (Fragment) OS=Mus musculus OX=10090 GN=Tuba4a PE=1 SV=1;sp|P68368|TBA4A_MOUSE Tubulin alpha-4A chain OS=Mus musculus OX=10090 GN=Tuba4a PE=1 SV=1	7	19	4	4	13	18	14	14	12	12	14	15	14	0	4	2	2	0	0	2	3	2	0	4	2	2	0	0	2	3	2	53.2	11.3	11.3	52.793	477	477;448;125;100;81;89;75	0	18.899
A0A0A0MQF6	ENSMUSG00000057666	14433	A0A0A0MQF6;P16858;S4R257;S4R1W1;A0A1D5RLD8;S4R1W8;S4R1N5;V9GXA7	A0A0A0MQF6;P16858;S4R257;S4R1W1;A0A1D5RLD8	10;10;9;9;9;1;1;1	10;10;9;9;9;1;1;1	8;8;7;7;8;1;1;1	Glyceraldehyde-3-phosphate dehydrogenase	Gapdh;Gm3839	tr|A0A0A0MQF6|A0A0A0MQF6_MOUSE Glyceraldehyde-3-phosphate dehydrogenase OS=Mus musculus OX=10090 GN=Gapdh PE=1 SV=1;sp|P16858|G3P_MOUSE Glyceraldehyde-3-phosphate dehydrogenase OS=Mus musculus OX=10090 GN=Gapdh PE=1 SV=2;tr|S4R257|S4R257_MOUSE Glyceraldehy	8	10	10	8	8	10	8	8	9	8	10	10	8	8	10	8	8	9	8	10	10	8	7	8	7	7	7	7	8	8	7	37.9	37.9	32	38.653	359	359;333;280;333;333;55;57;121	0	93.544
A0A0A0MQM0	ENSMUSG00000078812	276770	A0A0A0MQM0;P63242;Q8BGY2;J3QPS8	A0A0A0MQM0;P63242;Q8BGY2	5;5;4;1	5;5;4;1	5;5;4;1	Eukaryotic translation initiation factor 5A;Eukaryotic translation initiation factor 5A-1;Eukaryotic translation initiation factor 5A-2	Eif5a;Eif5a2	tr|A0A0A0MQM0|A0A0A0MQM0_MOUSE Eukaryotic translation initiation factor 5A (Fragment) OS=Mus musculus OX=10090 GN=Eif5a PE=1 SV=1;sp|P63242|IF5A1_MOUSE Eukaryotic translation initiation factor 5A-1 OS=Mus musculus OX=10090 GN=Eif5a PE=1 SV=2;sp|Q8BGY2|IF5A	4	5	5	5	4	4	5	4	4	2	4	5	4	4	4	5	4	4	2	4	5	4	4	4	5	4	4	2	4	5	4	30.9	30.9	30.9	16.302	149	149;154;153;76	0	20.586
A0A0A6YVU8	ENSMUSG00000042165	100043022	A0A0A6YVU8;Q9JKV1	A0A0A6YVU8;Q9JKV1	1;1	1;1	1;1	Proteasomal ubiquitin receptor ADRM1	Gm9774;Adrm1	tr|A0A0A6YVU8|A0A0A6YVU8_MOUSE Predicted pseudogene 9774 OS=Mus musculus OX=10090 GN=Gm9774 PE=3 SV=1;sp|Q9JKV1|ADRM1_MOUSE Proteasomal ubiquitin receptor ADRM1 OS=Mus musculus OX=10090 GN=Adrm1 PE=1 SV=2	2	1	1	1	1	0	0	0	0	0	0	0	0	1	0	0	0	0	0	0	0	0	1	0	0	0	0	0	0	0	0	3.9	3.9	3.9	42.147	407	407;407	0.0014134	3.8301
D3YVN1	ENSMUSG00000027671	56456	D3YVN1;A0A0A6YWG8;Q9Z2N8	D3YVN1;A0A0A6YWG8;Q9Z2N8	1;1;1	1;1;1	1;1;1	Actin-like protein 6A	Actl6a	tr|D3YVN1|D3YVN1_MOUSE Actin-like protein 6A (Fragment) OS=Mus musculus OX=10090 GN=Actl6a PE=1 SV=1;tr|A0A0A6YWG8|A0A0A6YWG8_MOUSE Actin-like protein 6A (Fragment) OS=Mus musculus OX=10090 GN=Actl6a PE=1 SV=1;sp|Q9Z2N8|ACL6A_MOUSE Actin-like protein 6A OS	3	1	1	1	0	0	0	1	0	0	0	0	0	0	0	0	1	0	0	0	0	0	0	0	0	1	0	0	0	0	0	14.7	14.7	14.7	23.122	204	204;245;429	0	16.444
A0A0A6YWX6	ENSMUSG00000025651	22273	A0A0A6YWX6;Q9CZ13	A0A0A6YWX6;Q9CZ13	1;1	1;1	1;1	Cytochrome b-c1 complex subunit 1, mitochondrial	Uqcrc1	tr|A0A0A6YWX6|A0A0A6YWX6_MOUSE Cytochrome b-c1 complex subunit 1, mitochondrial (Fragment) OS=Mus musculus OX=10090 GN=Uqcrc1 PE=1 SV=1;sp|Q9CZ13|QCR1_MOUSE Cytochrome b-c1 complex subunit 1, mitochondrial OS=Mus musculus OX=10090 GN=Uqcrc1 PE=1 SV=2	2	1	1	1	0	1	0	0	0	0	0	0	0	0	1	0	0	0	0	0	0	0	0	1	0	0	0	0	0	0	0	11.7	11.7	11.7	17.463	162	162;480	0.0014104	3.794
A0A0A6YXF6	ENSMUSG00000007815	11848	A0A0A6YXF6;Q9QUI0;A0A0A6YWJ1;A0A0G2JEP8;H3BL56;Q9CR99;Q62159	A0A0A6YXF6;Q9QUI0	3;3;1;1;1;1;1	3;3;1;1;1;1;1	3;3;1;1;1;1;1	Transforming protein RhoA	Rhoa	tr|A0A0A6YXF6|A0A0A6YXF6_MOUSE Transforming protein RhoA (Fragment) OS=Mus musculus OX=10090 GN=Rhoa PE=1 SV=1;sp|Q9QUI0|RHOA_MOUSE Transforming protein RhoA OS=Mus musculus OX=10090 GN=Rhoa PE=1 SV=1	7	3	3	3	0	3	0	0	0	0	0	0	0	0	3	0	0	0	0	0	0	0	0	3	0	0	0	0	0	0	0	13.9	13.9	13.9	18.71	165	165;193;67;118;149;193;193	0	5.6326
A0A0B4J1E2	ENSMUSG00000021039	66354	A0A0B4J1E2;Q9CSN1	A0A0B4J1E2;Q9CSN1	10;10	10;10	10;10	SNW domain-containing protein 1	Snw1	tr|A0A0B4J1E2|A0A0B4J1E2_MOUSE SNW domain-containing protein 1 OS=Mus musculus OX=10090 GN=Snw1 PE=1 SV=1;sp|Q9CSN1|SNW1_MOUSE SNW domain-containing protein 1 OS=Mus musculus OX=10090 GN=Snw1 PE=1 SV=3	2	10	10	10	7	4	7	3	3	4	1	4	5	7	4	7	3	3	4	1	4	5	7	4	7	3	3	4	1	4	5	23.9	23.9	23.9	61.461	536	536;536	0	34.564
A0A0G2JDL9	ENSMUSG00000068798	109905	A0A0G2JDL9;Q99JI6;P62835;A0A1W2P777;A0A0G2JED9;A0A0G2JE52	A0A0G2JDL9;Q99JI6;P62835;A0A1W2P777;A0A0G2JED9;A0A0G2JE52	2;2;2;1;1;1	2;2;2;1;1;1	2;2;2;1;1;1	Ras-related protein Rap-1b;Ras-related protein Rap-1A	Rap1b;Rap1a	tr|A0A0G2JDL9|A0A0G2JDL9_MOUSE Ras-related protein Rap-1A OS=Mus musculus OX=10090 GN=Rap1a PE=1 SV=1;sp|Q99JI6|RAP1B_MOUSE Ras-related protein Rap-1b OS=Mus musculus OX=10090 GN=Rap1b PE=1 SV=2;sp|P62835|RAP1A_MOUSE Ras-related protein Rap-1A OS=Mus muscu	6	2	2	2	0	2	0	0	0	0	0	0	0	0	2	0	0	0	0	0	0	0	0	2	0	0	0	0	0	0	0	19.5	19.5	19.5	13.426	118	118;184;184;53;109;159	0.0014045	3.7161
A0A0G2JDV8	ENSMUSG00000053931	71994	A0A0G2JDV8;Q9DAW9	A0A0G2JDV8;Q9DAW9	2;2	2;2	2;2	Calponin-3	Cnn3	tr|A0A0G2JDV8|A0A0G2JDV8_MOUSE Calponin OS=Mus musculus OX=10090 GN=Cnn3 PE=1 SV=1;sp|Q9DAW9|CNN3_MOUSE Calponin-3 OS=Mus musculus OX=10090 GN=Cnn3 PE=1 SV=1	2	2	2	2	0	0	1	0	0	0	0	0	1	0	0	1	0	0	0	0	0	1	0	0	1	0	0	0	0	0	1	7.4	7.4	7.4	31.395	284	284;330	0.003251	2.8787
A0A0G2JDW7	ENSMUSG00000090733	57294	A0A0G2JDW7;Q6ZWU9;A0A0G2JG29;A0A0G2JEX7	A0A0G2JDW7;Q6ZWU9;A0A0G2JG29	3;3;2;1	3;3;2;1	2;2;2;0	40S ribosomal protein S27	Rps27	tr|A0A0G2JDW7|A0A0G2JDW7_MOUSE 40S ribosomal protein S27 (Fragment) OS=Mus musculus OX=10090 GN=Rps27 PE=1 SV=1;sp|Q6ZWU9|RS27_MOUSE 40S ribosomal protein S27 OS=Mus musculus OX=10090 GN=Rps27 PE=1 SV=3;tr|A0A0G2JG29|A0A0G2JG29_MOUSE 40S ribosomal protein	4	3	3	2	2	3	2	2	2	2	3	2	2	2	3	2	2	2	2	3	2	2	1	2	1	1	1	1	2	1	1	24.4	24.4	14.6	9.2327	82	82;84;83;52	0	15.661
A0A0G2JDZ9	ENSMUSG00000055204	81702	A0A0G2JDZ9;E9Q804;Q99NH0;E9QKG6;A0A1W2P6X1;Q99NH0-3;Q99NH0-2;F7C545;F7DD37;F6YYD3;F6SI14	A0A0G2JDZ9;E9Q804;Q99NH0;E9QKG6;A0A1W2P6X1;Q99NH0-3;Q99NH0-2	23;23;23;22;20;20;19;2;1;1;1	23;23;23;22;20;20;19;2;1;1;1	14;14;14;13;11;11;10;0;0;0;0	Ankyrin repeat domain-containing protein 17	Ankrd17	tr|A0A0G2JDZ9|A0A0G2JDZ9_MOUSE Ankyrin repeat domain-containing protein 17 OS=Mus musculus OX=10090 GN=Ankrd17 PE=1 SV=1;tr|E9Q804|E9Q804_MOUSE Ankyrin repeat domain-containing protein 17 OS=Mus musculus OX=10090 GN=Ankrd17 PE=1 SV=3;sp|Q99NH0|ANR17_MOUSE	11	23	23	14	11	8	10	16	11	11	13	14	15	11	8	10	16	11	11	13	14	15	7	5	7	8	8	7	6	8	8	11.9	11.9	7.6	263.66	2494	2494;2602;2603;2352;1600;1599;1330;214;91;111;219	0	86.645
A0A0G2JE27	ENSMUSG00000070372	12340	A0A0G2JE27;Q5RKN9;P47753	A0A0G2JE27;Q5RKN9;P47753	3;3;3	3;3;3	2;2;2	F-actin-capping protein subunit alpha-1	Capza1	tr|A0A0G2JE27|A0A0G2JE27_MOUSE F-actin-capping protein subunit alpha (Fragment) OS=Mus musculus OX=10090 GN=Capza1 PE=1 SV=4;tr|Q5RKN9|Q5RKN9_MOUSE F-actin-capping protein subunit alpha OS=Mus musculus OX=10090 GN=Capza1 PE=1 SV=1;sp|P47753|CAZA1_MOUSE F-a	3	3	3	2	0	3	0	0	0	0	0	0	0	0	3	0	0	0	0	0	0	0	0	2	0	0	0	0	0	0	0	42.9	42.9	33.9	13.098	112	112;286;286	0	13.025
A0A494BAN1	ENSMUSG00000091896	56550	A0A494BAN1;A0A494BA56;A0A0G2JE32;A0A0G2JGL0;P62838;P61079;Q6ZWY6;P61080	A0A494BAN1;A0A494BA56;A0A0G2JE32;A0A0G2JGL0;P62838;P61079;Q6ZWY6;P61080	2;2;2;2;2;2;1;1	2;2;2;2;2;2;1;1	2;2;2;2;2;2;1;1	Ubiquitin-conjugating enzyme E2 D2;Ubiquitin-conjugating enzyme E2 D3;Ubiquitin-conjugating enzyme E2 D2B;Ubiquitin-conjugating enzyme E2 D1	Ube2d2;Ube2d3;Ube2d2b;Ube2d1	tr|A0A494BAN1|A0A494BAN1_MOUSE Ubiquitin-conjugating enzyme E2D 2A (Fragment) OS=Mus musculus OX=10090 GN=Ube2d2a PE=1 SV=1;tr|A0A494BA56|A0A494BA56_MOUSE Ubiquitin-conjugating enzyme E2D 2A (Fragment) OS=Mus musculus OX=10090 GN=Ube2d2a PE=1 SV=1;tr|A0A0G	8	2	2	2	0	1	0	0	0	0	0	1	1	0	1	0	0	0	0	0	1	1	0	1	0	0	0	0	0	1	1	31.5	31.5	31.5	10.508	92	92;93;132;148;147;147;147;147	0	5.674
A0A0G2JEA9	ENSMUSG00000038374	60365	A0A0G2JEA9;A0A0G2JFX7;Q9CWZ3-2;Q9CWZ3;A0A0N4SUH6	A0A0G2JEA9;A0A0G2JFX7;Q9CWZ3-2;Q9CWZ3;A0A0N4SUH6	3;3;3;3;2	3;3;3;3;2	3;3;3;3;2	RNA-binding protein 8A	Rbm8a	tr|A0A0G2JEA9|A0A0G2JEA9_MOUSE RNA-binding protein 8A OS=Mus musculus OX=10090 GN=Rbm8a PE=1 SV=1;tr|A0A0G2JFX7|A0A0G2JFX7_MOUSE RNA-binding protein 8A OS=Mus musculus OX=10090 GN=Rbm8a PE=1 SV=1;sp|Q9CWZ3-2|RBM8A_MOUSE Isoform 2 of RNA-binding protein 8A	5	3	3	3	3	3	3	2	1	1	2	2	1	3	3	3	2	1	1	2	2	1	3	3	3	2	1	1	2	2	1	28.8	28.8	28.8	14.502	125	125;171;173;174;174	0	8.9731
Q9CRA2	ENSMUSG00000028273	56376	Q9CRA2;D9J303;F8WJI6;E9Q8P5;A0A0G2JEJ0;D9J2Z9;D9J300;D9J301;D9J302;Q8CI51-3;Q8CI51-2;Q8CI51	Q9CRA2;D9J303;F8WJI6;E9Q8P5;A0A0G2JEJ0;D9J2Z9;D9J300;D9J301;D9J302;Q8CI51-3;Q8CI51-2;Q8CI51	1;1;1;1;1;1;1;1;1;1;1;1	1;1;1;1;1;1;1;1;1;1;1;1	1;1;1;1;1;1;1;1;1;1;1;1	PDZ and LIM domain protein 5	Pdlim5	tr|Q9CRA2|Q9CRA2_MOUSE PDZ and LIM domain protein 5 OS=Mus musculus OX=10090 GN=Pdlim5 PE=1 SV=1;tr|D9J303|D9J303_MOUSE ENH isoform 3a OS=Mus musculus OX=10090 GN=Pdlim5 PE=1 SV=1;tr|F8WJI6|F8WJI6_MOUSE PDZ and LIM domain protein 5 OS=Mus musculus OX=10090	12	1	1	1	0	1	0	0	0	0	0	0	0	0	1	0	0	0	0	0	0	0	0	1	0	0	0	0	0	0	0	5.1	5.1	5.1	23.793	214	214;234;239;239;253;482;526;574;614;239;337;591	0.0069095	2.6062
A0A0G2JEM7	ENSMUSG00000039682	66988	A0A0G2JEM7;Q9CPY7-2;Q9CPY7	A0A0G2JEM7;Q9CPY7-2;Q9CPY7	1;1;1	1;1;1	1;1;1	Cytosol aminopeptidase	Lap3	tr|A0A0G2JEM7|A0A0G2JEM7_MOUSE Cytosol aminopeptidase (Fragment) OS=Mus musculus OX=10090 GN=Lap3 PE=1 SV=1;sp|Q9CPY7-2|AMPL_MOUSE Isoform 2 of Cytosol aminopeptidase OS=Mus musculus OX=10090 GN=Lap3;sp|Q9CPY7|AMPL_MOUSE Cytosol aminopeptidase OS=Mus muscu	3	1	1	1	0	1	0	0	0	0	0	0	0	0	1	0	0	0	0	0	0	0	0	1	0	0	0	0	0	0	0	11.2	11.2	11.2	11.864	107	107;488;519	0.0069182	2.6143
A0A0G2JER9	ENSMUSG00000029131	23950	A0A0G2JER9;O54946-2;O54946;A0A087WP03;F6YRQ2;G3X8S5;Q9QYI5-2;Q9QYI5-1;Q9QYI5	A0A0G2JER9;O54946-2;O54946;A0A087WP03;F6YRQ2;G3X8S5;Q9QYI5-2;Q9QYI5-1;Q9QYI5	2;2;2;1;1;1;1;1;1	2;2;2;1;1;1;1;1;1	2;2;2;1;1;1;1;1;1	DnaJ homolog subfamily B member 6;DnaJ homolog subfamily B member 2	Dnajb6;Dnajb2	tr|A0A0G2JER9|A0A0G2JER9_MOUSE DnaJ homolog subfamily B member 6 OS=Mus musculus OX=10090 GN=Dnajb6 PE=1 SV=1;sp|O54946-2|DNJB6_MOUSE Isoform B of DnaJ homolog subfamily B member 6 OS=Mus musculus OX=10090 GN=Dnajb6;sp|O54946|DNJB6_MOUSE DnaJ homolog subfa	9	2	2	2	1	2	2	2	0	1	0	1	1	1	2	2	2	0	1	0	1	1	1	2	2	2	0	1	0	1	1	9.5	9.5	9.5	26.998	243	243;242;365;110;231;261;259;277;324	0	4.8681
A0A0G2JEU1	ENSMUSG00000029455	11669	A0A0G2JEU1;P47738;A0A0G2JFQ0;D3YYF3;A0A0G2JF60	A0A0G2JEU1;P47738;A0A0G2JFQ0	5;5;3;2;1	5;5;3;2;1	5;5;3;2;1	Aldehyde dehydrogenase, mitochondrial	Aldh2	tr|A0A0G2JEU1|A0A0G2JEU1_MOUSE Aldehyde dehydrogenase, mitochondrial OS=Mus musculus OX=10090 GN=Aldh2 PE=1 SV=1;sp|P47738|ALDH2_MOUSE Aldehyde dehydrogenase, mitochondrial OS=Mus musculus OX=10090 GN=Aldh2 PE=1 SV=1;tr|A0A0G2JFQ0|A0A0G2JFQ0_MOUSE Aldehyde	5	5	5	5	0	5	0	0	0	0	0	0	0	0	5	0	0	0	0	0	0	0	0	5	0	0	0	0	0	0	0	12.3	12.3	12.3	51.349	471	471;519;229;185;196	0	42.901
A0A0G2JGI2	ENSMUSG00000029177	12615	A0A0G2JGI2;A0A0G2JEV2;O35216	A0A0G2JGI2;A0A0G2JEV2;O35216	2;2;2	2;2;2	2;2;2	Histone H3-like centromeric protein A	Cenpa	tr|A0A0G2JGI2|A0A0G2JGI2_MOUSE Histone H3-like centromeric protein A (Fragment) OS=Mus musculus OX=10090 GN=Cenpa PE=1 SV=1;tr|A0A0G2JEV2|A0A0G2JEV2_MOUSE Histone H3-like centromeric protein A OS=Mus musculus OX=10090 GN=Cenpa PE=1 SV=1;sp|O35216|CENPA_MOU	3	2	2	2	2	2	2	2	2	2	2	2	2	2	2	2	2	2	2	2	2	2	2	2	2	2	2	2	2	2	2	18.2	18.2	18.2	11.552	99	99;130;134	0	6.7232
Q8R344	ENSMUSG00000019659	72654	Q8R344;A0A0G2JF16;A0A0G2JFK6	Q8R344;A0A0G2JF16	3;3;1	3;3;1	3;3;1	Coiled-coil domain-containing protein 12	Ccdc12	sp|Q8R344|CCD12_MOUSE Coiled-coil domain-containing protein 12 OS=Mus musculus OX=10090 GN=Ccdc12 PE=1 SV=2;tr|A0A0G2JF16|A0A0G2JF16_MOUSE Coiled-coil domain-containing protein 12 (Fragment) OS=Mus musculus OX=10090 GN=Ccdc12 PE=1 SV=1	3	3	3	3	1	1	1	1	0	2	1	1	2	1	1	1	1	0	2	1	1	2	1	1	1	1	0	2	1	1	2	23.5	23.5	23.5	18.891	166	166;142;88	0	10.779
A0A0G2JFK2	ENSMUSG00000028034	51886	A0A0G2JFK2;A0A0G2JG00;Q3TUE1;A0A0G2JGW9;A0A0G2JFY5;Q3UUU2;Q91WJ8;Q91WJ8-2	A0A0G2JFK2;A0A0G2JG00;Q3TUE1;A0A0G2JGW9;A0A0G2JFY5;Q3UUU2;Q91WJ8;Q91WJ8-2	1;1;1;1;1;1;1;1	1;1;1;1;1;1;1;1	1;1;1;1;1;1;1;1	Far upstream element-binding protein 1	Fubp1	tr|A0A0G2JFK2|A0A0G2JFK2_MOUSE Far upstream element-binding protein 1 (Fragment) OS=Mus musculus OX=10090 GN=Fubp1 PE=1 SV=1;tr|A0A0G2JG00|A0A0G2JG00_MOUSE Far upstream element-binding protein 1 OS=Mus musculus OX=10090 GN=Fubp1 PE=1 SV=1;tr|Q3TUE1|Q3TUE1_	8	1	1	1	0	1	0	0	0	0	0	0	0	0	1	0	0	0	0	0	0	0	0	1	0	0	0	0	0	0	0	4.2	4.2	4.2	32.445	306	306;523;642;643;654;700;651;672	0	5.3762
A0A0G2JFK7	ENSMUSG00000029465	56378	A0A0G2JFK7;D3Z2F7;D3Z2F8;H7BWZ3;Q9JM76	A0A0G2JFK7;D3Z2F7;D3Z2F8;H7BWZ3;Q9JM76	1;1;1;1;1	1;1;1;1;1	1;1;1;1;1	Actin-related protein 2/3 complex subunit 3	Arpc3	tr|A0A0G2JFK7|A0A0G2JFK7_MOUSE Actin-related protein 2/3 complex subunit 3 (Fragment) OS=Mus musculus OX=10090 GN=Arpc3 PE=1 SV=1;tr|D3Z2F7|D3Z2F7_MOUSE Actin-related protein 2/3 complex subunit 3 OS=Mus musculus OX=10090 GN=Arpc3 PE=1 SV=1;tr|D3Z2F8|D3Z2F	5	1	1	1	0	1	0	0	0	0	0	0	0	0	1	0	0	0	0	0	0	0	0	1	0	0	0	0	0	0	0	9.2	9.2	9.2	16.282	142	142;161;163;170;178	0.0019672	2.945
A0A0G2JGQ4	ENSMUSG00000028954	53312	A0A0G2JGQ4;P54729	A0A0G2JGQ4;P54729	2;2	2;2	2;2	NEDD8 ultimate buster 1	Nub1	tr|A0A0G2JGQ4|A0A0G2JGQ4_MOUSE NEDD8 ultimate buster 1 OS=Mus musculus OX=10090 GN=Nub1 PE=1 SV=1;sp|P54729|NUB1_MOUSE NEDD8 ultimate buster 1 OS=Mus musculus OX=10090 GN=Nub1 PE=1 SV=2	2	2	2	2	1	0	0	1	0	1	0	1	2	1	0	0	1	0	1	0	1	2	1	0	0	1	0	1	0	1	2	3.8	3.8	3.8	73.116	638	638;614	0	4.8083
E9Q5A3	ENSMUSG00000036893	77683	E9Q5A3;Z4YJZ7;A0A0H2UH19;Q5DW34-2;Q5DW34-3;Q5DW34;A0A0A6YWA0	E9Q5A3;Z4YJZ7;A0A0H2UH19;Q5DW34-2;Q5DW34-3;Q5DW34;A0A0A6YWA0	4;4;4;4;4;4;2	3;3;3;3;3;3;2	3;3;3;3;3;3;2	Histone-lysine N-methyltransferase EHMT1	Ehmt1	tr|E9Q5A3|E9Q5A3_MOUSE Histone-lysine N-methyltransferase EHMT1 OS=Mus musculus OX=10090 GN=Ehmt1 PE=1 SV=2;tr|Z4YJZ7|Z4YJZ7_MOUSE Histone-lysine N-methyltransferase EHMT1 OS=Mus musculus OX=10090 GN=Ehmt1 PE=1 SV=2;tr|A0A0H2UH19|A0A0H2UH19_MOUSE Histone-l	7	4	3	3	1	1	1	2	1	1	0	0	0	1	0	1	2	1	0	0	0	0	1	0	1	2	1	0	0	0	0	4.6	3.8	3.8	136.66	1248	1248;1288;1289;1243;1248;1296;203	0	5.2082
A0A0J9YTU9	ENSMUSG00000062761	269639	A0A0J9YTU9;Q69Z99;A0A0J9YV10;A0A0J9YTW0;A0A0J9YU29	A0A0J9YTU9;Q69Z99	13;13;5;4;1	13;13;5;4;1	13;13;5;4;1	Zinc finger protein 512	Znf512	tr|A0A0J9YTU9|A0A0J9YTU9_MOUSE Zinc finger protein 512 OS=Mus musculus OX=10090 GN=Zfp512 PE=1 SV=1;sp|Q69Z99|ZN512_MOUSE Zinc finger protein 512 OS=Mus musculus OX=10090 GN=Znf512 PE=2 SV=2	5	13	13	13	11	10	10	10	11	10	7	9	9	11	10	10	10	11	10	7	9	9	11	10	10	10	11	10	7	9	9	34.6	34.6	34.6	57.639	506	506;562;226;222;72	0	91.507
Q3U6F1	ENSMUSG00000039191	19664	Q3U6F1;E9Q7W0;A0A0J9YTV5;P31266-2;P31266	Q3U6F1;E9Q7W0;A0A0J9YTV5;P31266-2;P31266	4;4;4;4;4	4;4;4;4;4	4;4;4;4;4	Recombining binding protein suppressor of hairless	Rbpj	tr|Q3U6F1|Q3U6F1_MOUSE Recombining-binding protein suppressor of hairless OS=Mus musculus OX=10090 GN=Rbpj PE=1 SV=1;tr|E9Q7W0|E9Q7W0_MOUSE Recombining-binding protein suppressor of hairless OS=Mus musculus OX=10090 GN=Rbpj PE=1 SV=1;tr|A0A0J9YTV5|A0A0J9YT	5	4	4	4	1	0	0	3	0	1	0	2	2	1	0	0	3	0	1	0	2	2	1	0	0	3	0	1	0	2	2	10.8	10.8	10.8	51.926	465	465;485;507;487;526	0	7.3319
A0A0J9YUD8	ENSMUSG00000066551	15289	A0A0J9YUD8;A0A0J9YUZ4;P63158;D3YVC6;D3YZ18	A0A0J9YUD8;A0A0J9YUZ4;P63158	4;4;4;1;1	4;4;4;1;1	4;4;4;1;1	High mobility group protein B1	Hmgb1	tr|A0A0J9YUD8|A0A0J9YUD8_MOUSE High mobility group protein B1 OS=Mus musculus OX=10090 GN=Hmgb1 PE=1 SV=1;tr|A0A0J9YUZ4|A0A0J9YUZ4_MOUSE High mobility group protein 1 (Fragment) OS=Mus musculus OX=10090 GN=Hmgb1 PE=1 SV=1;sp|P63158|HMGB1_MOUSE High mobilit	5	4	4	4	1	3	1	3	1	0	1	0	3	1	3	1	3	1	0	1	0	3	1	3	1	3	1	0	1	0	3	25.7	25.7	25.7	19.774	171	171;211;215;92;124	0	20.944
A0A0J9YUS5	ENSMUSG00000045983	208643	A0A0J9YUS5;E9PVC6;Q6NZJ6;E9PVC5;Q6NZJ6-2;E9Q9E1;A0A0J9YUC1;A0A0J9YVC1;E9Q770;A2AMI7;Z4YKC4;A0A0N4SVL0;A0A0R4J112;Q80XI3-2;A2AMI2;Q80XI3;Q80XI3-3;Q80XI3-4	A0A0J9YUS5;E9PVC6;Q6NZJ6;E9PVC5;Q6NZJ6-2;E9Q9E1;A0A0J9YUC1;A0A0J9YVC1;E9Q770	9;9;9;9;9;9;5;5;5;1;1;1;1;1;1;1;1;1	9;9;9;9;9;9;5;5;5;1;1;1;1;1;1;1;1;1	9;9;9;9;9;9;5;5;5;1;1;1;1;1;1;1;1;1	Eukaryotic translation initiation factor 4 gamma 1	Eif4g1	tr|A0A0J9YUS5|A0A0J9YUS5_MOUSE Eukaryotic translation initiation factor 4 gamma 1 OS=Mus musculus OX=10090 GN=Eif4g1 PE=1 SV=1;tr|E9PVC6|E9PVC6_MOUSE Eukaryotic translation initiation factor 4 gamma 1 OS=Mus musculus OX=10090 GN=Eif4g1 PE=1 SV=1;sp|Q6NZJ6|	18	9	9	9	0	6	2	1	0	2	1	2	5	0	6	2	1	0	2	1	2	5	0	6	2	1	0	2	1	2	5	8.5	8.5	8.5	145.31	1303	1303;1553;1600;1594;1586;1593;900;795;958;1002;1567;1762;1578;1560;1579;1579;1590;1578	0	24.643
A0A0J9YV20	ENSMUSG00000029415	231452	A0A0J9YV20;A0A0R4J0B7;Q80UZ2-2;Q80UZ2;Q80UZ2-3;A0A0J9YU58	A0A0J9YV20;A0A0R4J0B7;Q80UZ2-2;Q80UZ2;Q80UZ2-3	3;3;3;3;2;1	3;3;3;3;2;1	3;3;3;3;2;1	Protein SDA1 homolog	Sdad1	tr|A0A0J9YV20|A0A0J9YV20_MOUSE Protein SDA1 OS=Mus musculus OX=10090 GN=Sdad1 PE=1 SV=1;tr|A0A0R4J0B7|A0A0R4J0B7_MOUSE Protein SDA1 OS=Mus musculus OX=10090 GN=Sdad1 PE=1 SV=1;sp|Q80UZ2-2|SDA1_MOUSE Isoform 2 of Protein SDA1 homolog OS=Mus musculus OX=1009	6	3	3	3	1	1	2	1	1	2	2	3	3	1	1	2	1	1	2	2	3	3	1	1	2	1	1	2	2	3	3	4.8	4.8	4.8	79.458	686	686;687;686;687;239;64	0	10.18
A0A0J9YV96	ENSMUSG00000029147	14208	A0A0J9YV96;Q61074;A0A0J9YUB0;A0A0J9YVG0	A0A0J9YV96;Q61074;A0A0J9YUB0;A0A0J9YVG0	2;2;1;1	2;2;1;1	2;2;1;1	Protein phosphatase 1G	Ppm1g	tr|A0A0J9YV96|A0A0J9YV96_MOUSE Protein phosphatase 1G (Fragment) OS=Mus musculus OX=10090 GN=Ppm1g PE=1 SV=1;sp|Q61074|PPM1G_MOUSE Protein phosphatase 1G OS=Mus musculus OX=10090 GN=Ppm1g PE=1 SV=3;tr|A0A0J9YUB0|A0A0J9YUB0_MOUSE Protein phosphatase 1G (Fra	4	2	2	2	1	1	0	0	0	0	0	0	1	1	1	0	0	0	0	0	0	1	1	1	0	0	0	0	0	0	1	17	17	17	20.928	194	194;542;230;435	0.002	3.1093
A0A0N4SUH4	ENSMUSG00000041360	52874	A0A0N4SUH4;Q8BKS9;A0A494BBI7;A0A494BB98	A0A0N4SUH4;Q8BKS9;A0A494BBI7	24;24;16;9	24;24;16;9	24;24;16;9	Pumilio domain-containing protein KIAA0020	Kiaa0020	tr|A0A0N4SUH4|A0A0N4SUH4_MOUSE Pumilio homolog 3 OS=Mus musculus OX=10090 GN=Pum3 PE=1 SV=1;sp|Q8BKS9|PUM3_MOUSE Pumilio homolog 3 OS=Mus musculus OX=10090 GN=Pum3 PE=1 SV=2;tr|A0A494BBI7|A0A494BBI7_MOUSE Pumilio homolog 3 (Fragment) OS=Mus musculus OX=100	4	24	24	24	17	17	19	20	19	15	17	18	18	17	17	19	20	19	15	17	18	18	17	17	19	20	19	15	17	18	18	42.6	42.6	42.6	72.93	648	648;647;404;300	0	323.31
A0A0N4SUU7	ENSMUSG00000048794	243538	A0A0N4SUU7	A0A0N4SUU7	1	1	1	cilia and flagella associated protein 100	Cfap100	tr|A0A0N4SUU7|A0A0N4SUU7_MOUSE Cilia- and flagella-associated protein 100 OS=Mus musculus OX=10090 GN=Cfap100 PE=4 SV=1	1	1	1	1	0	0	1	0	0	0	0	0	0	0	0	1	0	0	0	0	0	0	0	0	1	0	0	0	0	0	0	23.1	23.1	23.1	4.4391	39	39	1	-2
A0A0N4SV57	ENSMUSG00000029994	11746	A0A0N4SV57;A0A0N4SW89;P97429;S4R1F2;F7ANV6;D3Z0S1	A0A0N4SV57;A0A0N4SW89;P97429;S4R1F2;F7ANV6;D3Z0S1	2;2;2;1;1;1	2;2;2;1;1;1	2;2;2;1;1;1	Annexin A4;Annexin	Anxa4	tr|A0A0N4SV57|A0A0N4SV57_MOUSE Annexin (Fragment) OS=Mus musculus OX=10090 GN=Anxa4 PE=1 SV=1;tr|A0A0N4SW89|A0A0N4SW89_MOUSE Annexin (Fragment) OS=Mus musculus OX=10090 GN=Anxa4 PE=1 SV=3;sp|P97429|ANXA4_MOUSE Annexin A4 OS=Mus musculus OX=10090 GN=Anxa4 P	6	2	2	2	0	2	0	0	0	0	0	0	0	0	2	0	0	0	0	0	0	0	0	2	0	0	0	0	0	0	0	10.5	10.5	10.5	29.146	258	258;273;319;196;215;254	0	33.662
A0A0N4SV66	ENSMUSG00000060032	232440	A0A0N4SV66;C0HKE2;C0HKE9;C0HKE7;C0HKE5;C0HKE3;C0HKE4;C0HKE1;C0HKE6;Q8CGP4;C0HKE8;Q8CGP6;Q8R1M2;Q8BFU2;Q8CGP5;Q8CGP7;Q64523;Q6GSS7	A0A0N4SV66;C0HKE2;C0HKE9;C0HKE7;C0HKE5;C0HKE3;C0HKE4;C0HKE1;C0HKE6;Q8CGP4;C0HKE8;Q8CGP6;Q8R1M2;Q8BFU2;Q8CGP5;Q8CGP7;Q64523;Q6GSS7	4;4;4;4;4;4;4;4;4;4;4;4;4;4;4;4;3;3	2;2;2;2;2;2;2;2;2;2;2;2;2;2;2;2;1;1	2;2;2;2;2;2;2;2;2;2;2;2;2;2;2;2;1;1	Histone H2A;Histone H2A type 1-H;Histone H2A.J;Histone H2A type 3;Histone H2A type 1-F;Histone H2A type 1-K;Histone H2A type 2-C;Histone H2A type 2-A	Hist1h2aa;Hist1h2ah;H2afj;Hist3h2a;Hist1h2af;Hist1h2ak;Hist2h2ac;Hist2h2aa1	tr|A0A0N4SV66|A0A0N4SV66_MOUSE Histone H2A OS=Mus musculus OX=10090 GN=H2aj PE=1 SV=1;sp|C0HKE2|H2A1C_MOUSE Histone H2A type 1-C OS=Mus musculus OX=10090 GN=H2ac6 PE=1 SV=1;sp|C0HKE9|H2A1P_MOUSE Histone H2A type 1-P OS=Mus musculus OX=10090 GN=Hist1h2ap PE	18	4	2	2	3	3	4	3	3	3	3	3	3	1	1	2	1	1	1	1	1	1	1	1	2	1	1	1	1	1	1	36.5	29.4	29.4	13.66	126	126;130;130;130;130;130;130;130;130;129;130;128;129;130;130;130;129;130	0	61.849
A0A0N4SV80	ENSMUSG00000030016	18139	A0A0N4SV80;E9QML5;Q61464-4;Q61464;A0A0N4SVM8;Q3TZK9;A0A0N4SV38;A0A0N4SVI8;E9QKZ7;Q61464-7;Q61464-2;Q61464-5;Q61464-3	A0A0N4SV80;E9QML5;Q61464-4;Q61464;A0A0N4SVM8;Q3TZK9;A0A0N4SV38;A0A0N4SVI8;E9QKZ7;Q61464-7;Q61464-2;Q61464-5;Q61464-3	11;11;11;11;10;10;10;10;10;10;10;10;8	11;11;11;11;10;10;10;10;10;10;10;10;8	11;11;11;11;10;10;10;10;10;10;10;10;8	Zinc finger protein 638	Zfml;Znf638	tr|A0A0N4SV80|A0A0N4SV80_MOUSE Zinc finger protein 638 OS=Mus musculus OX=10090 GN=Zfp638 PE=1 SV=1;tr|E9QML5|E9QML5_MOUSE Zinc finger protein 638 OS=Mus musculus OX=10090 GN=Zfp638 PE=1 SV=2;sp|Q61464-4|ZN638_MOUSE Isoform 4 of Zinc finger protein 638 OS=	13	11	11	11	8	5	3	6	5	2	5	5	5	8	5	3	6	5	2	5	5	5	8	5	3	6	5	2	5	5	5	8.1	8.1	8.1	214.46	1926	1926;1960;1926;1960;832;891;1239;1273;1275;1240;1271;1274;455	0	42.138
A0A0N4SVB8	ENSMUSG00000030105	67166	A0A0N4SVB8;Q9CQW2;F6QKK2;Q8VEH3	A0A0N4SVB8;Q9CQW2;F6QKK2;Q8VEH3	2;2;1;1	2;2;1;1	2;2;1;1	ADP-ribosylation factor-like protein 8B;ADP-ribosylation factor-like protein 8A	Arl8b;Arl8a	tr|A0A0N4SVB8|A0A0N4SVB8_MOUSE ADP-ribosylation factor-like protein 8B OS=Mus musculus OX=10090 GN=Arl8b PE=1 SV=1;sp|Q9CQW2|ARL8B_MOUSE ADP-ribosylation factor-like protein 8B OS=Mus musculus OX=10090 GN=Arl8b PE=1 SV=1;tr|F6QKK2|F6QKK2_MOUSE ADP-ribosyla	4	2	2	2	0	2	0	0	0	0	0	0	0	0	2	0	0	0	0	0	0	0	0	2	0	0	0	0	0	0	0	13	13	13	15.985	138	138;186;165;186	0.0014472	4.1999
A0A0N4SVC2	ENSMUSG00000029817	101214	A0A0N4SVC2;E9QP00;Q6PFR5;A0A0N4SV13	A0A0N4SVC2;E9QP00;Q6PFR5	3;3;3;1	2;2;2;1	2;2;2;1	Transformer-2 protein homolog alpha	Tra2a	tr|A0A0N4SVC2|A0A0N4SVC2_MOUSE Transformer-2 protein homolog alpha OS=Mus musculus OX=10090 GN=Tra2a PE=1 SV=1;tr|E9QP00|E9QP00_MOUSE Transformer-2 protein homolog alpha OS=Mus musculus OX=10090 GN=Tra2a PE=1 SV=1;sp|Q6PFR5|TRA2A_MOUSE Transformer-2 protei	4	3	2	2	2	2	2	2	2	3	2	2	2	1	1	1	1	1	2	1	1	1	1	1	1	1	1	2	1	1	1	12.1	8.9	8.9	32.259	280	280;282;281;59	0	6.9504
A0A0N4SVR0	ENSMUSG00000019124	69938	A0A0N4SVR0;A0A0N4SWD0;Q9CZC8	A0A0N4SVR0;A0A0N4SWD0;Q9CZC8	1;1;1	1;1;1	1;1;1	Secernin-1	Scrn1	tr|A0A0N4SVR0|A0A0N4SVR0_MOUSE Secernin-1 (Fragment) OS=Mus musculus OX=10090 GN=Scrn1 PE=1 SV=1;tr|A0A0N4SWD0|A0A0N4SWD0_MOUSE Secernin-1 (Fragment) OS=Mus musculus OX=10090 GN=Scrn1 PE=1 SV=1;sp|Q9CZC8|SCRN1_MOUSE Secernin-1 OS=Mus musculus OX=10090 GN=S	3	1	1	1	0	1	0	0	0	0	0	0	0	0	1	0	0	0	0	0	0	0	0	1	0	0	0	0	0	0	0	13.5	13.5	13.5	5.8496	52	52;164;414	1	-2
A0A0N5E9G7	ENSMUSG00000029191	19687	A0A0N5E9G7;G3X8Z6;Q5U4B1;G3UWX1;P35601-2;P35601;A0A0N4SVN6	A0A0N5E9G7;G3X8Z6;Q5U4B1;G3UWX1;P35601-2;P35601	27;27;27;27;27;27;4	27;27;27;27;27;27;4	27;27;27;27;27;27;4	Replication factor C subunit 1	Rfc1	tr|A0A0N5E9G7|A0A0N5E9G7_MOUSE Replication factor C subunit 1 OS=Mus musculus OX=10090 GN=Rfc1 PE=1 SV=1;tr|G3X8Z6|G3X8Z6_MOUSE Replication factor C subunit 1 OS=Mus musculus OX=10090 GN=Rfc1 PE=1 SV=1;tr|Q5U4B1|Q5U4B1_MOUSE Replication factor C subunit 1	7	27	27	27	15	15	17	15	16	11	12	15	16	15	15	17	15	16	11	12	15	16	15	15	17	15	16	11	12	15	16	27.3	27.3	27.3	125.86	1130	1130;1131;1132;1145;1130;1131;212	0	182.53
A0A0R4IZY9	ENSMUSG00000007603	224907	A0A0R4IZY9;Q91XI1-2;Q91XI1	A0A0R4IZY9;Q91XI1-2;Q91XI1	2;1;1	2;1;1	2;1;1	tRNA-dihydrouridine(47) synthase [NAD(P)(+)]-like	Dus3l	tr|A0A0R4IZY9|A0A0R4IZY9_MOUSE tRNA-dihydrouridine(47) synthase [NAD(P)(+)] OS=Mus musculus OX=10090 GN=Dus3l PE=1 SV=1;sp|Q91XI1-2|DUS3L_MOUSE Isoform 2 of tRNA-dihydrouridine(47) synthase [NAD(P)(+)]-like OS=Mus musculus OX=10090 GN=Dus3l;sp|Q91XI1|DUS3L	3	2	2	2	1	0	0	2	0	0	1	0	0	1	0	0	2	0	0	1	0	0	1	0	0	2	0	0	1	0	0	5.3	5.3	5.3	71.15	637	637;426;637	0	7.4425
A0A0R4J008	ENSMUSG00000019777	15182	A0A0R4J008;P70288;Q8BQ10;Q3UM33;O88895	A0A0R4J008;P70288;Q8BQ10	9;9;8;1;1	6;6;5;0;0	6;6;5;0;0	Histone deacetylase 2	Hdac2	tr|A0A0R4J008|A0A0R4J008_MOUSE Histone deacetylase 2 OS=Mus musculus OX=10090 GN=Hdac2 PE=1 SV=1;sp|P70288|HDAC2_MOUSE Histone deacetylase 2 OS=Mus musculus OX=10090 GN=Hdac2 PE=1 SV=1;tr|Q8BQ10|Q8BQ10_MOUSE Histone deacetylase OS=Mus musculus OX=10090 GN=	5	9	6	6	7	6	6	5	6	5	5	6	7	6	4	5	4	5	3	4	5	5	6	4	5	4	5	3	4	5	5	24.2	17.6	17.6	55.33	488	488;488;304;428;424	0	30.76
A0A0R4J047	ENSMUSG00000024188	66978	A0A0R4J047;Q9CYI4;Q9CYI4-2;D3Z765;D6RGP6	A0A0R4J047;Q9CYI4;Q9CYI4-2;D3Z765	8;8;6;4;1	3;3;2;1;0	3;3;2;1;0	Putative RNA-binding protein Luc7-like 1	Luc7l	tr|A0A0R4J047|A0A0R4J047_MOUSE Putative RNA-binding protein Luc7-like 1 OS=Mus musculus OX=10090 GN=Luc7l PE=1 SV=1;sp|Q9CYI4|LUC7L_MOUSE Putative RNA-binding protein Luc7-like 1 OS=Mus musculus OX=10090 GN=Luc7l PE=1 SV=2;sp|Q9CYI4-2|LUC7L_MOUSE Isoform 2	5	8	3	3	3	4	7	7	6	5	7	6	7	2	1	3	3	3	1	3	3	3	2	1	3	3	3	1	3	3	3	28	11.7	11.7	38.465	325	325;371;318;172;79	0	24.155
A0A0R4J049	ENSMUSG00000023110	27374	A0A0R4J049;Q8CIG8;F6QQQ6;A0A2I3BRG2;S4R295	A0A0R4J049;Q8CIG8;F6QQQ6	3;3;2;1;1	3;3;2;1;1	3;3;2;1;1	Protein arginine N-methyltransferase 5	Prmt5	tr|A0A0R4J049|A0A0R4J049_MOUSE Protein arginine N-methyltransferase 5 OS=Mus musculus OX=10090 GN=Prmt5 PE=1 SV=1;sp|Q8CIG8|ANM5_MOUSE Protein arginine N-methyltransferase 5 OS=Mus musculus OX=10090 GN=Prmt5 PE=1 SV=3;tr|F6QQQ6|F6QQQ6_MOUSE Protein arginin	5	3	3	3	0	1	1	1	0	1	1	1	1	0	1	1	1	0	1	1	1	1	0	1	1	1	0	1	1	1	1	5.5	5.5	5.5	72.737	637	637;637;203;37;63	0	6.925
A0A0R4J074	ENSMUSG00000026646	64707	A0A0R4J074;Q9EQQ0;F6WB49;Q8K085;E0CZC9	A0A0R4J074;Q9EQQ0;F6WB49	9;9;7;3;1	9;9;7;3;1	9;9;7;3;1	Histone-lysine N-methyltransferase SUV39H2	Suv39h2	tr|A0A0R4J074|A0A0R4J074_MOUSE Histone-lysine N-methyltransferase OS=Mus musculus OX=10090 GN=Suv39h2 PE=1 SV=1;sp|Q9EQQ0|SUV92_MOUSE Histone-lysine N-methyltransferase SUV39H2 OS=Mus musculus OX=10090 GN=Suv39h2 PE=1 SV=1;tr|F6WB49|F6WB49_MOUSE [Histone H	5	9	9	9	7	6	6	9	7	7	5	8	8	7	6	6	9	7	7	5	8	8	7	6	6	9	7	7	5	8	8	21.8	21.8	21.8	54.095	477	477;477;375;257;116	0	44.594
A0A0R4J093	ENSMUSG00000028719	66588	A0A0R4J093;Q9DBP5	A0A0R4J093;Q9DBP5	7;7	7;7	7;7	UMP-CMP kinase	Cmpk1	tr|A0A0R4J093|A0A0R4J093_MOUSE UMP-CMP kinase OS=Mus musculus OX=10090 GN=Cmpk1 PE=1 SV=1;sp|Q9DBP5|KCY_MOUSE UMP-CMP kinase OS=Mus musculus OX=10090 GN=Cmpk1 PE=1 SV=1	2	7	7	7	0	7	0	1	0	0	1	1	2	0	7	0	1	0	0	1	1	2	0	7	0	1	0	0	1	1	2	34.4	34.4	34.4	25.714	227	227;196	0	19.143
A0A0R4J098	ENSMUSG00000029290	54367	A0A0R4J098;O88291;D3YXQ7;O88291-2;D6RG92;O88291-3	A0A0R4J098;O88291;D3YXQ7	9;9;5;3;1;1	9;9;5;3;1;1	9;9;5;3;1;1	DBIRD complex subunit ZNF326	Znf326;Zfp326	tr|A0A0R4J098|A0A0R4J098_MOUSE Zinc finger protein 326 OS=Mus musculus OX=10090 GN=Zfp326 PE=1 SV=1;sp|O88291|ZN326_MOUSE DBIRD complex subunit ZNF326 OS=Mus musculus OX=10090 GN=Znf326 PE=1 SV=1;tr|D3YXQ7|D3YXQ7_MOUSE Zinc finger protein 326 (Fragment) OS	6	9	9	9	7	3	5	4	3	4	3	4	4	7	3	5	4	3	4	3	4	4	7	3	5	4	3	4	3	4	4	21	21	21	65.166	580	580;580;415;374;53;67	0	42.397
A0A0R4J0B4	ENSMUSG00000030282	12764	A0A0R4J0B4;Q99KK2;Q99KK2-2	A0A0R4J0B4;Q99KK2;Q99KK2-2	3;3;2	3;3;2	3;3;2	N-acylneuraminate cytidylyltransferase	Cmas	tr|A0A0R4J0B4|A0A0R4J0B4_MOUSE CMP-N-acetylneuraminic acid synthase OS=Mus musculus OX=10090 GN=Cmas PE=1 SV=1;sp|Q99KK2|NEUA_MOUSE N-acylneuraminate cytidylyltransferase OS=Mus musculus OX=10090 GN=Cmas PE=1 SV=2;sp|Q99KK2-2|NEUA_MOUSE Isoform 2 of N-acyl	3	3	3	3	2	2	1	2	2	1	2	1	1	2	2	1	2	2	1	2	1	1	2	2	1	2	2	1	2	1	1	8.3	8.3	8.3	48.029	432	432;432;200	0	7.1948
A0A0R4J0D3	ENSMUSG00000032437	68292	A0A0R4J0D3;Q3TDQ1	A0A0R4J0D3;Q3TDQ1	11;11	11;11	11;11	Dolichyl-diphosphooligosaccharide--protein glycosyltransferase subunit STT3B	Stt3b	tr|A0A0R4J0D3|A0A0R4J0D3_MOUSE Dolichyl-diphosphooligosaccharide--protein glycotransferase OS=Mus musculus OX=10090 GN=Stt3b PE=1 SV=1;sp|Q3TDQ1|STT3B_MOUSE Dolichyl-diphosphooligosaccharide--protein glycosyltransferase subunit STT3B OS=Mus musculus OX=100	2	11	11	11	5	5	4	7	6	6	7	5	5	5	5	4	7	6	6	7	5	5	5	5	4	7	6	6	7	5	5	16	16	16	93.314	823	823;823	0	71.066
A0A0R4J0H7	ENSMUSG00000038252	68298	A0A0R4J0H7;Q8K2Z4;Q8K2Z4-2;A0A087WRK6;A0A087WNQ1	A0A0R4J0H7;Q8K2Z4;Q8K2Z4-2	7;7;7;1;1	7;7;7;1;1	7;7;7;1;1	Condensin complex subunit 1	Ncapd2	tr|A0A0R4J0H7|A0A0R4J0H7_MOUSE Condensin complex subunit 1 OS=Mus musculus OX=10090 GN=Ncapd2 PE=1 SV=1;sp|Q8K2Z4|CND1_MOUSE Condensin complex subunit 1 OS=Mus musculus OX=10090 GN=Ncapd2 PE=1 SV=2;sp|Q8K2Z4-2|CND1_MOUSE Isoform 2 of Condensin complex subu	5	7	7	7	2	0	1	1	0	0	0	3	3	2	0	1	1	0	0	0	3	3	2	0	1	1	0	0	0	3	3	7	7	7	155.59	1392	1392;1392;1404;94;162	0	11.234
Q8BJZ4	ENSMUSG00000040112	232536	Q8BJZ4;A0A0R4J0L6;A0A0N4SV23	Q8BJZ4;A0A0R4J0L6	5;5;1	5;5;1	5;5;1	28S ribosomal protein S35, mitochondrial	Mrps35	sp|Q8BJZ4|RT35_MOUSE 28S ribosomal protein S35, mitochondrial OS=Mus musculus OX=10090 GN=Mrps35 PE=1 SV=2;tr|A0A0R4J0L6|A0A0R4J0L6_MOUSE 28S ribosomal protein S35, mitochondrial OS=Mus musculus OX=10090 GN=Mrps35 PE=1 SV=1	3	5	5	5	5	2	3	0	0	1	0	0	0	5	2	3	0	0	1	0	0	0	5	2	3	0	0	1	0	0	0	19.4	19.4	19.4	35.975	320	320;320;85	0	17.686
A0A0R4J0M9	ENSMUSG00000045210	70675	A0A0R4J0M9;Q8CDG3-2;Q8CDG3	A0A0R4J0M9;Q8CDG3-2;Q8CDG3	1;1;1	1;1;1	1;1;1	Deubiquitinating protein VCIP135	Vcpip1	tr|A0A0R4J0M9|A0A0R4J0M9_MOUSE Ubiquitinyl hydrolase 1 OS=Mus musculus OX=10090 GN=Vcpip1 PE=1 SV=1;sp|Q8CDG3-2|VCIP1_MOUSE Isoform 2 of Deubiquitinating protein VCPIP1 OS=Mus musculus OX=10090 GN=Vcpip1;sp|Q8CDG3|VCIP1_MOUSE Deubiquitinating protein VCPIP	3	1	1	1	0	0	1	0	0	0	0	0	0	0	0	1	0	0	0	0	0	0	0	0	1	0	0	0	0	0	0	1.3	1.3	1.3	134.44	1220	1220;906;1220	0.0092251	2.4719
A0A0R4J0R3	ENSMUSG00000048039	229504	A0A0R4J0R3;Q3U1G5	A0A0R4J0R3;Q3U1G5	12;12	12;12	12;12	Interferon-stimulated 20 kDa exonuclease-like 2	Isg20l2	tr|A0A0R4J0R3|A0A0R4J0R3_MOUSE Interferon-stimulated 20 kDa exonuclease-like 2 OS=Mus musculus OX=10090 GN=Isg20l2 PE=1 SV=1;sp|Q3U1G5|I20L2_MOUSE Interferon-stimulated 20 kDa exonuclease-like 2 OS=Mus musculus OX=10090 GN=Isg20l2 PE=1 SV=2	2	12	12	12	8	4	8	9	10	8	8	9	8	8	4	8	9	10	8	8	9	8	8	4	8	9	10	8	8	9	8	39.9	39.9	39.9	40.991	368	368;368	0	121.83
A0A0R4J0T5	ENSMUSG00000005506	13046	A0A0R4J0T5;P28659-2;P28659-3;P28659;P28659-4	A0A0R4J0T5;P28659-2;P28659-3;P28659;P28659-4	2;2;2;2;2	2;2;2;2;2	2;2;2;2;2	CUGBP Elav-like family member 1	Celf1	tr|A0A0R4J0T5|A0A0R4J0T5_MOUSE CUGBP Elav-like family member 1 OS=Mus musculus OX=10090 GN=Celf1 PE=1 SV=1;sp|P28659-2|CELF1_MOUSE Isoform 2 of CUGBP Elav-like family member 1 OS=Mus musculus OX=10090 GN=Celf1;sp|P28659-3|CELF1_MOUSE Isoform 3 of CUGBP Ela	5	2	2	2	1	1	1	2	1	0	1	1	2	1	1	1	2	1	0	1	1	2	1	1	1	2	1	0	1	1	2	4.3	4.3	4.3	52.178	487	487;482;483;486;513	0	4.5819
A0A0R4J0U8	ENSMUSG00000053286	98685	A0A0R4J0U8;A2RSY6;A2RSY6-2;A2RSY6-3;A0A087WQ23	A0A0R4J0U8;A2RSY6;A2RSY6-2	20;20;18;6;5	20;20;18;6;5	20;20;18;6;5	TRMT1-like protein	Trmt1l	tr|A0A0R4J0U8|A0A0R4J0U8_MOUSE TRMT1-like protein OS=Mus musculus OX=10090 GN=Trmt1l PE=1 SV=1;sp|A2RSY6|TRM1L_MOUSE TRMT1-like protein OS=Mus musculus OX=10090 GN=Trmt1l PE=1 SV=1;sp|A2RSY6-2|TRM1L_MOUSE Isoform 2 of TRMT1-like protein OS=Mus musculus OX=	5	20	20	20	7	11	9	14	14	11	15	12	12	7	11	9	14	14	11	15	12	12	7	11	9	14	14	11	15	12	12	33.5	33.5	33.5	80.919	728	728;728;671;285;158	0	66.581
A0A0R4J0V5	ENSMUSG00000005198	20020	A0A0R4J0V5;P08775	A0A0R4J0V5;P08775	2;2	2;2	2;2	DNA-directed RNA polymerase II subunit RPB1	Polr2a	tr|A0A0R4J0V5|A0A0R4J0V5_MOUSE DNA-directed RNA polymerase subunit OS=Mus musculus OX=10090 GN=Polr2a PE=1 SV=1;sp|P08775|RPB1_MOUSE DNA-directed RNA polymerase II subunit RPB1 OS=Mus musculus OX=10090 GN=Polr2a PE=1 SV=3	2	2	2	2	2	0	0	0	0	0	0	0	0	2	0	0	0	0	0	0	0	0	2	0	0	0	0	0	0	0	0	1.7	1.7	1.7	213.48	1932	1932;1970	0.0014388	4.1156
A0A0R4J0W6	ENSMUSG00000063052	67144	A0A0R4J0W6;Q9CRC8	A0A0R4J0W6;Q9CRC8	3;3	3;3	3;3	Leucine-rich repeat-containing protein 40	Lrrc40	tr|A0A0R4J0W6|A0A0R4J0W6_MOUSE Leucine-rich repeat-containing protein 40 OS=Mus musculus OX=10090 GN=Lrrc40 PE=1 SV=1;sp|Q9CRC8|LRC40_MOUSE Leucine-rich repeat-containing protein 40 OS=Mus musculus OX=10090 GN=Lrrc40 PE=1 SV=2	2	3	3	3	0	0	1	0	0	0	1	1	1	0	0	1	0	0	0	1	1	1	0	0	1	0	0	0	1	1	1	6.1	6.1	6.1	68.048	602	602;602	0	5.0126
A0A0R4J0X7	ENSMUSG00000061099	14447	A0A0R4J0X7;S4R2G5;Q64467;V9GX06	A0A0R4J0X7;S4R2G5;Q64467	3;3;3;1	1;1;1;1	1;1;1;1	Glyceraldehyde-3-phosphate dehydrogenase;Glyceraldehyde-3-phosphate dehydrogenase, testis-specific	Gapdhs	tr|A0A0R4J0X7|A0A0R4J0X7_MOUSE Glyceraldehyde-3-phosphate dehydrogenase OS=Mus musculus OX=10090 GN=Gapdhs PE=1 SV=1;tr|S4R2G5|S4R2G5_MOUSE Glyceraldehyde-3-phosphate dehydrogenase OS=Mus musculus OX=10090 GN=Gapdhs PE=1 SV=1;sp|Q64467|G3PT_MOUSE Glycerald	4	3	1	1	1	3	1	1	2	1	2	2	1	0	1	0	0	0	0	0	0	0	0	1	0	0	0	0	0	0	0	7.3	2.5	2.5	47.442	438	438;440;440;183	1	-2
A0A0R4J124	ENSMUSG00000062604	20817	A0A0R4J124;O54781;Q6P5E1;A0A0G2JG74;Q9Z0G2;A0A0G2JDY2	A0A0R4J124;O54781	18;17;5;4;3;2	15;14;5;4;0;1	15;14;5;4;0;1	SRSF protein kinase 2;SRSF protein kinase 2 N-terminal;SRSF protein kinase 2 C-terminal	Srpk2	tr|A0A0R4J124|A0A0R4J124_MOUSE SRSF protein kinase 2 OS=Mus musculus OX=10090 GN=Srpk2 PE=1 SV=1;sp|O54781|SRPK2_MOUSE SRSF protein kinase 2 OS=Mus musculus OX=10090 GN=Srpk2 PE=1 SV=2	6	18	15	15	8	9	8	10	10	13	9	8	13	5	6	5	8	7	10	7	5	10	5	6	5	8	7	10	7	5	10	35.2	30.9	30.9	76.884	682	682;681;156;134;565;129	0	71.652
D6RHN2	ENSMUSG00000068874	20341	D6RHN2;G3UWK0;G3UZT2;A0A0R4J135;Q63836;P17563	D6RHN2;G3UWK0;G3UZT2;A0A0R4J135;Q63836;P17563	1;1;1;1;1;1	1;1;1;1;1;1	1;1;1;1;1;1	Selenium-binding protein 2;Selenium-binding protein 1	Selenbp1;Selenbp2	tr|D6RHN2|D6RHN2_MOUSE Methanethiol oxidase OS=Mus musculus OX=10090 GN=Selenbp1 PE=1 SV=1;tr|G3UWK0|G3UWK0_MOUSE Selenium-binding protein 2 (Fragment) OS=Mus musculus OX=10090 GN=Selenbp2 PE=1 SV=1;tr|G3UZT2|G3UZT2_MOUSE Selenium-binding protein 2 (Fragme	6	1	1	1	0	0	0	0	0	0	0	1	0	0	0	0	0	0	0	0	1	0	0	0	0	0	0	0	0	1	0	8.1	8.1	8.1	13.666	123	123;128;134;472;472;472	0.0020067	3.1451
Q3TKT4-2	ENSMUSG00000032187	20586	Q3TKT4-2;Q3TKT4;A0A0R4J170;G3UX35;Q6DIC0;H3BLH0;F2Z4A9;E9QAB8;H3BJK2;A0A140LID0;H3BKN5;A0A140LHF4;A0A140LHP6;H3BK47;A0A140LJK1;H3BJM2;A0A140LIM0;A0A140LI14;Q9D007;A0A140LIQ9;A0A140LJD7;A0A140LHE2;H3BLI4;H3BJI1;A0A140LHZ8;A0A140LIV3;H3BKJ3	Q3TKT4-2;Q3TKT4;A0A0R4J170;G3UX35	9;9;9;7;4;4;4;3;2;1;1;1;1;1;1;1;1;1;1;1;1;1;1;1;1;1;1	9;9;9;7;4;4;4;3;2;1;1;1;1;1;1;1;1;1;1;1;1;1;1;1;1;1;1	9;9;9;7;4;4;4;3;2;1;1;1;1;1;1;1;1;1;1;1;1;1;1;1;1;1;1	Transcription activator BRG1	Smarca4	sp|Q3TKT4-2|SMCA4_MOUSE Isoform 2 of Transcription activator BRG1 OS=Mus musculus OX=10090 GN=Smarca4;sp|Q3TKT4|SMCA4_MOUSE Transcription activator BRG1 OS=Mus musculus OX=10090 GN=Smarca4 PE=1 SV=1;tr|A0A0R4J170|A0A0R4J170_MOUSE Transcription activator BR	27	9	9	9	3	0	1	4	2	3	5	6	5	3	0	1	4	2	3	5	6	5	3	0	1	4	2	3	5	6	5	6.4	6.4	6.4	181.51	1614	1614;1613;1617;1267;1577;1601;1583;1510;1525;267;299;296;278;276;169;149;260;244;236;229;228;228;211;201;200;170;254	0	20.107
A0A0R4J187	ENSMUSG00000022471	14375	A0A0R4J187;P23475;A0A2R8VHZ9;E9Q163;E9PZD4;E9Q4A4	A0A0R4J187;P23475	20;19;8;4;3;1	20;19;8;4;3;1	20;19;8;4;3;1	X-ray repair cross-complementing protein 6	Xrcc6	tr|A0A0R4J187|A0A0R4J187_MOUSE ATP-dependent DNA helicase 2 subunit 1 OS=Mus musculus OX=10090 GN=Xrcc6 PE=1 SV=1;sp|P23475|XRCC6_MOUSE X-ray repair cross-complementing protein 6 OS=Mus musculus OX=10090 GN=Xrcc6 PE=1 SV=5	6	20	20	20	13	14	14	10	10	10	10	10	12	13	14	14	10	10	10	10	10	12	13	14	14	10	10	10	10	10	12	35.9	35.9	35.9	69.484	608	608;608;263;106;97;27	0	210.45
A0A0R4J1C0	ENSMUSG00000006920	14055	A0A0R4J1C0;P70351;P70351-2	A0A0R4J1C0;P70351;P70351-2	6;6;3	5;5;3	5;5;3	Histone-lysine N-methyltransferase EZH1	Ezh1	tr|A0A0R4J1C0|A0A0R4J1C0_MOUSE [Histone H3]-lysine(27) N-trimethyltransferase OS=Mus musculus OX=10090 GN=Ezh1 PE=1 SV=1;sp|P70351|EZH1_MOUSE Histone-lysine N-methyltransferase EZH1 OS=Mus musculus OX=10090 GN=Ezh1 PE=1 SV=1;sp|P70351-2|EZH1_MOUSE Isoform	3	6	5	5	0	0	0	1	2	2	0	3	0	0	0	0	1	1	2	0	3	0	0	0	0	1	1	2	0	3	0	8.9	7.9	7.9	85.603	750	750;747;579	0	10.292
A0A0R4J1F8	ENSMUSG00000037572	218973	A0A0R4J1F8;A0A2K6EDP7;P59328-3;P59328;P59328-2	A0A0R4J1F8;A0A2K6EDP7;P59328-3;P59328;P59328-2	3;3;3;3;2	3;3;3;3;2	3;3;3;3;2	WD repeat and HMG-box DNA-binding protein 1	Wdhd1	tr|A0A0R4J1F8|A0A0R4J1F8_MOUSE WD repeat and HMG-box DNA-binding protein 1 OS=Mus musculus OX=10090 GN=Wdhd1 PE=1 SV=1;tr|A0A2K6EDP7|A0A2K6EDP7_MOUSE WD repeat and HMG-box DNA-binding protein 1 OS=Mus musculus OX=10090 GN=Wdhd1 PE=1 SV=1;sp|P59328-3|WDHD1_	5	3	3	3	2	0	1	1	0	0	1	3	1	2	0	1	1	0	0	1	3	1	2	0	1	1	0	0	1	3	1	4.2	4.2	4.2	120.34	1081	1081;1118;1080;1117;641	0	7.046
A0A0R4J1I0	ENSMUSG00000024968	104383	A0A0R4J1I0;Q8C796	A0A0R4J1I0;Q8C796	4;4	3;3	3;3	REST corepressor 2	Rcor2	tr|A0A0R4J1I0|A0A0R4J1I0_MOUSE REST corepressor 2 OS=Mus musculus OX=10090 GN=Rcor2 PE=1 SV=1;sp|Q8C796|RCOR2_MOUSE REST corepressor 2 OS=Mus musculus OX=10090 GN=Rcor2 PE=1 SV=1	2	4	3	3	1	1	1	0	1	0	1	3	0	1	1	0	0	0	0	0	3	0	1	1	0	0	0	0	0	3	0	7.7	6.3	6.3	53.304	479	479;523	0	5.2978
A0A0R4J1Q0	ENSMUSG00000036270	234699	A0A0R4J1Q0;G5E896;D6RE33;Q3UJB9-2;Q3UJB9;F6ZJ27;F6V5I7	A0A0R4J1Q0;G5E896;D6RE33;Q3UJB9-2;Q3UJB9	5;5;4;4;4;2;1	5;5;4;4;4;2;1	5;5;4;4;4;2;1	Enhancer of mRNA-decapping protein 4	Edc4	tr|A0A0R4J1Q0|A0A0R4J1Q0_MOUSE Enhancer of mRNA-decapping protein 4 OS=Mus musculus OX=10090 GN=Edc4 PE=1 SV=1;tr|G5E896|G5E896_MOUSE Enhancer of mRNA-decapping protein 4 OS=Mus musculus OX=10090 GN=Edc4 PE=1 SV=1;tr|D6RE33|D6RE33_MOUSE Enhancer of mRNA-de	7	5	5	5	4	1	4	1	0	0	2	1	2	4	1	4	1	0	0	2	1	2	4	1	4	1	0	0	2	1	2	5.9	5.9	5.9	150.65	1390	1390;1406;1318;1390;1406;427;265	0	26.225
A0A0R4J260	ENSMUSG00000036990	73945	A0A0R4J260;B2RRE7	A0A0R4J260;B2RRE7	9;9	9;9	9;9	OTU domain-containing protein 4	Otud4	tr|A0A0R4J260|A0A0R4J260_MOUSE Ubiquitinyl hydrolase 1 OS=Mus musculus OX=10090 GN=Otud4 PE=1 SV=1;sp|B2RRE7|OTUD4_MOUSE OTU domain-containing protein 4 OS=Mus musculus OX=10090 GN=Otud4 PE=1 SV=1	2	9	9	9	5	1	3	2	3	4	3	2	3	5	1	3	2	3	4	3	2	3	5	1	3	2	3	4	3	2	3	11.7	11.7	11.7	122.93	1106	1106;1107	0	24.645
A0A0R4J293	ENSMUSG00000022218	21816	A0A0R4J293;Q9JLF6;A0A2I3BRW9;A0A2I3BS02;A0A2I3BQN2	A0A0R4J293;Q9JLF6	9;9;1;1;1	9;9;1;1;1	9;9;1;1;1	Protein-glutamine gamma-glutamyltransferase K	Tgm1	tr|A0A0R4J293|A0A0R4J293_MOUSE Protein-glutamine gamma-glutamyltransferase K OS=Mus musculus OX=10090 GN=Tgm1 PE=1 SV=1;sp|Q9JLF6|TGM1_MOUSE Protein-glutamine gamma-glutamyltransferase K OS=Mus musculus OX=10090 GN=Tgm1 PE=1 SV=2	5	9	9	9	5	7	7	5	3	5	5	4	5	5	7	7	5	3	5	5	4	5	5	7	7	5	3	5	5	4	5	12.1	12.1	12.1	89.795	815	815;815;116;164;167	0	27.138
A0A0U1RNT6	ENSMUSG00000053907	232087	A0A0U1RNT6;A0A0U1RNK6;Q3THS6;A0A0U1RQ95	A0A0U1RNT6;A0A0U1RNK6;Q3THS6;A0A0U1RQ95	3;3;3;2	3;3;3;2	3;3;3;2	S-adenosylmethionine synthase isoform type-2	Mat2a	tr|A0A0U1RNT6|A0A0U1RNT6_MOUSE S-adenosylmethionine synthase OS=Mus musculus OX=10090 GN=Mat2a PE=1 SV=1;tr|A0A0U1RNK6|A0A0U1RNK6_MOUSE S-adenosylmethionine synthase OS=Mus musculus OX=10090 GN=Mat2a PE=1 SV=1;sp|Q3THS6|METK2_MOUSE S-adenosylmethionine syn	4	3	3	3	1	2	1	1	1	1	1	1	2	1	2	1	1	1	1	1	1	2	1	2	1	1	1	1	1	1	2	16.3	16.3	16.3	39.738	362	362;365;395;192	0	10.206
A0A0U1RP93	ENSMUSG00000030672	17907	A0A0U1RP93;P97457	A0A0U1RP93;P97457	2;2	2;2	2;2	Myosin regulatory light chain 2, skeletal muscle isoform	Mylpf	tr|A0A0U1RP93|A0A0U1RP93_MOUSE Myosin regulatory light chain 2, skeletal muscle isoform OS=Mus musculus OX=10090 GN=Mylpf PE=1 SV=1;sp|P97457|MLRS_MOUSE Myosin regulatory light chain 2, skeletal muscle isoform OS=Mus musculus OX=10090 GN=Mylpf PE=1 SV=3	2	2	2	2	2	0	0	0	0	0	0	0	0	2	0	0	0	0	0	0	0	0	2	0	0	0	0	0	0	0	0	17.4	17.4	17.4	16.881	149	149;169	0	9.5595
A0A0U1RPL0	ENSMUSG00000032637	233871	A0A0U1RPL0;Q7TQH0-3;Q7TQH0;Q7TQH0-2;Q3TGG2;E9Q5Q0;J3QP59	A0A0U1RPL0;Q7TQH0-3;Q7TQH0;Q7TQH0-2;Q3TGG2;E9Q5Q0	7;7;7;7;6;5;2	7;7;7;7;6;5;2	7;7;7;7;6;5;2	Ataxin-2-like protein	Atxn2l	tr|A0A0U1RPL0|A0A0U1RPL0_MOUSE Ataxin-2-like protein OS=Mus musculus OX=10090 GN=Atxn2l PE=1 SV=1;sp|Q7TQH0-3|ATX2L_MOUSE Isoform 3 of Ataxin-2-like protein OS=Mus musculus OX=10090 GN=Atxn2l;sp|Q7TQH0|ATX2L_MOUSE Ataxin-2-like protein OS=Mus musculus OX=1	7	7	7	7	3	2	3	4	1	1	2	5	3	3	2	3	4	1	1	2	5	3	3	2	3	4	1	1	2	5	3	8.8	8.8	8.8	115.26	1096	1096;1043;1049;1074;994;863;218	0	14.948
A0A140LHA2	ENSMUSG00000066979	12237	A0A140LHA2;Q9WVA3;A0A140LIM5;A0A140LI47;A0A140LJ21	A0A140LHA2;Q9WVA3;A0A140LIM5	4;4;2;1;1	4;4;2;1;1	4;4;2;1;1	Mitotic checkpoint protein BUB3	Bub3	tr|A0A140LHA2|A0A140LHA2_MOUSE Mitotic checkpoint protein BUB3 OS=Mus musculus OX=10090 GN=Bub3 PE=1 SV=1;sp|Q9WVA3|BUB3_MOUSE Mitotic checkpoint protein BUB3 OS=Mus musculus OX=10090 GN=Bub3 PE=1 SV=2;tr|A0A140LIM5|A0A140LIM5_MOUSE Mitotic checkpoint prot	5	4	4	4	2	4	2	2	2	2	2	1	2	2	4	2	2	2	2	2	1	2	2	4	2	2	2	2	2	1	2	14.2	14.2	14.2	36.766	324	324;326;184;100;220	0	7.9959
A0A140LIW6	ENSMUSG00000030726	67967	A0A140LIW6;A0A140LHY7;Q8BH76;Q9EQ28	A0A140LIW6;A0A140LHY7;Q8BH76;Q9EQ28	1;1;1;1	1;1;1;1	1;1;1;1	DNA polymerase delta subunit 3	Pold3	tr|A0A140LIW6|A0A140LIW6_MOUSE DNA polymerase delta subunit 3 (Fragment) OS=Mus musculus OX=10090 GN=Pold3 PE=1 SV=1;tr|A0A140LHY7|A0A140LHY7_MOUSE DNA polymerase delta subunit 3 OS=Mus musculus OX=10090 GN=Pold3 PE=1 SV=1;tr|Q8BH76|Q8BH76_MOUSE DNA polyme	4	1	1	1	1	1	1	1	0	0	0	1	0	1	1	1	1	0	0	0	1	0	1	1	1	1	0	0	0	1	0	5.2	5.2	5.2	28.998	269	269;422;461;462	0.0019947	3.083
A0A140LIU8	ENSMUSG00000096966	100416956	A0A140LIU8	A0A140LIU8	4	4	4	predicted gene, 18336	Gm18336	tr|A0A140LIU8|A0A140LIU8_MOUSE Predicted gene, 18336 OS=Mus musculus OX=10090 GN=Gm18336 PE=1 SV=1	1	4	4	4	3	3	2	2	2	2	2	4	4	3	3	2	2	2	2	2	4	4	3	3	2	2	2	2	2	4	4	10.8	10.8	10.8	78.791	765	765	0	38.417
A0A1B0GR11	ENSMUSG00000025503	21351	A0A1B0GR11;Q93092	A0A1B0GR11;Q93092	1;1	1;1	1;1	Transaldolase	Taldo1	tr|A0A1B0GR11|A0A1B0GR11_MOUSE Transaldolase OS=Mus musculus OX=10090 GN=Taldo1 PE=1 SV=1;sp|Q93092|TALDO_MOUSE Transaldolase OS=Mus musculus OX=10090 GN=Taldo1 PE=1 SV=2	2	1	1	1	0	1	0	0	0	0	0	0	0	0	1	0	0	0	0	0	0	0	0	1	0	0	0	0	0	0	0	3.4	3.4	3.4	42.151	382	382;337	0.0019854	3.0399
A0A1B0GR49	ENSMUSG00000003271	545963	A0A1B0GR49;A0A1B0GST5;O35400;O35400-2	A0A1B0GR49;A0A1B0GST5;O35400;O35400-2	1;1;1;1	1;1;1;1	1;1;1;1	Sulfotransferase family cytosolic 2B member 1	Sult2b1	tr|A0A1B0GR49|A0A1B0GR49_MOUSE Sulfotransferase OS=Mus musculus OX=10090 GN=Sult2b1 PE=1 SV=1;tr|A0A1B0GST5|A0A1B0GST5_MOUSE Sulfotransferase OS=Mus musculus OX=10090 GN=Sult2b1 PE=1 SV=1;sp|O35400|ST2B1_MOUSE Sulfotransferase 2B1 OS=Mus musculus OX=10090	4	1	1	1	0	1	0	0	0	0	0	0	0	0	1	0	0	0	0	0	0	0	0	1	0	0	0	0	0	0	0	3.5	3.5	3.5	41.731	370	370;372;338;373	0.0020148	3.1603
A0A1B0GRU8	ENSMUSG00000061136	56194	A0A1B0GRU8;A0A6Q6PUT5;Q9R1C7-2;Q9R1C7;E9QMI6;D3Z4N6;E9QP07;A0A0R4J1S2;Q80W14-2;Q80W14;Q80W14-3	A0A1B0GRU8;A0A6Q6PUT5;Q9R1C7-2;Q9R1C7	5;5;5;5;1;1;1;1;1;1;1	5;5;5;5;1;1;1;1;1;1;1	5;5;5;5;1;1;1;1;1;1;1	Pre-mRNA-processing factor 40 homolog A	Prpf40a	tr|A0A1B0GRU8|A0A1B0GRU8_MOUSE Pre-mRNA-processing factor 40 homolog A OS=Mus musculus OX=10090 GN=Prpf40a PE=1 SV=1;tr|A0A6Q6PUT5|A0A6Q6PUT5_MOUSE Pre-mRNA-processing factor 40 homolog A (Fragment) OS=Mus musculus OX=10090 GN=Prpf40a PE=1 SV=1;sp|Q9R1C7-2	11	5	5	5	3	3	2	1	2	0	2	2	1	3	3	2	1	2	0	2	2	1	3	3	2	1	2	0	2	2	1	5.9	5.9	5.9	105.53	926	926;966;911;953;852;857;870;873;557;870;873	0	16.389
Q91VI7	ENSMUSG00000038650	107702	Q91VI7;A0A1B0GSG5;A0A1B0GRG4	Q91VI7;A0A1B0GSG5;A0A1B0GRG4	2;2;1	2;2;1	2;2;1	Ribonuclease inhibitor	Rnh1	sp|Q91VI7|RINI_MOUSE Ribonuclease inhibitor OS=Mus musculus OX=10090 GN=Rnh1 PE=1 SV=1;tr|A0A1B0GSG5|A0A1B0GSG5_MOUSE Ribonuclease inhibitor OS=Mus musculus OX=10090 GN=Rnh1 PE=1 SV=1;tr|A0A1B0GRG4|A0A1B0GRG4_MOUSE Ribonuclease inhibitor (Fragment) OS=Mus	3	2	2	2	1	0	0	0	0	0	0	1	0	1	0	0	0	0	0	0	1	0	1	0	0	0	0	0	0	1	0	5.9	5.9	5.9	49.816	456	456;492;199	0.0019659	2.9357
A0A1B0GSR7	ENSMUSG00000019761	16661	A0A1B0GSR7	A0A1B0GSR7	1	1	1	keratin 10	Krt10	tr|A0A1B0GSR7|A0A1B0GSR7_MOUSE Keratin, type I cytoskeletal 10 OS=Mus musculus OX=10090 GN=Krt10 PE=1 SV=1	1	1	1	1	1	1	0	0	0	0	0	0	0	1	1	0	0	0	0	0	0	0	1	1	0	0	0	0	0	0	0	10.3	10.3	10.3	9.2657	97	97	0	6.3765
A0A1B0GSR9	ENSMUSG00000063229	16828	A0A1B0GSR9;A0A1B0GSX0;P06151;A0A1B0GT41;A0A1B0GQX5;D3YVR7;D3YZQ9;D3YZE4;P00342;A0A1B0GSL7;A0A1B0GSR2;A0A0N4SVV8;D3Z7F0;A0A1B0GRE9;A0A6I8MX27;P16125	A0A1B0GSR9;A0A1B0GSX0;P06151;A0A1B0GT41;A0A1B0GQX5;D3YVR7;D3YZQ9;D3YZE4;P00342	4;4;4;2;2;2;2;2;2;1;1;1;1;1;1;1	4;4;4;2;2;2;2;2;2;1;1;1;1;1;1;1	4;4;4;2;2;2;2;2;2;1;1;1;1;1;1;1	L-lactate dehydrogenase A chain;L-lactate dehydrogenase;L-lactate dehydrogenase C chain	Ldha;Ldhc	tr|A0A1B0GSR9|A0A1B0GSR9_MOUSE L-lactate dehydrogenase OS=Mus musculus OX=10090 GN=Ldha PE=1 SV=1;tr|A0A1B0GSX0|A0A1B0GSX0_MOUSE L-lactate dehydrogenase OS=Mus musculus OX=10090 GN=Ldha PE=1 SV=1;sp|P06151|LDHA_MOUSE L-lactate dehydrogenase A chain OS=Mus	16	4	4	4	2	3	2	1	0	0	1	2	1	2	3	2	1	0	0	1	2	1	2	3	2	1	0	0	1	2	1	13.3	13.3	13.3	34.599	315	315;361;332;176;201;235;236;236;332;128;171;193;198;274;341;334	0	12.792
A0A1B0GSX7	ENSMUSG00000063550	269966	A0A1B0GSX7;Q6PFD9;A0A1B0GRB5;A0A1B0GRA7;B2RQL0;A0A140T8J8;A0A1B0GS62	A0A1B0GSX7;Q6PFD9;A0A1B0GRB5;A0A1B0GRA7;B2RQL0;A0A140T8J8	4;4;3;3;3;3;1	4;4;3;3;3;3;1	4;4;3;3;3;3;1	Nuclear pore complex protein Nup98-Nup96;Nuclear pore complex protein Nup98;Nuclear pore complex protein Nup96	Nup98	tr|A0A1B0GSX7|A0A1B0GSX7_MOUSE Nuclear pore complex protein Nup96 OS=Mus musculus OX=10090 GN=Nup98 PE=1 SV=1;sp|Q6PFD9|NUP98_MOUSE Nuclear pore complex protein Nup98-Nup96 OS=Mus musculus OX=10090 GN=Nup98 PE=1 SV=2;tr|A0A1B0GRB5|A0A1B0GRB5_MOUSE Nuclear	7	4	4	4	2	0	0	0	1	1	1	1	2	2	0	0	0	1	1	1	1	2	2	0	0	0	1	1	1	1	2	3.5	3.5	3.5	197.31	1816	1816;1816;967;984;1170;1187;230	0	6.4896
A0A1B0GT66	ENSMUSG00000110040		A0A1B0GT66;F6Y6L6;F8WIR1;P18242	A0A1B0GT66;F6Y6L6;F8WIR1;P18242	2;2;2;2	2;2;2;2	2;2;2;2	Cathepsin D	Ctsd	tr|A0A1B0GT66|A0A1B0GT66_MOUSE Predicted gene, 49369 (Fragment) OS=Mus musculus OX=10090 GN=Gm49369 PE=1 SV=1;tr|F6Y6L6|F6Y6L6_MOUSE Predicted gene, 49369 (Fragment) OS=Mus musculus OX=10090 GN=Gm49369 PE=1 SV=1;tr|F8WIR1|F8WIR1_MOUSE Cathepsin D OS=Mus mu	4	2	2	2	0	1	0	0	0	1	0	0	0	0	1	0	0	0	1	0	0	0	0	1	0	0	0	1	0	0	0	13.2	13.2	13.2	29.299	273	273;278;404;410	0.0014358	4.1109
Q9Z2V5	ENSMUSG00000031161	15185	Q9Z2V5;A0A1B0GX25;B1AUA8	Q9Z2V5;A0A1B0GX25;B1AUA8	3;3;2	3;3;2	3;3;2	Histone deacetylase 6	Hdac6	sp|Q9Z2V5|HDAC6_MOUSE Histone deacetylase 6 OS=Mus musculus OX=10090 GN=Hdac6 PE=1 SV=3;tr|A0A1B0GX25|A0A1B0GX25_MOUSE Histone deacetylase 6 (Fragment) OS=Mus musculus OX=10090 GN=Hdac6 PE=1 SV=1;tr|B1AUA8|B1AUA8_MOUSE Histone deacetylase 6 (Fragment) OS=M	3	3	3	3	1	0	2	1	1	1	2	2	3	1	0	2	1	1	1	2	2	3	1	0	2	1	1	1	2	2	3	3.5	3.5	3.5	125.79	1149	1149;1008;197	0	14.988
A0A1C7CYV0	ENSMUSG00000016382	102866	A0A1C7CYV0;B1AX58;Q99K51;Q3V0K9	A0A1C7CYV0;B1AX58;Q99K51	13;13;13;2	13;13;13;2	9;9;9;1	Plastin-3	Pls3	tr|A0A1C7CYV0|A0A1C7CYV0_MOUSE Plastin-3 (Fragment) OS=Mus musculus OX=10090 GN=Pls3 PE=1 SV=1;tr|B1AX58|B1AX58_MOUSE Plastin-3 OS=Mus musculus OX=10090 GN=Pls3 PE=1 SV=1;sp|Q99K51|PLST_MOUSE Plastin-3 OS=Mus musculus OX=10090 GN=Pls3 PE=1 SV=3	4	13	13	9	0	13	0	0	0	0	0	0	0	0	13	0	0	0	0	0	0	0	0	9	0	0	0	0	0	0	0	25.8	25.8	19.4	70.642	629	629;639;630;630	0	64.257
G5E8I8	ENSMUSG00000052488	27967	G5E8I8;A0A1D5RL92;Q8CGZ0	G5E8I8;A0A1D5RL92;Q8CGZ0	3;3;3	3;3;3	3;3;3	Calcium homeostasis endoplasmic reticulum protein	Cherp	tr|G5E8I8|G5E8I8_MOUSE Calcium homeostasis endoplasmic reticulum protein OS=Mus musculus OX=10090 GN=Cherp PE=1 SV=2;tr|A0A1D5RL92|A0A1D5RL92_MOUSE Calcium homeostasis endoplasmic reticulum protein OS=Mus musculus OX=10090 GN=Cherp PE=1 SV=1;sp|Q8CGZ0|CHER	3	3	3	3	1	0	0	0	0	1	0	1	2	1	0	0	0	0	1	0	1	2	1	0	0	0	0	1	0	1	2	3.9	3.9	3.9	107.67	949	949;938;936	0	7.7948
A0A1D5RMB4	ENSMUSG00000024384	73473	A0A1D5RMB4;A0A1D5RLV0;Q8C1D8	A0A1D5RMB4;A0A1D5RLV0;Q8C1D8	5;5;5	5;5;5	5;5;5	Protein IWS1 homolog	Iws1	tr|A0A1D5RMB4|A0A1D5RMB4_MOUSE Protein IWS1 homolog (Fragment) OS=Mus musculus OX=10090 GN=Iws1 PE=1 SV=1;tr|A0A1D5RLV0|A0A1D5RLV0_MOUSE Protein IWS1 homolog OS=Mus musculus OX=10090 GN=Iws1 PE=1 SV=1;sp|Q8C1D8|IWS1_MOUSE Protein IWS1 homolog OS=Mus muscul	3	5	5	5	3	1	4	1	1	2	0	1	1	3	1	4	1	1	2	0	1	1	3	1	4	1	1	2	0	1	1	27.3	27.3	27.3	22.57	198	198;765;766	0	10.237
A0A1D5RLY6	ENSMUSG00000019261	270058	A0A1D5RLY6;Q8C052;A0A1D5RML0;A0A1D5RMF1;A0A1D5RMG7	A0A1D5RLY6;Q8C052	3;3;1;1;1	3;3;1;1;1	3;3;1;1;1	Microtubule-associated protein 1S;MAP1S heavy chain;MAP1S light chain	Map1s	tr|A0A1D5RLY6|A0A1D5RLY6_MOUSE Microtubule-associated protein 1S OS=Mus musculus OX=10090 GN=Map1s PE=1 SV=1;sp|Q8C052|MAP1S_MOUSE Microtubule-associated protein 1S OS=Mus musculus OX=10090 GN=Map1s PE=1 SV=2	5	3	3	3	1	0	1	0	0	1	1	0	1	1	0	1	0	0	1	1	0	1	1	0	1	0	0	1	1	0	1	5.1	5.1	5.1	91.025	864	864;973;79;133;239	0	6.751
F6YAM1	ENSMUSG00000059897	234358	F6YAM1;A0A1D5RM15;Q6NZI9;E9Q1J0;Q7TSI0-2;Q7TSI0	F6YAM1;A0A1D5RM15;Q6NZI9;E9Q1J0;Q7TSI0-2;Q7TSI0	2;2;2;1;1;1	1;1;1;1;1;1	1;1;1;1;1;1	Zinc finger protein 12	Zfp930;Zfp180;Zfp558;Znf12	tr|F6YAM1|F6YAM1_MOUSE Zinc finger protein 930 OS=Mus musculus OX=10090 GN=Zfp930 PE=1 SV=1;tr|A0A1D5RM15|A0A1D5RM15_MOUSE Zinc finger protein 930 OS=Mus musculus OX=10090 GN=Zfp930 PE=1 SV=1;tr|Q6NZI9|Q6NZI9_MOUSE Zinc finger protein 180 OS=Mus musculus O	6	2	1	1	1	1	1	1	2	1	1	1	2	0	0	0	0	1	0	0	0	1	0	0	0	0	1	0	0	0	1	20.5	17	17	50.926	440	440;441;655;407;654;686	0.0014245	3.9834
A0A1D5RM74	ENSMUSG00000046707	13000	A0A1D5RM74;O54833;A0A1D5RM55;A0A1D5RLE4	A0A1D5RM74;O54833;A0A1D5RM55;A0A1D5RLE4	3;3;2;2	3;3;2;2	3;3;2;2	Casein kinase II subunit alpha	Csnk2a2	tr|A0A1D5RM74|A0A1D5RM74_MOUSE Casein kinase II subunit alpha (Fragment) OS=Mus musculus OX=10090 GN=Csnk2a2 PE=1 SV=1;sp|O54833|CSK22_MOUSE Casein kinase II subunit alpha OS=Mus musculus OX=10090 GN=Csnk2a2 PE=1 SV=1;tr|A0A1D5RM55|A0A1D5RM55_MOUSE Casei	4	3	3	3	2	0	2	2	1	1	0	0	0	2	0	2	2	1	1	0	0	0	2	0	2	2	1	1	0	0	0	21.7	21.7	21.7	27.878	235	235;350;121;238	0	9.7741
A0A1D5RM85	ENSMUSG00000045128	76808	A0A1D5RM85;P62717;A0A1D5RLW5;A0A1D5RME4;A0A1D5RMC7	A0A1D5RM85;P62717;A0A1D5RLW5;A0A1D5RME4	8;8;7;5;3	8;8;7;5;3	3;3;3;3;0	60S ribosomal protein L18a	Rpl18a	tr|A0A1D5RM85|A0A1D5RM85_MOUSE 60S ribosomal protein L18a (Fragment) OS=Mus musculus OX=10090 GN=Rpl18a PE=1 SV=1;sp|P62717|RL18A_MOUSE 60S ribosomal protein L18a OS=Mus musculus OX=10090 GN=Rpl18a PE=1 SV=1;tr|A0A1D5RLW5|A0A1D5RLW5_MOUSE 60S ribosomal pro	5	8	8	3	8	8	8	8	8	8	7	8	8	8	8	8	8	8	8	7	8	8	3	3	3	3	3	3	2	3	3	35.2	35.2	13.2	24.638	219	219;176;147;123;70	0	323.31
A0A1I7Q4A6	ENSMUSG00000023919	83815	A0A1I7Q4A6;Q9CPQ5;Q9CPQ5-2	A0A1I7Q4A6;Q9CPQ5	5;5;1	5;5;1	5;5;1	Centromere protein Q	Cenpq	tr|A0A1I7Q4A6|A0A1I7Q4A6_MOUSE Centromere protein Q OS=Mus musculus OX=10090 GN=Cenpq PE=1 SV=1;sp|Q9CPQ5|CENPQ_MOUSE Centromere protein Q OS=Mus musculus OX=10090 GN=Cenpq PE=2 SV=2	3	5	5	5	2	0	2	4	3	2	4	2	1	2	0	2	4	3	2	4	2	1	2	0	2	4	3	2	4	2	1	20.8	20.8	20.8	30.76	269	269;267;126	0	11.185
A0A1L1SQA8	ENSMUSG00000009927	75617	A0A1L1SQA8;P62852	A0A1L1SQA8;P62852	4;4	4;4	4;4	40S ribosomal protein S25	Rps25	tr|A0A1L1SQA8|A0A1L1SQA8_MOUSE 40S ribosomal protein S25 OS=Mus musculus OX=10090 GN=Rps25 PE=1 SV=1;sp|P62852|RS25_MOUSE 40S ribosomal protein S25 OS=Mus musculus OX=10090 GN=Rps25 PE=1 SV=1	2	4	4	4	3	3	3	4	3	4	4	4	4	3	3	3	4	3	4	4	4	4	3	3	3	4	3	4	4	4	4	32.3	32.3	32.3	10.309	93	93;125	0	14.286
Q9CQT2	ENSMUSG00000042396	67010	Q9CQT2;A0A1L1SRC3;A0A1L1SUJ3	Q9CQT2;A0A1L1SRC3;A0A1L1SUJ3	2;2;1	2;2;1	2;2;1	RNA-binding protein 7	Rbm7	sp|Q9CQT2|RBM7_MOUSE RNA-binding protein 7 OS=Mus musculus OX=10090 GN=Rbm7 PE=1 SV=1;tr|A0A1L1SRC3|A0A1L1SRC3_MOUSE RNA-binding protein 7 OS=Mus musculus OX=10090 GN=Rbm7 PE=1 SV=1;tr|A0A1L1SUJ3|A0A1L1SUJ3_MOUSE RNA-binding protein 7 OS=Mus musculus OX=10	3	2	2	2	1	0	2	1	0	0	1	0	1	1	0	2	1	0	0	1	0	1	1	0	2	1	0	0	1	0	1	7.5	7.5	7.5	30.148	265	265;158;39	0.0014215	3.9049
A0A1L1SRP4	ENSMUSG00000032254	71819	A0A1L1SRP4;E9Q5G3	A0A1L1SRP4;E9Q5G3	2;2	2;2	2;2	Kinesin-like protein KIF23	Kif23	tr|A0A1L1SRP4|A0A1L1SRP4_MOUSE Kinesin-like protein (Fragment) OS=Mus musculus OX=10090 GN=Kif23 PE=1 SV=1;sp|E9Q5G3|KIF23_MOUSE Kinesin-like protein KIF23 OS=Mus musculus OX=10090 GN=Kif23 PE=1 SV=1	2	2	2	2	0	1	1	2	1	0	1	0	2	0	1	1	2	1	0	1	0	2	0	1	1	2	1	0	1	0	2	5.2	5.2	5.2	64.165	563	563;953	0	5.5493
A0A1L1SRS6	ENSMUSG00000032549	270192	A0A1L1SRS6;D3YV69;P61294;P35279-2;P35279;Q8BHD0	A0A1L1SRS6;D3YV69;P61294;P35279-2;P35279;Q8BHD0	2;2;2;2;2;1	2;2;2;2;2;1	2;2;2;2;2;1	Ras-related protein Rab-6B;Ras-related protein Rab-6A;Ras-related protein Rab-39A	Rab6a;Rab6b;Rab39a	tr|A0A1L1SRS6|A0A1L1SRS6_MOUSE Ras-related protein Rab-6B OS=Mus musculus OX=10090 GN=Rab6b PE=1 SV=1;tr|D3YV69|D3YV69_MOUSE Ras-related protein Rab-6A OS=Mus musculus OX=10090 GN=Rab6a PE=1 SV=1;sp|P61294|RAB6B_MOUSE Ras-related protein Rab-6B OS=Mus musc	6	2	2	2	1	2	1	1	1	1	1	1	1	1	2	1	1	1	1	1	1	1	1	2	1	1	1	1	1	1	1	28.8	28.8	28.8	9.3244	80	80;175;208;208;208;217	0	8.0143
A0A1L1SS93	ENSMUSG00000072244	94088	A0A1L1SS93;Q8BGE7	A0A1L1SS93;Q8BGE7	2;2	2;2	2;2	Tripartite motif-containing protein 6	Trim6	tr|A0A1L1SS93|A0A1L1SS93_MOUSE Tripartite motif-containing protein 6 OS=Mus musculus OX=10090 GN=Trim6 PE=1 SV=1;sp|Q8BGE7|TRIM6_MOUSE Tripartite motif-containing protein 6 OS=Mus musculus OX=10090 GN=Trim6 PE=1 SV=1	2	2	2	2	1	1	1	1	1	1	1	1	1	1	1	1	1	1	1	1	1	1	1	1	1	1	1	1	1	1	1	4.8	4.8	4.8	53.281	462	462;488	0	5.626
J3QN87	ENSMUSG00000035530	20918	J3QN87;A0A1L1SSA3;J3QPZ8;Q9CXU9;P48024	J3QN87;A0A1L1SSA3;J3QPZ8;Q9CXU9;P48024	1;1;1;1;1	1;1;1;1;1	1;1;1;1;1	Eukaryotic translation initiation factor 1b;Eukaryotic translation initiation factor 1	Eif1;Eif1b	tr|J3QN87|J3QN87_MOUSE Eukaryotic translation initiation factor 1 (Fragment) OS=Mus musculus OX=10090 GN=Eif1 PE=3 SV=1;tr|A0A1L1SSA3|A0A1L1SSA3_MOUSE Eukaryotic translation initiation factor 1b (Fragment) OS=Mus musculus OX=10090 GN=Eif1b PE=1 SV=1;tr|J3Q	5	1	1	1	0	1	0	0	0	0	0	0	0	0	1	0	0	0	0	0	0	0	0	1	0	0	0	0	0	0	0	15.6	15.6	15.6	10.245	90	90;100;110;113;113	0.0020353	3.2607
A0A1L1SSK2	ENSMUSG00000074476	67629	A0A1L1SSK2	A0A1L1SSK2	1	1	1	SPC24, NDC80 kinetochore complex component, homolog (S. cerevisiae)	Spc24	tr|A0A1L1SSK2|A0A1L1SSK2_MOUSE Kinetochore protein Spc24 (Fragment) OS=Mus musculus OX=10090 GN=Spc24 PE=1 SV=1	1	1	1	1	0	0	0	0	0	1	0	0	0	0	0	0	0	0	1	0	0	0	0	0	0	0	0	1	0	0	0	16.7	16.7	16.7	5.0825	42	42	1	-2
A0A1L1STE6	ENSMUSG00000032279	67834	A0A1L1STE6;Q9D6R2-2;Q9D6R2	A0A1L1STE6;Q9D6R2-2;Q9D6R2	1;1;1	1;1;1	1;1;1	Isocitrate dehydrogenase [NAD] subunit alpha, mitochondrial	Idh3a	tr|A0A1L1STE6|A0A1L1STE6_MOUSE Isocitrate dehydrogenase [NAD] subunit, mitochondrial OS=Mus musculus OX=10090 GN=Idh3a PE=1 SV=1;sp|Q9D6R2-2|IDH3A_MOUSE Isoform 2 of Isocitrate dehydrogenase [NAD] subunit alpha, mitochondrial OS=Mus musculus OX=10090 GN=Id	3	1	1	1	0	1	0	0	0	0	0	0	0	0	1	0	0	0	0	0	0	0	0	1	0	0	0	0	0	0	0	2.6	2.6	2.6	41.52	384	384;288;366	0.0051184	2.7439
A0A1L1SV25	ENSMUSG00000054808	60595	A0A1L1SV25;P57780;E9Q2W9;A0A1L1SVJ6;D3Z0L8;D3Z761;Q91ZE6;E9PX29	A0A1L1SV25;P57780;E9Q2W9	35;35;20;11;8;6;1;1	35;35;20;11;8;6;1;1	21;21;9;8;5;3;1;1	Alpha-actinin-4	Actn4	tr|A0A1L1SV25|A0A1L1SV25_MOUSE Alpha-actinin-4 OS=Mus musculus OX=10090 GN=Actn4 PE=1 SV=1;sp|P57780|ACTN4_MOUSE Alpha-actinin-4 OS=Mus musculus OX=10090 GN=Actn4 PE=1 SV=1;tr|E9Q2W9|E9Q2W9_MOUSE Alpha-actinin-4 (Fragment) OS=Mus musculus OX=10090 GN=Actn4	8	35	35	21	3	33	0	0	0	0	0	1	0	3	33	0	0	0	0	0	1	0	0	21	0	0	0	0	0	0	0	43.5	43.5	27.6	107.11	932	932;912;518;323;206;133;2555;2561	0	235.11
A0A1S6GWJ4	ENSMUSG00000021494	72935	A0A1S6GWJ4;Q91VN6	A0A1S6GWJ4;Q91VN6	7;7	7;7	7;7	Probable ATP-dependent RNA helicase DDX41	Ddx41	tr|A0A1S6GWJ4|A0A1S6GWJ4_MOUSE RNA helicase OS=Mus musculus OX=10090 GN=Ddx41 PE=1 SV=1;sp|Q91VN6|DDX41_MOUSE Probable ATP-dependent RNA helicase DDX41 OS=Mus musculus OX=10090 GN=Ddx41 PE=1 SV=2	2	7	7	7	1	1	2	1	1	3	2	2	4	1	1	2	1	1	3	2	2	4	1	1	2	1	1	3	2	2	4	14.1	14.1	14.1	71.1	633	633;622	0	14.915
A0A1W2P6F6	ENSMUSG00000090841	17904	A0A1W2P6F6;A0A1W2P7Q9;Q60605-2;Q60605;A0A1W2P6G5;Q8CI43	A0A1W2P6F6;A0A1W2P7Q9;Q60605-2;Q60605;A0A1W2P6G5	7;7;7;7;5;1	7;7;7;7;5;1	7;7;7;7;5;1	Myosin light polypeptide 6	Myl6	tr|A0A1W2P6F6|A0A1W2P6F6_MOUSE Myosin light polypeptide 6 OS=Mus musculus OX=10090 GN=Myl6 PE=1 SV=1;tr|A0A1W2P7Q9|A0A1W2P7Q9_MOUSE Myosin light polypeptide 6 OS=Mus musculus OX=10090 GN=Myl6 PE=1 SV=1;sp|Q60605-2|MYL6_MOUSE Isoform Smooth muscle of Myosin	6	7	7	7	1	7	1	1	1	0	0	1	0	1	7	1	1	1	0	0	1	0	1	7	1	1	1	0	0	1	0	53.9	53.9	53.9	17.005	152	152;158;151;151;139;207	0	25.604
A0A1W2P720	ENSMUSG00000020088	20224	A0A1W2P720;A0A1W2P869;A0A1W2P6N3;Q99JZ4;Q9CQC9;P36536	A0A1W2P720;A0A1W2P869;A0A1W2P6N3;Q99JZ4;Q9CQC9;P36536	1;1;1;1;1;1	1;1;1;1;1;1	1;1;1;1;1;1	GTP-binding protein SAR1b;GTP-binding protein SAR1a	Sar1a;Sar1b	tr|A0A1W2P720|A0A1W2P720_MOUSE GTP-binding protein SAR1a (Fragment) OS=Mus musculus OX=10090 GN=Sar1a PE=1 SV=1;tr|A0A1W2P869|A0A1W2P869_MOUSE GTP-binding protein SAR1a (Fragment) OS=Mus musculus OX=10090 GN=Sar1a PE=1 SV=1;tr|A0A1W2P6N3|A0A1W2P6N3_MOUSE G	6	1	1	1	1	1	1	1	0	1	1	1	1	1	1	1	1	0	1	1	1	1	1	1	1	1	0	1	1	1	1	13.6	13.6	13.6	9.0914	81	81;95;131;198;198;198	0.0013736	3.3822
F8VPM0	ENSMUSG00000040054	116848	F8VPM0;E9Q374;A0A5F8MPQ7;A0A1W2P6X9;Q91YE5-2;Q91YE5;Q91YE5-3;A0A1W2P6L0	F8VPM0;E9Q374;A0A5F8MPQ7;A0A1W2P6X9;Q91YE5-2;Q91YE5;Q91YE5-3	26;26;26;26;25;25;25;6	26;26;26;26;25;25;25;6	26;26;26;26;25;25;25;6	Bromodomain adjacent to zinc finger domain protein 2A	Baz2a	tr|F8VPM0|F8VPM0_MOUSE Bromodomain adjacent to zinc finger domain protein 2A OS=Mus musculus OX=10090 GN=Baz2a PE=1 SV=1;tr|E9Q374|E9Q374_MOUSE Bromodomain adjacent to zinc finger domain protein 2A OS=Mus musculus OX=10090 GN=Baz2a PE=1 SV=1;tr|A0A5F8MPQ7|	8	26	26	26	9	9	8	16	9	9	13	13	16	9	9	8	16	9	9	13	13	16	9	9	8	16	9	9	13	13	16	17.8	17.8	17.8	209.4	1887	1887;1888;1889;1890;1888;1889;1890;763	0	98.962
A0A1W2P768	ENSMUSG00000093769	15077	A0A1W2P768;P84228;F8WI35;E0CYN1;E0CYR7	A0A1W2P768;P84228;F8WI35	6;6;5;2;2	1;1;0;0;0	1;1;0;0;0	Histone H3.2;Histone H3	Hist1h3b;H3f3a	tr|A0A1W2P768|A0A1W2P768_MOUSE Histone H3.2 OS=Mus musculus OX=10090 GN=H3c14 PE=1 SV=1;sp|P84228|H32_MOUSE Histone H3.2 OS=Mus musculus OX=10090 GN=H3c2 PE=1 SV=2;tr|F8WI35|F8WI35_MOUSE Histone H3 OS=Mus musculus OX=10090 GN=H3f3a PE=1 SV=1	5	6	1	1	5	4	5	6	4	5	6	4	6	1	0	1	1	1	1	1	1	1	1	0	1	1	1	1	1	1	1	34.3	17.7	17.7	20.246	181	181;136;135;52;55	0	176.98
Q6ZWZ6	ENSMUSG00000061983	20042	Q6ZWZ6;F7AEH4;A0A1W2P7A1;P63323	Q6ZWZ6;F7AEH4;A0A1W2P7A1;P63323	5;5;5;4	5;5;5;4	5;5;5;4	40S ribosomal protein S12	Rps12	tr|Q6ZWZ6|Q6ZWZ6_MOUSE 40S ribosomal protein S12 OS=Mus musculus OX=10090 GN=Rps12 PE=1 SV=1;tr|F7AEH4|F7AEH4_MOUSE 40S ribosomal protein S12 OS=Mus musculus OX=10090 GN=Rps12 PE=1 SV=1;tr|A0A1W2P7A1|A0A1W2P7A1_MOUSE 40S ribosomal protein S12 OS=Mus muscul	4	5	5	5	3	2	4	4	4	4	4	4	4	3	2	4	4	4	4	4	4	4	3	2	4	4	4	4	4	4	4	45.5	45.5	45.5	14.515	132	132;137;148;132	0	36.821
Q9CQE6	ENSMUSG00000019857	66403	Q9CQE6;A0A1W2P7K2;A0A1W2P7E1	Q9CQE6;A0A1W2P7K2	3;3;1	3;3;1	2;2;1	Histone chaperone ASF1A	Asf1a	sp|Q9CQE6|ASF1A_MOUSE Histone chaperone ASF1A OS=Mus musculus OX=10090 GN=Asf1a PE=1 SV=1;tr|A0A1W2P7K2|A0A1W2P7K2_MOUSE Histone chaperone ASF1A OS=Mus musculus OX=10090 GN=Asf1a PE=1 SV=1	3	3	3	2	2	2	2	3	3	2	2	3	1	2	2	2	3	3	2	2	3	1	1	1	1	2	2	1	1	2	1	16.7	16.7	12.7	22.942	204	204;134;118	0	13.058
A0A1W2P7L7	ENSMUSG00000037361	66055	A0A1W2P7L7;P59708	A0A1W2P7L7;P59708	2;2	2;2	2;2	Splicing factor 3B subunit 6	Sf3b6	tr|A0A1W2P7L7|A0A1W2P7L7_MOUSE Splicing factor 3B subunit 6 (Fragment) OS=Mus musculus OX=10090 GN=Sf3b6 PE=1 SV=1;sp|P59708|SF3B6_MOUSE Splicing factor 3B subunit 6 OS=Mus musculus OX=10090 GN=Sf3b6 PE=1 SV=1	2	2	2	2	2	2	2	2	1	1	2	2	2	2	2	2	2	1	1	2	2	2	2	2	2	2	1	1	2	2	2	23.4	23.4	23.4	13.037	111	111;125	0	5.626
A0A1W2P7Q6	ENSMUSG00000034667	73192	A0A1W2P7Q6;Q9CRT8	A0A1W2P7Q6;Q9CRT8	2;2	2;2	2;2	Exportin-T	Xpot	tr|A0A1W2P7Q6|A0A1W2P7Q6_MOUSE Exportin-T OS=Mus musculus OX=10090 GN=Xpot PE=1 SV=1;sp|Q9CRT8|XPOT_MOUSE Exportin-T OS=Mus musculus OX=10090 GN=Xpot PE=1 SV=3	2	2	2	2	1	0	0	1	0	0	1	2	0	1	0	0	1	0	0	1	2	0	1	0	0	1	0	0	1	2	0	2.7	2.7	2.7	109.79	962	962;963	0	4.9695
A0A1W2P7X3	ENSMUSG00000044573	11431	A0A1W2P7X3;Q561M1;Q9D358-2;Q9D358	A0A1W2P7X3;Q561M1;Q9D358-2;Q9D358	1;1;1;1	1;1;1;1	1;1;1;1	Low molecular weight phosphotyrosine protein phosphatase	Acp1	tr|A0A1W2P7X3|A0A1W2P7X3_MOUSE Acid phosphatase OS=Mus musculus OX=10090 GN=Acp1 PE=1 SV=1;tr|Q561M1|Q561M1_MOUSE Low molecular weight cytosolic acid phosphatase OS=Mus musculus OX=10090 GN=Acp1 PE=1 SV=1;sp|Q9D358-2|PPAC_MOUSE Isoform 2 of Low molecular w	4	1	1	1	0	0	0	0	0	0	0	1	1	0	0	0	0	0	0	0	1	1	0	0	0	0	0	0	0	1	1	7.9	7.9	7.9	12.562	114	114;158;158;158	0.0020408	3.3021
A0A1Y7VM54	ENSMUSG00000021248	68581	A0A1Y7VM54;Q9D1D4	A0A1Y7VM54;Q9D1D4	1;1	1;1	1;1	Transmembrane emp24 domain-containing protein 10	Tmed10	tr|A0A1Y7VM54|A0A1Y7VM54_MOUSE Transmembrane emp24 domain-containing protein 10 OS=Mus musculus OX=10090 GN=Tmed10 PE=1 SV=1;sp|Q9D1D4|TMEDA_MOUSE Transmembrane emp24 domain-containing protein 10 OS=Mus musculus OX=10090 GN=Tmed10 PE=1 SV=1	2	1	1	1	0	1	0	0	0	0	0	0	0	0	1	0	0	0	0	0	0	0	0	1	0	0	0	0	0	0	0	9.5	9.5	9.5	13.814	116	116;219	0.0050955	2.699
E9Q5C9-2	ENSMUSG00000015176	70769	E9Q5C9-2;A0A286YDA2;A0A286YDT3;E9Q5C9;A0A286YDV7;A0A286YCD1;A0A286YDZ1	E9Q5C9-2;A0A286YDA2;A0A286YDT3;E9Q5C9;A0A286YDV7	12;12;12;12;12;3;2	12;12;12;12;12;3;2	12;12;12;12;12;3;2	nucleolar and coiled-body phosphoprotein 1	Nolc1	sp|E9Q5C9-2|NOLC1_MOUSE Isoform 2 of Nucleolar and coiled-body phosphoprotein 1 OS=Mus musculus OX=10090 GN=Nolc1;tr|A0A286YDA2|A0A286YDA2_MOUSE Nucleolar and coiled-body phosphoprotein 1 OS=Mus musculus OX=10090 GN=Nolc1 PE=1 SV=1;tr|A0A286YDT3|A0A286YDT3	7	12	12	12	11	6	10	5	6	3	5	4	6	11	6	10	5	6	3	5	4	6	11	6	10	5	6	3	5	4	6	19.3	19.3	19.3	69.272	664	664;700;701;702;702;197;36	0	86.331
A0A286YDI8	ENSMUSG00000039367	218811	A0A286YDI8;G3X972	A0A286YDI8;G3X972	2;2	2;2	2;2	Sec24 related gene family, member C (S. cerevisiae)	Sec24c	tr|A0A286YDI8|A0A286YDI8_MOUSE Sec24-related gene family, member C (S. cerevisiae) OS=Mus musculus OX=10090 GN=Sec24c PE=1 SV=1;tr|G3X972|G3X972_MOUSE Sec24-related gene family, member C (S. cerevisiae) OS=Mus musculus OX=10090 GN=Sec24c PE=1 SV=1	2	2	2	2	0	2	0	0	0	0	0	0	0	0	2	0	0	0	0	0	0	0	0	2	0	0	0	0	0	0	0	3.4	3.4	3.4	111.61	1020	1020;1096	0.0032362	2.8474
A0A286YDS5	ENSMUSG00000058569	67511	A0A286YDS5;Q99KF1	A0A286YDS5;Q99KF1	2;2	2;2	2;2	Transmembrane emp24 domain-containing protein 9	Tmed9	tr|A0A286YDS5|A0A286YDS5_MOUSE Transmembrane emp24 domain-containing protein 9 OS=Mus musculus OX=10090 GN=Tmed9 PE=1 SV=1;sp|Q99KF1|TMED9_MOUSE Transmembrane emp24 domain-containing protein 9 OS=Mus musculus OX=10090 GN=Tmed9 PE=1 SV=2	2	2	2	2	1	2	1	1	1	1	0	1	1	1	2	1	1	1	1	0	1	1	1	2	1	1	1	1	0	1	1	14.8	14.8	14.8	24.597	209	209;235	0	11.899
E9Q784	ENSMUSG00000022000	67302	E9Q784;A0A2I3BPQ5	E9Q784;A0A2I3BPQ5	1;1	1;1	1;1	zinc finger CCCH type containing 13	Zc3h13	sp|E9Q784|ZC3HD_MOUSE Zinc finger CCCH domain-containing protein 13 OS=Mus musculus OX=10090 GN=Zc3h13 PE=1 SV=1;tr|A0A2I3BPQ5|A0A2I3BPQ5_MOUSE Zinc finger CCCH domain-containing protein 13 OS=Mus musculus OX=10090 GN=Zc3h13 PE=1 SV=1	2	1	1	1	1	1	1	1	1	1	1	1	1	1	1	1	1	1	1	1	1	1	1	1	1	1	1	1	1	1	1	0.8	0.8	0.8	203.75	1729	1729;1730	0.0020161	3.1747
A0A2I3BQH2	ENSMUSG00000021871		A0A2I3BQH2;Q543K9;Q9D8C9;P23492	A0A2I3BQH2;Q543K9;Q9D8C9;P23492	1;1;1;1	1;1;1;1	1;1;1;1	Purine nucleoside phosphorylase	Pnp;Pnp2	tr|A0A2I3BQH2|A0A2I3BQH2_MOUSE Inosine phosphorylase (Fragment) OS=Mus musculus OX=10090 GN=Gm49342 PE=1 SV=1;tr|Q543K9|Q543K9_MOUSE Purine nucleoside phosphorylase OS=Mus musculus OX=10090 GN=Pnp PE=1 SV=1;tr|Q9D8C9|Q9D8C9_MOUSE Purine nucleoside phosphor	4	1	1	1	0	1	0	0	0	0	0	0	0	0	1	0	0	0	0	0	0	0	0	1	0	0	0	0	0	0	0	4	4	4	27.716	250	250;289;305;289	0.008125	2.5493
E9PZM7	ENSMUSG00000033228	72193	E9PZM7;A0A2I3BQU5;A0A2I3BRQ7	E9PZM7;A0A2I3BQU5;A0A2I3BRQ7	3;3;2	3;3;2	3;3;2	SR-related CTD-associated factor 11	Scaf11	tr|E9PZM7|E9PZM7_MOUSE SR-related CTD-associated factor 11 OS=Mus musculus OX=10090 GN=Scaf11 PE=1 SV=1;tr|A0A2I3BQU5|A0A2I3BQU5_MOUSE SR-related CTD-associated factor 11 OS=Mus musculus OX=10090 GN=Scaf11 PE=1 SV=1;tr|A0A2I3BRQ7|A0A2I3BRQ7_MOUSE SR-relate	3	3	3	3	1	1	2	3	1	0	1	1	1	1	1	2	3	1	0	1	1	1	1	1	2	3	1	0	1	1	1	2.8	2.8	2.8	162.1	1456	1456;1389;476	0	6.8233
Q8BP71	ENSMUSG00000033565	93686	Q8BP71;A0A2R8VI79;A0A2I3BRA9;A0A2R8W6K5;A0A2I3BRU6;A0A2K6EDK7;A0A2R8VK79;Q9JJ43-4;Q8BP71-3;Q9JJ43-6;Q9JJ43;Q8BP71-7;Q9JJ43-3;Q8BP71-2;Q8BP71-5;Q8BP71-8;Q9JJ43-5;Q9JJ43-2;Q8BP71-6;Q8BIF2;Q9JJ43-7;Q8BIF2-2;Q8BP71-4;A0A2I3BR20;Q8BIF2-3;Q8BIF2-5;Q8BIF2-4;A2A4W9	Q8BP71;A0A2R8VI79;A0A2I3BRA9;A0A2R8W6K5;A0A2I3BRU6;A0A2K6EDK7;A0A2R8VK79;Q9JJ43-4;Q8BP71-3;Q9JJ43-6;Q9JJ43;Q8BP71-7;Q9JJ43-3;Q8BP71-2;Q8BP71-5;Q8BP71-8;Q9JJ43-5;Q9JJ43-2;Q8BP71-6;Q8BIF2;Q9JJ43-7;Q8BIF2-2;Q8BP71-4;A0A2I3BR20;Q8BIF2-3;Q8BIF2-5;Q8BIF2-4;A2A4W9	2;2;2;2;2;2;2;2;2;2;2;2;2;2;2;2;2;2;2;1;1;1;1;1;1;1;1;1	2;2;2;2;2;2;2;2;2;2;2;2;2;2;2;2;2;2;2;1;1;1;1;1;1;1;1;1	2;2;2;2;2;2;2;2;2;2;2;2;2;2;2;2;2;2;2;1;1;1;1;1;1;1;1;1	RNA binding protein fox-1 homolog 2;RNA binding protein fox-1 homolog 1;RNA binding protein fox-1 homolog 3	Rbfox2;Rbfox1;Rbfox3	sp|Q8BP71|RFOX2_MOUSE RNA binding protein fox-1 homolog 2 OS=Mus musculus OX=10090 GN=Rbfox2 PE=1 SV=2;tr|A0A2R8VI79|A0A2R8VI79_MOUSE RNA binding protein fox-1 homolog 1 OS=Mus musculus OX=10090 GN=Rbfox1 PE=1 SV=1;tr|A0A2I3BRA9|A0A2I3BRA9_MOUSE RNA-bindin	28	2	2	2	0	0	0	0	0	1	0	0	1	0	0	0	0	0	1	0	0	1	0	0	0	0	0	1	0	0	1	4	4	4	47.33	449	449;358;275;289;300;349;396;378;381;394;396;377;417;427;435;378;373;376;352;374;363;360;346;201;329;327;313;169	0.0013661	3.3521
A0A2R8VHK1	ENSMUSG00000022551	66445	A0A2R8VHK1;Q9D0M3-2;Q9D0M3	A0A2R8VHK1;Q9D0M3-2;Q9D0M3	1;1;1	1;1;1	1;1;1	Cytochrome c1, heme protein, mitochondrial	Cyc1	tr|A0A2R8VHK1|A0A2R8VHK1_MOUSE Cytochrome c1, heme protein, mitochondrial (Fragment) OS=Mus musculus OX=10090 GN=Cyc1 PE=1 SV=1;sp|Q9D0M3-2|CY1_MOUSE Isoform 2 of Cytochrome c1, heme protein, mitochondrial OS=Mus musculus OX=10090 GN=Cyc1;sp|Q9D0M3|CY1_MOU	3	1	1	1	0	1	0	0	0	0	0	0	0	0	1	0	0	0	0	0	0	0	0	1	0	0	0	0	0	0	0	7.3	7.3	7.3	17.861	165	165;266;325	0	4.6706
A0A2R8VK76	ENSMUSG00000034022	94230	A0A2R8VK76;Q9EPU4	A0A2R8VK76;Q9EPU4	1;1	1;1	1;1	Cleavage and polyadenylation specificity factor subunit 1	Cpsf1	tr|A0A2R8VK76|A0A2R8VK76_MOUSE Cleavage and polyadenylation-specificity factor subunit 1 OS=Mus musculus OX=10090 GN=Cpsf1 PE=1 SV=1;sp|Q9EPU4|CPSF1_MOUSE Cleavage and polyadenylation specificity factor subunit 1 OS=Mus musculus OX=10090 GN=Cpsf1 PE=1 SV=1	2	1	1	1	1	1	0	0	0	0	0	1	1	1	1	0	0	0	0	0	1	1	1	1	0	0	0	0	0	1	1	1.2	1.2	1.2	161.77	1450	1450;1441	0.002038	3.2673
A0A2R8W6Y5	ENSMUSG00000023025	207214	A0A2R8W6Y5;A0A2R8VKL5;E9Q066;G3X9Q6;Q8BWW4	A0A2R8W6Y5;A0A2R8VKL5;E9Q066;G3X9Q6;Q8BWW4	2;2;2;2;2	2;2;2;2;2	2;2;2;2;2	La-related protein 4	Larp4	tr|A0A2R8W6Y5|A0A2R8W6Y5_MOUSE La-related protein 4 OS=Mus musculus OX=10090 GN=Larp4 PE=1 SV=1;tr|A0A2R8VKL5|A0A2R8VKL5_MOUSE La-related protein 4 OS=Mus musculus OX=10090 GN=Larp4 PE=1 SV=1;tr|E9Q066|E9Q066_MOUSE La-related protein 4 OS=Mus musculus OX=1	5	2	2	2	0	0	0	2	0	0	0	0	0	0	0	0	2	0	0	0	0	0	0	0	0	2	0	0	0	0	0	5.2	5.2	5.2	67.487	610	610;660;718;719;719	0.001385	3.5559
A0A2R8W6J9	ENSMUSG00000026839	76654	A0A2R8W6J9;Q8R093;Q8CGR7	A0A2R8W6J9;Q8R093;Q8CGR7	1;1;1	1;1;1	1;1;1	Uridine phosphorylase;Uridine phosphorylase 2	Upp2	tr|A0A2R8W6J9|A0A2R8W6J9_MOUSE Uridine phosphorylase OS=Mus musculus OX=10090 GN=Upp2 PE=1 SV=1;tr|Q8R093|Q8R093_MOUSE Uridine phosphorylase OS=Mus musculus OX=10090 GN=Upp2 PE=1 SV=1;sp|Q8CGR7|UPP2_MOUSE Uridine phosphorylase 2 OS=Mus musculus OX=10090 GN	3	1	1	1	1	1	1	1	1	1	1	1	1	1	1	1	1	1	1	1	1	1	1	1	1	1	1	1	1	1	1	4.2	4.2	4.2	34.106	306	306;338;320	0.0013947	3.6145
A0A2R8W6R3	ENSMUSG00000022400	56438	A0A2R8W6R3;P62878	A0A2R8W6R3;P62878	1;1	1;1	1;1	E3 ubiquitin-protein ligase RBX1;E3 ubiquitin-protein ligase RBX1, N-terminally processed	Rbx1	tr|A0A2R8W6R3|A0A2R8W6R3_MOUSE E3 ubiquitin-protein ligase RBX1 OS=Mus musculus OX=10090 GN=Rbx1 PE=1 SV=1;sp|P62878|RBX1_MOUSE E3 ubiquitin-protein ligase RBX1 OS=Mus musculus OX=10090 GN=Rbx1 PE=1 SV=1	2	1	1	1	1	1	1	1	0	0	0	1	1	1	1	1	1	0	0	0	1	1	1	1	1	1	0	0	0	1	1	21.7	21.7	21.7	9.1173	83	83;108	0.0069313	2.6266
Q3TE85	ENSMUSG00000046711	15361	Q3TE85;A0A338P6F6;P17095;A0A338P6E8	Q3TE85;A0A338P6F6;P17095	3;3;3;1	3;3;3;1	2;2;2;0	High mobility group protein HMG-I/HMG-Y	Hmga1	tr|Q3TE85|Q3TE85_MOUSE High mobility group protein HMG-I/HMG-Y OS=Mus musculus OX=10090 GN=Hmga1 PE=1 SV=1;tr|A0A338P6F6|A0A338P6F6_MOUSE High mobility group protein HMG-I/HMG-Y OS=Mus musculus OX=10090 GN=Hmga1 PE=1 SV=1;sp|P17095|HMGA1_MOUSE High mobilit	4	3	3	2	0	1	0	2	0	2	1	1	3	0	1	0	2	0	2	1	1	3	0	0	0	2	0	1	1	1	2	23.6	23.6	15.1	11.485	106	106;118;107;111	0	5.4257
A0A338P6I2	ENSMUSG00000021018	245841	A0A338P6I2;Q923G2;A0A338P6B4;A0A338P6M3	A0A338P6I2;Q923G2;A0A338P6B4	3;3;2;1	3;3;2;1	3;3;2;1	DNA-directed RNA polymerases I, II, and III subunit RPABC3	Polr2h	tr|A0A338P6I2|A0A338P6I2_MOUSE DNA-directed RNA polymerases I, II, and III subunit RPABC3 OS=Mus musculus OX=10090 GN=Polr2h PE=1 SV=1;sp|Q923G2|RPAB3_MOUSE DNA-directed RNA polymerases I, II, and III subunit RPABC3 OS=Mus musculus OX=10090 GN=Polr2h PE=1	4	3	3	3	3	2	2	2	2	0	2	3	1	3	2	2	2	2	0	2	3	1	3	2	2	2	2	0	2	3	1	26.6	26.6	26.6	16.493	143	143;150;108;91	0	12.017
A0A338P755	ENSMUSG00000072214	18951	A0A338P755;A0A338P729;A0A338P6R8;A0A338P769;B7ZNM7;Q9Z2Q6	A0A338P755;A0A338P729;A0A338P6R8;A0A338P769;B7ZNM7;Q9Z2Q6	1;1;1;1;1;1	1;1;1;1;1;1	1;1;1;1;1;1	Septin-5	Septin5	tr|A0A338P755|A0A338P755_MOUSE Septin-5 (Fragment) OS=Mus musculus OX=10090 GN=Septin5 PE=4 SV=1;tr|A0A338P729|A0A338P729_MOUSE Septin-5 OS=Mus musculus OX=10090 GN=Septin5 PE=1 SV=1;tr|A0A338P6R8|A0A338P6R8_MOUSE Septin OS=Mus musculus OX=10090 GN=Gm49601	6	1	1	1	0	1	0	0	0	0	0	0	0	0	1	0	0	0	0	0	0	0	0	1	0	0	0	0	0	0	0	6.3	6.3	6.3	14.301	126	126;248;365;378;381;369	0.0097324	2.3974
A0A338P7D4	ENSMUSG00000091631	328759	A0A338P7D4;A0A338P6T0;L7N1Z9;E9PZ56;K7N6Z2;E9PZJ7	A0A338P7D4;A0A338P6T0;L7N1Z9;E9PZ56;K7N6Z2;E9PZJ7	1;1;1;1;1;1	1;1;1;1;1;1	1;1;1;1;1;1	vomeronasal 2, receptor 95	Vmn2r93;Vmn2r98;Vmn2r97;Vmn2r107	tr|A0A338P7D4|A0A338P7D4_MOUSE Vomeronasal 2, receptor 95 OS=Mus musculus OX=10090 GN=Vmn2r95 PE=4 SV=1;tr|A0A338P6T0|A0A338P6T0_MOUSE Vomeronasal 2, receptor 95 OS=Mus musculus OX=10090 GN=Vmn2r95 PE=4 SV=1;tr|L7N1Z9|L7N1Z9_MOUSE Vomeronasal 2, receptor 9	6	1	1	1	0	0	0	0	0	1	0	0	0	0	0	0	0	0	1	0	0	0	0	0	0	0	0	1	0	0	0	1.2	1.2	1.2	88.771	773	773;845;857;857;861;861	1	-2
A0A338P6W8	ENSMUSG00000055945	320111	A0A338P6W8;Q6PAN7	A0A338P6W8;Q6PAN7	1;1	1;1	1;1	Proline-rich protein 18	Prr18	tr|A0A338P6W8|A0A338P6W8_MOUSE Proline-rich protein 18 (Fragment) OS=Mus musculus OX=10090 GN=Prr18 PE=1 SV=1;sp|Q6PAN7|PRR18_MOUSE Proline-rich protein 18 OS=Mus musculus OX=10090 GN=Prr18 PE=1 SV=2	2	1	1	1	0	0	0	0	1	0	0	1	0	0	0	0	0	1	0	0	1	0	0	0	0	0	1	0	0	1	0	6	6	6	11.941	117	117;307	1	-2
A0A338P7E5	ENSMUSG00000038965	22195	A0A338P7E5;A0A338P786;P68037;A0A338P702	A0A338P7E5;A0A338P786;P68037;A0A338P702	2;2;2;1	2;2;2;1	2;2;2;1	Ubiquitin-conjugating enzyme E2 L3	Ube2l3	tr|A0A338P7E5|A0A338P7E5_MOUSE Ubiquitin-conjugating enzyme E2 L3 OS=Mus musculus OX=10090 GN=Ube2l3 PE=1 SV=1;tr|A0A338P786|A0A338P786_MOUSE Ubiquitin-conjugating enzyme E2 L3 (Fragment) OS=Mus musculus OX=10090 GN=Ube2l3 PE=1 SV=1;sp|P68037|UB2L3_MOUSE U	4	2	2	2	0	2	0	0	0	0	0	0	1	0	2	0	0	0	0	0	0	1	0	2	0	0	0	0	0	0	1	29.5	29.5	29.5	14.121	122	122;146;154;114	0	6.7839
A0A338P7C0	ENSMUSG00000014769	19170	A0A338P7C0;A0A338P7F1;O09061	A0A338P7C0;A0A338P7F1;O09061	1;1;1	1;1;1	1;1;1	Proteasome subunit beta type-1	Psmb1	tr|A0A338P7C0|A0A338P7C0_MOUSE Proteasome subunit beta type-1 OS=Mus musculus OX=10090 GN=Psmb1 PE=1 SV=1;tr|A0A338P7F1|A0A338P7F1_MOUSE Proteasome subunit beta OS=Mus musculus OX=10090 GN=Psmb1 PE=1 SV=1;sp|O09061|PSB1_MOUSE Proteasome subunit beta type-1	3	1	1	1	0	1	0	0	0	0	0	0	0	0	1	0	0	0	0	0	0	0	0	1	0	0	0	0	0	0	0	10	10	10	15.637	140	140;203;240	0.008658	2.5026
S4R1K6	ENSMUSG00000006958	12667	S4R1K6;A0A338P7C1;A2CG33;A6H5Z6;Q9Z0E2	S4R1K6;A0A338P7C1;A2CG33;A6H5Z6;Q9Z0E2	1;1;1;1;1	1;1;1;1;1	1;1;1;1;1	Chordin	Chrd	tr|S4R1K6|S4R1K6_MOUSE Chordin OS=Mus musculus OX=10090 GN=Chrd PE=4 SV=1;tr|A0A338P7C1|A0A338P7C1_MOUSE Chordin OS=Mus musculus OX=10090 GN=Chrd PE=4 SV=1;tr|A2CG33|A2CG33_MOUSE Chordin OS=Mus musculus OX=10090 GN=Chrd PE=1 SV=1;tr|A6H5Z6|A6H5Z6_MOUSE Cho	5	1	1	1	0	0	0	0	0	0	0	1	0	0	0	0	0	0	0	0	1	0	0	0	0	0	0	0	0	1	0	4.5	4.5	4.5	26.283	242	242;349;605;970;948	1	-2
A0A338P7L9	ENSMUSG00000022774	68092	A0A338P7L9;Q9CQ49	A0A338P7L9;Q9CQ49	2;2	2;2	2;2	Nuclear cap-binding protein subunit 2	Ncbp2	tr|A0A338P7L9|A0A338P7L9_MOUSE Nuclear cap-binding protein subunit 2 OS=Mus musculus OX=10090 GN=Ncbp2 PE=1 SV=1;sp|Q9CQ49|NCBP2_MOUSE Nuclear cap-binding protein subunit 2 OS=Mus musculus OX=10090 GN=Ncbp2 PE=1 SV=1	2	2	2	2	0	0	0	0	1	1	0	0	0	0	0	0	0	1	1	0	0	0	0	0	0	0	1	1	0	0	0	11.5	11.5	11.5	19.109	165	165;156	0.0013812	3.4756
A0A3B2W3M7	ENSMUSG00000040681	15312	A0A3B2W3M7;P18608	A0A3B2W3M7;P18608	1;1	1;1	1;1	Non-histone chromosomal protein HMG-14	Hmgn1	tr|A0A3B2W3M7|A0A3B2W3M7_MOUSE Non-histone chromosomal protein HMG-14 OS=Mus musculus OX=10090 GN=Hmgn1 PE=1 SV=1;sp|P18608|HMGN1_MOUSE Non-histone chromosomal protein HMG-14 OS=Mus musculus OX=10090 GN=Hmgn1 PE=1 SV=2	2	1	1	1	0	0	0	1	0	0	0	0	1	0	0	0	1	0	0	0	0	1	0	0	0	1	0	0	0	0	1	34.9	34.9	34.9	9.029	86	86;96	0	25.7
A0A3B2W7K0	ENSMUSG00000003200	20405	A0A3B2W7K0;Q62419	A0A3B2W7K0;Q62419	1;1	1;1	1;1	Endophilin-A2	Sh3gl1	tr|A0A3B2W7K0|A0A3B2W7K0_MOUSE Endophilin-A2 OS=Mus musculus OX=10090 GN=Sh3gl1 PE=1 SV=1;sp|Q62419|SH3G1_MOUSE Endophilin-A2 OS=Mus musculus OX=10090 GN=Sh3gl1 PE=1 SV=1	2	1	1	1	0	1	0	0	0	0	0	0	0	0	1	0	0	0	0	0	0	0	0	1	0	0	0	0	0	0	0	4.9	4.9	4.9	27.866	247	247;368	0.0044929	2.784
A0A3B2WB82	ENSMUSG00000022913	56088	A0A3B2WB82;Q9JK23	A0A3B2WB82;Q9JK23	1;1	1;1	1;1	Proteasome assembly chaperone 1	Psmg1	tr|A0A3B2WB82|A0A3B2WB82_MOUSE Proteasome assembly chaperone 1 OS=Mus musculus OX=10090 GN=Psmg1 PE=1 SV=1;sp|Q9JK23|PSMG1_MOUSE Proteasome assembly chaperone 1 OS=Mus musculus OX=10090 GN=Psmg1 PE=1 SV=1	2	1	1	1	1	0	0	1	0	0	0	1	1	1	0	0	1	0	0	0	1	1	1	0	0	1	0	0	0	1	1	5.2	5.2	5.2	30.54	268	268;289	0	4.7012
A0A3B2WBL1	ENSMUSG00000037805	19896	A0A3B2WBL1;Q5XJF6;A0A3B2WDD2;A0A3B2W824;A0A3B2W820;A0A3B2WCA5;D6RE43	A0A3B2WBL1;Q5XJF6;A0A3B2WDD2;A0A3B2W824	12;12;11;8;5;2;2	12;12;11;8;5;2;2	1;1;1;1;1;0;0	Ribosomal protein	Rpl10a	tr|A0A3B2WBL1|A0A3B2WBL1_MOUSE Ribosomal protein OS=Mus musculus OX=10090 GN=Rpl10a PE=1 SV=1;tr|Q5XJF6|Q5XJF6_MOUSE Ribosomal protein OS=Mus musculus OX=10090 GN=Rpl10a PE=1 SV=1;tr|A0A3B2WDD2|A0A3B2WDD2_MOUSE Ribosomal protein OS=Mus musculus OX=10090 GN	7	12	12	1	8	10	10	11	11	8	11	10	10	8	10	10	11	11	8	11	10	10	1	1	1	1	1	1	1	1	1	48.6	48.6	7.4	24.744	216	216;217;190;164;118;54;58	0	323.31
Q3U0V1	ENSMUSG00000007670	16549	Q3U0V1;A0A3B2WCD8;A0A3B2W465	Q3U0V1;A0A3B2WCD8	8;8;2	8;8;2	8;8;2	Far upstream element-binding protein 2	Khsrp	sp|Q3U0V1|FUBP2_MOUSE Far upstream element-binding protein 2 OS=Mus musculus OX=10090 GN=Khsrp PE=1 SV=2;tr|A0A3B2WCD8|A0A3B2WCD8_MOUSE Far upstream element-binding protein 2 OS=Mus musculus OX=10090 GN=Khsrp PE=1 SV=1	3	8	8	8	3	5	4	4	1	2	3	2	4	3	5	4	4	1	2	3	2	4	3	5	4	4	1	2	3	2	4	14.8	14.8	14.8	76.775	748	748;721;238	0	20.703
A0A3Q4EBV4	ENSMUSG00000002017	72722	A0A3Q4EBV4;Q3TJZ6	A0A3Q4EBV4;Q3TJZ6	5;5	4;4	4;4	Protein FAM98A	Fam98a	tr|A0A3Q4EBV4|A0A3Q4EBV4_MOUSE Protein FAM98A OS=Mus musculus OX=10090 GN=Fam98a PE=1 SV=1;sp|Q3TJZ6|FA98A_MOUSE Protein FAM98A OS=Mus musculus OX=10090 GN=Fam98a PE=1 SV=1	2	5	4	4	4	2	4	4	3	4	4	1	4	4	2	4	4	2	3	4	1	4	4	2	4	4	2	3	4	1	4	24.7	20.5	20.5	33.951	308	308;515	0	34.791
A0A3Q4EI12	ENSMUSG00000073639	19330	A0A3Q4EI12;P35293	A0A3Q4EI12;P35293	2;2	2;2	2;2	Ras-related protein Rab-18	Rab18	tr|A0A3Q4EI12|A0A3Q4EI12_MOUSE Ras-related protein Rab-18 OS=Mus musculus OX=10090 GN=Rab18 PE=1 SV=1;sp|P35293|RAB18_MOUSE Ras-related protein Rab-18 OS=Mus musculus OX=10090 GN=Rab18 PE=1 SV=2	2	2	2	2	0	2	0	0	0	0	0	0	0	0	2	0	0	0	0	0	0	0	0	2	0	0	0	0	0	0	0	14.2	14.2	14.2	23.787	212	212;206	0	18.485
A0A3Q4L393	ENSMUSG00000024097	225027	A0A3Q4L393;Q8BL97-4;Q8BL97-2;Q8BL97;A0A3Q4EH04;A0A3Q4L335;Q8BL97-3;A0A3Q4EGP0	A0A3Q4L393;Q8BL97-4;Q8BL97-2;Q8BL97;A0A3Q4EH04;A0A3Q4L335;Q8BL97-3	6;6;6;6;5;5;5;2	6;6;6;6;5;5;5;2	5;5;5;5;4;4;4;2	Serine/arginine-rich splicing factor 7	Srsf7	tr|A0A3Q4L393|A0A3Q4L393_MOUSE Serine/arginine-rich-splicing factor 7 OS=Mus musculus OX=10090 GN=Srsf7 PE=1 SV=1;sp|Q8BL97-4|SRSF7_MOUSE Isoform 4 of Serine/arginine-rich splicing factor 7 OS=Mus musculus OX=10090 GN=Srsf7;sp|Q8BL97-2|SRSF7_MOUSE Isoform	8	6	6	5	4	5	4	3	5	4	4	5	5	4	5	4	3	5	4	4	5	5	3	4	3	2	4	3	3	4	4	25.5	25.5	19.6	26.939	235	235;226;238;267;137;215;157;154	0	22.63
A0A452J888	ENSMUSG00000002475	106861	A0A452J888;Q91ZH7-2;Q91ZH7	A0A452J888;Q91ZH7-2;Q91ZH7	1;1;1	1;1;1	1;1;1	Phospholipase ABHD3	Abhd3	tr|A0A452J888|A0A452J888_MOUSE Phospholipase ABHD3 OS=Mus musculus OX=10090 GN=Abhd3 PE=1 SV=1;sp|Q91ZH7-2|ABHD3_MOUSE Isoform 2 of Phospholipase ABHD3 OS=Mus musculus OX=10090 GN=Abhd3;sp|Q91ZH7|ABHD3_MOUSE Phospholipase ABHD3 OS=Mus musculus OX=10090 GN=	3	1	1	1	0	0	0	0	0	0	0	1	0	0	0	0	0	0	0	0	1	0	0	0	0	0	0	0	0	1	0	2.5	2.5	2.5	40.326	360	360;407;411	1	-2
A0A494B8Y2	ENSMUSG00000025209	226153	A0A494B8Y2;Q8CIW5-2;Q8CIW5	A0A494B8Y2;Q8CIW5-2;Q8CIW5	2;2;2	2;2;2	2;2;2	Twinkle protein, mitochondrial	Peo1	tr|A0A494B8Y2|A0A494B8Y2_MOUSE Twinkle protein, mitochondrial OS=Mus musculus OX=10090 GN=Twnk PE=1 SV=1;sp|Q8CIW5-2|PEO1_MOUSE Isoform 2 of Twinkle protein, mitochondrial OS=Mus musculus OX=10090 GN=Twnk;sp|Q8CIW5|PEO1_MOUSE Twinkle protein, mitochondrial	3	2	2	2	0	0	0	2	1	1	0	0	0	0	0	0	2	1	1	0	0	0	0	0	0	2	1	1	0	0	0	11.3	11.3	11.3	25.812	230	230;287;685	0	4.4826
A0A494B908	ENSMUSG00000060803	14870	A0A494B908;A0A494BAW2;P19157;A0A494BAS3;A0A494BAU3;Q8VC73;F6RWR5;P46425	A0A494B908;A0A494BAW2;P19157;A0A494BAS3;A0A494BAU3;Q8VC73;F6RWR5;P46425	2;2;2;1;1;1;1;1	2;2;2;1;1;1;1;1	2;2;2;1;1;1;1;1	Glutathione S-transferase P 1;Glutathione S-transferase P 2	Gstp1;BC021614;Gstp2	tr|A0A494B908|A0A494B908_MOUSE GST class-pi (Fragment) OS=Mus musculus OX=10090 GN=Gstp1 PE=1 SV=1;tr|A0A494BAW2|A0A494BAW2_MOUSE GST class-pi OS=Mus musculus OX=10090 GN=Gstp1 PE=1 SV=1;sp|P19157|GSTP1_MOUSE Glutathione S-transferase P 1 OS=Mus musculus O	8	2	2	2	2	1	2	0	0	0	2	2	2	2	1	2	0	0	0	2	2	2	2	1	2	0	0	0	2	2	2	15	15	15	18.038	160	160;193;210;84;95;210;210;210	0	9.0375
A0A494B9D7	ENSMUSG00000024764	70999	A0A494B9D7;Q8VE10-2;Q8VE10;Q8VE10-3	A0A494B9D7;Q8VE10-2;Q8VE10	3;3;3;1	3;3;3;1	3;3;3;1	N-alpha-acetyltransferase 40	Naa40	tr|A0A494B9D7|A0A494B9D7_MOUSE N-alpha-acetyltransferase 40 OS=Mus musculus OX=10090 GN=Naa40 PE=1 SV=1;sp|Q8VE10-2|NAA40_MOUSE Isoform 2 of N-alpha-acetyltransferase 40 OS=Mus musculus OX=10090 GN=Naa40;sp|Q8VE10|NAA40_MOUSE N-alpha-acetyltransferase 40 O	4	3	3	3	1	1	1	2	0	1	2	0	2	1	1	1	2	0	1	2	0	2	1	1	1	2	0	1	2	0	2	19.4	19.4	19.4	22.321	191	191;210;237;120	0	13.949
A0A494B9G1	ENSMUSG00000007338	18120	A0A494B9G1	A0A494B9G1	3	1	1	mitochondrial ribosomal protein L49	Mrpl49	tr|A0A494B9G1|A0A494B9G1_MOUSE 39S ribosomal protein L49, mitochondrial (Fragment) OS=Mus musculus OX=10090 GN=Mrpl49 PE=1 SV=1	1	3	1	1	3	1	2	0	0	0	0	0	0	1	0	1	0	0	0	0	0	0	1	0	1	0	0	0	0	0	0	37.4	20.9	20.9	13.149	115	115	0	9.4475
A0A494B9L0	ENSMUSG00000002625	54194	A0A494B9L0;Q5RL57;Q9R0L7;A0A494BBL1;A0A494B9R0;A0A494BAE8	A0A494B9L0;Q5RL57;Q9R0L7;A0A494BBL1	5;5;5;4;1;1	5;5;5;4;1;1	5;5;5;4;1;1	A-kinase anchor protein 8-like	Akap8l	tr|A0A494B9L0|A0A494B9L0_MOUSE A-kinase anchor protein 8-like OS=Mus musculus OX=10090 GN=Akap8l PE=1 SV=1;tr|Q5RL57|Q5RL57_MOUSE A kinase (PRKA) anchor protein 8-like OS=Mus musculus OX=10090 GN=Akap8l PE=1 SV=1;sp|Q9R0L7|AKP8L_MOUSE A-kinase anchor prote	6	5	5	5	5	3	2	1	2	2	1	1	1	5	3	2	1	2	2	1	1	1	5	3	2	1	2	2	1	1	1	10.2	10.2	10.2	67.884	607	607;641;642;262;83;148	0	18.073
A0A494B9W4	ENSMUSG00000033760	66704	A0A494B9W4;Q8VE92	A0A494B9W4;Q8VE92	9;9	1;1	1;1	RNA-binding protein 4B	Rbm4b	tr|A0A494B9W4|A0A494B9W4_MOUSE RNA-binding protein 4B (Fragment) OS=Mus musculus OX=10090 GN=Rbm4b PE=1 SV=1;sp|Q8VE92|RBM4B_MOUSE RNA-binding protein 4B OS=Mus musculus OX=10090 GN=Rbm4b PE=1 SV=1	2	9	1	1	3	2	5	1	3	4	5	6	5	1	1	1	1	1	1	1	1	1	1	1	1	1	1	1	1	1	1	36.8	5.6	5.6	32.069	285	285;357	0	5.0813
A0A494B9Z0	ENSMUSG00000038274	14109	A0A494B9Z0;A0A494BBA8;Q642K5;P62862	A0A494B9Z0;A0A494BBA8;Q642K5;P62862	2;2;2;2	2;2;2;2	2;2;2;2	40S ribosomal protein S30	Fau	tr|A0A494B9Z0|A0A494B9Z0_MOUSE 40S ribosomal protein S30 OS=Mus musculus OX=10090 GN=Fau PE=1 SV=1;tr|A0A494BBA8|A0A494BBA8_MOUSE 40S ribosomal protein S30 OS=Mus musculus OX=10090 GN=Fau PE=1 SV=1;tr|Q642K5|Q642K5_MOUSE 40S ribosomal protein S30 OS=Mus mu	4	2	2	2	2	2	2	2	2	2	2	2	2	2	2	2	2	2	2	2	2	2	2	2	2	2	2	2	2	2	2	17.5	17.5	17.5	7.0062	63	63;98;133;59	0	16.683
B0V2V6	ENSMUSG00000024002	57261	B0V2V6;A0A494BAK1;Q3UH70;Q9ESU6-2;Q8K2F0;Q9ESU6	B0V2V6;A0A494BAK1;Q3UH70;Q9ESU6-2;Q8K2F0;Q9ESU6	1;1;1;1;1;1	1;1;1;1;1;1	1;1;1;1;1;1	Bromodomain-containing protein 4;Bromodomain-containing protein 3	Brd4;Brd3	tr|B0V2V6|B0V2V6_MOUSE Bromodomain-containing protein 4 (Fragment) OS=Mus musculus OX=10090 GN=Brd4 PE=1 SV=1;tr|A0A494BAK1|A0A494BAK1_MOUSE Bromodomain-containing protein 4 (Fragment) OS=Mus musculus OX=10090 GN=Brd4 PE=1 SV=1;tr|Q3UH70|Q3UH70_MOUSE Bromo	6	1	1	1	1	1	1	1	0	0	1	1	1	1	1	1	1	0	0	1	1	1	1	1	1	1	0	0	1	1	1	1.6	1.6	1.6	62.021	557	557;572;1401;723;726;1400	0.0087011	2.5221
A0A494BB86	ENSMUSG00000025228	54130	A0A494BB86;P61164	A0A494BB86;P61164	2;2	2;2	2;2	Alpha-centractin	Actr1a	tr|A0A494BB86|A0A494BB86_MOUSE Alpha-centractin OS=Mus musculus OX=10090 GN=Actr1a PE=1 SV=1;sp|P61164|ACTZ_MOUSE Alpha-centractin OS=Mus musculus OX=10090 GN=Actr1a PE=1 SV=1	2	2	2	2	0	2	0	0	0	0	0	0	0	0	2	0	0	0	0	0	0	0	0	2	0	0	0	0	0	0	0	11.7	11.7	11.7	37.669	332	332;376	0	8.9773
A0A494BB89	ENSMUSG00000024587	70223	A0A494BB89;A0A498WGK2;Q8BP47;A0A494BAX5;A0A494BAW6;A0A494B927	A0A494BB89;A0A498WGK2;Q8BP47;A0A494BAX5	3;3;3;2;1;1	3;3;3;2;1;1	3;3;3;2;1;1	Asparagine--tRNA ligase, cytoplasmic	Nars	tr|A0A494BB89|A0A494BB89_MOUSE Asparaginyl-tRNA synthetase OS=Mus musculus OX=10090 GN=Nars PE=1 SV=1;tr|A0A498WGK2|A0A498WGK2_MOUSE Asparagine--tRNA ligase OS=Mus musculus OX=10090 GN=Nars PE=1 SV=1;sp|Q8BP47|SYNC_MOUSE Asparagine--tRNA ligase, cytoplasmi	6	3	3	3	0	1	0	0	0	0	0	2	0	0	1	0	0	0	0	0	2	0	0	1	0	0	0	0	0	2	0	7.2	7.2	7.2	59.214	517	517;558;559;497;164;210	0	16.577
A0A498WFS2	ENSMUSG00000071655	225896	A0A498WFS2;Q922Y1	A0A498WFS2;Q922Y1	2;2	2;2	2;2	UBX domain-containing protein 1	Ubxn1	tr|A0A498WFS2|A0A498WFS2_MOUSE UBX domain-containing protein 1 OS=Mus musculus OX=10090 GN=Ubxn1 PE=1 SV=1;sp|Q922Y1|UBXN1_MOUSE UBX domain-containing protein 1 OS=Mus musculus OX=10090 GN=Ubxn1 PE=1 SV=1	2	2	2	2	1	1	1	2	1	1	1	2	1	1	1	1	2	1	1	1	2	1	1	1	1	2	1	1	1	2	1	8	8	8	29.93	262	262;297	0	5.1263
A0A498WGD8	ENSMUSG00000024583	53382	A0A498WGD8;Q8CDN6;A0A494BBI1;A0A494B955;A0A494BB31	A0A498WGD8;Q8CDN6;A0A494BBI1;A0A494B955	7;7;6;6;3	7;7;6;6;3	7;7;6;6;3	Thioredoxin-like protein 1	Txnl1	tr|A0A498WGD8|A0A498WGD8_MOUSE Thioredoxin-like protein 1 OS=Mus musculus OX=10090 GN=Txnl1 PE=1 SV=1;sp|Q8CDN6|TXNL1_MOUSE Thioredoxin-like protein 1 OS=Mus musculus OX=10090 GN=Txnl1 PE=1 SV=3;tr|A0A494BBI1|A0A494BBI1_MOUSE Thioredoxin-like protein 1 OS=	5	7	7	7	3	6	4	5	3	4	4	4	4	3	6	4	5	3	4	4	4	4	3	6	4	5	3	4	4	4	4	39	39	39	32.715	292	292;289;243;259;91	0	32.869
G3UZD6	ENSMUSG00000028960	63958	G3UZD6;A0A571BD95;A0A5F8MP95;Q9ES00	G3UZD6;A0A571BD95;A0A5F8MP95;Q9ES00	2;2;2;2	2;2;2;2	2;2;2;2	Ubiquitin conjugation factor E4 B	Ube4b	tr|G3UZD6|G3UZD6_MOUSE Ubiquitin conjugation factor E4 B OS=Mus musculus OX=10090 GN=Ube4b PE=1 SV=1;tr|A0A571BD95|A0A571BD95_MOUSE Ubiquitin conjugation factor E4 B OS=Mus musculus OX=10090 GN=Ube4b PE=1 SV=1;tr|A0A5F8MP95|A0A5F8MP95_MOUSE Ubiquitin conju	4	2	2	2	0	0	0	0	0	0	0	2	1	0	0	0	0	0	0	0	2	1	0	0	0	0	0	0	0	2	1	3.2	3.2	3.2	113	998	998;1307;1353;1173	0.0014286	4.0163
A0A571BDL9	ENSMUSG00000000037	107815	A0A571BDL9	A0A571BDL9	13	2	2	Scm polycomb group protein like 2	Scml2	tr|A0A571BDL9|A0A571BDL9_MOUSE Scm polycomb group protein-like 2 (Fragment) OS=Mus musculus OX=10090 GN=Scml2 PE=1 SV=1	1	13	2	2	13	11	12	13	13	11	12	13	13	2	1	2	2	2	0	2	2	2	2	1	2	2	2	0	2	2	2	65.4	28.3	28.3	39.117	367	367	0	115.34
A0A571BEH9	ENSMUSG00000021662	110596	A0A571BEH9;G5E8P2;P97433	A0A571BEH9;G5E8P2;P97433	1;1;1	1;1;1	1;1;1	Rho guanine nucleotide exchange factor 28	Arhgef28	tr|A0A571BEH9|A0A571BEH9_MOUSE Rho guanine nucleotide exchange factor 28 OS=Mus musculus OX=10090 GN=Arhgef28 PE=1 SV=1;tr|G5E8P2|G5E8P2_MOUSE Rho guanine nucleotide exchange factor 28 OS=Mus musculus OX=10090 GN=Arhgef28 PE=1 SV=1;sp|P97433|ARG28_MOUSE Rh	3	1	1	1	1	0	1	0	1	0	1	0	0	1	0	1	0	1	0	1	0	0	1	0	1	0	1	0	1	0	0	0.5	0.5	0.5	156.05	1387	1387;1700;1693	0.0086957	2.5219
D3Z724	ENSMUSG00000009047	546672	D3Z724;O88375;Q9D6T8;Q9D746;A0A571BEP9	D3Z724;O88375;Q9D6T8;Q9D746;A0A571BEP9	2;2;2;2;2	2;2;2;2;2	2;2;2;2;2	predicted gene 5965	Gm5965;Krtap13;2310057N15Rik;2310034C09Rik	tr|D3Z724|D3Z724_MOUSE Predicted gene 5965 OS=Mus musculus OX=10090 GN=Gm5965 PE=4 SV=1;tr|O88375|O88375_MOUSE Keratin-associated protein 13 OS=Mus musculus OX=10090 GN=Krtap13 PE=2 SV=1;tr|Q9D6T8|Q9D6T8_MOUSE RIKEN cDNA 2310057N15 gene OS=Mus musculus OX=	5	2	2	2	0	1	1	1	0	0	0	0	0	0	1	1	1	0	0	0	0	0	0	1	1	1	0	0	0	0	0	20.4	20.4	20.4	21.117	196	196;197;200;214;216	0.0019907	3.0665
A0A571BF12	ENSMUSG00000025019	212391	A0A571BF12;F6RGI3;A0A571BE94;A0A494B9R4;Q6ZPI3	A0A571BF12;F6RGI3;A0A571BE94	13;12;12;1;1	13;12;12;1;1	13;12;12;1;1	ligand dependent nuclear receptor corepressor	Gm340	tr|A0A571BF12|A0A571BF12_MOUSE Ligand-dependent corepressor OS=Mus musculus OX=10090 GN=Lcor PE=1 SV=1;tr|F6RGI3|F6RGI3_MOUSE Ligand-dependent corepressor OS=Mus musculus OX=10090 GN=Lcor PE=1 SV=1;tr|A0A571BE94|A0A571BE94_MOUSE Ligand-dependent corepresso	5	13	13	13	4	2	5	10	8	4	6	8	9	4	2	5	10	8	4	6	8	9	4	2	5	10	8	4	6	8	9	9.7	9.7	9.7	183.3	1696	1696;1242;1563;396;433	0	36.698
A0A571BGF1	ENSMUSG00000095909	628709	A0A571BGF1;L7N208;A2ANU6;F6R9A8;Q99LG7;F6ZS36;L7N267;E9PZP6;A2AU83;P08043;A0A571BE92;F7D043;F6T2D2;A0A571BEN2;A2ART2;Q08BU3	A0A571BGF1;L7N208	5;5;2;2;2;2;2;2;2;2;1;1;1;1;1;1	3;3;1;1;1;1;1;1;1;1;1;1;1;1;1;1	2;2;0;0;0;0;0;0;0;0;1;0;0;0;0;0	zinc finger protein 997	Gm10324	tr|A0A571BGF1|A0A571BGF1_MOUSE Zinc finger protein 997 (Fragment) OS=Mus musculus OX=10090 GN=Zfp997 PE=4 SV=1;tr|L7N208|L7N208_MOUSE Zinc finger protein 997 OS=Mus musculus OX=10090 GN=Zfp997 PE=4 SV=1	16	5	3	2	2	2	3	4	4	2	3	4	4	0	0	1	2	2	1	1	2	2	0	0	1	2	2	0	1	2	2	42.3	9.3	5.6	55.999	482	482;604;463;466;467;494;546;546;715;459;64;238;329;409;485;522	0	9.5932
P26043	ENSMUSG00000032050	19684	P26043;A0A5F8MPB9;Q7TSG6	P26043;A0A5F8MPB9;Q7TSG6	5;5;4	1;1;1	1;1;1	Radixin	Rdx	sp|P26043|RADI_MOUSE Radixin OS=Mus musculus OX=10090 GN=Rdx PE=1 SV=3;tr|A0A5F8MPB9|A0A5F8MPB9_MOUSE Radixin OS=Mus musculus OX=10090 GN=Rdx PE=1 SV=1;tr|Q7TSG6|Q7TSG6_MOUSE Radixin OS=Mus musculus OX=10090 GN=Rdx PE=1 SV=1	3	5	1	1	0	5	0	0	0	0	0	0	0	0	1	0	0	0	0	0	0	0	0	1	0	0	0	0	0	0	0	7.2	1.4	1.4	68.542	583	583;604;389	0.0086795	2.5136
P14152	ENSMUSG00000020321	17449	P14152;A0A5F8MPN8;B1ATQ3	P14152;A0A5F8MPN8	4;4;1	4;4;1	4;4;1	Malate dehydrogenase, cytoplasmic	Mdh1	sp|P14152|MDHC_MOUSE Malate dehydrogenase, cytoplasmic OS=Mus musculus OX=10090 GN=Mdh1 PE=1 SV=3;tr|A0A5F8MPN8|A0A5F8MPN8_MOUSE Malate dehydrogenase OS=Mus musculus OX=10090 GN=Mdh1 PE=1 SV=1	3	4	4	4	0	4	0	0	0	0	0	0	0	0	4	0	0	0	0	0	0	0	0	4	0	0	0	0	0	0	0	17.1	17.1	17.1	36.511	334	334;355;155	0	14.917
A0A5F8MPS3	ENSMUSG00000079357	102633458	A0A5F8MPS3	A0A5F8MPS3	2	2	2	predicted gene 11100	Gm11100	tr|A0A5F8MPS3|A0A5F8MPS3_MOUSE Predicted gene 11100 OS=Mus musculus OX=10090 GN=Gm11100 PE=4 SV=1	1	2	2	2	0	1	0	0	0	0	1	0	2	0	1	0	0	0	0	1	0	2	0	1	0	0	0	0	1	0	2	5.8	5.8	5.8	33.102	295	295	0.0019789	3.0054
A0A5F8MPX1	ENSMUSG00000031540	244349	A0A5F8MPX1;G3X940;Q8BZ21	A0A5F8MPX1;G3X940;Q8BZ21	2;2;2	2;2;2	2;2;2	Histone acetyltransferase;Histone acetyltransferase KAT6A	Kat6a	tr|A0A5F8MPX1|A0A5F8MPX1_MOUSE Histone acetyltransferase OS=Mus musculus OX=10090 GN=Kat6a PE=1 SV=1;tr|G3X940|G3X940_MOUSE Histone acetyltransferase OS=Mus musculus OX=10090 GN=Kat6a PE=1 SV=1;sp|Q8BZ21|KAT6A_MOUSE Histone acetyltransferase KAT6A OS=Mus m	3	2	2	2	1	0	1	0	1	1	1	0	0	1	0	1	0	1	1	1	0	0	1	0	1	0	1	1	1	0	0	1.3	1.3	1.3	230.56	2053	2053;2003;2003	0	4.4363
A0A5F8MPX8	ENSMUSG00000030619	13626	A0A5F8MPX8;Q921E6;Q921E6-2;Q921E6-3;A0A140LIG5;A0A140LIN6	A0A5F8MPX8;Q921E6;Q921E6-2;Q921E6-3	16;15;15;14;7;4	16;15;15;14;7;4	16;15;15;14;7;4	Polycomb protein EED	Eed	tr|A0A5F8MPX8|A0A5F8MPX8_MOUSE Polycomb protein EED OS=Mus musculus OX=10090 GN=Eed PE=1 SV=2;sp|Q921E6|EED_MOUSE Polycomb protein EED OS=Mus musculus OX=10090 GN=Eed PE=1 SV=1;sp|Q921E6-2|EED_MOUSE Isoform 2 of Polycomb protein EED OS=Mus musculus OX=1009	6	16	16	16	9	4	8	9	8	4	9	6	12	9	4	8	9	8	4	9	6	12	9	4	8	9	8	4	9	6	12	39.4	39.4	39.4	56.164	500	500;441;500;427;220;118	0	40.893
A0A5F8MPZ7	ENSMUSG00000041718	67574	A0A5F8MPZ7;Q9D8C3	A0A5F8MPZ7;Q9D8C3	6;6	6;6	6;6	Putative bifunctional UDP-N-acetylglucosamine transferase and deubiquitinase ALG13	Alg13	tr|A0A5F8MPZ7|A0A5F8MPZ7_MOUSE Ubiquitinyl hydrolase 1 OS=Mus musculus OX=10090 GN=Alg13 PE=1 SV=1;sp|Q9D8C3|ALG13_MOUSE Putative bifunctional UDP-N-acetylglucosamine transferase and deubiquitinase ALG13 OS=Mus musculus OX=10090 GN=Alg13 PE=1 SV=2	2	6	6	6	4	1	2	3	1	2	2	2	3	4	1	2	3	1	2	2	2	3	4	1	2	3	1	2	2	2	3	8.4	8.4	8.4	107.05	969	969;1166	0	17.206
A0A668KL68	ENSMUSG00000044149	77286	A0A668KL68;Q8BY02	A0A668KL68;Q8BY02	24;22	24;22	24;22	NF-kappa-B-repressing factor	Nkrf	tr|A0A668KL68|A0A668KL68_MOUSE NF-kappa-B-repressing factor OS=Mus musculus OX=10090 GN=Nkrf PE=1 SV=1;sp|Q8BY02|NKRF_MOUSE NF-kappa-B-repressing factor OS=Mus musculus OX=10090 GN=Nkrf PE=2 SV=3	2	24	24	24	15	6	18	18	19	13	14	18	17	15	6	18	18	19	13	14	18	17	15	6	18	18	19	13	14	18	17	37.4	37.4	37.4	88.236	784	784;690	0	173.13
B1AU71	ENSMUSG00000027520	73884	B1AU71;A0A6I8MWW6;Q5SS00	B1AU71;A0A6I8MWW6;Q5SS00	1;1;1	1;1;1	1;1;1	DBF4-type zinc finger-containing protein 2 homolog	Zdbf2	tr|B1AU71|B1AU71_MOUSE DBF4-type zinc finger-containing protein 2 homolog (Fragment) OS=Mus musculus OX=10090 GN=Zdbf2 PE=1 SV=1;tr|A0A6I8MWW6|A0A6I8MWW6_MOUSE DBF4-type zinc finger-containing protein 2 homolog OS=Mus musculus OX=10090 GN=Zdbf2 PE=1 SV=1;s	3	1	1	1	1	1	1	1	1	1	1	1	1	1	1	1	1	1	1	1	1	1	1	1	1	1	1	1	1	1	1	14	14	14	6.0327	50	50;2498;2493	0.0020325	3.2496
A0A6I8MWZ1	ENSMUSG00000014195	56354	A0A6I8MWZ1;A2A5E1;A0A6I8MX00;A0A6I8MWX8;Q9QYI3;A0A6I8MWY7;A0A6I8MWZ9;F7BTP8;A0A6I8MWW0;A0A6I8MWZ5;A0A6I8MWW2;A0A6I8MX31	A0A6I8MWZ1;A2A5E1;A0A6I8MX00;A0A6I8MWX8;Q9QYI3;A0A6I8MWY7;A0A6I8MWZ9	5;5;5;5;5;4;3;2;1;1;1;1	5;5;5;5;5;4;3;2;1;1;1;1	5;5;5;5;5;4;3;2;1;1;1;1	DnaJ homolog subfamily C member 7	Dnajc7	tr|A0A6I8MWZ1|A0A6I8MWZ1_MOUSE DnaJ homolog subfamily C member 7 OS=Mus musculus OX=10090 GN=Dnajc7 PE=1 SV=1;tr|A2A5E1|A2A5E1_MOUSE DnaJ homolog subfamily C member 7 OS=Mus musculus OX=10090 GN=Dnajc7 PE=1 SV=2;tr|A0A6I8MX00|A0A6I8MX00_MOUSE DnaJ homolog	12	5	5	5	0	2	1	0	1	1	1	1	3	0	2	1	0	1	1	1	1	3	0	2	1	0	1	1	1	1	3	14.2	14.2	14.2	50.114	438	438;478;484;579;494;347;315;268;104;115;156;159	0	12.121
A0A7N9VRC4			A0A7N9VRC4;Q8R0W0	A0A7N9VRC4;Q8R0W0	7;7	5;5	5;5	Epiplakin	Eppk1	tr|A0A7N9VRC4|A0A7N9VRC4_MOUSE Uncharacterized protein OS=Mus musculus OX=10090 PE=4 SV=1;sp|Q8R0W0|EPIPL_MOUSE Epiplakin OS=Mus musculus OX=10090 GN=Eppk1 PE=1 SV=2	2	7	5	5	0	7	1	0	0	0	0	0	0	0	5	1	0	0	0	0	0	0	0	5	1	0	0	0	0	0	0	6.5	4.9	4.9	381.69	3458	3458;6548	0	37.218
A0A7N9VSG0			A0A7N9VSG0	A0A7N9VSG0	1	1	1	0	0	tr|A0A7N9VSG0|A0A7N9VSG0_MOUSE Spermatosis associated 5-like 1 OS=Mus musculus OX=10090 GN=Spata5l1 PE=4 SV=1	1	1	1	1	1	0	1	1	1	0	0	1	0	1	0	1	1	1	0	0	1	0	1	0	1	1	1	0	0	1	0	1.6	1.6	1.6	80.741	747	747	0.0051151	2.7375
A1L3S7	ENSMUSG00000042390	229542	A1L3S7;Q8VHR5;A0A0U1RNM2;Q8VHR5-2	A1L3S7;Q8VHR5;A0A0U1RNM2;Q8VHR5-2	8;8;4;4	8;8;4;4	8;8;4;4	Transcriptional repressor p66-beta	Gatad2b	tr|A1L3S7|A1L3S7_MOUSE Gatad2b protein OS=Mus musculus OX=10090 GN=Gatad2b PE=1 SV=1;sp|Q8VHR5|P66B_MOUSE Transcriptional repressor p66-beta OS=Mus musculus OX=10090 GN=Gatad2b PE=1 SV=1;tr|A0A0U1RNM2|A0A0U1RNM2_MOUSE Transcriptional repressor p66-beta (Fr	4	8	8	8	5	2	1	6	6	2	3	6	6	5	2	1	6	6	2	3	6	6	5	2	1	6	6	2	3	6	6	20.1	20.1	20.1	63.638	578	578;594;263;485	0	27.302
J3QJX0	ENSMUSG00000031095	72584	J3QJX0;E9PXY1;A2A432-2;A2A432	J3QJX0;E9PXY1;A2A432-2;A2A432	2;2;2;2	2;2;2;2	2;2;2;2	Cullin-4B	Cul4b	tr|J3QJX0|J3QJX0_MOUSE Cullin-4B OS=Mus musculus OX=10090 GN=Cul4b PE=1 SV=1;tr|E9PXY1|E9PXY1_MOUSE Cullin-4B OS=Mus musculus OX=10090 GN=Cul4b PE=1 SV=2;sp|A2A432-2|CUL4B_MOUSE Isoform 2 of Cullin-4B OS=Mus musculus OX=10090 GN=Cul4b;sp|A2A432|CUL4B_MOUSE	4	2	2	2	0	0	1	1	0	1	0	0	0	0	0	1	1	0	1	0	0	0	0	0	1	1	0	1	0	0	0	4.2	4.2	4.2	62.401	552	552;896;941;970	0.0013765	3.4113
P61290	ENSMUSG00000078652	19192	P61290;A2A4J1;A2A4J3	P61290;A2A4J1;A2A4J3	2;2;1	2;2;1	2;2;1	Proteasome activator complex subunit 3	Psme3	sp|P61290|PSME3_MOUSE Proteasome activator complex subunit 3 OS=Mus musculus OX=10090 GN=Psme3 PE=1 SV=1;tr|A2A4J1|A2A4J1_MOUSE Proteasome activator complex subunit 3 (Fragment) OS=Mus musculus OX=10090 GN=Psme3 PE=1 SV=1;tr|A2A4J3|A2A4J3_MOUSE Proteasome	3	2	2	2	2	2	0	1	0	0	0	0	0	2	2	0	1	0	0	0	0	0	2	2	0	1	0	0	0	0	0	10.2	10.2	10.2	29.506	254	254;203;154	0	25.258
A2A4P0	ENSMUSG00000034931	217207	A2A4P0;A2A4N9	A2A4P0;A2A4N9	3;2	2;1	2;1	ATP-dependent RNA helicase DHX8	Dhx8	sp|A2A4P0|DHX8_MOUSE ATP-dependent RNA helicase DHX8 OS=Mus musculus OX=10090 GN=Dhx8 PE=2 SV=1;tr|A2A4N9|A2A4N9_MOUSE RNA helicase (Fragment) OS=Mus musculus OX=10090 GN=Dhx8 PE=1 SV=8	2	3	2	2	1	1	1	3	1	1	2	1	1	0	0	0	2	0	0	1	0	0	0	0	0	2	0	0	1	0	0	3.3	2.6	2.6	142.57	1244	1244;1174	0.00072939	4.3454
A2A4U6	ENSMUSG00000017667	228876	A2A4U6	A2A4U6	1	1	1	zinc finger protein 334	Zfp334	tr|A2A4U6|A2A4U6_MOUSE Zinc finger protein 334 OS=Mus musculus OX=10090 GN=Zfp334 PE=1 SV=1	1	1	1	1	0	0	0	1	1	0	0	1	0	0	0	0	1	1	0	0	1	0	0	0	0	1	1	0	0	1	0	3.2	3.2	3.2	78.257	679	679	0	4.9482
A2A547	ENSMUSG00000017404	19921	A2A547;P84099	A2A547;P84099	5;5	5;5	5;5	Ribosomal protein L19;60S ribosomal protein L19	Rpl19	tr|A2A547|A2A547_MOUSE Ribosomal protein L19 OS=Mus musculus OX=10090 GN=Rpl19 PE=1 SV=1;sp|P84099|RL19_MOUSE 60S ribosomal protein L19 OS=Mus musculus OX=10090 GN=Rpl19 PE=1 SV=1	2	5	5	5	5	5	5	5	5	5	4	5	5	5	5	5	5	5	5	4	5	5	5	5	5	5	5	5	4	5	5	25.8	25.8	25.8	23.247	194	194;196	0	128.65
A2A590	ENSMUSG00000047253	69664	A2A590;A2A588;Q3V2D6;Q3V2C1	A2A590;A2A588;Q3V2D6;Q3V2C1	1;1;1;1	1;1;1;1	1;1;1;1	Keratin-associated protein 9-3	Krtap1-5;Krtap1-3;Krtap1-4;Krtap9-3	tr|A2A590|A2A590_MOUSE Keratin-associated protein 1-5 OS=Mus musculus OX=10090 GN=Krtap1-5 PE=2 SV=1;tr|A2A588|A2A588_MOUSE Keratin-associated protein 1-3 OS=Mus musculus OX=10090 GN=Krtap1-3 PE=4 SV=1;tr|Q3V2D6|Q3V2D6_MOUSE Keratin-associated protein 1-4	4	1	1	1	0	0	0	0	0	0	0	1	0	0	0	0	0	0	0	0	1	0	0	0	0	0	0	0	0	1	0	8.2	8.2	8.2	12.465	122	122;173;188;136	0.0013708	3.3688
A2A5F5	ENSMUSG00000019173	19345	A2A5F5;Q8C266;Q9CQD1;P61021;P35278;A2A5F6	A2A5F5;Q8C266;Q9CQD1;P61021;P35278;A2A5F6	2;2;2;2;2;1	2;2;2;2;2;1	2;2;2;2;2;1	Ras-related protein Rab-5A;Ras-related protein Rab-5B;Ras-related protein Rab-5C	Rab5c;Rab5a;Rab5b	tr|A2A5F5|A2A5F5_MOUSE Ras-related protein Rab-5C (Fragment) OS=Mus musculus OX=10090 GN=Rab5c PE=1 SV=1;tr|Q8C266|Q8C266_MOUSE Ras-related protein Rab-5C OS=Mus musculus OX=10090 GN=Rab5c PE=1 SV=1;sp|Q9CQD1|RAB5A_MOUSE Ras-related protein Rab-5A OS=Mus m	6	2	2	2	0	2	0	0	0	0	0	0	0	0	2	0	0	0	0	0	0	0	0	2	0	0	0	0	0	0	0	26.5	26.5	26.5	8.9521	83	83;234;215;215;216;34	0	6.1189
A2A5S3	ENSMUSG00000039536	20853	A2A5S3;V9GX87	A2A5S3;V9GX87	25;17	25;17	1;1	staufen double-stranded RNA binding protein 1	Stau1	tr|A2A5S3|A2A5S3_MOUSE Double-stranded RNA-binding protein Staufen homolog 1 OS=Mus musculus OX=10090 GN=Stau1 PE=1 SV=1;tr|V9GX87|V9GX87_MOUSE Double-stranded RNA-binding protein Staufen homolog 1 OS=Mus musculus OX=10090 GN=Stau1 PE=1 SV=1	2	25	25	1	17	21	19	20	18	18	17	19	18	17	21	19	20	18	18	17	19	18	0	0	0	0	0	1	0	0	0	56.4	56.4	3.2	54.855	495	495;436	0	261.59
A2A5X5	ENSMUSG00000078253	100504183	A2A5X5	A2A5X5	2	2	2	Keratin-associated protein 16-1	Krtap16-1	sp|A2A5X5|KR161_MOUSE Keratin-associated protein 16-1 OS=Mus musculus OX=10090 GN=Krtap16-1 PE=3 SV=1	1	2	2	2	0	0	0	1	0	0	0	1	0	0	0	0	1	0	0	0	1	0	0	0	0	1	0	0	0	1	0	9.4	9.4	9.4	52.02	502	502	0.0019815	3.0218
E9Q6A7	ENSMUSG00000040481	207165	E9Q6A7;A2A655;A2A654	E9Q6A7;A2A655;A2A654	2;2;2	2;2;2	2;2;2	bromodomain PHD finger transcription factor	Bptf	tr|E9Q6A7|E9Q6A7_MOUSE Bromodomain PHD finger transcription factor OS=Mus musculus OX=10090 GN=Bptf PE=1 SV=1;tr|A2A655|A2A655_MOUSE Bromodomain PHD finger transcription factor OS=Mus musculus OX=10090 GN=Bptf PE=1 SV=1;tr|A2A654|A2A654_MOUSE Bromodomain P	3	2	2	2	0	0	0	0	0	0	1	0	2	0	0	0	0	0	0	1	0	2	0	0	0	0	0	0	1	0	2	1	1	1	321.59	2921	2921;2973;3036	0.0050988	2.7003
A2A6A1	ENSMUSG00000034621	237943	A2A6A1	A2A6A1	1	1	1	G patch domain-containing protein 8	Gpatch8	sp|A2A6A1|GPTC8_MOUSE G patch domain-containing protein 8 OS=Mus musculus OX=10090 GN=Gpatch8 PE=1 SV=1	1	1	1	1	1	0	0	0	0	0	0	0	0	1	0	0	0	0	0	0	0	0	1	0	0	0	0	0	0	0	0	0.9	0.9	0.9	164.99	1505	1505	0.0013689	3.3658
A2A6T4	ENSMUSG00000018858	68572	A2A6T4;Q8R035;Q8R035-2;D6RHR8	A2A6T4;Q8R035;Q8R035-2	5;5;4;1	5;5;4;1	5;5;4;1	Peptidyl-tRNA hydrolase ICT1, mitochondrial	Ict1	tr|A2A6T4|A2A6T4_MOUSE Peptidyl-tRNA hydrolase ICT1, mitochondrial OS=Mus musculus OX=10090 GN=Mrpl58 PE=1 SV=1;sp|Q8R035|ICT1_MOUSE Peptidyl-tRNA hydrolase ICT1, mitochondrial OS=Mus musculus OX=10090 GN=Mrpl58 PE=1 SV=1;sp|Q8R035-2|ICT1_MOUSE Isoform 2 o	4	5	5	5	4	4	4	0	0	0	0	0	0	4	4	4	0	0	0	0	0	0	4	4	4	0	0	0	0	0	0	32.3	32.3	32.3	21.356	186	186;206;177;64	0	11.309
A2A7B5	ENSMUSG00000057637	110593	A2A7B5	A2A7B5	4	4	4	PR domain containing 2, with ZNF domain	Prdm2	tr|A2A7B5|A2A7B5_MOUSE PR domain-containing 2, with ZNF domain OS=Mus musculus OX=10090 GN=Prdm2 PE=1 SV=1	1	4	4	4	0	2	0	2	1	0	1	2	2	0	2	0	2	1	0	1	2	2	0	2	0	2	1	0	1	2	2	3.3	3.3	3.3	187.2	1709	1709	0	12.824
A2A7S7	ENSMUSG00000028811	107271	A2A7S7;Q91WQ3	A2A7S7;Q91WQ3	4;4	4;4	4;4	Tyrosine--tRNA ligase;Tyrosine--tRNA ligase, cytoplasmic;Tyrosine--tRNA ligase, cytoplasmic, N-terminally processed	Yars	tr|A2A7S7|A2A7S7_MOUSE Tyrosine--tRNA ligase OS=Mus musculus OX=10090 GN=Yars PE=1 SV=1;sp|Q91WQ3|SYYC_MOUSE Tyrosine--tRNA ligase, cytoplasmic OS=Mus musculus OX=10090 GN=Yars1 PE=1 SV=3	2	4	4	4	1	1	1	1	0	2	0	2	3	1	1	1	1	0	2	0	2	3	1	1	1	1	0	2	0	2	3	8	8	8	63.001	564	564;528	0	10.834
A2A848	ENSMUSG00000020777	11430	A2A848;Q9R0H0-2;Q9R0H0	A2A848;Q9R0H0-2;Q9R0H0	1;1;1	1;1;1	1;1;1	Peroxisomal acyl-coenzyme A oxidase 1	Acox1	tr|A2A848|A2A848_MOUSE Peroxisomal acyl-coenzyme A oxidase 1 (Fragment) OS=Mus musculus OX=10090 GN=Acox1 PE=1 SV=1;sp|Q9R0H0-2|ACOX1_MOUSE Isoform 2 of Peroxisomal acyl-coenzyme A oxidase 1 OS=Mus musculus OX=10090 GN=Acox1;sp|Q9R0H0|ACOX1_MOUSE Peroxisom	3	1	1	1	0	1	0	0	0	0	0	0	0	0	1	0	0	0	0	0	0	0	0	1	0	0	0	0	0	0	0	2.1	2.1	2.1	70.03	625	625;661;661	0.0075141	2.5701
A2A8V8	ENSMUSG00000028809	51796	A2A8V8;A2A8V9;E9PUK6;Q52KI8;E9QKA4;Q52KI8-2;F6UK16;A2A983;F7BWM1;F6T4M4	A2A8V8;A2A8V9;E9PUK6;Q52KI8;E9QKA4;Q52KI8-2	16;16;16;16;15;15;5;3;3;2	16;16;16;16;15;15;5;3;3;2	16;16;16;16;15;15;5;3;3;2	Serine/arginine repetitive matrix protein 1	Srrm1	tr|A2A8V8|A2A8V8_MOUSE Serine/arginine repetitive matrix protein 1 OS=Mus musculus OX=10090 GN=Srrm1 PE=1 SV=1;tr|A2A8V9|A2A8V9_MOUSE Serine/arginine repetitive matrix protein 1 OS=Mus musculus OX=10090 GN=Srrm1 PE=1 SV=1;tr|E9PUK6|E9PUK6_MOUSE Serine/argi	10	16	16	16	9	6	10	12	11	8	10	10	11	9	6	10	12	11	8	10	10	11	9	6	10	12	11	8	10	10	11	25.6	25.6	25.6	102.66	909	909;918;923;946;897;897;318;198;239;140	0	148.21
A2A9P6	ENSMUSG00000029062	12537	A2A9P6;P24788-2;P24788	A2A9P6;P24788-2;P24788	5;5;5	5;5;5	5;5;5	Cyclin-dependent kinase 11B	Cdk11b	tr|A2A9P6|A2A9P6_MOUSE Cyclin-dependent kinase 11B OS=Mus musculus OX=10090 GN=Cdk11b PE=1 SV=1;sp|P24788-2|CD11B_MOUSE Isoform 2 of Cyclin-dependent kinase 11B OS=Mus musculus OX=10090 GN=Cdk11b;sp|P24788|CD11B_MOUSE Cyclin-dependent kinase 11B OS=Mus mus	3	5	5	5	2	4	3	3	0	1	0	0	2	2	4	3	3	0	1	0	0	2	2	4	3	3	0	1	0	0	2	7.5	7.5	7.5	87.319	750	750;439;784	0	11.438
A2A9R3	ENSMUSG00000035427	434903	A2A9R3	A2A9R3	21	21	21	MAGE family member B4	Mageb4	sp|A2A9R3|MAGB4_MOUSE Melanoma-associated antigen B4 OS=Mus musculus OX=10090 GN=Mageb4 PE=1 SV=1	1	21	21	21	18	17	18	19	16	17	18	17	19	18	17	18	19	16	17	18	17	19	18	17	18	19	16	17	18	17	19	58.3	58.3	58.3	60.922	556	556	0	323.31
A2ACG7	ENSMUSG00000027642	20014	A2ACG7;Q9DBG6	A2ACG7;Q9DBG6	1;1	1;1	1;1	Dolichyl-diphosphooligosaccharide--protein glycosyltransferase subunit 2	Rpn2	tr|A2ACG7|A2ACG7_MOUSE Dolichyl-diphosphooligosaccharide--protein glycosyltransferase subunit 2 OS=Mus musculus OX=10090 GN=Rpn2 PE=1 SV=1;sp|Q9DBG6|RPN2_MOUSE Dolichyl-diphosphooligosaccharide--protein glycosyltransferase subunit 2 OS=Mus musculus OX=1009	2	1	1	1	0	1	0	0	0	0	0	0	0	0	1	0	0	0	0	0	0	0	0	1	0	0	0	0	0	0	0	2.3	2.3	2.3	67.501	615	615;631	0.0051053	2.7184
A2ADH1	ENSMUSG00000031232	67075	A2ADH1;Q9CQY5-2;Q9CQY5-3;Q9CQY5	A2ADH1;Q9CQY5-2;Q9CQY5-3;Q9CQY5	3;3;3;3	3;3;3;3	3;3;3;3	Magnesium transporter protein 1	Magt1	tr|A2ADH1|A2ADH1_MOUSE Dolichyl-diphosphooligosaccharide--protein glycosyltransferase subunit MAGT1 OS=Mus musculus OX=10090 GN=Magt1 PE=1 SV=1;sp|Q9CQY5-2|MAGT1_MOUSE Isoform 2 of Magnesium transporter protein 1 OS=Mus musculus OX=10090 GN=Magt1;sp|Q9CQY5	4	3	3	3	1	0	1	1	1	0	0	1	1	1	0	1	1	1	0	0	1	1	1	0	1	1	1	0	0	1	1	7.6	7.6	7.6	41.637	368	368;306;312;335	0	5.0721
A2AFI9	ENSMUSG00000031353	245688	A2AFI9;Q60973;A2AFJ1;F6ZLC6;F6U539	A2AFI9;Q60973;A2AFJ1;F6ZLC6	10;10;9;5;2	4;4;3;3;0	4;4;3;3;0	Histone-binding protein RBBP7	Rbbp7	tr|A2AFI9|A2AFI9_MOUSE Histone-binding protein RBBP7 OS=Mus musculus OX=10090 GN=Rbbp7 PE=1 SV=1;sp|Q60973|RBBP7_MOUSE Histone-binding protein RBBP7 OS=Mus musculus OX=10090 GN=Rbbp7 PE=1 SV=1;tr|A2AFJ1|A2AFJ1_MOUSE Histone-binding protein RBBP7 OS=Mus mus	5	10	4	4	7	6	5	8	6	6	4	6	8	3	2	2	4	2	2	1	2	3	3	2	2	4	2	2	1	2	3	26.2	14.8	14.8	43.595	386	386;425;416;235;76	0	13.631
A2AFQ0	ENSMUSG00000025261	59026	A2AFQ0;Q7TMY8-4;Q7TMY8-3;Q7TMY8;F6XP90;Q7TMY8-2;A0A668KL97	A2AFQ0;Q7TMY8-4;Q7TMY8-3;Q7TMY8;F6XP90;Q7TMY8-2	3;3;3;3;2;2;1	3;3;3;3;2;2;1	3;3;3;3;2;2;1	E3 ubiquitin-protein ligase HUWE1	Huwe1	tr|A2AFQ0|A2AFQ0_MOUSE HECT-type E3 ubiquitin transferase OS=Mus musculus OX=10090 GN=Huwe1 PE=1 SV=1;sp|Q7TMY8-4|HUWE1_MOUSE Isoform 4 of E3 ubiquitin-protein ligase HUWE1 OS=Mus musculus OX=10090 GN=Huwe1;sp|Q7TMY8-3|HUWE1_MOUSE Isoform 3 of E3 ubiquitin	7	3	3	3	2	3	0	0	0	0	0	0	0	2	3	0	0	0	0	0	0	0	2	3	0	0	0	0	0	0	0	0.9	0.9	0.9	482.69	4378	4378;3832;4362;4377;1176;3364;226	0	5.2153
A2AFQ9	ENSMUSG00000037275	216766	A2AFQ9;E9PUU4;Q8BX17;F7CKD6	A2AFQ9;E9PUU4;Q8BX17	10;10;10;2	10;10;10;2	10;10;10;2	Gem-associated protein 5	Gemin5	tr|A2AFQ9|A2AFQ9_MOUSE Gem-associated protein 5 OS=Mus musculus OX=10090 GN=Gemin5 PE=1 SV=1;tr|E9PUU4|E9PUU4_MOUSE Gem-associated protein 5 OS=Mus musculus OX=10090 GN=Gemin5 PE=1 SV=1;sp|Q8BX17|GEMI5_MOUSE Gem-associated protein 5 OS=Mus musculus OX=1009	4	10	10	10	2	4	3	2	1	1	2	3	4	2	4	3	2	1	1	2	3	4	2	4	3	2	1	1	2	3	4	7.8	7.8	7.8	166.52	1501	1501;1503;1502;177	0	20.209
A2AG58-2	ENSMUSG00000044150	382252	A2AG58-2;A2AG58;A2AG55;Z4YLY4	A2AG58-2;A2AG58	7;7;2;2	7;7;2;2	7;7;2;2	Uncharacterized protein CXorf23 homolog	Bclaf3	sp|A2AG58-2|BCLA3_MOUSE Isoform 2 of BCLAF1 and THRAP3 family member 3 OS=Mus musculus OX=10090 GN=Bclaf3;sp|A2AG58|BCLA3_MOUSE BCLAF1 and THRAP3 family member 3 OS=Mus musculus OX=10090 GN=Bclaf3 PE=1 SV=1	4	7	7	7	5	1	3	3	2	1	2	1	3	5	1	3	3	2	1	2	1	3	5	1	3	3	2	1	2	1	3	11.7	11.7	11.7	80.608	674	674;752;43;60	0	13.986
A2AGN7	ENSMUSG00000002102	19182	A2AGN7;B7ZCF1;O88685;F6Q2E3;A0A087WPH7	A2AGN7;B7ZCF1;O88685;F6Q2E3;A0A087WPH7	4;4;4;2;2	4;4;4;2;2	4;4;4;2;2	26S protease regulatory subunit 6A	Psmc3	tr|A2AGN7|A2AGN7_MOUSE 26S proteasome regulatory subunit 6A OS=Mus musculus OX=10090 GN=Psmc3 PE=1 SV=1;tr|B7ZCF1|B7ZCF1_MOUSE 26S proteasome regulatory subunit 6A OS=Mus musculus OX=10090 GN=Psmc3 PE=1 SV=1;sp|O88685|PRS6A_MOUSE 26S proteasome regulatory	5	4	4	4	1	3	1	2	0	2	0	1	2	1	3	1	2	0	2	0	1	2	1	3	1	2	0	2	0	1	2	16.2	16.2	16.2	44.669	400	400;451;442;203;305	0	20.314
A2AH85	ENSMUSG00000020929	20624	A2AH85;O08810;G3UZ34;G3UXK8	A2AH85;O08810;G3UZ34	31;31;30;4	30;30;29;3	30;30;29;3	116 kDa U5 small nuclear ribonucleoprotein component	Eftud2	tr|A2AH85|A2AH85_MOUSE 116 kDa U5 small nuclear ribonucleoprotein component OS=Mus musculus OX=10090 GN=Eftud2 PE=1 SV=1;sp|O08810|U5S1_MOUSE 116 kDa U5 small nuclear ribonucleoprotein component OS=Mus musculus OX=10090 GN=Eftud2 PE=1 SV=1;tr|G3UZ34|G3UZ34	4	31	30	30	24	18	23	23	17	22	17	21	23	23	17	23	22	16	21	16	20	22	23	17	23	22	16	21	16	20	22	39.7	38.7	38.7	109.49	972	972;971;962;85	0	225.59
Q4U221	ENSMUSG00000073069	17146	Q4U221;Q60761;A2AHM0;Q9D2H4	Q4U221;Q60761;A2AHM0;Q9D2H4	12;12;12;8	12;12;12;8	12;12;12;8	MAGE family member B2	Mageb2;Mageb1;Mageb3	tr|Q4U221|Q4U221_MOUSE MAGE family member B1 OS=Mus musculus OX=10090 GN=Mageb1 PE=2 SV=1;tr|Q60761|Q60761_MOUSE MAGE family member B1 OS=Mus musculus OX=10090 GN=Mageb1 PE=4 SV=3;tr|A2AHM0|A2AHM0_MOUSE MAGE family member B2 OS=Mus musculus OX=10090 GN=Mag	4	12	12	12	6	5	6	8	6	3	6	9	7	6	5	6	8	6	3	6	9	7	6	5	6	8	6	3	6	9	7	56.1	56.1	56.1	35.936	330	330;380;380;330	0	65.936
A2AHM1	ENSMUSG00000094861	278167	A2AHM1	A2AHM1	3	3	3	MAGE family member B6B1	Gm8914	tr|A2AHM1|A2AHM1_MOUSE MAGE family member B6B1 OS=Mus musculus OX=10090 GN=Mageb6b2 PE=4 SV=1	1	3	3	3	0	0	0	1	1	1	0	1	2	0	0	0	1	1	1	0	1	2	0	0	0	1	1	1	0	1	2	9.9	9.9	9.9	38.421	344	344	0	7.1935
Q9JJR2	ENSMUSG00000067764	27084	Q9JJR2;A2BI49;A2BI50;A2BI45;A2AIE6;A2BI46	Q9JJR2;A2BI49;A2BI50;A2BI45;A2AIE6;A2BI46	3;3;3;3;3;2	3;3;3;3;3;2	3;3;3;3;3;2	X-linked lymphocyte-regulated 5C	Xlr5c;Xlr5b;Xlr5a	sp|Q9JJR2|XLR5C_MOUSE X-linked lymphocyte-regulated protein 5C OS=Mus musculus OX=10090 GN=Xlr5c PE=1 SV=1;tr|A2BI49|A2BI49_MOUSE X-linked lymphocyte-regulated 5B (Fragment) OS=Mus musculus OX=10090 GN=Xlr5b PE=3 SV=1;tr|A2BI50|A2BI50_MOUSE X-linked lympho	6	3	3	3	1	2	2	2	1	1	2	0	3	1	2	2	2	1	1	2	0	3	1	2	2	2	1	1	2	0	3	19	19	19	20.702	179	179;198;236;236;236;203	0	8.2949
A2AJG0	ENSMUSG00000049950	227522	A2AJG0;Q80UU2	A2AJG0;Q80UU2	6;6	6;6	6;6	Ribonuclease P protein subunit p38	Rpp38	tr|A2AJG0|A2AJG0_MOUSE Ribonuclease P protein subunit p38 OS=Mus musculus OX=10090 GN=Rpp38 PE=1 SV=1;sp|Q80UU2|RPP38_MOUSE Ribonuclease P protein subunit p38 OS=Mus musculus OX=10090 GN=Rpp38 PE=1 SV=1	2	6	6	6	2	2	1	2	3	2	3	2	3	2	2	1	2	3	2	3	2	3	2	2	1	2	3	2	3	2	3	26.8	26.8	26.8	31.189	280	280;280	0	15.38
A2AJH3	ENSMUSG00000026643	18108	A2AJH3;O70311;F7APP3;O70310	A2AJH3;O70311;F7APP3	12;12;11;2	12;12;11;2	12;12;11;2	Glycylpeptide N-tetradecanoyltransferase;Glycylpeptide N-tetradecanoyltransferase 2	Nmt2	tr|A2AJH3|A2AJH3_MOUSE Glycylpeptide N-tetradecanoyltransferase OS=Mus musculus OX=10090 GN=Nmt2 PE=1 SV=1;sp|O70311|NMT2_MOUSE Glycylpeptide N-tetradecanoyltransferase 2 OS=Mus musculus OX=10090 GN=Nmt2 PE=1 SV=1;tr|F7APP3|F7APP3_MOUSE Glycylpeptide N-tet	4	12	12	12	7	7	6	8	7	8	7	7	9	7	7	6	8	7	8	7	7	9	7	7	6	8	7	8	7	7	9	32.5	32.5	32.5	56.984	498	498;529;485;496	0	121.82
F6WF36	ENSMUSG00000028849	245877	F6WF36;A2AJI1;A8Y5P4;A2AJI0-2;A2AJI0	F6WF36;A2AJI1;A8Y5P4;A2AJI0-2;A2AJI0	2;2;2;2;2	2;2;2;2;2	2;2;2;2;2	MAP7 domain-containing protein 1	Map7d1	tr|F6WF36|F6WF36_MOUSE MAP7 domain-containing protein 1 (Fragment) OS=Mus musculus OX=10090 GN=Map7d1 PE=1 SV=1;tr|A2AJI1|A2AJI1_MOUSE MAP7 domain-containing protein 1 OS=Mus musculus OX=10090 GN=Map7d1 PE=1 SV=1;tr|A8Y5P4|A8Y5P4_MOUSE MAP7 domain-containi	5	2	2	2	1	0	2	1	1	0	1	1	1	1	0	2	1	1	0	1	1	1	1	0	2	1	1	0	1	1	1	4.6	4.6	4.6	65.168	591	591;774;814;809;846	0	4.4649
B1AYU4	ENSMUSG00000027014	80744	B1AYU4;A2AK44;A2AK42;B1AYU7;Q8C5N3-2;Q8C5N3;J3QNR0;J3QM48	B1AYU4;A2AK44;A2AK42;B1AYU7;Q8C5N3-2;Q8C5N3;J3QNR0;J3QM48	4;4;4;4;4;4;2;2	4;4;4;4;4;4;2;2	4;4;4;4;4;4;2;2	Pre-mRNA-splicing factor CWC22 homolog	Cwc22;Gm13695;Gm13697;Gm13698	tr|B1AYU4|B1AYU4_MOUSE Pre-mRNA-splicing factor CWC22 homolog OS=Mus musculus OX=10090 GN=Cwc22 PE=1 SV=1;tr|A2AK44|A2AK44_MOUSE Predicted gene 13695 OS=Mus musculus OX=10090 GN=Gm13695 PE=4 SV=1;tr|A2AK42|A2AK42_MOUSE Predicted gene 13691 OS=Mus musculus	8	4	4	4	4	2	3	1	0	1	2	1	1	4	2	3	1	0	1	2	1	1	4	2	3	1	0	1	2	1	1	6.4	6.4	6.4	82.752	723	723;830;830;903;902;908;243;243	0	12.766
A2BIN1	ENSMUSG00000078680	100039008	A2BIN1;A2AKN8;P04938;P02762;A2BIM8;Q4FZE8;B8JI96;A2AKN9;A2CEK7;A9C497;Q58EV3;A2BIN0;A9R9W0;A2CEK6;A2CEL1;A9C496;B5X0G2;P11588;P11589;E9PVW0;A2CEL0;E9QA79;A2CEK9;L7MUC7;L7N222;P11591	A2BIN1;A2AKN8;P04938;P02762;A2BIM8;Q4FZE8;B8JI96;A2AKN9;A2CEK7;A9C497;Q58EV3;A2BIN0;A9R9W0;A2CEK6;A2CEL1;A9C496;B5X0G2;P11588;P11589;E9PVW0	3;3;3;3;3;3;3;3;3;2;2;2;2;2;2;2;2;2;2;2;1;1;1;1;1;1	3;3;3;3;3;3;3;3;3;2;2;2;2;2;2;2;2;2;2;2;1;1;1;1;1;1	3;3;3;3;3;3;3;3;3;2;2;2;2;2;2;2;2;2;2;2;1;1;1;1;1;1	Major urinary proteins 11 and 8;Major urinary protein 6;Major urinary protein 17;Major urinary protein 1;Major urinary protein 2	Mup10;Mup8;Mup6;Mup9;Mup1;Mup14;Mup4;Mup19;Mup11;Mup15;Mup13;Mup17;Mup2	tr|A2BIN1|A2BIN1_MOUSE Major urinary protein 10 OS=Mus musculus OX=10090 GN=Mup10 PE=2 SV=1;tr|A2AKN8|A2AKN8_MOUSE Major urinary protein 5 OS=Mus musculus OX=10090 GN=Mup8 PE=3 SV=1;sp|P04938|MUP11_MOUSE Major urinary protein 11 OS=Mus musculus OX=10090 GN	26	3	3	3	1	0	2	0	0	0	0	3	0	1	0	2	0	0	0	0	3	0	1	0	2	0	0	0	0	3	0	17.2	17.2	17.2	20.681	180	180;180;181;180;181;181;150;180;180;187;180;94;180;180;180;235;180;180;180;235;235;235;30;171;235;180	0	7.7562
Q8C2Q8	ENSMUSG00000025781	11949	Q8C2Q8;A2AKU9;Q91VR2;A2AKV1;A2AKV2;A2AKV3;A2AKV0	Q8C2Q8;A2AKU9;Q91VR2;A2AKV1;A2AKV2;A2AKV3;A2AKV0	6;6;6;5;5;5;3	6;6;6;5;5;5;3	6;6;6;5;5;5;3	ATP synthase subunit gamma;ATP synthase subunit gamma, mitochondrial	Atp5c1	tr|Q8C2Q8|Q8C2Q8_MOUSE ATP synthase subunit gamma OS=Mus musculus OX=10090 GN=Atp5c1 PE=1 SV=1;tr|A2AKU9|A2AKU9_MOUSE ATP synthase subunit gamma OS=Mus musculus OX=10090 GN=Atp5c1 PE=1 SV=1;sp|Q91VR2|ATPG_MOUSE ATP synthase subunit gamma, mitochondrial OS=	7	6	6	6	4	2	4	4	5	3	6	4	3	4	2	4	4	5	3	6	4	3	4	2	4	4	5	3	6	4	3	23	23	23	30.255	274	274;297;298;154;171;188;101	0	17.798
A2AL12	ENSMUSG00000059005	229279	A2AL12;Q8BG05;A2AL13;V9GX38	A2AL12;Q8BG05	13;13;2;2	13;13;2;2	3;3;0;0	Heterogeneous nuclear ribonucleoprotein A3	Hnrnpa3	tr|A2AL12|A2AL12_MOUSE Heterogeneous nuclear ribonucleoprotein A3 OS=Mus musculus OX=10090 GN=Hnrnpa3 PE=1 SV=1;sp|Q8BG05|ROA3_MOUSE Heterogeneous nuclear ribonucleoprotein A3 OS=Mus musculus OX=10090 GN=Hnrnpa3 PE=1 SV=1	4	13	13	3	10	9	10	10	10	11	10	10	12	10	9	10	10	10	11	10	10	12	2	2	2	2	2	2	2	2	3	43.7	43.7	9.4	34.476	318	318;379;194;357	0	276.21
A2ALB1	ENSMUSG00000052406	227656	A2ALB1;A2ALB2;Q6PAQ4	A2ALB1;A2ALB2;Q6PAQ4	9;9;9	9;9;9	9;9;9	RNA exonuclease 4	Rexo4	tr|A2ALB1|A2ALB1_MOUSE RNA exonuclease 4 (Fragment) OS=Mus musculus OX=10090 GN=Rexo4 PE=1 SV=1;tr|A2ALB2|A2ALB2_MOUSE RNA exonuclease 4 OS=Mus musculus OX=10090 GN=Rexo4 PE=1 SV=1;sp|Q6PAQ4|REXO4_MOUSE RNA exonuclease 4 OS=Mus musculus OX=10090 GN=Rexo4 P	3	9	9	9	2	3	4	7	4	4	3	4	6	2	3	4	7	4	4	3	4	6	2	3	4	7	4	4	3	4	6	34.2	34.2	34.2	40.096	363	363;409;432	0	25.94
A2ALR8	ENSMUSG00000043411	170707	A2ALR8;A2ALR9;Q3V0C5-4;Q3V0C5-3;Q3V0C5;Q3V0C5-5;Q3V0C5-2	A2ALR8;A2ALR9;Q3V0C5-4;Q3V0C5-3;Q3V0C5;Q3V0C5-5;Q3V0C5-2	1;1;1;1;1;1;1	1;1;1;1;1;1;1	1;1;1;1;1;1;1	Ubiquitin carboxyl-terminal hydrolase 48	Usp48	tr|A2ALR8|A2ALR8_MOUSE Ubiquitinyl hydrolase 1 (Fragment) OS=Mus musculus OX=10090 GN=Usp48 PE=1 SV=1;tr|A2ALR9|A2ALR9_MOUSE Ubiquitinyl hydrolase 1 OS=Mus musculus OX=10090 GN=Usp48 PE=1 SV=1;sp|Q3V0C5-4|UBP48_MOUSE Isoform 4 of Ubiquitin carboxyl-termina	7	1	1	1	1	0	0	1	0	0	1	1	1	1	0	0	1	0	0	1	1	1	1	0	0	1	0	0	1	1	1	2.7	2.7	2.7	72.684	631	631;1036;484;485;1052;1053;1080	0.002027	3.214
A2AMV1	ENSMUSG00000028741	69902	A2AMV1;Q9D0I8	A2AMV1;Q9D0I8	3;3	3;3	3;3	mRNA turnover protein 4 homolog	Mrto4	tr|A2AMV1|A2AMV1_MOUSE Ribosome assembly factor mrt4 OS=Mus musculus OX=10090 GN=Mrto4 PE=1 SV=1;sp|Q9D0I8|MRT4_MOUSE mRNA turnover protein 4 homolog OS=Mus musculus OX=10090 GN=Mrto4 PE=1 SV=1	2	3	3	3	0	0	0	1	2	1	1	1	1	0	0	0	1	2	1	1	1	1	0	0	0	1	2	1	1	1	1	13.4	13.4	13.4	27.417	238	238;239	0	4.7373
A2AMY7	ENSMUSG00000028433	68926	A2AMY7;A2AMY5;Q91VX2	A2AMY7;A2AMY5;Q91VX2	1;1;1	1;1;1	1;1;1	Ubiquitin-associated protein 2	Ubap2	tr|A2AMY7|A2AMY7_MOUSE Ubiquitin-associated protein 2 (Fragment) OS=Mus musculus OX=10090 GN=Ubap2 PE=1 SV=1;tr|A2AMY5|A2AMY5_MOUSE Ubiquitin-associated protein 2 OS=Mus musculus OX=10090 GN=Ubap2 PE=1 SV=1;sp|Q91VX2|UBAP2_MOUSE Ubiquitin-associated protei	3	1	1	1	1	0	0	1	1	0	1	1	1	1	0	0	1	1	0	1	1	1	1	0	0	1	1	0	1	1	1	6.6	6.6	6.6	23.885	227	227;1131;1132	0.0092308	2.4728
A2ANX3	ENSMUSG00000060131	241633	A2ANX3	A2ANX3	1	1	1	Phospholipid-transporting ATPase	Atp8b4	tr|A2ANX3|A2ANX3_MOUSE Phospholipid-transporting ATPase OS=Mus musculus OX=10090 GN=Atp8b4 PE=1 SV=1	1	1	1	1	0	0	0	0	0	1	0	0	0	0	0	0	0	0	1	0	0	0	0	0	0	0	0	1	0	0	0	0.8	0.8	0.8	135.14	1194	1194	0.0013899	3.5872
A2ANY6	ENSMUSG00000058006	100019	A2ANY6;J3QMC5	A2ANY6;J3QMC5	92;91	92;91	92;91	midasin AAA ATPase 1	Mdn1	tr|A2ANY6|A2ANY6_MOUSE Midasin OS=Mus musculus OX=10090 GN=Mdn1 PE=1 SV=1;tr|J3QMC5|J3QMC5_MOUSE Midasin OS=Mus musculus OX=10090 GN=Mdn1 PE=1 SV=1	2	92	92	92	61	37	60	53	33	43	49	49	59	61	37	60	53	33	43	49	49	59	61	37	60	53	33	43	49	49	59	21.5	21.5	21.5	630.33	5589	5589;5582	0	308.93
A2APB8	ENSMUSG00000027469	72119	A2APB8	A2APB8	4	4	4	Targeting protein for Xklp2	Tpx2	sp|A2APB8|TPX2_MOUSE Targeting protein for Xklp2 OS=Mus musculus OX=10090 GN=Tpx2 PE=1 SV=1	1	4	4	4	0	1	0	4	2	1	0	1	2	0	1	0	4	2	1	0	1	2	0	1	0	4	2	1	0	1	2	6.2	6.2	6.2	85.893	745	745	0	7.6526
A2AQA7	ENSMUSG00000040383	11834	A2AQA7;Q8CFQ3	A2AQA7;Q8CFQ3	6;6	6;6	6;6	Intron-binding protein aquarius	Aqr	tr|A2AQA7|A2AQA7_MOUSE RNA helicase aquarius OS=Mus musculus OX=10090 GN=Aqr PE=1 SV=1;sp|Q8CFQ3|AQR_MOUSE RNA helicase aquarius OS=Mus musculus OX=10090 GN=Aqr PE=1 SV=2	2	6	6	6	0	0	1	2	0	2	2	1	4	0	0	1	2	0	2	2	1	4	0	0	1	2	0	2	2	1	4	4.7	4.7	4.7	161.85	1400	1400;1481	0	10.458
A2AQH4	ENSMUSG00000036959	320376	A2AQH4;F8WJL9;F6ZBD9	A2AQH4;F8WJL9	3;3;1	3;3;1	3;3;1	BCL-6 corepressor-like protein 1	Bcorl1	sp|A2AQH4|BCORL_MOUSE BCL-6 corepressor-like protein 1 OS=Mus musculus OX=10090 GN=Bcorl1 PE=2 SV=1;tr|F8WJL9|F8WJL9_MOUSE BCL-6 corepressor-like protein 1 (Fragment) OS=Mus musculus OX=10090 GN=Bcorl1 PE=1 SV=1	3	3	3	3	0	0	0	1	0	2	0	2	1	0	0	0	1	0	2	0	2	1	0	0	0	1	0	2	0	2	1	3.3	3.3	3.3	190.48	1781	1781;1693;746	0	10.53
A2AR02	ENSMUSG00000042133	228005	A2AR02;A2AR01	A2AR02	9;4	9;4	9;4	Peptidyl-prolyl cis-trans isomerase G	Ppig	sp|A2AR02|PPIG_MOUSE Peptidyl-prolyl cis-trans isomerase G OS=Mus musculus OX=10090 GN=Ppig PE=1 SV=1	2	9	9	9	7	7	6	7	6	5	6	7	7	7	7	6	7	6	5	6	7	7	7	7	6	7	6	5	6	7	7	14	14	14	88.324	752	752;127	0	66.657
A2ARP5	ENSMUSG00000000308	12716	A2ARP5;P30275;B0R0E8;B0R0E9;B0R0F0	A2ARP5;P30275;B0R0E8;B0R0E9;B0R0F0	2;2;1;1;1	2;2;1;1;1	2;2;1;1;1	Creatine kinase U-type, mitochondrial	Ckmt1	tr|A2ARP5|A2ARP5_MOUSE Creatine kinase (Fragment) OS=Mus musculus OX=10090 GN=Ckmt1 PE=1 SV=1;sp|P30275|KCRU_MOUSE Creatine kinase U-type, mitochondrial OS=Mus musculus OX=10090 GN=Ckmt1 PE=1 SV=1;tr|B0R0E8|B0R0E8_MOUSE Creatine kinase U-type, mitochondria	5	2	2	2	0	2	0	0	0	0	0	0	0	0	2	0	0	0	0	0	0	0	0	2	0	0	0	0	0	0	0	13.9	13.9	13.9	27.744	251	251;418;117;149;204	0.0020367	3.2609
A2AT02	ENSMUSG00000027455	386649	A2AT02;Q9CZ44-2;Q9CZ44;Q9CZ44-3	A2AT02;Q9CZ44-2;Q9CZ44;Q9CZ44-3	2;2;2;2	2;2;2;2	2;2;2;2	NSFL1 cofactor p47	Nsfl1c	tr|A2AT02|A2AT02_MOUSE NSFL1 cofactor p47 OS=Mus musculus OX=10090 GN=Nsfl1c PE=1 SV=1;sp|Q9CZ44-2|NSF1C_MOUSE Isoform 2 of NSFL1 cofactor p47 OS=Mus musculus OX=10090 GN=Nsfl1c;sp|Q9CZ44|NSF1C_MOUSE NSFL1 cofactor p47 OS=Mus musculus OX=10090 GN=Nsfl1c PE	4	2	2	2	0	2	0	0	0	0	0	0	0	0	2	0	0	0	0	0	0	0	0	2	0	0	0	0	0	0	0	7.1	7.1	7.1	37.436	339	339;264;370;372	0	5.5251
A2ATP5	ENSMUSG00000027201	17876	A2ATP5;A2ATP6;Q8C854-3;Q8C854;G8JL68;Q8C854-1;Q8C854-2;F6XJA1	A2ATP5;A2ATP6;Q8C854-3;Q8C854;G8JL68;Q8C854-1;Q8C854-2;F6XJA1	10;10;10;10;8;8;8;6	10;10;10;10;8;8;8;6	10;10;10;10;8;8;8;6	Myelin expression factor 2	Myef2	tr|A2ATP5|A2ATP5_MOUSE Myelin expression factor 2 OS=Mus musculus OX=10090 GN=Myef2 PE=1 SV=1;tr|A2ATP6|A2ATP6_MOUSE Myelin expression factor 2 OS=Mus musculus OX=10090 GN=Myef2 PE=1 SV=2;sp|Q8C854-3|MYEF2_MOUSE Isoform 2 of Myelin expression factor 2 OS=M	8	10	10	10	7	4	6	9	7	4	6	9	7	7	4	6	9	7	4	6	9	7	7	4	6	9	7	4	6	9	7	20.4	20.4	20.4	59.543	550	550;567;574;591;530;488;498;446	0	118.52
A2ATU9	ENSMUSG00000027018	107435	A2ATU9;Q8BY71	A2ATU9;Q8BY71	6;6	6;6	6;6	Histone acetyltransferase type B catalytic subunit	Hat1	tr|A2ATU9|A2ATU9_MOUSE Histone acetyltransferase type B catalytic subunit OS=Mus musculus OX=10090 GN=Hat1 PE=1 SV=1;sp|Q8BY71|HAT1_MOUSE Histone acetyltransferase type B catalytic subunit OS=Mus musculus OX=10090 GN=Hat1 PE=1 SV=1	2	6	6	6	3	1	2	5	0	2	3	2	4	3	1	2	5	0	2	3	2	4	3	1	2	5	0	2	3	2	4	18.7	18.7	18.7	50.182	423	423;416	0	14.708
Q8VBV3	ENSMUSG00000039356	227715	Q8VBV3;A2AV19;A0A0A6YW57	Q8VBV3;A2AV19	5;5;1	5;5;1	5;5;1	Exosome complex component RRP4	Exosc2	sp|Q8VBV3|EXOS2_MOUSE Exosome complex component RRP4 OS=Mus musculus OX=10090 GN=Exosc2 PE=1 SV=1;tr|A2AV19|A2AV19_MOUSE Ribosomal RNA-processing protein 4 (Fragment) OS=Mus musculus OX=10090 GN=Exosc2 PE=1 SV=1	3	5	5	5	3	4	2	4	3	3	2	3	2	3	4	2	4	3	3	2	3	2	3	4	2	4	3	3	2	3	2	19.5	19.5	19.5	32.631	293	293;247;74	0	12.937
A2AVJ7	ENSMUSG00000027422	81910	A2AVJ7;Q99PL5;Q99PL5-8;Q99PL5-7;Q99PL5-6;Q99PL5-5;Q99PL5-4;Q99PL5-3;Q99PL5-2;Q99PL5-12;Q99PL5-11;Q99PL5-10	A2AVJ7;Q99PL5	48;48;7;7;7;7;7;7;7;6;6;6	48;48;7;7;7;7;7;7;7;6;6;6	42;42;1;1;1;1;1;1;1;0;0;0	Ribosome-binding protein 1	Rrbp1	tr|A2AVJ7|A2AVJ7_MOUSE Ribosome-binding protein 1 OS=Mus musculus OX=10090 GN=Rrbp1 PE=1 SV=1;sp|Q99PL5|RRBP1_MOUSE Ribosome-binding protein 1 OS=Mus musculus OX=10090 GN=Rrbp1 PE=1 SV=2	12	48	48	42	32	29	39	38	38	34	32	37	39	32	29	39	38	38	34	32	37	39	26	25	33	32	32	29	26	31	34	36.7	36.7	30.2	158.39	1464	1464;1605;330;380;380;398;641;701;842;209;229;250	0	323.31
A2AWT6	ENSMUSG00000020923	21429	A2AWT6;A2AWT7;A2AWT5;P25976-2;P25976;E9Q4A8;G3UZW9	A2AWT6;A2AWT7;A2AWT5;P25976-2;P25976	14;14;14;14;14;4;3	14;14;14;14;14;4;3	14;14;14;14;14;4;3	Nucleolar transcription factor 1	Ubtf	tr|A2AWT6|A2AWT6_MOUSE Nucleolar transcription factor 1 OS=Mus musculus OX=10090 GN=Ubtf PE=1 SV=1;tr|A2AWT7|A2AWT7_MOUSE Nucleolar transcription factor 1 OS=Mus musculus OX=10090 GN=Ubtf PE=1 SV=1;tr|A2AWT5|A2AWT5_MOUSE Nucleolar transcription factor 1 OS	7	14	14	14	10	9	10	11	12	9	8	8	9	10	9	10	11	12	9	8	8	9	10	9	10	11	12	9	8	8	9	22.3	22.3	22.3	85.009	727	727;752;764;728;765;169;151	0	76.598
A2BDX3	ENSMUSG00000074576	69372	A2BDX3	A2BDX3	1	1	1	Adenylyltransferase and sulfurtransferase MOCS3;Molybdopterin-synthase adenylyltransferase;Molybdopterin-synthase sulfurtransferase	Mocs3	sp|A2BDX3|MOCS3_MOUSE Adenylyltransferase and sulfurtransferase MOCS3 OS=Mus musculus OX=10090 GN=Mocs3 PE=1 SV=1	1	1	1	1	1	1	1	1	1	1	1	0	1	1	1	1	1	1	1	1	0	1	1	1	1	1	1	1	1	0	1	2	2	2	49.374	460	460	0.009768	2.4257
A2BE28-2	ENSMUSG00000057421	76130	A2BE28-2;A2BE28	A2BE28-2;A2BE28	10;10	10;10	10;10	Ribosomal biogenesis protein LAS1L	Las1l	sp|A2BE28-2|LAS1L_MOUSE Isoform 2 of Ribosomal biogenesis protein LAS1L OS=Mus musculus OX=10090 GN=Las1l;sp|A2BE28|LAS1L_MOUSE Ribosomal biogenesis protein LAS1L OS=Mus musculus OX=10090 GN=Las1l PE=1 SV=1	2	10	10	10	3	3	4	3	2	3	3	2	4	3	3	4	3	2	3	3	2	4	3	3	4	3	2	3	3	2	4	15.8	15.8	15.8	87.577	759	759;776	0	27.946
A2BFF8	ENSMUSG00000027012	13427	A2BFF8;Q3TPJ8;A2BFF5;A2BFF9;O88487;Q3TYJ3;D3Z0M6;O88485-2;O88485	A2BFF8;Q3TPJ8;A2BFF5;A2BFF9;O88487	4;4;4;4;4;1;1;1;1	4;4;4;4;4;1;1;1;1	4;4;4;4;4;1;1;1;1	Cytoplasmic dynein 1 intermediate chain 2	Dync1i2	tr|A2BFF8|A2BFF8_MOUSE Cytoplasmic dynein 1 intermediate chain 2 OS=Mus musculus OX=10090 GN=Dync1i2 PE=1 SV=1;tr|Q3TPJ8|Q3TPJ8_MOUSE Cytoplasmic dynein 1 intermediate chain 2 OS=Mus musculus OX=10090 GN=Dync1i2 PE=1 SV=1;tr|A2BFF5|A2BFF5_MOUSE Cytoplasmic	9	4	4	4	1	2	0	2	0	0	0	0	1	1	2	0	2	0	0	0	0	1	1	2	0	2	0	0	0	0	1	8.5	8.5	8.5	68.265	611	611;632;637;638;612;617;645;608;628	0	10.774
Q62012	ENSMUSG00000094885	18422	Q62012;L7MU67;A2BI02;E9QA14;A2BI72;B1B0X6	Q62012;L7MU67;A2BI02;E9QA14;A2BI72;B1B0X6	11;11;11;10;10;9	11;11;11;10;10;9	0;0;0;0;0;0	ovary testis transcribed	Ott;Gm15097;Gm15080;Gm15093;Gm15114	tr|Q62012|Q62012_MOUSE Ott protein OS=Mus musculus OX=10090 GN=Gm15085 PE=2 SV=1;tr|L7MU67|L7MU67_MOUSE Predicted gene 15097 OS=Mus musculus OX=10090 GN=Gm15097 PE=4 SV=1;tr|A2BI02|A2BI02_MOUSE Predicted gene 15080 OS=Mus musculus OX=10090 GN=Gm15080 PE=4	6	11	11	0	11	8	9	8	8	9	9	8	11	11	8	9	8	8	9	9	8	11	0	0	0	0	0	0	0	0	0	26.7	26.7	0	52.825	449	449;449;449;449;449;433	0	90.538
G5E8W8	ENSMUSG00000031351	22673	G5E8W8;A2BI37;Q62394	G5E8W8;A2BI37;Q62394	1;1;1	1;1;1	1;1;1	Zinc finger protein 185	Zfp185;Znf185	tr|G5E8W8|G5E8W8_MOUSE Zinc finger protein 185 OS=Mus musculus OX=10090 GN=Zfp185 PE=1 SV=1;tr|A2BI37|A2BI37_MOUSE Zinc finger protein 185 OS=Mus musculus OX=10090 GN=Zfp185 PE=1 SV=1;sp|Q62394|ZN185_MOUSE Zinc finger protein 185 OS=Mus musculus OX=10090 G	3	1	1	1	0	1	0	0	0	0	0	0	0	0	1	0	0	0	0	0	0	0	0	1	0	0	0	0	0	0	0	2.1	2.1	2.1	52.871	486	486;485;352	0.0013918	3.5953
A2CES4	ENSMUSG00000008333	20639	A2CES4;Q9CQI7	A2CES4;Q9CQI7	1;1	1;1	1;1	U2 small nuclear ribonucleoprotein B	Snrpb2	tr|A2CES4|A2CES4_MOUSE U2 small nuclear ribonucleoprotein B (Fragment) OS=Mus musculus OX=10090 GN=Snrpb2 PE=1 SV=1;sp|Q9CQI7|RU2B_MOUSE U2 small nuclear ribonucleoprotein B OS=Mus musculus OX=10090 GN=Snrpb2 PE=1 SV=1	2	1	1	1	1	1	1	1	0	1	1	1	1	1	1	1	1	0	1	1	1	1	1	1	1	1	0	1	1	1	1	7.7	7.7	7.7	16.009	143	143;225	0.0092138	2.4607
A2CG76	ENSMUSG00000013787	110147	A2CG76;Q9Z148-2;Q9Z148-3;Q9Z148;G3UYH7;A2CG77	A2CG76;Q9Z148-2;Q9Z148-3;Q9Z148	5;5;5;5;1;1	5;5;5;5;1;1	4;4;4;4;1;1	Histone-lysine N-methyltransferase EHMT2	Ehmt2	tr|A2CG76|A2CG76_MOUSE Histone-lysine N-methyltransferase EHMT2 OS=Mus musculus OX=10090 GN=Ehmt2 PE=1 SV=1;sp|Q9Z148-2|EHMT2_MOUSE Isoform 2 of Histone-lysine N-methyltransferase EHMT2 OS=Mus musculus OX=10090 GN=Ehmt2;sp|Q9Z148-3|EHMT2_MOUSE Isoform 3 of	6	5	5	4	2	1	2	3	2	2	1	0	1	2	1	2	3	2	2	1	0	1	2	0	2	3	2	1	1	0	1	5.5	5.5	4.7	134.69	1229	1229;1172;1206;1263;194;441	0	14.743
A3KFM8	ENSMUSG00000057133	71389	A3KFM8;A3KFM7-2;A3KFM7;A3KFM6	A3KFM8;A3KFM7-2;A3KFM7;A3KFM6	2;2;2;1	2;2;2;1	2;2;2;1	Chromodomain-helicase-DNA-binding protein 6	Chd6	tr|A3KFM8|A3KFM8_MOUSE DNA helicase (Fragment) OS=Mus musculus OX=10090 GN=Chd6 PE=1 SV=8;sp|A3KFM7-2|CHD6_MOUSE Isoform 2 of Chromodomain-helicase-DNA-binding protein 6 OS=Mus musculus OX=10090 GN=Chd6;sp|A3KFM7|CHD6_MOUSE Chromodomain-helicase-DNA-bindin	4	2	2	2	1	0	1	1	0	0	0	1	2	1	0	1	1	0	0	0	1	2	1	0	1	1	0	0	0	1	2	2.4	2.4	2.4	136.86	1183	1183;2710;2711;217	0	8.9933
A3KFU5	ENSMUSG00000011257	230721	A3KFU5;Q6PHQ9;Q91YZ8;A3KFU8;V9GXG3;A0A0A6YWT2;G5E8X2	A3KFU5;Q6PHQ9;Q91YZ8;A3KFU8	21;21;19;19;6;1;1	13;13;11;11;3;1;1	12;12;10;10;2;0;0	Polyadenylate-binding protein	Pabpc4	tr|A3KFU5|A3KFU5_MOUSE Polyadenylate-binding protein OS=Mus musculus OX=10090 GN=Pabpc4 PE=1 SV=1;tr|Q6PHQ9|Q6PHQ9_MOUSE Polyadenylate-binding protein OS=Mus musculus OX=10090 GN=Pabpc4 PE=1 SV=1;tr|Q91YZ8|Q91YZ8_MOUSE Polyadenylate-binding protein OS=Mus	7	21	13	12	18	15	16	16	12	15	10	11	15	10	8	9	10	8	9	4	5	9	10	7	9	10	8	8	4	5	9	36.5	19.7	18.2	69.43	631	631;660;615;644;168;172;370	0	36.037
A6H5X4-3	ENSMUSG00000068245	219132	A6H5X4-3;A6H5X4;A6H5X4-2;B4XVP9	A6H5X4-3;A6H5X4;A6H5X4-2	4;4;3;1	4;4;3;1	4;4;3;1	PHD finger protein 11	Phf11	sp|A6H5X4-3|PHF11_MOUSE Isoform 3 of PHD finger protein 11 OS=Mus musculus OX=10090 GN=Phf11;sp|A6H5X4|PHF11_MOUSE PHD finger protein 11 OS=Mus musculus OX=10090 GN=Phf11 PE=2 SV=1;sp|A6H5X4-2|PHF11_MOUSE Isoform 2 of PHD finger protein 11 OS=Mus musculus	4	4	4	4	1	1	0	3	0	3	1	2	2	1	1	0	3	0	3	1	2	2	1	1	0	3	0	3	1	2	2	15	15	15	36	320	320;337;269;339	0	9.7661
E9Q5Q3	ENSMUSG00000091568	666637	E9Q5Q3;E9Q032;E9PW72;Q5FWC9;K7N6Y2;K7N708;K7N757;L7N2B6;L7N2C2;E9Q501;L7N296;K7N6V4;E9QAJ8;E9PVJ0;E9PUT9;E9Q5P1;L7N2B9;L7N2C5;M0QW81;A6NAS4;E9Q257;E9Q7M8;L7N281;A6NAT8;L7N295;Q9D073;A6NAT4;Q8C7R2;A6NAU1;K7N6Y8;K7N6T7;A6NAS7;A6NAS6;E9Q9Z8;K7N721;K7N6X2;L7N2A7;L7N2D5;K7N751;K7N6U2	E9Q5Q3;E9Q032;E9PW72;Q5FWC9;K7N6Y2;K7N708;K7N757;L7N2B6;L7N2C2;E9Q501;L7N296;K7N6V4;E9QAJ8;E9PVJ0;E9PUT9;E9Q5P1;L7N2B9;L7N2C5;M0QW81;A6NAS4;E9Q257;E9Q7M8;L7N281;A6NAT8;L7N295;Q9D073;A6NAT4;Q8C7R2;A6NAU1;K7N6Y8;K7N6T7;A6NAS7;A6NAS6;E9Q9Z8;K7N721;K7N6X2;L7N2A7;L7N2D5;K7N751;K7N6U2	1;1;1;1;1;1;1;1;1;1;1;1;1;1;1;1;1;1;1;1;1;1;1;1;1;1;1;1;1;1;1;1;1;1;1;1;1;1;1;1	1;1;1;1;1;1;1;1;1;1;1;1;1;1;1;1;1;1;1;1;1;1;1;1;1;1;1;1;1;1;1;1;1;1;1;1;1;1;1;1	1;1;1;1;1;1;1;1;1;1;1;1;1;1;1;1;1;1;1;1;1;1;1;1;1;1;1;1;1;1;1;1;1;1;1;1;1;1;1;1	predicted gene 8206	Gm8206;Gm3512;Gm3002;Gm3558;Gm3629;Gm10340;Gm3667;Gm2974;Gm2237;Gm3739;Gm3642;Gm3468;Gm3005;Gm3252;Gm3636;Gm3164;Gm3264;Gm3488;Gm10406;Gm8237;Gm5796;Gm3298;Gm3317;2610042L04Rik;Gm3752;Gm3411;Gm8265;Gm2897;Gm3373;Gm3383;Gm3173;Gm3248;Gm3591;Gm6356;Gm8281;Gm3696;Gm3542	tr|E9Q5Q3|E9Q5Q3_MOUSE Predicted gene 8206 OS=Mus musculus OX=10090 GN=Gm8206 PE=4 SV=1;tr|E9Q032|E9Q032_MOUSE Predicted gene 3512 OS=Mus musculus OX=10090 GN=Gm3512 PE=4 SV=1;tr|E9PW72|E9PW72_MOUSE Predicted gene 3002 OS=Mus musculus OX=10090 GN=Gm3002 PE	40	1	1	1	0	0	0	0	0	0	1	0	0	0	0	0	0	0	0	1	0	0	0	0	0	0	0	0	1	0	0	9.8	9.8	9.8	15.644	133	133;133;216;205;205;205;205;205;205;211;216;267;216;216;216;227;238;238;238;205;205;205;171;172;148;150;150;150;156;158;172;205;205;172;186;186;188;197;203;270	1	-2
A6PWY4	ENSMUSG00000027242	241627	A6PWY4;A6PWY4-2;A6PWY4-3;Z4YK23	A6PWY4;A6PWY4-2	12;11;3;2	12;11;3;2	12;11;3;2	WD repeat-containing protein 76	Wdr76	sp|A6PWY4|WDR76_MOUSE WD repeat-containing protein 76 OS=Mus musculus OX=10090 GN=Wdr76 PE=1 SV=1;sp|A6PWY4-2|WDR76_MOUSE Isoform 2 of WD repeat-containing protein 76 OS=Mus musculus OX=10090 GN=Wdr76	4	12	12	12	5	5	5	5	5	3	6	9	9	5	5	5	5	5	3	6	9	9	5	5	5	5	5	3	6	9	9	22.5	22.5	22.5	69.007	622	622;524;418;320	0	36.476
A6X8Z3	ENSMUSG00000033581	319765	A6X8Z3;Q5SF07-2;Q5SF07	A6X8Z3;Q5SF07-2;Q5SF07	3;3;3	2;2;2	2;2;2	Insulin-like growth factor 2 mRNA-binding protein 2	Igf2bp2	tr|A6X8Z3|A6X8Z3_MOUSE Insulin-like growth factor 2 mRNA-binding protein 2 OS=Mus musculus OX=10090 GN=Igf2bp2 PE=1 SV=1;sp|Q5SF07-2|IF2B2_MOUSE Isoform 2 of Insulin-like growth factor 2 mRNA-binding protein 2 OS=Mus musculus OX=10090 GN=Igf2bp2;sp|Q5SF07|	3	3	2	2	1	0	3	2	1	1	0	1	2	0	0	2	1	0	0	0	0	1	0	0	2	1	0	0	0	0	1	7.3	4.8	4.8	58.039	524	524;530;592	0	5.0566
A6ZI44	ENSMUSG00000030695	11674	A6ZI44;P05064;D3YWI1;D3Z510;A0A0U1RPN8;Q9CPQ9;A6ZI46;D3YV98;A0A0U1RPT5;A6ZI47	A6ZI44;P05064;D3YWI1;D3Z510;A0A0U1RPN8;Q9CPQ9;A6ZI46;D3YV98;A0A0U1RPT5;A6ZI47	12;12;9;8;8;8;8;7;7;6	12;12;9;8;8;8;8;7;7;6	11;11;8;8;8;8;8;7;7;6	Fructose-bisphosphate aldolase;Fructose-bisphosphate aldolase A	Aldoa;Aldoart1;Aldoart2	tr|A6ZI44|A6ZI44_MOUSE Fructose-bisphosphate aldolase OS=Mus musculus OX=10090 GN=Aldoa PE=1 SV=1;sp|P05064|ALDOA_MOUSE Fructose-bisphosphate aldolase A OS=Mus musculus OX=10090 GN=Aldoa PE=1 SV=2;tr|D3YWI1|D3YWI1_MOUSE Fructose-bisphosphate aldolase (Frag	10	12	12	11	3	10	5	2	1	2	2	2	3	3	10	5	2	1	2	2	2	3	2	9	4	1	1	2	1	2	2	35.9	35.9	29.4	45.12	418	418;364;236;180;190;364;419;193;209;364	0	179.36
A8DUK4	ENSMUSG00000073940	101488143	A8DUK4;P02089;P02088;E9Q223;CON__Q3SX09;CON__P02070;P02104	A8DUK4;P02089;P02088;E9Q223	6;5;5;4;2;1;1	6;5;5;4;2;1;1	6;5;5;4;2;1;1	Hemoglobin subunit beta-2;Hemoglobin subunit beta-1	Hbbt1;Hbb-b2;Hbb-b1;Hbb-bs	tr|A8DUK4|A8DUK4_MOUSE Beta-globin OS=Mus musculus OX=10090 GN=Hbb-bs PE=1 SV=1;sp|P02089|HBB2_MOUSE Hemoglobin subunit beta-2 OS=Mus musculus OX=10090 GN=Hbb-b2 PE=1 SV=2;sp|P02088|HBB1_MOUSE Hemoglobin subunit beta-1 OS=Mus musculus OX=10090 GN=Hbb-b1 PE	7	6	6	6	4	3	3	4	0	1	5	3	4	4	3	3	4	0	1	5	3	4	4	3	3	4	0	1	5	3	4	44.2	44.2	44.2	15.748	147	147;147;147;103;201;145;147	0	18.57
A8Y5G7	ENSMUSG00000020471	18972	A8Y5G7;O35654	A8Y5G7;O35654	2;2	2;2	2;2	DNA polymerase delta subunit 2	Pold2	tr|A8Y5G7|A8Y5G7_MOUSE DNA polymerase delta subunit 2 (Fragment) OS=Mus musculus OX=10090 GN=Pold2 PE=1 SV=1;sp|O35654|DPOD2_MOUSE DNA polymerase delta subunit 2 OS=Mus musculus OX=10090 GN=Pold2 PE=1 SV=2	2	2	2	2	1	0	0	0	0	1	0	0	0	1	0	0	0	0	1	0	0	0	1	0	0	0	0	1	0	0	0	12.4	12.4	12.4	26.355	241	241;469	0.0032383	2.8493
G5E8D1	ENSMUSG00000054215	20765	G5E8D1;A9JTY7;O70562;O70558;O70555;O70554;O70559	G5E8D1;A9JTY7;O70562;O70558;O70555;O70554;O70559	1;1;1;1;1;1;1	1;1;1;1;1;1;1	1;1;1;1;1;1;1	Small proline-rich protein 2K;Small proline-rich protein 2G;Small proline-rich protein 2D;Small proline-rich protein 2B;Small proline-rich protein 2H	Sprr2k;Sprr2b;Sprr2g;Sprr2d;Sprr2h	tr|G5E8D1|G5E8D1_MOUSE Small proline-rich protein 2K OS=Mus musculus OX=10090 GN=Sprr2k PE=3 SV=1;tr|A9JTY7|A9JTY7_MOUSE Small proline-rich protein 2B OS=Mus musculus OX=10090 GN=Sprr2b PE=2 SV=1;sp|O70562|SPR2K_MOUSE Small proline-rich protein 2K OS=Mus m	7	1	1	1	1	1	1	0	0	1	0	1	0	1	1	1	0	0	1	0	1	0	1	1	1	0	0	1	0	1	0	13.2	13.2	13.2	7.559	68	68;98;68;76;85;98;108	0.0013841	3.5534
B0QZN5	ENSMUSG00000020894	22318	B0QZN5;P63024;P63044	B0QZN5;P63024;P63044	1;1;1	1;1;1	1;1;1	Vesicle-associated membrane protein 3;Vesicle-associated membrane protein 2	Vamp2;Vamp3	tr|B0QZN5|B0QZN5_MOUSE Synaptobrevin-2 OS=Mus musculus OX=10090 GN=Vamp2 PE=1 SV=1;sp|P63024|VAMP3_MOUSE Vesicle-associated membrane protein 3 OS=Mus musculus OX=10090 GN=Vamp3 PE=1 SV=1;sp|P63044|VAMP2_MOUSE Vesicle-associated membrane protein 2 OS=Mus mu	3	1	1	1	0	1	0	0	0	0	0	0	0	0	1	0	0	0	0	0	0	0	0	1	0	0	0	0	0	0	0	10.4	10.4	10.4	17.862	163	163;103;116	0.0020175	3.1832
B1AQ75	ENSMUSG00000020916	16673	B1AQ75;CON__A2VCT4;Q6IFX4	B1AQ75	12;1;1	5;0;0	4;0;0	Keratin, type I cuticular Ha6	Krt36	sp|B1AQ75|KRT36_MOUSE Keratin, type I cuticular Ha6 OS=Mus musculus OX=10090 GN=Krt36 PE=1 SV=1	3	12	5	4	3	8	4	8	4	1	2	9	1	1	3	2	2	0	0	0	3	0	1	3	2	2	0	0	0	2	0	27.5	12.1	9.7	52.79	473	473;482;482	0	23.922
B1AQJ2	ENSMUSG00000033909	72344	B1AQJ2;B0QZF8	B1AQJ2;B0QZF8	17;13	17;13	17;13	Ubiquitin carboxyl-terminal hydrolase 36	Usp36	sp|B1AQJ2|UBP36_MOUSE Ubiquitin carboxyl-terminal hydrolase 36 OS=Mus musculus OX=10090 GN=Usp36 PE=1 SV=1;tr|B0QZF8|B0QZF8_MOUSE Ubiquitin carboxyl-terminal hydrolase 36 (Fragment) OS=Mus musculus OX=10090 GN=Usp36 PE=1 SV=1	2	17	17	17	9	5	6	12	13	4	7	8	10	9	5	6	12	13	4	7	8	10	9	5	6	12	13	4	7	8	10	22.3	22.3	22.3	119.91	1098	1098;890	0	57.919
B1AR51	ENSMUSG00000056752	237806	B1AR51	B1AR51	1	1	1	dynein, axonemal, heavy chain 9	Dnah9	tr|B1AR51|B1AR51_MOUSE Dynein, axonemal, heavy chain 9 OS=Mus musculus OX=10090 GN=Dnah9 PE=1 SV=1	1	1	1	1	0	1	0	0	0	0	0	0	0	0	1	0	0	0	0	0	0	0	0	1	0	0	0	0	0	0	0	0.3	0.3	0.3	512.36	4484	4484	1	-2
B1AR69	ENSMUSG00000060180	544791	B1AR69;M0QWL0;A0A2I3BPY4	B1AR69	27;3;1	1;0;0	1;0;0	myosin, heavy polypeptide 13, skeletal muscle	Myh13	tr|B1AR69|B1AR69_MOUSE Myosin, heavy polypeptide 13, skeletal muscle OS=Mus musculus OX=10090 GN=Myh13 PE=1 SV=1	3	27	1	1	22	0	0	0	0	0	0	15	0	0	0	0	0	0	0	0	1	0	0	0	0	0	0	0	0	1	0	14.9	1.2	1.2	223.56	1938	1938;223;162	1	-2
E9QA63	ENSMUSG00000028649	11426	E9QA63;B1ARU4;E9PVY8;Q9QXZ0;F6Q750;A0A571BGC6;A0A571BF93;A0A0A0MQA6;F7ACR9;E9QNP1;Q9QXZ0-2;Q9QXZ0-4;A0A286YD76	E9QA63;B1ARU4;E9PVY8;Q9QXZ0;F6Q750;A0A571BGC6;A0A571BF93;A0A0A0MQA6;F7ACR9;E9QNP1;Q9QXZ0-2;Q9QXZ0-4	4;4;4;4;3;3;3;3;3;3;3;3;1	4;4;4;4;3;3;3;3;3;3;3;3;1	1;1;1;1;0;0;0;0;0;0;0;0;0	Microtubule-actin cross-linking factor 1	Macf1	tr|E9QA63|E9QA63_MOUSE Microtubule-actin cross-linking factor 1 OS=Mus musculus OX=10090 GN=Macf1 PE=1 SV=2;tr|B1ARU4|B1ARU4_MOUSE Microtubule-actin cross-linking factor 1 OS=Mus musculus OX=10090 GN=Macf1 PE=1 SV=1;tr|E9PVY8|E9PVY8_MOUSE Microtubule-actin	13	4	4	1	0	4	0	0	0	0	0	0	0	0	4	0	0	0	0	0	0	0	0	1	0	0	0	0	0	0	0	0.6	0.6	0.1	831.93	7351	7351;7353;7355;7354;4429;5309;5323;5328;5333;5478;5327;5478;1358	0	8.7472
B1AV77	ENSMUSG00000010025	11671	B1AV77;B1ATI0;P47740;P47739	B1AV77;B1ATI0;P47740;P47739	2;2;2;1	2;2;2;1	2;2;2;1	Aldehyde dehydrogenase;Fatty aldehyde dehydrogenase;Aldehyde dehydrogenase, dimeric NADP-preferring	Aldh3a2;Aldh3a1	tr|B1AV77|B1AV77_MOUSE Aldehyde dehydrogenase OS=Mus musculus OX=10090 GN=Aldh3a2 PE=1 SV=1;tr|B1ATI0|B1ATI0_MOUSE Aldehyde dehydrogenase OS=Mus musculus OX=10090 GN=Aldh3a2 PE=1 SV=1;sp|P47740|AL3A2_MOUSE Aldehyde dehydrogenase family 3 member A2 OS=Mus m	4	2	2	2	0	2	0	0	0	0	0	0	0	0	2	0	0	0	0	0	0	0	0	2	0	0	0	0	0	0	0	4.1	4.1	4.1	54.33	487	487;532;484;453	0.0014276	4.0131
B1AU25	ENSMUSG00000036932	26926	B1AU25;Q9Z0X1-2;Q9Z0X1	B1AU25;Q9Z0X1-2;Q9Z0X1	2;1;1	2;1;1	2;1;1	Apoptosis-inducing factor 1, mitochondrial	Aifm1	tr|B1AU25|B1AU25_MOUSE Apoptosis-inducing factor 1, mitochondrial OS=Mus musculus OX=10090 GN=Aifm1 PE=1 SV=1;sp|Q9Z0X1-2|AIFM1_MOUSE Isoform 2 of Apoptosis-inducing factor 1, mitochondrial OS=Mus musculus OX=10090 GN=Aifm1;sp|Q9Z0X1|AIFM1_MOUSE Apoptosis-	3	2	2	2	0	0	0	0	0	1	0	0	1	0	0	0	0	0	1	0	0	1	0	0	0	0	0	1	0	0	1	6.4	6.4	6.4	66.113	608	608;324;612	0.0014055	3.7326
B1AU75	ENSMUSG00000028693	50927	B1AU75;Q99MD9;B1AU76;Q99MD9-2	B1AU75;Q99MD9	5;4;2;2	5;4;2;2	5;4;2;2	Nuclear autoantigenic sperm protein	Nasp	tr|B1AU75|B1AU75_MOUSE Nuclear autoantigenic sperm protein OS=Mus musculus OX=10090 GN=Nasp PE=1 SV=1;sp|Q99MD9|NASP_MOUSE Nuclear autoantigenic sperm protein OS=Mus musculus OX=10090 GN=Nasp PE=1 SV=2	4	5	5	5	0	0	3	3	0	1	0	1	3	0	0	3	3	0	1	0	1	3	0	0	3	3	0	1	0	1	3	8.2	8.2	8.2	84.012	773	773;773;448;421	0	10.872
B1AV09	ENSMUSG00000079387	434865	B1AV09	B1AV09	11	1	0	leucine zipper protein 4	Luzp4	tr|B1AV09|B1AV09_MOUSE Leucine zipper protein 4 OS=Mus musculus OX=10090 GN=Luzp4 PE=4 SV=1	1	11	1	0	11	8	9	8	8	9	9	8	11	1	1	1	1	1	1	1	1	1	0	0	0	0	0	0	0	0	0	26.7	3.6	0	52.903	449	449	0.0014075	3.7533
B1AVB1	ENSMUSG00000000037	107815	B1AVB1	B1AVB1	30	30	0	Scm polycomb group protein like 2	Scml2	tr|B1AVB1|B1AVB1_MOUSE Scm polycomb group protein-like 2 OS=Mus musculus OX=10090 GN=Scml2 PE=1 SV=1	1	30	30	0	29	26	25	29	28	25	26	28	28	29	26	25	29	28	25	26	28	28	0	0	0	0	0	0	0	0	0	54.8	54.8	0	89.52	825	825	0	323.31
B1AVB2	ENSMUSG00000000037	107815	B1AVB2	B1AVB2	30	1	1	Scm polycomb group protein like 2	Scml2	tr|B1AVB2|B1AVB2_MOUSE Scm polycomb group protein-like 2 OS=Mus musculus OX=10090 GN=Scml2 PE=1 SV=1	1	30	1	1	29	26	25	29	28	25	26	28	28	1	1	1	1	1	1	1	1	1	1	1	1	1	1	1	1	1	1	57.6	2.2	2.2	90.153	827	827	0	38.078
B1AVB3	ENSMUSG00000000037	107815	B1AVB3;A0A571BGE2	B1AVB3	30;3	4;2	3;2	Scm polycomb group protein like 2	Scml2	tr|B1AVB3|B1AVB3_MOUSE Scm polycomb group protein-like 2 OS=Mus musculus OX=10090 GN=Scml2 PE=1 SV=1	2	30	4	3	26	24	22	27	26	24	24	28	26	1	2	1	2	2	2	1	4	2	0	1	0	1	1	1	0	3	1	56.1	8.4	5.9	106.72	969	969;130	0	23.627
L7N236	ENSMUSG00000096834	434866	L7N236;B1AZM2;B1AVZ5;E9Q1L3;A2AJU2	L7N236;B1AZM2;B1AVZ5;E9Q1L3;A2AJU2	11;11;11;10;9	1;1;1;1;1	1;1;1;1;1	predicted gene 15127	Gm15127;Gm15091;Gm10439	tr|L7N236|L7N236_MOUSE Predicted gene 15127 OS=Mus musculus OX=10090 GN=Gm15127 PE=4 SV=1;tr|B1AZM2|B1AZM2_MOUSE Predicted gene 15091 OS=Mus musculus OX=10090 GN=Gm15091 PE=1 SV=1;tr|B1AVZ5|B1AVZ5_MOUSE Predicted gene 15127 OS=Mus musculus OX=10090 GN=Gm15	5	11	1	1	11	8	9	8	8	9	9	8	11	1	1	1	1	1	1	1	1	1	1	1	1	1	1	1	1	1	1	27.7	3.7	3.7	50.972	433	433;449;449;449;433	0.001444	4.1678
B1AWE0	ENSMUSG00000028478	12757	B1AWE0;Q6PFA2;B1AWE1;B1AWD8;B1AWD9;O08585	B1AWE0;Q6PFA2;B1AWE1;B1AWD8;B1AWD9;O08585	1;1;1;1;1;1	1;1;1;1;1;1	1;1;1;1;1;1	Clathrin light chain A	Clta	tr|B1AWE0|B1AWE0_MOUSE Clathrin light chain OS=Mus musculus OX=10090 GN=Clta PE=1 SV=1;tr|Q6PFA2|Q6PFA2_MOUSE Clathrin light chain OS=Mus musculus OX=10090 GN=Clta PE=1 SV=1;tr|B1AWE1|B1AWE1_MOUSE Clathrin light chain OS=Mus musculus OX=10090 GN=Clta PE=1	6	1	1	1	0	1	0	0	0	0	0	0	0	0	1	0	0	0	0	0	0	0	0	1	0	0	0	0	0	0	0	4.2	4.2	4.2	23.478	216	216;218;230;236;248;235	0.008642	2.4986
B1AWT2	ENSMUSG00000028278	52187	B1AWT2;B1AWT3;Q7TT45	B1AWT2;B1AWT3;Q7TT45	1;1;1	1;1;1	1;1;1	Ras-related GTP-binding protein D	Rragd	tr|B1AWT2|B1AWT2_MOUSE Ras-related GTP-binding protein OS=Mus musculus OX=10090 GN=Rragd PE=1 SV=1;tr|B1AWT3|B1AWT3_MOUSE Ras-related GTP-binding protein OS=Mus musculus OX=10090 GN=Rragd PE=1 SV=1;sp|Q7TT45|RRAGD_MOUSE Ras-related GTP-binding protein D OS	3	1	1	1	0	0	0	0	0	0	0	1	0	0	0	0	0	0	0	0	1	0	0	0	0	0	0	0	0	1	0	3.5	3.5	3.5	45.145	399	399;454;449	0.0069052	2.6051
B1AX39	ENSMUSG00000035649	319885	B1AX39;E9Q193;E0CY20;B1AX39-3	B1AX39	5;2;2;1	5;2;2;1	5;2;2;1	Zinc finger CCHC domain-containing protein 7	Zcchc7	sp|B1AX39|ZCHC7_MOUSE Zinc finger CCHC domain-containing protein 7 OS=Mus musculus OX=10090 GN=Zcchc7 PE=2 SV=1	4	5	5	5	2	0	1	2	3	2	1	1	2	2	0	1	2	3	2	1	1	2	2	0	1	2	3	2	1	1	2	9.2	9.2	9.2	63	541	541;118;261;220	0	10.42
Q80Y51	ENSMUSG00000008489	15569	Q80Y51;B1AXZ0;Q80UJ0;B1AXZ5;Q60899;B1AXZ4;Q3UR02;B1AXZ6;Q61701-4;Q61701-9;Q61701;Q61701-7;Q61701-10;Q61701-5;Q61701-2;Q61701-6;Q61701-11;H3BLG7;A2A9R4;Q61701-8;A2A9R5;Q60900;Q60900-2;A0A1L1SS95	Q80Y51;B1AXZ0;Q80UJ0;B1AXZ5;Q60899;B1AXZ4;Q3UR02;B1AXZ6;Q61701-4;Q61701-9;Q61701;Q61701-7;Q61701-10;Q61701-5;Q61701-2;Q61701-6;Q61701-11	8;8;8;8;8;8;8;8;4;4;4;4;4;4;4;4;4;2;2;1;1;1;1;1	8;8;8;8;8;8;8;8;4;4;4;4;4;4;4;4;4;2;2;1;1;1;1;1	8;8;8;8;8;8;8;8;4;4;4;4;4;4;4;4;4;2;2;1;1;1;1;1	ELAV-like protein;ELAV-like protein 2;ELAV-like protein 4	Elavl2;Elavl4	tr|Q80Y51|Q80Y51_MOUSE ELAV-like protein OS=Mus musculus OX=10090 GN=Elavl2 PE=1 SV=1;tr|B1AXZ0|B1AXZ0_MOUSE ELAV-like protein OS=Mus musculus OX=10090 GN=Elavl2 PE=1 SV=1;tr|Q80UJ0|Q80UJ0_MOUSE ELAV-like protein OS=Mus musculus OX=10090 GN=Elavl2 PE=1 SV=	24	8	8	8	5	2	6	4	3	6	2	3	5	5	2	6	4	3	6	2	3	5	5	2	6	4	3	6	2	3	5	28.4	28.4	28.4	41.022	373	373;346;347;389;360;388;359;376;380;383;385;366;371;366;358;356;390;125;137;92;94;367;360;250	0	36.396
B1AZ46	ENSMUSG00000025372	108100	B1AZ46;Q8BKX1-4;Q8BKX1-3;Q8BKX1-2;Q8BKX1	B1AZ46;Q8BKX1-4;Q8BKX1-3;Q8BKX1-2;Q8BKX1	1;1;1;1;1	1;1;1;1;1	1;1;1;1;1	Brain-specific angiogenesis inhibitor 1-associated protein 2	Baiap2	tr|B1AZ46|B1AZ46_MOUSE Brain-specific angiogenesis inhibitor 1-associated protein 2 OS=Mus musculus OX=10090 GN=Baiap2 PE=1 SV=1;sp|Q8BKX1-4|BAIP2_MOUSE Isoform 4 of Brain-specific angiogenesis inhibitor 1-associated protein 2 OS=Mus musculus OX=10090 GN=B	5	1	1	1	0	1	0	0	0	0	0	0	0	0	1	0	0	0	0	0	0	0	0	1	0	0	0	0	0	0	0	2.3	2.3	2.3	57.681	521	521;482;513;522;535	0.0020121	3.1539
E9PZ16	ENSMUSG00000028763	15530	E9PZ16;B1B0C7;Q05793	E9PZ16;B1B0C7;Q05793	2;2;2	2;2;2	2;2;2	Basement membrane-specific heparan sulfate proteoglycan core protein;Endorepellin;LG3 peptide	Hspg2	tr|E9PZ16|E9PZ16_MOUSE Basement membrane-specific heparan sulfate proteoglycan core protein OS=Mus musculus OX=10090 GN=Hspg2 PE=1 SV=1;tr|B1B0C7|B1B0C7_MOUSE Basement membrane-specific heparan sulfate proteoglycan core protein OS=Mus musculus OX=10090 GN=	3	2	2	2	2	1	1	1	0	2	0	0	0	2	1	1	1	0	2	0	0	0	2	1	1	1	0	2	0	0	0	0.6	0.6	0.6	469.78	4383	4383;4375;3707	0	5.6327
B1B0S0	ENSMUSG00000058147	22446	B1B0S0;Q6P205;Q61806;Q60595;Q99L59	B1B0S0;Q6P205;Q61806;Q60595	4;4;4;2;1	4;4;4;2;1	4;4;4;2;1	X-linked lymphocyte-regulated protein 3B;X-linked lymphocyte-regulated protein 3C;X-linked lymphocyte-regulated protein 3A	Xlr3c;Xlr3b;Xlr3a	tr|B1B0S0|B1B0S0_MOUSE X-linked lymphocyte-regulated protein 3C OS=Mus musculus OX=10090 GN=Xlr3c PE=3 SV=1;sp|Q6P205|XL3B_MOUSE X-linked lymphocyte-regulated protein 3B OS=Mus musculus OX=10090 GN=Xlr3b PE=2 SV=1;sp|Q61806|XL3C_MOUSE X-linked lymphocyte-r	5	4	4	4	0	0	0	2	1	3	0	0	0	0	0	0	2	1	3	0	0	0	0	0	0	2	1	3	0	0	0	24.3	24.3	24.3	26.178	226	226;226;226;226;221	0	7.3745
B1B0V2	ENSMUSG00000073294	102991	B1B0V2;B1B0V2-2	B1B0V2;B1B0V2-2	7;6	7;6	7;6	EZH inhibitory protein	AU022751	sp|B1B0V2|EZHIP_MOUSE EZH inhibitory protein OS=Mus musculus OX=10090 GN=Ezhip PE=1 SV=1;sp|B1B0V2-2|EZHIP_MOUSE Isoform 2 of EZH inhibitory protein OS=Mus musculus OX=10090 GN=Ezhip	2	7	7	7	4	4	4	5	5	4	4	3	4	4	4	4	5	5	4	4	3	4	4	4	4	5	5	4	4	3	4	17.7	17.7	17.7	61.797	589	589;468	0	33.871
B1B1A8	ENSMUSG00000022836	107589	B1B1A8;Q6PDN3-2;Q6PDN3-3;Q6PDN3	B1B1A8;Q6PDN3-2;Q6PDN3-3;Q6PDN3	1;1;1;1	1;1;1;1	1;1;1;1	Myosin light chain kinase, smooth muscle;Myosin light chain kinase, smooth muscle, deglutamylated form	Mylk	tr|B1B1A8|B1B1A8_MOUSE Myosin light chain kinase, smooth muscle OS=Mus musculus OX=10090 GN=Mylk PE=1 SV=1;sp|Q6PDN3-2|MYLK_MOUSE Isoform 2 of Myosin light chain kinase, smooth muscle OS=Mus musculus OX=10090 GN=Mylk;sp|Q6PDN3-3|MYLK_MOUSE Isoform 3 of Myo	4	1	1	1	0	1	0	0	0	0	0	0	0	0	1	0	0	0	0	0	0	0	0	1	0	0	0	0	0	0	0	0.4	0.4	0.4	213.61	1950	1950;687;1031;1941	0.0051086	2.7198
Q9D773	ENSMUSG00000002767	27398	Q9D773;B1B1D8;B1B1D7	Q9D773;B1B1D8	5;5;2	5;5;2	5;5;2	39S ribosomal protein L2, mitochondrial	Mrpl2	sp|Q9D773|RM02_MOUSE 39S ribosomal protein L2, mitochondrial OS=Mus musculus OX=10090 GN=Mrpl2 PE=1 SV=1;tr|B1B1D8|B1B1D8_MOUSE 39S ribosomal protein L2, mitochondrial OS=Mus musculus OX=10090 GN=Mrpl2 PE=1 SV=1	3	5	5	5	4	1	4	1	0	0	0	0	0	4	1	4	1	0	0	0	0	0	4	1	4	1	0	0	0	0	0	26.8	26.8	26.8	33.34	306	306;304;247	0	25.58
E9QAI5	ENSMUSG00000013629	69719	E9QAI5;B2RQC6;G3UWN2;B2RQC6-2;E9QAT6;F6S3Z3;Q8C196	E9QAI5;B2RQC6;G3UWN2;B2RQC6-2	53;53;52;52;25;5;1	53;53;52;52;25;5;1	53;53;52;52;25;5;1	CAD protein;Glutamine-dependent carbamoyl-phosphate synthase;Aspartate carbamoyltransferase;Dihydroorotase	Cad	tr|E9QAI5|E9QAI5_MOUSE Aspartate carbamoyltransferase OS=Mus musculus OX=10090 GN=Cad PE=1 SV=1;sp|B2RQC6|PYR1_MOUSE CAD protein OS=Mus musculus OX=10090 GN=Cad PE=1 SV=1;tr|G3UWN2|G3UWN2_MOUSE CAD protein OS=Mus musculus OX=10090 GN=Cad PE=1 SV=1;sp|B2RQC	7	53	53	53	34	27	34	33	22	29	35	33	39	34	27	34	33	22	29	35	33	39	34	27	34	33	22	29	35	33	39	34.1	34.1	34.1	236.25	2162	2162;2225;2164;2154;971;194;1500	0	323.31
B2RR83	ENSMUSG00000034653	240255	B2RR83;A0A0J9YV44	B2RR83	15;6	15;6	15;6	Probable ATP-dependent RNA helicase YTHDC2	Ythdc2	sp|B2RR83|YTDC2_MOUSE 3-5 RNA helicase YTHDC2 OS=Mus musculus OX=10090 GN=Ythdc2 PE=1 SV=1	2	15	15	15	3	3	4	3	8	7	6	7	5	3	3	4	3	8	7	6	7	5	3	3	4	3	8	7	6	7	5	12.7	12.7	12.7	161.09	1445	1445;585	0	39.262
B2RRF6	ENSMUSG00000049164	72672	B2RRF6	B2RRF6	1	1	1	Zinc finger protein 518A	Znf518a	sp|B2RRF6|Z518A_MOUSE Zinc finger protein 518A OS=Mus musculus OX=10090 GN=Znf518a PE=2 SV=1	1	1	1	1	0	0	0	1	1	0	1	0	1	0	0	0	1	1	0	1	0	1	0	0	0	1	1	0	1	0	1	1.3	1.3	1.3	165.6	1478	1478	0	4.4846
F7CVW0	ENSMUSG00000038095	243272	F7CVW0;B2RRI2;Q689Z5;Q689Z5-2;Q3TMM7;A0A0G2JGC7;A0A0G2JEM3;A0A1W2P6Y8;A0A1W2P7W8;Q7TNB8-3;Q7TNB8-2;Q7TNB8	F7CVW0;B2RRI2;Q689Z5;Q689Z5-2;Q3TMM7;A0A0G2JGC7;A0A0G2JEM3	6;6;6;6;5;5;5;1;1;1;1;1	6;6;6;6;5;5;5;1;1;1;1;1	6;6;6;6;5;5;5;1;1;1;1;1	Protein strawberry notch homolog 1	Sbno1	tr|F7CVW0|F7CVW0_MOUSE Protein strawberry notch homolog 1 (Fragment) OS=Mus musculus OX=10090 GN=Sbno1 PE=1 SV=1;tr|B2RRI2|B2RRI2_MOUSE Protein strawberry notch homolog 1 OS=Mus musculus OX=10090 GN=Sbno1 PE=1 SV=1;sp|Q689Z5|SBNO1_MOUSE Protein strawberry	12	6	6	6	2	0	1	1	1	2	2	2	3	2	0	1	1	1	2	2	2	3	2	0	1	1	1	2	2	2	3	5.8	5.8	5.8	153.79	1390	1390;1391;1390;1391;663;755;785;736;1230;655;1348;1349	0	19.033
B2RUF0	ENSMUSG00000018554	53422	B2RUF0;A0A0A0MQD2;Q9Z2C8;Q9Z2C8-2;J3QNB9	B2RUF0;A0A0A0MQD2;Q9Z2C8;Q9Z2C8-2	8;6;6;5;2	5;3;3;2;2	5;3;3;2;2	Y-box-binding protein 2	Ybx2	tr|B2RUF0|B2RUF0_MOUSE Y box protein 2 OS=Mus musculus OX=10090 GN=Ybx2 PE=1 SV=1;tr|A0A0A0MQD2|A0A0A0MQD2_MOUSE Y-box-binding protein 2 OS=Mus musculus OX=10090 GN=Ybx2 PE=1 SV=1;sp|Q9Z2C8|YBOX2_MOUSE Y-box-binding protein 2 OS=Mus musculus OX=10090 GN=Yb	5	8	5	5	8	4	8	7	7	7	6	7	7	5	2	5	4	5	4	3	4	4	5	2	5	4	5	4	3	4	4	36.5	26.5	26.5	38.08	359	359;282;360;282;164	0	119.19
J3QK27	ENSMUSG00000094511	100862383	J3QK27;B2RWR6;Q60990;O35698;A0A087WR82;A0A087WPY7	J3QK27;B2RWR6;Q60990;O35698;A0A087WR82	18;18;18;18;17;6	18;18;18;18;17;6	18;18;18;18;17;6	RNA-binding motif protein, Y chromosome, family 1 member B;RNA-binding motif protein, Y chromosome, family 1 member A1	Gm21693;Rbmy1a1;Rbmy1b;Gm4064	tr|J3QK27|J3QK27_MOUSE Predicted gene, 21693 OS=Mus musculus OX=10090 GN=Gm21693 PE=4 SV=1;tr|B2RWR6|B2RWR6_MOUSE Predicted gene 10256 OS=Mus musculus OX=10090 GN=Gm10352 PE=2 SV=1;sp|Q60990|RBY1B_MOUSE RNA-binding motif protein, Y chromosome, family 1 mem	6	18	18	18	18	16	18	17	16	13	14	17	16	18	16	18	17	16	13	14	17	16	18	16	18	17	16	13	14	17	16	44.7	44.7	44.7	43.241	380	380;380;380;380;380;166	0	277.03
B2RY56	ENSMUSG00000010608	67039	B2RY56;S4R2B0;S4R2J1;S4R2A4;S4R1X9;S4R2F7	B2RY56;S4R2B0	11;8;2;2;1;1	11;8;2;2;1;1	11;8;2;2;1;1	RNA-binding protein 25	Rbm25	sp|B2RY56|RBM25_MOUSE RNA-binding protein 25 OS=Mus musculus OX=10090 GN=Rbm25 PE=1 SV=2;tr|S4R2B0|S4R2B0_MOUSE RNA-binding protein 25 (Fragment) OS=Mus musculus OX=10090 GN=Rbm25 PE=1 SV=1	6	11	11	11	8	4	6	4	6	7	4	5	5	8	4	6	4	6	7	4	5	5	8	4	6	4	6	7	4	5	5	16.9	16.9	16.9	99.551	838	838;585;174;194;163;194	0	27.978
B2ZAC8	ENSMUSG00000001472	66855	B2ZAC8;Q8R3L2;A0A1D5RM90;Q8R3L2-4;Q8R3L2-3;Q8R3L2-2;Q8R3L2-5;A0A1D5RLU0	B2ZAC8;Q8R3L2;A0A1D5RM90;Q8R3L2-4;Q8R3L2-3;Q8R3L2-2;Q8R3L2-5	3;3;2;2;2;2;2;1	3;3;2;2;2;2;2;1	3;3;2;2;2;2;2;1	Transcription factor 25	Tcf25	tr|B2ZAC8|B2ZAC8_MOUSE Nuclear localized protein-1 isoform d (Fragment) OS=Mus musculus OX=10090 GN=Tcf25 PE=1 SV=1;sp|Q8R3L2|TCF25_MOUSE Transcription factor 25 OS=Mus musculus OX=10090 GN=Tcf25 PE=1 SV=2;tr|A0A1D5RM90|A0A1D5RM90_MOUSE Transcription facto	8	3	3	3	0	0	1	0	0	0	0	1	1	0	0	1	0	0	0	0	1	1	0	0	1	0	0	0	0	1	1	4.3	4.3	4.3	73.951	651	651;676;626;600;611;625;626;110	0	4.4903
B7FAV1	ENSMUSG00000031328	192176	B7FAV1;B7FAU9;Q8BTM8;F6XC15;Q8BTM8-2;Q8VHX6-2;Q8VHX6;J3JS91	B7FAV1;B7FAU9;Q8BTM8	17;17;17;5;4;3;3;2	14;14;14;2;2;0;0;2	14;14;14;2;2;0;0;2	Filamin-A	Flna	tr|B7FAV1|B7FAV1_MOUSE Filamin, alpha (Fragment) OS=Mus musculus OX=10090 GN=Flna PE=1 SV=1;tr|B7FAU9|B7FAU9_MOUSE Filamin, alpha OS=Mus musculus OX=10090 GN=Flna PE=1 SV=1;sp|Q8BTM8|FLNA_MOUSE Filamin-A OS=Mus musculus OX=10090 GN=Flna PE=1 SV=5	8	17	14	14	0	17	0	0	0	0	0	0	0	0	14	0	0	0	0	0	0	0	0	14	0	0	0	0	0	0	0	9.3	8.2	8.2	274.63	2583	2583;2639;2647;511;249;2693;2726;277	0	42.358
B7ZBY7	ENSMUSG00000078923	66589	B7ZBY7;E9PY39;Q9CZY3;B7ZBY6;Q9D2M8-2;Q9CZY3-2;Q9D2M8;B2KF55;A6X925	B7ZBY7;E9PY39;Q9CZY3;B7ZBY6;Q9D2M8-2;Q9CZY3-2;Q9D2M8	3;3;3;2;2;2;2;1;1	3;3;3;2;2;2;2;1;1	3;3;3;2;2;2;2;1;1	Ubiquitin-conjugating enzyme E2 variant 1;Ubiquitin-conjugating enzyme E2 variant 2	Ube2v1;Gm20431;Ube2v2	tr|B7ZBY7|B7ZBY7_MOUSE Ubiquitin-conjugating enzyme E2 variant 1 OS=Mus musculus OX=10090 GN=Ube2v1 PE=4 SV=1;tr|E9PY39|E9PY39_MOUSE Predicted gene 20431 OS=Mus musculus OX=10090 GN=Gm20431 PE=3 SV=1;sp|Q9CZY3|UB2V1_MOUSE Ubiquitin-conjugating enzyme E2 va	9	3	3	3	0	2	1	0	1	1	0	1	0	0	2	1	0	1	1	0	1	0	0	2	1	0	1	1	0	1	0	20.8	20.8	20.8	19.339	173	173;371;147;124;103;105;145;63;105	0	6.4663
B7ZCU2	ENSMUSG00000058835	11308	B7ZCU2;B7ZCU5;B7ZCU4;B7ZCU3;B7ZCU0;J3QNK8;Q8CBW3-5;Q8CBW3-2;Q8CBW3-4;Q8CBW3-3;Q8CBW3	B7ZCU2;B7ZCU5;B7ZCU4;B7ZCU3;B7ZCU0;J3QNK8;Q8CBW3-5;Q8CBW3-2;Q8CBW3-4;Q8CBW3-3;Q8CBW3	1;1;1;1;1;1;1;1;1;1;1	1;1;1;1;1;1;1;1;1;1;1	1;1;1;1;1;1;1;1;1;1;1	Abl interactor 1	Abi1	tr|B7ZCU2|B7ZCU2_MOUSE Abl interactor 1 OS=Mus musculus OX=10090 GN=Abi1 PE=1 SV=1;tr|B7ZCU5|B7ZCU5_MOUSE Abl interactor 1 OS=Mus musculus OX=10090 GN=Abi1 PE=1 SV=1;tr|B7ZCU4|B7ZCU4_MOUSE Abl interactor 1 OS=Mus musculus OX=10090 GN=Abi1 PE=1 SV=1;tr|B7ZC	11	1	1	1	0	1	0	0	0	0	0	0	0	0	1	0	0	0	0	0	0	0	0	1	0	0	0	0	0	0	0	2.8	2.8	2.8	43.174	393	393;422;451;452;480;481;388;446;475;476;481	0.0091743	2.4342
Q65Z40	ENSMUSG00000041408	218914	Q65Z40;B7ZP47;F6YCH1	Q65Z40;B7ZP47	4;4;1	4;4;1	4;4;1	Wings apart-like protein homolog	Wapal	sp|Q65Z40|WAPL_MOUSE Wings apart-like protein homolog OS=Mus musculus OX=10090 GN=Wapl PE=1 SV=2;tr|B7ZP47|B7ZP47_MOUSE Wapal protein OS=Mus musculus OX=10090 GN=Wapl PE=1 SV=1	3	4	4	4	0	0	1	0	0	0	1	2	3	0	0	1	0	0	0	1	2	3	0	0	1	0	0	0	1	2	3	4.6	4.6	4.6	134.07	1200	1200;1194;430	0	7.4633
Q5SPA9	ENSMUSG00000028399	19266	Q5SPA9;E9Q7I7;B9EJA3;E9PVW8;G3UWK6;G3UY75;G3UX60;G3UYU6;Q64487-12;Q64487-3;Q64487-2;Q64487-1;Q64487-11;Q64487-9;Q64487-10;Q64487-7;Q64487-8;Q64487-5;Q64487-6;Q64487	Q5SPA9;E9Q7I7;B9EJA3;E9PVW8;G3UWK6;G3UY75;G3UX60;G3UYU6;Q64487-12;Q64487-3;Q64487-2;Q64487-1;Q64487-11;Q64487-9;Q64487-10;Q64487-7;Q64487-8;Q64487-5;Q64487-6;Q64487	1;1;1;1;1;1;1;1;1;1;1;1;1;1;1;1;1;1;1;1	1;1;1;1;1;1;1;1;1;1;1;1;1;1;1;1;1;1;1;1	1;1;1;1;1;1;1;1;1;1;1;1;1;1;1;1;1;1;1;1	Protein-tyrosine-phosphatase;Receptor-type tyrosine-protein phosphatase delta	Ptprd	tr|Q5SPA9|Q5SPA9_MOUSE Protein-tyrosine-phosphatase OS=Mus musculus OX=10090 GN=Ptprd PE=1 SV=1;tr|E9Q7I7|E9Q7I7_MOUSE Protein-tyrosine-phosphatase OS=Mus musculus OX=10090 GN=Ptprd PE=1 SV=2;tr|B9EJA3|B9EJA3_MOUSE Protein-tyrosine-phosphatase OS=Mus muscu	20	1	1	1	0	0	0	0	0	1	0	0	1	0	0	0	0	0	1	0	0	1	0	0	0	0	0	1	0	0	1	1	1	1	141.64	1254	1254;1505;1508;1506;1505;1890;1502;1495;1501;1695;1293;1893;1899;1902;1903;1905;1906;1908;1909;1912	1	-2
C0HKD9	ENSMUSG00000048222	100034361	C0HKD9;C0HKD8	C0HKD9;C0HKD8	2;2	2;2	2;2	microfibrillar-associated protein 1B	Mfap1b	sp|C0HKD9|MFA1B_MOUSE Microfibrillar-associated protein 1B OS=Mus musculus OX=10090 GN=Mfap1b PE=1 SV=1;sp|C0HKD8|MFA1A_MOUSE Microfibrillar-associated protein 1A OS=Mus musculus OX=10090 GN=Mfap1a PE=1 SV=1	2	2	2	2	1	1	1	1	1	1	1	1	1	1	1	1	1	1	1	1	1	1	1	1	1	1	1	1	1	1	1	6.2	6.2	6.2	51.954	439	439;439	0	5.2085
D3YTQ3	ENSMUSG00000029328	50926	D3YTQ3;F6VQH5;Q9Z130	D3YTQ3;F6VQH5;Q9Z130	6;6;6	6;6;6	6;6;6	Heterogeneous nuclear ribonucleoprotein D-like	Hnrnpdl	tr|D3YTQ3|D3YTQ3_MOUSE Heterogeneous nuclear ribonucleoprotein D-like OS=Mus musculus OX=10090 GN=Hnrnpdl PE=1 SV=1;tr|F6VQH5|F6VQH5_MOUSE Heterogeneous nuclear ribonucleoprotein D-like (Fragment) OS=Mus musculus OX=10090 GN=Hnrnpdl PE=1 SV=1;sp|Q9Z130|HNR	3	6	6	6	6	3	5	6	4	3	5	5	5	6	3	5	6	4	3	5	5	5	6	3	5	6	4	3	5	5	5	16.7	16.7	16.7	46.27	420	420;323;301	0	49.28
D3YTR5	ENSMUSG00000035478	17192	D3YTR5;D3YTR4;Q9Z2D8-2;Q9Z2D8;F6WZH1	D3YTR5;D3YTR4;Q9Z2D8-2;Q9Z2D8;F6WZH1	5;5;5;5;4	5;5;5;5;4	5;5;5;5;4	Methyl-CpG-binding domain protein 3	Mbd3	tr|D3YTR5|D3YTR5_MOUSE Methyl-CpG-binding domain protein 3 OS=Mus musculus OX=10090 GN=Mbd3 PE=1 SV=1;tr|D3YTR4|D3YTR4_MOUSE Methyl-CpG-binding domain protein 3 OS=Mus musculus OX=10090 GN=Mbd3 PE=1 SV=1;sp|Q9Z2D8-2|MBD3_MOUSE Isoform 2 of Methyl-CpG-bindi	5	5	5	5	4	2	4	5	4	3	4	4	4	4	2	4	5	4	3	4	4	4	4	2	4	5	4	3	4	4	4	24.1	24.1	24.1	29.07	261	261;281;253;285;185	0	32.838
D3YU80	ENSMUSG00000045193	12696	D3YU80;K4DI65;P60824	D3YU80;K4DI65;P60824	2;2;2	2;2;2	2;2;2	Cold-inducible RNA-binding protein	Cirbp	tr|D3YU80|D3YU80_MOUSE Cold-inducible RNA-binding protein (Fragment) OS=Mus musculus OX=10090 GN=Cirbp PE=1 SV=1;tr|K4DI65|K4DI65_MOUSE Cold-inducible RNA-binding protein OS=Mus musculus OX=10090 GN=Cirbp PE=1 SV=1;sp|P60824|CIRBP_MOUSE Cold-inducible RNA-	3	2	2	2	2	0	2	2	1	1	2	2	2	2	0	2	2	1	1	2	2	2	2	0	2	2	1	1	2	2	2	23.1	23.1	23.1	11.782	108	108;168;172	0	5.7534
D3YWF5	ENSMUSG00000059820	270156	D3YWF5;D3Z5E5;D3YU88;E9PUQ3	D3YWF5;D3Z5E5;D3YU88;E9PUQ3	2;2;2;2	2;2;2;2	2;2;2;2	NKAP domain containing 1	AU019823	tr|D3YWF5|D3YWF5_MOUSE NKAP domain-containing 1 OS=Mus musculus OX=10090 GN=Nkapd1 PE=1 SV=1;tr|D3Z5E5|D3Z5E5_MOUSE NKAP domain-containing 1 (Fragment) OS=Mus musculus OX=10090 GN=Nkapd1 PE=1 SV=1;tr|D3YU88|D3YU88_MOUSE NKAP domain-containing 1 (Fragment)	4	2	2	2	0	0	0	0	0	2	0	0	0	0	0	0	0	0	2	0	0	0	0	0	0	0	0	2	0	0	0	19.2	19.2	19.2	14.995	125	125;203;214;292	0	5.4556
D3YUT3	ENSMUSG00000040952	20085	D3YUT3;D3YUG3;D3Z5R8;D3Z722;Q9CZX8;S4R223	D3YUT3;D3YUG3;D3Z5R8;D3Z722;Q9CZX8;S4R223	2;2;2;2;2;1	2;2;2;2;2;1	2;2;2;2;2;1	40S ribosomal protein S19	Rps19	tr|D3YUT3|D3YUT3_MOUSE 40S ribosomal protein S19 (Fragment) OS=Mus musculus OX=10090 GN=Rps19 PE=1 SV=2;tr|D3YUG3|D3YUG3_MOUSE 40S ribosomal protein S19 (Fragment) OS=Mus musculus OX=10090 GN=Rps19 PE=1 SV=8;tr|D3Z5R8|D3Z5R8_MOUSE 40S ribosomal protein S19	6	2	2	2	0	1	0	2	0	0	0	0	0	0	1	0	2	0	0	0	0	0	0	1	0	2	0	0	0	0	0	13.5	13.5	13.5	14.896	133	133;137;176;212;145;72	0.001442	4.1329
D3YUW8	ENSMUSG00000038902	229584	D3YUW8;D3YUX1;Q0VGT3;Q8BZH4	D3YUW8;D3YUX1;Q0VGT3;Q8BZH4	11;11;11;11	11;11;11;11	11;11;11;11	Pogo transposable element with ZNF domain	Pogz	tr|D3YUW8|D3YUW8_MOUSE Pogo transposable element with ZNF domain OS=Mus musculus OX=10090 GN=Pogz PE=1 SV=1;tr|D3YUX1|D3YUX1_MOUSE Pogo transposable element with ZNF domain OS=Mus musculus OX=10090 GN=Pogz PE=1 SV=1;tr|Q0VGT3|Q0VGT3_MOUSE Pogo transposable	4	11	11	11	1	1	0	6	8	5	1	1	2	1	1	0	6	8	5	1	1	2	1	1	0	6	8	5	1	1	2	10.7	10.7	10.7	144.86	1314	1314;1356;1400;1409	0	57.875
D3Z3E8	ENSMUSG00000002227	17454	D3Z3E8;E9PW39;D3YVL0;P23249	D3Z3E8;E9PW39;D3YVL0;P23249	47;47;47;47	47;47;47;47	47;47;47;47	Putative helicase MOV-10	Mov10	tr|D3Z3E8|D3Z3E8_MOUSE RNA helicase OS=Mus musculus OX=10090 GN=Mov10 PE=1 SV=1;tr|E9PW39|E9PW39_MOUSE RNA helicase OS=Mus musculus OX=10090 GN=Mov10 PE=1 SV=1;tr|D3YVL0|D3YVL0_MOUSE RNA helicase OS=Mus musculus OX=10090 GN=Mov10 PE=1 SV=2;sp|P23249|MOV10_	4	47	47	47	34	35	39	38	38	36	33	36	40	34	35	39	38	38	36	33	36	40	34	35	39	38	38	36	33	36	40	52.4	52.4	52.4	113.6	1004	1004;1077;1077;1004	0	323.31
D3YVU7	ENSMUSG00000029475	30841	D3YVU7;D3YVU4;E9QL25;Q6P1G2-2;Q6P1G2;Q6P1G2-4	D3YVU7;D3YVU4;E9QL25;Q6P1G2-2;Q6P1G2	3;3;3;3;3;1	3;3;3;3;3;1	3;3;3;3;3;1	Lysine-specific demethylase 2B	Kdm2b	tr|D3YVU7|D3YVU7_MOUSE [Histone H3]-dimethyl-L-lysine(36) demethylase OS=Mus musculus OX=10090 GN=Kdm2b PE=1 SV=1;tr|D3YVU4|D3YVU4_MOUSE [Histone H3]-dimethyl-L-lysine(36) demethylase OS=Mus musculus OX=10090 GN=Kdm2b PE=1 SV=2;tr|E9QL25|E9QL25_MOUSE [Hist	6	3	3	3	0	0	1	1	1	1	0	1	3	0	0	1	1	1	1	0	1	3	0	0	1	1	1	1	0	1	3	2.6	2.6	2.6	143.26	1254	1254;1266;1303;776;1309;114	0	6.3354
D3YVZ9	ENSMUSG00000054312	66292	D3YVZ9;P58059	D3YVZ9;P58059	2;2	2;2	2;2	28S ribosomal protein S21, mitochondrial	Mrps21	tr|D3YVZ9|D3YVZ9_MOUSE 28S ribosomal protein S21, mitochondrial (Fragment) OS=Mus musculus OX=10090 GN=Mrps21 PE=1 SV=1;sp|P58059|RT21_MOUSE 28S ribosomal protein S21, mitochondrial OS=Mus musculus OX=10090 GN=Mrps21 PE=1 SV=1	2	2	2	2	2	2	2	1	0	1	0	1	0	2	2	2	1	0	1	0	1	0	2	2	2	1	0	1	0	1	0	61.4	61.4	61.4	5.1089	44	44;87	0	16.635
G3X927	ENSMUSG00000041375	243846	G3X927;D3YW42;Q8VC31;G3UXR7	G3X927;D3YW42;Q8VC31;G3UXR7	2;2;2;1	2;2;2;1	2;2;2;1	Coiled-coil domain-containing protein 9	Ccdc9	tr|G3X927|G3X927_MOUSE Coiled-coil domain-containing protein 9 OS=Mus musculus OX=10090 GN=Ccdc9 PE=1 SV=1;tr|D3YW42|D3YW42_MOUSE Coiled-coil domain-containing protein 9 OS=Mus musculus OX=10090 GN=Ccdc9 PE=1 SV=2;sp|Q8VC31|CCDC9_MOUSE Coiled-coil domain-c	4	2	2	2	0	1	1	0	0	2	0	0	0	0	1	1	0	0	2	0	0	0	0	1	1	0	0	2	0	0	0	4	4	4	61.576	544	544;589;543;99	0	4.6381
D3YWC2	ENSMUSG00000029404	65105	D3YWC2;D3Z6F1;Q9JM93	D3YWC2;D3Z6F1;Q9JM93	2;2;2	2;2;2	2;2;2	ADP-ribosylation factor-like protein 6-interacting protein 4	Arl6ip4	tr|D3YWC2|D3YWC2_MOUSE ADP-ribosylation factor-like protein 6-interacting protein 4 OS=Mus musculus OX=10090 GN=Arl6ip4 PE=1 SV=1;tr|D3Z6F1|D3Z6F1_MOUSE ADP-ribosylation factor-like protein 6-interacting protein 4 (Fragment) OS=Mus musculus OX=10090 GN=Arl	3	2	2	2	2	0	0	1	1	2	1	1	1	2	0	0	1	1	2	1	1	1	2	0	0	1	1	2	1	1	1	18	18	18	22.605	200	200;226;229	0	7.6605
Q7TQI3	ENSMUSG00000024767	107260	Q7TQI3;D3YWF6;D3Z7K0	Q7TQI3;D3YWF6;D3Z7K0	3;3;2	3;3;2	3;3;2	Ubiquitin thioesterase OTUB1	Otub1	sp|Q7TQI3|OTUB1_MOUSE Ubiquitin thioesterase OTUB1 OS=Mus musculus OX=10090 GN=Otub1 PE=1 SV=2;tr|D3YWF6|D3YWF6_MOUSE Ubiquitinyl hydrolase 1 OS=Mus musculus OX=10090 GN=Otub1 PE=1 SV=1;tr|D3Z7K0|D3Z7K0_MOUSE Ubiquitinyl hydrolase 1 (Fragment) OS=Mus muscu	3	3	3	3	0	3	0	0	0	0	0	0	0	0	3	0	0	0	0	0	0	0	0	3	0	0	0	0	0	0	0	11.8	11.8	11.8	31.27	271	271;241;95	0	8.4788
D3YWI4	ENSMUSG00000107283	17527	D3YWI4;E9Q1I6;F8WHT5;G3UVW1;P19258	D3YWI4;E9Q1I6;F8WHT5;G3UVW1;P19258	1;1;1;1;1	1;1;1;1;1	1;1;1;1;1	Protein Mpv17	Mpv17	tr|D3YWI4|D3YWI4_MOUSE Protein Mpv17 OS=Mus musculus OX=10090 GN=Mpv17 PE=1 SV=1;tr|E9Q1I6|E9Q1I6_MOUSE Protein Mpv17 OS=Mus musculus OX=10090 GN=Mpv17 PE=1 SV=1;tr|F8WHT5|F8WHT5_MOUSE Protein Mpv17 OS=Mus musculus OX=10090 GN=Mpv17 PE=1 SV=1;tr|G3UVW1|G3U	5	1	1	1	0	0	1	0	0	0	0	1	1	0	0	1	0	0	0	0	1	1	0	0	1	0	0	0	0	1	1	5.6	5.6	5.6	18.049	162	162;165;170;178;176	1	-2
D3Z3N4	ENSMUSG00000020069	432467	D3Z3N4;D3YWT1;D3Z6Y3	D3Z3N4;D3YWT1	5;5;2	4;4;1	4;4;1	heterogeneous nuclear ribonucleoprotein H3	Hnrnph3	tr|D3Z3N4|D3Z3N4_MOUSE Heterogeneous nuclear ribonucleoprotein H3 OS=Mus musculus OX=10090 GN=Hnrnph3 PE=1 SV=1;tr|D3YWT1|D3YWT1_MOUSE Heterogeneous nuclear ribonucleoprotein H3 OS=Mus musculus OX=10090 GN=Hnrnph3 PE=1 SV=1	3	5	4	4	1	2	2	1	0	0	1	3	0	1	2	2	1	0	0	0	2	0	1	2	2	1	0	0	0	2	0	18.5	16.2	16.2	36.869	346	346;331;71	0	23.614
D3YX34	ENSMUSG00000031865	13191	D3YX34;E9Q586;E9Q3M3;O08788-2;O08788	D3YX34;E9Q586;E9Q3M3;O08788-2;O08788	2;2;2;2;2	2;2;2;2;2	2;2;2;2;2	Dynactin subunit 1	Dctn1	tr|D3YX34|D3YX34_MOUSE Dynactin subunit 1 OS=Mus musculus OX=10090 GN=Dctn1 PE=1 SV=1;tr|E9Q586|E9Q586_MOUSE Dynactin subunit 1 OS=Mus musculus OX=10090 GN=Dctn1 PE=1 SV=1;tr|E9Q3M3|E9Q3M3_MOUSE Dynactin subunit 1 OS=Mus musculus OX=10090 GN=Dctn1 PE=1 SV=	5	2	2	2	0	2	0	0	0	0	0	0	0	0	2	0	0	0	0	0	0	0	0	2	0	0	0	0	0	0	0	2.3	2.3	2.3	126.82	1142	1142;1239;1264;1243;1281	0	14.792
O70252	ENSMUSG00000004070	15369	O70252;D3YX62;D3Z4A2	O70252;D3YX62;D3Z4A2	3;3;2	3;3;2	3;3;2	Heme oxygenase 2	Hmox2	sp|O70252|HMOX2_MOUSE Heme oxygenase 2 OS=Mus musculus OX=10090 GN=Hmox2 PE=1 SV=1;tr|D3YX62|D3YX62_MOUSE Heme oxygenase (biliverdin-producing) (Fragment) OS=Mus musculus OX=10090 GN=Hmox2 PE=1 SV=1;tr|D3Z4A2|D3Z4A2_MOUSE Heme oxygenase 2 (Fragment) OS=Mus	3	3	3	3	0	1	1	0	0	0	0	1	2	0	1	1	0	0	0	0	1	2	0	1	1	0	0	0	0	1	2	12.7	12.7	12.7	35.738	315	315;228;65	0	6.5144
S4R1M2	ENSMUSG00000071054	224903	S4R1M2;D3YXK2;S4R2Q5;S4R1W0	S4R1M2;D3YXK2	18;18;1;1	18;18;1;1	11;11;1;1	Scaffold attachment factor B1	Safb	tr|S4R1M2|S4R1M2_MOUSE Scaffold attachment factor B1 OS=Mus musculus OX=10090 GN=Safb PE=1 SV=1;sp|D3YXK2|SAFB1_MOUSE Scaffold attachment factor B1 OS=Mus musculus OX=10090 GN=Safb PE=1 SV=2	4	18	18	11	15	11	15	7	9	8	10	14	7	15	11	15	7	9	8	10	14	7	9	7	10	4	4	4	4	8	4	24.7	24.7	15.7	105.32	939	939;937;44;169	0	155.24
D3YYB2	ENSMUSG00000030264	14911	D3YYB2;P97770-3;P97770-2;P97770	D3YYB2;P97770-3;P97770-2;P97770	1;1;1;1	1;1;1;1	1;1;1;1	THUMP domain-containing protein 3	Thumpd3	tr|D3YYB2|D3YYB2_MOUSE THUMP domain-containing protein 3 (Fragment) OS=Mus musculus OX=10090 GN=Thumpd3 PE=1 SV=8;sp|P97770-3|THUM3_MOUSE Isoform 3 of THUMP domain-containing protein 3 OS=Mus musculus OX=10090 GN=Thumpd3;sp|P97770-2|THUM3_MOUSE Isoform 2 o	4	1	1	1	1	0	0	0	0	0	0	1	1	1	0	0	0	0	0	0	1	1	1	0	0	0	0	0	0	1	1	6.8	6.8	6.8	24.681	221	221;315;504;505	0.0044987	2.7899
F6UFG6	ENSMUSG00000032249	11737	F6UFG6;D3YYE1;D3Z7M9;O35381;Q64G17	F6UFG6;D3YYE1;D3Z7M9;O35381	5;5;5;5;2	2;2;2;2;0	2;2;2;2;0	Acidic leucine-rich nuclear phosphoprotein 32 family member A	Anp32a	tr|F6UFG6|F6UFG6_MOUSE Acidic leucine-rich nuclear phosphoprotein 32 family member A (Fragment) OS=Mus musculus OX=10090 GN=Anp32a PE=1 SV=1;tr|D3YYE1|D3YYE1_MOUSE Acidic leucine-rich nuclear phosphoprotein 32 family member A (Fragment) OS=Mus musculus OX=	5	5	2	2	4	4	3	4	2	3	4	5	4	1	1	1	1	0	0	1	2	1	1	1	1	1	0	0	1	2	1	29.7	18.1	18.1	15.306	138	138;198;233;247;123	0.0019881	3.046
D3YYM6	ENSMUSG00000012848	20103	D3YYM6;D3Z1S8;Q91V55;P97461	D3YYM6;D3Z1S8;Q91V55;P97461	7;7;7;6	7;7;7;6	7;7;7;6	40S ribosomal protein S5;40S ribosomal protein S5, N-terminally processed	Rps5	tr|D3YYM6|D3YYM6_MOUSE 40S ribosomal protein S5 (Fragment) OS=Mus musculus OX=10090 GN=Rps5 PE=1 SV=1;tr|D3Z1S8|D3Z1S8_MOUSE 40S ribosomal protein S5 (Fragment) OS=Mus musculus OX=10090 GN=Rps5 PE=1 SV=1;tr|Q91V55|Q91V55_MOUSE 40S ribosomal protein S5 OS=M	4	7	7	7	1	6	1	3	3	4	1	3	2	1	6	1	3	3	4	1	3	2	1	6	1	3	3	4	1	3	2	39	39	39	20.413	182	182;189;204;204	0	42.659
D3YYT1	ENSMUSG00000022536	74022	D3YYT1;Q922P9	D3YYT1;Q922P9	19;18	19;18	19;18	Putative oxidoreductase GLYR1	Glyr1	tr|D3YYT1|D3YYT1_MOUSE Glyoxylate reductase 1 homolog OS=Mus musculus OX=10090 GN=Glyr1 PE=1 SV=1;sp|Q922P9|GLYR1_MOUSE Putative oxidoreductase GLYR1 OS=Mus musculus OX=10090 GN=Glyr1 PE=1 SV=1	2	19	19	19	12	11	11	14	12	14	15	12	17	12	11	11	14	12	14	15	12	17	12	11	11	14	12	14	15	12	17	37.7	37.7	37.7	60.435	552	552;546	0	121.48
D3YYW8	ENSMUSG00000036733	68035	D3YYW8;Q91V81	D3YYW8;Q91V81	1;1	1;1	1;1	RNA-binding protein 42	Rbm42	tr|D3YYW8|D3YYW8_MOUSE RNA-binding motif protein 42 OS=Mus musculus OX=10090 GN=Rbm42 PE=1 SV=1;sp|Q91V81|RBM42_MOUSE RNA-binding protein 42 OS=Mus musculus OX=10090 GN=Rbm42 PE=1 SV=2	2	1	1	1	0	0	0	0	0	0	1	1	0	0	0	0	0	0	0	1	1	0	0	0	0	0	0	0	1	1	0	3.8	3.8	3.8	47.214	449	449;478	0.0020284	3.2274
D3YZ06	ENSMUSG00000004951	15507	D3YZ06;P14602-3;P14602-2;P14602	D3YZ06;P14602-3;P14602-2;P14602	3;3;3;3	3;3;3;3	3;3;3;3	Heat shock protein beta-1	Hspb1	tr|D3YZ06|D3YZ06_MOUSE Heat shock protein beta-1 OS=Mus musculus OX=10090 GN=Hspb1 PE=1 SV=1;sp|P14602-3|HSPB1_MOUSE Isoform C of Heat shock protein beta-1 OS=Mus musculus OX=10090 GN=Hspb1;sp|P14602-2|HSPB1_MOUSE Isoform B of Heat shock protein beta-1 OS=	4	3	3	3	0	1	1	0	0	0	0	1	0	0	1	1	0	0	0	0	1	0	0	1	1	0	0	0	0	1	0	23.8	23.8	23.8	16.818	147	147;175;197;209	0	23.974
D3YZ09	ENSMUSG00000028010	68147	D3YZ09;Q9CY66-3;Q9CY66-2;Q9CY66;F6SL78	D3YZ09;Q9CY66-3;Q9CY66-2;Q9CY66	5;5;5;5;1	5;5;5;5;1	5;5;5;5;1	H/ACA ribonucleoprotein complex subunit 1	Gar1	tr|D3YZ09|D3YZ09_MOUSE H/ACA ribonucleoprotein complex subunit (Fragment) OS=Mus musculus OX=10090 GN=Gar1 PE=1 SV=1;sp|Q9CY66-3|GAR1_MOUSE Isoform 3 of H/ACA ribonucleoprotein complex subunit 1 OS=Mus musculus OX=10090 GN=Gar1;sp|Q9CY66-2|GAR1_MOUSE Isofo	5	5	5	5	3	2	2	4	3	4	5	3	3	3	2	2	4	3	4	5	3	3	3	2	2	4	3	4	5	3	3	31.8	31.8	31.8	20.448	198	198;217;229;231;79	0	16.928
D3YZJ1	ENSMUSG00000015837	18412	D3YZJ1;Q64337-2;Q64337	D3YZJ1;Q64337-2;Q64337	2;2;2	2;2;2	2;2;2	Sequestosome-1	Sqstm1	tr|D3YZJ1|D3YZJ1_MOUSE Sequestosome-1 OS=Mus musculus OX=10090 GN=Sqstm1 PE=1 SV=1;sp|Q64337-2|SQSTM_MOUSE Isoform 2 of Sequestosome-1 OS=Mus musculus OX=10090 GN=Sqstm1;sp|Q64337|SQSTM_MOUSE Sequestosome-1 OS=Mus musculus OX=10090 GN=Sqstm1 PE=1 SV=1	3	2	2	2	2	0	1	1	0	0	0	1	1	2	0	1	1	0	0	0	1	1	2	0	1	1	0	0	0	1	1	7.3	7.3	7.3	41.683	382	382;404;442	0	4.6048
D3YZP9	ENSMUSG00000048701	76551	D3YZP9	D3YZP9	1	1	1	Coiled-coil domain-containing protein 6	Ccdc6	sp|D3YZP9|CCDC6_MOUSE Coiled-coil domain-containing protein 6 OS=Mus musculus OX=10090 GN=Ccdc6 PE=1 SV=1	1	1	1	1	0	1	0	0	0	0	0	0	0	0	1	0	0	0	0	0	0	0	0	1	0	0	0	0	0	0	0	2.3	2.3	2.3	52.938	469	469	0.00978	2.4271
D3YZX3	ENSMUSG00000029713	14693	D3YZX3;E9QKR0;P62880;P62874;H3BLF7;D3Z1T4;D3Z1M1;E9PWM7;H3BKR2;Q61011;P29387	D3YZX3;E9QKR0;P62880;P62874;H3BLF7;D3Z1T4;D3Z1M1;E9PWM7;H3BKR2;Q61011;P29387	2;2;2;2;1;1;1;1;1;1;1	2;2;2;2;1;1;1;1;1;1;1	2;2;2;2;1;1;1;1;1;1;1	Guanine nucleotide-binding protein G(I)/G(S)/G(T) subunit beta-2;Guanine nucleotide-binding protein G(I)/G(S)/G(T) subunit beta-1;Guanine nucleotide-binding protein G(I)/G(S)/G(T) subunit beta-3;Guanine nucleotide-binding protein subunit beta-4	Gnb2;Gnb1;Gnb3;Gnb4	tr|D3YZX3|D3YZX3_MOUSE Guanine nucleotide-binding protein G(I)/G(S)/G(T) subunit beta-2 OS=Mus musculus OX=10090 GN=Gnb2 PE=1 SV=1;tr|E9QKR0|E9QKR0_MOUSE Guanine nucleotide-binding protein G(I)/G(S)/G(T) subunit beta-2 OS=Mus musculus OX=10090 GN=Gnb2 PE=1	11	2	2	2	0	2	0	0	0	0	0	0	0	0	2	0	0	0	0	0	0	0	0	2	0	0	0	0	0	0	0	6.8	6.8	6.8	32.408	296	296;382;340;340;108;188;227;240;273;340;340	0.0014114	3.807
D3Z0K6	ENSMUSG00000039968	242860	D3Z0K6;A0A0G2JEI9	D3Z0K6;A0A0G2JEI9	2;1	2;1	2;1	round spermatid basic protein 1-like	Rsbn1l	tr|D3Z0K6|D3Z0K6_MOUSE Round spermatid basic protein 1-like OS=Mus musculus OX=10090 GN=Rsbn1l PE=1 SV=1;tr|A0A0G2JEI9|A0A0G2JEI9_MOUSE Round spermatid basic protein 1-like OS=Mus musculus OX=10090 GN=Rsbn1l PE=1 SV=1	2	2	2	2	1	1	1	0	0	1	0	0	0	1	1	1	0	0	1	0	0	0	1	1	1	0	0	1	0	0	0	3	3	3	91.745	821	821;616	0.0014451	4.1716
D3Z0M9	ENSMUSG00000003360	74351	D3Z0M9	D3Z0M9	15	15	15	DEAD box helicase 23	Ddx23	tr|D3Z0M9|D3Z0M9_MOUSE RNA helicase OS=Mus musculus OX=10090 GN=Ddx23 PE=1 SV=1	1	15	15	15	5	4	6	10	10	6	10	8	11	5	4	6	10	10	6	10	8	11	5	4	6	10	10	6	10	8	11	21.6	21.6	21.6	95.493	819	819	0	36.053
Q62189	ENSMUSG00000061479	53607	Q62189;D3Z0S6;D6RI83	Q62189;D3Z0S6;D6RI83	2;2;1	2;2;1	2;2;1	U1 small nuclear ribonucleoprotein A	Snrpa	sp|Q62189|SNRPA_MOUSE U1 small nuclear ribonucleoprotein A OS=Mus musculus OX=10090 GN=Snrpa PE=1 SV=3;tr|D3Z0S6|D3Z0S6_MOUSE U1 small nuclear ribonucleoprotein A (Fragment) OS=Mus musculus OX=10090 GN=Snrpa PE=1 SV=1;tr|D6RI83|D6RI83_MOUSE U1 small nuclea	3	2	2	2	2	1	1	1	0	0	0	2	1	2	1	1	1	0	0	0	2	1	2	1	1	1	0	0	0	2	1	7.7	7.7	7.7	31.835	287	287;247;44	0	5.4086
D3Z2U2	ENSMUSG00000027506	21985	D3Z2U2;D3Z637;D3Z125;E9PUA7;D3Z7X7;F8WHQ1;Q62393-2;Q62393-3;Q62393	D3Z2U2;D3Z637;D3Z125;E9PUA7;D3Z7X7;F8WHQ1;Q62393-2;Q62393-3;Q62393	1;1;1;1;1;1;1;1;1	1;1;1;1;1;1;1;1;1	1;1;1;1;1;1;1;1;1	Tumor protein D52	Tpd52	tr|D3Z2U2|D3Z2U2_MOUSE Tumor protein D52 (Fragment) OS=Mus musculus OX=10090 GN=Tpd52 PE=1 SV=1;tr|D3Z637|D3Z637_MOUSE Tumor protein D52 OS=Mus musculus OX=10090 GN=Tpd52 PE=1 SV=1;tr|D3Z125|D3Z125_MOUSE Tumor protein D52 (Fragment) OS=Mus musculus OX=1009	9	1	1	1	0	1	0	0	0	0	0	0	0	0	1	0	0	0	0	0	0	0	0	1	0	0	0	0	0	0	0	19.5	19.5	19.5	8.7859	77	77;162;179;194;206;247;185;199;224	0.00323	2.8258
Q8BML9	ENSMUSG00000032604	97541	Q8BML9;D3Z158;A0A140LHZ5;A0A140LHJ3;A0A140LIS6;A0A140LHB3;F6TDS3;A0A140LIZ4;A0A0A6YY08;A0A140LJK5;A0A140LJH1;A0A140LID3;A0A140LII8;A0A140LIN2;A0A140LJH2;A0A140LIR0;A0A140LHC3	Q8BML9;D3Z158	12;12;4;3;3;3;3;3;2;2;2;1;1;1;1;1;1	11;11;3;3;3;3;3;2;2;2;2;1;1;1;1;1;1	11;11;3;3;3;3;3;2;2;2;2;1;1;1;1;1;1	glutaminyl-tRNA synthetase	Qars	sp|Q8BML9|SYQ_MOUSE Glutamine--tRNA ligase OS=Mus musculus OX=10090 GN=Qars1 PE=1 SV=1;tr|D3Z158|D3Z158_MOUSE Glutaminyl-tRNA synthetase OS=Mus musculus OX=10090 GN=Qars PE=1 SV=2	17	12	11	11	6	5	7	8	4	4	8	4	5	5	4	6	7	4	4	8	4	5	5	4	6	7	4	4	8	4	5	15.2	14.2	14.2	87.676	775	775;751;341;173;273;246;154;117;152;182;100;153;79;160;134;121;67	0	26.425
D3Z1B9	ENSMUSG00000052459	11964	D3Z1B9;P50516-2;P50516;D3YWH3;D3YZ23	D3Z1B9;P50516-2;P50516;D3YWH3	3;3;3;2;1	3;3;3;2;1	3;3;3;2;1	V-type proton ATPase catalytic subunit A	Atp6v1a	tr|D3Z1B9|D3Z1B9_MOUSE V-type proton ATPase catalytic subunit A (Fragment) OS=Mus musculus OX=10090 GN=Atp6v1a PE=1 SV=1;sp|P50516-2|VATA_MOUSE Isoform 2 of V-type proton ATPase catalytic subunit A OS=Mus musculus OX=10090 GN=Atp6v1a;sp|P50516|VATA_MOUSE V	5	3	3	3	0	3	0	0	0	0	0	0	0	0	3	0	0	0	0	0	0	0	0	3	0	0	0	0	0	0	0	16.9	16.9	16.9	25.898	237	237;509;617;196;77	0	9.6037
D3Z1H8	ENSMUSG00000011884	56356	D3Z1H8;D3Z1H9;Q9JL62	D3Z1H8;D3Z1H9;Q9JL62	1;1;1	1;1;1	1;1;1	Glycolipid transfer protein	Gltp	tr|D3Z1H8|D3Z1H8_MOUSE Glycolipid transfer protein OS=Mus musculus OX=10090 GN=Gltp PE=1 SV=1;tr|D3Z1H9|D3Z1H9_MOUSE Glycolipid transfer protein OS=Mus musculus OX=10090 GN=Gltp PE=1 SV=1;sp|Q9JL62|GLTP_MOUSE Glycolipid transfer protein OS=Mus musculus OX=	3	1	1	1	0	1	0	0	0	0	0	0	0	0	1	0	0	0	0	0	0	0	0	1	0	0	0	0	0	0	0	6.7	6.7	6.7	20.275	179	179;190;209	0.0051118	2.7375
D3Z2H7	ENSMUSG00000034101	12388	D3Z2H7;D3Z2H2;E9Q8Z6;E9Q8Z5;G3X9V2;E9Q904;E9Q901;E9Q986;E9Q903;E9Q8Z9;E9Q8Z4;E9Q905;E9Q907;E9Q906;D3Z7H6;E9Q8Z8;P30999-2;P30999-3;P30999	D3Z2H7;D3Z2H2;E9Q8Z6;E9Q8Z5;G3X9V2;E9Q904;E9Q901;E9Q986;E9Q903;E9Q8Z9;E9Q8Z4;E9Q905;E9Q907;E9Q906;D3Z7H6;E9Q8Z8;P30999-2;P30999-3;P30999	2;2;2;2;2;2;2;2;2;2;2;2;2;2;2;2;2;2;2	2;2;2;2;2;2;2;2;2;2;2;2;2;2;2;2;2;2;2	2;2;2;2;2;2;2;2;2;2;2;2;2;2;2;2;2;2;2	Catenin delta-1	Ctnnd1	tr|D3Z2H7|D3Z2H7_MOUSE Catenin delta-1 OS=Mus musculus OX=10090 GN=Ctnnd1 PE=1 SV=1;tr|D3Z2H2|D3Z2H2_MOUSE Catenin delta-1 OS=Mus musculus OX=10090 GN=Ctnnd1 PE=1 SV=1;tr|E9Q8Z6|E9Q8Z6_MOUSE Catenin delta-1 OS=Mus musculus OX=10090 GN=Ctnnd1 PE=1 SV=1;tr|E	19	2	2	2	0	2	0	0	0	0	0	0	0	0	2	0	0	0	0	0	0	0	0	2	0	0	0	0	0	0	0	3.6	3.6	3.6	67.935	609	609;884;961;940;932;913;907;830;892;878;868;866;860;839;837;967;911;917;938	0.0014368	4.1121
D3Z2K2	ENSMUSG00000058267	64659	D3Z2K2;Q9CR88	D3Z2K2;Q9CR88	1;1	1;1	1;1	28S ribosomal protein S14, mitochondrial	Mrps14	tr|D3Z2K2|D3Z2K2_MOUSE 28S ribosomal protein S14, mitochondrial OS=Mus musculus OX=10090 GN=Mrps14 PE=1 SV=1;sp|Q9CR88|RT14_MOUSE 28S ribosomal protein S14, mitochondrial OS=Mus musculus OX=10090 GN=Mrps14 PE=1 SV=1	2	1	1	1	1	1	1	0	0	0	0	0	0	1	1	1	0	0	0	0	0	0	1	1	1	0	0	0	0	0	0	12.3	12.3	12.3	14.279	122	122;128	0.0014482	4.212
D3Z2Z1	ENSMUSG00000049550	56430	D3Z2Z1;F8WIA1;Q922J3;F6RCU2;F7CB97;D3Z3M7;Q922J3-2	D3Z2Z1;F8WIA1;Q922J3;F6RCU2;F7CB97;D3Z3M7;Q922J3-2	3;3;3;2;2;2;2	3;3;3;2;2;2;2	3;3;3;2;2;2;2	CAP-Gly domain-containing linker protein 1	Clip1	tr|D3Z2Z1|D3Z2Z1_MOUSE CAP-Gly domain-containing linker protein 1 OS=Mus musculus OX=10090 GN=Clip1 PE=1 SV=1;tr|F8WIA1|F8WIA1_MOUSE CAP-Gly domain-containing linker protein 1 OS=Mus musculus OX=10090 GN=Clip1 PE=1 SV=1;sp|Q922J3|CLIP1_MOUSE CAP-Gly domain	7	3	3	3	0	3	0	0	0	0	0	0	0	0	3	0	0	0	0	0	0	0	0	3	0	0	0	0	0	0	0	2.4	2.4	2.4	160.01	1426	1426;1437;1391;1066;1182;1320;1315	0	17.249
D3Z315	ENSMUSG00000055681	59042	D3Z315;O89079;F6YFR7;F6XIG5	D3Z315;O89079;F6YFR7	3;3;2;1	3;3;2;1	3;3;2;1	Coatomer subunit epsilon	Cope	tr|D3Z315|D3Z315_MOUSE Coatomer subunit epsilon (Fragment) OS=Mus musculus OX=10090 GN=Cope PE=1 SV=1;sp|O89079|COPE_MOUSE Coatomer subunit epsilon OS=Mus musculus OX=10090 GN=Cope PE=1 SV=3;tr|F6YFR7|F6YFR7_MOUSE Coatomer subunit epsilon (Fragment) OS=Mus	4	3	3	3	0	0	0	1	1	1	1	0	0	0	0	0	1	1	1	1	0	0	0	0	0	1	1	1	1	0	0	20.3	20.3	20.3	25.37	227	227;308;234;116	0	8.8683
D3Z390	ENSMUSG00000037933	76895	D3Z390;Q921C5-3;Q921C5;Q921C5-2	D3Z390;Q921C5-3;Q921C5;Q921C5-2	1;1;1;1	1;1;1;1	1;1;1;1	Protein bicaudal D homolog 2	Bicd2	tr|D3Z390|D3Z390_MOUSE Protein bicaudal D homolog 2 OS=Mus musculus OX=10090 GN=Bicd2 PE=1 SV=2;sp|Q921C5-3|BICD2_MOUSE Isoform 3 of Protein bicaudal D homolog 2 OS=Mus musculus OX=10090 GN=Bicd2;sp|Q921C5|BICD2_MOUSE Protein bicaudal D homolog 2 OS=Mus mu	4	1	1	1	0	1	0	0	0	0	0	0	0	0	1	0	0	0	0	0	0	0	0	1	0	0	0	0	0	0	0	1.3	1.3	1.3	84.702	746	746;338;820;851	0.0069401	2.6405
F6W7C7	ENSMUSG00000032563	94062	F6W7C7;D3Z456;Q99N95;A0A1L1SU47	F6W7C7;D3Z456;Q99N95;A0A1L1SU47	4;4;4;3	4;4;4;3	4;4;4;3	39S ribosomal protein L3, mitochondrial	Mrpl3	tr|F6W7C7|F6W7C7_MOUSE 39S ribosomal protein L3, mitochondrial OS=Mus musculus OX=10090 GN=Mrpl3 PE=1 SV=3;tr|D3Z456|D3Z456_MOUSE 39S ribosomal protein L3, mitochondrial OS=Mus musculus OX=10090 GN=Mrpl3 PE=1 SV=1;sp|Q99N95|RM03_MOUSE 39S ribosomal protein	4	4	4	4	3	0	3	0	0	0	0	0	0	3	0	3	0	0	0	0	0	0	3	0	3	0	0	0	0	0	0	36.5	36.5	36.5	17.553	156	156;304;348;137	0	11.464
D3Z497	ENSMUSG00000048185	631906	D3Z497;Q9WTZ1	D3Z497;Q9WTZ1	1;1	1;1	1;1	RING-box protein 2	Gm7075;Rnf7	tr|D3Z497|D3Z497_MOUSE Predicted gene 7075 OS=Mus musculus OX=10090 GN=Gm7075 PE=3 SV=1;sp|Q9WTZ1|RBX2_MOUSE RING-box protein 2 OS=Mus musculus OX=10090 GN=Rnf7 PE=1 SV=1	2	1	1	1	0	0	1	1	0	0	0	1	0	0	0	1	1	0	0	0	1	0	0	0	1	1	0	0	0	1	0	10.7	10.7	10.7	12.652	112	112;113	0.0013755	3.4016
D3Z4U0	ENSMUSG00000028180	53861	D3Z4U0;Q9R020;E9PUD0;Q9R020-2;A0A0H2UH20;A0A0G2JGE3;V9GX51	D3Z4U0;Q9R020;E9PUD0;Q9R020-2	6;6;4;4;2;1;1	6;6;4;4;2;1;1	6;6;4;4;2;1;1	Zinc finger Ran-binding domain-containing protein 2	Zranb2	tr|D3Z4U0|D3Z4U0_MOUSE Zinc finger Ran-binding domain-containing protein 2 OS=Mus musculus OX=10090 GN=Zranb2 PE=1 SV=2;sp|Q9R020|ZRAB2_MOUSE Zinc finger Ran-binding domain-containing protein 2 OS=Mus musculus OX=10090 GN=Zranb2 PE=1 SV=2;tr|E9PUD0|E9PUD0_	7	6	6	6	2	3	1	3	0	1	2	1	1	2	3	1	3	0	1	2	1	1	2	3	1	3	0	1	2	1	1	18.4	18.4	18.4	36.281	320	320;330;293;293;208;38;40	0	11.978
D3Z6D2	ENSMUSG00000025920	29819	D3Z6D2;Q8CJ67;E2QRQ3;Q8CJ67-3;Q8CJ67-2;Q8CJ67-4;D3Z461;Q8CJ67-5	D3Z6D2;Q8CJ67;E2QRQ3;Q8CJ67-3;Q8CJ67-2;Q8CJ67-4	13;13;12;12;12;8;1;1	12;12;11;11;11;7;1;1	12;12;11;11;11;7;1;1	Double-stranded RNA-binding protein Staufen homolog 2	Stau2	tr|D3Z6D2|D3Z6D2_MOUSE Double-stranded RNA-binding protein Staufen homolog 2 OS=Mus musculus OX=10090 GN=Stau2 PE=1 SV=1;sp|Q8CJ67|STAU2_MOUSE Double-stranded RNA-binding protein Staufen homolog 2 OS=Mus musculus OX=10090 GN=Stau2 PE=1 SV=1;tr|E2QRQ3|E2QRQ	8	13	12	12	4	3	7	6	4	7	6	7	4	4	3	6	5	4	7	6	7	4	4	3	6	5	4	7	6	7	4	31.7	30.3	30.3	56.255	511	511;570;473;479;538;206;97;125	0	38.82
D3Z6W2	ENSMUSG00000024539	19255	D3Z6W2;Q06180-2;Q06180	D3Z6W2;Q06180-2;Q06180	1;1;1	1;1;1	1;1;1	Tyrosine-protein phosphatase non-receptor type;Tyrosine-protein phosphatase non-receptor type 2	Ptpn2	tr|D3Z6W2|D3Z6W2_MOUSE Tyrosine-protein phosphatase non-receptor type OS=Mus musculus OX=10090 GN=Ptpn2 PE=1 SV=1;sp|Q06180-2|PTN2_MOUSE Isoform 2 of Tyrosine-protein phosphatase non-receptor type 2 OS=Mus musculus OX=10090 GN=Ptpn2;sp|Q06180|PTN2_MOUSE Ty	3	1	1	1	0	0	1	1	0	0	0	1	1	0	0	1	1	0	0	0	1	1	0	0	1	1	0	0	0	1	1	3.9	3.9	3.9	42.291	363	363;382;406	0.0013774	3.4131
E9PX66	ENSMUSG00000053134	72195	E9PX66;D3Z6Y8;Q9CZV5	E9PX66;D3Z6Y8;Q9CZV5	1;1;1	1;1;1	1;1;1	STAGA complex 65 subunit gamma	Supt7l	tr|E9PX66|E9PX66_MOUSE STAGA complex 65 subunit gamma OS=Mus musculus OX=10090 GN=Supt7l PE=1 SV=1;tr|D3Z6Y8|D3Z6Y8_MOUSE STAGA complex 65 subunit gamma OS=Mus musculus OX=10090 GN=Supt7l PE=1 SV=1;sp|Q9CZV5|ST65G_MOUSE STAGA complex 65 subunit gamma OS=Mu	3	1	1	1	0	0	0	0	0	0	0	1	1	0	0	0	0	0	0	0	1	1	0	0	0	0	0	0	0	1	1	5.2	5.2	5.2	38.551	344	344;363;412	0.003861	2.7957
D3Z789	ENSMUSG00000019804	54198	D3Z789;D3Z6Z0;Q78ZM0;O70492;Q6ZWQ5;Q3TGS7;Q3V2H3;O70493	D3Z789;D3Z6Z0;Q78ZM0;O70492;Q6ZWQ5;Q3TGS7;Q3V2H3;O70493	2;2;2;2;1;1;1;1	2;2;2;2;1;1;1;1	2;2;2;2;1;1;1;1	Sorting nexin-3;Sorting nexin-12	Snx3;Snx12	tr|D3Z789|D3Z789_MOUSE Sorting nexin-3 OS=Mus musculus OX=10090 GN=Snx3 PE=1 SV=1;tr|D3Z6Z0|D3Z6Z0_MOUSE Sorting nexin-3 OS=Mus musculus OX=10090 GN=Snx3 PE=1 SV=1;tr|Q78ZM0|Q78ZM0_MOUSE Sorting nexin-3 OS=Mus musculus OX=10090 GN=Snx3 PE=1 SV=1;sp|O70492|	8	2	2	2	0	2	0	0	0	0	0	0	0	0	2	0	0	0	0	0	0	0	0	2	0	0	0	0	0	0	0	17.7	17.7	17.7	14.766	130	130;140;162;162;162;166;170;165	0.0014124	3.8213
D3Z780	ENSMUSG00000029145	13667	D3Z780;Q61749;Q61749-2;A0A0J9YUY0;A0A0J9YTQ7	D3Z780;Q61749;Q61749-2;A0A0J9YUY0	5;5;5;3;1	5;5;5;3;1	5;5;5;3;1	Translation initiation factor eIF-2B subunit delta	Eif2b4	tr|D3Z780|D3Z780_MOUSE Translation initiation factor eIF-2B subunit delta OS=Mus musculus OX=10090 GN=Eif2b4 PE=1 SV=1;sp|Q61749|EI2BD_MOUSE Translation initiation factor eIF-2B subunit delta OS=Mus musculus OX=10090 GN=Eif2b4 PE=1 SV=2;sp|Q61749-2|EI2BD_M	5	5	5	5	0	0	0	0	0	2	1	2	1	0	0	0	0	0	2	1	2	1	0	0	0	0	0	2	1	2	1	12.7	12.7	12.7	62.352	566	566;524;544;245;100	0	9.5528
H7BWX9	ENSMUSG00000020738	170930	H7BWX9;D3Z794;P61957;G3UZX6	H7BWX9;D3Z794;P61957;G3UZX6	2;2;2;1	2;2;2;1	1;1;1;0	Small ubiquitin-related modifier 2	Sumo2;Sumo3	tr|H7BWX9|H7BWX9_MOUSE Small ubiquitin-related modifier 2 OS=Mus musculus OX=10090 GN=Sumo2 PE=1 SV=1;tr|D3Z794|D3Z794_MOUSE Small ubiquitin-related modifier 2 OS=Mus musculus OX=10090 GN=Sumo2 PE=1 SV=1;sp|P61957|SUMO2_MOUSE Small ubiquitin-related modifi	4	2	2	1	2	2	2	2	2	2	2	2	2	2	2	2	2	2	2	2	2	2	1	1	1	1	1	1	1	1	1	41.5	41.5	18.9	6.0139	53	53;71;95;47	0	22.463
Q8R0X7	ENSMUSG00000020097	20397	Q8R0X7;D6REF7;D3YZT4	Q8R0X7;D6REF7;D3YZT4	2;2;1	2;2;1	2;2;1	Sphingosine-1-phosphate lyase 1	Sgpl1	sp|Q8R0X7|SGPL1_MOUSE Sphingosine-1-phosphate lyase 1 OS=Mus musculus OX=10090 GN=Sgpl1 PE=1 SV=1;tr|D6REF7|D6REF7_MOUSE Sphingosine-1-phosphate lyase 1 OS=Mus musculus OX=10090 GN=Sgpl1 PE=1 SV=1;tr|D3YZT4|D3YZT4_MOUSE Sphingosine-1-phosphate lyase 1 (Fra	3	2	2	2	1	0	0	0	0	0	1	0	1	1	0	0	0	0	0	1	0	1	1	0	0	0	0	0	1	0	1	4.6	4.6	4.6	63.676	568	568;487;199	0	5.4577
D6RFV1	ENSMUSG00000010796	74068	D6RFV1;Q8VD46	D6RFV1;Q8VD46	1;1	1;1	1;1	Ankyrin repeat, SAM and basic leucine zipper domain-containing protein 1	Asz1	tr|D6RFV1|D6RFV1_MOUSE Ankyrin repeat, SAM and basic leucine zipper domain-containing protein 1 OS=Mus musculus OX=10090 GN=Asz1 PE=1 SV=1;sp|Q8VD46|ASZ1_MOUSE Ankyrin repeat, SAM and basic leucine zipper domain-containing protein 1 OS=Mus musculus OX=1009	2	1	1	1	0	0	1	0	0	0	0	0	0	0	0	1	0	0	0	0	0	0	0	0	1	0	0	0	0	0	0	9.5	9.5	9.5	15.962	148	148;475	0	5.5061
E0CXB1	ENSMUSG00000021024	26443	E0CXB1;Q9QUM9	E0CXB1;Q9QUM9	1;1	1;1	1;1	Proteasome subunit alpha type-6	Psma6	tr|E0CXB1|E0CXB1_MOUSE Proteasome subunit alpha type-6 OS=Mus musculus OX=10090 GN=Psma6 PE=1 SV=1;sp|Q9QUM9|PSA6_MOUSE Proteasome subunit alpha type-6 OS=Mus musculus OX=10090 GN=Psma6 PE=1 SV=1	2	1	1	1	1	1	1	1	1	1	1	1	1	1	1	1	1	1	1	1	1	1	1	1	1	1	1	1	1	1	1	5.7	5.7	5.7	25.264	227	227;246	0	6.2573
E0CY46	ENSMUSG00000041879	226432	E0CY46;E0CXB2;E9QKZ2;Q91YE6	E0CY46;E0CXB2;E9QKZ2;Q91YE6	1;1;1;1	1;1;1;1	1;1;1;1	Importin-9	Ipo9	tr|E0CY46|E0CY46_MOUSE Importin-9 OS=Mus musculus OX=10090 GN=Ipo9 PE=1 SV=1;tr|E0CXB2|E0CXB2_MOUSE Importin-9 OS=Mus musculus OX=10090 GN=Ipo9 PE=1 SV=1;tr|E9QKZ2|E9QKZ2_MOUSE Importin-9 OS=Mus musculus OX=10090 GN=Ipo9 PE=1 SV=1;sp|Q91YE6|IPO9_MOUSE Impo	4	1	1	1	1	1	1	1	0	0	1	1	1	1	1	1	1	0	0	1	1	1	1	1	1	1	0	0	1	1	1	38.2	38.2	38.2	5.4132	55	55;655;1040;1041	0	4.3899
E0CXB9	ENSMUSG00000063063	12386	E0CXB9;Q61301-2;Q61301-3;Q61301;Q8BS72	E0CXB9;Q61301-2;Q61301-3;Q61301;Q8BS72	2;2;2;2;1	1;1;1;1;1	1;1;1;1;1	Catenin alpha-2	Ctnna2	tr|E0CXB9|E0CXB9_MOUSE Alpha N-catenin OS=Mus musculus OX=10090 GN=Ctnna2 PE=1 SV=1;sp|Q61301-2|CTNA2_MOUSE Isoform 2 of Catenin alpha-2 OS=Mus musculus OX=10090 GN=Ctnna2;sp|Q61301-3|CTNA2_MOUSE Isoform 3 of Catenin alpha-2 OS=Mus musculus OX=10090 GN=Ctn	5	2	1	1	0	2	0	0	0	0	0	0	0	0	1	0	0	0	0	0	0	0	0	1	0	0	0	0	0	0	0	2.9	1.1	1.1	106.73	966	966;905;918;953;356	0.0069664	2.6551
E0CZ72	ENSMUSG00000021693	16563	E0CZ72;P28740;P28740-1;F8VQ42;P28740-2	E0CZ72;P28740;P28740-1;F8VQ42;P28740-2	17;17;17;16;16	17;17;17;16;16	16;16;16;15;15	Kinesin-like protein;Kinesin-like protein KIF2A	Kif2a	tr|E0CZ72|E0CZ72_MOUSE Kinesin-like protein OS=Mus musculus OX=10090 GN=Kif2a PE=1 SV=1;sp|P28740|KIF2A_MOUSE Kinesin-like protein KIF2A OS=Mus musculus OX=10090 GN=Kif2a PE=1 SV=2;sp|P28740-1|KIF2A_MOUSE Isoform 1 of Kinesin-like protein KIF2A OS=Mus musc	5	17	17	16	11	3	9	10	10	8	10	8	9	11	3	9	10	10	8	10	8	9	10	3	8	9	9	8	10	8	8	24.6	24.6	23.4	83.86	743	743;705;716;671;659	0	49.332
E9PU96	ENSMUSG00000039929	207932	E9PU96;Q571H0;Q571H0-2	E9PU96;Q571H0	19;19;3	19;19;3	19;19;3	Nucleolar pre-ribosomal-associated protein 1	Urb1	tr|E9PU96|E9PU96_MOUSE Nucleolar pre-ribosomal-associated protein 1 OS=Mus musculus OX=10090 GN=Urb1 PE=1 SV=1;sp|Q571H0|NPA1P_MOUSE Nucleolar pre-ribosomal-associated protein 1 OS=Mus musculus OX=10090 GN=Urb1 PE=1 SV=2	3	19	19	19	7	3	4	10	4	8	11	6	9	7	3	4	10	4	8	11	6	9	7	3	4	10	4	8	11	6	9	10.6	10.6	10.6	254.84	2277	2277;2274;231	0	109.31
E9PUA5	ENSMUSG00000024301	16580	E9PUA5;Q9QWT9-2;Q9QWT9;G3UXN2;Q9QWT9-3;G3UX22	E9PUA5;Q9QWT9-2;Q9QWT9;G3UXN2;Q9QWT9-3	5;5;5;4;4;1	5;5;5;4;4;1	5;5;5;4;4;1	Kinesin-like protein;Kinesin-like protein KIFC1	Kifc5b;Kifc1	tr|E9PUA5|E9PUA5_MOUSE Kinesin-like protein OS=Mus musculus OX=10090 GN=Kifc5b PE=1 SV=1;sp|Q9QWT9-2|KIFC1_MOUSE Isoform 2 of Kinesin-like protein KIFC1 OS=Mus musculus OX=10090 GN=Kifc1;sp|Q9QWT9|KIFC1_MOUSE Kinesin-like protein KIFC1 OS=Mus musculus OX=1	6	5	5	5	1	1	1	3	0	2	1	4	2	1	1	1	3	0	2	1	4	2	1	1	1	3	0	2	1	4	2	8.6	8.6	8.6	73.681	672	672;631;674;218;611;79	0	14.327
E9PV22	ENSMUSG00000029028	72946	E9PV22;Q505F5	E9PV22;Q505F5	5;5	5;5	5;5	Leucine-rich repeat-containing protein 47	Lrrc47	tr|E9PV22|E9PV22_MOUSE Leucine-rich repeat-containing protein 47 OS=Mus musculus OX=10090 GN=Lrrc47 PE=1 SV=1;sp|Q505F5|LRC47_MOUSE Leucine-rich repeat-containing protein 47 OS=Mus musculus OX=10090 GN=Lrrc47 PE=1 SV=1	2	5	5	5	2	2	0	0	1	1	2	0	1	2	2	0	0	1	1	2	0	1	2	2	0	0	1	1	2	0	1	11.6	11.6	11.6	65.903	603	603;581	0	21.98
E9PVA8	ENSMUSG00000041638	231659	E9PVA8	E9PVA8	3	3	3	GCN1 activator of EIF2AK4	Gcn1l1	sp|E9PVA8|GCN1_MOUSE eIF-2-alpha kinase activator GCN1 OS=Mus musculus OX=10090 GN=Gcn1 PE=1 SV=1	1	3	3	3	0	2	1	1	1	0	0	0	1	0	2	1	1	1	0	0	0	1	0	2	1	1	1	0	0	0	1	1.7	1.7	1.7	293.02	2671	2671	0	8.1101
E9PZJ0	ENSMUSG00000004530	23790	E9PZJ0;E9PVJ1;E9PX03;Q9WUM4	E9PZJ0;E9PVJ1;E9PX03;Q9WUM4	1;1;1;1	1;1;1;1	1;1;1;1	Coronin;Coronin-1C	Coro1c	tr|E9PZJ0|E9PZJ0_MOUSE Coronin-1C (Fragment) OS=Mus musculus OX=10090 GN=Coro1c PE=1 SV=1;tr|E9PVJ1|E9PVJ1_MOUSE Coronin-1C (Fragment) OS=Mus musculus OX=10090 GN=Coro1c PE=1 SV=1;tr|E9PX03|E9PX03_MOUSE Coronin OS=Mus musculus OX=10090 GN=Coro1c PE=1 SV=1;	4	1	1	1	0	1	0	0	0	0	0	0	0	0	1	0	0	0	0	0	0	0	0	1	0	0	0	0	0	0	0	19.7	19.7	19.7	7.4946	66	66;85;159;474	0.0026025	2.8952
P48774	ENSMUSG00000004032	14866	P48774;E9PVM7;E9Q024;E9PV63;E9Q5L9;A2AE89;D3YZ29;Q80W21;D3YVP6;E9QAC8;A2AE91;F6WHQ7;P15626;D3YVP5;P10649;Q8R5I6;D3YX76	P48774;E9PVM7;E9Q024	5;5;3;2;2;1;1;1;1;1;1;1;1;1;1;1;1	5;5;3;2;2;1;1;1;1;1;1;1;1;1;1;1;1	5;5;3;2;2;1;1;1;1;1;1;1;1;1;1;1;1	Glutathione S-transferase Mu 5	Gstm5	sp|P48774|GSTM5_MOUSE Glutathione S-transferase Mu 5 OS=Mus musculus OX=10090 GN=Gstm5 PE=1 SV=1;tr|E9PVM7|E9PVM7_MOUSE Glutathione S-transferase (Fragment) OS=Mus musculus OX=10090 GN=Gstm5 PE=1 SV=1;tr|E9Q024|E9Q024_MOUSE Glutathione S-transferase Mu 5 O	17	5	5	5	5	2	1	3	2	3	4	4	4	5	2	1	3	2	3	4	4	4	5	2	1	3	2	3	4	4	4	29.5	29.5	29.5	26.635	224	224;215;73;158;69;244;119;218;181;193;184;194;218;214;218;218;184	0	15.808
E9PVX6	ENSMUSG00000031004	17345	E9PVX6;E9PVX6-2;A0A1B0GQV9	E9PVX6;E9PVX6-2	82;78;3	82;78;3	82;78;3	antigen identified by monoclonal antibody Ki 67	Mki67	sp|E9PVX6|KI67_MOUSE Proliferation marker protein Ki-67 OS=Mus musculus OX=10090 GN=Mki67 PE=1 SV=1;sp|E9PVX6-2|KI67_MOUSE Isoform 2 of Proliferation marker protein Ki-67 OS=Mus musculus OX=10090 GN=Mki67	3	82	82	82	42	29	43	53	49	43	43	41	54	42	29	43	53	49	43	43	41	54	42	29	43	53	49	43	43	41	54	36.8	36.8	36.8	350.86	3177	3177;2936;192	0	323.31
E9PW15	ENSMUSG00000017548	52615	E9PW15;Q80U70	E9PW15;Q80U70	9;9	9;9	9;9	Polycomb protein Suz12	Suz12	tr|E9PW15|E9PW15_MOUSE Polycomb protein Suz12 OS=Mus musculus OX=10090 GN=Suz12 PE=1 SV=1;sp|Q80U70|SUZ12_MOUSE Polycomb protein Suz12 OS=Mus musculus OX=10090 GN=Suz12 PE=1 SV=2	2	9	9	9	4	2	6	6	5	3	5	7	7	4	2	6	6	5	3	5	7	7	4	2	6	6	5	3	5	7	7	20.5	20.5	20.5	80.292	718	718;741	0	51.038
E9PW20	ENSMUSG00000001017	66511	E9PW20;Q9CY57-5;Q9CY57-4;Q9CY57-3;Q9CY57-2;Q9CY57;D3YZA1;D3Z7T7	E9PW20;Q9CY57-5;Q9CY57-4;Q9CY57-3;Q9CY57-2;Q9CY57;D3YZA1;D3Z7T7	4;4;4;4;4;4;3;3	4;4;4;4;4;4;3;3	4;4;4;4;4;4;3;3	Chromatin target of PRMT1 protein	Chtop	tr|E9PW20|E9PW20_MOUSE Chromatin target of PRMT1 protein OS=Mus musculus OX=10090 GN=Chtop PE=1 SV=1;sp|Q9CY57-5|CHTOP_MOUSE Isoform 5 of Chromatin target of PRMT1 protein OS=Mus musculus OX=10090 GN=Chtop;sp|Q9CY57-4|CHTOP_MOUSE Isoform 4 of Chromatin tar	8	4	4	4	1	2	2	2	2	3	1	2	3	1	2	2	2	2	3	1	2	3	1	2	2	2	2	3	1	2	3	24.6	24.6	24.6	22.106	203	203;177;178;202;224;249;123;195	0	28.075
E9PWG4	ENSMUSG00000061816	17901	E9PWG4;P05977-2;P05977;A0A087WRZ7;E0CZ30;A0A0G2JDW2;P09542;A0A0G2JDM3;A2A6Q8;Q9CZ19;P09541	E9PWG4;P05977-2;P05977;A0A087WRZ7;E0CZ30	6;6;6;3;3;2;2;1;1;1;1	6;6;6;3;3;2;2;1;1;1;1	6;6;6;3;3;2;2;1;1;1;1	Myosin light chain 1/3, skeletal muscle isoform	Myl1	tr|E9PWG4|E9PWG4_MOUSE Myosin light chain 1/3, skeletal muscle isoform OS=Mus musculus OX=10090 GN=Myl1 PE=1 SV=1;sp|P05977-2|MYL1_MOUSE Isoform MLC3 of Myosin light chain 1/3, skeletal muscle isoform OS=Mus musculus OX=10090 GN=Myl1;sp|P05977|MYL1_MOUSE M	11	6	6	6	4	0	0	0	0	0	0	4	0	4	0	0	0	0	0	0	4	0	4	0	0	0	0	0	0	4	0	41	41	41	17.689	161	161;150;188;92;124;184;204;127;191;193;193	0	15.388
E9PWG6	ENSMUSG00000015880	54392	E9PWG6	E9PWG6	5	5	5	non-SMC condensin I complex, subunit G	Ncapg	tr|E9PWG6|E9PWG6_MOUSE Non-SMC condensin I complex, subunit G OS=Mus musculus OX=10090 GN=Ncapg PE=1 SV=1	1	5	5	5	2	1	1	3	1	0	0	3	3	2	1	1	3	1	0	0	3	3	2	1	1	3	1	0	0	3	3	7.2	7.2	7.2	112.87	1004	1004	0	15.396
G3UZI3	ENSMUSG00000003644	20111	G3UZI3;E9PWV3;Q505N6;F6RQA2;F6Q8A4;P18653;B1AXP0;B1AXN9;P18654;A0A338P701;Q9WUT3	G3UZI3;E9PWV3;Q505N6;F6RQA2;F6Q8A4;P18653;B1AXP0;B1AXN9;P18654	3;3;3;3;3;3;2;2;2;1;1	3;3;3;3;3;3;2;2;2;1;1	2;2;2;2;2;2;1;1;1;1;1	Ribosomal protein S6 kinase;Ribosomal protein S6 kinase alpha-1;Ribosomal protein S6 kinase alpha-3	Rps6ka1;Rps6ka3	tr|G3UZI3|G3UZI3_MOUSE Non-specific serine/threonine protein kinase OS=Mus musculus OX=10090 GN=Rps6ka1 PE=1 SV=1;tr|E9PWV3|E9PWV3_MOUSE Ribosomal protein S6 kinase OS=Mus musculus OX=10090 GN=Rps6ka1 PE=1 SV=1;tr|Q505N6|Q505N6_MOUSE Ribosomal protein S6 k	11	3	3	2	0	3	1	0	0	1	0	2	1	0	3	1	0	0	1	0	2	1	0	2	1	0	0	1	0	1	1	5.9	5.9	4.6	70.648	625	625;719;735;736;741;724;211;712;740;223;733	0	5.7999
E9PWW9	ENSMUSG00000035623	233532	E9PWW9;A0A0U1RPA7;A0A0U1RP31	E9PWW9	5;1;1	5;1;1	5;1;1	remodeling and spacing factor 1	Rsf1	tr|E9PWW9|E9PWW9_MOUSE Remodeling and spacing factor 1 OS=Mus musculus OX=10090 GN=Rsf1 PE=1 SV=2	3	5	5	5	1	0	1	2	0	0	1	0	1	1	0	1	2	0	0	1	0	1	1	0	1	2	0	0	1	0	1	4.9	4.9	4.9	161.75	1441	1441;109;121	0	16.002
E9PWX4	ENSMUSG00000006154	67425	E9PWX4;E9Q4X5;Q8R5F8	E9PWX4;E9Q4X5;Q8R5F8	1;1;1	1;1;1	1;1;1	Epidermal growth factor receptor kinase substrate 8-like protein 1	Eps8l1	tr|E9PWX4|E9PWX4_MOUSE Epidermal growth factor receptor kinase substrate 8-like protein 1 (Fragment) OS=Mus musculus OX=10090 GN=Eps8l1 PE=1 SV=1;tr|E9Q4X5|E9Q4X5_MOUSE Epidermal growth factor receptor kinase substrate 8-like protein 1 OS=Mus musculus OX=1	3	1	1	1	0	1	0	0	0	0	0	0	0	0	1	0	0	0	0	0	0	0	0	1	0	0	0	0	0	0	0	7.9	7.9	7.9	17.01	152	152;777;716	0.0069009	2.5989
Q8C0C7	ENSMUSG00000003808	66590	Q8C0C7;E9PWY9;D6RIJ2	Q8C0C7;E9PWY9	12;12;1	12;12;1	12;12;1	Phenylalanine--tRNA ligase alpha subunit	Farsa	sp|Q8C0C7|SYFA_MOUSE Phenylalanine--tRNA ligase alpha subunit OS=Mus musculus OX=10090 GN=Farsa PE=1 SV=1;tr|E9PWY9|E9PWY9_MOUSE Phenylalanine--tRNA ligase OS=Mus musculus OX=10090 GN=Farsa PE=1 SV=1	3	12	12	12	5	3	5	8	6	8	7	7	8	5	3	5	8	6	8	7	7	8	5	3	5	8	6	8	7	7	8	27	27	27	57.598	508	508;507;105	0	57.502
E9PY85	ENSMUSG00000032215	225215	E9PY85;Q99L28;G3UW80;G3UZF1	E9PY85;Q99L28;G3UW80;G3UZF1	2;2;1;1	2;2;1;1	2;2;1;1	Probable ribosome biogenesis protein RLP24	Rsl24d1;Gm20509	tr|E9PY85|E9PY85_MOUSE Probable ribosome biogenesis protein RLP24 OS=Mus musculus OX=10090 GN=Rsl24d1 PE=1 SV=1;sp|Q99L28|RLP24_MOUSE Probable ribosome biogenesis protein RLP24 OS=Mus musculus OX=10090 GN=Rsl24d1 PE=2 SV=1;tr|G3UW80|G3UW80_MOUSE Probable r	4	2	2	2	2	1	2	2	1	2	1	1	1	2	1	2	2	1	2	1	1	1	2	1	2	2	1	2	1	1	1	11.6	11.6	11.6	19.506	164	164;163;71;325	0	7.2522
E9PYH6	ENSMUSG00000042308	233904	E9PYH6;A0A0U1RNP2;G3UZ56;D3YUD4;Q8CFT2-2;Q8CFT2	E9PYH6;A0A0U1RNP2	3;2;1;1;1;1	3;2;1;1;1;1	3;2;1;1;1;1	Histone-lysine N-methyltransferase	Setd1a	sp|E9PYH6|SET1A_MOUSE Histone-lysine N-methyltransferase SETD1A OS=Mus musculus OX=10090 GN=Setd1a PE=1 SV=1;tr|A0A0U1RNP2|A0A0U1RNP2_MOUSE Predicted gene, 49388 (Fragment) OS=Mus musculus OX=10090 GN=Gm49388 PE=4 SV=1	6	3	3	3	1	0	2	0	0	1	0	0	0	1	0	2	0	0	1	0	0	0	1	0	2	0	0	1	0	0	0	2	2	2	186.06	1716	1716;1173;87;247;1944;1985	0.001443	4.1488
E9PZ97	ENSMUSG00000030528	12144	E9PZ97;O88700;A0A0U1RPS3;A0A0U1RPP0	E9PZ97;O88700	4;4;1;1	4;4;1;1	4;4;1;1	Bloom syndrome protein homolog	Blm	tr|E9PZ97|E9PZ97_MOUSE DNA helicase OS=Mus musculus OX=10090 GN=Blm PE=1 SV=1;sp|O88700|BLM_MOUSE Bloom syndrome protein homolog OS=Mus musculus OX=10090 GN=Blm PE=1 SV=1	4	4	4	4	2	1	0	2	2	2	1	2	3	2	1	0	2	2	2	1	2	3	2	1	0	2	2	2	1	2	3	3.5	3.5	3.5	158.76	1419	1419;1416;42;155	0	13.777
E9PZF0	ENSMUSG00000091228		E9PZF0;Q01768	E9PZF0;Q01768	4;4	4;4	1;1	Nucleoside diphosphate kinase;Nucleoside diphosphate kinase B	Gm20390;Nme2	tr|E9PZF0|E9PZF0_MOUSE Nucleoside diphosphate kinase OS=Mus musculus OX=10090 GN=Gm20390 PE=3 SV=1;sp|Q01768|NDKB_MOUSE Nucleoside diphosphate kinase B OS=Mus musculus OX=10090 GN=Nme2 PE=1 SV=1	2	4	4	1	0	4	0	0	0	0	0	0	0	0	4	0	0	0	0	0	0	0	0	1	0	0	0	0	0	0	0	25.5	25.5	3.7	30.2	267	267;152	0	8.5481
E9Q5H2	ENSMUSG00000015749	66471	E9Q5H2;E9PZF5;P97822-2;P97822;E9Q0X5	E9Q5H2;E9PZF5;P97822-2;P97822	4;4;4;4;1	4;4;4;4;1	4;4;4;4;1	Acidic leucine-rich nuclear phosphoprotein 32 family member E	Anp32e	tr|E9Q5H2|E9Q5H2_MOUSE Acidic leucine-rich nuclear phosphoprotein 32 family member E (Fragment) OS=Mus musculus OX=10090 GN=Anp32e PE=1 SV=1;tr|E9PZF5|E9PZF5_MOUSE Acidic leucine-rich nuclear phosphoprotein 32 family member E (Fragment) OS=Mus musculus OX=	5	4	4	4	2	0	1	1	0	1	0	1	1	2	0	1	1	0	1	0	1	1	2	0	1	1	0	1	0	1	1	56.1	56.1	56.1	12.078	107	107;171;248;260;219	0	19.388
E9Q006	ENSMUSG00000060904	104303	E9Q006;F8WIB1;P61211	E9Q006;F8WIB1;P61211	1;1;1	1;1;1	1;1;1	ADP-ribosylation factor-like protein 1	Arl1	tr|E9Q006|E9Q006_MOUSE ADP-ribosylation factor-like protein 1 (Fragment) OS=Mus musculus OX=10090 GN=Arl1 PE=1 SV=1;tr|F8WIB1|F8WIB1_MOUSE ADP-ribosylation factor-like protein 1 (Fragment) OS=Mus musculus OX=10090 GN=Arl1 PE=1 SV=1;sp|P61211|ARL1_MOUSE ADP	3	1	1	1	0	1	0	0	0	0	0	1	0	0	1	0	0	0	0	0	1	0	0	1	0	0	0	0	0	1	0	21.2	21.2	21.2	5.6265	52	52;138;181	0.0044958	2.7865
F6Z247	ENSMUSG00000024283	225131	F6Z247;E9Q4Y9;E9Q020;E9Q5D5;Q924H7-3;Q924H7-2;Q924H7	F6Z247;E9Q4Y9;E9Q020;E9Q5D5;Q924H7-3;Q924H7-2;Q924H7	1;1;1;1;1;1;1	1;1;1;1;1;1;1	1;1;1;1;1;1;1	WW domain-containing adapter protein with coiled-coil	Wac	tr|F6Z247|F6Z247_MOUSE WW domain-containing adapter protein with coiled-coil (Fragment) OS=Mus musculus OX=10090 GN=Wac PE=1 SV=8;tr|E9Q4Y9|E9Q4Y9_MOUSE WW domain-containing adapter protein with coiled-coil OS=Mus musculus OX=10090 GN=Wac PE=1 SV=1;tr|E9Q0	7	1	1	1	1	1	1	1	1	1	1	1	1	1	1	1	1	1	1	1	1	1	1	1	1	1	1	1	1	1	1	4.1	4.1	4.1	32.299	295	295;494;495;597;543;601;646	1	-2
E9Q186	ENSMUSG00000021243	73736	E9Q186;Q9CTH6	E9Q186;Q9CTH6	4;4	4;4	4;4	rRNA-processing protein FCF1 homolog	Fcf1	tr|E9Q186|E9Q186_MOUSE rRNA-processing protein FCF1 homolog OS=Mus musculus OX=10090 GN=Fcf1 PE=1 SV=1;sp|Q9CTH6|FCF1_MOUSE rRNA-processing protein FCF1 homolog OS=Mus musculus OX=10090 GN=Fcf1 PE=2 SV=2	2	4	4	4	4	1	2	4	4	3	4	4	4	4	1	2	4	4	3	4	4	4	4	1	2	4	4	3	4	4	4	23.1	23.1	23.1	21.919	186	186;198	0	13.766
E9Q1G8	ENSMUSG00000001833	235072	E9Q1G8;E9Q9F5;O55131	E9Q1G8;E9Q9F5;O55131	3;3;3	3;3;3	3;3;3	Septin-7	Septin7	tr|E9Q1G8|E9Q1G8_MOUSE Septin OS=Mus musculus OX=10090 GN=Septin7 PE=1 SV=2;tr|E9Q9F5|E9Q9F5_MOUSE Septin OS=Mus musculus OX=10090 GN=Septin7 PE=1 SV=2;sp|O55131|SEPT7_MOUSE Septin-7 OS=Mus musculus OX=10090 GN=Septin7 PE=1 SV=1	3	3	3	3	0	3	0	0	0	0	0	0	0	0	3	0	0	0	0	0	0	0	0	3	0	0	0	0	0	0	0	8.2	8.2	8.2	50.648	437	437;437;436	0	7.7748
E9Q1Z0	ENSMUSG00000048699	239673	E9Q1Z0	E9Q1Z0	12	1	0	keratin 90	4732456N10Rik	tr|E9Q1Z0|E9Q1Z0_MOUSE Keratin 90 OS=Mus musculus OX=10090 GN=Krt90 PE=1 SV=1	1	12	1	0	8	8	9	9	8	8	7	9	9	0	0	0	0	0	0	1	0	0	0	0	0	0	0	0	0	0	0	16.7	2	0	58.224	538	538	0.0097621	2.4235
E9Q236-3	ENSMUSG00000032849	239273	E9Q236-3;E9Q467;E9Q236-2;E9Q236	E9Q236-3;E9Q467;E9Q236-2;E9Q236	1;1;1;1	1;1;1;1	1;1;1;1	ATP-binding cassette, sub-family C (CFTR/MRP), member 4	Abcc4	sp|E9Q236-3|MRP4_MOUSE Isoform 3 of ATP-binding cassette sub-family C member 4 OS=Mus musculus OX=10090 GN=Abcc4;tr|E9Q467|E9Q467_MOUSE ATP-binding cassette, sub-family C (CFTR/MRP), member 4 OS=Mus musculus OX=10090 GN=Abcc4 PE=1 SV=1;sp|E9Q236-2|MRP4_MOU	4	1	1	1	0	0	0	0	0	0	0	1	0	0	0	0	0	0	0	0	1	0	0	0	0	0	0	0	0	1	0	1.4	1.4	1.4	139.1	1240	1240;1250;1250;1325	1	-2
E9Q284	ENSMUSG00000033983	12812	E9Q284;Q5SU73	E9Q284;Q5SU73	8;8	8;8	8;8	Coilin	Coil	tr|E9Q284|E9Q284_MOUSE Coilin OS=Mus musculus OX=10090 GN=Coil PE=1 SV=1;sp|Q5SU73|COIL_MOUSE Coilin OS=Mus musculus OX=10090 GN=Coil PE=1 SV=1	2	8	8	8	3	6	3	6	4	4	6	8	6	3	6	3	6	4	4	6	8	6	3	6	3	6	4	4	6	8	6	23	23	23	62.262	573	573;570	0	26.447
E9Q2X6	ENSMUSG00000034349	70099	E9Q2X6;Q8CG47;A0A0A6YXY3;Q3U763	E9Q2X6;Q8CG47	15;15;2;1	15;15;2;1	15;15;2;1	Structural maintenance of chromosomes protein;Structural maintenance of chromosomes protein 4	Smc4	tr|E9Q2X6|E9Q2X6_MOUSE Structural maintenance of chromosomes protein OS=Mus musculus OX=10090 GN=Smc4 PE=1 SV=1;sp|Q8CG47|SMC4_MOUSE Structural maintenance of chromosomes protein 4 OS=Mus musculus OX=10090 GN=Smc4 PE=1 SV=1	4	15	15	15	7	3	4	4	3	2	7	5	8	7	3	4	4	3	2	7	5	8	7	3	4	4	3	2	7	5	8	12.1	12.1	12.1	144.21	1261	1261;1286;109;337	0	35.762
E9Q2Z1-2	ENSMUSG00000071226	330409	E9Q2Z1-2;E9Q2Z1;A0A5H1ZRM0;A0A5H1ZRM3	E9Q2Z1-2;E9Q2Z1	8;8;1;1	8;8;1;1	8;8;1;1	CECR2, histone acetyl-lysine reader	Cecr2	sp|E9Q2Z1-2|CECR2_MOUSE Isoform 2 of Cat eye syndrome critical region protein 2 homolog OS=Mus musculus OX=10090 GN=Cecr2;sp|E9Q2Z1|CECR2_MOUSE Cat eye syndrome critical region protein 2 homolog OS=Mus musculus OX=10090 GN=Cecr2 PE=1 SV=1	4	8	8	8	1	0	3	4	1	4	4	3	3	1	0	3	4	1	4	4	3	3	1	0	3	4	1	4	4	3	3	8.7	8.7	8.7	158.58	1425	1425;1453;234;357	0	19.536
E9Q317	ENSMUSG00000021963	20220	E9Q317;O55128;D3YY73;D3YY55;D3Z2N9	E9Q317;O55128;D3YY73;D3YY55;D3Z2N9	8;7;4;4;4	8;7;4;4;4	8;7;4;4;4	Histone deacetylase complex subunit SAP18	Gm10094;Sap18	tr|E9Q317|E9Q317_MOUSE 18 kDa Sin3-associated polypeptide OS=Mus musculus OX=10090 GN=Sap18 PE=1 SV=1;sp|O55128|SAP18_MOUSE Histone deacetylase complex subunit SAP18 OS=Mus musculus OX=10090 GN=Sap18 PE=1 SV=1;tr|D3YY73|D3YY73_MOUSE Histone deacetylase com	5	8	8	8	5	5	6	5	2	1	4	4	4	5	5	6	5	2	1	4	4	4	5	5	6	5	2	1	4	4	4	46.5	46.5	46.5	19.586	172	172;153;92;107;111	0	20.99
E9Q3G8	ENSMUSG00000021374	218210	E9Q3G8	E9Q3G8	3	3	3	nucleoporin 153	Nup153	tr|E9Q3G8|E9Q3G8_MOUSE Nucleoporin 153 OS=Mus musculus OX=10090 GN=Nup153 PE=1 SV=1	1	3	3	3	2	2	3	3	0	0	2	2	2	2	2	3	3	0	0	2	2	2	2	2	3	3	0	0	2	2	2	3.1	3.1	3.1	152.01	1462	1462	0	9.206
E9Q3I3	ENSMUSG00000021990	219140	E9Q3I3	E9Q3I3	1	1	1	spermatogenesis associated 13	Spata13	tr|E9Q3I3|E9Q3I3_MOUSE Spermatogenesis-associated protein 13 OS=Mus musculus OX=10090 GN=Spata13 PE=1 SV=1	1	1	1	1	0	0	1	0	0	0	1	1	0	0	0	1	0	0	0	1	1	0	0	0	1	0	0	0	1	1	0	0.7	0.7	0.7	138.07	1244	1244	0.0086527	2.4999
G3UY29	ENSMUSG00000077450	19326	G3UY29;E9Q3P9;F8WGS1;G3UZD3;P62492;P46638;G3UZL4	G3UY29;E9Q3P9;F8WGS1;G3UZD3;P62492;P46638;G3UZL4	4;4;4;4;4;4;3	4;4;4;4;4;4;3	4;4;4;4;4;4;3	Ras-related protein Rab-11A;Ras-related protein Rab-11B	Rab11b;Rab11a	tr|G3UY29|G3UY29_MOUSE Ras-related protein Rab-11B OS=Mus musculus OX=10090 GN=Rab11b PE=4 SV=1;tr|E9Q3P9|E9Q3P9_MOUSE Ras-related protein Rab-11A OS=Mus musculus OX=10090 GN=Rab11a PE=4 SV=1;tr|F8WGS1|F8WGS1_MOUSE Ras-related protein Rab-11A (Fragment) OS	7	4	4	4	0	4	0	0	0	0	0	0	0	0	4	0	0	0	0	0	0	0	0	4	0	0	0	0	0	0	0	28.9	28.9	28.9	16.924	149	149;153;155;193;216;218;125	0	13.751
Q9EQK5	ENSMUSG00000030681	78388	Q9EQK5;E9Q3X0;D3Z2N7	Q9EQK5;E9Q3X0	7;7;2	7;7;2	7;7;2	Major vault protein	Mvp	sp|Q9EQK5|MVP_MOUSE Major vault protein OS=Mus musculus OX=10090 GN=Mvp PE=1 SV=4;tr|E9Q3X0|E9Q3X0_MOUSE Major vault protein OS=Mus musculus OX=10090 GN=Mvp PE=1 SV=1	3	7	7	7	0	7	0	0	0	0	0	0	0	0	7	0	0	0	0	0	0	0	0	7	0	0	0	0	0	0	0	10	10	10	95.923	861	861;870;134	0	15.946
E9Q4T0	ENSMUSG00000044783	381280	E9Q4T0;E9QKG8;Q6PG16-3;Q6PG16-2;Q6PG16	E9Q4T0;E9QKG8;Q6PG16-3;Q6PG16-2;Q6PG16	3;3;3;3;3	3;3;3;3;3	3;3;3;3;3	Holliday junction recognition protein	Hjurp	tr|E9Q4T0|E9Q4T0_MOUSE Holliday junction recognition protein OS=Mus musculus OX=10090 GN=Hjurp PE=1 SV=1;tr|E9QKG8|E9QKG8_MOUSE Holliday junction recognition protein OS=Mus musculus OX=10090 GN=Hjurp PE=1 SV=1;sp|Q6PG16-3|HJURP_MOUSE Isoform 3 of Holliday	5	3	3	3	1	0	0	1	2	1	0	2	2	1	0	0	1	2	1	0	2	2	1	0	0	1	2	1	0	2	2	6.8	6.8	6.8	65.714	591	591;667;591;650;667	0	8.8983
E9Q4T4	ENSMUSG00000090946	72123	E9Q4T4	E9Q4T4	3	3	3	coiled-coil domain containing 71 like	Ccdc71l	tr|E9Q4T4|E9Q4T4_MOUSE Coiled-coil domain-containing 71-like OS=Mus musculus OX=10090 GN=Ccdc71l PE=1 SV=1	1	3	3	3	1	0	0	0	0	1	0	0	1	1	0	0	0	0	1	0	0	1	1	0	0	0	0	1	0	0	1	17.4	17.4	17.4	24.212	218	218	0.0014235	3.9727
E9Q557	ENSMUSG00000054889	109620	E9Q557;E9PZW0	E9Q557;E9PZW0	90;72	90;72	90;72	Desmoplakin	Dsp	sp|E9Q557|DESP_MOUSE Desmoplakin OS=Mus musculus OX=10090 GN=Dsp PE=1 SV=1;tr|E9PZW0|E9PZW0_MOUSE Desmoplakin OS=Mus musculus OX=10090 GN=Dsp PE=1 SV=1	2	90	90	90	37	84	44	35	32	28	28	45	29	37	84	44	35	32	28	28	45	29	37	84	44	35	32	28	28	45	29	31.9	31.9	31.9	332.91	2883	2883;2284	0	323.31
E9Q5B5	ENSMUSG00000000628	15277	E9Q5B5;O08528;E9Q9M6;E9Q3Z4;E9Q8S8;Q3TRM8	E9Q5B5;O08528;E9Q9M6;E9Q3Z4;E9Q8S8;Q3TRM8	2;2;1;1;1;1	2;2;1;1;1;1	2;2;1;1;1;1	Hexokinase;Hexokinase-2;Hexokinase-3	Hk2;Hk3	tr|E9Q5B5|E9Q5B5_MOUSE Hexokinase OS=Mus musculus OX=10090 GN=Hk2 PE=1 SV=1;sp|O08528|HXK2_MOUSE Hexokinase-2 OS=Mus musculus OX=10090 GN=Hk2 PE=1 SV=1;tr|E9Q9M6|E9Q9M6_MOUSE Hexokinase-2 (Fragment) OS=Mus musculus OX=10090 GN=Hk2 PE=1 SV=1;tr|E9Q3Z4|E9Q3Z	6	2	2	2	0	2	0	0	0	0	0	0	0	0	2	0	0	0	0	0	0	0	0	2	0	0	0	0	0	0	0	3	3	3	99.213	889	889;917;43;867;877;922	0	5.0247
E9Q5F4	ENSMUSG00000029580	11461	E9Q5F4;G3UZ07;E9Q606;E9Q2D1;F6WX90;V9GXQ2	E9Q5F4;G3UZ07;E9Q606	12;8;6;4;2;1	1;0;0;0;0;0	1;0;0;0;0;0	actin, beta	Actb;Actg1	tr|E9Q5F4|E9Q5F4_MOUSE Actin, cytoplasmic 1 (Fragment) OS=Mus musculus OX=10090 GN=Actb PE=1 SV=1;tr|G3UZ07|G3UZ07_MOUSE Actin, cytoplasmic 2 (Fragment) OS=Mus musculus OX=10090 GN=Actg1 PE=1 SV=1;tr|E9Q606|E9Q606_MOUSE Actin, cytoplasmic 1 (Fragment) OS=M	6	12	1	1	9	12	10	8	8	8	8	8	8	0	1	0	0	0	0	0	0	0	0	1	0	0	0	0	0	0	0	57.7	3.4	3.4	29.442	265	265;268;150;108;43;156	1	-2
E9Q5K9-3	ENSMUSG00000035851	231386	E9Q5K9-3;E9Q5K9-2;E9Q5K9;D6RG95	E9Q5K9-3;E9Q5K9-2;E9Q5K9;D6RG95	7;7;7;5	7;7;7;5	7;7;7;5	YTH domain-containing protein 1	Ythdc1	sp|E9Q5K9-3|YTDC1_MOUSE Isoform 3 of YTH domain-containing protein 1 OS=Mus musculus OX=10090 GN=Ythdc1;sp|E9Q5K9-2|YTDC1_MOUSE Isoform 2 of YTH domain-containing protein 1 OS=Mus musculus OX=10090 GN=Ythdc1;sp|E9Q5K9|YTDC1_MOUSE YTH domain-containing prot	4	7	7	7	3	3	3	2	2	3	1	5	6	3	3	3	2	2	3	1	5	6	3	3	3	2	2	3	1	5	6	8.9	8.9	8.9	82.753	710	710;728;736;545	0	23.095
E9Q616	ENSMUSG00000069833	66395	E9Q616;A0A494BBD5;G5E8K8;A0A494B8Y7	E9Q616	13;3;2;2	13;3;2;2	13;3;2;2	AHNAK nucleoprotein (desmoyokin)	Ahnak	tr|E9Q616|E9Q616_MOUSE AHNAK nucleoprotein (desmoyokin) OS=Mus musculus OX=10090 GN=Ahnak PE=1 SV=1	4	13	13	13	0	13	1	0	0	0	0	1	0	0	13	1	0	0	0	0	1	0	0	13	1	0	0	0	0	1	0	8.5	8.5	8.5	604.25	5656	5656;311;150;176	0	48.146
E9Q634	ENSMUSG00000032220	71602	E9Q634	E9Q634	2	2	2	Unconventional myosin-Ie	Myo1e	sp|E9Q634|MYO1E_MOUSE Unconventional myosin-Ie OS=Mus musculus OX=10090 GN=Myo1e PE=1 SV=1	1	2	2	2	0	1	1	0	0	0	0	0	0	0	1	1	0	0	0	0	0	0	0	1	1	0	0	0	0	0	0	2.3	2.3	2.3	126.82	1107	1107	0.0014144	3.8389
Q3UIX4	ENSMUSG00000055436	69207	Q3UIX4;F6RDI8;E9Q6E5;D3Z4B0;F6TN80;D6RE22;F6X2U6;A0A0G2JEG1	Q3UIX4;F6RDI8;E9Q6E5;D3Z4B0;F6TN80;D6RE22	4;4;4;3;2;2;1;1	4;4;4;3;2;2;1;1	4;4;4;3;2;2;1;1	serine and arginine-rich splicing factor 11	Srsf11	tr|Q3UIX4|Q3UIX4_MOUSE Serine and arginine-rich-splicing factor 11 OS=Mus musculus OX=10090 GN=Srsf11 PE=1 SV=1;tr|F6RDI8|F6RDI8_MOUSE Serine and arginine-rich-splicing factor 11 (Fragment) OS=Mus musculus OX=10090 GN=Srsf11 PE=1 SV=1;tr|E9Q6E5|E9Q6E5_MOUS	8	4	4	4	3	2	2	2	3	3	2	3	3	3	2	2	2	3	3	2	3	3	3	2	2	2	3	3	2	3	3	13.9	13.9	13.9	53.102	476	476;500;511;192;101;112;53;175	0	34.124
E9Q6R3	ENSMUSG00000027879	20333	E9Q6R3;O08547	E9Q6R3;O08547	1;1	1;1	1;1	Vesicle-trafficking protein SEC22b	Sec22b	tr|E9Q6R3|E9Q6R3_MOUSE Vesicle-trafficking protein SEC22b OS=Mus musculus OX=10090 GN=Sec22b PE=1 SV=1;sp|O08547|SC22B_MOUSE Vesicle-trafficking protein SEC22b OS=Mus musculus OX=10090 GN=Sec22b PE=1 SV=3	2	1	1	1	0	1	0	0	0	0	1	1	0	0	1	0	0	0	0	1	1	0	0	1	0	0	0	0	1	1	0	8.4	8.4	8.4	18.922	166	166;215	0	55.131
Q3U3A7	ENSMUSG00000055817	116871	Q3U3A7;E9Q794;Q3UII8;Q924K8-2;Q924K8;H3BLE1	Q3U3A7;E9Q794;Q3UII8;Q924K8-2;Q924K8;H3BLE1	7;7;7;7;7;5	2;2;2;2;2;1	2;2;2;2;2;1	Metastasis-associated protein MTA3	Mta3	tr|Q3U3A7|Q3U3A7_MOUSE Metastasis-associated protein MTA3 OS=Mus musculus OX=10090 GN=Mta3 PE=1 SV=1;tr|E9Q794|E9Q794_MOUSE Metastasis-associated protein MTA3 OS=Mus musculus OX=10090 GN=Mta3 PE=1 SV=1;tr|Q3UII8|Q3UII8_MOUSE Metastasis-associated protein M	6	7	2	2	4	2	6	6	4	4	6	6	4	1	1	2	1	2	1	1	1	0	1	1	2	1	2	1	1	1	0	16.6	5.5	5.5	58.367	513	513;514;586;512;591;271	0	6.0109
E9Q7G0	ENSMUSG00000066306	101706	E9Q7G0;A0A1B0GSW3;A0A1B0GT61;F6ZQA3;A0A1B0GSH2;A0A1B0GT38	E9Q7G0;A0A1B0GSW3	89;45;37;31;8;7	89;45;37;31;8;7	89;45;37;31;8;7	nuclear mitotic apparatus protein 1	Numa1	sp|E9Q7G0|NUMA1_MOUSE Nuclear mitotic apparatus protein 1 OS=Mus musculus OX=10090 GN=Numa1 PE=1 SV=1;tr|A0A1B0GSW3|A0A1B0GSW3_MOUSE Nuclear mitotic apparatus protein 1 (Fragment) OS=Mus musculus OX=10090 GN=Numa1 PE=1 SV=1	6	89	89	89	67	59	67	68	63	64	64	72	67	67	59	67	68	63	64	64	72	67	67	59	67	68	63	64	64	72	67	52.3	52.3	52.3	235.63	2094	2094;1082;875;741;218;207	0	323.31
E9Q7L1	ENSMUSG00000031976	382038	E9Q7L1;G3UX45	E9Q7L1;G3UX45	25;23	25;23	25;23	URB2 ribosome biogenesis 2 homolog (S. cerevisiae)	Urb2	tr|E9Q7L1|E9Q7L1_MOUSE URB2 ribosome biogenesis 2 homolog (S. cerevisiae) OS=Mus musculus OX=10090 GN=Urb2 PE=1 SV=1;tr|G3UX45|G3UX45_MOUSE URB2 ribosome biogenesis 2 homolog (S. cerevisiae) OS=Mus musculus OX=10090 GN=Urb2 PE=1 SV=1	2	25	25	25	10	7	10	14	13	9	15	13	16	10	7	10	14	13	9	15	13	16	10	7	10	14	13	9	15	13	16	17.7	17.7	17.7	171.62	1524	1524;1296	0	73.295
E9Q7P1	ENSMUSG00000079022	69700	E9Q7P1	E9Q7P1	1	1	1	collagen, type XXII, alpha 1	Col22a1	tr|E9Q7P1|E9Q7P1_MOUSE Collagen, type XXII, alpha 1 OS=Mus musculus OX=10090 GN=Col22a1 PE=1 SV=1	1	1	1	1	0	1	0	0	0	0	0	0	0	0	1	0	0	0	0	0	0	0	0	1	0	0	0	0	0	0	0	0.9	0.9	0.9	159.94	1613	1613	1	-2
E9Q8D0	ENSMUSG00000044224	78244	E9Q8D0	E9Q8D0	7	7	7	DnaJ heat shock protein family (Hsp40) member C21	Dnajc21	sp|E9Q8D0|DJC21_MOUSE DnaJ homolog subfamily C member 21 OS=Mus musculus OX=10090 GN=Dnajc21 PE=1 SV=1	1	7	7	7	1	1	1	6	1	3	2	3	4	1	1	1	6	1	3	2	3	4	1	1	1	6	1	3	2	3	4	19	19	19	61.734	531	531	0	40.213
G3UZF0	ENSMUSG00000032376	235441	G3UZF0;E9Q8W9;Q91W36	G3UZF0;E9Q8W9;Q91W36	3;3;3	3;3;3	3;3;3	Ubiquitin carboxyl-terminal hydrolase;Ubiquitin carboxyl-terminal hydrolase 3	Usp3	tr|G3UZF0|G3UZF0_MOUSE Ubiquitin carboxyl-terminal hydrolase OS=Mus musculus OX=10090 GN=Usp3 PE=1 SV=1;tr|E9Q8W9|E9Q8W9_MOUSE Ubiquitin carboxyl-terminal hydrolase OS=Mus musculus OX=10090 GN=Usp3 PE=1 SV=1;sp|Q91W36|UBP3_MOUSE Ubiquitin carboxyl-terminal	3	3	3	3	0	0	3	0	1	0	0	2	1	0	0	3	0	1	0	0	2	1	0	0	3	0	1	0	0	2	1	7.4	7.4	7.4	53.674	476	476;482;520	0	7.9066
E9Q9H2	ENSMUSG00000029014	22791	E9Q9H2;P54103;E9Q9H3;Q3TRX6	E9Q9H2;P54103;E9Q9H3	6;6;5;1	6;6;5;1	6;6;5;1	DnaJ homolog subfamily C member 2;DnaJ homolog subfamily C member 2, N-terminally processed	Dnajc2	tr|E9Q9H2|E9Q9H2_MOUSE DnaJ homolog subfamily C member 2 OS=Mus musculus OX=10090 GN=Dnajc2 PE=1 SV=1;sp|P54103|DNJC2_MOUSE DnaJ homolog subfamily C member 2 OS=Mus musculus OX=10090 GN=Dnajc2 PE=1 SV=2;tr|E9Q9H3|E9Q9H3_MOUSE DnaJ homolog subfamily C membe	4	6	6	6	2	0	1	2	2	0	1	1	4	2	0	1	2	2	0	1	1	4	2	0	1	2	2	0	1	1	4	13.3	13.3	13.3	63.44	547	547;621;619;191	0	13.199
Q6ZPL9	ENSMUSG00000029389	67848	Q6ZPL9;E9Q9T6;A0A0G2JG82	Q6ZPL9;E9Q9T6	5;5;2	5;5;2	5;5;2	ATP-dependent RNA helicase DDX55	Ddx55	sp|Q6ZPL9|DDX55_MOUSE ATP-dependent RNA helicase DDX55 OS=Mus musculus OX=10090 GN=Ddx55 PE=1 SV=2;tr|E9Q9T6|E9Q9T6_MOUSE RNA helicase OS=Mus musculus OX=10090 GN=Ddx55 PE=1 SV=1	3	5	5	5	1	1	0	2	2	1	0	2	1	1	1	0	2	2	1	0	2	1	1	1	0	2	2	1	0	2	1	12	12	12	68.464	600	600;596;135	0	12.752
E9QAD3	ENSMUSG00000029267	17765	E9QAD3;Q02395;Q02395-2;F6Q1Z6;E9Q8G7;E9PZQ6;E9PZE8;M0QWI3;E9Q5U4	E9QAD3;Q02395;Q02395-2;F6Q1Z6;E9Q8G7	7;7;5;4;4;2;2;2;2	7;7;5;4;4;2;2;2;2	7;7;5;4;4;2;2;2;2	Metal-response element-binding transcription factor 2	Mtf2	tr|E9QAD3|E9QAD3_MOUSE Metal-response element-binding transcription factor 2 OS=Mus musculus OX=10090 GN=Mtf2 PE=1 SV=1;sp|Q02395|MTF2_MOUSE Metal-response element-binding transcription factor 2 OS=Mus musculus OX=10090 GN=Mtf2 PE=1 SV=2;sp|Q02395-2|MTF2_M	9	7	7	7	2	2	3	4	2	5	3	4	5	2	2	3	4	2	5	3	4	5	2	2	3	4	2	5	3	4	5	14.2	14.2	14.2	60.495	536	536;593;491;239;282;81;118;129;162	0	17
E9QAG2	ENSMUSG00000025626	70998	E9QAG2;Q9D4J7-2;Q9D4J7	E9QAG2;Q9D4J7-2;Q9D4J7	2;2;2	2;2;2	2;2;2	PHD finger protein 6	Phf6	tr|E9QAG2|E9QAG2_MOUSE PHD finger protein 6 OS=Mus musculus OX=10090 GN=Phf6 PE=1 SV=1;sp|Q9D4J7-2|PHF6_MOUSE Isoform 2 of PHD finger protein 6 OS=Mus musculus OX=10090 GN=Phf6;sp|Q9D4J7|PHF6_MOUSE PHD finger protein 6 OS=Mus musculus OX=10090 GN=Phf6 PE=1	3	2	2	2	0	0	0	0	0	0	0	1	1	0	0	0	0	0	0	0	1	1	0	0	0	0	0	0	0	1	1	7.1	7.1	7.1	36.366	323	323;284;364	0.0020202	3.1939
E9QAS4	ENSMUSG00000063870	107932	E9QAS4;E9QAS5;Q6PDQ2;F6WR45;E9PYU4;E9PYL1;A2A8L1	E9QAS4;E9QAS5;Q6PDQ2	46;46;46;15;12;12;12	46;46;46;15;12;12;12	38;38;38;11;5;5;5	Chromodomain-helicase-DNA-binding protein 4	Chd4	tr|E9QAS4|E9QAS4_MOUSE DNA helicase OS=Mus musculus OX=10090 GN=Chd4 PE=1 SV=1;tr|E9QAS5|E9QAS5_MOUSE DNA helicase OS=Mus musculus OX=10090 GN=Chd4 PE=1 SV=1;sp|Q6PDQ2|CHD4_MOUSE Chromodomain-helicase-DNA-binding protein 4 OS=Mus musculus OX=10090 GN=Chd4	7	46	46	38	23	19	26	34	24	27	23	26	34	23	19	26	34	24	27	23	26	34	20	14	21	29	21	22	19	21	27	30.5	30.5	26	216.37	1902	1902;1922;1915;444;1915;1952;1946	0	215.6
P35922-3	ENSMUSG00000000838	14265	P35922-3;E9QAT0;Q6AXB7;P35922-9;P35922;P35922-2;P35922-7;E9QNF5;D3Z6U8;E9QAS9;E9QAS8;P35922-8;P35922-6;P35922-4;P35922-5;P35922-10;P35922-12;P35922-11	P35922-3;E9QAT0;Q6AXB7;P35922-9;P35922;P35922-2;P35922-7;E9QNF5;D3Z6U8;E9QAS9;E9QAS8;P35922-8;P35922-6;P35922-4;P35922-5;P35922-10;P35922-12;P35922-11	17;17;16;16;16;16;15;15;15;15;15;15;11;11;11;10;10;10	15;15;14;14;14;14;13;13;13;13;13;13;10;10;10;9;9;9	15;15;14;14;14;14;13;13;13;13;13;13;10;10;10;9;9;9	Fragile X mental retardation protein 1 homolog	Fmr1	sp|P35922-3|FMR1_MOUSE Isoform 3 of Synaptic functional regulator FMR1 OS=Mus musculus OX=10090 GN=Fmr1;tr|E9QAT0|E9QAT0_MOUSE Synaptic functional regulator FMR1 OS=Mus musculus OX=10090 GN=Fmr1 PE=1 SV=1;tr|Q6AXB7|Q6AXB7_MOUSE Synaptic functional regulato	18	17	15	15	7	6	7	9	8	12	8	10	10	6	4	6	7	7	10	6	8	8	6	4	6	7	7	10	6	8	8	41.8	37.2	37.2	66.269	589	589;589;614;568;614;602;593;593;591;585;631;581;512;448;436;427;491;415	0	223.01
Q68FL6	ENSMUSG00000040354	216443	Q68FL6;E9QB02;F6W0G8	Q68FL6;E9QB02	22;22;5	22;22;5	22;22;5	Methionine--tRNA ligase, cytoplasmic	Mars	sp|Q68FL6|SYMC_MOUSE Methionine--tRNA ligase, cytoplasmic OS=Mus musculus OX=10090 GN=Mars1 PE=1 SV=1;tr|E9QB02|E9QB02_MOUSE Methionine--tRNA ligase, cytoplasmic OS=Mus musculus OX=10090 GN=Mars1 PE=1 SV=1	3	22	22	22	16	15	13	15	15	14	14	16	18	16	15	13	15	15	14	14	16	18	16	15	13	15	15	14	14	16	18	29.8	29.8	29.8	101.43	902	902;910;184	0	240.86
E9QJS0	ENSMUSG00000034729	64657	E9QJS0;G5E8U8;G5E8U5;Q80ZK0;D3Z6K5	E9QJS0;G5E8U8;G5E8U5;Q80ZK0	3;3;3;3;1	3;3;3;3;1	3;3;3;3;1	28S ribosomal protein S10, mitochondrial	Mrps10	tr|E9QJS0|E9QJS0_MOUSE 28S ribosomal protein S10, mitochondrial OS=Mus musculus OX=10090 GN=Mrps10 PE=1 SV=1;tr|G5E8U8|G5E8U8_MOUSE 28S ribosomal protein S10, mitochondrial OS=Mus musculus OX=10090 GN=Mrps10 PE=1 SV=1;tr|G5E8U5|G5E8U5_MOUSE 28S ribosomal p	5	3	3	3	3	2	2	1	0	0	0	0	0	3	2	2	1	0	0	0	0	0	3	2	2	1	0	0	0	0	0	28.1	28.1	28.1	18.698	160	160;200;201;160;172	0	8.9937
F8WI26	ENSMUSG00000036779	214627	F8WI26;E9QJT6;Q68ED3;F6UPY1	F8WI26;E9QJT6;Q68ED3;F6UPY1	10;10;10;5	10;10;10;5	10;10;10;5	Non-canonical poly(A) RNA polymerase PAPD5	Papd5	tr|F8WI26|F8WI26_MOUSE Terminal nucleotidyltransferase 4B OS=Mus musculus OX=10090 GN=Tent4b PE=1 SV=1;tr|E9QJT6|E9QJT6_MOUSE Terminal nucleotidyltransferase 4B OS=Mus musculus OX=10090 GN=Tent4b PE=1 SV=1;sp|Q68ED3|PAPD5_MOUSE Terminal nucleotidyltransfer	4	10	10	10	7	2	5	8	6	2	4	6	6	7	2	5	8	6	2	4	6	6	7	2	5	8	6	2	4	6	6	22.4	22.4	22.4	69.365	637	637;680;633;200	0	37.604
E9QK83	ENSMUSG00000004356	70683	E9QK83;Q5XG71;A0A1W2P6J9;A0A1W2P7L8;A0A1W2P8D7	E9QK83;Q5XG71	21;21;2;2;1	21;21;2;2;1	21;21;2;2;1	Small subunit processome component 20 homolog	Utp20	tr|E9QK83|E9QK83_MOUSE Small subunit processome component 20 homolog OS=Mus musculus OX=10090 GN=Utp20 PE=1 SV=1;sp|Q5XG71|UTP20_MOUSE Small subunit processome component 20 homolog OS=Mus musculus OX=10090 GN=Utp20 PE=1 SV=2	5	21	21	21	4	3	3	10	4	8	4	6	9	4	3	3	10	4	8	4	6	9	4	3	3	10	4	8	4	6	9	9.1	9.1	9.1	317.87	2789	2789;2788;162;201;141	0	59.862
E9QK89	ENSMUSG00000061607	240087	E9QK89;Q5PSV9	E9QK89;Q5PSV9	3;3	3;3	3;3	Mediator of DNA damage checkpoint protein 1	Mdc1	tr|E9QK89|E9QK89_MOUSE Mediator of DNA damage checkpoint protein 1 OS=Mus musculus OX=10090 GN=Mdc1 PE=1 SV=1;sp|Q5PSV9|MDC1_MOUSE Mediator of DNA damage checkpoint protein 1 OS=Mus musculus OX=10090 GN=Mdc1 PE=1 SV=1	2	3	3	3	0	0	0	3	1	1	1	0	1	0	0	0	3	1	1	1	0	1	0	0	0	3	1	1	1	0	1	2.6	2.6	2.6	184.8	1708	1708;1707	0	7.8522
E9QKD1	ENSMUSG00000021392	70930	E9QKD1;Q3UHX0;A0A1Y7VNA8;A0A1Y7VN09;A0A1Y7VJP6;Q3UHX0-2	E9QKD1;Q3UHX0	13;12;4;4;3;1	13;12;4;4;3;1	13;12;4;4;3;1	Nucleolar protein 8	Nol8	tr|E9QKD1|E9QKD1_MOUSE Nucleolar protein 8 OS=Mus musculus OX=10090 GN=Nol8 PE=1 SV=1;sp|Q3UHX0|NOL8_MOUSE Nucleolar protein 8 OS=Mus musculus OX=10090 GN=Nol8 PE=1 SV=2	6	13	13	13	2	0	1	4	2	3	4	4	4	2	0	1	4	2	3	4	4	4	2	0	1	4	2	3	4	4	4	15.1	15.1	15.1	130.66	1165	1165;1147;145;225;93;299	0	36.44
F6V8M6	ENSMUSG00000042605	20239	F6V8M6;F6U2C2;E9QM77;O70305-3;O70305-2;O70305	F6V8M6;F6U2C2;E9QM77;O70305-3;O70305-2;O70305	1;1;1;1;1;1	1;1;1;1;1;1	1;1;1;1;1;1	Ataxin-2	Atxn2	tr|F6V8M6|F6V8M6_MOUSE Ataxin-2 (Fragment) OS=Mus musculus OX=10090 GN=Atxn2 PE=1 SV=2;tr|F6U2C2|F6U2C2_MOUSE Ataxin-2 (Fragment) OS=Mus musculus OX=10090 GN=Atxn2 PE=1 SV=1;tr|E9QM77|E9QM77_MOUSE Ataxin-2 OS=Mus musculus OX=10090 GN=Atxn2 PE=1 SV=1;sp|O70	6	1	1	1	1	0	1	0	0	0	0	0	0	1	0	1	0	0	0	0	0	0	1	0	1	0	0	0	0	0	0	2.6	2.6	2.6	70.471	662	662;929;1286;1154;1215;1285	0.0020229	3.1977
E9QMN5	ENSMUSG00000036180	234366	E9QMN5;Q8CHY6;A0A1I7Q4G8;A0A1D5RM58;A0A1D5RM07	E9QMN5;Q8CHY6;A0A1I7Q4G8	11;11;10;3;2	11;11;10;3;2	11;11;10;3;2	Transcriptional repressor p66 alpha	Gatad2a	tr|E9QMN5|E9QMN5_MOUSE Transcriptional repressor p66 alpha OS=Mus musculus OX=10090 GN=Gatad2a PE=1 SV=1;sp|Q8CHY6|P66A_MOUSE Transcriptional repressor p66 alpha OS=Mus musculus OX=10090 GN=Gatad2a PE=1 SV=2;tr|A0A1I7Q4G8|A0A1I7Q4G8_MOUSE Transcriptional r	5	11	11	11	6	5	6	9	5	6	5	5	7	6	5	6	9	5	6	5	5	7	6	5	6	9	5	6	5	5	7	25.4	25.4	25.4	67.461	630	630;629;614;161;99	0	38.156
E9QN31	ENSMUSG00000038279	110109	E9QN31;A0A0N4SW16	E9QN31	24;4	24;4	2;0	NOP2 nucleolar protein	Nop2	tr|E9QN31|E9QN31_MOUSE Probable 28S rRNA (cytosine-C(5))-methyltransferase OS=Mus musculus OX=10090 GN=Nop2 PE=1 SV=1	2	24	24	2	21	21	21	21	21	20	21	20	20	21	21	21	21	21	20	21	20	20	2	2	2	2	2	2	2	2	2	33.8	33.8	2.5	86.906	794	794;133	0	313.17
E9QNN1	ENSMUSG00000042699	13211	E9QNN1;O70133-2;Q3UR42	E9QNN1;O70133-2;Q3UR42	46;44;27	46;44;27	1;1;1	ATP-dependent RNA helicase A	Dhx9	tr|E9QNN1|E9QNN1_MOUSE DEAH box protein 9 OS=Mus musculus OX=10090 GN=Dhx9 PE=1 SV=1;sp|O70133-2|DHX9_MOUSE Isoform 2 of ATP-dependent RNA helicase A OS=Mus musculus OX=10090 GN=Dhx9;tr|Q3UR42|Q3UR42_MOUSE DEAH box protein 9 (Fragment) OS=Mus musculus OX=1	3	46	46	1	39	36	39	37	33	35	36	36	35	39	36	39	37	33	35	36	36	35	1	1	1	1	1	1	1	1	1	42.3	42.3	1.7	149.69	1384	1384;1381;735	0	323.31
F8WJ23	ENSMUSG00000041991	68723	F8WJ23;E9QNP3;Q8VHD8	F8WJ23;E9QNP3;Q8VHD8	6;6;6	6;6;6	6;6;6	Hornerin	Hrnr	tr|F8WJ23|F8WJ23_MOUSE Hornerin OS=Mus musculus OX=10090 GN=Hrnr PE=1 SV=1;tr|E9QNP3|E9QNP3_MOUSE Hornerin OS=Mus musculus OX=10090 GN=Hrnr PE=1 SV=1;sp|Q8VHD8|HORN_MOUSE Hornerin OS=Mus musculus OX=10090 GN=Hrnr PE=1 SV=1	3	6	6	6	0	4	4	6	2	0	0	0	0	0	4	4	6	2	0	0	0	0	0	4	4	6	2	0	0	0	0	21	21	21	340.66	3411	3411;3234;2496	0	188.98
E9QPD7	ENSMUSG00000024892	18563	E9QPD7;G5E8R3;Q05920	E9QPD7;G5E8R3;Q05920	1;1;1	1;1;1	1;1;1	Pyruvate carboxylase;Pyruvate carboxylase, mitochondrial	Pcx;Pc	tr|E9QPD7|E9QPD7_MOUSE Pyruvate carboxylase OS=Mus musculus OX=10090 GN=Pcx PE=1 SV=1;tr|G5E8R3|G5E8R3_MOUSE Pyruvate carboxylase OS=Mus musculus OX=10090 GN=Pcx PE=1 SV=1;sp|Q05920|PYC_MOUSE Pyruvate carboxylase, mitochondrial OS=Mus musculus OX=10090 GN=	3	1	1	1	0	0	1	0	0	0	0	0	1	0	0	1	0	0	0	0	0	1	0	0	1	0	0	0	0	0	1	1.2	1.2	1.2	129.83	1179	1179;1178;1178	0	6.1952
F6QC68	ENSMUSG00000004451	64143	F6QC68;Q9JIW9	F6QC68;Q9JIW9	1;1	1;1	1;1	Ras-related protein Ral-B	Ralb	tr|F6QC68|F6QC68_MOUSE Small monomeric GTPase (Fragment) OS=Mus musculus OX=10090 GN=Ralb PE=1 SV=2;sp|Q9JIW9|RALB_MOUSE Ras-related protein Ral-B OS=Mus musculus OX=10090 GN=Ralb PE=1 SV=1	2	1	1	1	0	1	0	0	0	0	0	0	0	0	1	0	0	0	0	0	0	0	0	1	0	0	0	0	0	0	0	9.4	9.4	9.4	16.684	149	149;206	0.0019711	2.9537
F6QYF8	ENSMUSG00000001441	19155	F6QYF8;Q11011;E9Q039;E9Q6F4;F6V7K3;F7ANF4	F6QYF8;Q11011;E9Q039;E9Q6F4	8;8;6;5;3;1	8;8;6;5;3;1	8;8;6;5;3;1	Puromycin-sensitive aminopeptidase	Npepps	tr|F6QYF8|F6QYF8_MOUSE Aminopeptidase (Fragment) OS=Mus musculus OX=10090 GN=Npepps PE=1 SV=1;sp|Q11011|PSA_MOUSE Puromycin-sensitive aminopeptidase OS=Mus musculus OX=10090 GN=Npepps PE=1 SV=2;tr|E9Q039|E9Q039_MOUSE Aminopeptidase OS=Mus musculus OX=10090	6	8	8	8	0	8	0	0	0	0	0	0	0	0	8	0	0	0	0	0	0	0	0	8	0	0	0	0	0	0	0	11	11	11	98.409	876	876;920;889;674;247;218	0	22.834
F6RJ39	ENSMUSG00000022185	56215	F6RJ39;Q9JIX8-4;Q9JIX8;Q52KR6;B8JJ92;B8JJ91;Q9JIX8-3;Q9JIX8-2;B8JJ90;B8JJ89	F6RJ39;Q9JIX8-4;Q9JIX8;Q52KR6;B8JJ92;B8JJ91;Q9JIX8-3;Q9JIX8-2	10;10;10;6;6;6;6;6;2;1	10;10;10;6;6;6;6;6;2;1	10;10;10;6;6;6;6;6;2;1	Apoptotic chromatin condensation inducer in the nucleus	Acin1	tr|F6RJ39|F6RJ39_MOUSE Apoptotic chromatin condensation inducer in the nucleus (Fragment) OS=Mus musculus OX=10090 GN=Acin1 PE=1 SV=1;sp|Q9JIX8-4|ACINU_MOUSE Isoform 4 of Apoptotic chromatin condensation inducer in the nucleus OS=Mus musculus OX=10090 GN=A	10	10	10	10	5	3	3	2	0	7	2	3	6	5	3	3	2	0	7	2	3	6	5	3	3	2	0	7	2	3	6	11.2	11.2	11.2	143.54	1272	1272;1298;1338;552;580;634;565;581;221;256	0	66.156
V9GXJ9	ENSMUSG00000035047	215194	V9GXJ9;F6WIU1;Q8VDQ9	V9GXJ9;F6WIU1;Q8VDQ9	11;11;9	11;11;9	11;11;9	Protein KRI1 homolog	Kri1	tr|V9GXJ9|V9GXJ9_MOUSE Protein KRI1 homolog OS=Mus musculus OX=10090 GN=Kri1 PE=1 SV=1;tr|F6WIU1|F6WIU1_MOUSE Protein KRI1 homolog OS=Mus musculus OX=10090 GN=Kri1 PE=1 SV=2;sp|Q8VDQ9|KRI1_MOUSE Protein KRI1 homolog OS=Mus musculus OX=10090 GN=Kri1 PE=1 SV	3	11	11	11	3	3	4	7	5	6	4	6	3	3	3	4	7	5	6	4	6	3	3	3	4	7	5	6	4	6	3	25.7	25.7	25.7	68.631	587	587;705;704	0	34.654
F6YVP7	ENSMUSG00000069117	100039740	F6YVP7;P62270;S4R1N6;A0A1Y7VKY1;A0A3Q4EGP3	F6YVP7;P62270;S4R1N6;A0A1Y7VKY1	7;7;6;6;2	7;7;6;6;2	7;7;6;6;2	40S ribosomal protein S18	Gm10260;Rps18	tr|F6YVP7|F6YVP7_MOUSE 40S ribosomal protein S18 OS=Mus musculus OX=10090 GN=Rps18-ps6 PE=3 SV=2;sp|P62270|RS18_MOUSE 40S ribosomal protein S18 OS=Mus musculus OX=10090 GN=Rps18 PE=1 SV=3;tr|S4R1N6|S4R1N6_MOUSE 40S ribosomal protein S18 OS=Mus musculus OX=	5	7	7	7	4	5	3	6	4	5	5	4	5	4	5	3	6	4	5	5	4	5	4	5	3	6	4	5	5	4	5	40.8	40.8	40.8	17.671	152	152;152;107;152;38	0	23.426
F6ZV59	ENSMUSG00000000568	11991	F6ZV59;G5E8G0;G3X9W0;Q60668-4;Q60668-3;Q60668-2;Q60668;E9Q5B6;F6SHF3;A0A0G2JFL4;F7A465	F6ZV59;G5E8G0;G3X9W0;Q60668-4;Q60668-3;Q60668-2;Q60668;E9Q5B6;F6SHF3	6;6;6;6;6;6;6;4;3;1;1	6;6;6;6;6;6;6;4;3;1;1	6;6;6;6;6;6;6;4;3;1;1	Heterogeneous nuclear ribonucleoprotein D0	Hnrnpd	tr|F6ZV59|F6ZV59_MOUSE Heterogeneous nuclear ribonucleoprotein D0 (Fragment) OS=Mus musculus OX=10090 GN=Hnrnpd PE=1 SV=1;tr|G5E8G0|G5E8G0_MOUSE Heterogeneous nuclear ribonucleoprotein D0 OS=Mus musculus OX=10090 GN=Hnrnpd PE=1 SV=1;tr|G3X9W0|G3X9W0_MOUSE	11	6	6	6	3	5	4	3	2	4	3	3	3	3	5	4	3	2	4	3	3	3	3	5	4	3	2	4	3	3	3	27.3	27.3	27.3	24.611	216	216;287;336;287;306;336;355;107;150;25;131	0	18.564
F7ALS6	ENSMUSG00000025190	14718	F7ALS6;P05201	F7ALS6;P05201	1;1	1;1	1;1	Aspartate aminotransferase, cytoplasmic	Got1	tr|F7ALS6|F7ALS6_MOUSE Aspartate transaminase (Fragment) OS=Mus musculus OX=10090 GN=Got1 PE=1 SV=1;sp|P05201|AATC_MOUSE Aspartate aminotransferase, cytoplasmic OS=Mus musculus OX=10090 GN=Got1 PE=1 SV=3	2	1	1	1	0	1	0	0	0	0	0	0	0	0	1	0	0	0	0	0	0	0	0	1	0	0	0	0	0	0	0	7.7	7.7	7.7	20.267	182	182;413	0.001975	2.9738
F7BGR7	ENSMUSG00000096370	102902673	F7BGR7;Q8C7Q4;F6TBN8;A0A494BAP6;Q5CZX8;S4R1A6;A0A494B9C0;A0A494BB78;B0LM42;Q8C7Q4-2	F7BGR7;Q8C7Q4;F6TBN8	13;10;8;6;6;6;6;6;6;6	10;10;8;6;6;6;6;6;3;6	2;2;0;0;0;0;0;0;2;0	RNA-binding protein 4	Gm21992;Rbm4	tr|F7BGR7|F7BGR7_MOUSE Predicted gene 21992 OS=Mus musculus OX=10090 GN=Gm21992 PE=4 SV=1;sp|Q8C7Q4|RBM4_MOUSE RNA-binding protein 4 OS=Mus musculus OX=10090 GN=Rbm4 PE=1 SV=1;tr|F6TBN8|F6TBN8_MOUSE RNA-binding protein 4 (Fragment) OS=Mus musculus OX=10090	10	13	10	2	5	4	7	3	3	5	8	8	9	2	2	4	1	2	3	5	5	6	0	1	0	1	0	0	1	0	2	35.8	27.9	9.2	52.791	477	477;361;172;142;143;152;154;229;336;168	0	34.089
F7BJB9	ENSMUSG00000039456	338467	F7BJB9;A0A0J9YU83;A0A338P7B1;A0A0J9YUV3	F7BJB9	7;2;1;1	7;2;1;1	7;2;1;1	microrchidia 3	Morc3	sp|F7BJB9|MORC3_MOUSE MORC family CW-type zinc finger protein 3 OS=Mus musculus OX=10090 GN=Morc3 PE=1 SV=1	4	7	7	7	0	0	1	1	1	0	1	2	4	0	0	1	1	1	0	1	2	4	0	0	1	1	1	0	1	2	4	13.9	13.9	13.9	106.52	942	942;397;58;92	0	13.193
F7BTP0	ENSMUSG00000026162	75570	F7BTP0;Q3KNJ2	F7BTP0;Q3KNJ2	1;1	1;1	1;1	Non-homologous end-joining factor 1	Nhej1	tr|F7BTP0|F7BTP0_MOUSE Non-homologous end-joining factor 1 (Fragment) OS=Mus musculus OX=10090 GN=Nhej1 PE=1 SV=1;sp|Q3KNJ2|NHEJ1_MOUSE Non-homologous end-joining factor 1 OS=Mus musculus OX=10090 GN=Nhej1 PE=1 SV=1	2	1	1	1	0	1	0	0	0	0	0	0	0	0	1	0	0	0	0	0	0	0	0	1	0	0	0	0	0	0	0	4.2	4.2	4.2	18.159	165	165;295	0.0057179	2.6769
F7CD45	ENSMUSG00000079374	666864	F7CD45	F7CD45	5	5	5	predicted gene 8334	Gm8334	tr|F7CD45|F7CD45_MOUSE Predicted gene 8334 OS=Mus musculus OX=10090 GN=Gm8334 PE=4 SV=1	1	5	5	5	4	2	2	3	5	3	3	4	4	4	2	2	3	5	3	3	4	4	4	2	2	3	5	3	3	4	4	11.9	11.9	11.9	57.321	553	553	0	23.801
F7CFA5	ENSMUSG00000021794	14661	F7CFA5;P26443	F7CFA5;P26443	1;1	1;1	1;1	Glutamate dehydrogenase 1, mitochondrial	Glud1	tr|F7CFA5|F7CFA5_MOUSE Glutamate dehydrogenase 1, mitochondrial (Fragment) OS=Mus musculus OX=10090 GN=Glud1 PE=1 SV=1;sp|P26443|DHE3_MOUSE Glutamate dehydrogenase 1, mitochondrial OS=Mus musculus OX=10090 GN=Glud1 PE=1 SV=1	2	1	1	1	0	1	0	0	0	0	0	0	0	0	1	0	0	0	0	0	0	0	0	1	0	0	0	0	0	0	0	11.1	11.1	11.1	15.383	144	144;558	0	5.0764
Q3TML0	ENSMUSG00000020571	71853	Q3TML0;F7DBQ0;Q922R8	Q3TML0;F7DBQ0;Q922R8	1;1;1	1;1;1	1;1;1	Protein disulfide-isomerase A6	Pdia6	tr|Q3TML0|Q3TML0_MOUSE Protein disulfide-isomerase A6 OS=Mus musculus OX=10090 GN=Pdia6 PE=1 SV=1;tr|F7DBQ0|F7DBQ0_MOUSE Protein disulfide-isomerase A6 OS=Mus musculus OX=10090 GN=Pdia6 PE=1 SV=1;sp|Q922R8|PDIA6_MOUSE Protein disulfide-isomerase A6 OS=Mus	3	1	1	1	0	1	0	0	0	0	0	0	0	0	1	0	0	0	0	0	0	0	0	1	0	0	0	0	0	0	0	3.1	3.1	3.1	48.689	445	445;440;440	0.002008	3.1512
F8VPX1	ENSMUSG00000022710	252870	F8VPX1;Q6A4J8-3;Q6A4J8;E9PXY8;Q6A4J8-2;G3UWR8;E0CY04	F8VPX1;Q6A4J8-3;Q6A4J8;E9PXY8;Q6A4J8-2	29;29;29;28;28;6;2	29;29;29;28;28;6;2	29;29;29;28;28;6;2	Ubiquitin carboxyl-terminal hydrolase;Ubiquitin carboxyl-terminal hydrolase 7	Usp7	tr|F8VPX1|F8VPX1_MOUSE Ubiquitin carboxyl-terminal hydrolase 7 OS=Mus musculus OX=10090 GN=Usp7 PE=1 SV=1;sp|Q6A4J8-3|UBP7_MOUSE Isoform 3 of Ubiquitin carboxyl-terminal hydrolase 7 OS=Mus musculus OX=10090 GN=Usp7;sp|Q6A4J8|UBP7_MOUSE Ubiquitin carboxyl-t	7	29	29	29	10	11	14	16	14	16	15	16	18	10	11	14	16	14	16	15	16	18	10	11	14	16	14	16	15	16	18	30.5	30.5	30.5	128.47	1103	1103;1100;1103;1143;1143;327;92	0	124.86
F8VQ54	ENSMUSG00000041415	192119	F8VQ54;Q8R418;Q8R418-2;A0A1Y7VJD6	F8VQ54;Q8R418;Q8R418-2	15;14;13;3	15;14;13;3	15;14;13;3	Endoribonuclease Dicer	Dicer1	tr|F8VQ54|F8VQ54_MOUSE Endoribonuclease Dicer OS=Mus musculus OX=10090 GN=Dicer1 PE=1 SV=1;sp|Q8R418|DICER_MOUSE Endoribonuclease Dicer OS=Mus musculus OX=10090 GN=Dicer1 PE=1 SV=3;sp|Q8R418-2|DICER_MOUSE Isoform 2 of Endoribonuclease Dicer OS=Mus musculus	4	15	15	15	3	3	5	4	6	6	5	6	9	3	3	5	4	6	6	5	6	9	3	3	5	4	6	6	5	6	9	9.4	9.4	9.4	215.77	1906	1906;1916;1678;411	0	33.638
F8VQ93	ENSMUSG00000032253	83946	F8VQ93;Q8VDD9	F8VQ93;Q8VDD9	1;1	1;1	1;1	PH-interacting protein	Phip	tr|F8VQ93|F8VQ93_MOUSE PH-interacting protein OS=Mus musculus OX=10090 GN=Phip PE=1 SV=1;sp|Q8VDD9|PHIP_MOUSE PH-interacting protein OS=Mus musculus OX=10090 GN=Phip PE=1 SV=2	2	1	1	1	1	0	1	1	1	1	1	1	1	1	0	1	1	1	1	1	1	1	1	0	1	1	1	1	1	1	1	1	1	1	206.72	1821	1821;1821	0.0032404	2.8555
F8VQC1	ENSMUSG00000036323	66661	F8VQC1;E9Q740	F8VQC1;E9Q740	22;20	22;20	22;20	Signal recognition particle subunit SRP72	Srp72	tr|F8VQC1|F8VQC1_MOUSE Signal recognition particle subunit SRP72 OS=Mus musculus OX=10090 GN=Srp72 PE=1 SV=1;tr|E9Q740|E9Q740_MOUSE Signal recognition particle subunit SRP72 OS=Mus musculus OX=10090 GN=Srp72 PE=1 SV=1	2	22	22	22	17	17	16	16	18	16	15	17	20	17	17	16	16	18	16	15	17	20	17	17	16	16	18	16	15	17	20	42.5	42.5	42.5	74.656	671	671;610	0	266.25
Q31093	ENSMUSG00000016206	14991	Q31093;F8VQG4	Q31093;F8VQG4	1;1	1;1	1;1	histocompatibility 2, M region locus 3	H2-M3;H2-T24	tr|Q31093|Q31093_MOUSE Histocompatibility 2, M region locus 3 OS=Mus musculus OX=10090 GN=H2-M3 PE=1 SV=1;tr|F8VQG4|F8VQG4_MOUSE Histocompatibility 2, T region locus 24 OS=Mus musculus OX=10090 GN=H2-T24 PE=1 SV=1	2	1	1	1	0	1	0	0	0	0	0	0	0	0	1	0	0	0	0	0	0	0	0	1	0	0	0	0	0	0	0	3.9	3.9	3.9	37.856	336	336;363	0.0044901	2.7829
F8WGL3	ENSMUSG00000056201	12631	F8WGL3;P18760;A0A494B9A7	F8WGL3;P18760;A0A494B9A7	6;6;5	6;6;5	5;5;4	Cofilin-1	Cfl1	tr|F8WGL3|F8WGL3_MOUSE Cofilin, non-muscle isoform OS=Mus musculus OX=10090 GN=Cfl1 PE=1 SV=1;sp|P18760|COF1_MOUSE Cofilin-1 OS=Mus musculus OX=10090 GN=Cfl1 PE=1 SV=3;tr|A0A494B9A7|A0A494B9A7_MOUSE Cofilin, non-muscle isoform OS=Mus musculus OX=10090 GN=C	3	6	6	5	4	6	3	2	1	1	3	3	3	4	6	3	2	1	1	3	3	3	3	5	2	2	1	1	2	2	3	32.6	32.6	27.8	24.576	227	227;166;178	0	162.95
F8WGW3	ENSMUSG00000024135	78586	F8WGW3;Q497V5;Q497V5-2;Q8CHZ0;B7ZWI4;B7ZWI7	F8WGW3;Q497V5;Q497V5-2	35;34;23;12;8;7	35;34;23;12;8;7	35;34;23;12;8;7	S1 RNA-binding domain-containing protein 1	Srbd1	tr|F8WGW3|F8WGW3_MOUSE S1 RNA-binding domain-containing protein 1 OS=Mus musculus OX=10090 GN=Srbd1 PE=1 SV=1;sp|Q497V5|SRBD1_MOUSE S1 RNA-binding domain-containing protein 1 OS=Mus musculus OX=10090 GN=Srbd1 PE=2 SV=3;sp|Q497V5-2|SRBD1_MOUSE Isoform 2 of	6	35	35	35	22	19	21	28	25	25	22	23	22	22	19	21	28	25	25	22	23	22	22	19	21	28	25	25	22	23	22	44.9	44.9	44.9	110.19	981	981;982;611;280;195;170	0	228.66
Q8CIE6	ENSMUSG00000026553	12847	Q8CIE6;F8WHL2;F6XJN3	Q8CIE6;F8WHL2	11;11;2	11;11;2	11;11;2	Coatomer subunit alpha;Xenin;Proxenin;Coatomer subunit alpha	Copa	sp|Q8CIE6|COPA_MOUSE Coatomer subunit alpha OS=Mus musculus OX=10090 GN=Copa PE=1 SV=2;tr|F8WHL2|F8WHL2_MOUSE Coatomer subunit alpha OS=Mus musculus OX=10090 GN=Copa PE=1 SV=1	3	11	11	11	2	5	4	4	2	3	3	3	5	2	5	4	4	2	3	3	3	5	2	5	4	4	2	3	3	3	5	10.5	10.5	10.5	138.43	1224	1224;1233;143	0	23.986
F8WHU5	ENSMUSG00000034021	100710	F8WHU5;Q4VA53;Q4VA53-3;Q4VA53-2;E9QPI5;Q6A026	F8WHU5;Q4VA53;Q4VA53-3;Q4VA53-2	14;14;14;10;1;1	14;14;14;10;1;1	14;14;14;10;1;1	Sister chromatid cohesion protein PDS5 homolog B	Pds5b	tr|F8WHU5|F8WHU5_MOUSE Sister chromatid cohesion protein PDS5 homolog B OS=Mus musculus OX=10090 GN=Pds5b PE=1 SV=1;sp|Q4VA53|PDS5B_MOUSE Sister chromatid cohesion protein PDS5 homolog B OS=Mus musculus OX=10090 GN=Pds5b PE=1 SV=1;sp|Q4VA53-3|PDS5B_MOUSE I	6	14	14	14	5	3	8	7	6	7	4	5	8	5	3	8	7	6	7	4	5	8	5	3	8	7	6	7	4	5	8	12.2	12.2	12.2	164.76	1449	1449;1446;1448;701;1332;1332	0	44.137
F8WHY8	ENSMUSG00000021144	116870	F8WHY8;E9PX23;Q8K4B0	F8WHY8;E9PX23;Q8K4B0	12;11;11	10;9;9	8;7;7	Metastasis-associated protein MTA1	Mta1	tr|F8WHY8|F8WHY8_MOUSE Metastasis-associated protein MTA1 OS=Mus musculus OX=10090 GN=Mta1 PE=1 SV=1;tr|E9PX23|E9PX23_MOUSE Metastasis-associated protein MTA1 OS=Mus musculus OX=10090 GN=Mta1 PE=1 SV=1;sp|Q8K4B0|MTA1_MOUSE Metastasis-associated protein MTA	3	12	10	8	5	3	9	7	7	4	7	7	5	4	2	8	5	6	3	5	5	4	3	2	6	3	5	2	3	3	2	22.8	19.5	15.6	79.189	698	698;703;715	0	32.991
G3UZZ3	ENSMUSG00000033335	13430	G3UZZ3;Q3T9X3;Q3TCR7;G3X9G4;F8WIV5;P39054-2;P39054	G3UZZ3;Q3T9X3;Q3TCR7;G3X9G4;F8WIV5;P39054-2;P39054	1;1;1;1;1;1;1	1;1;1;1;1;1;1	1;1;1;1;1;1;1	Dynamin-2	Dnm2	tr|G3UZZ3|G3UZZ3_MOUSE Dynamin GTPase (Fragment) OS=Mus musculus OX=10090 GN=Dnm2 PE=1 SV=1;tr|Q3T9X3|Q3T9X3_MOUSE Dynamin GTPase OS=Mus musculus OX=10090 GN=Dnm2 PE=1 SV=1;tr|Q3TCR7|Q3TCR7_MOUSE Dynamin GTPase OS=Mus musculus OX=10090 GN=Dnm2 PE=1 SV=1;tr	7	1	1	1	0	1	0	0	0	0	0	0	0	0	1	0	0	0	0	0	0	0	0	1	0	0	0	0	0	0	0	1.9	1.9	1.9	91.56	807	807;860;869;870;870;866;870	0.0013976	3.6338
F8WJ40	ENSMUSG00000006307	75410	F8WJ40;O08550	F8WJ40;O08550	1;1	1;1	1;1	Histone-lysine N-methyltransferase;Histone-lysine N-methyltransferase 2B	Kmt2b	tr|F8WJ40|F8WJ40_MOUSE Histone-lysine N-methyltransferase OS=Mus musculus OX=10090 GN=Kmt2b PE=1 SV=1;sp|O08550|KMT2B_MOUSE Histone-lysine N-methyltransferase 2B OS=Mus musculus OX=10090 GN=Kmt2b PE=1 SV=3	2	1	1	1	0	1	0	0	1	0	1	0	0	0	1	0	0	1	0	1	0	0	0	1	0	0	1	0	1	0	0	0.7	0.7	0.7	295.76	2721	2721;2713	0.0097383	2.4008
F8WJ41	ENSMUSG00000008683	267019	F8WJ41;P62245;D3Z712;D3YVB4	F8WJ41;P62245;D3Z712;D3YVB4	5;5;4;3	5;5;4;3	5;5;4;3	40S ribosomal protein S15a	Rps15a	tr|F8WJ41|F8WJ41_MOUSE 40S ribosomal protein S15a (Fragment) OS=Mus musculus OX=10090 GN=Rps15a PE=1 SV=1;sp|P62245|RS15A_MOUSE 40S ribosomal protein S15a OS=Mus musculus OX=10090 GN=Rps15a PE=1 SV=2;tr|D3Z712|D3Z712_MOUSE 40S ribosomal protein S15a (Fragm	4	5	5	5	5	4	4	5	5	4	4	3	4	5	4	4	5	5	4	4	3	4	5	4	4	5	5	4	4	3	4	43.5	43.5	43.5	12.31	108	108;130;78;71	0	41.473
F8WJA0	ENSMUSG00000041645	27225	F8WJA0;Q9ESV0;A0A1Y7VKX7;A0A1Y7VLU4;A0A1Y7VK75;A0A1Y7VMS6	F8WJA0;Q9ESV0;A0A1Y7VKX7	29;29;26;5;5;2	29;29;26;5;5;2	29;29;26;5;5;2	ATP-dependent RNA helicase DDX24	Ddx24	tr|F8WJA0|F8WJA0_MOUSE RNA helicase OS=Mus musculus OX=10090 GN=Ddx24 PE=1 SV=1;sp|Q9ESV0|DDX24_MOUSE ATP-dependent RNA helicase DDX24 OS=Mus musculus OX=10090 GN=Ddx24 PE=1 SV=2;tr|A0A1Y7VKX7|A0A1Y7VKX7_MOUSE RNA helicase OS=Mus musculus OX=10090 GN=Ddx24	6	29	29	29	19	13	17	23	22	18	20	20	24	19	13	17	23	22	18	20	20	24	19	13	17	23	22	18	20	20	24	35	35	35	101.37	903	903;857;791;119;176;119	0	323.31
Q99L47	ENSMUSG00000022403	70356	Q99L47;F8WJK8;E9Q1V0	Q99L47;F8WJK8;E9Q1V0	2;2;1	2;2;1	2;2;1	Hsc70-interacting protein	St13	sp|Q99L47|F10A1_MOUSE Hsc70-interacting protein OS=Mus musculus OX=10090 GN=St13 PE=1 SV=1;tr|F8WJK8|F8WJK8_MOUSE Hsc70-interacting protein OS=Mus musculus OX=10090 GN=St13 PE=1 SV=1;tr|E9Q1V0|E9Q1V0_MOUSE Hsc70-interacting protein (Fragment) OS=Mus muscul	3	2	2	2	0	2	0	0	0	0	0	0	0	0	2	0	0	0	0	0	0	0	0	2	0	0	0	0	0	0	0	6.2	6.2	6.2	41.655	371	371;362;129	0	4.9694
G3UVV4	ENSMUSG00000037012	15275	G3UVV4;P17710-3;P17710-4;P17710-2;P17710;D3YYR4;D3Z365	G3UVV4;P17710-3;P17710-4;P17710-2;P17710	5;5;5;5;5;2;2	5;5;5;5;5;2;2	5;5;5;5;5;2;2	Hexokinase;Hexokinase-1	Hk1	tr|G3UVV4|G3UVV4_MOUSE Hexokinase OS=Mus musculus OX=10090 GN=Hk1 PE=1 SV=1;sp|P17710-3|HXK1_MOUSE Isoform HK1 of Hexokinase-1 OS=Mus musculus OX=10090 GN=Hk1;sp|P17710-4|HXK1_MOUSE Isoform HK1-SC of Hexokinase-1 OS=Mus musculus OX=10090 GN=Hk1;sp|P17710-2	7	5	5	5	0	5	0	0	0	0	0	0	0	0	5	0	0	0	0	0	0	0	0	5	0	0	0	0	0	0	0	6	6	6	101.87	917	917;918;922;945;974;184;223	0	11.301
G3UW82	ENSMUSG00000033196	17882	G3UW82;E9Q264	G3UW82	57;4	2;0	2;0	myosin, heavy polypeptide 2, skeletal muscle, adult	Myh2	tr|G3UW82|G3UW82_MOUSE Myosin, heavy polypeptide 2, skeletal muscle, adult OS=Mus musculus OX=10090 GN=Myh2 PE=1 SV=1	2	57	2	2	55	0	0	0	0	0	0	32	0	2	0	0	0	0	0	0	1	0	2	0	0	0	0	0	0	1	0	32.1	1.5	1.5	223.22	1942	1942;1925	0	11.047
G3UZ60	ENSMUSG00000112241		G3UZ60;G3UWI9;G3UWX9;G3UZA7;Q9Z172-2;Q9Z172	G3UZ60;G3UWI9;G3UWX9;G3UZA7;Q9Z172-2;Q9Z172	2;2;2;2;2;2	1;1;1;1;1;1	1;1;1;1;1;1	Small ubiquitin-related modifier;Small ubiquitin-related modifier 3	Sumo3	tr|G3UZ60|G3UZ60_MOUSE Predicted gene, 49325 OS=Mus musculus OX=10090 GN=Gm49325 PE=4 SV=1;tr|G3UWI9|G3UWI9_MOUSE Small ubiquitin-related modifier 3 OS=Mus musculus OX=10090 GN=Sumo3 PE=4 SV=1;tr|G3UWX9|G3UWX9_MOUSE Small ubiquitin-related modifier 3 OS=Mu	6	2	1	1	2	1	2	2	2	1	1	1	2	1	0	1	1	1	0	0	0	1	1	0	1	1	1	0	0	0	1	28	12	12	8.6017	75	75;82;96;113;110;110	0.0014094	3.7643
H3BIV7	ENSMUSG00000032058	73699	H3BIV7;H3BLQ0;Q3TTF6;H3BKU1;G3UWS4;Q7TNP2;G3UXQ1;H3BJ83;H3BLE7;H3BK50	H3BIV7;H3BLQ0;Q3TTF6;H3BKU1;G3UWS4;Q7TNP2;G3UXQ1;H3BJ83;H3BLE7	4;4;4;4;4;4;2;2;2;1	1;1;1;1;1;1;0;0;1;0	1;1;1;1;1;1;0;0;1;0	Serine/threonine-protein phosphatase 2A 65 kDa regulatory subunit A beta isoform	Ppp2r1b;Ppp2r1a	tr|H3BIV7|H3BIV7_MOUSE Serine/threonine-protein phosphatase 2A 65 kDa regulatory subunit A beta isoform OS=Mus musculus OX=10090 GN=Ppp2r1b PE=1 SV=1;tr|H3BLQ0|H3BLQ0_MOUSE Serine/threonine-protein phosphatase 2A 65 kDa regulatory subunit A beta isoform OS	10	4	1	1	2	4	2	3	0	1	2	2	2	1	1	1	1	0	1	1	1	1	1	1	1	1	0	1	1	1	1	12	4.2	4.2	51.937	474	474;556;658;667;694;601;88;135;603;93	0	5.2759
G3UX26	ENSMUSG00000021771	22334	G3UX26;Q60930;D3YZT5;A0A286YCR8	G3UX26;Q60930	3;3;1;1	3;3;1;1	3;3;1;1	Voltage-dependent anion-selective channel protein 2	Vdac2	tr|G3UX26|G3UX26_MOUSE Outer mitochondrial membrane protein porin 2 OS=Mus musculus OX=10090 GN=Vdac2 PE=1 SV=1;sp|Q60930|VDAC2_MOUSE Voltage-dependent anion-selective channel protein 2 OS=Mus musculus OX=10090 GN=Vdac2 PE=1 SV=2	4	3	3	3	0	3	0	0	0	0	0	1	0	0	3	0	0	0	0	0	1	0	0	3	0	0	0	0	0	1	0	12.4	12.4	12.4	30.446	283	283;295;201;246	0	9.7279
G3UX48	ENSMUSG00000024393	53761	G3UX48;Q7TSC1	G3UX48;Q7TSC1	27;27	27;27	27;27	Protein PRRC2A	Prrc2a	tr|G3UX48|G3UX48_MOUSE Protein PRRC2A OS=Mus musculus OX=10090 GN=Prrc2a PE=1 SV=1;sp|Q7TSC1|PRC2A_MOUSE Protein PRRC2A OS=Mus musculus OX=10090 GN=Prrc2a PE=1 SV=1	2	27	27	27	15	9	12	17	15	11	9	12	13	15	9	12	17	15	11	9	12	13	15	9	12	17	15	11	9	12	13	20.3	20.3	20.3	219.46	2069	2069;2158	0	91.768
G8JL74	ENSMUSG00000028382	230257	G8JL74;G3UXA6;Q8BHD7-2;Q8BHD7;G3UZ01;G3UY95;G3UXZ8;F7C521;A0A1W2P7W3;B2RU80	G8JL74;G3UXA6;Q8BHD7-2;Q8BHD7;G3UZ01	11;11;11;11;10;4;3;1;1;1	8;8;8;8;8;3;2;0;0;0	8;8;8;8;8;3;2;0;0;0	Polypyrimidine tract-binding protein 3	Ptbp3	tr|G8JL74|G8JL74_MOUSE Polypyrimidine tract-binding protein 3 OS=Mus musculus OX=10090 GN=Ptbp3 PE=1 SV=1;tr|G3UXA6|G3UXA6_MOUSE Polypyrimidine tract-binding protein 3 OS=Mus musculus OX=10090 GN=Ptbp3 PE=1 SV=1;sp|Q8BHD7-2|PTBP3_MOUSE Isoform 2 of Polypyr	10	11	8	8	9	10	10	10	7	9	8	10	9	6	7	7	7	5	6	5	7	6	6	7	7	7	5	6	5	7	6	28.9	24.3	24.3	59.465	551	551;554;520;523;457;146;188;104;2285;1998	0	92.744
G3UXT7	ENSMUSG00000030795	233908	G3UXT7;Q8CFQ9;P56959;G3UZD2;Q91VQ2;F6QCI0;Q8BQ46	G3UXT7;Q8CFQ9;P56959	7;7;7;2;2;2;2	7;7;7;2;2;2;2	7;7;7;2;2;2;2	RNA-binding protein FUS	Fus	tr|G3UXT7|G3UXT7_MOUSE RNA-binding protein FUS (Fragment) OS=Mus musculus OX=10090 GN=Fus PE=1 SV=1;tr|Q8CFQ9|Q8CFQ9_MOUSE Fusion, derived from t(1216) malignant liposarcoma (Human) OS=Mus musculus OX=10090 GN=Fus PE=1 SV=1;sp|P56959|FUS_MOUSE RNA-binding	7	7	7	7	3	3	4	6	5	4	4	5	6	3	3	4	6	5	4	4	5	6	3	3	4	6	5	4	4	5	6	63.8	63.8	63.8	13.897	130	130;517;518;104;280;324;557	0	25.883
G3UXY0	ENSMUSG00000022216	19186	G3UXY0;G3X9K9;G3UXZ5;P97371;G3UWN9	G3UXY0;G3X9K9;G3UXZ5;P97371;G3UWN9	5;5;5;5;4	5;5;5;5;4	5;5;5;5;4	Proteasome activator complex subunit 1	Psme1	tr|G3UXY0|G3UXY0_MOUSE Proteasome activator complex subunit 1 OS=Mus musculus OX=10090 GN=Psme1 PE=1 SV=1;tr|G3X9K9|G3X9K9_MOUSE Proteasome activator complex subunit 1 OS=Mus musculus OX=10090 GN=Psme1 PE=1 SV=1;tr|G3UXZ5|G3UXZ5_MOUSE Proteasome activator	5	5	5	5	0	5	0	0	0	0	0	0	0	0	5	0	0	0	0	0	0	0	0	5	0	0	0	0	0	0	0	23	23	23	26.092	226	226;236;238;249;173	0	17.5
G3UY39	ENSMUSG00000024369	27632	G3UY39;P19426-2;P19426	G3UY39;P19426-2;P19426	1;1;1	1;1;1	1;1;1	Negative elongation factor E	Nelfe	tr|G3UY39|G3UY39_MOUSE Negative elongation factor E (Fragment) OS=Mus musculus OX=10090 GN=Nelfe PE=1 SV=1;sp|P19426-2|NELFE_MOUSE Isoform 2 of Negative elongation factor E OS=Mus musculus OX=10090 GN=Nelfe;sp|P19426|NELFE_MOUSE Negative elongation factor	3	1	1	1	0	0	0	0	0	0	0	1	1	0	0	0	0	0	0	0	1	1	0	0	0	0	0	0	0	1	1	7.9	7.9	7.9	25.777	228	228;367;375	0.0020243	3.2006
G3UY42	ENSMUSG00000022194	54196	G3UY42;Q8CCS6-2;Q8CCS6;D3YUB9;D3Z055;G3UWS5;D3Z5F7;G3UX74	G3UY42;Q8CCS6-2;Q8CCS6;D3YUB9;D3Z055;G3UWS5;D3Z5F7	3;3;3;2;2;2;2;1	3;3;3;2;2;2;2;1	3;3;3;2;2;2;2;1	Polyadenylate-binding protein 2	Pabpn1;Gm20521	tr|G3UY42|G3UY42_MOUSE Polyadenylate-binding protein 2 OS=Mus musculus OX=10090 GN=Pabpn1 PE=1 SV=1;sp|Q8CCS6-2|PABP2_MOUSE Isoform 2 of Polyadenylate-binding protein 2 OS=Mus musculus OX=10090 GN=Pabpn1;sp|Q8CCS6|PABP2_MOUSE Polyadenylate-binding protein	8	3	3	3	2	3	3	3	1	0	2	2	1	2	3	3	3	1	0	2	2	1	2	3	3	3	1	0	2	2	1	11	11	11	34.003	319	319;292;302;164;168;178;333;73	0	15.832
G3UY72	ENSMUSG00000053644	110695	G3UY72;G3UYR8;Q9DBF1-2;Q9DBF1;E9Q1H3	G3UY72;G3UYR8;Q9DBF1-2;Q9DBF1;E9Q1H3	2;2;2;2;1	2;2;2;2;1	2;2;2;2;1	Alpha-aminoadipic semialdehyde dehydrogenase	Aldh7a1	tr|G3UY72|G3UY72_MOUSE Alpha-aminoadipic semialdehyde dehydrogenase (Fragment) OS=Mus musculus OX=10090 GN=Aldh7a1 PE=1 SV=1;tr|G3UYR8|G3UYR8_MOUSE Aldehyde dehydrogenase (NAD(+)) OS=Mus musculus OX=10090 GN=Aldh7a1 PE=1 SV=1;sp|Q9DBF1-2|AL7A1_MOUSE Isofor	5	2	2	2	0	2	0	0	0	0	0	0	0	0	2	0	0	0	0	0	0	0	0	2	0	0	0	0	0	0	0	9.7	9.7	9.7	35.132	321	321;475;511;539;161	0	5.3824
G3UYH2	ENSMUSG00000017428	69077	G3UYH2;Q8BG32;G3UWW7;G3UXL5;G3UZ28	G3UYH2;Q8BG32;G3UWW7;G3UXL5	3;3;2;2;1	3;3;2;2;1	3;3;2;2;1	26S proteasome non-ATPase regulatory subunit 11	Psmd11	tr|G3UYH2|G3UYH2_MOUSE 26S proteasome non-ATPase regulatory subunit 11 (Fragment) OS=Mus musculus OX=10090 GN=Psmd11 PE=1 SV=1;sp|Q8BG32|PSD11_MOUSE 26S proteasome non-ATPase regulatory subunit 11 OS=Mus musculus OX=10090 GN=Psmd11 PE=1 SV=3;tr|G3UWW7|G3UW	5	3	3	3	0	3	0	0	0	0	0	0	0	0	3	0	0	0	0	0	0	0	0	3	0	0	0	0	0	0	0	18.2	18.2	18.2	23.663	209	209;422;158;160;95	0	7.0648
G3UYU5	ENSMUSG00000021418	208366	G3UYU5;Q8R1F9	G3UYU5;Q8R1F9	3;3	3;3	3;3	Ribonuclease P protein subunit p40	Rpp40	tr|G3UYU5|G3UYU5_MOUSE Ribonuclease P protein subunit p40 OS=Mus musculus OX=10090 GN=Rpp40 PE=1 SV=1;sp|Q8R1F9|RPP40_MOUSE Ribonuclease P protein subunit p40 OS=Mus musculus OX=10090 GN=Rpp40 PE=2 SV=2	2	3	3	3	1	0	1	1	1	1	0	2	2	1	0	1	1	1	1	0	2	2	1	0	1	1	1	1	0	2	2	8.2	8.2	8.2	39.121	340	340;363	0	5.2062
G3UYV7	ENSMUSG00000067288	54127	G3UYV7;P62858	G3UYV7;P62858	1;1	1;1	1;1	40S ribosomal protein S28	Rps28	tr|G3UYV7|G3UYV7_MOUSE 40S ribosomal protein S28 (Fragment) OS=Mus musculus OX=10090 GN=Rps28 PE=1 SV=1;sp|P62858|RS28_MOUSE 40S ribosomal protein S28 OS=Mus musculus OX=10090 GN=Rps28 PE=1 SV=1	2	1	1	1	0	0	0	0	1	1	0	0	0	0	0	0	0	1	1	0	0	0	0	0	0	0	1	1	0	0	0	21.4	21.4	21.4	6.3442	56	56;69	0	11.047
G3UZA0	ENSMUSG00000063334	52705	G3UZA0;Q8BGA5	G3UZA0;Q8BGA5	9;9	9;9	9;9	KRR1 small subunit processome component homolog	Krr1	tr|G3UZA0|G3UZA0_MOUSE KRR1 small subunit processome component OS=Mus musculus OX=10090 GN=Krr1 PE=1 SV=1;sp|Q8BGA5|KRR1_MOUSE KRR1 small subunit processome component homolog OS=Mus musculus OX=10090 GN=Krr1 PE=2 SV=1	2	9	9	9	5	2	3	4	7	6	5	4	6	5	2	3	4	7	6	5	4	6	5	2	3	4	7	6	5	4	6	32.5	32.5	32.5	36.66	323	323;380	0	27.316
G3UZA4	ENSMUSG00000024387	13001	G3UZA4;G3UZJ5;G3UZX4;P67871;G3UWU5;G3UXG7;G3UXU2	G3UZA4;G3UZJ5;G3UZX4;P67871;G3UWU5;G3UXG7;G3UXU2	2;2;2;2;1;1;1	2;2;2;2;1;1;1	2;2;2;2;1;1;1	Casein kinase II subunit beta	Csnk2b	tr|G3UZA4|G3UZA4_MOUSE Casein kinase II subunit beta (Fragment) OS=Mus musculus OX=10090 GN=Csnk2b PE=1 SV=8;tr|G3UZJ5|G3UZJ5_MOUSE Casein kinase II subunit beta (Fragment) OS=Mus musculus OX=10090 GN=Csnk2b PE=1 SV=2;tr|G3UZX4|G3UZX4_MOUSE Casein kinase I	7	2	2	2	2	2	2	2	0	0	0	1	0	2	2	2	2	0	0	0	1	0	2	2	2	2	0	0	0	1	0	22.1	22.1	22.1	14.279	122	122;206;257;215;58;164;180	0	6.6089
G3UZJ4	ENSMUSG00000024953	54683	G3UZJ4;H3BJQ7;P99029-2;P99029;A0A494BAZ4	G3UZJ4;H3BJQ7;P99029-2;P99029;A0A494BAZ4	3;3;3;3;2	3;3;3;3;2	3;3;3;3;2	Peroxiredoxin-5, mitochondrial	Prdx5	tr|G3UZJ4|G3UZJ4_MOUSE Thioredoxin-dependent peroxiredoxin OS=Mus musculus OX=10090 GN=Prdx5 PE=1 SV=1;tr|H3BJQ7|H3BJQ7_MOUSE Peroxiredoxin-5 OS=Mus musculus OX=10090 GN=Prdx5 PE=1 SV=1;sp|P99029-2|PRDX5_MOUSE Isoform Cytoplasmic+peroxisomal of Peroxiredox	5	3	3	3	0	3	0	0	0	0	0	0	0	0	3	0	0	0	0	0	0	0	0	3	0	0	0	0	0	0	0	18.1	18.1	18.1	17.253	166	166;213;162;210;142	0	5.8462
G3X8T2	ENSMUSG00000017478	76014	G3X8T2;Q0P678;H3BIW0;H3BJJ9;Q0P678-2;H3BKL4	G3X8T2;Q0P678;H3BIW0	11;11;10;3;3;1	11;11;10;3;3;1	11;11;10;3;3;1	Zinc finger CCCH domain-containing protein 18	Zc3h18	tr|G3X8T2|G3X8T2_MOUSE Zinc finger CCCH domain-containing protein 18 OS=Mus musculus OX=10090 GN=Zc3h18 PE=1 SV=1;sp|Q0P678|ZCH18_MOUSE Zinc finger CCCH domain-containing protein 18 OS=Mus musculus OX=10090 GN=Zc3h18 PE=1 SV=1;tr|H3BIW0|H3BIW0_MOUSE Zinc f	6	11	11	11	7	6	4	4	3	7	2	3	3	7	6	4	4	3	7	2	3	3	7	6	4	4	3	7	2	3	3	20.2	20.2	20.2	108.23	972	972;948;950;241;316;104	0	44.69
G3X926	ENSMUSG00000038510	67239	G3X926;Q9JJ80;S4R1Y5;S4R2H5;S4R2R2	G3X926;Q9JJ80;S4R1Y5;S4R2H5	13;13;11;7;5	13;13;11;7;5	13;13;11;7;5	Ribosome production factor 2 homolog	Rpf2	tr|G3X926|G3X926_MOUSE Ribosome production factor 2 homolog OS=Mus musculus OX=10090 GN=Rpf2 PE=1 SV=1;sp|Q9JJ80|RPF2_MOUSE Ribosome production factor 2 homolog OS=Mus musculus OX=10090 GN=Rpf2 PE=2 SV=2;tr|S4R1Y5|S4R1Y5_MOUSE Ribosome production factor 2	5	13	13	13	11	11	10	12	10	10	11	10	12	11	11	10	12	10	10	11	10	12	11	11	10	12	10	10	11	10	12	53.8	53.8	53.8	31.471	273	273;306;257;205;153	0	287.52
G3X956	ENSMUSG00000035726	114741	G3X956;Q920B9	G3X956;Q920B9	30;30	30;30	30;30	FACT complex subunit SPT16	Supt16;Supt16h	tr|G3X956|G3X956_MOUSE FACT complex subunit OS=Mus musculus OX=10090 GN=Supt16 PE=1 SV=1;sp|Q920B9|SP16H_MOUSE FACT complex subunit SPT16 OS=Mus musculus OX=10090 GN=Supt16h PE=1 SV=2	2	30	30	30	23	17	23	18	19	20	16	21	22	23	17	23	18	19	20	16	21	22	23	17	23	18	19	20	16	21	22	31.7	31.7	31.7	119.84	1047	1047;1047	0	167.78
G3X963	ENSMUSG00000022360	70472	G3X963;Q8CDM1;Q8CDM1-2	G3X963;Q8CDM1	11;9;4	11;9;4	11;9;4	ATPase family AAA domain-containing protein 2	Atad2	tr|G3X963|G3X963_MOUSE ATPase family AAA domain-containing protein 2 OS=Mus musculus OX=10090 GN=Atad2 PE=1 SV=1;sp|Q8CDM1|ATAD2_MOUSE ATPase family AAA domain-containing protein 2 OS=Mus musculus OX=10090 GN=Atad2 PE=1 SV=1	3	11	11	11	2	2	2	3	2	4	4	4	8	2	2	2	3	2	4	4	4	8	2	2	2	3	2	4	4	4	8	11	11	11	155.28	1364	1364;1040;400	0	28.174
G3X9B1	ENSMUSG00000050244	217995	G3X9B1;A0A1Y7VNI1;A0A1Y7VNG8	G3X9B1	60;18;9	60;18;9	60;18;9	HEAT repeat containing 1	Heatr1	tr|G3X9B1|G3X9B1_MOUSE HEAT repeat-containing protein 1 OS=Mus musculus OX=10090 GN=Heatr1 PE=1 SV=1	3	60	60	60	41	31	37	43	44	39	45	47	44	41	31	37	43	44	39	45	47	44	41	31	37	43	44	39	45	47	44	32.2	32.2	32.2	242.07	2143	2143;744;344	0	323.31
G3X9M0	ENSMUSG00000068921	65111	G3X9M0;Q9ER88;A0A0R4J1B9;Q9ER88-2;G3UWZ6;G3UWJ4;G3UZC0;G3UWM7;G3UWR5;G3UYM6;G3UYP3	G3X9M0;Q9ER88;A0A0R4J1B9;Q9ER88-2;G3UWZ6	9;9;8;8;5;4;4;4;3;2;1	9;9;8;8;5;4;4;4;3;2;1	9;9;8;8;5;4;4;4;3;2;1	28S ribosomal protein S29, mitochondrial	Dap3	tr|G3X9M0|G3X9M0_MOUSE 28S ribosomal protein S29, mitochondrial OS=Mus musculus OX=10090 GN=Dap3 PE=1 SV=1;sp|Q9ER88|RT29_MOUSE 28S ribosomal protein S29, mitochondrial OS=Mus musculus OX=10090 GN=Dap3 PE=1 SV=1;tr|A0A0R4J1B9|A0A0R4J1B9_MOUSE 28S ribosomal	11	9	9	9	8	7	6	1	1	0	0	0	0	8	7	6	1	1	0	0	0	0	8	7	6	1	1	0	0	0	0	28.8	28.8	28.8	45.287	396	396;391;366;361;255;200;212;217;165;133;66	0	29.788
G5E850	ENSMUSG00000024646	109672	G5E850;P56395	G5E850;P56395	1;1	1;1	1;1	Cytochrome b5	Cyb5a	tr|G5E850|G5E850_MOUSE Cytochrome b5 OS=Mus musculus OX=10090 GN=Cyb5a PE=1 SV=1;sp|P56395|CYB5_MOUSE Cytochrome b5 OS=Mus musculus OX=10090 GN=Cyb5a PE=1 SV=2	2	1	1	1	0	1	0	0	0	0	0	0	0	0	1	0	0	0	0	0	0	0	0	1	0	0	0	0	0	0	0	13.3	13.3	13.3	11.142	98	98;134	0.0032425	2.8615
G5E866	ENSMUSG00000025982	81898	G5E866;Q99NB9	G5E866;Q99NB9	20;20	20;20	20;20	Splicing factor 3B subunit 1	Sf3b1	tr|G5E866|G5E866_MOUSE Splicing factor 3B subunit 1 OS=Mus musculus OX=10090 GN=Sf3b1 PE=1 SV=1;sp|Q99NB9|SF3B1_MOUSE Splicing factor 3B subunit 1 OS=Mus musculus OX=10090 GN=Sf3b1 PE=1 SV=1	2	20	20	20	9	13	10	12	10	9	12	11	10	9	13	10	12	10	9	12	11	10	9	13	10	12	10	9	12	11	10	20.5	20.5	20.5	145.83	1304	1304;1304	0	90.929
G5E870	ENSMUSG00000026219	14897	G5E870;A0A087WNZ7;A0A0B4J1N9;A0A087WRV6;A0A087WP92;A0A087WQ02;Q3TP48;A0A087WS65;A0A087WSG4;A0A087WS33	G5E870;A0A087WNZ7	39;38;18;15;9;7;4;3;3;1	39;38;18;15;9;7;4;3;3;1	39;38;18;15;9;7;4;3;3;1	E3 ubiquitin-protein ligase TRIP12	Trip12	sp|G5E870|TRIPC_MOUSE E3 ubiquitin-protein ligase TRIP12 OS=Mus musculus OX=10090 GN=Trip12 PE=1 SV=1;tr|A0A087WNZ7|A0A087WNZ7_MOUSE E3 ubiquitin-protein ligase TRIP12 OS=Mus musculus OX=10090 GN=Trip12 PE=1 SV=1	10	39	39	39	26	23	26	30	29	25	25	26	34	26	23	26	30	29	25	25	26	34	26	23	26	30	29	25	25	26	34	27.2	27.2	27.2	224.13	2025	2025;1992;982;830;423;346;146;65;213;98	0	323.31
G5E895	ENSMUSG00000061758	67861	G5E895;S4R2G9;D3Z494	G5E895;S4R2G9;D3Z494	2;1;1	2;1;1	2;1;1	aldo-keto reductase family 1, member B10 (aldose reductase)	Akr1b10	tr|G5E895|G5E895_MOUSE Aldo-keto reductase family 1, member B10 (aldose reductase) OS=Mus musculus OX=10090 GN=Akr1b10 PE=1 SV=1;tr|S4R2G9|S4R2G9_MOUSE Aldo-keto reductase family 1, member B10 (aldose reductase) OS=Mus musculus OX=10090 GN=Akr1b10 PE=1 SV=	3	2	2	2	0	2	0	0	0	0	0	0	0	0	2	0	0	0	0	0	0	0	0	2	0	0	0	0	0	0	0	5.1	5.1	5.1	35.848	316	316;145;288	0.0013966	3.6315
G5E898	ENSMUSG00000039457	19041	G5E898;Q9R269	G5E898;Q9R269	14;14	14;14	14;14	Periplakin	Ppl	tr|G5E898|G5E898_MOUSE Periplakin OS=Mus musculus OX=10090 GN=Ppl PE=1 SV=1;sp|Q9R269|PEPL_MOUSE Periplakin OS=Mus musculus OX=10090 GN=Ppl PE=1 SV=1	2	14	14	14	0	14	0	0	0	0	0	0	0	0	14	0	0	0	0	0	0	0	0	14	0	0	0	0	0	0	0	8.6	8.6	8.6	203.78	1754	1754;1755	0	46.747
G5E8P1	ENSMUSG00000022387	223770	G5E8P1;G5E8P1-2	G5E8P1;G5E8P1-2	7;7	7;7	7;7	bromodomain containing 1	Brd1	sp|G5E8P1|BRD1_MOUSE Bromodomain-containing protein 1 OS=Mus musculus OX=10090 GN=Brd1 PE=1 SV=1;sp|G5E8P1-2|BRD1_MOUSE Isoform 2 of Bromodomain-containing protein 1 OS=Mus musculus OX=10090 GN=Brd1	2	7	7	7	0	0	1	6	3	1	5	2	3	0	0	1	6	3	1	5	2	3	0	0	1	6	3	1	5	2	3	6.7	6.7	6.7	119.71	1058	1058;1189	0	17.531
G5E8Z3	ENSMUSG00000090314	66533	G5E8Z3	G5E8Z3	3	3	3	RIKEN cDNA 2310050C09 gene	2310050C09Rik	tr|G5E8Z3|G5E8Z3_MOUSE RIKEN cDNA 2310050C09 gene OS=Mus musculus OX=10090 GN=2310050C09Rik PE=1 SV=1	1	3	3	3	1	2	0	1	1	1	0	1	2	1	2	0	1	1	1	0	1	2	1	2	0	1	1	1	0	1	2	12.1	12.1	12.1	29.144	280	280	0	31.658
G5E902	ENSMUSG00000061904	18674	G5E902;Q8VEM8	G5E902;Q8VEM8	1;1	1;1	1;1	Phosphate carrier protein, mitochondrial	Slc25a3	tr|G5E902|G5E902_MOUSE Phosphate carrier protein, mitochondrial OS=Mus musculus OX=10090 GN=Slc25a3 PE=1 SV=1;sp|Q8VEM8|MPCP_MOUSE Phosphate carrier protein, mitochondrial OS=Mus musculus OX=10090 GN=Slc25a3 PE=1 SV=1	2	1	1	1	0	1	0	0	0	0	0	0	0	0	1	0	0	0	0	0	0	0	0	1	0	0	0	0	0	0	0	3.4	3.4	3.4	39.736	358	358;357	0.0014255	3.9877
G5E924	ENSMUSG00000015165	15388	G5E924;G3UY56;G3UYY3	G5E924	21;3;1	21;3;1	1;0;0	heterogeneous nuclear ribonucleoprotein L	Hnrnpl	tr|G5E924|G5E924_MOUSE Heterogeneous nuclear ribonucleoprotein L (Fragment) OS=Mus musculus OX=10090 GN=Hnrnpl PE=1 SV=1	3	21	21	1	17	16	18	17	17	16	15	17	16	17	16	18	17	17	16	15	17	16	1	1	1	1	1	1	1	1	1	49.8	49.8	2.6	66.821	615	615;201;112	0	323.31
H3BJX8	ENSMUSG00000028059	16800	H3BJX8;Q60875;Q60875-4;Q60875-5;H3BKH9;H3BJ40;H3BJ45;H3BJU7;Q60875-3;Q60875-2;H3BJ59;H3BL15;H3BLF9;H3BJ48;H3BIX8;H3BLJ1;H3BJM4	H3BJX8;Q60875;Q60875-4;Q60875-5;H3BKH9;H3BJ40;H3BJ45;H3BJU7	7;7;7;7;7;7;7;7;3;3;2;2;2;1;1;1;1	7;7;7;7;7;7;7;7;3;3;2;2;2;1;1;1;1	7;7;7;7;7;7;7;7;3;3;2;2;2;1;1;1;1	Rho guanine nucleotide exchange factor 2	Arhgef2	tr|H3BJX8|H3BJX8_MOUSE Guanine nucleotide exchange factor H1 OS=Mus musculus OX=10090 GN=Arhgef2 PE=1 SV=2;sp|Q60875|ARHG2_MOUSE Rho guanine nucleotide exchange factor 2 OS=Mus musculus OX=10090 GN=Arhgef2 PE=1 SV=4;sp|Q60875-4|ARHG2_MOUSE Isoform 4 of Rho	17	7	7	7	3	0	3	2	1	1	2	3	2	3	0	3	2	1	1	2	3	2	3	0	3	2	1	1	2	3	2	6.3	6.3	6.3	133.7	1183	1183;985;958;956;983;970;968;956;588;573;208;257;203;89;130;126;84	0	12.93
Q7TN74	ENSMUSG00000032827	243725	Q7TN74;H3BJD6	Q7TN74;H3BJD6	1;1	1;1	1;1	protein phosphatase 1, regulatory subunit 9A	Ppp1r9a	tr|Q7TN74|Q7TN74_MOUSE Neurabin I OS=Mus musculus OX=10090 GN=Ppp1r9a PE=1 SV=1;tr|H3BJD6|H3BJD6_MOUSE Protein phosphatase 1, regulatory subunit 9A OS=Mus musculus OX=10090 GN=Ppp1r9a PE=1 SV=1	2	1	1	1	0	0	1	0	0	0	0	0	0	0	0	1	0	0	0	0	0	0	0	0	1	0	0	0	0	0	0	0.8	0.8	0.8	122.95	1095	1095;1292	1	-2
H3BJP2	ENSMUSG00000021996	13885	H3BJP2;H3BLJ9;H3BJL6;H3BKH6;Q9R0P3;H3BK43;H3BJC6;H3BL99	H3BJP2;H3BLJ9;H3BJL6;H3BKH6;Q9R0P3;H3BK43;H3BJC6	4;4;4;4;4;3;2;1	4;4;4;4;4;3;2;1	4;4;4;4;4;3;2;1	S-formylglutathione hydrolase	Esd	tr|H3BJP2|H3BJP2_MOUSE S-formylglutathione hydrolase (Fragment) OS=Mus musculus OX=10090 GN=Esd PE=1 SV=1;tr|H3BLJ9|H3BLJ9_MOUSE S-formylglutathione hydrolase OS=Mus musculus OX=10090 GN=Esd PE=1 SV=1;tr|H3BJL6|H3BJL6_MOUSE S-formylglutathione hydrolase OS	8	4	4	4	0	0	0	0	0	1	2	1	3	0	0	0	0	0	1	2	1	3	0	0	0	0	0	1	2	1	3	23.9	23.9	23.9	27.131	247	247;259;265;295;282;249;135;105	0	11.996
H3BJS1	ENSMUSG00000021147	207615	H3BJS1;H3BK66;Q05BF4;H3BJR7;Q8CBE3	H3BJS1;H3BK66;Q05BF4;H3BJR7;Q8CBE3	2;1;1;1;1	2;1;1;1;1	2;1;1;1;1	WD repeat-containing protein 37	Wdr37	tr|H3BJS1|H3BJS1_MOUSE WD repeat-containing protein 37 (Fragment) OS=Mus musculus OX=10090 GN=Wdr37 PE=1 SV=1;tr|H3BK66|H3BK66_MOUSE WD repeat-containing protein 37 (Fragment) OS=Mus musculus OX=10090 GN=Wdr37 PE=1 SV=1;tr|Q05BF4|Q05BF4_MOUSE WD repeat-con	5	2	2	2	1	0	0	0	1	1	0	1	2	1	0	0	0	1	1	0	1	2	1	0	0	0	1	1	0	1	2	13.5	13.5	13.5	20.466	185	185;133;170;179;496	0	16.961
H3BL37	ENSMUSG00000024613	21453	H3BL37;O08784;H3BIX0;F6R3V4;H3BK88	H3BL37;O08784;H3BIX0;F6R3V4	13;13;9;7;1	13;13;9;7;1	13;13;9;7;1	Treacle protein	Tcof1	tr|H3BL37|H3BL37_MOUSE Treacle protein OS=Mus musculus OX=10090 GN=Tcof1 PE=1 SV=1;sp|O08784|TCOF_MOUSE Treacle protein OS=Mus musculus OX=10090 GN=Tcof1 PE=1 SV=1;tr|H3BIX0|H3BIX0_MOUSE Treacle protein (Fragment) OS=Mus musculus OX=10090 GN=Tcof1 PE=1 SV=	5	13	13	13	9	9	9	11	7	5	8	5	10	9	9	9	11	7	5	8	5	10	9	9	9	11	7	5	8	5	10	14.3	14.3	14.3	138.55	1356	1356;1320;1056;1013;167	0	45.921
H7BX94	ENSMUSG00000030980	66356	H7BX94;Q9Z2Q2;K4DI66;Q9Z2Q2-2;F6ZLH4;Q9Z2Q2-3;E9QKQ3;D3Z5V3	H7BX94;Q9Z2Q2;K4DI66;Q9Z2Q2-2;F6ZLH4;Q9Z2Q2-3	15;15;9;9;8;8;6;3	15;15;9;9;8;8;6;3	15;15;9;9;8;8;6;3	Lysine-rich nucleolar protein 1	Knop1	tr|H7BX94|H7BX94_MOUSE Lysine-rich nucleolar protein 1 OS=Mus musculus OX=10090 GN=Knop1 PE=1 SV=2;sp|Q9Z2Q2|KNOP1_MOUSE Lysine-rich nucleolar protein 1 OS=Mus musculus OX=10090 GN=Knop1 PE=1 SV=2;tr|K4DI66|K4DI66_MOUSE Lysine-rich nucleolar protein 1 OS=M	8	15	15	15	8	9	10	12	9	10	8	7	10	8	9	10	12	9	10	8	7	10	8	9	10	12	9	10	8	7	10	33.3	33.3	33.3	59.679	532	532;478;370;318;347;295;189;192	0	141.89
H7BX95	ENSMUSG00000018379	110809	H7BX95;Q6PDM2;Q6PDM2-3;Q6PDM2-2;F7AI47;F6QXN3	H7BX95;Q6PDM2;Q6PDM2-3;Q6PDM2-2	10;10;9;9;4;1	10;10;9;9;4;1	10;10;9;9;4;1	Serine/arginine-rich splicing factor 1	Srsf1	tr|H7BX95|H7BX95_MOUSE Serine/arginine-rich splicing factor 1 OS=Mus musculus OX=10090 GN=Srsf1 PE=1 SV=1;sp|Q6PDM2|SRSF1_MOUSE Serine/arginine-rich splicing factor 1 OS=Mus musculus OX=10090 GN=Srsf1 PE=1 SV=3;sp|Q6PDM2-3|SRSF1_MOUSE Isoform 3 of Serine/a	6	10	10	10	9	9	7	9	8	8	6	9	8	9	9	7	9	8	8	6	9	8	9	9	7	9	8	8	6	9	8	42.7	42.7	42.7	28.329	253	253;248;196;201;106;58	0	90.519
H9KV00	ENSMUSG00000022961	20658	H9KV00;Q9QX47-3;Q9QX47;H9KV01;H9KV15;Q9QX47-4;Q9QX47-2;H9KV02;F7CU80	H9KV00;Q9QX47-3;Q9QX47;H9KV01;H9KV15;Q9QX47-4;Q9QX47-2	25;25;25;24;24;24;21;9;4	25;25;25;24;24;24;21;9;4	25;25;25;24;24;24;21;9;4	Protein SON	Son	tr|H9KV00|H9KV00_MOUSE Protein SON OS=Mus musculus OX=10090 GN=Son PE=1 SV=1;sp|Q9QX47-3|SON_MOUSE Isoform 3 of Protein SON OS=Mus musculus OX=10090 GN=Son;sp|Q9QX47|SON_MOUSE Protein SON OS=Mus musculus OX=10090 GN=Son PE=1 SV=2;tr|H9KV01|H9KV01_MOUSE Pro	9	25	25	25	11	11	15	14	13	9	13	15	19	11	11	15	14	13	9	13	15	19	11	11	15	14	13	9	13	15	19	15.3	15.3	15.3	268.82	2477	2477;2404;2444;2321;2343;2281;2126;454;478	0	110.36
I7HFT9	ENSMUSG00000036211	107970	I7HFT9	I7HFT9	7	5	1	H1.6 linker histone, cluster member	Hist1h1t	tr|I7HFT9|I7HFT9_MOUSE H1.6 linker histone, cluster member OS=Mus musculus OX=10090 GN=H1f6 PE=1 SV=1	1	7	5	1	6	5	5	5	6	5	5	5	5	4	3	3	3	4	3	3	3	3	1	1	1	1	1	1	1	1	1	34	28.2	11	21.669	209	209	0	22.87
Q6ZWV3	ENSMUSG00000008682	110954	Q6ZWV3;I7HLV2;A0A1B0GXC3	Q6ZWV3;I7HLV2	7;7;2	7;7;2	1;1;0	60S ribosomal protein L10	Rpl10	sp|Q6ZWV3|RL10_MOUSE 60S ribosomal protein L10 OS=Mus musculus OX=10090 GN=Rpl10 PE=1 SV=3;tr|I7HLV2|I7HLV2_MOUSE 60S ribosomal protein L10 (Fragment) OS=Mus musculus OX=10090 GN=Rpl10 PE=1 SV=1	3	7	7	1	5	5	6	5	5	6	5	5	7	5	5	6	5	5	6	5	5	7	1	1	1	1	1	1	1	1	1	41.6	41.6	6.1	24.604	214	214;201;166	0	75.975
J3QK52	ENSMUSG00000095567	57741	J3QK52;Q9WV70	J3QK52;Q9WV70	11;9	11;9	11;9	Nucleolar complex protein 2 homolog	Noc2l	tr|J3QK52|J3QK52_MOUSE Nucleolar complex protein 2 homolog OS=Mus musculus OX=10090 GN=Noc2l PE=1 SV=1;sp|Q9WV70|NOC2L_MOUSE Nucleolar complex protein 2 homolog OS=Mus musculus OX=10090 GN=Noc2l PE=1 SV=2	2	11	11	11	4	2	6	3	5	6	6	6	2	4	2	6	3	5	6	6	6	2	4	2	6	3	5	6	6	6	2	14.9	14.9	14.9	85.637	750	750;747	0	52.478
J3QMG3	ENSMUSG00000008892	22335	J3QMG3;Q60931	J3QMG3;Q60931	1;1	1;1	1;1	Voltage-dependent anion-selective channel protein 3	Vdac3	tr|J3QMG3|J3QMG3_MOUSE Voltage-dependent anion-selective channel protein 3 OS=Mus musculus OX=10090 GN=Vdac3 PE=1 SV=1;sp|Q60931|VDAC3_MOUSE Voltage-dependent anion-selective channel protein 3 OS=Mus musculus OX=10090 GN=Vdac3 PE=1 SV=1	2	1	1	1	0	0	0	0	0	0	0	0	1	0	0	0	0	0	0	0	0	1	0	0	0	0	0	0	0	0	1	4.6	4.6	4.6	30.851	284	284;283	0	7.0723
J3QNW0	ENSMUSG00000004099	13433	J3QNW0	J3QNW0	42	1	1	DNA (cytosine-5)-methyltransferase	Dnmt1	tr|J3QNW0|J3QNW0_MOUSE DNA (cytosine-5)-methyltransferase OS=Mus musculus OX=10090 GN=Dnmt1 PE=1 SV=1	1	42	1	1	26	15	28	35	28	22	23	27	33	1	1	0	1	0	0	1	1	1	1	1	0	1	0	0	1	1	1	35.7	1.1	1.1	169.95	1501	1501	0	10.469
K3W4R2	ENSMUSG00000030739	71960	K3W4R2;Q6URW6-2;Q6URW6;Q6URW6-3;A0A140LI60	K3W4R2;Q6URW6-2;Q6URW6;Q6URW6-3;A0A140LI60	12;12;12;12;7	8;8;8;8;6	8;8;8;8;6	Myosin-14	Myh14	tr|K3W4R2|K3W4R2_MOUSE Myosin-14 OS=Mus musculus OX=10090 GN=Myh14 PE=1 SV=1;sp|Q6URW6-2|MYH14_MOUSE Isoform 2 of Myosin-14 OS=Mus musculus OX=10090 GN=Myh14;sp|Q6URW6|MYH14_MOUSE Myosin-14 OS=Mus musculus OX=10090 GN=Myh14 PE=1 SV=1;sp|Q6URW6-3|MYH14_MOUS	5	12	8	8	0	11	0	0	0	0	0	1	0	0	8	0	0	0	0	0	0	0	0	8	0	0	0	0	0	0	0	6.7	4.2	4.2	228.56	2000	2000;1992;2000;2033;1245	0	18.171
Q3UC82	ENSMUSG00000020697	16882	Q3UC82;Q80ZH7;K4DI59;P97386;B1AT03;P97386-2;Q3TJN5;G3UYI8	Q3UC82;Q80ZH7;K4DI59;P97386;B1AT03;P97386-2	16;16;16;16;15;15;6;2	16;16;16;16;15;15;6;2	16;16;16;16;15;15;6;2	DNA ligase;DNA ligase 3	Lig3	tr|Q3UC82|Q3UC82_MOUSE DNA ligase OS=Mus musculus OX=10090 GN=Lig3 PE=1 SV=1;tr|Q80ZH7|Q80ZH7_MOUSE DNA ligase OS=Mus musculus OX=10090 GN=Lig3 PE=1 SV=1;tr|K4DI59|K4DI59_MOUSE DNA ligase OS=Mus musculus OX=10090 GN=Lig3 PE=1 SV=1;sp|P97386|DNLI3_MOUSE DNA	8	16	16	16	8	5	9	6	3	8	5	9	7	8	5	9	6	3	8	5	9	7	8	5	9	6	3	8	5	9	7	18.8	18.8	18.8	112.71	1011	1011;1012;1016;1015;953;956;431;174	0	62.157
K7N769	ENSMUSG00000074832	76803	K7N769;A2BE23;A0A1B0GT13;Q8C1L2;D3Z1G5;K7N6R7;D3Z5Z2;A0A087WR27;D3Z5Y8;E9QAG8	K7N769	6;2;2;1;1;1;1;1;1;1	6;2;2;1;1;1;1;1;1;1	3;1;0;1;0;0;0;0;0;0	zinc finger protein 998	2410141K09Rik	tr|K7N769|K7N769_MOUSE Zinc finger protein 998 OS=Mus musculus OX=10090 GN=Zfp998 PE=1 SV=2	10	6	6	3	2	3	2	4	2	1	2	4	5	2	3	2	4	2	1	2	4	5	0	1	0	1	0	0	0	1	2	45.9	45.9	8.4	53.746	464	464;498;591;95;191;221;493;526;553;526	0	31.288
L7N212	ENSMUSG00000068134	104348	L7N212;Q8BZW4-2;Q8BZW4;F8VPU7;A0A087WNP5	L7N212;Q8BZW4-2;Q8BZW4	3;3;3;1;1	1;1;1;1;1	1;1;1;1;1	Zinc finger protein 120	Zfp120	tr|L7N212|L7N212_MOUSE Zinc finger protein 120 OS=Mus musculus OX=10090 GN=Zfp120 PE=4 SV=1;sp|Q8BZW4-2|ZN120_MOUSE Isoform 2 of Zinc finger protein 120 OS=Mus musculus OX=10090 GN=Zfp120;sp|Q8BZW4|ZN120_MOUSE Zinc finger protein 120 OS=Mus musculus OX=100	5	3	1	1	1	1	1	2	2	1	2	2	2	0	0	0	1	1	0	1	1	1	0	0	0	1	1	0	1	1	1	8	3.6	3.6	48.343	414	414;415;436;498;499	0.0026042	2.8979
M0QWY0	ENSMUSG00000031819	18117	M0QWY0;M0QWP2;O70378	M0QWY0;M0QWP2;O70378	2;2;2	2;2;2	2;2;2	ER membrane protein complex subunit 8	Emc8	tr|M0QWY0|M0QWY0_MOUSE ER membrane protein complex subunit 8 (Fragment) OS=Mus musculus OX=10090 GN=Emc8 PE=1 SV=1;tr|M0QWP2|M0QWP2_MOUSE ER membrane protein complex subunit 8 (Fragment) OS=Mus musculus OX=10090 GN=Emc8 PE=1 SV=1;sp|O70378|EMC8_MOUSE ER me	3	2	2	2	2	2	1	1	0	0	1	1	2	2	2	1	1	0	0	1	1	2	2	2	1	1	0	0	1	1	2	19.5	19.5	19.5	14.376	128	128;143;207	0	11.439
O08582	ENSMUSG00000042535	14904	O08582;A0A2R8W6Z1	O08582;A0A2R8W6Z1	2;1	2;1	2;1	GTP-binding protein 1	Gtpbp1	sp|O08582|GTPB1_MOUSE GTP-binding protein 1 OS=Mus musculus OX=10090 GN=Gtpbp1 PE=1 SV=2;tr|A0A2R8W6Z1|A0A2R8W6Z1_MOUSE GTP-binding protein 1 (Fragment) OS=Mus musculus OX=10090 GN=Gtpbp1 PE=1 SV=1	2	2	2	2	0	1	1	0	1	0	1	2	1	0	1	1	0	1	0	1	2	1	0	1	1	0	1	0	1	2	1	4.8	4.8	4.8	72.3	668	668;145	0	5.9575
O08583	ENSMUSG00000025134	21681	O08583;O08583-2;Q9JJW6-2;G3X9I4;Q9JJW6	O08583;O08583-2;Q9JJW6-2	6;5;3;2;2	6;5;3;2;2	6;5;3;2;2	THO complex subunit 4;Aly/REF export factor 2	Alyref;Alyref2	sp|O08583|THOC4_MOUSE THO complex subunit 4 OS=Mus musculus OX=10090 GN=Alyref PE=1 SV=3;sp|O08583-2|THOC4_MOUSE Isoform 2 of THO complex subunit 4 OS=Mus musculus OX=10090 GN=Alyref;sp|Q9JJW6-2|ALRF2_MOUSE Isoform 2 of Aly/REF export factor 2 OS=Mus muscu	5	6	6	6	5	6	5	6	6	6	6	5	6	5	6	5	6	6	6	6	5	6	5	6	5	6	6	6	6	5	6	33.3	33.3	33.3	26.94	255	255;163;217;218;218	0	323.31
Q3UI33	ENSMUSG00000036112	56307	Q3UI33;O08663;Q3TMN1;M0QW48;M0QWM9;M0QW69;M0QWX0	Q3UI33;O08663;Q3TMN1;M0QW48;M0QWM9	7;7;6;4;4;2;1	7;7;6;4;4;2;1	7;7;6;4;4;2;1	Methionine aminopeptidase 2;Methionine aminopeptidase	Metap2	tr|Q3UI33|Q3UI33_MOUSE Methionine aminopeptidase 2 OS=Mus musculus OX=10090 GN=Metap2 PE=1 SV=1;sp|O08663|MAP2_MOUSE Methionine aminopeptidase 2 OS=Mus musculus OX=10090 GN=Metap2 PE=1 SV=1;tr|Q3TMN1|Q3TMN1_MOUSE Methionine aminopeptidase 2 OS=Mus musculus	7	7	7	7	1	4	2	2	5	7	3	3	4	1	4	2	2	5	7	3	3	4	1	4	2	2	5	7	3	3	4	17.8	17.8	17.8	54.117	488	488;478;455;233;242;186;106	0	15.999
Q6GT24	ENSMUSG00000026701	11758	Q6GT24;O08709;D3Z0Y2;Q8BG37;A0A0A6YXQ7	Q6GT24;O08709;D3Z0Y2;Q8BG37	6;6;5;3;1	6;6;5;3;1	6;6;5;3;1	Peroxiredoxin-6	Prdx6;Prdx6b	tr|Q6GT24|Q6GT24_MOUSE Peroxiredoxin-6 OS=Mus musculus OX=10090 GN=Prdx6 PE=1 SV=1;sp|O08709|PRDX6_MOUSE Peroxiredoxin-6 OS=Mus musculus OX=10090 GN=Prdx6 PE=1 SV=3;tr|D3Z0Y2|D3Z0Y2_MOUSE Peroxiredoxin-6 OS=Mus musculus OX=10090 GN=Prdx6 PE=1 SV=1;tr|Q8BG3	5	6	6	6	2	4	4	2	0	0	2	4	1	2	4	4	2	0	0	2	4	1	2	4	4	2	0	0	2	4	1	32.6	32.6	32.6	24.826	224	224;224;200;224;76	0	21.121
O08807	ENSMUSG00000025289	53381	O08807;B1AZS9	O08807;B1AZS9	3;2	1;1	1;1	Peroxiredoxin-4	Prdx4	sp|O08807|PRDX4_MOUSE Peroxiredoxin-4 OS=Mus musculus OX=10090 GN=Prdx4 PE=1 SV=1;tr|B1AZS9|B1AZS9_MOUSE Peroxiredoxin-4 (Fragment) OS=Mus musculus OX=10090 GN=Prdx4 PE=1 SV=1	2	3	1	1	3	3	3	3	3	3	3	3	3	1	1	1	1	1	1	1	1	1	1	1	1	1	1	1	1	1	1	10.6	4	4	31.052	274	274;229	0	6.016
O09106	ENSMUSG00000028800	433759	O09106	O09106	10	10	7	Histone deacetylase 1	Hdac1	sp|O09106|HDAC1_MOUSE Histone deacetylase 1 OS=Mus musculus OX=10090 GN=Hdac1 PE=1 SV=1	1	10	10	7	4	5	4	4	4	5	4	5	8	4	5	4	4	4	5	4	5	8	3	3	3	3	3	3	3	4	6	28	28	21.4	55.074	482	482	0	36.728
Q9CQM8	ENSMUSG00000041453	19933	Q9CQM8;O09167	Q9CQM8;O09167	7;7	7;7	7;7	60S ribosomal protein L21	Rpl21	tr|Q9CQM8|Q9CQM8_MOUSE 60S ribosomal protein L21 OS=Mus musculus OX=10090 GN=Rpl21 PE=1 SV=1;sp|O09167|RL21_MOUSE 60S ribosomal protein L21 OS=Mus musculus OX=10090 GN=Rpl21 PE=1 SV=3	2	7	7	7	6	5	4	5	5	5	4	5	6	6	5	4	5	5	5	4	5	6	6	5	4	5	5	5	4	5	6	36.9	36.9	36.9	18.579	160	160;160	0	133.53
O35129	ENSMUSG00000004264	12034	O35129;F6QPR1;F6Q8V7	O35129;F6QPR1	3;2;1	3;2;1	3;2;1	Prohibitin-2	Phb2	sp|O35129|PHB2_MOUSE Prohibitin-2 OS=Mus musculus OX=10090 GN=Phb2 PE=1 SV=1;tr|F6QPR1|F6QPR1_MOUSE Prohibitin (Fragment) OS=Mus musculus OX=10090 GN=Phb2 PE=1 SV=1	3	3	3	3	1	2	0	0	0	1	0	1	0	1	2	0	0	0	1	0	1	0	1	2	0	0	0	1	0	1	0	13	13	13	33.296	299	299;157;104	0	8.7467
O35130	ENSMUSG00000004268	14791	O35130;A0A0N4SUL6	O35130;A0A0N4SUL6	8;4	8;4	8;4	Ribosomal RNA small subunit methyltransferase NEP1	Emg1	sp|O35130|NEP1_MOUSE Ribosomal RNA small subunit methyltransferase NEP1 OS=Mus musculus OX=10090 GN=Emg1 PE=1 SV=1;tr|A0A0N4SUL6|A0A0N4SUL6_MOUSE Ribosomal RNA small subunit methyltransferase NEP1 (Fragment) OS=Mus musculus OX=10090 GN=Emg1 PE=1 SV=1	2	8	8	8	4	2	5	6	6	4	5	5	6	4	2	5	6	6	4	5	5	6	4	2	5	6	6	4	5	5	6	38.9	38.9	38.9	26.974	244	244;122	0	25.328
O35218	ENSMUSG00000041781	51786	O35218	O35218	1	1	1	Cleavage and polyadenylation specificity factor subunit 2	Cpsf2	sp|O35218|CPSF2_MOUSE Cleavage and polyadenylation specificity factor subunit 2 OS=Mus musculus OX=10090 GN=Cpsf2 PE=1 SV=1	1	1	1	1	0	0	0	1	0	0	0	0	0	0	0	0	1	0	0	0	0	0	0	0	0	1	0	0	0	0	0	2.6	2.6	2.6	88.382	782	782	0.0013937	3.6106
O35286	ENSMUSG00000029169	13204	O35286;Q497W9;A0A0G2JG10;A0A0G2JGQ5;Q05BH3;G3X8X0	O35286;Q497W9;A0A0G2JG10	24;21;20;9;1;1	24;21;20;9;1;1	23;20;19;9;0;0	Pre-mRNA-splicing factor ATP-dependent RNA helicase DHX15	Dhx15	sp|O35286|DHX15_MOUSE Pre-mRNA-splicing factor ATP-dependent RNA helicase DHX15 OS=Mus musculus OX=10090 GN=Dhx15 PE=1 SV=2;tr|Q497W9|Q497W9_MOUSE DEAH (Asp-Glu-Ala-His) box polypeptide 15 OS=Mus musculus OX=10090 GN=Dhx15 PE=1 SV=1;tr|A0A0G2JG10|A0A0G2JG1	6	24	24	23	20	18	21	20	19	18	17	21	21	20	18	21	20	19	18	17	21	21	19	17	20	19	18	17	16	20	20	36.6	36.6	35.5	91.006	795	795;703;608;186;741;1044	0	92.389
O35295	ENSMUSG00000094483	19291	O35295	O35295	4	4	4	Transcriptional activator protein Pur-beta	Purb	sp|O35295|PURB_MOUSE Transcriptional activator protein Pur-beta OS=Mus musculus OX=10090 GN=Purb PE=1 SV=3	1	4	4	4	2	1	3	2	2	4	3	2	2	2	1	3	2	2	4	3	2	2	2	1	3	2	2	4	3	2	2	24.4	24.4	24.4	33.901	324	324	0	59.076
Q9D8S5	ENSMUSG00000021134	20384	Q9D8S5;O35326	Q9D8S5;O35326	4;4	3;3	3;3	Serine/arginine-rich splicing factor 5	Srsf5	tr|Q9D8S5|Q9D8S5_MOUSE Serine/arginine-rich-splicing factor 5 OS=Mus musculus OX=10090 GN=Srsf5 PE=1 SV=1;sp|O35326|SRSF5_MOUSE Serine/arginine-rich splicing factor 5 OS=Mus musculus OX=10090 GN=Srsf5 PE=1 SV=2	2	4	3	3	4	4	4	2	3	2	3	3	3	3	3	3	1	2	1	2	2	2	3	3	3	1	2	1	2	2	2	17	13.7	13.7	30.978	270	270;269	0	10.673
Q4FJZ2	ENSMUSG00000003731	16650	Q4FJZ2;O35345	Q4FJZ2;O35345	5;5	5;5	2;2	Importin subunit alpha;Importin subunit alpha-7	Kpna6	tr|Q4FJZ2|Q4FJZ2_MOUSE Importin subunit alpha OS=Mus musculus OX=10090 GN=Kpna6 PE=1 SV=1;sp|O35345|IMA7_MOUSE Importin subunit alpha-7 OS=Mus musculus OX=10090 GN=Kpna6 PE=1 SV=2	2	5	5	2	3	3	2	3	1	1	3	2	4	3	3	2	3	1	1	3	2	4	1	1	1	0	0	0	1	1	2	13.7	13.7	5.6	59.602	533	533;536	0	35.35
O35350	ENSMUSG00000024942	12333	O35350	O35350	2	2	2	Calpain-1 catalytic subunit	Capn1	sp|O35350|CAN1_MOUSE Calpain-1 catalytic subunit OS=Mus musculus OX=10090 GN=Capn1 PE=1 SV=1	1	2	2	2	0	2	0	0	0	0	0	0	0	0	2	0	0	0	0	0	0	0	0	2	0	0	0	0	0	0	0	3.1	3.1	3.1	82.105	713	713	0.0014503	4.2184
O35593	ENSMUSG00000026914	59029	O35593	O35593	1	1	1	26S proteasome non-ATPase regulatory subunit 14	Psmd14	sp|O35593|PSDE_MOUSE 26S proteasome non-ATPase regulatory subunit 14 OS=Mus musculus OX=10090 GN=Psmd14 PE=1 SV=2	1	1	1	1	1	1	1	1	0	0	1	0	1	1	1	1	1	0	0	1	0	1	1	1	1	1	0	0	1	0	1	4.2	4.2	4.2	34.577	310	310	0.0014006	3.6499
Q921D0	ENSMUSG00000021950	11752	Q921D0;O35640	Q921D0;O35640	2;2	2;2	2;2	Annexin;Annexin A8	Anxa8	tr|Q921D0|Q921D0_MOUSE Annexin OS=Mus musculus OX=10090 GN=Anxa8 PE=1 SV=1;sp|O35640|ANXA8_MOUSE Annexin A8 OS=Mus musculus OX=10090 GN=Anxa8 PE=1 SV=2	2	2	2	2	0	2	0	0	0	0	0	0	0	0	2	0	0	0	0	0	0	0	0	2	0	0	0	0	0	0	0	8.6	8.6	8.6	33.758	301	301;327	0	14.4
O35691	ENSMUSG00000020994	18949	O35691;Q3TUQ5;A0A1W2P6S1	O35691;Q3TUQ5	19;19;2	19;19;2	19;19;2	Pinin	Pnn	sp|O35691|PININ_MOUSE Pinin OS=Mus musculus OX=10090 GN=Pnn PE=1 SV=4;tr|Q3TUQ5|Q3TUQ5_MOUSE Pinin OS=Mus musculus OX=10090 GN=Pnn PE=1 SV=1	3	19	19	19	14	10	12	11	7	10	9	8	9	14	10	12	11	7	10	9	8	9	14	10	12	11	7	10	9	8	9	29.1	29.1	29.1	82.435	725	725;726;59	0	72.768
Q8C2Q7	ENSMUSG00000007850	59013	Q8C2Q7;O35737	Q8C2Q7;O35737	12;12	12;12	5;5	Heterogeneous nuclear ribonucleoprotein H;Heterogeneous nuclear ribonucleoprotein H, N-terminally processed	Hnrnph1	tr|Q8C2Q7|Q8C2Q7_MOUSE Heterogeneous nuclear ribonucleoprotein H OS=Mus musculus OX=10090 GN=Hnrnph1 PE=1 SV=1;sp|O35737|HNRH1_MOUSE Heterogeneous nuclear ribonucleoprotein H OS=Mus musculus OX=10090 GN=Hnrnph1 PE=1 SV=3	2	12	12	5	9	8	8	8	8	7	9	10	8	9	8	8	8	8	7	9	10	8	4	3	4	3	3	2	3	4	3	35.4	35.4	16.7	51.217	472	472;449	0	162.16
O35901	ENSMUSG00000007050	27756	O35901;O35900	O35901;O35900	1;1	1;1	1;1	U6 snRNA-associated Sm-like protein LSm2	Lsm2	tr|O35901|O35901_MOUSE G7b alternative form OS=Mus musculus OX=10090 GN=Lsm2 PE=1 SV=1;sp|O35900|LSM2_MOUSE U6 snRNA-associated Sm-like protein LSm2 OS=Mus musculus OX=10090 GN=Lsm2 PE=1 SV=1	2	1	1	1	0	1	0	0	0	0	0	1	0	0	1	0	0	0	0	0	1	0	0	1	0	0	0	0	0	1	0	14.5	14.5	14.5	14.857	131	131;95	0	5.3177
O35972	ENSMUSG00000037772	19935	O35972;A0A1B0GSZ9;A0A1B0GQZ1	O35972;A0A1B0GSZ9	5;4;2	5;4;2	5;4;2	39S ribosomal protein L23, mitochondrial	Mrpl23	sp|O35972|RM23_MOUSE 39S ribosomal protein L23, mitochondrial OS=Mus musculus OX=10090 GN=Mrpl23 PE=1 SV=1;tr|A0A1B0GSZ9|A0A1B0GSZ9_MOUSE 39S ribosomal protein L23, mitochondrial OS=Mus musculus OX=10090 GN=Mrpl23 PE=1 SV=1	3	5	5	5	4	3	4	3	2	3	1	1	1	4	3	4	3	2	3	1	1	1	4	3	4	3	2	3	1	1	1	44.5	44.5	44.5	17.121	146	146;172;101	0	33.859
O54734	ENSMUSG00000028757	13200	O54734	O54734	3	3	3	Dolichyl-diphosphooligosaccharide--protein glycosyltransferase 48 kDa subunit	Ddost	sp|O54734|OST48_MOUSE Dolichyl-diphosphooligosaccharide--protein glycosyltransferase 48 kDa subunit OS=Mus musculus OX=10090 GN=Ddost PE=1 SV=2	1	3	3	3	0	3	0	0	0	0	0	0	0	0	3	0	0	0	0	0	0	0	0	3	0	0	0	0	0	0	0	7	7	7	49.027	441	441	0	5.5183
O54774	ENSMUSG00000020198	11776	O54774	O54774	7	7	7	AP-3 complex subunit delta-1	Ap3d1	sp|O54774|AP3D1_MOUSE AP-3 complex subunit delta-1 OS=Mus musculus OX=10090 GN=Ap3d1 PE=1 SV=1	1	7	7	7	2	2	1	4	4	0	1	5	4	2	2	1	4	4	0	1	5	4	2	2	1	4	4	0	1	5	4	8.2	8.2	8.2	135.08	1199	1199	0	17.969
O54962	ENSMUSG00000024844	23825	O54962	O54962	6	6	6	Barrier-to-autointegration factor;Barrier-to-autointegration factor, N-terminally processed	Banf1	sp|O54962|BAF_MOUSE Barrier-to-autointegration factor OS=Mus musculus OX=10090 GN=Banf1 PE=1 SV=1	1	6	6	6	3	3	3	3	3	5	3	3	4	3	3	3	3	3	5	3	3	4	3	3	3	3	3	5	3	3	4	56.2	56.2	56.2	10.102	89	89	0	147.89
O54984	ENSMUSG00000052456	56495	O54984;A0A1B0GRE1	O54984	3;1	3;1	3;1	ATPase Asna1	Asna1	sp|O54984|GET3_MOUSE ATPase GET3 OS=Mus musculus OX=10090 GN=Get3 PE=1 SV=2	2	3	3	3	1	1	1	1	0	0	1	1	1	1	1	1	1	0	0	1	1	1	1	1	1	1	0	0	1	1	1	9.2	9.2	9.2	38.822	348	348;131	0	6.1558
O55029	ENSMUSG00000032458	50797	O55029	O55029	5	5	5	Coatomer subunit beta	Copb2	sp|O55029|COPB2_MOUSE Coatomer subunit beta OS=Mus musculus OX=10090 GN=Copb2 PE=1 SV=2	1	5	5	5	1	5	1	1	0	0	0	1	1	1	5	1	1	0	0	0	1	1	1	5	1	1	0	0	0	1	1	6.5	6.5	6.5	102.45	905	905	0	13.474
O55135	ENSMUSG00000027613	16418	O55135;A6PWZ2;D6RG53;D6RJJ3;B1AZQ4	O55135	8;2;1;1;1	8;2;1;1;1	8;2;1;1;1	Eukaryotic translation initiation factor 6	Eif6	sp|O55135|IF6_MOUSE Eukaryotic translation initiation factor 6 OS=Mus musculus OX=10090 GN=Eif6 PE=1 SV=2	5	8	8	8	5	5	5	5	5	6	6	4	6	5	5	5	5	5	6	6	4	6	5	5	5	5	5	6	6	4	6	53.5	53.5	53.5	26.511	245	245;58;59;71;81	0	125.3
O55142	ENSMUSG00000060636	57808	O55142	O55142	5	5	5	60S ribosomal protein L35a	Rpl35a	sp|O55142|RL35A_MOUSE 60S ribosomal protein L35a OS=Mus musculus OX=10090 GN=Rpl35a PE=1 SV=2	1	5	5	5	4	5	4	4	4	3	3	5	4	4	5	4	4	4	3	3	5	4	4	5	4	4	4	3	3	5	4	38.2	38.2	38.2	12.554	110	110	0	45.28
O55143-2	ENSMUSG00000029467	11938	O55143-2;O55143	O55143-2;O55143	10;10	10;10	4;4	Sarcoplasmic/endoplasmic reticulum calcium ATPase 2	Atp2a2	sp|O55143-2|AT2A2_MOUSE Isoform 2 of Sarcoplasmic/endoplasmic reticulum calcium ATPase 2 OS=Mus musculus OX=10090 GN=Atp2a2;sp|O55143|AT2A2_MOUSE Sarcoplasmic/endoplasmic reticulum calcium ATPase 2 OS=Mus musculus OX=10090 GN=Atp2a2 PE=1 SV=2	2	10	10	4	3	6	2	1	0	2	1	7	1	3	6	2	1	0	2	1	7	1	0	2	1	1	0	2	0	2	0	11.8	11.8	4.3	109.75	998	998;1044	0	29.094
O55201	ENSMUSG00000003435	20924	O55201;O55201-2	O55201;O55201-2	6;5	6;5	6;5	Transcription elongation factor SPT5	Supt5h	sp|O55201|SPT5H_MOUSE Transcription elongation factor SPT5 OS=Mus musculus OX=10090 GN=Supt5h PE=1 SV=1;sp|O55201-2|SPT5H_MOUSE Isoform 2 of Transcription elongation factor SPT5 OS=Mus musculus OX=10090 GN=Supt5h	2	6	6	6	3	2	1	3	0	2	1	3	3	3	2	1	3	0	2	1	3	3	3	2	1	3	0	2	1	3	3	6.7	6.7	6.7	120.66	1082	1082;888	0	16.51
O70126	ENSMUSG00000020897	20877	O70126	O70126	2	2	2	Aurora kinase B	Aurkb	sp|O70126|AURKB_MOUSE Aurora kinase B OS=Mus musculus OX=10090 GN=Aurkb PE=1 SV=2	1	2	2	2	1	1	1	1	2	1	1	1	1	1	1	1	1	2	1	1	1	1	1	1	1	1	2	1	1	1	1	8.1	8.1	8.1	39.384	345	345	0	4.6646
O70194	ENSMUSG00000016554	55944	O70194;A0A2R8VK20	O70194	11;1	11;1	11;1	Eukaryotic translation initiation factor 3 subunit D	Eif3d	sp|O70194|EIF3D_MOUSE Eukaryotic translation initiation factor 3 subunit D OS=Mus musculus OX=10090 GN=Eif3d PE=1 SV=2	2	11	11	11	5	7	4	4	3	5	5	2	5	5	7	4	4	3	5	5	2	5	5	7	4	4	3	5	5	2	5	28.6	28.6	28.6	63.988	548	548;169	0	63.779
Q80UE4	ENSMUSG00000019978	13822	Q80UE4;Q8C928;O70318;Q80UE5;A0A1W2P6I5;A0A286YDD0;A0A5F8MPR1;A0A3B2WD96;A0A3B2WBE1;A0A5F8MPE1;A7YY80;A0A286YCY8;D0VYV6;Q9WV92;Q9WV92-2;Q9WV92-4;Q9WV92-3;Q9WV92-5;Q9WV92-6;Q9WV92-7;Q9WV92-8	Q80UE4;Q8C928;O70318;Q80UE5;A0A1W2P6I5	6;6;6;6;5;1;1;1;1;1;1;1;1;1;1;1;1;1;1;1;1	6;6;6;6;5;1;1;1;1;1;1;1;1;1;1;1;1;1;1;1;1	6;6;6;6;5;1;1;1;1;1;1;1;1;1;1;1;1;1;1;1;1	Band 4.1-like protein 2	Epb4.1l2;Epb41l2	tr|Q80UE4|Q80UE4_MOUSE Band 4.1-like protein 2 OS=Mus musculus OX=10090 GN=Epb41l2 PE=1 SV=1;tr|Q8C928|Q8C928_MOUSE Band 4.1-like protein 2 (Fragment) OS=Mus musculus OX=10090 GN=Epb41l2 PE=1 SV=1;sp|O70318|E41L2_MOUSE Band 4.1-like protein 2 OS=Mus muscul	21	6	6	6	2	0	3	1	2	2	2	4	4	2	0	3	1	2	2	2	4	4	2	0	3	1	2	2	2	4	4	9.6	9.6	9.6	88.461	794	794;806;988;918;513;53;951;812;819;1052;876;287;911;929;939;894;917;904;882;823;1052	0	13.2
S4R1E5	ENSMUSG00000075706	625249	S4R1E5;O70325-2;O70325;O70325-3	S4R1E5;O70325-2;O70325;O70325-3	4;4;4;4	4;4;4;4	4;4;4;4	Glutathione peroxidase;Phospholipid hydroperoxide glutathione peroxidase, mitochondrial	Gpx4	tr|S4R1E5|S4R1E5_MOUSE Glutathione peroxidase OS=Mus musculus OX=10090 GN=Gpx4 PE=1 SV=1;sp|O70325-2|GPX4_MOUSE Isoform Cytoplasmic of Phospholipid hydroperoxide glutathione peroxidase OS=Mus musculus OX=10090 GN=Gpx4;sp|O70325|GPX4_MOUSE Phospholipid hydr	4	4	4	4	0	1	2	3	0	1	2	3	2	0	1	2	3	0	1	2	3	2	0	1	2	3	0	1	2	3	2	27.4	27.4	27.4	17.937	157	157;170;197;253	0	8.2741
O70435	ENSMUSG00000060073	19167	O70435;E0CX62	O70435;E0CX62	3;2	3;2	3;2	Proteasome subunit alpha type-3	Psma3	sp|O70435|PSA3_MOUSE Proteasome subunit alpha type-3 OS=Mus musculus OX=10090 GN=Psma3 PE=1 SV=3;tr|E0CX62|E0CX62_MOUSE Proteasome subunit alpha type-3 OS=Mus musculus OX=10090 GN=Psma3 PE=1 SV=2	2	3	3	3	0	3	1	0	0	0	0	0	0	0	3	1	0	0	0	0	0	0	0	3	1	0	0	0	0	0	0	12.5	12.5	12.5	28.405	255	255;180	0	7.3923
O70456	ENSMUSG00000047281	55948	O70456	O70456	11	9	9	14-3-3 protein sigma	Sfn	sp|O70456|1433S_MOUSE 14-3-3 protein sigma OS=Mus musculus OX=10090 GN=Sfn PE=1 SV=2	1	11	9	9	3	11	3	1	1	1	2	5	1	2	9	1	1	1	1	1	4	1	2	9	1	1	1	1	1	4	1	48.8	41.5	41.5	27.706	248	248	0	282.33
O70551	ENSMUSG00000004865	20815	O70551;A0A3B2W883;A0A3B2W430;A0A3B2W4B9;F8WGJ7;A0A3B2W7I6;B2KF32	O70551	24;11;10;9;8;6;2	24;11;10;9;8;6;2	21;10;9;8;7;6;2	SRSF protein kinase 1	Srpk1	sp|O70551|SRPK1_MOUSE SRSF protein kinase 1 OS=Mus musculus OX=10090 GN=Srpk1 PE=1 SV=2	7	24	24	21	17	17	17	15	19	20	17	19	20	17	17	17	15	19	20	17	19	20	14	14	14	13	16	17	15	16	17	48.8	48.8	44.3	73.088	648	648;345;280;307;223;146;35	0	303.83
O88342	ENSMUSG00000005103	22388	O88342	O88342	2	2	2	WD repeat-containing protein 1	Wdr1	sp|O88342|WDR1_MOUSE WD repeat-containing protein 1 OS=Mus musculus OX=10090 GN=Wdr1 PE=1 SV=3	1	2	2	2	0	2	0	0	0	0	0	0	0	0	2	0	0	0	0	0	0	0	0	2	0	0	0	0	0	0	0	5.3	5.3	5.3	66.406	606	606	0	6.9248
O88477	ENSMUSG00000013415	140486	O88477	O88477	24	24	24	Insulin-like growth factor 2 mRNA-binding protein 1	Igf2bp1	sp|O88477|IF2B1_MOUSE Insulin-like growth factor 2 mRNA-binding protein 1 OS=Mus musculus OX=10090 GN=Igf2bp1 PE=1 SV=1	1	24	24	24	19	12	19	20	18	17	17	17	20	19	12	19	20	18	17	17	17	20	19	12	19	20	18	17	17	17	20	47.1	47.1	47.1	63.45	577	577	0	169.66
O88532	ENSMUSG00000022201	22763	O88532;F6QJP7;F6V459;D3Z5G4	O88532	19;9;3;2	19;9;3;2	19;9;3;2	Zinc finger RNA-binding protein	Zfr	sp|O88532|ZFR_MOUSE Zinc finger RNA-binding protein OS=Mus musculus OX=10090 GN=Zfr PE=1 SV=2	4	19	19	19	11	10	15	12	13	14	11	13	13	11	10	15	12	13	14	11	13	13	11	10	15	12	13	14	11	13	13	24.6	24.6	24.6	116.86	1074	1074;299;115;351	0	216.57
O88554	ENSMUSG00000036023	11546	O88554	O88554	1	1	1	Poly [ADP-ribose] polymerase 2	Parp2	sp|O88554|PARP2_MOUSE Poly [ADP-ribose] polymerase 2 OS=Mus musculus OX=10090 GN=Parp2 PE=1 SV=3	1	1	1	1	0	0	0	0	1	1	0	0	1	0	0	0	0	1	1	0	0	1	0	0	0	0	1	1	0	0	1	2.1	2.1	2.1	63.396	559	559	0.0091855	2.4375
O88569	ENSMUSG00000004980	53379	O88569;O88569-2;O88569-3;A0A0N4SUM2	O88569;O88569-2;O88569-3	13;12;11;5	13;12;11;5	13;12;11;5	Heterogeneous nuclear ribonucleoproteins A2/B1	Hnrnpa2b1	sp|O88569|ROA2_MOUSE Heterogeneous nuclear ribonucleoproteins A2/B1 OS=Mus musculus OX=10090 GN=Hnrnpa2b1 PE=1 SV=2;sp|O88569-2|ROA2_MOUSE Isoform 2 of Heterogeneous nuclear ribonucleoproteins A2/B1 OS=Mus musculus OX=10090 GN=Hnrnpa2b1;sp|O88569-3|ROA2_MO	4	13	13	13	10	12	6	10	8	7	9	8	10	10	12	6	10	8	7	9	8	10	10	12	6	10	8	7	9	8	10	50.7	50.7	50.7	37.402	353	353;341;301;155	0	323.31
O88587-2	ENSMUSG00000000326	12846	O88587-2;O88587	O88587-2;O88587	1;1	1;1	1;1	Catechol O-methyltransferase	Comt	sp|O88587-2|COMT_MOUSE Isoform Soluble of Catechol O-methyltransferase OS=Mus musculus OX=10090 GN=Comt;sp|O88587|COMT_MOUSE Catechol O-methyltransferase OS=Mus musculus OX=10090 GN=Comt PE=1 SV=2	2	1	1	1	0	1	0	0	0	0	0	0	0	0	1	0	0	0	0	0	0	0	0	1	0	0	0	0	0	0	0	6.8	6.8	6.8	24.707	222	222;265	0.0075235	2.5793
O88665	ENSMUSG00000031660	26992	O88665	O88665	4	4	4	Bromodomain-containing protein 7	Brd7	sp|O88665|BRD7_MOUSE Bromodomain-containing protein 7 OS=Mus musculus OX=10090 GN=Brd7 PE=1 SV=1	1	4	4	4	0	0	0	1	1	1	0	1	0	0	0	0	1	1	1	0	1	0	0	0	0	1	1	1	0	1	0	8.4	8.4	8.4	73.999	651	651	0	7.6513
O88708	ENSMUSG00000026761	26428	O88708;Q9CZF7;A2AI40	O88708;Q9CZF7;A2AI40	2;1;1	2;1;1	2;1;1	Origin recognition complex subunit 4	Orc4	sp|O88708|ORC4_MOUSE Origin recognition complex subunit 4 OS=Mus musculus OX=10090 GN=Orc4 PE=1 SV=2;tr|Q9CZF7|Q9CZF7_MOUSE Origin recognition complex subunit 4 OS=Mus musculus OX=10090 GN=Orc4 PE=1 SV=1;tr|A2AI40|A2AI40_MOUSE Origin recognition complex su	3	2	2	2	0	0	0	1	0	0	1	0	1	0	0	0	1	0	0	1	0	1	0	0	0	1	0	0	1	0	1	6.2	6.2	6.2	49.981	433	433;138;237	0.0014306	4.0283
O88796	ENSMUSG00000024800	54364	O88796	O88796	9	9	9	Ribonuclease P protein subunit p30	Rpp30	sp|O88796|RPP30_MOUSE Ribonuclease P protein subunit p30 OS=Mus musculus OX=10090 GN=Rpp30 PE=1 SV=1	1	9	9	9	4	4	3	4	3	3	3	2	5	4	4	3	4	3	3	3	2	5	4	4	3	4	3	3	3	2	5	39.2	39.2	39.2	29.473	268	268	0	21.528
O88844	ENSMUSG00000025950	15926	O88844;D3YVY3;A0A0U1RP68;A0A087WPT4;A0A087WRS9;D6RIL6	O88844	3;1;1;1;1;1	3;1;1;1;1;1	2;0;0;0;0;0	Isocitrate dehydrogenase [NADP] cytoplasmic	Idh1	sp|O88844|IDHC_MOUSE Isocitrate dehydrogenase [NADP] cytoplasmic OS=Mus musculus OX=10090 GN=Idh1 PE=1 SV=2	6	3	3	2	1	3	1	0	0	1	1	0	1	1	3	1	0	0	1	1	0	1	1	2	1	0	0	1	1	0	1	8.2	8.2	6	46.674	414	414;143;150;187;202;294	0	13.89
O88990	ENSMUSG00000006457	11474	O88990	O88990	11	2	2	Alpha-actinin-3	Actn3	sp|O88990|ACTN3_MOUSE Alpha-actinin-3 OS=Mus musculus OX=10090 GN=Actn3 PE=2 SV=1	1	11	2	2	6	7	0	0	0	0	0	2	0	2	0	0	0	0	0	0	0	0	2	0	0	0	0	0	0	0	0	14	2.4	2.4	103.04	900	900	0.0014194	3.8858
O89094-2	ENSMUSG00000005355	12365	O89094-2;O89094	O89094-2;O89094	2;2	2;2	2;2	Caspase-14;Caspase-14 subunit p17, mature form;Caspase-14 subunit p10, mature form;Caspase-14 subunit p20, intermediate form;Caspase-14 subunit p8, intermediate form	Casp14	sp|O89094-2|CASPE_MOUSE Isoform 2 of Caspase-14 OS=Mus musculus OX=10090 GN=Casp14;sp|O89094|CASPE_MOUSE Caspase-14 OS=Mus musculus OX=10090 GN=Casp14 PE=1 SV=1	2	2	2	2	0	2	1	0	0	0	0	0	0	0	2	1	0	0	0	0	0	0	0	2	1	0	0	0	0	0	0	9.4	9.4	9.4	18.223	159	159;257	0	4.5988
P00493	ENSMUSG00000025630	15452	P00493	P00493	1	1	1	Hypoxanthine-guanine phosphoribosyltransferase	Hprt1	sp|P00493|HPRT_MOUSE Hypoxanthine-guanine phosphoribosyltransferase OS=Mus musculus OX=10090 GN=Hprt1 PE=1 SV=3	1	1	1	1	0	1	0	0	0	0	0	0	0	0	1	0	0	0	0	0	0	0	0	1	0	0	0	0	0	0	0	6	6	6	24.57	218	218	0.0087282	2.5346
P00920	ENSMUSG00000027562	12349	P00920	P00920	1	1	1	Carbonic anhydrase 2	Ca2	sp|P00920|CAH2_MOUSE Carbonic anhydrase 2 OS=Mus musculus OX=10090 GN=Ca2 PE=1 SV=4	1	1	1	1	0	1	0	0	0	0	0	0	0	0	1	0	0	0	0	0	0	0	0	1	0	0	0	0	0	0	0	6.2	6.2	6.2	29.032	260	260	0.0086849	2.5172
Q91VB8	ENSMUSG00000069919	15122	Q91VB8;P01942	Q91VB8;P01942	4;4	4;4	3;3	Hemoglobin subunit alpha	haemaglobin alpha 2;Hba	tr|Q91VB8|Q91VB8_MOUSE Alpha globin 1 OS=Mus musculus OX=10090 GN=Hba-a1 PE=1 SV=1;sp|P01942|HBA_MOUSE Hemoglobin subunit alpha OS=Mus musculus OX=10090 GN=Hba PE=1 SV=2	2	4	4	3	1	2	1	3	0	0	1	0	1	1	2	1	3	0	0	1	0	1	0	1	1	2	0	0	1	0	1	35.2	35.2	30.3	15.112	142	142;142	0	31.537
P02301			P02301;P84244;E0CZ27	P02301;P84244;E0CZ27	6;6;5	6;6;5	1;1;1	Histone H3.3C;Histone H3.3;Histone H3	H3f3c;H3f3a	sp|P02301|H3C_MOUSE Histone H3.3C OS=Mus musculus OX=10090 GN=H3-5 PE=3 SV=3;sp|P84244|H33_MOUSE Histone H3.3 OS=Mus musculus OX=10090 GN=H3-3a PE=1 SV=2;tr|E0CZ27|E0CZ27_MOUSE Histone H3 (Fragment) OS=Mus musculus OX=10090 GN=H3f3a PE=3 SV=1	3	6	6	1	5	4	5	5	3	4	6	4	6	5	4	5	5	3	4	6	4	6	1	0	1	0	0	0	1	1	1	45.6	45.6	23.5	15.315	136	136;136;119	0	309.22
P04104	ENSMUSG00000046834	16678	P04104	P04104	19	12	11	Keratin, type II cytoskeletal 1	Krt1	sp|P04104|K2C1_MOUSE Keratin, type II cytoskeletal 1 OS=Mus musculus OX=10090 GN=Krt1 PE=1 SV=4	1	19	12	11	10	6	11	18	10	6	7	7	6	4	0	4	11	4	0	1	1	0	4	0	4	11	4	0	1	0	0	28.1	22	20.7	65.605	637	637	0	64.247
P04444	ENSMUSG00000052217	15132	P04444;P04443	P04444;P04443	1;1	1;1	1;1	Hemoglobin subunit beta-H1;Hemoglobin subunit beta-H0	Hbb-bh1;Hbb-bh0	sp|P04444|HBBZ_MOUSE Hemoglobin subunit beta-H1 OS=Mus musculus OX=10090 GN=Hbb-bh1 PE=2 SV=3;sp|P04443|HBB0_MOUSE Hemoglobin subunit beta-H0 OS=Mus musculus OX=10090 GN=Hbb-bh0 PE=2 SV=5	2	1	1	1	0	0	0	0	0	0	0	1	0	0	0	0	0	0	0	0	1	0	0	0	0	0	0	0	0	1	0	6.8	6.8	6.8	16.494	147	147;147	0.0019595	2.9229
P05063	ENSMUSG00000017390	11676	P05063	P05063	4	3	3	Fructose-bisphosphate aldolase C	Aldoc	sp|P05063|ALDOC_MOUSE Fructose-bisphosphate aldolase C OS=Mus musculus OX=10090 GN=Aldoc PE=1 SV=4	1	4	3	3	1	4	1	1	0	0	1	0	1	0	3	0	0	0	0	0	0	0	0	3	0	0	0	0	0	0	0	16.3	8.8	8.8	39.394	363	363	0	6.6024
P05202	ENSMUSG00000031672	14719	P05202	P05202	2	2	2	Aspartate aminotransferase, mitochondrial	Got2	sp|P05202|AATM_MOUSE Aspartate aminotransferase, mitochondrial OS=Mus musculus OX=10090 GN=Got2 PE=1 SV=1	1	2	2	2	0	2	0	0	0	0	0	0	0	0	2	0	0	0	0	0	0	0	0	2	0	0	0	0	0	0	0	5.3	5.3	5.3	47.411	430	430	0	4.6227
P05213	ENSMUSG00000023004	22143	P05213;A0A2R8VHF3	P05213;A0A2R8VHF3	19;10	19;10	0;0	Tubulin alpha-1B chain	Tuba1b	sp|P05213|TBA1B_MOUSE Tubulin alpha-1B chain OS=Mus musculus OX=10090 GN=Tuba1b PE=1 SV=2;tr|A0A2R8VHF3|A0A2R8VHF3_MOUSE Tubulin alpha chain (Fragment) OS=Mus musculus OX=10090 GN=Gm49450 PE=3 SV=1	2	19	19	0	17	18	16	16	15	15	16	16	16	17	18	16	16	15	15	16	16	16	0	0	0	0	0	0	0	0	0	56.3	56.3	0	50.151	451	451;267	0	323.31
P05214	ENSMUSG00000067702	22144	P05214	P05214	19	5	2	Tubulin alpha-3 chain	Tuba3a	sp|P05214|TBA3_MOUSE Tubulin alpha-3 chain OS=Mus musculus OX=10090 GN=Tuba3a PE=1 SV=1	1	19	5	2	18	18	17	17	15	15	17	17	17	5	5	5	5	5	4	5	5	5	2	2	2	2	2	2	2	2	2	56.4	13.1	5.3	49.959	450	450	0	54.919
P06801	ENSMUSG00000032418	17436	P06801;Q3TQP6	P06801;Q3TQP6	4;3	4;3	4;3	NADP-dependent malic enzyme;Malic enzyme	Me1	sp|P06801|MAOX_MOUSE NADP-dependent malic enzyme OS=Mus musculus OX=10090 GN=Me1 PE=1 SV=2;tr|Q3TQP6|Q3TQP6_MOUSE Malic enzyme OS=Mus musculus OX=10090 GN=Me1 PE=1 SV=1	2	4	4	4	0	4	0	0	0	0	0	0	0	0	4	0	0	0	0	0	0	0	0	4	0	0	0	0	0	0	0	7	7	7	63.953	572	572;552	0	8.8387
P07356	ENSMUSG00000032231	12306	P07356;B0V2N7;B0V2N8;B0V2N5	P07356;B0V2N7;B0V2N8;B0V2N5	15;11;9;8	15;11;9;8	15;11;9;8	Annexin A2;Annexin	Anxa2	sp|P07356|ANXA2_MOUSE Annexin A2 OS=Mus musculus OX=10090 GN=Anxa2 PE=1 SV=2;tr|B0V2N7|B0V2N7_MOUSE Annexin (Fragment) OS=Mus musculus OX=10090 GN=Anxa2 PE=1 SV=1;tr|B0V2N8|B0V2N8_MOUSE Annexin (Fragment) OS=Mus musculus OX=10090 GN=Anxa2 PE=1 SV=1;tr|B0V2	4	15	15	15	9	14	9	6	7	7	5	6	9	9	14	9	6	7	7	5	6	9	9	14	9	6	7	7	5	6	9	49.6	49.6	49.6	38.676	339	339;196;176;272	0	265.77
P07742	ENSMUSG00000030978	20133	P07742	P07742	10	10	10	Ribonucleoside-diphosphate reductase large subunit	Rrm1	sp|P07742|RIR1_MOUSE Ribonucleoside-diphosphate reductase large subunit OS=Mus musculus OX=10090 GN=Rrm1 PE=1 SV=2	1	10	10	10	6	6	7	7	4	2	6	7	8	6	6	7	7	4	2	6	7	8	6	6	7	7	4	2	6	7	8	14.6	14.6	14.6	90.209	792	792	0	32.246
P07901	ENSMUSG00000021270	15519	P07901;B7ZC50;A2A6A2;B7ZC49;REV__Q8BL66	P07901	26;6;3;3;1	17;3;2;2;0	17;3;2;2;0	Heat shock protein HSP 90-alpha	Hsp90aa1	sp|P07901|HS90A_MOUSE Heat shock protein HSP 90-alpha OS=Mus musculus OX=10090 GN=Hsp90aa1 PE=1 SV=4	5	26	17	17	15	17	15	16	14	15	15	16	18	9	10	10	10	7	9	11	11	13	9	10	10	10	7	9	11	11	13	38.2	26.6	26.6	84.787	733	733;201;98;103;1411	0	189.79
P08113	ENSMUSG00000020048	22027	P08113;F7C312	P08113	9;4	8;4	8;4	Endoplasmin	Hsp90b1	sp|P08113|ENPL_MOUSE Endoplasmin OS=Mus musculus OX=10090 GN=Hsp90b1 PE=1 SV=2	2	9	8	8	1	9	1	1	1	1	1	1	1	0	8	0	0	0	0	0	0	0	0	8	0	0	0	0	0	0	0	12.5	11	11	92.475	802	802;373	0	30.939
P08249	ENSMUSG00000019179	17448	P08249;A0A0G2JF23;A0A0G2JGY4	P08249;A0A0G2JF23	4;2;1	4;2;1	4;2;1	Malate dehydrogenase, mitochondrial	Mdh2	sp|P08249|MDHM_MOUSE Malate dehydrogenase, mitochondrial OS=Mus musculus OX=10090 GN=Mdh2 PE=1 SV=3;tr|A0A0G2JF23|A0A0G2JF23_MOUSE Malate dehydrogenase (Fragment) OS=Mus musculus OX=10090 GN=Mdh2 PE=1 SV=1	3	4	4	4	0	4	0	0	0	0	0	0	0	0	4	0	0	0	0	0	0	0	0	4	0	0	0	0	0	0	0	14.2	14.2	14.2	35.611	338	338;199;153	0	9.4358
P09103	ENSMUSG00000025130	18453	P09103;E9Q8G8	P09103	10;4	10;4	10;4	Protein disulfide-isomerase	P4hb	sp|P09103|PDIA1_MOUSE Protein disulfide-isomerase OS=Mus musculus OX=10090 GN=P4hb PE=1 SV=2	2	10	10	10	0	10	0	0	0	0	0	0	0	0	10	0	0	0	0	0	0	0	0	10	0	0	0	0	0	0	0	20.8	20.8	20.8	57.058	509	509;165	0	38.75
P09405	ENSMUSG00000026234	17975	P09405;A0A087WRM5	P09405	25;2	25;2	25;2	Nucleolin	Ncl	sp|P09405|NUCL_MOUSE Nucleolin OS=Mus musculus OX=10090 GN=Ncl PE=1 SV=2	2	25	25	25	20	22	19	21	23	21	20	19	23	20	22	19	21	23	21	20	19	23	20	22	19	21	23	21	20	19	23	34.1	34.1	34.1	76.722	707	707;76	0	317.46
P09411	ENSMUSG00000062070	18655	P09411;S4R2M7;P09041	P09411;S4R2M7	9;5;3	9;5;3	9;5;3	Phosphoglycerate kinase 1;Phosphoglycerate kinase	Pgk1	sp|P09411|PGK1_MOUSE Phosphoglycerate kinase 1 OS=Mus musculus OX=10090 GN=Pgk1 PE=1 SV=4;tr|S4R2M7|S4R2M7_MOUSE Phosphoglycerate kinase OS=Mus musculus OX=10090 GN=Pgk1 PE=1 SV=1	3	9	9	9	0	9	1	0	0	0	0	0	0	0	9	1	0	0	0	0	0	0	0	9	1	0	0	0	0	0	0	27.8	27.8	27.8	44.55	417	417;255;417	0	77.841
P09671	ENSMUSG00000006818	20656	P09671	P09671	1	1	1	Superoxide dismutase [Mn], mitochondrial	Sod2	sp|P09671|SODM_MOUSE Superoxide dismutase [Mn], mitochondrial OS=Mus musculus OX=10090 GN=Sod2 PE=1 SV=3	1	1	1	1	0	1	0	0	0	0	0	0	0	0	1	0	0	0	0	0	0	0	0	1	0	0	0	0	0	0	0	6.3	6.3	6.3	24.603	222	222	0	8.2303
Q3THW5	ENSMUSG00000041126	77605	Q3THW5;P0C0S6;Q8R029;Q3UA95;G3UWL7	Q3THW5;P0C0S6;Q8R029;Q3UA95	5;5;3;3;2	5;5;3;3;2	3;3;2;2;1	Histone H2A.V;Histone H2A.Z;Histone H2A	H2afv;H2afz	sp|Q3THW5|H2AV_MOUSE Histone H2A.V OS=Mus musculus OX=10090 GN=H2az2 PE=1 SV=3;sp|P0C0S6|H2AZ_MOUSE Histone H2A.Z OS=Mus musculus OX=10090 GN=H2az1 PE=1 SV=2;tr|Q8R029|Q8R029_MOUSE Histone H2A OS=Mus musculus OX=10090 GN=H2az2 PE=2 SV=1;tr|Q3UA95|Q3UA95_MO	5	5	5	3	4	4	4	4	5	4	4	4	4	4	4	4	4	5	4	4	4	4	2	2	2	2	3	2	2	2	2	53.9	53.9	41.4	13.509	128	128;128;90;105;87	0	28.754
P0CG14	ENSMUSG00000117748	116621581	P0CG14	P0CG14	2	2	2	Chromosome transmission fidelity protein 8 homolog isoform 2	Chtf8	sp|P0CG14|DERPC_MOUSE Decreased expression in renal and prostate cancer protein OS=Mus musculus OX=10090 GN=Derpc PE=1 SV=1	1	2	2	2	0	0	0	1	1	1	0	0	0	0	0	0	1	1	1	0	0	0	0	0	0	1	1	1	0	0	0	7.1	7.1	7.1	52.244	533	533	0	7.0771
P0DP28	ENSMUSG00000019370	12315	P0DP28;P0DP27;P0DP26;A0A3Q4EHJ0;Q9D6P8;A0A1Y7VK66;P20801	P0DP28;P0DP27;P0DP26;A0A3Q4EHJ0;Q9D6P8	5;5;5;3;3;2;1	5;5;5;3;3;2;1	5;5;5;3;3;2;1	Calmodulin-like protein 3	Calml3	sp|P0DP28|CALM3_MOUSE Calmodulin-3 OS=Mus musculus OX=10090 GN=Calm3 PE=1 SV=1;sp|P0DP27|CALM2_MOUSE Calmodulin-2 OS=Mus musculus OX=10090 GN=Calm2 PE=1 SV=1;sp|P0DP26|CALM1_MOUSE Calmodulin-1 OS=Mus musculus OX=10090 GN=Calm1 PE=1 SV=1;tr|A0A3Q4EHJ0|A0A3Q	7	5	5	5	0	5	0	0	0	0	0	2	0	0	5	0	0	0	0	0	2	0	0	5	0	0	0	0	0	2	0	28.9	28.9	28.9	16.837	149	149;149;149;113;149;115;160	0	15.065
P10107	ENSMUSG00000024659	16952	P10107;A0A494BBD8	P10107;A0A494BBD8	5;4	5;4	5;4	Annexin A1	Anxa1	sp|P10107|ANXA1_MOUSE Annexin A1 OS=Mus musculus OX=10090 GN=Anxa1 PE=1 SV=2;tr|A0A494BBD8|A0A494BBD8_MOUSE Annexin OS=Mus musculus OX=10090 GN=Anxa1 PE=1 SV=1	2	5	5	5	1	5	0	1	0	0	0	0	0	1	5	0	1	0	0	0	0	0	1	5	0	1	0	0	0	0	0	15	15	15	38.734	346	346;302	0	24.557
P10126	ENSMUSG00000037742	13627	P10126;D3YZ68;D3Z3I8;P62631	P10126;D3YZ68	19;10;7;7	19;10;7;7	19;10;7;7	Elongation factor 1-alpha 1	Eef1a1	sp|P10126|EF1A1_MOUSE Elongation factor 1-alpha 1 OS=Mus musculus OX=10090 GN=Eef1a1 PE=1 SV=3;tr|D3YZ68|D3YZ68_MOUSE Elongation factor 1-alpha 1 (Fragment) OS=Mus musculus OX=10090 GN=Eef1a1 PE=1 SV=1	4	19	19	19	17	15	17	16	14	16	14	16	17	17	15	17	16	14	16	14	16	17	17	15	17	16	14	16	14	16	17	39.8	39.8	39.8	50.113	462	462;249;186;463	0	316.76
P10639	ENSMUSG00000028367	22166	P10639	P10639	3	3	3	Thioredoxin	Txn	sp|P10639|THIO_MOUSE Thioredoxin OS=Mus musculus OX=10090 GN=Txn PE=1 SV=3	1	3	3	3	0	3	1	0	0	2	0	0	0	0	3	1	0	0	2	0	0	0	0	3	1	0	0	2	0	0	0	35.2	35.2	35.2	11.675	105	105	0	9.0372
Q8CBB6	ENSMUSG00000069307	665596	Q8CBB6;Q8CGP1;Q6ZWY9;Q64478;P10853;Q8CGP2;Q64525;Q64475;P10854;Q8CGP2-2	Q8CBB6;Q8CGP1;Q6ZWY9;Q64478;P10853;Q8CGP2;Q64525;Q64475;P10854;Q8CGP2-2	7;7;7;7;7;6;6;6;6;6	7;7;7;7;7;6;6;6;6;6	3;3;3;3;3;2;2;2;2;2	Histone H2B;Histone H2B type 1-K;Histone H2B type 1-C/E/G;Histone H2B type 1-H;Histone H2B type 1-F/J/L;Histone H2B type 1-P;Histone H2B type 2-B;Histone H2B type 1-B;Histone H2B type 1-M	Hist1h2br;Hist1h2bk;Hist1h2bc;Hist1h2bh;Hist1h2bf;Hist1h2bp;Hist2h2bb;Hist1h2bb;Hist1h2bm	tr|Q8CBB6|Q8CBB6_MOUSE Histone H2B OS=Mus musculus OX=10090 GN=H2bc24 PE=2 SV=1;sp|Q8CGP1|H2B1K_MOUSE Histone H2B type 1-K OS=Mus musculus OX=10090 GN=H2bc12 PE=1 SV=3;sp|Q6ZWY9|H2B1C_MOUSE Histone H2B type 1-C/E/G OS=Mus musculus OX=10090 GN=H2bc4 PE=1 SV	10	7	7	3	6	6	6	6	6	7	6	6	7	6	6	6	6	6	7	6	6	7	2	2	2	2	2	3	2	2	3	47	47	15.7	14.888	134	134;126;126;126;126;126;126;126;126;138	0	249.13
P10922	ENSMUSG00000096210	14958	P10922	P10922	6	6	6	Histone H1.0;Histone H1.0, N-terminally processed	H1f0	sp|P10922|H10_MOUSE Histone H1.0 OS=Mus musculus OX=10090 GN=H1-0 PE=2 SV=4	1	6	6	6	6	6	6	6	6	5	5	6	6	6	6	6	6	6	5	5	6	6	6	6	6	6	6	5	5	6	6	27.3	27.3	27.3	20.861	194	194	0	23.553
P11031	ENSMUSG00000022205	20024	P11031	P11031	2	2	2	Activated RNA polymerase II transcriptional coactivator p15	Sub1	sp|P11031|TCP4_MOUSE Activated RNA polymerase II transcriptional coactivator p15 OS=Mus musculus OX=10090 GN=Sub1 PE=1 SV=3	1	2	2	2	1	2	1	1	0	0	0	0	1	1	2	1	1	0	0	0	0	1	1	2	1	1	0	0	0	0	1	15.7	15.7	15.7	14.427	127	127	0	7.2644
P11087	ENSMUSG00000001506	12842	P11087;P11087-2	P11087;P11087-2	3;2	3;2	3;2	Collagen alpha-1(I) chain	Col1a1	sp|P11087|CO1A1_MOUSE Collagen alpha-1(I) chain OS=Mus musculus OX=10090 GN=Col1a1 PE=1 SV=4;sp|P11087-2|CO1A1_MOUSE Isoform 2 of Collagen alpha-1(I) chain OS=Mus musculus OX=10090 GN=Col1a1	2	3	3	3	0	1	1	1	0	0	0	3	0	0	1	1	1	0	0	0	3	0	0	1	1	1	0	0	0	3	0	3	3	3	138.03	1453	1453;1225	0	8.3636
P11247	ENSMUSG00000009350	17523	P11247;P49290	P11247	3;1	3;1	3;1	Myeloperoxidase;Myeloperoxidase light chain;Myeloperoxidase heavy chain	Mpo	sp|P11247|PERM_MOUSE Myeloperoxidase OS=Mus musculus OX=10090 GN=Mpo PE=1 SV=2	2	3	3	3	0	3	0	0	0	0	0	0	0	0	3	0	0	0	0	0	0	0	0	3	0	0	0	0	0	0	0	4.9	4.9	4.9	81.181	718	718;716	0	7.5444
P11499	ENSMUSG00000023944	15516	P11499;E9Q3D6;E9Q0C3;E9PX27;D3Z1R1	P11499	27;10;4;3;2	27;10;4;3;2	17;6;4;1;0	Heat shock protein HSP 90-beta	Hsp90ab1	sp|P11499|HS90B_MOUSE Heat shock protein HSP 90-beta OS=Mus musculus OX=10090 GN=Hsp90ab1 PE=1 SV=3	5	27	27	17	20	21	18	19	17	19	16	17	19	20	21	18	19	17	19	16	17	19	13	13	12	12	9	12	11	11	13	40.5	40.5	27.1	83.28	724	724;189;161;112;76	0	276.84
P11983	ENSMUSG00000068039	21454	P11983;P11983-2;F2Z483;A0A3B2WDE2	P11983;P11983-2	20;18;4;2	20;18;4;2	20;18;4;2	T-complex protein 1 subunit alpha	Tcp1	sp|P11983|TCPA_MOUSE T-complex protein 1 subunit alpha OS=Mus musculus OX=10090 GN=Tcp1 PE=1 SV=3;sp|P11983-2|TCPA_MOUSE Isoform 2 of T-complex protein 1 subunit alpha OS=Mus musculus OX=10090 GN=Tcp1	4	20	20	20	11	16	15	13	10	10	10	13	12	11	16	15	13	10	10	10	13	12	11	16	15	13	10	10	10	13	12	39.9	39.9	39.9	60.448	556	556;507;103;54	0	83.623
P12970	ENSMUSG00000062647	27176	P12970;V9GX35	P12970	16;4	16;4	16;4	60S ribosomal protein L7a	Rpl7a	sp|P12970|RL7A_MOUSE 60S ribosomal protein L7a OS=Mus musculus OX=10090 GN=Rpl7a PE=1 SV=2	2	16	16	16	13	15	13	12	14	14	11	13	13	13	15	13	12	14	14	11	13	13	13	15	13	12	14	14	11	13	13	43.2	43.2	43.2	29.976	266	266;225	0	323.31
P13020-2	ENSMUSG00000026879	227753	P13020-2;A6PWS5	P13020-2;A6PWS5	5;3	1;1	1;1	Gelsolin	Gsn	sp|P13020-2|GELS_MOUSE Isoform 2 of Gelsolin OS=Mus musculus OX=10090 GN=Gsn;tr|A6PWS5|A6PWS5_MOUSE Macrophage-capping protein (Fragment) OS=Mus musculus OX=10090 GN=Gsn PE=1 SV=1	2	5	1	1	0	5	0	0	0	0	0	0	0	0	1	0	0	0	0	0	0	0	0	1	0	0	0	0	0	0	0	7.4	1.2	1.2	80.762	731	731;251	0.0032489	2.8769
P13439	ENSMUSG00000022814	22247	P13439	P13439	8	8	8	Uridine 5-monophosphate synthase;Orotate phosphoribosyltransferase;Orotidine 5-phosphate decarboxylase	Umps	sp|P13439|UMPS_MOUSE Uridine 5-monophosphate synthase OS=Mus musculus OX=10090 GN=Umps PE=1 SV=3	1	8	8	8	3	2	3	2	1	2	4	4	4	3	2	3	2	1	2	4	4	4	3	2	3	2	1	2	4	4	4	19.5	19.5	19.5	52.292	481	481	0	21.821
P13541	ENSMUSG00000020908	17883	P13541;A2AQP0	P13541	34;8	2;1	2;1	Myosin-3	Myh3	sp|P13541|MYH3_MOUSE Myosin-3 OS=Mus musculus OX=10090 GN=Myh3 PE=2 SV=2	2	34	2	2	31	0	0	0	0	0	0	23	0	1	0	0	0	0	0	0	1	0	1	0	0	0	0	0	0	1	0	16.4	1	1	223.79	1940	1940;1941	0	5.9478
P13542	ENSMUSG00000055775	17885	P13542;Q8BGE8	P13542	56;1	3;0	2;0	Myosin-8	Myh8	sp|P13542|MYH8_MOUSE Myosin-8 OS=Mus musculus OX=10090 GN=Myh8 PE=2 SV=2	2	56	3	2	53	0	0	0	0	0	0	32	0	2	0	0	0	0	0	0	2	0	2	0	0	0	0	0	0	1	0	30.9	1	0.6	222.7	1937	1937;195	0	8.9011
P13864	ENSMUSG00000004099	13433	P13864;P13864-2	P13864;P13864-2	47;42	47;42	6;1	DNA (cytosine-5)-methyltransferase 1	Dnmt1	sp|P13864|DNMT1_MOUSE DNA (cytosine-5)-methyltransferase 1 OS=Mus musculus OX=10090 GN=Dnmt1 PE=1 SV=5;sp|P13864-2|DNMT1_MOUSE Isoform 2 of DNA (cytosine-5)-methyltransferase 1 OS=Mus musculus OX=10090 GN=Dnmt1	2	47	47	6	28	17	32	38	32	24	25	30	35	28	17	32	38	32	24	25	30	35	3	3	4	4	4	2	3	4	3	37	37	5	183.19	1620	1620;1502	0	323.31
P14069	ENSMUSG00000001025	20200	P14069	P14069	1	1	1	Protein S100-A6	S100a6	sp|P14069|S10A6_MOUSE Protein S100-A6 OS=Mus musculus OX=10090 GN=S100a6 PE=1 SV=3	1	1	1	1	0	1	0	0	0	0	0	0	0	0	1	0	0	0	0	0	0	0	0	1	0	0	0	0	0	0	0	9	9	9	10.051	89	89	0	4.729
P14115	ENSMUSG00000046364	26451	P14115	P14115	5	5	5	60S ribosomal protein L27a	Rpl27a	sp|P14115|RL27A_MOUSE 60S ribosomal protein L27a OS=Mus musculus OX=10090 GN=Rpl27a PE=1 SV=5	1	5	5	5	5	4	4	5	4	4	5	5	5	5	4	4	5	4	4	5	5	5	5	4	4	5	4	4	5	5	5	28.4	28.4	28.4	16.605	148	148	0	56.398
P14131	ENSMUSG00000037563	20055	P14131	P14131	8	8	8	40S ribosomal protein S16	Rps16	sp|P14131|RS16_MOUSE 40S ribosomal protein S16 OS=Mus musculus OX=10090 GN=Rps16 PE=1 SV=4	1	8	8	8	6	5	6	5	5	4	6	7	6	6	5	6	5	5	4	6	7	6	6	5	6	5	5	4	6	7	6	46.6	46.6	46.6	16.445	146	146	0	28.025
P14148	ENSMUSG00000043716	19989	P14148;F6XI62	P14148;F6XI62	24;19	24;19	24;19	60S ribosomal protein L7	Rpl7	sp|P14148|RL7_MOUSE 60S ribosomal protein L7 OS=Mus musculus OX=10090 GN=Rpl7 PE=1 SV=2;tr|F6XI62|F6XI62_MOUSE 60S ribosomal protein L7 (Fragment) OS=Mus musculus OX=10090 GN=Rpl7 PE=1 SV=1	2	24	24	24	20	18	19	19	22	19	21	19	18	20	18	19	19	22	19	21	19	18	20	18	19	19	22	19	21	19	18	57.4	57.4	57.4	31.419	270	270;279	0	323.31
P14206	ENSMUSG00000032518	16785	P14206;A0A1L1SRW0;A0A1L1SUK3	P14206;A0A1L1SRW0	8;4;2	8;4;2	8;4;2	40S ribosomal protein SA	Rpsa	sp|P14206|RSSA_MOUSE 40S ribosomal protein SA OS=Mus musculus OX=10090 GN=Rpsa PE=1 SV=4;tr|A0A1L1SRW0|A0A1L1SRW0_MOUSE 40S ribosomal protein SA (Fragment) OS=Mus musculus OX=10090 GN=Rpsa PE=1 SV=1	3	8	8	8	2	5	3	2	1	1	2	3	3	2	5	3	2	1	1	2	3	3	2	5	3	2	1	1	2	3	3	41.4	41.4	41.4	32.838	295	295;93;133	0	124.87
P14211	ENSMUSG00000003814	12317	P14211	P14211	4	4	4	Calreticulin	Calr	sp|P14211|CALR_MOUSE Calreticulin OS=Mus musculus OX=10090 GN=Calr PE=1 SV=1	1	4	4	4	0	4	0	0	0	0	0	0	0	0	4	0	0	0	0	0	0	0	0	4	0	0	0	0	0	0	0	15.6	15.6	15.6	47.994	416	416	0	18.855
P14685	ENSMUSG00000017221	22123	P14685;F7B7L8	P14685	7;2	7;2	7;2	26S proteasome non-ATPase regulatory subunit 3	Psmd3	sp|P14685|PSMD3_MOUSE 26S proteasome non-ATPase regulatory subunit 3 OS=Mus musculus OX=10090 GN=Psmd3 PE=1 SV=3	2	7	7	7	2	7	2	3	2	2	3	3	4	2	7	2	3	2	2	3	3	4	2	7	2	3	2	2	3	3	4	15.3	15.3	15.3	60.718	530	530;222	0	24.467
P14733	ENSMUSG00000024590	16906	P14733;P21619-2	P14733	16;3	14;1	13;0	Lamin-B1	Lmnb1	sp|P14733|LMNB1_MOUSE Lamin-B1 OS=Mus musculus OX=10090 GN=Lmnb1 PE=1 SV=3	2	16	14	13	6	13	6	6	4	6	6	8	6	6	11	6	6	4	6	6	8	6	6	10	6	6	4	6	6	8	6	27.4	25.9	24.5	66.785	588	588;474	0	49.78
P14869	ENSMUSG00000067274	11837	P14869;S4R1N1;D3YVM5	P14869;S4R1N1;D3YVM5	12;8;7	12;8;7	12;8;7	60S acidic ribosomal protein P0	Rplp0	sp|P14869|RLA0_MOUSE 60S acidic ribosomal protein P0 OS=Mus musculus OX=10090 GN=Rplp0 PE=1 SV=3;tr|S4R1N1|S4R1N1_MOUSE 60S acidic ribosomal protein P0 (Fragment) OS=Mus musculus OX=10090 GN=Rplp0 PE=1 SV=1;tr|D3YVM5|D3YVM5_MOUSE 60S acidic ribosomal prote	3	12	12	12	10	11	11	11	11	8	10	10	11	10	11	11	11	11	8	10	10	11	10	11	11	11	11	8	10	10	11	55.8	55.8	55.8	34.216	317	317;221;145	0	171.44
P14901	ENSMUSG00000005413	15368	P14901	P14901	2	2	2	Heme oxygenase 1	Hmox1	sp|P14901|HMOX1_MOUSE Heme oxygenase 1 OS=Mus musculus OX=10090 GN=Hmox1 PE=1 SV=1	1	2	2	2	0	2	0	0	0	0	0	0	0	0	2	0	0	0	0	0	0	0	0	2	0	0	0	0	0	0	0	10.4	10.4	10.4	32.928	289	289	0	6.5137
P15105	ENSMUSG00000026473	14645	P15105;D3YVK1	P15105;D3YVK1	2;1	2;1	2;1	Glutamine synthetase	Glul	sp|P15105|GLNA_MOUSE Glutamine synthetase OS=Mus musculus OX=10090 GN=Glul PE=1 SV=6;tr|D3YVK1|D3YVK1_MOUSE Glutamine synthetase (Fragment) OS=Mus musculus OX=10090 GN=Glul PE=1 SV=8	2	2	2	2	0	2	0	0	0	0	0	0	0	0	2	0	0	0	0	0	0	0	0	2	0	0	0	0	0	0	0	6.2	6.2	6.2	42.119	373	373;198	0	25.047
P15864	ENSMUSG00000036181	50708	P15864	P15864	6	2	2	Histone H1.2	Hist1h1c	sp|P15864|H12_MOUSE Histone H1.2 OS=Mus musculus OX=10090 GN=H1-2 PE=1 SV=2	1	6	2	2	6	6	6	6	6	6	6	6	6	2	2	2	2	2	2	2	2	2	2	2	2	2	2	2	2	2	2	26.4	10.8	10.8	21.266	212	212	0	66.879
P16045	ENSMUSG00000068220	16852	P16045;A0A2R8VHJ0	P16045	5;1	5;1	5;1	Galectin-1	Lgals1	sp|P16045|LEG1_MOUSE Galectin-1 OS=Mus musculus OX=10090 GN=Lgals1 PE=1 SV=3	2	5	5	5	5	3	3	3	1	3	2	3	4	5	3	3	3	1	3	2	3	4	5	3	3	3	1	3	2	3	4	46.7	46.7	46.7	14.866	135	135;35	0	76.211
Q8C253	ENSMUSG00000050335	16854	Q8C253;P16110	Q8C253;P16110	2;2	2;2	2;2	Galectin;Galectin-3	Lgals3	tr|Q8C253|Q8C253_MOUSE Galectin OS=Mus musculus OX=10090 GN=Lgals3 PE=1 SV=1;sp|P16110|LEG3_MOUSE Galectin-3 OS=Mus musculus OX=10090 GN=Lgals3 PE=1 SV=3	2	2	2	2	0	2	0	0	0	0	0	0	0	0	2	0	0	0	0	0	0	0	0	2	0	0	0	0	0	0	0	9.5	9.5	9.5	27.414	264	264;264	0	8.0721
P16254	ENSMUSG00000009549	20813	P16254;A2AUM6	P16254;A2AUM6	4;3	4;3	4;3	Signal recognition particle 14 kDa protein;Signal recognition particle 14 kDa protein, N-terminally processed	Srp14	sp|P16254|SRP14_MOUSE Signal recognition particle 14 kDa protein OS=Mus musculus OX=10090 GN=Srp14 PE=1 SV=1;tr|A2AUM6|A2AUM6_MOUSE Signal recognition particle 14 kDa protein OS=Mus musculus OX=10090 GN=Srp14 PE=1 SV=1	2	4	4	4	2	3	2	3	2	2	3	3	2	2	3	2	3	2	2	3	3	2	2	3	2	3	2	2	3	3	2	40	40	40	12.51	110	110;97	0	34.462
P16546-2	ENSMUSG00000057738	20740	P16546-2;P16546;A3KGU5;A3KGU7;E9Q447;A3KGU9;P08032	P16546-2;P16546;A3KGU5;A3KGU7;E9Q447;A3KGU9	23;23;22;22;22;22;1	23;23;22;22;22;22;1	23;23;22;22;22;22;1	Spectrin alpha chain, non-erythrocytic 1	Sptan1	sp|P16546-2|SPTN1_MOUSE Isoform 2 of Spectrin alpha chain, non-erythrocytic 1 OS=Mus musculus OX=10090 GN=Sptan1;sp|P16546|SPTN1_MOUSE Spectrin alpha chain, non-erythrocytic 1 OS=Mus musculus OX=10090 GN=Sptan1 PE=1 SV=4;tr|A3KGU5|A3KGU5_MOUSE Spectrin alp	7	23	23	23	0	23	0	0	0	0	0	0	0	0	23	0	0	0	0	0	0	0	0	23	0	0	0	0	0	0	0	11.2	11.2	11.2	282.34	2452	2452;2472;2457;2477;2478;2498;2415	0	63.782
P16627	ENSMUSG00000007033	15482	P16627	P16627	9	2	2	Heat shock 70 kDa protein 1-like	Hspa1l	sp|P16627|HS71L_MOUSE Heat shock 70 kDa protein 1-like OS=Mus musculus OX=10090 GN=Hspa1l PE=1 SV=4	1	9	2	2	4	9	4	3	3	3	3	3	4	0	2	0	0	0	0	0	0	0	0	2	0	0	0	0	0	0	0	19.3	5.9	5.9	70.636	641	641	0	10.767
P17156	ENSMUSG00000059970	15512	P17156	P17156	9	1	1	Heat shock-related 70 kDa protein 2	Hspa2	sp|P17156|HSP72_MOUSE Heat shock-related 70 kDa protein 2 OS=Mus musculus OX=10090 GN=Hspa2 PE=1 SV=2	1	9	1	1	6	9	6	6	7	6	7	7	8	0	1	0	0	0	0	1	1	1	0	1	0	0	0	0	1	1	1	15.5	2.4	2.4	69.641	633	633	0.0091799	2.4373
P17182	ENSMUSG00000059040	433182	P17182;Q6PHC1;B1ARR7;B0QZL1;A0A0N4SUI6;B1ARR6;D3YVD3;D3Z2S4;D3Z6E4;A0A0N4SUX5;P17183;A0A0N4SUW8;Q5SX61	P17182;Q6PHC1;B1ARR7;B0QZL1	10;6;5;5;2;2;2;2;2;2;2;1;1	10;6;5;5;2;2;2;2;2;2;2;1;1	9;6;4;4;1;1;1;1;1;1;1;1;0	Alpha-enolase;Enolase	Eno1	sp|P17182|ENOA_MOUSE Alpha-enolase OS=Mus musculus OX=10090 GN=Eno1 PE=1 SV=3;tr|Q6PHC1|Q6PHC1_MOUSE 2-phospho-D-glycerate hydro-lyase OS=Mus musculus OX=10090 GN=Eno1 PE=1 SV=1;tr|B1ARR7|B1ARR7_MOUSE Alpha-enolase (Fragment) OS=Mus musculus OX=10090 GN=En	13	10	10	9	4	9	3	3	2	1	3	4	2	4	9	3	3	2	1	3	4	2	3	8	2	3	2	1	3	3	2	30.9	30.9	26.7	47.14	434	434;366;119;221;58;67;121;162;315;391;434;37;70	0	87.348
P17426-2	ENSMUSG00000060279	11771	P17426-2;P17426;P17427;A0A140LIG7;A0A140LHA6;A0A0J9YUA7	P17426-2;P17426	14;14;5;2;1;1	14;14;5;2;1;1	14;14;5;2;1;1	AP-2 complex subunit alpha-1	Ap2a1	sp|P17426-2|AP2A1_MOUSE Isoform B of AP-2 complex subunit alpha-1 OS=Mus musculus OX=10090 GN=Ap2a1;sp|P17426|AP2A1_MOUSE AP-2 complex subunit alpha-1 OS=Mus musculus OX=10090 GN=Ap2a1 PE=1 SV=1	6	14	14	14	2	2	1	5	1	6	6	3	6	2	2	1	5	1	6	6	3	6	2	2	1	5	1	6	6	3	6	16.1	16.1	16.1	105.48	955	955;977;938;317;57;131	0	32.196
P17742	ENSMUSG00000071866	268373	P17742;A0A1L1SST0;A0A1L1SRX5;V9GXC1;V9GX31	P17742;A0A1L1SST0	8;6;1;1;1	8;6;1;1;1	8;6;1;1;1	Peptidyl-prolyl cis-trans isomerase A;Peptidyl-prolyl cis-trans isomerase A, N-terminally processed	Ppia	sp|P17742|PPIA_MOUSE Peptidyl-prolyl cis-trans isomerase A OS=Mus musculus OX=10090 GN=Ppia PE=1 SV=2;tr|A0A1L1SST0|A0A1L1SST0_MOUSE Peptidyl-prolyl cis-trans isomerase OS=Mus musculus OX=10090 GN=Ppia PE=1 SV=1	5	8	8	8	6	7	7	5	4	4	6	6	5	6	7	7	5	4	4	6	6	5	6	7	7	5	4	4	6	6	5	64	64	64	17.971	164	164;156;40;77;77	0	75.291
P17751-2	ENSMUSG00000023456	21991	P17751-2;P17751;H7BXC3	P17751-2;P17751;H7BXC3	7;7;5	7;7;5	7;7;5	Triosephosphate isomerase	Tpi1	sp|P17751-2|TPIS_MOUSE Isoform 2 of Triosephosphate isomerase OS=Mus musculus OX=10090 GN=Tpi1;sp|P17751|TPIS_MOUSE Triosephosphate isomerase OS=Mus musculus OX=10090 GN=Tpi1 PE=1 SV=5;tr|H7BXC3|H7BXC3_MOUSE Triosephosphate isomerase OS=Mus musculus OX=100	3	7	7	7	2	7	2	2	1	0	1	3	2	2	7	2	2	1	0	1	3	2	2	7	2	2	1	0	1	3	2	29.1	29.1	29.1	32.191	299	299;249;167	0	30.814
Q61696	ENSMUSG00000091971	193740	Q61696;P17879	Q61696;P17879	14;14	11;11	7;7	Heat shock 70 kDa protein 1A;Heat shock 70 kDa protein 1B	Hspa1a;Hspa1b	sp|Q61696|HS71A_MOUSE Heat shock 70 kDa protein 1A OS=Mus musculus OX=10090 GN=Hspa1a PE=1 SV=2;sp|P17879|HS71B_MOUSE Heat shock 70 kDa protein 1B OS=Mus musculus OX=10090 GN=Hspa1b PE=1 SV=3	2	14	11	7	5	14	6	2	2	3	3	3	5	2	11	3	0	0	1	0	0	2	1	7	2	0	0	1	0	0	1	27.5	20	12.8	70.078	641	641;642	0	235.8
P17918	ENSMUSG00000027342	18538	P17918	P17918	3	3	3	Proliferating cell nuclear antigen	Pcna	sp|P17918|PCNA_MOUSE Proliferating cell nuclear antigen OS=Mus musculus OX=10090 GN=Pcna PE=1 SV=2	1	3	3	3	1	1	2	1	1	2	1	3	1	1	1	2	1	1	2	1	3	1	1	1	2	1	1	2	1	3	1	16.5	16.5	16.5	28.785	261	261	0	19.792
P19096	ENSMUSG00000025153	14104	P19096;A0A0U1RNJ1	P19096;A0A0U1RNJ1	4;3	4;3	4;3	Fatty acid synthase;[Acyl-carrier-protein] S-acetyltransferase;[Acyl-carrier-protein] S-malonyltransferase;3-oxoacyl-[acyl-carrier-protein] synthase;3-oxoacyl-[acyl-carrier-protein] reductase;3-hydroxyacyl-[acyl-carrier-protein] dehydratase;Enoyl-[acyl-carrier-protein] reductase;Oleoyl-[acyl-carrier-protein] hydrolase	Fasn	sp|P19096|FAS_MOUSE Fatty acid synthase OS=Mus musculus OX=10090 GN=Fasn PE=1 SV=2;tr|A0A0U1RNJ1|A0A0U1RNJ1_MOUSE 3-hydroxyacyl-[acyl-carrier-protein] dehydratase OS=Mus musculus OX=10090 GN=Fasn PE=1 SV=1	2	4	4	4	0	3	0	0	0	1	1	0	1	0	3	0	0	0	1	1	0	1	0	3	0	0	0	1	1	0	1	1.8	1.8	1.8	272.43	2504	2504;2502	0	9.6106
P19253	ENSMUSG00000074129	22121	P19253;A0A1B0GSQ6;A0A1B0GS68;A0A1B0GSB2;A0A1B0GTA1;A0A1B0GQW6;A0A1B0GSF0;A0A1B0GSC2;A0A1B0GSL5;A0A1B0GRH1;A0A1B0GT00;A0A1B0GSJ2	P19253;A0A1B0GSQ6;A0A1B0GS68;A0A1B0GSB2;A0A1B0GTA1;A0A1B0GQW6;A0A1B0GSF0	7;6;6;5;5;4;4;3;2;2;2;1	7;6;6;5;5;4;4;3;2;2;2;1	7;6;6;5;5;4;4;3;2;2;2;1	60S ribosomal protein L13a	Rpl13a	sp|P19253|RL13A_MOUSE 60S ribosomal protein L13a OS=Mus musculus OX=10090 GN=Rpl13a PE=1 SV=4;tr|A0A1B0GSQ6|A0A1B0GSQ6_MOUSE 60S ribosomal protein L13a (Fragment) OS=Mus musculus OX=10090 GN=Rpl13a PE=3 SV=1;tr|A0A1B0GS68|A0A1B0GS68_MOUSE 60S ribosomal pro	12	7	7	7	5	6	5	5	5	6	5	5	6	5	6	5	5	5	6	5	5	6	5	6	5	5	5	6	5	5	6	30.5	30.5	30.5	23.464	203	203;167;446;148;177;69;131;122;110;128;133;110	0	199.99
P19324	ENSMUSG00000070436	12406	P19324	P19324	1	1	1	Serpin H1	Serpinh1	sp|P19324|SERPH_MOUSE Serpin H1 OS=Mus musculus OX=10090 GN=Serpinh1 PE=1 SV=3	1	1	1	1	0	0	1	1	0	1	0	1	1	0	0	1	1	0	1	0	1	1	0	0	1	1	0	1	0	1	1	2.6	2.6	2.6	46.533	417	417	0.0020107	3.1538
P20029	ENSMUSG00000026864	14828	P20029	P20029	21	19	19	78 kDa glucose-regulated protein	Hspa5	sp|P20029|BIP_MOUSE Endoplasmic reticulum chaperone BiP OS=Mus musculus OX=10090 GN=Hspa5 PE=1 SV=3	1	21	19	19	6	21	7	3	4	4	5	8	4	4	19	5	1	2	2	3	6	2	4	19	5	1	2	2	3	6	2	39.1	35	35	72.421	655	655	0	130.15
P20108	ENSMUSG00000024997	11757	P20108	P20108	1	1	1	Thioredoxin-dependent peroxide reductase, mitochondrial	Prdx3	sp|P20108|PRDX3_MOUSE Thioredoxin-dependent peroxide reductase, mitochondrial OS=Mus musculus OX=10090 GN=Prdx3 PE=1 SV=1	1	1	1	1	0	1	0	0	0	0	0	0	0	0	1	0	0	0	0	0	0	0	0	1	0	0	0	0	0	0	0	4.3	4.3	4.3	28.127	257	257	0.0069708	2.6584
P20152	ENSMUSG00000026728	22352	P20152;A0A0A6YWC8;A2AKJ2;P31001;G5E846;A0A2R8W6R6;G3X981;P15331-3;P15331;P15331-2;D3YZ35;A0A0R4J036;P46660;P08553	P20152;A0A0A6YWC8	24;23;7;3;2;2;2;2;2;2;1;1;1;1	23;22;6;3;2;2;2;2;2;2;1;1;1;1	21;20;6;1;1;1;1;1;1;1;0;0;0;0	Vimentin	Vim	sp|P20152|VIME_MOUSE Vimentin OS=Mus musculus OX=10090 GN=Vim PE=1 SV=3;tr|A0A0A6YWC8|A0A0A6YWC8_MOUSE Vimentin OS=Mus musculus OX=10090 GN=Vim PE=1 SV=1	14	24	23	21	15	19	16	15	14	16	12	16	17	14	18	15	14	13	15	12	15	16	13	16	13	13	11	13	11	15	15	49.8	48.3	44.6	53.687	466	466;427;134;469;475;506;507;461;475;507;470;848;501;848	0	114.45
P21107-2	ENSMUSG00000027940	59069	P21107-2;D3Z2H9;E9Q7Q3;E9Q5J9;D3Z6I8;P21107;A0A0R4J1P2;E9Q454;B7ZNL3;E9Q448;E9Q450;Q8BSH3;Q8BP43;E9Q452;G5E8R1;E9Q455;E9Q456;G5E8R2;G5E8R0;E9Q453;F8WID5;P58771;P58771-2;S4R2U0;D3YVR0;A2AIM5	P21107-2;D3Z2H9;E9Q7Q3;E9Q5J9;D3Z6I8;P21107;A0A0R4J1P2	9;8;7;7;7;5;5;3;3;3;3;3;3;3;3;3;3;3;3;3;3;3;3;2;2;1	9;8;7;7;7;5;5;3;3;3;3;3;3;3;3;3;3;3;3;3;3;3;3;2;2;1	6;5;4;4;4;2;2;0;0;0;0;0;0;0;0;0;0;0;0;0;0;0;0;0;2;0	Tropomyosin alpha-3 chain	Tpm3;Tpm3-rs7	sp|P21107-2|TPM3_MOUSE Isoform 2 of Tropomyosin alpha-3 chain OS=Mus musculus OX=10090 GN=Tpm3;tr|D3Z2H9|D3Z2H9_MOUSE Tropomyosin 3, related sequence 7 OS=Mus musculus OX=10090 GN=Tpm3-rs7 PE=3 SV=1;tr|E9Q7Q3|E9Q7Q3_MOUSE Tropomyosin alpha-3 chain OS=Mus m	26	9	9	6	2	9	3	1	1	0	1	2	1	2	9	3	1	1	0	1	2	1	1	6	1	0	0	0	1	1	1	34.3	34.3	23.8	29.02	248	248;248;248;285;247;285;284;287;284;284;284;284;284;281;248;251;248;248;245;245;326;284;284;157;71;105	0	52.136
P23116	ENSMUSG00000024991	13669	P23116;A0A494B9I0	P23116	4;1	4;1	4;1	Eukaryotic translation initiation factor 3 subunit A	Eif3a	sp|P23116|EIF3A_MOUSE Eukaryotic translation initiation factor 3 subunit A OS=Mus musculus OX=10090 GN=Eif3a PE=1 SV=5	2	4	4	4	0	4	0	0	0	0	0	0	0	0	4	0	0	0	0	0	0	0	0	4	0	0	0	0	0	0	0	3.3	3.3	3.3	161.93	1344	1344;194	0	11.041
P24270	ENSMUSG00000027187	12359	P24270;A2AL20	P24270	3;1	3;1	3;1	Catalase	Cat	sp|P24270|CATA_MOUSE Catalase OS=Mus musculus OX=10090 GN=Cat PE=1 SV=4	2	3	3	3	2	3	2	2	1	0	1	2	2	2	3	2	2	1	0	1	2	2	2	3	2	2	1	0	1	2	2	7.8	7.8	7.8	59.795	527	527;176	0	9.2747
P24369	ENSMUSG00000032383	19035	P24369	P24369	3	3	3	Peptidyl-prolyl cis-trans isomerase B	Ppib	sp|P24369|PPIB_MOUSE Peptidyl-prolyl cis-trans isomerase B OS=Mus musculus OX=10090 GN=Ppib PE=1 SV=2	1	3	3	3	0	3	0	0	0	0	0	0	0	0	3	0	0	0	0	0	0	0	0	3	0	0	0	0	0	0	0	17.6	17.6	17.6	23.713	216	216	0	13.559
Q99LB4	ENSMUSG00000056737	12332	Q99LB4;P24452	Q99LB4;P24452	1;1	1;1	1;1	Macrophage-capping protein	Capg	tr|Q99LB4|Q99LB4_MOUSE Macrophage-capping protein OS=Mus musculus OX=10090 GN=Capg PE=1 SV=1;sp|P24452|CAPG_MOUSE Macrophage-capping protein OS=Mus musculus OX=10090 GN=Capg PE=1 SV=2	2	1	1	1	0	1	0	0	0	0	0	0	0	0	1	0	0	0	0	0	0	0	0	1	0	0	0	0	0	0	0	3.4	3.4	3.4	38.768	349	349;352	0	5.268
P24547	ENSMUSG00000062867	23918	P24547;A0A0A6YXS4;A0A0A6YY72;E0CXK0;E0CYE2;F7DEU6;P50096	P24547;A0A0A6YXS4	12;6;5;1;1;1;1	12;6;5;1;1;1;1	12;6;5;1;1;1;1	Inosine-5-monophosphate dehydrogenase 2	Impdh2	sp|P24547|IMDH2_MOUSE Inosine-5-monophosphate dehydrogenase 2 OS=Mus musculus OX=10090 GN=Impdh2 PE=1 SV=2;tr|A0A0A6YXS4|A0A0A6YXS4_MOUSE Inosine-5-monophosphate dehydrogenase 2 (Fragment) OS=Mus musculus OX=10090 GN=Impdh2 PE=1 SV=1	7	12	12	12	5	6	5	4	1	5	4	6	11	5	6	5	4	1	5	4	6	11	5	6	5	4	1	5	4	6	11	30	30	30	55.814	514	514;248;320;231;489;538;514	0	56.43
P25206	ENSMUSG00000041859	17215	P25206	P25206	33	33	33	DNA replication licensing factor MCM3	Mcm3	sp|P25206|MCM3_MOUSE DNA replication licensing factor MCM3 OS=Mus musculus OX=10090 GN=Mcm3 PE=1 SV=2	1	33	33	33	26	22	26	28	25	21	25	24	27	26	22	26	28	25	21	25	24	27	26	22	26	28	25	21	25	24	27	48.2	48.2	48.2	91.545	812	812	0	226.38
P25444	ENSMUSG00000044533	16898	P25444;D3YVC1;D3YWJ3	P25444;D3YVC1;D3YWJ3	15;14;14	15;14;14	15;14;14	40S ribosomal protein S2	Rps2	sp|P25444|RS2_MOUSE 40S ribosomal protein S2 OS=Mus musculus OX=10090 GN=Rps2 PE=1 SV=3;tr|D3YVC1|D3YVC1_MOUSE 40S ribosomal protein S2 (Fragment) OS=Mus musculus OX=10090 GN=Rps2 PE=1 SV=1;tr|D3YWJ3|D3YWJ3_MOUSE 40S ribosomal protein S2 OS=Mus musculus OX	3	15	15	15	14	15	15	15	15	14	15	15	15	14	15	15	15	15	14	15	15	15	14	15	15	15	15	14	15	15	15	52.6	52.6	52.6	31.231	293	293;269;302	0	124.77
P26040	ENSMUSG00000052397	22350	P26040	P26040	7	4	4	Ezrin	Ezr	sp|P26040|EZRI_MOUSE Ezrin OS=Mus musculus OX=10090 GN=Ezr PE=1 SV=3	1	7	4	4	0	7	0	0	0	0	0	0	0	0	4	0	0	0	0	0	0	0	0	4	0	0	0	0	0	0	0	10.6	6.1	6.1	69.406	586	586	0	12.827
P26041	ENSMUSG00000031207	17698	P26041	P26041	11	11	7	Moesin	Msn	sp|P26041|MOES_MOUSE Moesin OS=Mus musculus OX=10090 GN=Msn PE=1 SV=3	1	11	11	7	0	11	0	0	0	0	0	0	0	0	11	0	0	0	0	0	0	0	0	7	0	0	0	0	0	0	0	18.9	18.9	13	67.766	577	577	0	28.306
P26231	ENSMUSG00000037815	12385	P26231;A0A494BAD0;A0A494BBB4	P26231	8;2;1	8;2;1	7;2;1	Catenin alpha-1	Ctnna1	sp|P26231|CTNA1_MOUSE Catenin alpha-1 OS=Mus musculus OX=10090 GN=Ctnna1 PE=1 SV=1	3	8	8	7	0	8	0	0	0	0	0	0	0	0	8	0	0	0	0	0	0	0	0	7	0	0	0	0	0	0	0	11.1	11.1	9.3	100.11	906	906;415;122	0	26.556
Q80XR5	ENSMUSG00000030435	22185	Q80XR5;P26369;Q3KQM4;A0A140LJK3	Q80XR5;P26369;Q3KQM4	10;10;9;1	10;10;9;1	10;10;9;1	Splicing factor U2AF 65 kDa subunit	U2af2	tr|Q80XR5|Q80XR5_MOUSE U2 snRNP auxiliary factor large subunit OS=Mus musculus OX=10090 GN=U2af2 PE=1 SV=1;sp|P26369|U2AF2_MOUSE Splicing factor U2AF 65 kDa subunit OS=Mus musculus OX=10090 GN=U2af2 PE=1 SV=3;tr|Q3KQM4|Q3KQM4_MOUSE U2 snRNP auxiliary facto	4	10	10	10	7	7	7	7	7	9	9	8	8	7	7	7	7	7	9	9	8	8	7	7	7	7	7	9	9	8	8	23.6	23.6	23.6	53.12	471	471;475;307;95	0	42.433
P26516	ENSMUSG00000039067	17463	P26516	P26516	3	3	3	26S proteasome non-ATPase regulatory subunit 7	Psmd7	sp|P26516|PSMD7_MOUSE 26S proteasome non-ATPase regulatory subunit 7 OS=Mus musculus OX=10090 GN=Psmd7 PE=1 SV=2	1	3	3	3	0	2	0	0	0	1	0	0	0	0	2	0	0	0	1	0	0	0	0	2	0	0	0	1	0	0	0	9	9	9	36.539	321	321	0	6.9922
Q8C483	ENSMUSG00000068739	20226	Q8C483;P26638;A2AFS0;A2AFS1	Q8C483;P26638;A2AFS0;A2AFS1	4;4;3;2	4;4;3;2	4;4;3;2	Serine--tRNA ligase, cytoplasmic	Sars	tr|Q8C483|Q8C483_MOUSE Seryl-tRNA synthetase OS=Mus musculus OX=10090 GN=Sars PE=1 SV=1;sp|P26638|SYSC_MOUSE Serine--tRNA ligase, cytoplasmic OS=Mus musculus OX=10090 GN=Sars1 PE=1 SV=3;tr|A2AFS0|A2AFS0_MOUSE Seryl-tRNA synthetase (Fragment) OS=Mus musculu	4	4	4	4	0	3	0	0	0	0	0	0	1	0	3	0	0	0	0	0	0	1	0	3	0	0	0	0	0	0	1	9.3	9.3	9.3	61.166	536	536;512;352;186	0	10.727
P26883	ENSMUSG00000032966	14225	P26883	P26883	1	1	1	Peptidyl-prolyl cis-trans isomerase FKBP1A	Fkbp1a	sp|P26883|FKB1A_MOUSE Peptidyl-prolyl cis-trans isomerase FKBP1A OS=Mus musculus OX=10090 GN=Fkbp1a PE=1 SV=2	1	1	1	1	0	1	0	0	0	0	0	0	0	0	1	0	0	0	0	0	0	0	0	1	0	0	0	0	0	0	0	12	12	12	11.922	108	108	0	5.2362
P63163	ENSMUSG00000102252	20646	P63163;P27048;A0A0G2JGN4	P63163;P27048;A0A0G2JGN4	5;5;3	5;5;3	5;5;3	Small nuclear ribonucleoprotein-associated protein N;Small nuclear ribonucleoprotein-associated protein B	Snrpn;Snrpb	sp|P63163|RSMN_MOUSE Small nuclear ribonucleoprotein-associated protein N OS=Mus musculus OX=10090 GN=Snrpn PE=1 SV=1;sp|P27048|RSMB_MOUSE Small nuclear ribonucleoprotein-associated protein B OS=Mus musculus OX=10090 GN=Snrpb PE=1 SV=1;tr|A0A0G2JGN4|A0A0G2	3	5	5	5	4	1	2	3	2	0	2	2	4	4	1	2	3	2	0	2	2	4	4	1	2	3	2	0	2	2	4	18.3	18.3	18.3	24.614	240	240;231;70	0	12.045
P27546-3	ENSMUSG00000032479	17758	P27546-3;P27546-2;P27546;A0A0G2JG35;A0A140T8T5;E9PZ43;A0A0G2JFK3;A0A0G2JDY5;A0A0G2JFT4;A0A0G2JDN7;A0A0G2JFH2;P27546-4	P27546-3;P27546-2;P27546;A0A0G2JG35;A0A140T8T5;E9PZ43	3;3;3;2;2;2;1;1;1;1;1;1	3;3;3;2;2;2;1;1;1;1;1;1	3;3;3;2;2;2;1;1;1;1;1;1	Microtubule-associated protein 4;Microtubule-associated protein	Map4	sp|P27546-3|MAP4_MOUSE Isoform 3 of Microtubule-associated protein 4 OS=Mus musculus OX=10090 GN=Map4;sp|P27546-2|MAP4_MOUSE Isoform 2 of Microtubule-associated protein 4 OS=Mus musculus OX=10090 GN=Map4;sp|P27546|MAP4_MOUSE Microtubule-associated protein	12	3	3	3	0	0	0	0	1	1	0	1	2	0	0	0	0	1	1	0	1	2	0	0	0	0	1	1	0	1	2	4.2	4.2	4.2	113.65	1086	1086;1124;1125;290;414;933;207;220;276;902;1441;902	0.0007278	4.2688
P27612	ENSMUSG00000028577	18786	P27612;F7D1R5	P27612;F7D1R5	2;1	2;1	2;1	Phospholipase A-2-activating protein	Plaa	sp|P27612|PLAP_MOUSE Phospholipase A-2-activating protein OS=Mus musculus OX=10090 GN=Plaa PE=1 SV=4;tr|F7D1R5|F7D1R5_MOUSE Phospholipase A-2-activating protein (Fragment) OS=Mus musculus OX=10090 GN=Plaa PE=1 SV=1	2	2	2	2	0	2	0	0	0	0	0	0	2	0	2	0	0	0	0	0	0	2	0	2	0	0	0	0	0	0	2	4	4	4	87.22	794	794;214	0	6.9103
P27641	ENSMUSG00000026187	22596	P27641	P27641	16	16	16	X-ray repair cross-complementing protein 5	Xrcc5	sp|P27641|XRCC5_MOUSE X-ray repair cross-complementing protein 5 OS=Mus musculus OX=10090 GN=Xrcc5 PE=1 SV=4	1	16	16	16	12	13	12	10	9	9	7	8	9	12	13	12	10	9	9	7	8	9	12	13	12	10	9	9	7	8	9	25.5	25.5	25.5	83.056	732	732	0	125.26
P27659	ENSMUSG00000060036	27367	P27659;A0A087WQK0;A0A2R8VHN4;A0A087WNS0;Q9CQ09;E9PWZ3	P27659	23;8;7;7;2;2	23;8;7;7;2;2	23;8;7;7;2;2	60S ribosomal protein L3	Rpl3	sp|P27659|RL3_MOUSE 60S ribosomal protein L3 OS=Mus musculus OX=10090 GN=Rpl3 PE=1 SV=3	6	23	23	23	18	20	17	17	18	20	19	18	19	18	20	17	17	18	20	19	18	19	18	20	17	17	18	20	19	18	19	54.6	54.6	54.6	46.109	403	403;188;134;180;240;407	0	323.31
P27661	ENSMUSG00000049932	15270	P27661	P27661	3	1	0	Histone H2AX	H2afx	sp|P27661|H2AX_MOUSE Histone H2AX OS=Mus musculus OX=10090 GN=H2ax PE=1 SV=2	1	3	1	0	3	3	3	3	3	3	3	3	3	1	1	1	1	1	1	1	1	1	0	0	0	0	0	0	0	0	0	27.3	16.1	0	15.142	143	143	0	161.15
P27773	ENSMUSG00000027248	14827	P27773;F6Q404	P27773;F6Q404	5;4	5;4	5;4	Protein disulfide-isomerase A3	Pdia3	sp|P27773|PDIA3_MOUSE Protein disulfide-isomerase A3 OS=Mus musculus OX=10090 GN=Pdia3 PE=1 SV=2;tr|F6Q404|F6Q404_MOUSE Protein disulfide-isomerase A3 (Fragment) OS=Mus musculus OX=10090 GN=Pdia3 PE=1 SV=1	2	5	5	5	0	5	0	0	0	0	0	0	0	0	5	0	0	0	0	0	0	0	0	5	0	0	0	0	0	0	0	10.7	10.7	10.7	56.678	505	505;124	0	18.36
P28481-2	ENSMUSG00000022483	12824	P28481-2;P28481-7;P28481-6;P28481-5;P28481-4;P28481-1;P28481	P28481-2;P28481-7;P28481-6;P28481-5;P28481-4;P28481-1;P28481	1;1;1;1;1;1;1	1;1;1;1;1;1;1	1;1;1;1;1;1;1	Collagen alpha-1(II) chain;Collagen alpha-1(II) chain;Chondrocalcin	Col2a1	sp|P28481-2|CO2A1_MOUSE Isoform 3 of Collagen alpha-1(II) chain OS=Mus musculus OX=10090 GN=Col2a1;sp|P28481-7|CO2A1_MOUSE Isoform 7 of Collagen alpha-1(II) chain OS=Mus musculus OX=10090 GN=Col2a1;sp|P28481-6|CO2A1_MOUSE Isoform 6 of Collagen alpha-1(II)	7	1	1	1	0	0	0	0	0	0	0	1	0	0	0	0	0	0	0	0	1	0	0	0	0	0	0	0	0	1	0	0.6	0.6	0.6	131.86	1390	1390;1419;1441;1441;1458;1458;1487	0.001386	3.5635
P28653	ENSMUSG00000031375	12111	P28653	P28653	2	2	2	Biglycan	Bgn	sp|P28653|PGS1_MOUSE Biglycan OS=Mus musculus OX=10090 GN=Bgn PE=1 SV=1	1	2	2	2	1	0	1	0	0	0	0	0	0	1	0	1	0	0	0	0	0	0	1	0	1	0	0	0	0	0	0	5.7	5.7	5.7	41.639	369	369	0.0013986	3.6434
Q3TF41	ENSMUSG00000058799	53605	Q3TF41;Q8BSH9;P28656;A0A140LJB5;B7ZNL2;Q78ZA7	Q3TF41;Q8BSH9;P28656;A0A140LJB5;B7ZNL2;Q78ZA7	2;2;2;1;1;1	2;2;2;1;1;1	2;2;2;1;1;1	Nucleosome assembly protein 1-like 1;Nucleosome assembly protein 1-like 4	Nap1l1;Nap1l4	tr|Q3TF41|Q3TF41_MOUSE Nucleosome assembly protein 1-like 1 OS=Mus musculus OX=10090 GN=Nap1l1 PE=1 SV=1;tr|Q8BSH9|Q8BSH9_MOUSE Nucleosome assembly protein 1-like 1 OS=Mus musculus OX=10090 GN=Nap1l1 PE=1 SV=1;sp|P28656|NP1L1_MOUSE Nucleosome assembly prot	6	2	2	2	1	1	1	1	1	1	1	1	1	1	1	1	1	1	1	1	1	1	1	1	1	1	1	1	1	1	1	5.7	5.7	5.7	42.732	368	368;383;391;219;386;375	0	5.0443
P28738	ENSMUSG00000026764	16574	P28738;Q61768;P33175;E9QAK5	P28738;Q61768;P33175;E9QAK5	2;2;2;1	2;2;2;1	2;2;2;1	Kinesin heavy chain isoform 5C;Kinesin-1 heavy chain;Kinesin heavy chain isoform 5A;Kinesin-like protein	Kif5c;Kif5b;Kif5a	sp|P28738|KIF5C_MOUSE Kinesin heavy chain isoform 5C OS=Mus musculus OX=10090 GN=Kif5c PE=1 SV=3;sp|Q61768|KINH_MOUSE Kinesin-1 heavy chain OS=Mus musculus OX=10090 GN=Kif5b PE=1 SV=3;sp|P33175|KIF5A_MOUSE Kinesin heavy chain isoform 5A OS=Mus musculus OX=	4	2	2	2	0	2	0	0	0	0	0	0	0	0	2	0	0	0	0	0	0	0	0	2	0	0	0	0	0	0	0	2.6	2.6	2.6	109.27	956	956;963;1027;619	0.006962	2.6512
P29341	ENSMUSG00000022283	18458	P29341;Q9D4E6;F6ZAX1;A0A2I3BR37;A2A5N3;Q8C7D3	P29341	31;11;5;4;4;1	31;11;5;4;4;1	19;4;4;2;1;1	Polyadenylate-binding protein 1	Pabpc1	sp|P29341|PABP1_MOUSE Polyadenylate-binding protein 1 OS=Mus musculus OX=10090 GN=Pabpc1 PE=1 SV=2	6	31	31	19	29	27	28	26	25	26	22	26	24	29	27	28	26	25	26	22	26	24	17	16	17	16	17	16	13	16	14	59.6	59.6	37.4	70.67	636	636;643;118;126;607;381	0	323.31
P30416	ENSMUSG00000030357	14228	P30416;F6S2D5;F7CAT1	P30416	10;4;3	10;4;3	10;4;3	Peptidyl-prolyl cis-trans isomerase FKBP4;Peptidyl-prolyl cis-trans isomerase FKBP4, N-terminally processed	Fkbp4	sp|P30416|FKBP4_MOUSE Peptidyl-prolyl cis-trans isomerase FKBP4 OS=Mus musculus OX=10090 GN=Fkbp4 PE=1 SV=5	3	10	10	10	4	4	4	3	0	1	3	4	6	4	4	4	3	0	1	3	4	6	4	4	4	3	0	1	3	4	6	27.1	27.1	27.1	51.572	458	458;260;187	0	25.557
P30681	ENSMUSG00000054717	97165	P30681;A0A1B0GQX9	P30681	3;1	3;1	3;1	High mobility group protein B2	Hmgb2	sp|P30681|HMGB2_MOUSE High mobility group protein B2 OS=Mus musculus OX=10090 GN=Hmgb2 PE=1 SV=3	2	3	3	3	2	2	0	3	2	0	2	1	1	2	2	0	3	2	0	2	1	1	2	2	0	3	2	0	2	1	1	17.6	17.6	17.6	24.162	210	210;99	0	15.059
Q3UZG4	ENSMUSG00000028029	13722	Q3UZG4;P31230;A0A0G2JEU9;A0A0G2JDW6;A0A0G2JDH0	Q3UZG4;P31230	6;6;2;2;1	6;6;2;2;1	6;6;2;2;1	Aminoacyl tRNA synthase complex-interacting multifunctional protein 1;Endothelial monocyte-activating polypeptide 2	Aimp1	tr|Q3UZG4|Q3UZG4_MOUSE Aminoacyl tRNA synthase complex-interacting multifunctional protein 1 OS=Mus musculus OX=10090 GN=Aimp1 PE=1 SV=1;sp|P31230|AIMP1_MOUSE Aminoacyl tRNA synthase complex-interacting multifunctional protein 1 OS=Mus musculus OX=10090 GN	5	6	6	6	4	2	2	3	4	3	3	3	4	4	2	2	3	4	3	3	3	4	4	2	2	3	4	3	3	3	4	32.9	32.9	32.9	35.166	319	319;310;80;115;55	0	36.111
P31254	ENSMUSG00000069053	22202	P31254	P31254	14	10	10	Ubiquitin-like modifier-activating enzyme 1 Y	Uba1y	sp|P31254|UBA1Y_MOUSE Ubiquitin-like modifier-activating enzyme 1 Y OS=Mus musculus OX=10090 GN=Uba1y PE=1 SV=2	1	14	10	10	7	3	5	6	2	3	6	6	6	6	1	4	4	1	1	4	4	4	6	1	4	4	1	1	4	4	4	17.9	13.8	13.8	118.04	1058	1058	0	24.081
P31938	ENSMUSG00000004936	26395	P31938	P31938	1	1	1	Dual specificity mitogen-activated protein kinase kinase 1	Map2k1	sp|P31938|MP2K1_MOUSE Dual specificity mitogen-activated protein kinase kinase 1 OS=Mus musculus OX=10090 GN=Map2k1 PE=1 SV=2	1	1	1	1	1	0	0	0	0	1	0	0	0	1	0	0	0	0	1	0	0	0	1	0	0	0	0	1	0	0	0	3.6	3.6	3.6	43.474	393	393	0.005102	2.7136
P32067	ENSMUSG00000068882	20823	P32067;A2AR07;D6RI87;F6SXM5	P32067;A2AR07;D6RI87	24;15;12;7	24;15;12;7	24;15;12;7	Lupus La protein homolog	Ssb	sp|P32067|LA_MOUSE Lupus La protein homolog OS=Mus musculus OX=10090 GN=Ssb PE=1 SV=1;tr|A2AR07|A2AR07_MOUSE Lupus La protein homolog (Fragment) OS=Mus musculus OX=10090 GN=Ssb PE=1 SV=1;tr|D6RI87|D6RI87_MOUSE Lupus La protein homolog OS=Mus musculus OX=10	4	24	24	24	18	17	17	21	21	19	19	19	20	18	17	17	21	21	19	19	19	20	18	17	17	21	21	19	19	19	20	47.7	47.7	47.7	47.756	415	415;184;159;230	0	321.69
P32233	ENSMUSG00000020457	13494	P32233	P32233	3	3	3	Developmentally-regulated GTP-binding protein 1	Drg1	sp|P32233|DRG1_MOUSE Developmentally-regulated GTP-binding protein 1 OS=Mus musculus OX=10090 GN=Drg1 PE=1 SV=1	1	3	3	3	0	0	0	1	1	1	2	2	1	0	0	0	1	1	1	2	2	1	0	0	0	1	1	1	2	2	1	11.7	11.7	11.7	40.512	367	367	0	7.4996
P33174	ENSMUSG00000034311	16571	P33174	P33174	3	3	3	Chromosome-associated kinesin KIF4	Kif4	sp|P33174|KIF4_MOUSE Chromosome-associated kinesin KIF4 OS=Mus musculus OX=10090 GN=Kif4 PE=1 SV=3	1	3	3	3	2	0	1	2	2	1	1	2	1	2	0	1	2	2	1	1	2	1	2	0	1	2	2	1	1	2	1	2.8	2.8	2.8	139.52	1231	1231	0	6.841
P34022	ENSMUSG00000005732	19385	P34022;H7BX22	P34022;H7BX22	4;3	4;3	4;3	Ran-specific GTPase-activating protein	Ranbp1	sp|P34022|RANG_MOUSE Ran-specific GTPase-activating protein OS=Mus musculus OX=10090 GN=Ranbp1 PE=1 SV=2;tr|H7BX22|H7BX22_MOUSE Ran-specific GTPase-activating protein OS=Mus musculus OX=10090 GN=Ranbp1 PE=1 SV=1	2	4	4	4	3	2	2	2	2	4	3	3	2	3	2	2	2	2	4	3	3	2	3	2	2	2	2	4	3	3	2	18.7	18.7	18.7	23.596	203	203;153	0	10.384
P34884	ENSMUSG00000033307	17319	P34884	P34884	3	3	3	Macrophage migration inhibitory factor	Mif	sp|P34884|MIF_MOUSE Macrophage migration inhibitory factor OS=Mus musculus OX=10090 GN=Mif PE=1 SV=2	1	3	3	3	2	1	0	1	0	0	1	1	2	2	1	0	1	0	0	1	1	2	2	1	0	1	0	0	1	1	2	23.5	23.5	23.5	12.504	115	115	0	6.5507
P35492	ENSMUSG00000020017	15109	P35492;F8WH73	P35492	8;1	8;1	8;1	Histidine ammonia-lyase	Hal	sp|P35492|HUTH_MOUSE Histidine ammonia-lyase OS=Mus musculus OX=10090 GN=Hal PE=1 SV=1	2	8	8	8	2	7	3	2	1	1	1	2	3	2	7	3	2	1	1	1	2	3	2	7	3	2	1	1	1	2	3	12.9	12.9	12.9	72.257	657	657;167	0	36.075
P35550	ENSMUSG00000046865	14113	P35550;A0A140LIR6	P35550	15;4	15;4	12;4	rRNA 2-O-methyltransferase fibrillarin	Fbl	sp|P35550|FBRL_MOUSE rRNA 2-O-methyltransferase fibrillarin OS=Mus musculus OX=10090 GN=Fbl PE=1 SV=2	2	15	15	12	12	11	13	13	14	15	12	14	15	12	11	13	13	14	15	12	14	15	9	8	10	11	11	12	10	11	12	55.7	55.7	48	34.306	327	327;85	0	234.34
P35564	ENSMUSG00000020368	12330	P35564	P35564	4	4	4	Calnexin	Canx	sp|P35564|CALX_MOUSE Calnexin OS=Mus musculus OX=10090 GN=Canx PE=1 SV=1	1	4	4	4	0	4	1	1	0	0	0	0	1	0	4	1	1	0	0	0	0	1	0	4	1	1	0	0	0	0	1	7.3	7.3	7.3	67.277	591	591	0	10.107
P35700	ENSMUSG00000028691	18477	P35700;B1AXW5;B1AXW6;B1AXW4	P35700;B1AXW5;B1AXW6;B1AXW4	12;10;10;7	12;10;10;7	10;9;9;7	Peroxiredoxin-1	Prdx1	sp|P35700|PRDX1_MOUSE Peroxiredoxin-1 OS=Mus musculus OX=10090 GN=Prdx1 PE=1 SV=1;tr|B1AXW5|B1AXW5_MOUSE Peroxiredoxin-1 (Fragment) OS=Mus musculus OX=10090 GN=Prdx1 PE=1 SV=8;tr|B1AXW6|B1AXW6_MOUSE Peroxiredoxin-1 (Fragment) OS=Mus musculus OX=10090 GN=Pr	4	12	12	10	11	11	10	10	11	9	9	9	11	11	11	10	10	11	9	9	9	11	9	9	8	8	9	7	7	7	9	63.8	63.8	59.8	22.176	199	199;169;176;123	0	99.415
P35979	ENSMUSG00000038900	269261	P35979	P35979	6	6	6	60S ribosomal protein L12	Rpl12	sp|P35979|RL12_MOUSE 60S ribosomal protein L12 OS=Mus musculus OX=10090 GN=Rpl12 PE=1 SV=2	1	6	6	6	5	6	6	6	6	6	5	5	6	5	6	6	6	6	6	5	5	6	5	6	6	6	6	6	5	5	6	54.5	54.5	54.5	17.804	165	165	0	323.31
P35980	ENSMUSG00000059070	19899	P35980;A0A1B0GSS8;A0A1B0GQU8;A0A1B0GSA8;A0A1B0GSF7;A0A1B0GRZ3;A0A1B0GS28	P35980;A0A1B0GSS8;A0A1B0GQU8;A0A1B0GSA8;A0A1B0GSF7	8;7;7;5;5;2;2	8;7;7;5;5;2;2	8;7;7;5;5;2;2	60S ribosomal protein L18	Rpl18	sp|P35980|RL18_MOUSE 60S ribosomal protein L18 OS=Mus musculus OX=10090 GN=Rpl18 PE=1 SV=3;tr|A0A1B0GSS8|A0A1B0GSS8_MOUSE 60S ribosomal protein L18 OS=Mus musculus OX=10090 GN=Rpl18 PE=1 SV=1;tr|A0A1B0GQU8|A0A1B0GQU8_MOUSE 60S ribosomal protein L18 OS=Mus	7	8	8	8	8	7	8	8	8	7	7	8	8	8	7	8	8	8	7	7	8	8	8	7	8	8	8	7	7	8	8	41.5	41.5	41.5	21.644	188	188;155;159;126;136;57;80	0	93.906
P36916	ENSMUSG00000024429	14670	P36916;P36916-2	P36916;P36916-2	2;1	2;1	2;1	Guanine nucleotide-binding protein-like 1	Gnl1	sp|P36916|GNL1_MOUSE Guanine nucleotide-binding protein-like 1 OS=Mus musculus OX=10090 GN=Gnl1 PE=1 SV=4;sp|P36916-2|GNL1_MOUSE Isoform 2 of Guanine nucleotide-binding protein-like 1 OS=Mus musculus OX=10090 GN=Gnl1	2	2	2	2	1	1	2	2	1	0	2	1	1	1	1	2	2	1	0	2	1	1	1	1	2	2	1	0	2	1	1	4.9	4.9	4.9	68.77	607	607;430	0	4.9165
P37913	ENSMUSG00000056394	16881	P37913;Q8R055;E9PV36	P37913;Q8R055	17;17;7	17;17;7	17;17;7	DNA ligase 1;DNA ligase	Lig1	sp|P37913|DNLI1_MOUSE DNA ligase 1 OS=Mus musculus OX=10090 GN=Lig1 PE=1 SV=2;tr|Q8R055|Q8R055_MOUSE DNA ligase OS=Mus musculus OX=10090 GN=Lig1 PE=1 SV=1	3	17	17	17	11	5	7	8	6	9	4	11	8	11	5	7	8	6	9	4	11	8	11	5	7	8	6	9	4	11	8	23.6	23.6	23.6	102.29	916	916;916;270	0	129.47
P38647	ENSMUSG00000024359	15526	P38647	P38647	8	8	8	Stress-70 protein, mitochondrial	Hspa9	sp|P38647|GRP75_MOUSE Stress-70 protein, mitochondrial OS=Mus musculus OX=10090 GN=Hspa9 PE=1 SV=3	1	8	8	8	0	8	2	0	1	0	0	1	1	0	8	2	0	1	0	0	1	1	0	8	2	0	1	0	0	1	1	16.6	16.6	16.6	73.46	679	679	0	26.9
P40124	ENSMUSG00000028656	12331	P40124;B1ARS0	P40124	6;2	6;2	6;2	Adenylyl cyclase-associated protein 1	Cap1	sp|P40124|CAP1_MOUSE Adenylyl cyclase-associated protein 1 OS=Mus musculus OX=10090 GN=Cap1 PE=1 SV=4	2	6	6	6	0	6	0	0	0	0	0	0	0	0	6	0	0	0	0	0	0	0	0	6	0	0	0	0	0	0	0	14.3	14.3	14.3	51.564	474	474;164	0	14.068
P40142	ENSMUSG00000021957	21881	P40142;A0A286YE28	P40142;A0A286YE28	5;4	5;4	5;4	Transketolase	Tkt	sp|P40142|TKT_MOUSE Transketolase OS=Mus musculus OX=10090 GN=Tkt PE=1 SV=1;tr|A0A286YE28|A0A286YE28_MOUSE Transketolase (Fragment) OS=Mus musculus OX=10090 GN=Tkt PE=1 SV=1	2	5	5	5	0	5	0	0	0	0	0	0	0	0	5	0	0	0	0	0	0	0	0	5	0	0	0	0	0	0	0	9	9	9	67.63	623	623;502	0	14.866
P40336	ENSMUSG00000020078	30930	P40336;P40336-2	P40336;P40336-2	1;1	1;1	1;1	Vacuolar protein sorting-associated protein 26A	Vps26a	sp|P40336|VP26A_MOUSE Vacuolar protein sorting-associated protein 26A OS=Mus musculus OX=10090 GN=Vps26a PE=1 SV=1;sp|P40336-2|VP26A_MOUSE Isoform 2 of Vacuolar protein sorting-associated protein 26A OS=Mus musculus OX=10090 GN=Vps26a	2	1	1	1	0	1	0	0	0	0	0	0	0	0	1	0	0	0	0	0	0	0	0	1	0	0	0	0	0	0	0	5.5	5.5	5.5	38.113	327	327;359	0.0019894	3.0649
P41105	ENSMUSG00000030432	19943	P41105;F6Z0X0	P41105	9;2	9;2	9;2	60S ribosomal protein L28	Rpl28	sp|P41105|RL28_MOUSE 60S ribosomal protein L28 OS=Mus musculus OX=10090 GN=Rpl28 PE=1 SV=2	2	9	9	9	7	7	6	8	9	6	8	7	7	7	7	6	8	9	6	8	7	7	7	7	6	8	9	6	8	7	7	51.1	51.1	51.1	15.733	137	137;85	0	50.959
Q62240-2	ENSMUSG00000056673	20592	Q62240-2;P41230-3;Q62240;P41230-2;P41230;F7BXT3;Q3UXZ9	Q62240-2;P41230-3;Q62240;P41230-2;P41230;F7BXT3;Q3UXZ9	2;2;2;2;2;1;1	1;1;1;1;1;1;1	1;1;1;1;1;1;1	Lysine-specific demethylase 5D;Lysine-specific demethylase 5C;Lysine-specific demethylase 5A	Kdm5d;Kdm5c;Kdm5a	sp|Q62240-2|KDM5D_MOUSE Isoform 2 of Lysine-specific demethylase 5D OS=Mus musculus OX=10090 GN=Kdm5d;sp|P41230-3|KDM5C_MOUSE Isoform 3 of Lysine-specific demethylase 5C OS=Mus musculus OX=10090 GN=Kdm5c;sp|Q62240|KDM5D_MOUSE Lysine-specific demethylase 5D	7	2	1	1	1	1	0	0	1	0	0	0	1	1	0	0	0	1	0	0	0	1	1	0	0	0	1	0	0	0	1	2.3	1.1	1.1	131.4	1150	1150;1510;1548;1551;1554;257;1690	0	8.9302
P42227-2	ENSMUSG00000004040	20848	P42227-2;P42227-3;P42227;B7ZC18	P42227-2;P42227-3;P42227;B7ZC18	9;9;9;8	9;9;9;8	9;9;9;8	Signal transducer and activator of transcription 3;Signal transducer and activator of transcription	Stat3	sp|P42227-2|STAT3_MOUSE Isoform Stat3B of Signal transducer and activator of transcription 3 OS=Mus musculus OX=10090 GN=Stat3;sp|P42227-3|STAT3_MOUSE Isoform Del-701 of Signal transducer and activator of transcription 3 OS=Mus musculus OX=10090 GN=Stat3;s	4	9	9	9	1	9	1	2	1	1	2	3	4	1	9	1	2	1	1	2	3	4	1	9	1	2	1	1	2	3	4	17.5	17.5	17.5	83.125	722	722;769;770;744	0	47.44
P42669	ENSMUSG00000043991	19290	P42669	P42669	5	5	5	Transcriptional activator protein Pur-alpha	Pura	sp|P42669|PURA_MOUSE Transcriptional activator protein Pur-alpha OS=Mus musculus OX=10090 GN=Pura PE=1 SV=1	1	5	5	5	1	4	3	2	3	2	3	4	4	1	4	3	2	3	2	3	4	4	1	4	3	2	3	2	3	4	4	29.6	29.6	29.6	34.883	321	321	0	94.102
P42932	ENSMUSG00000025613	12469	P42932;H3BL49;H3BJB6;H3BLL1;H3BKG2;H3BKR8	P42932;H3BL49	17;15;8;4;4;1	17;15;8;4;4;1	17;15;8;4;4;1	T-complex protein 1 subunit theta	Cct8	sp|P42932|TCPQ_MOUSE T-complex protein 1 subunit theta OS=Mus musculus OX=10090 GN=Cct8 PE=1 SV=3;tr|H3BL49|H3BL49_MOUSE CCT-theta OS=Mus musculus OX=10090 GN=Cct8 PE=1 SV=1	6	17	17	17	7	10	7	6	4	6	9	9	8	7	10	7	6	4	6	9	9	8	7	10	7	6	4	6	9	9	8	37	37	37	59.555	548	548;489;239;132;158;71	0	44.629
P43247	ENSMUSG00000024151	17685	P43247;G3UXD8;G3UWZ8	P43247	13;3;2	13;3;2	13;3;2	DNA mismatch repair protein Msh2	Msh2	sp|P43247|MSH2_MOUSE DNA mismatch repair protein Msh2 OS=Mus musculus OX=10090 GN=Msh2 PE=1 SV=1	3	13	13	13	6	3	7	5	5	7	6	7	9	6	3	7	5	5	7	6	7	9	6	3	7	5	5	7	6	7	9	17.5	17.5	17.5	104.15	935	935;210;68	0	35.339
P43274	ENSMUSG00000051627	50709	P43274	P43274	7	5	3	Histone H1.4	Hist1h1e	sp|P43274|H14_MOUSE Histone H1.4 OS=Mus musculus OX=10090 GN=H1-4 PE=1 SV=2	1	7	5	3	6	6	6	6	6	7	6	6	6	4	4	4	4	4	5	4	4	4	2	2	2	2	2	3	2	2	2	26	18.7	13.2	21.977	219	219	0	31.103
P43275	ENSMUSG00000049539	80838	P43275	P43275	10	10	8	Histone H1.1	Hist1h1a	sp|P43275|H11_MOUSE Histone H1.1 OS=Mus musculus OX=10090 GN=H1-1 PE=1 SV=2	1	10	10	8	10	9	10	10	10	9	9	10	10	10	9	10	10	10	9	9	10	10	8	7	8	8	8	7	7	8	8	36.6	36.6	29.1	21.785	213	213	0	323.31
P43276	ENSMUSG00000058773	56702	P43276	P43276	6	5	5	Histone H1.5	Hist1h1b	sp|P43276|H15_MOUSE Histone H1.5 OS=Mus musculus OX=10090 GN=H1-5 PE=1 SV=2	1	6	5	5	6	6	6	6	5	6	5	6	5	5	5	5	5	4	5	4	5	4	5	5	5	5	4	5	4	5	4	25.1	22	22	22.576	223	223	0	26.648
P43277	ENSMUSG00000052565	14957	P43277	P43277	7	3	2	Histone H1.3	Hist1h1d	sp|P43277|H13_MOUSE Histone H1.3 OS=Mus musculus OX=10090 GN=H1-3 PE=1 SV=2	1	7	3	2	6	6	6	6	6	7	6	6	6	2	2	2	2	2	3	2	2	2	1	1	1	1	1	2	1	1	1	25.8	13.1	7.7	22.099	221	221	0	18.132
P45376	ENSMUSG00000001642	11677	P45376;D3YVJ7	P45376;D3YVJ7	4;2	4;2	4;2	Aldose reductase	Akr1b1;Akr1b3	sp|P45376|ALDR_MOUSE Aldo-keto reductase family 1 member B1 OS=Mus musculus OX=10090 GN=Akr1b1 PE=1 SV=3;tr|D3YVJ7|D3YVJ7_MOUSE Aldo-keto reductase family 1, member B3 (aldose reductase) (Fragment) OS=Mus musculus OX=10090 GN=Akr1b3 PE=1 SV=1	2	4	4	4	3	0	2	3	0	3	2	3	3	3	0	2	3	0	3	2	3	3	3	0	2	3	0	3	2	3	3	14.2	14.2	14.2	35.732	316	316;176	0	18.558
P45591	ENSMUSG00000062929	12632	P45591	P45591	2	1	1	Cofilin-2	Cfl2	sp|P45591|COF2_MOUSE Cofilin-2 OS=Mus musculus OX=10090 GN=Cfl2 PE=1 SV=1	1	2	1	1	1	2	1	0	0	0	1	1	0	0	1	0	0	0	0	0	0	0	0	1	0	0	0	0	0	0	0	16.9	10.2	10.2	18.709	166	166	0	16.285
P45878	ENSMUSG00000056629	114841036	P45878	P45878	1	1	1	Peptidyl-prolyl cis-trans isomerase FKBP2	Fkbp2	sp|P45878|FKBP2_MOUSE Peptidyl-prolyl cis-trans isomerase FKBP2 OS=Mus musculus OX=10090 GN=Fkbp2 PE=1 SV=1	1	1	1	1	0	1	0	0	0	0	0	0	0	0	1	0	0	0	0	0	0	0	0	1	0	0	0	0	0	0	0	8.6	8.6	8.6	15.344	140	140	0.0013633	3.3376
P46460	ENSMUSG00000034187	18195	P46460	P46460	2	2	2	Vesicle-fusing ATPase	Nsf	sp|P46460|NSF_MOUSE Vesicle-fusing ATPase OS=Mus musculus OX=10090 GN=Nsf PE=1 SV=2	1	2	2	2	1	2	1	0	0	0	0	0	0	1	2	1	0	0	0	0	0	0	1	2	1	0	0	0	0	0	0	3.1	3.1	3.1	82.613	744	744	0	6.9148
Q8BVQ9	ENSMUSG00000028932	19181	Q8BVQ9;P46471	Q8BVQ9;P46471	11;11	11;11	11;11	26S protease regulatory subunit 7	Psmc2	tr|Q8BVQ9|Q8BVQ9_MOUSE 26S proteasome AAA-ATPase subunit RPT1 OS=Mus musculus OX=10090 GN=Psmc2 PE=1 SV=1;sp|P46471|PRS7_MOUSE 26S proteasome regulatory subunit 7 OS=Mus musculus OX=10090 GN=Psmc2 PE=1 SV=5	2	11	11	11	5	9	4	3	1	3	3	3	4	5	9	4	3	1	3	3	3	4	5	9	4	3	1	3	3	3	4	27.2	27.2	27.2	52.866	475	475;433	0	71.984
P47757-2	ENSMUSG00000028745	12345	P47757-2;A2AMW0;P47757;P47757-4;A0A0A0MQI9;F6YHZ8;F7CAZ6	P47757-2;A2AMW0;P47757;P47757-4;A0A0A0MQI9;F6YHZ8;F7CAZ6	7;6;6;6;4;4;4	7;6;6;6;4;4;4	7;6;6;6;4;4;4	F-actin-capping protein subunit beta	Capzb	sp|P47757-2|CAPZB_MOUSE Isoform 2 of F-actin-capping protein subunit beta OS=Mus musculus OX=10090 GN=Capzb;tr|A2AMW0|A2AMW0_MOUSE F-actin-capping protein subunit beta OS=Mus musculus OX=10090 GN=Capzb PE=1 SV=1;sp|P47757|CAPZB_MOUSE F-actin-capping protei	7	7	7	7	0	7	0	1	0	1	0	1	1	0	7	0	1	0	1	0	1	1	0	7	0	1	0	1	0	1	1	29	29	29	30.628	272	272;260;277;301;109;188;204	0	22.153
P47758	ENSMUSG00000032553	20818	P47758;A0A1W2P830	P47758	7;1	7;1	7;1	Signal recognition particle receptor subunit beta	Srprb	sp|P47758|SRPRB_MOUSE Signal recognition particle receptor subunit beta OS=Mus musculus OX=10090 GN=Srprb PE=1 SV=1	2	7	7	7	3	2	3	2	1	4	2	2	3	3	2	3	2	1	4	2	2	3	3	2	3	2	1	4	2	2	3	32.7	32.7	32.7	29.579	269	269;54	0	15.352
P47791-2	ENSMUSG00000031584	14782	P47791-2;P47791	P47791-2;P47791	2;2	2;2	2;2	Glutathione reductase, mitochondrial	Gsr	sp|P47791-2|GSHR_MOUSE Isoform Cytoplasmic of Glutathione reductase, mitochondrial OS=Mus musculus OX=10090 GN=Gsr;sp|P47791|GSHR_MOUSE Glutathione reductase, mitochondrial OS=Mus musculus OX=10090 GN=Gsr PE=1 SV=3	2	2	2	2	0	0	0	1	0	2	1	0	1	0	0	0	1	0	2	1	0	1	0	0	0	1	0	2	1	0	1	5.3	5.3	5.3	51.073	474	474;500	0.0014514	4.2287
P47911	ENSMUSG00000029614	19988	P47911;A0A0J9YU32	P47911	15;1	15;1	15;1	60S ribosomal protein L6	Rpl6	sp|P47911|RL6_MOUSE 60S ribosomal protein L6 OS=Mus musculus OX=10090 GN=Rpl6 PE=1 SV=3	2	15	15	15	13	13	12	13	14	14	12	13	15	13	13	12	13	14	14	12	13	15	13	13	12	13	14	14	12	13	15	41.9	41.9	41.9	33.509	296	296;74	0	317.32
P47915	ENSMUSG00000048758	19944	P47915;A0A1L1SUN1;A0A1L1SS27;W4VSN7	P47915;A0A1L1SUN1;A0A1L1SS27;W4VSN7	3;2;2;2	3;2;2;2	3;2;2;2	60S ribosomal protein L29	Rpl29;Gm3550	sp|P47915|RL29_MOUSE 60S ribosomal protein L29 OS=Mus musculus OX=10090 GN=Rpl29 PE=1 SV=2;tr|A0A1L1SUN1|A0A1L1SUN1_MOUSE 60S ribosomal protein L29 (Fragment) OS=Mus musculus OX=10090 GN=Rpl29 PE=1 SV=1;tr|A0A1L1SS27|A0A1L1SS27_MOUSE 60S ribosomal protein	4	3	3	3	2	2	2	1	3	1	2	2	2	2	2	2	1	3	1	2	2	2	2	2	2	1	3	1	2	2	2	18.8	18.8	18.8	17.587	160	160;94;140;160	0	46.048
P47955	ENSMUSG00000007892	56040	P47955	P47955	2	2	2	60S acidic ribosomal protein P1	Rplp1	sp|P47955|RLA1_MOUSE 60S acidic ribosomal protein P1 OS=Mus musculus OX=10090 GN=Rplp1 PE=1 SV=1	1	2	2	2	1	2	2	1	2	2	2	2	2	1	2	2	1	2	2	2	2	2	1	2	2	1	2	2	2	2	2	51.8	51.8	51.8	11.475	114	114	0	11.675
P47962	ENSMUSG00000058558	100503670	P47962;D3YYV8	P47962;D3YYV8	12;7	12;7	12;7	60S ribosomal protein L5	Rpl5	sp|P47962|RL5_MOUSE 60S ribosomal protein L5 OS=Mus musculus OX=10090 GN=Rpl5 PE=1 SV=3;tr|D3YYV8|D3YYV8_MOUSE 60S ribosomal protein L5 (Fragment) OS=Mus musculus OX=10090 GN=Rpl5 PE=1 SV=1	2	12	12	12	11	10	9	9	9	9	8	11	7	11	10	9	9	9	9	8	11	7	11	10	9	9	9	9	8	11	7	39.7	39.7	39.7	34.4	297	297;163	0	105.84
P47963	ENSMUSG00000000740	270106	P47963	P47963	9	9	9	60S ribosomal protein L13	Rpl13	sp|P47963|RL13_MOUSE 60S ribosomal protein L13 OS=Mus musculus OX=10090 GN=Rpl13 PE=1 SV=3	1	9	9	9	7	8	7	6	8	6	8	8	9	7	8	7	6	8	6	8	8	9	7	8	7	6	8	6	8	8	9	42.2	42.2	42.2	24.305	211	211	0	209.76
P48678	ENSMUSG00000028063	16905	P48678;P48678-2;P48678-3;D3YUF7	P48678;P48678-2;P48678-3	23;21;17;4	23;21;17;4	21;19;15;4	Prelamin-A/C;Lamin-A/C	Lmna	sp|P48678|LMNA_MOUSE Prelamin-A/C OS=Mus musculus OX=10090 GN=Lmna PE=1 SV=2;sp|P48678-2|LMNA_MOUSE Isoform C of Prelamin-A/C OS=Mus musculus OX=10090 GN=Lmna;sp|P48678-3|LMNA_MOUSE Isoform C2 of Prelamin-A/C OS=Mus musculus OX=10090 GN=Lmna	4	23	23	21	1	23	1	1	0	2	0	2	0	1	23	1	1	0	2	0	2	0	1	21	1	1	0	2	0	2	0	37	37	35.6	74.237	665	665;574;462;117	0	265.26
P48758	ENSMUSG00000051483	12408	P48758;A0A338P684	P48758	5;2	5;2	3;2	Carbonyl reductase [NADPH] 1	Cbr1	sp|P48758|CBR1_MOUSE Carbonyl reductase [NADPH] 1 OS=Mus musculus OX=10090 GN=Cbr1 PE=1 SV=3	2	5	5	3	1	3	0	1	0	0	1	0	3	1	3	0	1	0	0	1	0	3	1	1	0	1	0	0	1	0	2	20.6	20.6	10.8	30.641	277	277;134	0	13.749
Q5EBP8	ENSMUSG00000046434	15382	Q5EBP8;P49312;P49312-2;V9GXF8	Q5EBP8;P49312;P49312-2	9;9;7;1	8;8;6;1	8;8;6;1	Heterogeneous nuclear ribonucleoprotein A1;Heterogeneous nuclear ribonucleoprotein A1, N-terminally processed	Hnrnpa1	tr|Q5EBP8|Q5EBP8_MOUSE Helix-destabilizing protein OS=Mus musculus OX=10090 GN=Hnrnpa1 PE=1 SV=1;sp|P49312|ROA1_MOUSE Heterogeneous nuclear ribonucleoprotein A1 OS=Mus musculus OX=10090 GN=Hnrnpa1 PE=1 SV=2;sp|P49312-2|ROA1_MOUSE Isoform Short of Heterogen	4	9	8	8	6	7	7	7	5	6	5	6	7	6	7	7	7	5	5	5	6	7	6	7	7	7	5	5	5	6	7	28.4	28.4	28.4	38.833	373	373;320;268;45	0	62.825
P49452	ENSMUSG00000029253	12617	P49452	P49452	5	5	5	Centromere protein C	Cenpc	sp|P49452|CENPC_MOUSE Centromere protein C OS=Mus musculus OX=10090 GN=Cenpc PE=1 SV=2	1	5	5	5	1	0	1	2	0	0	2	2	0	1	0	1	2	0	0	2	2	0	1	0	1	2	0	0	2	2	0	8.1	8.1	8.1	102.15	906	906	0	15.138
P49717	ENSMUSG00000022673	17217	P49717;A0A2R8VHP7;Q9CWV1-2;Q9CWV1	P49717	22;4;1;1	22;4;1;1	22;4;1;1	DNA replication licensing factor MCM4	Mcm4	sp|P49717|MCM4_MOUSE DNA replication licensing factor MCM4 OS=Mus musculus OX=10090 GN=Mcm4 PE=1 SV=1	4	22	22	22	13	12	17	16	11	13	16	17	16	13	12	17	16	11	13	16	17	16	13	12	17	16	11	13	16	17	16	26.9	26.9	26.9	96.735	862	862;220;805;833	0	145.62
P49718	ENSMUSG00000005410	17218	P49718	P49718	30	30	30	DNA replication licensing factor MCM5	Mcm5	sp|P49718|MCM5_MOUSE DNA replication licensing factor MCM5 OS=Mus musculus OX=10090 GN=Mcm5 PE=1 SV=2	1	30	30	30	21	17	24	21	21	17	16	20	24	21	17	24	21	21	17	16	20	24	21	17	24	21	21	17	16	20	24	46.7	46.7	46.7	82.406	734	734	0	179.43
P49962	ENSMUSG00000026511	27058	P49962;D3YZX8	P49962	3;1	3;1	3;1	Signal recognition particle 9 kDa protein	Srp9	sp|P49962|SRP09_MOUSE Signal recognition particle 9 kDa protein OS=Mus musculus OX=10090 GN=Srp9 PE=1 SV=2	2	3	3	3	3	2	3	2	2	3	2	3	3	3	2	3	2	2	3	2	3	3	3	2	3	2	2	3	2	3	3	36	36	36	10.194	86	86;63	0	21.625
P50247	ENSMUSG00000048087	11615	P50247;A2ALT5	P50247	3;1	3;1	3;1	Adenosylhomocysteinase	Ahcy	sp|P50247|SAHH_MOUSE Adenosylhomocysteinase OS=Mus musculus OX=10090 GN=Ahcy PE=1 SV=3	2	3	3	3	0	3	1	0	0	1	0	1	0	0	3	1	0	0	1	0	1	0	0	3	1	0	0	1	0	1	0	8.8	8.8	8.8	47.688	432	432;95	0	15.278
P50543	ENSMUSG00000027907	20195	P50543	P50543	3	3	3	Protein S100-A11	S100a11	sp|P50543|S10AB_MOUSE Protein S100-A11 OS=Mus musculus OX=10090 GN=S100a11 PE=1 SV=1	1	3	3	3	0	3	0	0	0	0	0	0	0	0	3	0	0	0	0	0	0	0	0	3	0	0	0	0	0	0	0	34.7	34.7	34.7	11.083	98	98	0	7.7507
P50580-2	ENSMUSG00000025364	18813	P50580-2;P50580	P50580-2;P50580	8;8	8;8	8;8	Proliferation-associated protein 2G4	Pa2g4	sp|P50580-2|PA2G4_MOUSE Isoform 2 of Proliferation-associated protein 2G4 OS=Mus musculus OX=10090 GN=Pa2g4;sp|P50580|PA2G4_MOUSE Proliferation-associated protein 2G4 OS=Mus musculus OX=10090 GN=Pa2g4 PE=1 SV=3	2	8	8	8	0	7	0	0	0	0	1	1	0	0	7	0	0	0	0	1	1	0	0	7	0	0	0	0	1	1	0	29.4	29.4	29.4	37.971	340	340;394	0	20.37
P51150	ENSMUSG00000079477	19349	P51150;A0A0N4SVG9;A0A0N4SVR6	P51150;A0A0N4SVG9	8;4;3	8;4;3	8;4;3	Ras-related protein Rab-7a	Rab7a	sp|P51150|RAB7A_MOUSE Ras-related protein Rab-7a OS=Mus musculus OX=10090 GN=Rab7a PE=1 SV=2;tr|A0A0N4SVG9|A0A0N4SVG9_MOUSE RAB7, member RAS oncogene family (Fragment) OS=Mus musculus OX=10090 GN=Rab7 PE=1 SV=3	3	8	8	8	0	8	0	0	0	0	0	0	0	0	8	0	0	0	0	0	0	0	0	8	0	0	0	0	0	0	0	51.2	51.2	51.2	23.489	207	207;98;88	0	43.56
P51410	ENSMUSG00000047215	20005	P51410;A0A0G2JES3;A0A140T8T4;D3Z629;D3YZT0;A0A0G2JFQ3;S4R1R7	P51410;A0A0G2JES3;A0A140T8T4;D3Z629	7;6;6;5;3;2;1	7;6;6;5;3;2;1	7;6;6;5;3;2;1	60S ribosomal protein L9	Rpl9	sp|P51410|RL9_MOUSE 60S ribosomal protein L9 OS=Mus musculus OX=10090 GN=Rpl9 PE=1 SV=2;tr|A0A0G2JES3|A0A0G2JES3_MOUSE 60S ribosomal protein L9 (Fragment) OS=Mus musculus OX=10090 GN=Rpl9 PE=1 SV=1;tr|A0A140T8T4|A0A140T8T4_MOUSE 60S ribosomal protein L9 OS	7	7	7	7	4	6	6	7	6	5	7	5	7	4	6	6	7	6	5	7	5	7	4	6	6	7	6	5	7	5	7	43.8	43.8	43.8	21.881	192	192;191;192;166;108;66;191	0	139.05
P51655	ENSMUSG00000031119	14735	P51655	P51655	2	2	2	Glypican-4;Secreted glypican-4	Gpc4	sp|P51655|GPC4_MOUSE Glypican-4 OS=Mus musculus OX=10090 GN=Gpc4 PE=1 SV=2	1	2	2	2	1	0	1	0	0	0	0	0	0	1	0	1	0	0	0	0	0	0	1	0	1	0	0	0	0	0	0	4.8	4.8	4.8	62.586	557	557	0.0026076	2.904
P51859	ENSMUSG00000004897	15191	P51859;E0CYW7;E0CXA0	P51859;E0CYW7;E0CXA0	2;1;1	1;1;1	1;1;1	Hepatoma-derived growth factor	Hdgf	sp|P51859|HDGF_MOUSE Hepatoma-derived growth factor OS=Mus musculus OX=10090 GN=Hdgf PE=1 SV=2;tr|E0CYW7|E0CYW7_MOUSE Hepatoma-derived growth factor OS=Mus musculus OX=10090 GN=Hdgf PE=1 SV=1;tr|E0CXA0|E0CXA0_MOUSE Hepatoma-derived growth factor (Fragment)	3	2	1	1	0	1	1	0	0	1	1	1	0	0	1	0	0	0	0	0	0	0	0	1	0	0	0	0	0	0	0	10.1	6.8	6.8	26.268	237	237;84;202	0	6.7971
P51881	ENSMUSG00000016319	11740	P51881;P48962	P51881;P48962	8;5	5;2	5;2	ADP/ATP translocase 2;ADP/ATP translocase 2, N-terminally processed;ADP/ATP translocase 1	Slc25a5;Slc25a4	sp|P51881|ADT2_MOUSE ADP/ATP translocase 2 OS=Mus musculus OX=10090 GN=Slc25a5 PE=1 SV=3;sp|P48962|ADT1_MOUSE ADP/ATP translocase 1 OS=Mus musculus OX=10090 GN=Slc25a4 PE=1 SV=4	2	8	5	5	5	7	4	3	4	2	3	5	5	2	4	1	0	1	0	0	2	2	2	4	1	0	1	0	0	2	2	27.5	18.1	18.1	32.931	298	298;298	0	11.173
P52293	ENSMUSG00000066878	16647	P52293;A2A600;A2A601;A6PW68;F2Z431;A2A602	P52293;A2A600;A2A601	8;4;4;3;2;2	8;4;4;3;2;2	8;4;4;3;2;2	Importin subunit alpha-1	Kpna2	sp|P52293|IMA1_MOUSE Importin subunit alpha-1 OS=Mus musculus OX=10090 GN=Kpna2 PE=1 SV=2;tr|A2A600|A2A600_MOUSE Importin subunit alpha-1 (Fragment) OS=Mus musculus OX=10090 GN=Kpna2 PE=1 SV=2;tr|A2A601|A2A601_MOUSE Importin subunit alpha-1 (Fragment) OS=M	6	8	8	8	6	5	6	7	4	6	7	7	6	6	5	6	7	4	6	7	7	6	6	5	6	7	4	6	7	7	6	23.4	23.4	23.4	57.927	529	529;163;170;189;75;80	0	74.338
P52431	ENSMUSG00000038644	18971	P52431;D6RFB8	P52431	5;2	5;2	5;2	DNA polymerase delta catalytic subunit	Pold1	sp|P52431|DPOD1_MOUSE DNA polymerase delta catalytic subunit OS=Mus musculus OX=10090 GN=Pold1 PE=1 SV=2	2	5	5	5	1	0	1	0	1	1	2	0	3	1	0	1	0	1	1	2	0	3	1	0	1	0	1	1	2	0	3	5	5	5	123.79	1105	1105;981	0	10.942
P52432	ENSMUSG00000067148	20016	P52432;G3UXX5;D3Z7Q8;G3UX92;D3Z3D6	P52432;G3UXX5;D3Z7Q8;G3UX92;D3Z3D6	4;3;3;2;2	4;3;3;2;2	4;3;3;2;2	DNA-directed RNA polymerases I and III subunit RPAC1	Polr1c	sp|P52432|RPAC1_MOUSE DNA-directed RNA polymerases I and III subunit RPAC1 OS=Mus musculus OX=10090 GN=Polr1c PE=1 SV=3;tr|G3UXX5|G3UXX5_MOUSE DNA-directed RNA polymerases I and III subunit RPAC1 (Fragment) OS=Mus musculus OX=10090 GN=Polr1c PE=1 SV=1;tr|D	5	4	4	4	2	2	3	2	1	1	2	3	1	2	2	3	2	1	1	2	3	1	2	2	3	2	1	1	2	3	1	16.5	16.5	16.5	39.106	346	346;170;255;103;260	0	21.419
P52480	ENSMUSG00000032294	18746	P52480;P52480-2;A0A1L1SU37;A0A1L1SQV8;A0A1L1SSN6;A0A1L1STV8;A0A1L1SUV0;A0A1L1ST52;E9Q509;G3X925;P53657	P52480;P52480-2;A0A1L1SU37	15;13;8;6;5;5;4;2;1;1;1	15;13;8;6;5;5;4;2;1;1;1	15;13;8;6;5;5;4;2;1;1;1	Pyruvate kinase PKM	Pkm	sp|P52480|KPYM_MOUSE Pyruvate kinase PKM OS=Mus musculus OX=10090 GN=Pkm PE=1 SV=4;sp|P52480-2|KPYM_MOUSE Isoform M1 of Pyruvate kinase PKM OS=Mus musculus OX=10090 GN=Pkm;tr|A0A1L1SU37|A0A1L1SU37_MOUSE Pyruvate kinase (Fragment) OS=Mus musculus OX=10090 G	11	15	15	15	2	15	4	2	1	1	2	4	3	2	15	4	2	1	1	2	4	3	2	15	4	2	1	1	2	4	3	36.3	36.3	36.3	57.844	531	531;531;232;187;176;184;155;102;543;574;574	0	73.976
Q6NSP9	ENSMUSG00000056758	15364	Q6NSP9;P52927	Q6NSP9;P52927	4;4	4;4	4;4	High mobility group protein HMGI-C	Hmga2	tr|Q6NSP9|Q6NSP9_MOUSE High mobility group protein HMGI-C OS=Mus musculus OX=10090 GN=Hmga2 PE=1 SV=1;sp|P52927|HMGA2_MOUSE High mobility group protein HMGI-C OS=Mus musculus OX=10090 GN=Hmga2 PE=1 SV=1	2	4	4	4	3	2	2	2	4	3	2	3	2	3	2	2	2	4	3	2	3	2	3	2	2	2	4	3	2	3	2	34.1	34.1	34.1	14.055	129	129;108	0	33.039
P53026	ENSMUSG00000037805	19896	P53026	P53026	12	1	1	60S ribosomal protein L10a	Rpl10a	sp|P53026|RL10A_MOUSE 60S ribosomal protein L10a OS=Mus musculus OX=10090 GN=Rpl10a PE=1 SV=3	1	12	1	1	8	10	10	11	11	8	11	10	10	1	1	1	1	1	1	1	1	1	1	1	1	1	1	1	1	1	1	41.5	6.5	6.5	24.916	217	217	0	5.2939
P53569	ENSMUSG00000024081	12607	P53569;A0A0R4J046;P53569-2;A0A3B2WCE8	P53569;A0A0R4J046;P53569-2	23;21;13;11	23;21;13;11	23;21;13;11	CCAAT/enhancer-binding protein zeta	Cebpz	sp|P53569|CEBPZ_MOUSE CCAAT/enhancer-binding protein zeta OS=Mus musculus OX=10090 GN=Cebpz PE=1 SV=2;tr|A0A0R4J046|A0A0R4J046_MOUSE CCAAT/enhancer-binding protein zeta OS=Mus musculus OX=10090 GN=Cebpz PE=1 SV=1;sp|P53569-2|CEBPZ_MOUSE Isoform CBF2 of CCA	4	23	23	23	11	10	12	17	15	15	11	14	13	11	10	12	17	15	15	11	14	13	11	10	12	17	15	15	11	14	13	26.1	26.1	26.1	120.26	1052	1052;1052;461;461	0	119.42
P53994	ENSMUSG00000047187	59021	P53994	P53994	3	3	3	Ras-related protein Rab-2A	Rab2a	sp|P53994|RAB2A_MOUSE Ras-related protein Rab-2A OS=Mus musculus OX=10090 GN=Rab2a PE=1 SV=1	1	3	3	3	0	3	0	0	0	0	0	0	0	0	3	0	0	0	0	0	0	0	0	3	0	0	0	0	0	0	0	20.8	20.8	20.8	23.547	212	212	0	18.608
P53996-2	ENSMUSG00000030057	12785	P53996-2;P53996-3;A0A0N4SVS6;P53996	P53996-2;P53996-3;A0A0N4SVS6;P53996	5;5;4;4	5;5;4;4	5;5;4;4	Cellular nucleic acid-binding protein	Cnbp	sp|P53996-2|CNBP_MOUSE Isoform 2 of Cellular nucleic acid-binding protein OS=Mus musculus OX=10090 GN=Cnbp;sp|P53996-3|CNBP_MOUSE Isoform 3 of Cellular nucleic acid-binding protein OS=Mus musculus OX=10090 GN=Cnbp;tr|A0A0N4SVS6|A0A0N4SVS6_MOUSE Cellular nu	4	5	5	5	3	2	2	4	4	5	4	4	4	3	2	2	4	4	5	4	4	4	3	2	2	4	4	5	4	4	4	36.5	36.5	36.5	18.742	170	170;177;171;178	0	35.465
P54276	ENSMUSG00000005370	17688	P54276;A0A3Q4EGF1	P54276	28;1	28;1	28;1	DNA mismatch repair protein Msh6	Msh6	sp|P54276|MSH6_MOUSE DNA mismatch repair protein Msh6 OS=Mus musculus OX=10090 GN=Msh6 PE=1 SV=3	2	28	28	28	22	10	16	18	10	15	13	16	17	22	10	16	18	10	15	13	16	17	22	10	16	18	10	15	13	16	17	27.7	27.7	27.7	151.08	1358	1358;167	0	87.064
Q3TN85	ENSMUSG00000003813	19358	Q3TN85;Q8CAP3;P54726;P54728	Q3TN85;Q8CAP3;P54726;P54728	2;2;2;2	2;2;2;2	2;2;2;2	UV excision repair protein RAD23 homolog A;UV excision repair protein RAD23 homolog B	Rad23a;Rad23b	tr|Q3TN85|Q3TN85_MOUSE UV excision repair protein RAD23 homolog A (Fragment) OS=Mus musculus OX=10090 GN=Rad23a PE=1 SV=1;tr|Q8CAP3|Q8CAP3_MOUSE UV excision repair protein RAD23 OS=Mus musculus OX=10090 GN=Rad23a PE=1 SV=1;sp|P54726|RD23A_MOUSE UV excision	4	2	2	2	0	2	0	0	0	0	0	0	0	0	2	0	0	0	0	0	0	0	0	2	0	0	0	0	0	0	0	5.3	5.3	5.3	34.834	322	322;362;363;416	0.0013803	3.4707
P54775	ENSMUSG00000030603	23996	P54775;A0A140LIZ5	P54775;A0A140LIZ5	6;5	6;5	6;5	26S protease regulatory subunit 6B	Psmc4	sp|P54775|PRS6B_MOUSE 26S proteasome regulatory subunit 6B OS=Mus musculus OX=10090 GN=Psmc4 PE=1 SV=2;tr|A0A140LIZ5|A0A140LIZ5_MOUSE 26S proteasome AAA-ATPase subunit RPT3 OS=Mus musculus OX=10090 GN=Psmc4 PE=1 SV=1	2	6	6	6	1	4	1	0	0	0	1	0	1	1	4	1	0	0	0	1	0	1	1	4	1	0	0	0	1	0	1	17.7	17.7	17.7	47.408	418	418;387	0	10.946
P54823	ENSMUSG00000032097	13209	P54823	P54823	10	10	10	Probable ATP-dependent RNA helicase DDX6	Ddx6	sp|P54823|DDX6_MOUSE Probable ATP-dependent RNA helicase DDX6 OS=Mus musculus OX=10090 GN=Ddx6 PE=1 SV=1	1	10	10	10	6	4	9	8	6	5	6	7	8	6	4	9	8	6	5	6	7	8	6	4	9	8	6	5	6	7	8	28.8	28.8	28.8	54.191	483	483	0	40.598
P55200-2	ENSMUSG00000002028	214162	P55200-2;P55200;D3Z5H5;S4R2S5;A0A1L1SQS9	P55200-2;P55200;D3Z5H5	15;15;8;5;1	15;15;8;5;1	15;15;8;5;1	Histone-lysine N-methyltransferase 2A;MLL cleavage product N320;MLL cleavage product C180	Kmt2a	sp|P55200-2|KMT2A_MOUSE Isoform 2 of Histone-lysine N-methyltransferase 2A OS=Mus musculus OX=10090 GN=Kmt2a;sp|P55200|KMT2A_MOUSE Histone-lysine N-methyltransferase 2A OS=Mus musculus OX=10090 GN=Kmt2a PE=1 SV=3;tr|D3Z5H5|D3Z5H5_MOUSE Histone-lysine N-met	5	15	15	15	7	2	6	7	8	7	10	10	10	7	2	6	7	8	7	10	10	10	7	2	6	7	8	7	10	10	10	5.9	5.9	5.9	429.36	3963	3963;3966;1438;629;173	0	66.502
Q32ME9	ENSMUSG00000044322	13505	Q32ME9;P55849-2;P55849	Q32ME9;P55849-2;P55849	2;2;1	2;2;1	2;2;1	Desmocollin-1	Dsc1	tr|Q32ME9|Q32ME9_MOUSE Desmocollin-1 OS=Mus musculus OX=10090 GN=Dsc1 PE=1 SV=1;sp|P55849-2|DSC1_MOUSE Isoform 1B of Desmocollin-1 OS=Mus musculus OX=10090 GN=Dsc1;sp|P55849|DSC1_MOUSE Desmocollin-1 OS=Mus musculus OX=10090 GN=Dsc1 PE=1 SV=2	3	2	2	2	1	1	2	1	1	1	1	1	1	1	1	2	1	1	1	1	1	1	1	1	2	1	1	1	1	1	1	1.7	1.7	1.7	92.771	832	832;839;886	0	9.0904
P55850-2	ENSMUSG00000059898	13507	P55850-2;P55850	P55850-2;P55850	1;1	1;1	1;1	Desmocollin-3	Dsc3	sp|P55850-2|DSC3_MOUSE Isoform 3B of Desmocollin-3 OS=Mus musculus OX=10090 GN=Dsc3;sp|P55850|DSC3_MOUSE Desmocollin-3 OS=Mus musculus OX=10090 GN=Dsc3 PE=1 SV=3	2	1	1	1	0	1	0	0	0	0	0	0	0	0	1	0	0	0	0	0	0	0	0	1	0	0	0	0	0	0	0	1.5	1.5	1.5	93.723	839	839;896	0	6.8837
P56183-2	ENSMUSG00000061032	18114	P56183-2;P56183-3;P56183;A0A1W2P7C5	P56183-2;P56183-3;P56183	9;9;9;2	9;9;9;2	9;9;9;2	Ribosomal RNA processing protein 1 homolog A	Rrp1	sp|P56183-2|RRP1_MOUSE Isoform 2 of Ribosomal RNA processing protein 1 homolog A OS=Mus musculus OX=10090 GN=Rrp1;sp|P56183-3|RRP1_MOUSE Isoform 3 of Ribosomal RNA processing protein 1 homolog A OS=Mus musculus OX=10090 GN=Rrp1;sp|P56183|RRP1_MOUSE Ribosom	4	9	9	9	4	2	4	4	6	4	3	4	3	4	2	4	4	6	4	3	4	3	4	2	4	4	6	4	3	4	3	32.7	32.7	32.7	50.012	443	443;459;494;82	0	65.27
Q3U4W8	ENSMUSG00000038429	22225	Q3U4W8;P56399;D3YYA5;D3Z4K7	Q3U4W8;P56399	7;7;2;1	7;7;2;1	7;7;2;1	Ubiquitin carboxyl-terminal hydrolase;Ubiquitin carboxyl-terminal hydrolase 5	Usp5	tr|Q3U4W8|Q3U4W8_MOUSE Ubiquitin carboxyl-terminal hydrolase OS=Mus musculus OX=10090 GN=Usp5 PE=1 SV=1;sp|P56399|UBP5_MOUSE Ubiquitin carboxyl-terminal hydrolase 5 OS=Mus musculus OX=10090 GN=Usp5 PE=1 SV=1	4	7	7	7	3	5	2	2	1	0	2	2	1	3	5	2	2	1	0	2	2	1	3	5	2	2	1	0	2	2	1	15.2	15.2	15.2	93.354	835	835;858;209;303	0	24.277
P56480	ENSMUSG00000025393	11947	P56480	P56480	12	12	12	ATP synthase subunit beta, mitochondrial	Atp5b	sp|P56480|ATPB_MOUSE ATP synthase subunit beta, mitochondrial OS=Mus musculus OX=10090 GN=Atp5f1b PE=1 SV=2	1	12	12	12	5	11	2	1	0	1	0	3	1	5	11	2	1	0	1	0	3	1	5	11	2	1	0	1	0	3	1	31.2	31.2	31.2	56.3	529	529	0	60.127
P56960	ENSMUSG00000017264	50912	P56960;Q8K366;F6VYQ6	P56960;Q8K366;F6VYQ6	17;15;12	17;15;12	17;15;12	Exosome component 10	Exosc10	sp|P56960|EXOSX_MOUSE Exosome component 10 OS=Mus musculus OX=10090 GN=Exosc10 PE=1 SV=2;tr|Q8K366|Q8K366_MOUSE Exosc10 protein OS=Mus musculus OX=10090 GN=Exosc10 PE=1 SV=1;tr|F6VYQ6|F6VYQ6_MOUSE Exosome component 10 OS=Mus musculus OX=10090 GN=Exosc10 PE	3	17	17	17	3	0	1	7	6	6	10	8	7	3	0	1	7	6	6	10	8	7	3	0	1	7	6	6	10	8	7	25.8	25.8	25.8	100.94	887	887;862;618	0	49.772
P57016	ENSMUSG00000041782	16763	P57016	P57016	1	1	1	Ladinin-1	Lad1	sp|P57016|LAD1_MOUSE Ladinin-1 OS=Mus musculus OX=10090 GN=Lad1 PE=1 SV=1	1	1	1	1	0	1	0	0	0	0	0	0	0	0	1	0	0	0	0	0	0	0	0	1	0	0	0	0	0	0	0	1.9	1.9	1.9	58.863	528	528	0.0019828	3.0237
P57784	ENSMUSG00000030512	68981	P57784	P57784	3	3	3	U2 small nuclear ribonucleoprotein A	Snrpa1	sp|P57784|RU2A_MOUSE U2 small nuclear ribonucleoprotein A OS=Mus musculus OX=10090 GN=Snrpa1 PE=1 SV=2	1	3	3	3	2	3	2	2	1	2	2	2	1	2	3	2	2	1	2	2	2	1	2	3	2	2	1	2	2	2	1	14.5	14.5	14.5	28.357	255	255	0	14.373
P58064	ENSMUSG00000039680	121022	P58064;A0A338P7H3	P58064;A0A338P7H3	3;2	3;2	3;2	28S ribosomal protein S6, mitochondrial	Mrps6	sp|P58064|RT06_MOUSE 28S ribosomal protein S6, mitochondrial OS=Mus musculus OX=10090 GN=Mrps6 PE=1 SV=3;tr|A0A338P7H3|A0A338P7H3_MOUSE Predicted gene, 49711 OS=Mus musculus OX=10090 GN=Gm49711 PE=3 SV=1	2	3	3	3	2	2	1	0	0	0	0	0	0	2	2	1	0	0	0	0	0	0	2	2	1	0	0	0	0	0	0	19.2	19.2	19.2	14.308	125	125;117	0	5.3955
P58252	ENSMUSG00000034994	13629	P58252	P58252	35	35	34	Elongation factor 2	Eef2	sp|P58252|EF2_MOUSE Elongation factor 2 OS=Mus musculus OX=10090 GN=Eef2 PE=1 SV=2	1	35	35	34	19	31	19	17	17	23	22	22	22	19	31	19	17	17	23	22	22	22	18	30	19	16	16	22	21	21	21	42.2	42.2	41	95.313	858	858	0	173.31
P58321	ENSMUSG00000035337	93841	P58321	P58321	3	3	1	Ubiquitin carboxyl-terminal hydrolase isozyme L4	Uchl4	sp|P58321|UCHL4_MOUSE Ubiquitin carboxyl-terminal hydrolase isozyme L4 OS=Mus musculus OX=10090 GN=Uchl4 PE=2 SV=1	1	3	3	1	1	2	1	1	0	0	0	1	1	1	2	1	1	0	0	0	1	1	0	1	0	0	0	0	0	0	0	16.3	16.3	3.9	26.45	233	233	0	7.6932
P59999	ENSMUSG00000079426	68089	P59999;Q3TX55;E9PWA7	P59999;Q3TX55;E9PWA7	4;2;2	4;2;2	4;2;2	Actin-related protein 2/3 complex subunit 4	Arpc4	sp|P59999|ARPC4_MOUSE Actin-related protein 2/3 complex subunit 4 OS=Mus musculus OX=10090 GN=Arpc4 PE=1 SV=3;tr|Q3TX55|Q3TX55_MOUSE Actin-related protein 2/3 complex subunit 4 OS=Mus musculus OX=10090 GN=Arpc4 PE=1 SV=1;tr|E9PWA7|E9PWA7_MOUSE Actin-relate	3	4	4	4	0	4	0	0	0	0	0	0	0	0	4	0	0	0	0	0	0	0	0	4	0	0	0	0	0	0	0	29.8	29.8	29.8	19.667	168	168;78;91	0	10.245
P60122	ENSMUSG00000030079	56505	P60122;D3YW60	P60122;D3YW60	3;2	3;2	3;2	RuvB-like 1	Ruvbl1	sp|P60122|RUVB1_MOUSE RuvB-like 1 OS=Mus musculus OX=10090 GN=Ruvbl1 PE=1 SV=1;tr|D3YW60|D3YW60_MOUSE RuvB-like helicase (Fragment) OS=Mus musculus OX=10090 GN=Ruvbl1 PE=1 SV=1	2	3	3	3	0	1	0	0	0	2	0	1	0	0	1	0	0	0	2	0	1	0	0	1	0	0	0	2	0	1	0	9.4	9.4	9.4	50.213	456	456;134	0	9.9984
P60335	ENSMUSG00000051695	23983	P60335;A0A087WR61;A0A087WSI1;A0A1L1SUS5;A0A1L1SRP9;A0A1L1SQ99;A0A087WRH3;A0A0R4J044;P57724	P60335	10;1;1;1;1;1;1;1;1	7;0;0;0;0;0;0;0;0	7;0;0;0;0;0;0;0;0	Poly(rC)-binding protein 1	Pcbp1	sp|P60335|PCBP1_MOUSE Poly(rC)-binding protein 1 OS=Mus musculus OX=10090 GN=Pcbp1 PE=1 SV=1	9	10	7	7	6	9	8	7	8	7	6	8	8	4	7	6	4	5	5	4	6	6	4	7	6	4	5	5	4	6	6	39.9	28.9	28.9	37.497	356	356;113;119;149;158;190;197;403;403	0	38.027
P60710	ENSMUSG00000029580	11461	P60710;E9Q1F2;F8WGM8;E9Q3M9	P60710;E9Q1F2	17;13;5;1	1;1;0;0	0;0;0;0	Actin, cytoplasmic 1;Actin, cytoplasmic 1, N-terminally processed	Actb	sp|P60710|ACTB_MOUSE Actin, cytoplasmic 1 OS=Mus musculus OX=10090 GN=Actb PE=1 SV=1;tr|E9Q1F2|E9Q1F2_MOUSE Actin, cytoplasmic 1 OS=Mus musculus OX=10090 GN=Actb PE=1 SV=1	4	17	1	0	13	17	14	12	12	12	11	12	12	1	1	1	1	1	1	1	1	1	0	0	0	0	0	0	0	0	0	60	4.5	0	41.736	375	375;295;105;1175	0	30.726
Q3TLP8	ENSMUSG00000001847	19353	Q3TLP8;P63001;P60764;Q05144;A2AC13;A0A2R8VHH0;G3UZM2;D3Z3L1;F2Z463;D3YX61;A0A2R8VH29;A0A1B0GSL4;Q8R527;Q9ER71-2;P60766;P60766-1;Q9ER71	Q3TLP8;P63001;P60764;Q05144;A2AC13	3;3;3;2;2;1;1;1;1;1;1;1;1;1;1;1;1	3;3;3;2;2;1;1;1;1;1;1;1;1;1;1;1;1	2;2;2;1;2;1;0;0;0;0;0;0;0;0;0;0;0	Ras-related C3 botulinum toxin substrate 1;Ras-related C3 botulinum toxin substrate 3;Ras-related C3 botulinum toxin substrate 2	Rac1;Rac3;Rac2	tr|Q3TLP8|Q3TLP8_MOUSE Ras-related C3 botulinum toxin substrate 1 OS=Mus musculus OX=10090 GN=Rac1 PE=1 SV=1;sp|P63001|RAC1_MOUSE Ras-related C3 botulinum toxin substrate 1 OS=Mus musculus OX=10090 GN=Rac1 PE=1 SV=1;sp|P60764|RAC3_MOUSE Ras-related C3 botu	17	3	3	2	0	3	0	0	0	0	0	0	0	0	3	0	0	0	0	0	0	0	0	2	0	0	0	0	0	0	0	13.3	13.3	8.1	23.432	211	211;192;192;192;185;80;96;153;167;171;36;83;205;204;191;191;214	0	5.1749
P60843	ENSMUSG00000059796	13681	P60843;Q8BTU6;P10630;P10630-2;A0A338P6X5;E9Q561	P60843;Q8BTU6;P10630;P10630-2	18;10;10;10;8;6	18;10;10;10;8;6	15;7;7;7;5;5	Eukaryotic initiation factor 4A-I;Eukaryotic initiation factor 4A-II;Eukaryotic initiation factor 4A-II, N-terminally processed	Eif4a1;Eif4a2	sp|P60843|IF4A1_MOUSE Eukaryotic initiation factor 4A-I OS=Mus musculus OX=10090 GN=Eif4a1 PE=1 SV=1;tr|Q8BTU6|Q8BTU6_MOUSE RNA helicase OS=Mus musculus OX=10090 GN=Eif4a2 PE=1 SV=1;sp|P10630|IF4A2_MOUSE Eukaryotic initiation factor 4A-II OS=Mus musculus O	6	18	18	15	16	16	14	16	14	13	14	16	16	16	16	14	16	14	13	14	16	16	14	15	12	14	13	11	12	14	14	48.8	48.8	42.9	46.153	406	406;362;407;408;322;312	0	220.36
P60867	ENSMUSG00000028234	67427	P60867	P60867	3	3	3	40S ribosomal protein S20	Rps20	sp|P60867|RS20_MOUSE 40S ribosomal protein S20 OS=Mus musculus OX=10090 GN=Rps20 PE=1 SV=1	1	3	3	3	3	3	3	2	3	3	2	2	3	3	3	3	2	3	3	2	2	3	3	3	3	2	3	3	2	2	3	25.2	25.2	25.2	13.373	119	119	0	53.633
P61027	ENSMUSG00000020671	19325	P61027	P61027	2	2	2	Ras-related protein Rab-10	Rab10	sp|P61027|RAB10_MOUSE Ras-related protein Rab-10 OS=Mus musculus OX=10090 GN=Rab10 PE=1 SV=1	1	2	2	2	0	2	0	0	0	0	0	0	0	0	2	0	0	0	0	0	0	0	0	2	0	0	0	0	0	0	0	11.5	11.5	11.5	22.541	200	200	0	39.218
P61089	ENSMUSG00000074781	93765	P61089;A0A1W2P7Z3;A0A087WPV1;Q9CQ37	P61089;A0A1W2P7Z3	4;2;1;1	4;2;1;1	4;2;1;1	Ubiquitin-conjugating enzyme E2 N	Ube2n	sp|P61089|UBE2N_MOUSE Ubiquitin-conjugating enzyme E2 N OS=Mus musculus OX=10090 GN=Ube2n PE=1 SV=1;tr|A0A1W2P7Z3|A0A1W2P7Z3_MOUSE Ubiquitin-conjugating enzyme E2 N OS=Mus musculus OX=10090 GN=Ube2n PE=1 SV=1	4	4	4	4	0	4	0	0	0	0	0	0	0	0	4	0	0	0	0	0	0	0	0	4	0	0	0	0	0	0	0	34.9	34.9	34.9	17.138	152	152;87;74;204	0	9.4777
P61161	ENSMUSG00000020152	66713	P61161	P61161	7	7	7	Actin-related protein 2	Actr2	sp|P61161|ARP2_MOUSE Actin-related protein 2 OS=Mus musculus OX=10090 GN=Actr2 PE=1 SV=1	1	7	7	7	0	7	0	0	0	0	0	0	0	0	7	0	0	0	0	0	0	0	0	7	0	0	0	0	0	0	0	20.6	20.6	20.6	44.76	394	394	0	20.273
P84078	ENSMUSG00000048076	11840	P84078;P61205;Q8BSL7;A2A6T9	P84078;P61205;Q8BSL7	8;8;7;1	8;8;7;1	4;4;4;1	ADP-ribosylation factor 1;ADP-ribosylation factor 3;ADP-ribosylation factor 2	Arf1;Arf3;Arf2	sp|P84078|ARF1_MOUSE ADP-ribosylation factor 1 OS=Mus musculus OX=10090 GN=Arf1 PE=1 SV=2;sp|P61205|ARF3_MOUSE ADP-ribosylation factor 3 OS=Mus musculus OX=10090 GN=Arf3 PE=2 SV=2;sp|Q8BSL7|ARF2_MOUSE ADP-ribosylation factor 2 OS=Mus musculus OX=10090 GN=A	4	8	8	4	2	7	3	4	1	1	2	3	3	2	7	3	4	1	1	2	3	3	1	4	2	1	1	0	1	2	2	57.5	57.5	24.3	20.697	181	181;181;181;101	0	26.41
P61255	ENSMUSG00000060938	19941	P61255;B1ARA3;B1ARA5	P61255;B1ARA3;B1ARA5	10;9;8	10;9;8	10;9;8	60S ribosomal protein L26	Rpl26	sp|P61255|RL26_MOUSE 60S ribosomal protein L26 OS=Mus musculus OX=10090 GN=Rpl26 PE=1 SV=1;tr|B1ARA3|B1ARA3_MOUSE 60S ribosomal protein L26 (Fragment) OS=Mus musculus OX=10090 GN=Rpl26 PE=1 SV=1;tr|B1ARA5|B1ARA5_MOUSE 60S ribosomal protein L26 OS=Mus muscu	3	10	10	10	6	7	8	9	9	8	9	10	9	6	7	8	9	9	8	9	10	9	6	7	8	9	9	8	9	10	9	45.5	45.5	45.5	17.258	145	145;103;143	0	178.01
P61358	ENSMUSG00000063316	19942	P61358;A2A4Q0	P61358	7;3	7;3	7;3	60S ribosomal protein L27	Rpl27	sp|P61358|RL27_MOUSE 60S ribosomal protein L27 OS=Mus musculus OX=10090 GN=Rpl27 PE=1 SV=2	2	7	7	7	5	5	6	6	5	6	6	5	7	5	5	6	6	5	6	6	5	7	5	5	6	6	5	6	6	5	7	43.4	43.4	43.4	15.798	136	136;87	0	89.788
P61514	ENSMUSG00000046330	19981	P61514;A0A1D5RL86	P61514;A0A1D5RL86	3;2	3;2	3;2	60S ribosomal protein L37a	Rpl37a	sp|P61514|RL37A_MOUSE 60S ribosomal protein L37a OS=Mus musculus OX=10090 GN=Rpl37a PE=1 SV=2;tr|A0A1D5RL86|A0A1D5RL86_MOUSE 60S ribosomal protein L37a (Fragment) OS=Mus musculus OX=10090 GN=Rpl37a PE=1 SV=1	2	3	3	3	3	1	1	3	2	2	2	3	3	3	1	1	3	2	2	2	3	3	3	1	1	3	2	2	2	3	3	41.3	41.3	41.3	10.275	92	92;60	0	20.278
P61620	ENSMUSG00000030082	53421	P61620;A2ATT9;Q9CYJ6;Q9JLR1	P61620;A2ATT9;Q9CYJ6;Q9JLR1	3;2;2;2	3;2;2;2	3;2;2;2	Protein transport protein Sec61 subunit alpha isoform 1;Protein transport protein Sec61 subunit alpha isoform 2	Sec61a1;Sec61a2	sp|P61620|S61A1_MOUSE Protein transport protein Sec61 subunit alpha isoform 1 OS=Mus musculus OX=10090 GN=Sec61a1 PE=1 SV=2;tr|A2ATT9|A2ATT9_MOUSE Protein transport protein Sec61 subunit alpha isoform 2 OS=Mus musculus OX=10090 GN=Sec61a2 PE=1 SV=1;tr|Q9CY	4	3	3	3	2	2	3	1	1	0	2	1	2	2	2	3	1	1	0	2	1	2	2	2	3	1	1	0	2	1	2	5.7	5.7	5.7	52.264	476	476;175;410;476	0	6.4956
P61750	ENSMUSG00000021877	11843	P61750;E9Q798;F6UFB9	P61750;E9Q798	6;4;2	2;2;2	2;2;2	ADP-ribosylation factor 4	Arf4	sp|P61750|ARF4_MOUSE ADP-ribosylation factor 4 OS=Mus musculus OX=10090 GN=Arf4 PE=1 SV=2;tr|E9Q798|E9Q798_MOUSE ADP-ribosylation factor 4 OS=Mus musculus OX=10090 GN=Arf4 PE=1 SV=1	3	6	2	2	1	4	1	3	1	1	4	2	2	1	2	1	1	1	1	2	1	1	1	2	1	1	1	1	2	1	1	45	9.4	9.4	20.396	180	180;153;60	0	4.812
P61965	ENSMUSG00000026917	140858	P61965;F6Q3W0	P61965;F6Q3W0	7;4	7;4	7;4	WD repeat-containing protein 5	Wdr5	sp|P61965|WDR5_MOUSE WD repeat-containing protein 5 OS=Mus musculus OX=10090 GN=Wdr5 PE=1 SV=1;tr|F6Q3W0|F6Q3W0_MOUSE WD repeat-containing protein 5 (Fragment) OS=Mus musculus OX=10090 GN=Wdr5 PE=1 SV=1	2	7	7	7	3	1	4	6	6	6	7	6	6	3	1	4	6	6	6	7	6	6	3	1	4	6	6	6	7	6	6	27.2	27.2	27.2	36.588	334	334;281	0	24.528
P61979	ENSMUSG00000021546	15387	P61979;P61979-2;H3BLL4;A0A286YDM3;H3BK96;A0A286YCM2;A0A286YEC4;A0A286YDH1	P61979;P61979-2;H3BLL4;A0A286YDM3;H3BK96	17;17;13;10;10;8;6;5	17;17;13;10;10;8;6;5	1;1;1;1;1;1;1;1	Heterogeneous nuclear ribonucleoprotein K	Hnrnpk	sp|P61979|HNRPK_MOUSE Heterogeneous nuclear ribonucleoprotein K OS=Mus musculus OX=10090 GN=Hnrnpk PE=1 SV=1;sp|P61979-2|HNRPK_MOUSE Isoform 2 of Heterogeneous nuclear ribonucleoprotein K OS=Mus musculus OX=10090 GN=Hnrnpk;tr|H3BLL4|H3BLL4_MOUSE Heterogene	8	17	17	1	15	14	13	16	15	13	11	15	14	15	14	13	16	15	13	11	15	14	1	1	1	0	1	1	1	1	1	52.7	52.7	7.8	50.976	463	463;464;394;230;256;192;150;143	0	162.19
P61982	ENSMUSG00000051391	22628	P61982	P61982	8	5	4	14-3-3 protein gamma;14-3-3 protein gamma, N-terminally processed	Ywhag	sp|P61982|1433G_MOUSE 14-3-3 protein gamma OS=Mus musculus OX=10090 GN=Ywhag PE=1 SV=2	1	8	5	4	1	8	2	0	0	0	1	1	0	0	5	0	0	0	0	0	0	0	0	4	0	0	0	0	0	0	0	36.4	25.5	21.5	28.302	247	247	0	54.307
P62082	ENSMUSG00000061477	20115	P62082	P62082	5	5	5	40S ribosomal protein S7	Rps7	sp|P62082|RS7_MOUSE 40S ribosomal protein S7 OS=Mus musculus OX=10090 GN=Rps7 PE=2 SV=1	1	5	5	5	2	3	2	4	3	2	3	3	2	2	3	2	4	3	2	3	3	2	2	3	2	4	3	2	3	3	2	30.4	30.4	30.4	22.127	194	194	0	14.8
P62137	ENSMUSG00000040385	19045	P62137	P62137	12	2	2	Serine/threonine-protein phosphatase PP1-alpha catalytic subunit	Ppp1ca	sp|P62137|PP1A_MOUSE Serine/threonine-protein phosphatase PP1-alpha catalytic subunit OS=Mus musculus OX=10090 GN=Ppp1ca PE=1 SV=1	1	12	2	2	5	9	6	6	6	6	7	4	8	0	2	0	0	0	0	0	0	0	0	2	0	0	0	0	0	0	0	46.1	6.4	6.4	37.54	330	330	0	4.8915
P62141	ENSMUSG00000014956	19046	P62141;A0A0J9YUU8;A0A0J9YUG2	P62141	13;3;2	13;3;2	4;1;1	Serine/threonine-protein phosphatase PP1-beta catalytic subunit	Ppp1cb	sp|P62141|PP1B_MOUSE Serine/threonine-protein phosphatase PP1-beta catalytic subunit OS=Mus musculus OX=10090 GN=Ppp1cb PE=1 SV=3	3	13	13	4	7	10	8	9	8	9	9	5	11	7	10	8	9	8	9	9	5	11	3	4	3	4	3	3	3	2	4	50.2	50.2	14.4	37.186	327	327;100;59	0	139.36
P62192	ENSMUSG00000021178	19179	P62192	P62192	4	4	4	26S protease regulatory subunit 4	Psmc1	sp|P62192|PRS4_MOUSE 26S proteasome regulatory subunit 4 OS=Mus musculus OX=10090 GN=Psmc1 PE=1 SV=1	1	4	4	4	1	3	1	3	1	1	2	2	3	1	3	1	3	1	1	2	2	3	1	3	1	3	1	1	2	2	3	13.6	13.6	13.6	49.184	440	440	0	14.638
P62196	ENSMUSG00000020708	19184	P62196;Q8K1K2	P62196;Q8K1K2	9;7	9;7	9;7	26S protease regulatory subunit 8	Psmc5	sp|P62196|PRS8_MOUSE 26S proteasome regulatory subunit 8 OS=Mus musculus OX=10090 GN=Psmc5 PE=1 SV=1;tr|Q8K1K2|Q8K1K2_MOUSE 26S proteasome regulatory subunit 8 OS=Mus musculus OX=10090 GN=Psmc5 PE=1 SV=1	2	9	9	9	4	6	4	4	1	3	4	3	5	4	6	4	4	1	3	4	3	5	4	6	4	4	1	3	4	3	5	28.3	28.3	28.3	45.626	406	406;348	0	28.68
P62242	ENSMUSG00000047675	100040298	P62242	P62242	10	10	10	40S ribosomal protein S8	Rps8	sp|P62242|RS8_MOUSE 40S ribosomal protein S8 OS=Mus musculus OX=10090 GN=Rps8 PE=1 SV=2	1	10	10	10	9	9	9	9	9	9	9	9	10	9	9	9	9	9	9	9	9	10	9	9	9	9	9	9	9	9	10	50	50	50	24.205	208	208	0	323.31
P62259	ENSMUSG00000020849	22627	P62259;F6WA09;D6REF3	P62259;F6WA09	8;4;3	6;3;2	6;3;2	14-3-3 protein epsilon	Ywhae	sp|P62259|1433E_MOUSE 14-3-3 protein epsilon OS=Mus musculus OX=10090 GN=Ywhae PE=1 SV=1;tr|F6WA09|F6WA09_MOUSE 14-3-3 protein epsilon (Fragment) OS=Mus musculus OX=10090 GN=Ywhae PE=1 SV=1	3	8	6	6	4	8	6	2	2	1	3	4	3	3	6	4	2	2	1	2	3	3	3	6	4	2	2	1	2	3	3	35.7	28.6	28.6	29.174	255	255;154;130	0	36.045
P62264	ENSMUSG00000024608	20044	P62264;D3YVF4;D3Z7I1	P62264;D3YVF4;D3Z7I1	5;4;4	5;4;4	5;4;4	40S ribosomal protein S14	Rps14	sp|P62264|RS14_MOUSE 40S ribosomal protein S14 OS=Mus musculus OX=10090 GN=Rps14 PE=1 SV=3;tr|D3YVF4|D3YVF4_MOUSE 40S ribosomal protein S14 (Fragment) OS=Mus musculus OX=10090 GN=Rps14 PE=1 SV=1;tr|D3Z7I1|D3Z7I1_MOUSE 40S ribosomal protein S14 (Fragment) O	3	5	5	5	5	4	3	5	3	5	4	5	4	5	4	3	5	3	5	4	5	4	5	4	3	5	3	5	4	5	4	36.4	36.4	36.4	16.273	151	151;119;138	0	74.108
P62267	ENSMUSG00000049517	66475	P62267	P62267	6	6	6	40S ribosomal protein S23	Rps23	sp|P62267|RS23_MOUSE 40S ribosomal protein S23 OS=Mus musculus OX=10090 GN=Rps23 PE=1 SV=3	1	6	6	6	6	6	6	6	6	6	6	6	5	6	6	6	6	6	6	6	6	5	6	6	6	6	6	6	6	6	5	48.3	48.3	48.3	15.807	143	143	0	73.38
P62281	ENSMUSG00000003429	27207	P62281;A0A1B0GRR3;A0A1B0GSE8	P62281;A0A1B0GRR3;A0A1B0GSE8	13;11;9	13;11;9	13;11;9	40S ribosomal protein S11	Rps11	sp|P62281|RS11_MOUSE 40S ribosomal protein S11 OS=Mus musculus OX=10090 GN=Rps11 PE=1 SV=3;tr|A0A1B0GRR3|A0A1B0GRR3_MOUSE 40S ribosomal protein S11 OS=Mus musculus OX=10090 GN=Rps11 PE=1 SV=1;tr|A0A1B0GSE8|A0A1B0GSE8_MOUSE 40S ribosomal protein S11 (Fragme	3	13	13	13	12	10	10	11	10	10	12	9	8	12	10	10	11	10	10	12	9	8	12	10	10	11	10	10	12	9	8	57	57	57	18.431	158	158;130;135	0	141.94
P62301	ENSMUSG00000090862	68052	P62301;Q921R2;A0A0U1RQ71	P62301;Q921R2	5;5;1	5;5;1	5;5;1	40S ribosomal protein S13	Rps13	sp|P62301|RS13_MOUSE 40S ribosomal protein S13 OS=Mus musculus OX=10090 GN=Rps13 PE=1 SV=2;tr|Q921R2|Q921R2_MOUSE 40S ribosomal protein S13 OS=Mus musculus OX=10090 GN=Rps13 PE=1 SV=1	3	5	5	5	5	5	5	5	5	4	4	5	5	5	5	5	5	5	4	4	5	5	5	5	5	5	5	4	4	5	5	35.1	35.1	35.1	17.222	151	151;140;53	0	19.893
P62305	ENSMUSG00000090553	20643	P62305;E9Q0W8;E9Q4F4	P62305;E9Q0W8;E9Q4F4	2;1;1	2;1;1	2;1;1	Small nuclear ribonucleoprotein E	Snrpe	sp|P62305|RUXE_MOUSE Small nuclear ribonucleoprotein E OS=Mus musculus OX=10090 GN=Snrpe PE=1 SV=1;tr|E9Q0W8|E9Q0W8_MOUSE Small nuclear ribonucleoprotein E OS=Mus musculus OX=10090 GN=Snrpe PE=1 SV=1;tr|E9Q4F4|E9Q4F4_MOUSE Small nuclear ribonucleoprotein E	3	2	2	2	0	1	0	0	0	1	0	0	1	0	1	0	0	0	1	0	0	1	0	1	0	0	0	1	0	0	1	25	25	25	10.803	92	92;52;91	0	5.2998
P62307	ENSMUSG00000020018	69878	P62307	P62307	5	5	5	Small nuclear ribonucleoprotein F	Snrpf	sp|P62307|RUXF_MOUSE Small nuclear ribonucleoprotein F OS=Mus musculus OX=10090 GN=Snrpf PE=1 SV=1	1	5	5	5	2	2	1	2	1	1	0	0	2	2	2	1	2	1	1	0	0	2	2	2	1	2	1	1	0	0	2	40.7	40.7	40.7	9.7251	86	86	0	19.84
P62309	ENSMUSG00000057278	68011	P62309	P62309	2	2	2	Small nuclear ribonucleoprotein G	Snrpg	sp|P62309|RUXG_MOUSE Small nuclear ribonucleoprotein G OS=Mus musculus OX=10090 GN=Snrpg PE=1 SV=1	1	2	2	2	2	2	2	1	2	1	1	1	2	2	2	2	1	2	1	1	1	2	2	2	2	1	2	1	1	1	2	25	25	25	8.496	76	76	0	5.3349
P62315	ENSMUSG00000002477	20641	P62315;A0A3Q4L381;A0A3Q4L2W0	P62315	4;1;1	4;1;1	4;1;1	Small nuclear ribonucleoprotein Sm D1	Snrpd1	sp|P62315|SMD1_MOUSE Small nuclear ribonucleoprotein Sm D1 OS=Mus musculus OX=10090 GN=Snrpd1 PE=1 SV=1	3	4	4	4	4	2	4	4	3	4	4	3	4	4	2	4	4	3	4	4	3	4	4	2	4	4	3	4	4	3	4	37.8	37.8	37.8	13.281	119	119;78;98	0	83.926
P62317	ENSMUSG00000040824	107686	P62317	P62317	6	6	6	Small nuclear ribonucleoprotein Sm D2	Snrpd2	sp|P62317|SMD2_MOUSE Small nuclear ribonucleoprotein Sm D2 OS=Mus musculus OX=10090 GN=Snrpd2 PE=1 SV=1	1	6	6	6	6	5	5	5	5	2	2	4	6	6	5	5	5	5	2	2	4	6	6	5	5	5	5	2	2	4	6	54.2	54.2	54.2	13.527	118	118	0	65.869
P62320	ENSMUSG00000020180	67332	P62320;A0A1W2P7K5	P62320	3;1	3;1	3;1	Small nuclear ribonucleoprotein Sm D3	Snrpd3	sp|P62320|SMD3_MOUSE Small nuclear ribonucleoprotein Sm D3 OS=Mus musculus OX=10090 GN=Snrpd3 PE=1 SV=1	2	3	3	3	3	2	2	2	1	2	2	2	2	3	2	2	2	1	2	2	2	2	3	2	2	2	1	2	2	2	2	20.6	20.6	20.6	13.916	126	126;84	0	9.6837
P62331	ENSMUSG00000044147	11845	P62331	P62331	1	1	1	ADP-ribosylation factor 6	Arf6	sp|P62331|ARF6_MOUSE ADP-ribosylation factor 6 OS=Mus musculus OX=10090 GN=Arf6 PE=1 SV=2	1	1	1	1	0	1	0	1	0	0	1	1	0	0	1	0	1	0	0	1	1	0	0	1	0	1	0	0	1	1	0	6.3	6.3	6.3	20.082	175	175	0.0097264	2.3957
P62334	ENSMUSG00000021832	67089	P62334	P62334	7	7	7	26S protease regulatory subunit 10B	Psmc6	sp|P62334|PRS10_MOUSE 26S proteasome regulatory subunit 10B OS=Mus musculus OX=10090 GN=Psmc6 PE=1 SV=1	1	7	7	7	4	6	4	3	1	3	3	6	5	4	6	4	3	1	3	3	6	5	4	6	4	3	1	3	3	6	5	24.4	24.4	24.4	44.172	389	389	0	25.111
P62702	ENSMUSG00000031320	20102	P62702;V9GWY0	P62702;V9GWY0	12;6	12;6	12;6	40S ribosomal protein S4, X isoform;40S ribosomal protein S4	Rps4x;Gm15013	sp|P62702|RS4X_MOUSE 40S ribosomal protein S4, X isoform OS=Mus musculus OX=10090 GN=Rps4x PE=1 SV=2;tr|V9GWY0|V9GWY0_MOUSE 40S ribosomal protein S4 OS=Mus musculus OX=10090 GN=Gm15013 PE=3 SV=1	2	12	12	12	6	10	7	9	8	7	7	10	9	6	10	7	9	8	7	7	10	9	6	10	7	9	8	7	7	10	9	47.5	47.5	47.5	29.597	263	263;266	0	126.38
P62715	ENSMUSG00000009630	19053	P62715;P97470	P62715	5;1	1;0	1;0	Serine/threonine-protein phosphatase 2A catalytic subunit beta isoform	Ppp2cb	sp|P62715|PP2AB_MOUSE Serine/threonine-protein phosphatase 2A catalytic subunit beta isoform OS=Mus musculus OX=10090 GN=Ppp2cb PE=1 SV=1	2	5	1	1	0	5	0	0	0	0	0	0	0	0	1	0	0	0	0	0	0	0	0	1	0	0	0	0	0	0	0	23.9	4.2	4.2	35.575	309	309;307	0.0081149	2.5378
P62743	ENSMUSG00000008036	232910	P62743;A0A0U1RPS0	P62743;A0A0U1RPS0	2;1	2;1	2;1	AP-2 complex subunit sigma	Ap2s1	sp|P62743|AP2S1_MOUSE AP-2 complex subunit sigma OS=Mus musculus OX=10090 GN=Ap2s1 PE=1 SV=1;tr|A0A0U1RPS0|A0A0U1RPS0_MOUSE AP-2 complex subunit sigma OS=Mus musculus OX=10090 GN=Ap2s1 PE=1 SV=1	2	2	2	2	0	1	1	2	1	2	2	1	1	0	1	1	2	1	2	2	1	1	0	1	1	2	1	2	2	1	1	10.6	10.6	10.6	17.018	142	142;60	0	4.7124
P62751	ENSMUSG00000058546	108168140	P62751	P62751	10	10	10	60S ribosomal protein L23a	Rpl23a	sp|P62751|RL23A_MOUSE 60S ribosomal protein L23a OS=Mus musculus OX=10090 GN=Rpl23a PE=1 SV=1	1	10	10	10	9	9	10	9	9	10	8	9	9	9	9	10	9	9	10	8	9	9	9	9	10	9	9	10	8	9	9	44.2	44.2	44.2	17.695	156	156	0	145.9
P62754	ENSMUSG00000028495	20104	P62754	P62754	9	9	9	40S ribosomal protein S6	Rps6	sp|P62754|RS6_MOUSE 40S ribosomal protein S6 OS=Mus musculus OX=10090 GN=Rps6 PE=1 SV=1	1	9	9	9	8	7	6	8	8	7	8	9	7	8	7	6	8	8	7	8	9	7	8	7	6	8	8	7	8	9	7	32.9	32.9	32.9	28.68	249	249	0	119.39
P62806	ENSMUSG00000067455	319159	P62806	P62806	10	10	10	Histone H4	Hist1h4a	sp|P62806|H4_MOUSE Histone H4 OS=Mus musculus OX=10090 GN=H4c1 PE=1 SV=2	1	10	10	10	9	10	9	9	9	9	9	10	9	9	10	9	9	9	9	9	10	9	9	10	9	9	9	9	9	10	9	60.2	60.2	60.2	11.367	103	103	0	293.19
P62814	ENSMUSG00000006273	11966	P62814;A0A0U1RNU9;Q91YH6	P62814	8;2;2	8;2;2	8;2;2	V-type proton ATPase subunit B, brain isoform	Atp6v1b2	sp|P62814|VATB2_MOUSE V-type proton ATPase subunit B, brain isoform OS=Mus musculus OX=10090 GN=Atp6v1b2 PE=1 SV=1	3	8	8	8	0	8	0	0	0	0	0	0	0	0	8	0	0	0	0	0	0	0	0	8	0	0	0	0	0	0	0	21.9	21.9	21.9	56.55	511	511;215;513	0	45.426
Q5SW88	ENSMUSG00000020149	19324	Q5SW88;P62821;Q5SW87;A0A494BA38;A0A494BBL7;A0A494B945;Q9D1G1	Q5SW88;P62821;Q5SW87;A0A494BA38;A0A494BBL7;A0A494B945;Q9D1G1	4;4;3;2;2;2;2	4;4;3;2;2;2;2	4;4;3;2;2;2;2	Ras-related protein Rab-1A;Ras-related protein Rab-1B	Rab1;Rab1A;Rab1b	tr|Q5SW88|Q5SW88_MOUSE RAB1A, member RAS oncogene family OS=Mus musculus OX=10090 GN=Rab1a PE=1 SV=1;sp|P62821|RAB1A_MOUSE Ras-related protein Rab-1A OS=Mus musculus OX=10090 GN=Rab1A PE=1 SV=3;tr|Q5SW87|Q5SW87_MOUSE RAB1A, member RAS oncogene family OS=Mu	7	4	4	4	0	4	0	0	0	0	0	0	0	0	4	0	0	0	0	0	0	0	0	4	0	0	0	0	0	0	0	20.3	20.3	20.3	22.372	202	202;205;138;182;189;254;201	0	8.2263
P62827	ENSMUSG00000029430	19384	P62827;Q14AA6;Q61820	P62827;Q14AA6;Q61820	8;5;4	8;5;4	8;5;4	GTP-binding nuclear protein Ran;GTP-binding nuclear protein Ran, testis-specific isoform	Ran;1700009N14Rik;Rasl2-9	sp|P62827|RAN_MOUSE GTP-binding nuclear protein Ran OS=Mus musculus OX=10090 GN=Ran PE=1 SV=3;tr|Q14AA6|Q14AA6_MOUSE GTP-binding nuclear protein Ran OS=Mus musculus OX=10090 GN=1700009N14Rik PE=1 SV=1;sp|Q61820|RANT_MOUSE GTP-binding nuclear protein Ran, t	3	8	8	8	6	8	5	7	6	5	7	5	7	6	8	5	7	6	5	7	5	7	6	8	5	7	6	5	7	5	7	44.4	44.4	44.4	24.423	216	216;216;216	0	51.653
P62830	ENSMUSG00000071415	65019	P62830;A2A6F8	P62830	7;2	7;2	7;2	60S ribosomal protein L23	Rpl23	sp|P62830|RL23_MOUSE 60S ribosomal protein L23 OS=Mus musculus OX=10090 GN=Rpl23 PE=1 SV=1	2	7	7	7	6	4	6	5	5	4	5	6	6	6	4	6	5	5	4	5	6	6	6	4	6	5	5	4	5	6	6	62.1	62.1	62.1	14.865	140	140;60	0	104.29
P62849-2	ENSMUSG00000025290	20088	P62849-2;P62849-3;P62849;A0A286YEB7	P62849-2;P62849-3;P62849;A0A286YEB7	6;6;6;4	6;6;6;4	6;6;6;4	40S ribosomal protein S24	Rps24	sp|P62849-2|RS24_MOUSE Isoform 2 of 40S ribosomal protein S24 OS=Mus musculus OX=10090 GN=Rps24;sp|P62849-3|RS24_MOUSE Isoform 3 of 40S ribosomal protein S24 OS=Mus musculus OX=10090 GN=Rps24;sp|P62849|RS24_MOUSE 40S ribosomal protein S24 OS=Mus musculus O	4	6	6	6	6	6	6	5	6	5	6	6	5	6	6	6	5	6	5	6	6	5	6	6	6	5	6	5	6	6	5	36.2	36.2	36.2	15.069	130	130;131;133;118	0	41.413
P62855	ENSMUSG00000025362	27370	P62855	P62855	4	4	4	40S ribosomal protein S26	Rps26	sp|P62855|RS26_MOUSE 40S ribosomal protein S26 OS=Mus musculus OX=10090 GN=Rps26 PE=1 SV=3	1	4	4	4	4	4	4	3	3	4	3	3	4	4	4	4	3	3	4	3	3	4	4	4	4	3	3	4	3	3	4	42.6	42.6	42.6	13.015	115	115	0	21.809
P62869	ENSMUSG00000055839	67673	P62869;A0A3B2WBM3	P62869;A0A3B2WBM3	3;2	3;2	3;2	Transcription elongation factor B polypeptide 2	Tceb2	sp|P62869|ELOB_MOUSE Elongin-B OS=Mus musculus OX=10090 GN=Elob PE=1 SV=1;tr|A0A3B2WBM3|A0A3B2WBM3_MOUSE Elongin-B OS=Mus musculus OX=10090 GN=Elob PE=1 SV=1	2	3	3	3	2	2	2	1	1	1	1	2	2	2	2	2	1	1	1	1	2	2	2	2	2	1	1	1	1	2	2	24.6	24.6	24.6	13.17	118	118;90	0	5.4536
P62889	ENSMUSG00000058600	19946	P62889;A0A2I3BQF4	P62889;A0A2I3BQF4	8;6	8;6	8;6	60S ribosomal protein L30	Rpl30	sp|P62889|RL30_MOUSE 60S ribosomal protein L30 OS=Mus musculus OX=10090 GN=Rpl30 PE=1 SV=2;tr|A0A2I3BQF4|A0A2I3BQF4_MOUSE 60S ribosomal protein L30 OS=Mus musculus OX=10090 GN=Rpl30 PE=1 SV=1	2	8	8	8	7	7	8	8	8	8	7	8	8	7	7	8	8	8	8	7	8	8	7	7	8	8	8	8	7	8	8	67	67	67	12.784	115	115;94	0	312.57
P62892	ENSMUSG00000079641	67248	P62892	P62892	2	2	2	60S ribosomal protein L39	Rpl39	sp|P62892|RL39_MOUSE 60S ribosomal protein L39 OS=Mus musculus OX=10090 GN=Rpl39 PE=1 SV=2	1	2	2	2	2	2	2	1	2	2	2	2	2	2	2	2	1	2	2	2	2	2	2	2	2	1	2	2	2	2	2	19.6	19.6	19.6	6.4066	51	51	0	5.5798
P62900	ENSMUSG00000073702	114641	P62900;A0A0A6YX26;A0A0A6YXL3	P62900;A0A0A6YX26;A0A0A6YXL3	6;5;4	6;5;4	6;5;4	60S ribosomal protein L31	Rpl31	sp|P62900|RL31_MOUSE 60S ribosomal protein L31 OS=Mus musculus OX=10090 GN=Rpl31 PE=1 SV=1;tr|A0A0A6YX26|A0A0A6YX26_MOUSE 60S ribosomal protein L31 OS=Mus musculus OX=10090 GN=Rpl31 PE=1 SV=1;tr|A0A0A6YXL3|A0A0A6YXL3_MOUSE 60S ribosomal protein L31 OS=Mus	3	6	6	6	3	4	5	4	4	4	4	4	3	3	4	5	4	4	4	4	4	3	3	4	5	4	4	4	4	4	3	44.8	44.8	44.8	14.463	125	125;129;87	0	17.326
P62908	ENSMUSG00000030744	27050	P62908;D3YV43;A0A140LI77	P62908;D3YV43;A0A140LI77	19;13;10	19;13;10	19;13;10	40S ribosomal protein S3	Rps3	sp|P62908|RS3_MOUSE 40S ribosomal protein S3 OS=Mus musculus OX=10090 GN=Rps3 PE=1 SV=1;tr|D3YV43|D3YV43_MOUSE 40S ribosomal protein S3 OS=Mus musculus OX=10090 GN=Rps3 PE=1 SV=1;tr|A0A140LI77|A0A140LI77_MOUSE 40S ribosomal protein S3 OS=Mus musculus OX=10	3	19	19	19	18	18	17	16	18	17	16	14	17	18	18	17	16	18	17	16	14	17	18	18	17	16	18	17	16	14	17	77.4	77.4	77.4	26.674	243	243;191;144	0	173.82
P62911	ENSMUSG00000057841	19951	P62911;P17932	P62911	8;3	8;3	8;3	60S ribosomal protein L32	Rpl32	sp|P62911|RL32_MOUSE 60S ribosomal protein L32 OS=Mus musculus OX=10090 GN=Rpl32 PE=1 SV=2	2	8	8	8	5	5	5	7	7	6	8	5	7	5	5	5	7	7	6	8	5	7	5	5	5	7	7	6	8	5	7	51.1	51.1	51.1	15.86	135	135;135	0	117.24
P62918	ENSMUSG00000003970	26961	P62918	P62918	11	11	11	60S ribosomal protein L8	Rpl8	sp|P62918|RL8_MOUSE 60S ribosomal protein L8 OS=Mus musculus OX=10090 GN=Rpl8 PE=1 SV=2	1	11	11	11	8	8	9	9	8	9	8	9	9	8	8	9	9	8	9	8	9	9	8	8	9	9	8	9	8	9	9	49.8	49.8	49.8	28.024	257	257	0	323.31
P62960	ENSMUSG00000028639	22608	P62960;A2BGG7	P62960;A2BGG7	16;8	16;8	13;8	Nuclease-sensitive element-binding protein 1	Ybx1	sp|P62960|YBOX1_MOUSE Y-box-binding protein 1 OS=Mus musculus OX=10090 GN=Ybx1 PE=1 SV=3;tr|A2BGG7|A2BGG7_MOUSE Y-box-binding protein 1 (Fragment) OS=Mus musculus OX=10090 GN=Ybx1 PE=1 SV=1	2	16	16	13	15	13	15	15	14	14	13	13	14	15	13	15	15	14	14	13	13	14	12	11	12	12	12	11	10	10	11	63.4	63.4	52.2	35.73	322	322;214	0	323.31
P62965	ENSMUSG00000032291	12903	P62965	P62965	8	8	7	Cellular retinoic acid-binding protein 1	Crabp1	sp|P62965|RABP1_MOUSE Cellular retinoic acid-binding protein 1 OS=Mus musculus OX=10090 GN=Crabp1 PE=1 SV=2	1	8	8	7	6	5	5	6	3	4	5	5	7	6	5	5	6	3	4	5	5	7	5	4	5	5	3	3	4	4	6	62.8	62.8	57.7	15.591	137	137	0	39.158
P62983	ENSMUSG00000020460	78294	P62983;A0A0A6YW67;E9Q9J0;E9Q4P0;E9Q5F6;E9QNP0;Q5SX22;P62984;P0CG49;P0CG50	P62983;A0A0A6YW67;E9Q9J0;E9Q4P0;E9Q5F6;E9QNP0;Q5SX22;P62984;P0CG49;P0CG50	7;4;4;4;4;4;4;4;4;4	7;4;4;4;4;4;4;4;4;4	7;4;4;4;4;4;4;4;4;4	Ubiquitin-40S ribosomal protein S27a;Ubiquitin;40S ribosomal protein S27a;Ubiquitin-60S ribosomal protein L40;Ubiquitin;60S ribosomal protein L40;Polyubiquitin-B;Ubiquitin;Polyubiquitin-C;Ubiquitin;Ubiquitin-related 1;Ubiquitin-related 2	Rps27a;Gm8797;Uba52;Kxd1;Ubc;Ubb	sp|P62983|RS27A_MOUSE Ubiquitin-40S ribosomal protein S27a OS=Mus musculus OX=10090 GN=Rps27a PE=1 SV=2;tr|A0A0A6YW67|A0A0A6YW67_MOUSE Predicted pseudogene 8797 OS=Mus musculus OX=10090 GN=Gm8797 PE=4 SV=1;tr|E9Q9J0|E9Q9J0_MOUSE 60S ribosomal protein L40 (	10	7	7	7	7	7	7	7	6	7	6	7	7	7	7	7	7	6	7	6	7	7	7	7	7	7	6	7	6	7	7	48.7	48.7	48.7	17.951	156	156;77;96;193;201;232;236;128;305;734	0	183.2
P62996	ENSMUSG00000022858	20462	P62996;F8WJG3;A0A0R4J1X8;P62996-2	P62996;F8WJG3	5;4;1;1	5;4;1;1	4;3;1;1	Transformer-2 protein homolog beta	Tra2b	sp|P62996|TRA2B_MOUSE Transformer-2 protein homolog beta OS=Mus musculus OX=10090 GN=Tra2b PE=1 SV=1;tr|F8WJG3|F8WJG3_MOUSE Transformer-2 protein homolog beta OS=Mus musculus OX=10090 GN=Tra2b PE=1 SV=1	4	5	5	4	4	4	5	5	4	4	5	5	4	4	4	5	5	4	4	5	5	4	3	3	4	4	3	3	4	4	3	19.8	19.8	16.7	33.665	288	288;188;38;38	0	46.527
P63005	ENSMUSG00000020745	18472	P63005;P63005-2	P63005;P63005-2	4;3	4;3	4;3	Platelet-activating factor acetylhydrolase IB subunit alpha	Pafah1b1	sp|P63005|LIS1_MOUSE Platelet-activating factor acetylhydrolase IB subunit beta OS=Mus musculus OX=10090 GN=Pafah1b1 PE=1 SV=2;sp|P63005-2|LIS1_MOUSE Isoform 2 of Platelet-activating factor acetylhydrolase IB subunit beta OS=Mus musculus OX=10090 GN=Pafah1	2	4	4	4	0	4	0	0	0	0	0	0	0	0	4	0	0	0	0	0	0	0	0	4	0	0	0	0	0	0	0	12.9	12.9	12.9	46.67	410	410;391	0	12.676
P63017	ENSMUSG00000015656	15481	P63017;Q504P4;D3Z5E2	P63017;Q504P4	23;22;6	23;22;6	14;13;4	Heat shock cognate 71 kDa protein	Hspa8	sp|P63017|HSP7C_MOUSE Heat shock cognate 71 kDa protein OS=Mus musculus OX=10090 GN=Hspa8 PE=1 SV=1;tr|Q504P4|Q504P4_MOUSE Heat shock cognate 71 kDa protein OS=Mus musculus OX=10090 GN=Hspa8 PE=1 SV=1	3	23	23	14	18	23	16	16	14	13	17	18	17	18	23	16	16	14	13	17	18	17	11	14	9	10	7	7	10	11	9	44.7	44.7	28.2	70.87	646	646;627;116	0	241.56
P63028	ENSMUSG00000060126	22070	P63028	P63028	1	1	1	Translationally-controlled tumor protein	Tpt1	sp|P63028|TCTP_MOUSE Translationally-controlled tumor protein OS=Mus musculus OX=10090 GN=Tpt1 PE=1 SV=1	1	1	1	1	1	0	1	0	1	0	0	0	0	1	0	1	0	1	0	0	0	0	1	0	1	0	1	0	0	0	0	8.1	8.1	8.1	19.462	172	172	0.0020422	3.3033
P63037	ENSMUSG00000028410	15502	P63037;B1AXY1;B1AXX9;B1AXY0	P63037;B1AXY1	8;4;3;3	8;4;3;3	8;4;3;3	DnaJ homolog subfamily A member 1	Dnaja1	sp|P63037|DNJA1_MOUSE DnaJ homolog subfamily A member 1 OS=Mus musculus OX=10090 GN=Dnaja1 PE=1 SV=1;tr|B1AXY1|B1AXY1_MOUSE DnaJ homolog subfamily A member 1 (Fragment) OS=Mus musculus OX=10090 GN=Dnaja1 PE=1 SV=1	4	8	8	8	7	6	4	8	4	3	6	6	6	7	6	4	8	4	3	6	6	6	7	6	4	8	4	3	6	6	6	31.5	31.5	31.5	44.868	397	397;278;128;208	0	38.875
P63038	ENSMUSG00000025980	15510	P63038;P63038-2;D3Z2F2;D3Z7J9	P63038	13;6;3;2	13;6;3;2	13;6;3;2	60 kDa heat shock protein, mitochondrial	Hspd1	sp|P63038|CH60_MOUSE 60 kDa heat shock protein, mitochondrial OS=Mus musculus OX=10090 GN=Hspd1 PE=1 SV=1	4	13	13	13	1	13	0	0	0	0	0	1	0	1	13	0	0	0	0	0	1	0	1	13	0	0	0	0	0	1	0	28.8	28.8	28.8	60.955	573	573;258;202;142	0	39.717
P63085	ENSMUSG00000063358	26413	P63085;A0A338P781	P63085;A0A338P781	2;1	2;1	2;1	Mitogen-activated protein kinase 1	Mapk1	sp|P63085|MK01_MOUSE Mitogen-activated protein kinase 1 OS=Mus musculus OX=10090 GN=Mapk1 PE=1 SV=3;tr|A0A338P781|A0A338P781_MOUSE Mitogen-activated protein kinase 1 (Fragment) OS=Mus musculus OX=10090 GN=Mapk1 PE=1 SV=1	2	2	2	2	0	2	0	0	0	0	0	0	0	0	2	0	0	0	0	0	0	0	0	2	0	0	0	0	0	0	0	10.6	10.6	10.6	41.275	358	358;108	0.0014035	3.6918
P63087	ENSMUSG00000004455	434233	P63087;P63087-2;A0A0G2JGC1;A0A0G2JFF1	P63087;P63087-2;A0A0G2JGC1;A0A0G2JFF1	12;12;11;7	4;4;4;2	3;3;3;1	Serine/threonine-protein phosphatase PP1-gamma catalytic subunit	Ppp1cc	sp|P63087|PP1G_MOUSE Serine/threonine-protein phosphatase PP1-gamma catalytic subunit OS=Mus musculus OX=10090 GN=Ppp1cc PE=1 SV=1;sp|P63087-2|PP1G_MOUSE Isoform 2 of Serine/threonine-protein phosphatase PP1-gamma catalytic subunit OS=Mus musculus OX=10090	4	12	4	3	7	7	7	9	9	8	10	7	10	3	2	3	4	4	2	4	4	4	2	1	2	3	3	2	3	3	3	44.9	11.8	7.4	36.983	323	323;337;273;292	0	26.876
P63101	ENSMUSG00000022285	22631	P63101;A0A2I3BQ03;D3YXN6;D3YXF4;D3YW45	P63101;A0A2I3BQ03	11;7;4;2;1	11;7;4;2;1	7;6;3;2;1	14-3-3 protein zeta/delta	Ywhaz	sp|P63101|1433Z_MOUSE 14-3-3 protein zeta/delta OS=Mus musculus OX=10090 GN=Ywhaz PE=1 SV=1;tr|A0A2I3BQ03|A0A2I3BQ03_MOUSE 14-3-3 protein zeta/delta (Fragment) OS=Mus musculus OX=10090 GN=Ywhaz PE=1 SV=1	5	11	11	7	4	11	5	1	1	2	3	4	3	4	11	5	1	1	2	3	4	3	2	7	2	1	0	1	1	2	2	49	49	37.6	27.771	245	245;166;88;44;26	0	208.9
P63154	ENSMUSG00000001767	66877	P63154	P63154	11	11	11	Crooked neck-like protein 1	Crnkl1	sp|P63154|CRNL1_MOUSE Crooked neck-like protein 1 OS=Mus musculus OX=10090 GN=Crnkl1 PE=1 SV=1	1	11	11	11	10	6	8	6	5	4	3	7	6	10	6	8	6	5	4	3	7	6	10	6	8	6	5	4	3	7	6	19.3	19.3	19.3	83.415	690	690	0	29.99
P63168	ENSMUSG00000009013	56455	P63168;Q9D0M5	P63168;Q9D0M5	2;1	2;1	2;1	Dynein light chain 1, cytoplasmic;Dynein light chain 2, cytoplasmic	Dynll1;Dynll2	sp|P63168|DYL1_MOUSE Dynein light chain 1, cytoplasmic OS=Mus musculus OX=10090 GN=Dynll1 PE=1 SV=1;sp|Q9D0M5|DYL2_MOUSE Dynein light chain 2, cytoplasmic OS=Mus musculus OX=10090 GN=Dynll2 PE=1 SV=1	2	2	2	2	1	1	2	2	0	1	1	1	1	1	1	2	2	0	1	1	1	1	1	1	2	2	0	1	1	1	1	37.1	37.1	37.1	10.366	89	89;89	0	100.76
P63260	ENSMUSG00000062825	11465	P63260;B1ATY1;G3UYG0	P63260	17;8;7	17;8;7	1;1;1	Actin, cytoplasmic 2;Actin, cytoplasmic 2, N-terminally processed	Actg1	sp|P63260|ACTG_MOUSE Actin, cytoplasmic 2 OS=Mus musculus OX=10090 GN=Actg1 PE=1 SV=1	3	17	17	1	13	17	14	12	12	12	11	12	12	13	17	14	12	12	12	11	12	12	1	1	1	1	1	1	1	1	1	60	60	4.5	41.792	375	375;153;132	0	323.31
P63276	ENSMUSG00000061787	20068	P63276	P63276	1	1	1	40S ribosomal protein S17	Rps17	sp|P63276|RS17_MOUSE 40S ribosomal protein S17 OS=Mus musculus OX=10090 GN=Rps17 PE=1 SV=2	1	1	1	1	0	1	1	1	1	1	1	1	1	0	1	1	1	1	1	1	1	1	0	1	1	1	1	1	1	1	1	8.1	8.1	8.1	15.524	135	135	0.001996	3.0832
P63325	ENSMUSG00000052146	67097	P63325	P63325	1	1	1	40S ribosomal protein S10	Rps10	sp|P63325|RS10_MOUSE 40S ribosomal protein S10 OS=Mus musculus OX=10090 GN=Rps10 PE=1 SV=1	1	1	1	1	0	1	0	1	0	0	1	0	1	0	1	0	1	0	0	1	0	1	0	1	0	1	0	0	1	0	1	8.5	8.5	8.5	18.916	165	165	0.0014399	4.1183
P63330	ENSMUSG00000020349	19052	P63330	P63330	5	5	1	Serine/threonine-protein phosphatase 2A catalytic subunit alpha isoform	Ppp2ca	sp|P63330|PP2AA_MOUSE Serine/threonine-protein phosphatase 2A catalytic subunit alpha isoform OS=Mus musculus OX=10090 GN=Ppp2ca PE=1 SV=1	1	5	5	1	0	5	0	0	0	0	0	0	0	0	5	0	0	0	0	0	0	0	0	1	0	0	0	0	0	0	0	23.9	23.9	4.2	35.608	309	309	0	28.144
P67984	ENSMUSG00000028936	19934	P67984	P67984	3	3	3	60S ribosomal protein L22	Rpl22	sp|P67984|RL22_MOUSE 60S ribosomal protein L22 OS=Mus musculus OX=10090 GN=Rpl22 PE=1 SV=2	1	3	3	3	2	3	3	3	3	2	2	3	2	2	3	3	3	3	2	2	3	2	2	3	3	3	3	2	2	3	2	39.1	39.1	39.1	14.759	128	128	0	61.542
P68040	ENSMUSG00000020372	14694	P68040	P68040	14	14	14	Guanine nucleotide-binding protein subunit beta-2-like 1;Guanine nucleotide-binding protein subunit beta-2-like 1, N-terminally processed	Gnb2l1	sp|P68040|RACK1_MOUSE Receptor of activated protein C kinase 1 OS=Mus musculus OX=10090 GN=Rack1 PE=1 SV=3	1	14	14	14	8	14	9	9	6	7	9	12	13	8	14	9	9	6	7	9	12	13	8	14	9	9	6	7	9	12	13	59	59	59	35.076	317	317	0	66.569
P68134	ENSMUSG00000031972	11459	P68134;P68033;P62737;P63268;A0A494B9T3;D3YZY0;A0A1D5RM20;D3Z2K3;A0A0U1RQ96	P68134;P68033;P62737;P63268;A0A494B9T3;D3YZY0	16;14;13;12;8;8;7;7;4	7;5;5;4;3;3;2;2;2	7;5;5;4;3;3;2;2;2	Actin, alpha skeletal muscle;Actin, alpha cardiac muscle 1;Actin, aortic smooth muscle;Actin, gamma-enteric smooth muscle	Acta1;Actc1;Acta2;Actg2	sp|P68134|ACTS_MOUSE Actin, alpha skeletal muscle OS=Mus musculus OX=10090 GN=Acta1 PE=1 SV=1;sp|P68033|ACTC_MOUSE Actin, alpha cardiac muscle 1 OS=Mus musculus OX=10090 GN=Actc1 PE=1 SV=1;sp|P62737|ACTA_MOUSE Actin, aortic smooth muscle OS=Mus musculus OX	9	16	7	7	13	13	11	8	8	8	7	15	7	5	4	3	1	1	1	1	7	1	5	4	3	1	1	1	1	7	1	53.3	28.4	28.4	42.051	377	377;377;377;376;214;221;151;195;195	0	124.08
P68254-2	ENSMUSG00000076432	22630	P68254-2;P68254	P68254-2;P68254	10;10	6;6	6;6	14-3-3 protein theta	Ywhaq	sp|P68254-2|1433T_MOUSE Isoform 2 of 14-3-3 protein theta OS=Mus musculus OX=10090 GN=Ywhaq;sp|P68254|1433T_MOUSE 14-3-3 protein theta OS=Mus musculus OX=10090 GN=Ywhaq PE=1 SV=1	2	10	6	6	7	9	7	5	3	3	5	8	5	5	5	4	5	2	2	3	6	4	5	5	4	5	2	2	3	6	4	46.9	35.4	35.4	27.7	243	243;245	0	123.19
P68372	ENSMUSG00000036752	227613	P68372;Q9D6F9;G3UZR1;CON__ENSEMBL:ENSBTAP00000025008;A2AQ07	P68372;Q9D6F9	22;17;3;3;3	22;17;3;3;3	4;3;0;0;0	Tubulin beta-4B chain;Tubulin beta-4A chain	Tubb4b;Tubb4a	sp|P68372|TBB4B_MOUSE Tubulin beta-4B chain OS=Mus musculus OX=10090 GN=Tubb4b PE=1 SV=1;sp|Q9D6F9|TBB4A_MOUSE Tubulin beta-4A chain OS=Mus musculus OX=10090 GN=Tubb4a PE=1 SV=3	5	22	22	4	20	22	22	21	18	21	21	22	22	20	22	22	21	18	21	21	22	22	3	4	4	4	4	4	4	4	4	72.1	72.1	16	49.83	445	445;444;66;536;451	0	323.31
P68510	ENSMUSG00000018965	22629	P68510	P68510	4	1	1	14-3-3 protein eta	Ywhah	sp|P68510|1433F_MOUSE 14-3-3 protein eta OS=Mus musculus OX=10090 GN=Ywhah PE=1 SV=2	1	4	1	1	1	4	2	0	0	0	1	1	0	0	1	0	0	0	0	0	0	0	0	1	0	0	0	0	0	0	0	17.1	5.7	5.7	28.211	246	246	0	23.774
P70124	ENSMUSG00000067006	20724	P70124;A0A087WQM9	P70124	5;1	5;1	5;1	Serpin B5	Serpinb5	sp|P70124|SPB5_MOUSE Serpin B5 OS=Mus musculus OX=10090 GN=Serpinb5 PE=1 SV=1	2	5	5	5	0	5	0	0	0	0	0	0	0	0	5	0	0	0	0	0	0	0	0	5	0	0	0	0	0	0	0	16.8	16.8	16.8	42.111	375	375;74	0	20.178
P70168	ENSMUSG00000001440	16211	P70168	P70168	6	6	6	Importin subunit beta-1	Kpnb1	sp|P70168|IMB1_MOUSE Importin subunit beta-1 OS=Mus musculus OX=10090 GN=Kpnb1 PE=1 SV=2	1	6	6	6	0	6	0	0	0	1	0	0	1	0	6	0	0	0	1	0	0	1	0	6	0	0	0	1	0	0	1	9.1	9.1	9.1	97.183	876	876	0	13.104
P70279	ENSMUSG00000036160	20935	P70279;A2ALA0	P70279;A2ALA0	13;9	13;9	13;9	Surfeit locus protein 6	Surf6	sp|P70279|SURF6_MOUSE Surfeit locus protein 6 OS=Mus musculus OX=10090 GN=Surf6 PE=1 SV=1;tr|A2ALA0|A2ALA0_MOUSE Surfeit locus protein 6 OS=Mus musculus OX=10090 GN=Surf6 PE=1 SV=1	2	13	13	13	10	11	10	11	10	10	9	9	11	10	11	10	11	10	10	9	9	11	10	11	10	11	10	10	9	9	11	29	29	29	41.234	355	355;208	0	60.565
P70296	ENSMUSG00000032959	23980	P70296;D3Z1V4;D6RHS6	P70296;D3Z1V4;D6RHS6	4;3;2	4;3;2	4;3;2	Phosphatidylethanolamine-binding protein 1;Hippocampal cholinergic neurostimulating peptide	Pebp1	sp|P70296|PEBP1_MOUSE Phosphatidylethanolamine-binding protein 1 OS=Mus musculus OX=10090 GN=Pebp1 PE=1 SV=3;tr|D3Z1V4|D3Z1V4_MOUSE Phosphatidylethanolamine-binding protein 1 OS=Mus musculus OX=10090 GN=Pebp1 PE=1 SV=1;tr|D6RHS6|D6RHS6_MOUSE Phosphatidylet	3	4	4	4	1	2	1	0	0	0	2	2	2	1	2	1	0	0	0	2	2	2	1	2	1	0	0	0	2	2	2	32.6	32.6	32.6	20.83	187	187;209;136	0	16.986
P70333	ENSMUSG00000045427	56258	P70333	P70333	12	6	6	Heterogeneous nuclear ribonucleoprotein H2	Hnrnph2	sp|P70333|HNRH2_MOUSE Heterogeneous nuclear ribonucleoprotein H2 OS=Mus musculus OX=10090 GN=Hnrnph2 PE=1 SV=1	1	12	6	6	9	7	8	7	5	6	6	8	7	4	2	4	3	1	2	1	2	3	4	2	4	3	1	2	1	2	3	34.5	18.7	18.7	49.279	449	449	0	53.959
P70372	ENSMUSG00000040028	15568	P70372	P70372	11	11	11	ELAV-like protein 1	Elavl1	sp|P70372|ELAV1_MOUSE ELAV-like protein 1 OS=Mus musculus OX=10090 GN=Elavl1 PE=1 SV=2	1	11	11	11	10	8	10	8	5	10	8	7	10	10	8	10	8	5	10	8	7	10	10	8	10	8	5	10	8	7	10	43.3	43.3	43.3	36.169	326	326	0	70.807
Q5SV02	ENSMUSG00000020380	19360	Q5SV02;P70388-2;P70388;E9PUJ2;A8Y5I3;P70388-3;P70388-4	Q5SV02;P70388-2;P70388;E9PUJ2;A8Y5I3;P70388-3;P70388-4	2;2;2;1;1;1;1	2;2;2;1;1;1;1	2;2;2;1;1;1;1	DNA repair protein RAD50	Rad50	tr|Q5SV02|Q5SV02_MOUSE DNA repair protein RAD50 OS=Mus musculus OX=10090 GN=Rad50 PE=1 SV=1;sp|P70388-2|RAD50_MOUSE Isoform 2 of DNA repair protein RAD50 OS=Mus musculus OX=10090 GN=Rad50;sp|P70388|RAD50_MOUSE DNA repair protein RAD50 OS=Mus musculus OX=10	7	2	2	2	0	0	1	0	0	0	1	0	0	0	0	1	0	0	0	1	0	0	0	0	1	0	0	0	1	0	0	1.6	1.6	1.6	153.54	1312	1312;1251;1312;551;657;426;496	0.0032237	2.815
P70399-6	ENSMUSG00000043909	27223	P70399-6;P70399-5;P70399;A0A5H1ZRL7;F6ZRL3	P70399-6;P70399-5;P70399;A0A5H1ZRL7	8;8;8;7;2	8;8;8;7;2	8;8;8;7;2	Tumor suppressor p53-binding protein 1	Tp53bp1	sp|P70399-6|TP53B_MOUSE Isoform 3 of TP53-binding protein 1 OS=Mus musculus OX=10090 GN=Tp53bp1;sp|P70399-5|TP53B_MOUSE Isoform 2 of TP53-binding protein 1 OS=Mus musculus OX=10090 GN=Tp53bp1;sp|P70399|TP53B_MOUSE TP53-binding protein 1 OS=Mus musculus OX=	5	8	8	8	5	3	6	5	3	3	4	4	5	5	3	6	5	3	3	4	4	5	5	3	6	5	3	3	4	4	5	15	15	15	109.74	1014	1014;1963;1969;1919;166	0	48.166
P70423	ENSMUSG00000031297	11989	P70423	P70423	1	1	1	Cationic amino acid transporter 3	Slc7a3	sp|P70423|CTR3_MOUSE Cationic amino acid transporter 3 OS=Mus musculus OX=10090 GN=Slc7a3 PE=2 SV=1	1	1	1	1	0	0	0	0	0	0	0	1	0	0	0	0	0	0	0	0	1	0	0	0	0	0	0	0	0	1	0	1.6	1.6	1.6	67.459	618	618	1	-2
Q60817	ENSMUSG00000061315	17938	Q60817;P70670	Q60817;P70670	3;3	3;3	3;3	Nascent polypeptide-associated complex subunit alpha;Nascent polypeptide-associated complex subunit alpha, muscle-specific form	Naca	sp|Q60817|NACA_MOUSE Nascent polypeptide-associated complex subunit alpha OS=Mus musculus OX=10090 GN=Naca PE=1 SV=1;sp|P70670|NACAM_MOUSE Nascent polypeptide-associated complex subunit alpha, muscle-specific form OS=Mus musculus OX=10090 GN=Naca PE=1 SV=2	2	3	3	3	0	3	0	0	0	0	0	0	0	0	3	0	0	0	0	0	0	0	0	3	0	0	0	0	0	0	0	19.1	19.1	19.1	23.384	215	215;2187	0	8.9002
P70696	ENSMUSG00000050799	319177	P70696	P70696	7	4	4	Histone H2B type 1-A	Hist1h2ba	sp|P70696|H2B1A_MOUSE Histone H2B type 1-A OS=Mus musculus OX=10090 GN=H2bc1 PE=1 SV=3	1	7	4	4	7	7	7	5	6	6	6	6	5	4	4	4	2	3	3	3	3	2	4	4	4	2	3	3	3	3	2	50.4	29.1	29.1	14.236	127	127	0	172.51
P70698	ENSMUSG00000028633	51797	P70698;P70303-3;P70303-2;P70303	P70698	9;2;2;2	9;2;2;2	9;2;2;2	CTP synthase 1	Ctps1	sp|P70698|PYRG1_MOUSE CTP synthase 1 OS=Mus musculus OX=10090 GN=Ctps1 PE=1 SV=2	4	9	9	9	4	3	4	3	2	2	6	6	6	4	3	4	3	2	2	6	6	6	4	3	4	3	2	2	6	6	6	19.5	19.5	19.5	66.682	591	591;521;535;586	0	34.348
P80313	ENSMUSG00000030007	12468	P80313;A0A0N4SV00;A0A0N4SUI8	P80313;A0A0N4SV00	5;4;1	5;4;1	5;4;1	T-complex protein 1 subunit eta	Cct7	sp|P80313|TCPH_MOUSE T-complex protein 1 subunit eta OS=Mus musculus OX=10090 GN=Cct7 PE=1 SV=1;tr|A0A0N4SV00|A0A0N4SV00_MOUSE T-complex protein 1 subunit eta OS=Mus musculus OX=10090 GN=Cct7 PE=1 SV=1	3	5	5	5	1	4	1	2	0	1	1	1	1	1	4	1	2	0	1	1	1	1	1	4	1	2	0	1	1	1	1	11.4	11.4	11.4	59.652	544	544;502;79	0	14.435
P80314	ENSMUSG00000034024	12461	P80314;A0A1W2P7B7;A0A1W2P871;A0A1W2P828;A0A1W2P6Q3	P80314	13;6;3;3;3	13;6;3;3;3	13;6;3;3;3	T-complex protein 1 subunit beta	Cct2	sp|P80314|TCPB_MOUSE T-complex protein 1 subunit beta OS=Mus musculus OX=10090 GN=Cct2 PE=1 SV=4	5	13	13	13	4	10	6	6	3	6	6	7	7	4	10	6	6	3	6	6	7	7	4	10	6	6	3	6	6	7	7	31.6	31.6	31.6	57.477	535	535;217;64;85;181	0	65.097
P80315	ENSMUSG00000007739	12464	P80315;G5E839;G3UYW5	P80315;G5E839	10;9;1	10;9;1	10;9;1	T-complex protein 1 subunit delta	Cct4	sp|P80315|TCPD_MOUSE T-complex protein 1 subunit delta OS=Mus musculus OX=10090 GN=Cct4 PE=1 SV=3;tr|G5E839|G5E839_MOUSE T-complex protein 1 subunit delta OS=Mus musculus OX=10090 GN=Cct4 PE=1 SV=1	3	10	10	10	4	7	5	6	5	4	6	5	7	4	7	5	6	5	4	6	5	7	4	7	5	6	5	4	6	5	7	20.4	20.4	20.4	58.066	539	539;509;120	0	36.63
P80316	ENSMUSG00000022234	12465	P80316;E0CZA1	P80316	8;3	8;3	8;3	T-complex protein 1 subunit epsilon	Cct5	sp|P80316|TCPE_MOUSE T-complex protein 1 subunit epsilon OS=Mus musculus OX=10090 GN=Cct5 PE=1 SV=1	2	8	8	8	2	7	2	2	1	1	4	4	4	2	7	2	2	1	1	4	4	4	2	7	2	2	1	1	4	4	4	19.2	19.2	19.2	59.623	541	541;199	0	56.876
Q52KG9	ENSMUSG00000029447	12466	Q52KG9;P80317;Q61390;B1AT05	Q52KG9;P80317	11;11;3;2	11;11;3;2	11;11;3;2	T-complex protein 1 subunit zeta	Cct6a	tr|Q52KG9|Q52KG9_MOUSE Chaperonin containing Tcp1, subunit 6a (Zeta) OS=Mus musculus OX=10090 GN=Cct6a PE=2 SV=1;sp|P80317|TCPZ_MOUSE T-complex protein 1 subunit zeta OS=Mus musculus OX=10090 GN=Cct6a PE=1 SV=3	4	11	11	11	7	9	7	8	2	6	6	9	5	7	9	7	8	2	6	6	9	5	7	9	7	8	2	6	6	9	5	23	23	23	58.076	531	531;531;531;492	0	78.987
[truncated: 792 more rows]
[truncated: 60 more columns]

## Sheet: PG
Protein.ID	ENSEMBL	ENTREZID	Protein names	Gene names	Fasta headers	Peptides	Razor + unique peptides	Unique peptides	Mol. weight [kDa]	Sequence length	Score	iBAQ H3_REP1	iBAQ H3_REP2	iBAQ H3_REP3	iBAQ K9ME2_REP1	iBAQ K9ME2_REP2	iBAQ K9ME2_REP3	iBAQ S10PH_REP1	iBAQ S10PH_REP2	iBAQ S10PH_REP3	LFQ intensity H3_REP1	LFQ intensity H3_REP2	LFQ intensity H3_REP3	LFQ intensity K9ME2_REP1	LFQ intensity K9ME2_REP2	LFQ intensity K9ME2_REP3	LFQ intensity S10PH_REP1	LFQ intensity S10PH_REP2	LFQ intensity S10PH_REP3	FC(K9ME2/H3)	FC(S10PH/H3)	p Value(K9ME2/H3)	p Value(S10PH/H3)	K9ME2	S10PH
[truncated: 1,615 more rows]

[truncated: 1 more sheets: Both binding]
