# Supplementary material for: Multi-Omics Approaches for Revealing the Epigenetic Regulation of Histone H3.1 during Spermatogonial Stem Cell Differentiation In Vitro
Source: Int J Mol Sci. 2023 Feb 7;24(4):3314. doi: 10.3390/ijms24043314 (PMC9958608; doi:10.3390/ijms24043314)
Supplement: Supplementary file 1 [file ijms-24-03314-s001.zip › Table S3.xls]

## Sheet: Sheet1
Gene ontology analysis of 8 transcription factors
ID	Term	Ontology Source	Term PValue	Term PValue Corrected with Bonferroni step down	Group PValue	Group PValue Corrected with Bonferroni step down	GOLevels	GOGroups	% Associated Genes	Nr. Genes	Associated Genes Found
GO:0006974	cellular response to DNA damage stimulus	GO_BiologicalProcess-EBI-UniProt-GOA-ACAP-ARAP_19.09.2022_00h00	0.000532318	0.0191635	2.32926e-06	2.32926e-06	[4]	Group0	0.45403	4	[Cbx3, Cbx5, Ruvbl2, Smc4]
GO:2001252	positive regulation of chromosome organization	GO_BiologicalProcess-EBI-UniProt-GOA-ACAP-ARAP_19.09.2022_00h00	0.00128381	0.0423658	2.32926e-06	2.32926e-06	[5, 6, 7]	Group0	1.75439	2	[Ruvbl2, Smc4]
GO:0031058	positive regulation of histone modification	GO_BiologicalProcess-EBI-UniProt-GOA-ACAP-ARAP_19.09.2022_00h00	0.00128381	0.0423658	2.32926e-06	2.32926e-06	[6, 7, 8]	Group0	1.75439	2	[Ruvbl2, Wdr5]
GO:0071169	establishment of protein localization to chromatin	GO_BiologicalProcess-EBI-UniProt-GOA-ACAP-ARAP_19.09.2022_00h00	5.73365e-06	0.000229346	2.32926e-06	2.32926e-06	[6, 8]	Group0	25	2	[Lrwd1, Ruvbl2]
GO:0006325	chromatin organization	GO_BiologicalProcess-EBI-UniProt-GOA-ACAP-ARAP_19.09.2022_00h00	2.90416e-09	1.19071e-07	1.12755e-09	2.2551e-09	[4]	Group1	1.08025	7	[Brd1, Cbx3, Cbx5, Lrwd1, Ruvbl2, Supt5, Wdr5]
GO:0006338	chromatin remodeling	GO_BiologicalProcess-EBI-UniProt-GOA-ACAP-ARAP_19.09.2022_00h00	2.3424e-05	0.000913537	1.12755e-09	2.2551e-09	[5]	Group1	1.01781	4	[Cbx3, Ruvbl2, Supt5, Wdr5]
GO:2001252	positive regulation of chromosome organization	GO_BiologicalProcess-EBI-UniProt-GOA-ACAP-ARAP_19.09.2022_00h00	0.00128381	0.0423658	1.12755e-09	2.2551e-09	[5, 6, 7]	Group1	1.75439	2	[Ruvbl2, Smc4]
GO:0018205	peptidyl-lysine modification	GO_BiologicalProcess-EBI-UniProt-GOA-ACAP-ARAP_19.09.2022_00h00	0.000894748	0.0313162	1.12755e-09	2.2551e-09	[6, 7]	Group1	0.705882	3	[Brd1, Ruvbl2, Wdr5]
GO:0031058	positive regulation of histone modification	GO_BiologicalProcess-EBI-UniProt-GOA-ACAP-ARAP_19.09.2022_00h00	0.00128381	0.0423658	1.12755e-09	2.2551e-09	[6, 7, 8]	Group1	1.75439	2	[Ruvbl2, Wdr5]
GO:0071169	establishment of protein localization to chromatin	GO_BiologicalProcess-EBI-UniProt-GOA-ACAP-ARAP_19.09.2022_00h00	5.73365e-06	0.000229346	1.12755e-09	2.2551e-09	[6, 8]	Group1	25	2	[Lrwd1, Ruvbl2]
GO:0016573	histone acetylation	GO_BiologicalProcess-EBI-UniProt-GOA-ACAP-ARAP_19.09.2022_00h00	8.02064e-05	0.00304784	1.12755e-09	2.2551e-09	[6, 7, 9, 10]	Group1	1.60428	3	[Brd1, Ruvbl2, Wdr5]
GO:0140673	co-transcriptional chromatin reassembly	GO_BiologicalProcess-EBI-UniProt-GOA-ACAP-ARAP_19.09.2022_00h00	0.000954494	0.0324528	1.12755e-09	2.2551e-09	[6, 8, 9, 10, 11, 12]	Group1	50	1	[Supt5]
