# Supplementary material for: Multi-Omics Approaches for Revealing the Epigenetic Regulation of Histone H3.1 during Spermatogonial Stem Cell Differentiation In Vitro
Source: Int J Mol Sci. 2023 Feb 7;24(4):3314. doi: 10.3390/ijms24043314 (PMC9958608; doi:10.3390/ijms24043314)
Supplement: Supplementary file 1 [file ijms-24-03314-s001.zip › Table S4.xlsx]

## Sheet: DEG 0h-24h
Differentially expressed genes between 0 hours and 24 hours
gene_name	baseMean	log2FoldChange	lfcSE	stat	pvalue	padj	diff24h_1.hisat2.count	diff24h_2.hisat2.count	diff24h_3.hisat2.count	diff48h_1.hisat2.count	diff48h_2.hisat2.count	diff48h_3.hisat2.count	SSC0h1.hisat2.count	SSC0h2.hisat2.count	SSC0h3.hisat2.count	significant
Stra8	8696.39	8.48238	0.205033	41.3707	0	0	17634	16791	19953	8856	11085	10078	50	39	54	24h>0h
Kit	5474.48	6.07689	0.168759	36.0093	5.98395e-284	6.76186e-280	12054	10892	10810	6128	7705	6590	159	160	152	24h>0h
Etv5	5068.23	-5.53185	0.160749	-34.4129	1.6164e-259	1.21769e-255	247	190	236	143	191	149	8068	10110	11369	0h>24h
Dusp6	3043.35	-5.72848	0.172416	-33.2248	4.71835e-242	2.66587e-238	138	105	110	105	127	102	5269	5960	6466	0h>24h
Sall3	1572.57	-6.06033	0.199636	-30.3568	2.04248e-202	9.23201e-199	49	56	40	69	88	52	2641	3277	3286	0h>24h
Lhx1	1404.77	-5.43332	0.180301	-30.1348	1.69818e-199	6.39649e-196	75	62	62	53	68	39	2278	3112	2787	0h>24h
Zic1	1564.74	-4.90347	0.170658	-28.7326	1.49244e-181	4.81844e-178	106	100	111	41	60	55	2314	3412	3335	0h>24h
Mpzl2	2115.95	-5.49329	0.193995	-28.3167	2.15244e-176	6.08064e-173	83	108	96	61	48	58	3955	4326	3920	0h>24h
Hs3st3b1	2055.43	-4.85406	0.176004	-27.5793	1.97245e-167	4.95304e-164	174	119	138	73	91	87	3243	4396	4202	0h>24h
Spry4	1100.79	-6.25391	0.228341	-27.3884	3.76589e-165	8.51092e-162	21	36	32	40	32	29	1844	2346	2268	0h>24h
Tcl1	833.392	-5.48407	0.203654	-26.9283	1.02385e-159	2.10354e-156	33	40	41	24	30	35	1407	1729	1703	0h>24h
Ret	6547.92	-3.7699	0.149882	-25.1524	1.33007e-139	2.50496e-136	974	863	966	587	828	722	9713	12217	14444	0h>24h
Rapgef3	1237.65	-3.58497	0.152211	-23.5526	1.1803e-122	2.0519e-119	186	199	211	75	81	73	1855	2566	2391	0h>24h
Pfkp	4329.83	-3.00699	0.128825	-23.3417	1.67254e-120	2.69996e-117	968	924	1112	412	536	466	6528	8489	7879	0h>24h
Crmp1	1104.44	-4.48479	0.203259	-22.0644	6.94472e-108	1.04634e-104	118	86	92	50	49	47	1659	2090	2559	0h>24h
Acta2	949.242	5.626	0.25575	21.9981	3.00359e-107	4.24258e-104	1667	1831	2339	3298	3309	3689	30	30	52	24h>0h
Tmc8	834.569	-5.27284	0.248062	-21.2561	2.89326e-100	3.84634e-97	59	35	38	11	13	19	1159	1798	1929	0h>24h
Slc38a1	2057.49	-2.82686	0.134206	-21.0636	1.71576e-98	2.15423e-95	572	495	525	397	534	440	3176	3789	3725	0h>24h
Dusp4	1784.11	-4.09794	0.19647	-20.8578	1.29435e-96	1.5396e-93	213	165	241	153	118	145	2553	3384	4143	0h>24h
Nefm	1991.9	-5.04118	0.242472	-20.7908	5.2448e-96	5.92662e-93	118	116	134	158	182	139	2323	5205	4207	0h>24h
Optn	1005.73	-3.14995	0.153885	-20.4696	4.02164e-93	4.32805e-90	204	190	245	155	180	159	1536	1968	1869	0h>24h
Ldlr	2372.27	-3.359	0.167276	-20.0806	1.09114e-89	1.12089e-86	445	416	459	467	628	525	3192	4549	5209	0h>24h
Epha2	4124.96	-3.58413	0.17854	-20.0747	1.22899e-89	1.20761e-86	719	570	704	352	390	302	5570	7900	9349	0h>24h
Flt1	1093.6	-3.28887	0.164821	-19.9542	1.37845e-88	1.29804e-85	189	219	227	200	182	162	1756	2217	1910	0h>24h
Etv4	2446.44	-3.88652	0.195643	-19.8654	8.11585e-88	7.33672e-85	340	312	318	164	238	169	3080	5093	5631	0h>24h
Foxc2	1136.42	-4.97219	0.251233	-19.7912	3.54675e-87	3.08294e-84	86	64	70	33	43	37	1436	2244	2958	0h>24h
Col3a1	3690.89	3.38624	0.17191	19.6977	2.25538e-86	1.88784e-83	6415	6716	7984	9825	10254	9391	599	584	718	24h>0h
Cyp26a1	387.26	4.17833	0.212236	19.6871	2.77893e-86	2.24299e-83	780	744	774	256	373	254	29	46	46	24h>0h
Bcl6b	3468.88	-3.60997	0.18354	-19.6685	4.01195e-86	3.12655e-83	618	494	534	535	793	597	4495	7167	7613	0h>24h
Erg	1169.11	2.7197	0.139434	19.5053	9.90532e-85	7.46201e-82	2237	1966	2157	2041	2297	1989	271	327	316	24h>0h
Sertad4	1854.07	2.55651	0.131525	19.4375	3.7198e-84	2.71185e-81	3511	3051	3369	2894	3714	3166	471	566	561	24h>0h
Esrp1	2163.61	-2.84191	0.147473	-19.2708	9.45278e-83	6.67603e-80	595	513	551	467	466	424	3567	3845	3790	0h>24h
Slc2a3	5278.05	-2.91506	0.153829	-18.95	4.41324e-80	3.0224e-77	1246	1268	1354	1205	1522	1350	7087	9758	11027	0h>24h
Pygl	2056.41	-2.91926	0.154233	-18.9275	6.76771e-80	4.49853e-77	487	461	558	367	430	377	2763	3996	4110	0h>24h
Gfra1	2525.94	-2.65575	0.141023	-18.832	4.13054e-79	2.66715e-76	791	647	731	325	457	340	3742	4402	4795	0h>24h
Il17rd	4674.32	-2.58774	0.137919	-18.7628	1.52295e-78	9.56074e-76	1556	1230	1395	1411	1722	1395	6648	8903	8312	0h>24h
Tubg2	606.248	-3.99996	0.214474	-18.6501	1.26012e-77	7.69695e-75	78	62	84	41	38	33	801	1305	1325	0h>24h
Pcdh12	344.304	-5.69448	0.306088	-18.604	2.97951e-77	1.77203e-74	16	8	17	15	30	20	497	765	764	0h>24h
Nxph4	1109.13	-4.73133	0.254367	-18.6004	3.18668e-77	1.84664e-74	68	86	98	36	26	20	1357	2290	2807	0h>24h
Igfbp7	787.539	3.98116	0.214321	18.5756	5.05921e-77	2.85845e-74	1313	1609	1711	2164	2434	2126	70	92	118	24h>0h
Col15a1	450.04	3.85561	0.2116	18.2213	3.49954e-74	1.92902e-71	772	869	995	917	1068	920	55	57	60	24h>0h
Egr2	767.674	-3.5866	0.199843	-17.9471	5.05727e-72	2.72129e-69	125	139	104	93	112	86	1087	1549	1602	0h>24h
Pcdh1	1655.05	-4.48164	0.250896	-17.8625	2.31036e-71	1.21428e-68	179	148	116	88	101	77	2008	3598	3966	0h>24h
Ndrg4	4782.75	2.29266	0.128917	17.784	9.40622e-71	4.83138e-68	8836	7787	8257	7297	9430	7375	1305	1767	1762	24h>0h
Tmem132e	2521.63	-3.72194	0.209859	-17.7354	2.2347e-70	1.12231e-67	385	337	392	186	273	210	3093	4917	6114	0h>24h
Tmc6	1688.34	-3.39457	0.192573	-17.6275	1.51523e-69	7.44437e-67	300	311	306	113	158	94	2120	3375	3780	0h>24h
Col5a2	1252.28	3.09767	0.17834	17.3694	1.40625e-67	6.76195e-65	2176	2201	2655	4066	4382	3795	192	276	316	24h>0h
Col13a1	1308.97	-4.49831	0.264367	-17.0154	6.31652e-65	2.97403e-62	107	119	121	109	143	87	1386	3195	3049	0h>24h
Adgrl2	2836.85	-2.32798	0.137002	-16.9924	9.35631e-65	4.31536e-62	1005	946	999	852	893	879	4264	5261	4486	0h>24h
Oasl2	613.163	2.69466	0.158782	16.9708	1.35128e-64	6.10779e-62	1158	1019	1153	709	835	818	132	188	169	24h>0h
Igdcc3	660.911	-2.95767	0.174926	-16.9081	3.91867e-64	1.73651e-61	151	169	151	71	107	87	916	1293	1289	0h>24h
Adam33	271.954	-3.88652	0.230207	-16.8827	6.02986e-64	2.62067e-61	40	32	36	37	43	28	399	599	525	0h>24h
Exoc3l	426.322	-3.60059	0.214567	-16.7807	3.37767e-63	1.44029e-60	71	55	78	26	41	33	590	831	937	0h>24h
Plvap	580.374	-5.20045	0.310554	-16.7457	6.08653e-63	2.54733e-60	41	33	22	15	26	14	695	1200	1521	0h>24h
Pip4k2a	666.381	-2.87493	0.171858	-16.7285	8.12423e-63	3.33832e-60	159	157	185	269	320	259	1065	1317	1090	0h>24h
Sost	322.084	-5.35876	0.320846	-16.7019	1.26853e-62	5.11944e-60	16	16	16	2	25	4	405	669	823	0h>24h
Col1a2	7368.38	3.13958	0.189444	16.5726	1.10031e-61	4.36262e-59	12753	14045	14596	19279	20652	18324	1500	1275	1629	24h>0h
Pdzd2	713.723	-3.15675	0.190495	-16.5713	1.12376e-61	4.37877e-59	161	150	139	217	241	215	1170	1498	1132	0h>24h
Sept6	1455.15	-2.24353	0.13579	-16.522	2.54752e-61	9.75828e-59	532	498	560	309	343	346	1923	2698	2549	0h>24h
Krt19	514.072	-4.6488	0.28242	-16.4606	7.04359e-61	2.65308e-58	29	34	61	15	15	17	711	1034	1221	0h>24h
Nid1	3993.98	-2.25788	0.137331	-16.4412	9.70221e-61	3.59459e-58	1408	1409	1507	1388	1490	1473	5727	7624	6272	0h>24h
Smoc2	912.291	-2.41197	0.14675	-16.4359	1.05828e-60	3.83814e-58	282	291	331	270	356	316	1327	1606	1625	0h>24h
Kcnc2	352.017	-5.48045	0.333457	-16.4352	1.06992e-60	3.83814e-58	17	22	9	16	11	7	721	715	579	0h>24h
Barhl2	486.856	-3.69471	0.22532	-16.3976	1.9906e-60	7.0293e-58	86	62	71	59	60	43	638	977	1100	0h>24h
Med14	2435.57	-3.82433	0.233605	-16.371	3.08298e-60	1.07193e-57	331	342	331	616	664	661	5042	4771	3443	0h>24h
Klhl36	327.774	-3.75302	0.230696	-16.2683	1.65768e-59	5.67631e-57	49	42	51	43	27	32	440	659	732	0h>24h
Egr3	304.463	-5.77941	0.358842	-16.1057	2.32602e-58	7.84597e-56	10	15	9	25	5	12	374	785	652	0h>24h
Sall1	1633.98	-2.5362	0.158638	-15.9873	1.56698e-57	5.2079e-55	502	537	461	646	853	734	2404	3139	2736	0h>24h
Sh2b3	3884.87	-2.58185	0.162601	-15.8784	8.93627e-57	2.92695e-54	1244	1130	1105	1051	1338	1171	4943	7171	7828	0h>24h
Ltbp4	232.975	3.98804	0.251286	15.8705	1.0136e-56	3.27249e-54	410	478	482	213	256	189	24	29	29	24h>0h
Lonrf3	2242.16	2.00106	0.127071	15.7475	7.13995e-56	2.27271e-53	3851	3439	3957	4427	5489	4860	794	966	897	24h>0h
Rasl11a	413.674	-3.06598	0.195992	-15.6434	3.68713e-55	1.15735e-52	92	81	104	68	83	79	558	800	854	0h>24h
Rec8	1265.94	2.30669	0.148187	15.5661	1.23806e-54	3.83291e-52	2393	2050	2154	1220	1510	1207	340	489	441	24h>0h
Col4a1	3492.32	2.54058	0.163851	15.5055	3.18651e-54	9.73176e-52	5577	5836	7280	6330	7141	5491	837	1031	1181	24h>0h
Ablim1	230.482	-3.5165	0.226839	-15.5022	3.35473e-54	1.01089e-51	41	38	37	59	54	63	333	469	464	0h>24h
Trf	315.712	-4.83562	0.312221	-15.4878	4.19108e-54	1.2463e-51	17	22	28	15	20	21	373	784	692	0h>24h
Scd1	1210.57	-2.34811	0.153694	-15.2779	1.07422e-52	3.15292e-50	371	428	444	287	339	309	1791	2096	2108	0h>24h
Prss35	386.1	6.14771	0.403088	15.2515	1.60852e-52	4.66057e-50	551	706	1139	1289	1132	1217	9	17	6	24h>0h
Clcf1	353.762	-3.5166	0.230856	-15.2329	2.14013e-52	6.1224e-50	49	62	67	57	47	36	480	813	660	0h>24h
Scn5a	1139.84	2.54674	0.167321	15.2207	2.57566e-52	7.27624e-50	2276	1951	1863	2323	3043	2266	266	390	338	24h>0h
Tagln	588.907	3.50825	0.23072	15.2056	3.24557e-52	9.05554e-50	951	1019	1430	1937	1815	1806	95	86	99	24h>0h
Slc9a3r1	2266.36	-3.01048	0.19838	-15.1753	5.15163e-52	1.41984e-49	540	487	541	466	552	418	2757	4162	5206	0h>24h
Bhlhe41	1603.71	-2.60112	0.171505	-15.1664	5.89885e-52	1.60619e-49	467	495	456	406	525	400	2027	3018	3208	0h>24h
Cyp51	2992.45	-2.0292	0.133963	-15.1474	7.87887e-52	2.11979e-49	1233	1178	1277	1121	1391	1168	4101	4779	5389	0h>24h
Col1a1	12054.2	2.82759	0.187472	15.0828	2.10239e-51	5.58989e-49	22166	23060	20763	28484	32557	25728	2595	2580	3637	24h>0h
Ephb1	866.695	-2.37425	0.157443	-15.0801	2.1881e-51	5.75013e-49	297	277	304	111	156	155	1168	1476	1686	0h>24h
Rasgrp2	1193.63	-2.51435	0.166743	-15.0792	2.21999e-51	5.76686e-49	366	367	380	208	291	232	1496	2222	2371	0h>24h
Mapk11	358.221	-3.04574	0.20219	-15.0637	2.80593e-51	7.20613e-49	95	65	83	42	47	42	504	726	679	0h>24h
Slc38a4	1603.15	-2.06341	0.137402	-15.0173	5.65441e-51	1.43584e-48	617	630	691	391	493	396	2341	2691	2622	0h>24h
Enc1	1727.67	-2.17569	0.145457	-14.9576	1.38977e-50	3.48987e-48	690	663	604	1315	1683	1344	2374	3005	3033	0h>24h
Ltbp2	915.76	2.62635	0.175883	14.9324	2.0292e-50	4.98478e-48	1723	1675	1526	2685	3040	2856	242	281	231	24h>0h
Rbm24	338.545	-2.72693	0.182611	-14.933	2.01017e-50	4.98478e-48	89	94	95	61	55	55	500	607	640	0h>24h
2900026A02Rik	2337.93	-2.15511	0.144376	-14.9271	2.19461e-50	5.33313e-48	961	874	847	712	983	741	3017	4267	4118	0h>24h
F2rl1	277.207	-3.04656	0.204558	-14.8934	3.63993e-50	8.75132e-48	62	68	57	52	37	41	423	542	504	0h>24h
Pla2g7	488.236	-2.81906	0.18936	-14.8873	3.98516e-50	9.48048e-48	130	112	138	208	248	256	798	791	933	0h>24h
Gpr4	201.21	-3.71759	0.25015	-14.8615	5.8627e-50	1.38018e-47	23	31	35	16	21	27	321	416	374	0h>24h
Ptpn13	3843	-2.01791	0.136174	-14.8186	1.11031e-49	2.58691e-47	1636	1415	1724	1706	2034	1598	5181	7127	6037	0h>24h
Glis3	3815.03	-2.96426	0.200969	-14.7498	3.08426e-49	7.11268e-47	1017	912	778	928	1200	959	6476	7813	5664	0h>24h
Spred3	219.676	-3.49612	0.237378	-14.7281	4.25605e-49	9.71583e-47	32	39	41	47	35	32	310	453	444	0h>24h
Gprc5a	246.769	-3.69353	0.250865	-14.7232	4.57614e-49	1.03421e-46	27	37	47	18	25	26	356	502	511	0h>24h
Kcnt1	385.888	2.78928	0.191759	14.5458	6.21375e-48	1.3904e-45	780	655	676	471	442	460	89	110	90	24h>0h
Zmym3	6188.05	1.90542	0.131314	14.5104	1.04162e-47	2.30789e-45	11036	9511	10048	6132	8020	6825	2148	2734	2879	24h>0h
Col4a2	2081.12	2.50323	0.172784	14.4876	1.45179e-47	3.18549e-45	3299	3346	4463	3899	4427	3344	530	619	704	24h>0h
Aldh1a3	306.113	-3.19122	0.220333	-14.4836	1.53814e-47	3.34249e-45	69	64	56	39	46	27	406	613	635	0h>24h
Hcn4	232.703	3.59268	0.248442	14.4609	2.14103e-47	4.60832e-45	531	409	406	181	214	139	29	39	38	24h>0h
Cdh4	430.959	-2.6461	0.18321	-14.443	2.77643e-47	5.91956e-45	141	112	119	62	63	51	618	753	839	0h>24h
Pramef12	1844.22	1.79988	0.124765	14.4261	3.54421e-47	7.48589e-45	2997	2829	3151	2782	3562	3209	690	875	882	24h>0h
Usp46	839.088	-2.09411	0.146267	-14.317	1.71279e-46	3.58416e-44	351	316	330	315	312	336	1210	1481	1338	0h>24h
Gfra3	192.206	3.83454	0.270651	14.1678	1.44878e-45	3.0039e-43	385	377	360	175	201	217	29	23	22	24h>0h
Cyp11a1	202.43	5.43363	0.383901	14.1537	1.77097e-45	3.63854e-43	317	449	470	340	263	290	11	11	5	24h>0h
Amot	1944.78	-3.30472	0.233574	-14.1485	1.90732e-45	3.88337e-43	394	389	333	301	445	369	3586	4178	2614	0h>24h
Tgm2	297.679	3.36825	0.238495	14.1229	2.74327e-45	5.53552e-43	540	490	676	448	549	396	38	51	68	24h>0h
Zswim5	1985.31	1.85346	0.131619	14.082	4.90085e-45	9.80171e-43	3332	3229	3165	3406	4220	3668	726	914	918	24h>0h
Trib1	813.713	-2.24925	0.159771	-14.0779	5.18969e-45	1.02883e-42	277	298	310	266	341	276	1067	1414	1530	0h>24h
8430419L09Rik	1994.54	-2.12905	0.151753	-14.0297	1.02579e-44	2.0159e-42	805	776	740	422	534	384	2504	3522	3679	0h>24h
Cdh3	1446.14	-2.53175	0.180514	-14.0253	1.09222e-44	2.12795e-42	458	419	459	304	401	313	1734	2676	2998	0h>24h
Sparc	3266.24	2.68905	0.192273	13.9856	1.90901e-44	3.68748e-42	5074	5629	7030	8800	8794	8695	802	780	1007	24h>0h
Phlda1	277.552	-3.7763	0.27121	-13.9239	4.53726e-44	8.69001e-42	47	41	30	35	49	44	365	537	651	0h>24h
Spon1	369.267	-2.85648	0.206173	-13.8548	1.18997e-43	2.25993e-41	100	83	98	46	53	63	516	626	792	0h>24h
Actn2	1002.9	-2.56395	0.185377	-13.831	1.65762e-43	3.12186e-41	321	303	283	220	315	242	1612	1975	1481	0h>24h
Cd93	143.953	-3.96928	0.287497	-13.8063	2.33409e-43	4.35955e-41	17	21	16	47	34	32	227	303	275	0h>24h
Hs3st3a1	210.26	-3.73034	0.272612	-13.6837	1.2709e-42	2.35429e-40	36	32	24	25	34	38	386	355	407	0h>24h
Epas1	1007.82	-2.40504	0.17594	-13.6697	1.54117e-42	2.83174e-40	393	299	311	261	367	306	1451	1981	1609	0h>24h
Arhgap26	1801.26	-2.09895	0.153627	-13.6626	1.69782e-42	3.09442e-40	783	673	678	688	772	580	2691	3177	2766	0h>24h
Rspo2	667.141	-2.01696	0.148014	-13.6269	2.77244e-42	5.01256e-40	289	246	294	194	250	164	927	1162	1087	0h>24h
Prickle1	791.058	-2.29045	0.168308	-13.6087	3.55502e-42	6.37646e-40	286	290	263	328	370	339	1121	1282	1495	0h>24h
Tdrd6	218.217	-3.09254	0.227607	-13.5872	4.77144e-42	8.4909e-40	44	53	46	26	36	21	362	389	402	0h>24h
Foxa2	274.936	-3.68891	0.27248	-13.5383	9.2946e-42	1.64108e-39	52	36	36	18	19	22	388	469	667	0h>24h
Bcl3	223.064	2.94515	0.21817	13.4993	1.5787e-41	2.76578e-39	435	390	412	135	211	147	38	54	61	24h>0h
Elfn1	350.153	-3.41143	0.252825	-13.4932	1.71398e-41	2.97969e-39	47	57	85	39	46	47	467	773	682	0h>24h
Sox13	2154.24	-2.1677	0.160782	-13.4823	1.98886e-41	3.43116e-39	883	785	787	748	959	714	2633	3826	4094	0h>24h
Rimbp2	574.736	-2.5533	0.189697	-13.4599	2.69335e-41	4.61134e-39	213	158	153	67	70	88	806	1064	1055	0h>24h
Cxcr4	451.449	-2.7148	0.201745	-13.4566	2.81568e-41	4.78454e-39	113	106	156	103	110	102	655	777	897	0h>24h
Id4	417.344	-2.50547	0.186341	-13.4456	3.26632e-41	5.50887e-39	143	127	121	242	286	223	610	690	805	0h>24h
Sox2	264.169	-4.04542	0.301045	-13.4379	3.62531e-41	6.06903e-39	26	41	27	23	24	22	328	534	639	0h>24h
Ptprb	407.854	-2.88939	0.215295	-13.4206	4.58192e-41	7.61407e-39	125	73	107	153	169	158	641	728	759	0h>24h
Arhgap31	1140.76	-2.23789	0.166873	-13.4107	5.2346e-41	8.63518e-39	424	395	431	352	441	354	1589	2311	1705	0h>24h
Prss23	178.478	3.13361	0.23405	13.3887	7.04361e-41	1.15352e-38	332	321	350	461	458	507	35	36	37	24h>0h
Ace	1431.3	-2.4235	0.181063	-13.3848	7.41573e-41	1.20572e-38	489	442	478	204	251	202	1692	2628	2930	0h>24h
Adm	463.658	-3.09296	0.23109	-13.3842	7.47759e-41	1.2071e-38	84	85	137	42	45	41	625	908	952	0h>24h
Fgf9	319.786	-2.81008	0.210539	-13.3471	1.23183e-40	1.97442e-38	88	63	100	53	63	66	484	637	542	0h>24h
Slc15a1	126.571	-5.34491	0.401036	-13.3278	1.5958e-40	2.53979e-38	5	8	6	5	1	4	227	257	246	0h>24h
Col12a1	1293.06	2.92569	0.219947	13.3018	2.26067e-40	3.5728e-38	2403	2577	2147	4035	4669	4365	329	291	258	24h>0h
Scd2	5404.49	-2.02287	0.152203	-13.2906	2.62559e-40	4.12071e-38	1987	2128	2576	1693	2074	2006	7045	9175	9624	0h>24h
Bhlhe40	1975.13	-2.27588	0.17155	-13.2666	3.61733e-40	5.63805e-38	600	716	800	244	307	279	2899	3184	3610	0h>24h
Vsx1	153.313	-4.67934	0.353869	-13.2234	6.43167e-40	9.95587e-38	17	13	6	8	10	12	213	346	327	0h>24h
Inha	235.975	4.97399	0.376622	13.2069	8.00985e-40	1.23145e-37	360	373	710	442	498	387	15	17	11	24h>0h
Gprc5c	389.523	-3.18119	0.240949	-13.2027	8.46034e-40	1.29192e-37	64	87	91	39	30	25	494	738	875	0h>24h
Gpd1l	916.239	-1.99856	0.151655	-13.1783	1.16961e-39	1.77404e-37	366	344	441	300	305	265	1215	1566	1581	0h>24h
Tmem132c	546.745	-2.51605	0.192941	-13.0405	7.20099e-39	1.08495e-36	192	154	164	118	155	109	685	996	1108	0h>24h
Themis2	225.85	2.64315	0.202843	13.0305	8.20153e-39	1.22751e-36	409	402	407	366	501	360	54	65	66	24h>0h
9930012K11Rik	210.63	-3.97233	0.305674	-12.9953	1.30084e-38	1.93414e-36	33	25	21	18	23	20	258	423	513	0h>24h
Gsta4	1069.77	-2.45151	0.188721	-12.9901	1.39238e-38	2.05672e-36	350	280	410	326	349	335	1386	1854	2166	0h>24h
Erbb3	2297.76	-1.61797	0.125131	-12.9302	3.04044e-38	4.46195e-36	1239	1119	1178	910	1255	886	2935	3653	3712	0h>24h
Abr	5203.67	-1.58434	0.122561	-12.9269	3.17265e-38	4.62592e-36	2873	2589	2686	2158	2739	2214	6671	8162	8343	0h>24h
Aldh1a1	209.147	4.70989	0.364936	12.9061	4.161e-38	6.02812e-36	280	408	577	746	694	663	11	19	16	24h>0h
Id2	170.035	4.36663	0.339086	12.8777	6.01267e-38	8.65519e-36	311	318	387	1073	1284	1137	21	17	8	24h>0h
Hdac7	2677.96	-2.60397	0.202697	-12.8467	8.98093e-38	1.28461e-35	866	828	667	364	541	389	3223	5086	5514	0h>24h
Arhgef15	583.354	-2.05001	0.159846	-12.8249	1.18935e-37	1.69052e-35	246	223	242	181	235	230	744	995	1065	0h>24h
Mt1	4308.12	-2.26953	0.177639	-12.7761	2.23072e-37	3.15089e-35	1397	1649	1577	1757	2322	2077	5476	8979	6921	0h>24h
Fev	181.678	-5.07265	0.399164	-12.7082	5.32583e-37	7.47601e-35	16	6	11	11	15	7	200	417	455	0h>24h
Rab11fip4	7755.44	2.27059	0.179048	12.6814	7.49339e-37	1.04537e-34	14648	12081	13550	12246	16620	11629	1832	2984	3194	24h>0h
Zbp1	191.424	3.06492	0.242007	12.6646	9.29127e-37	1.28824e-34	359	316	398	90	115	107	37	35	49	24h>0h
Sp5	664.614	-3.16823	0.250236	-12.6609	9.73159e-37	1.34106e-34	158	126	133	81	101	82	780	1166	1657	0h>24h
Bmp1	411.571	2.1408	0.169375	12.6394	1.27966e-36	1.75085e-34	698	664	740	750	808	797	128	151	173	24h>0h
Phf19	253.111	-3.23212	0.255725	-12.639	1.28602e-36	1.75085e-34	60	40	53	30	34	18	315	492	569	0h>24h
Ier3	932.009	-2.67168	0.211648	-12.6232	1.57274e-36	2.12838e-34	217	242	335	124	155	138	1175	1775	1882	0h>24h
Lat	454.003	-2.48799	0.197877	-12.5735	2.95484e-36	3.97497e-34	133	132	166	84	116	83	568	823	918	0h>24h
Lrig3	721.066	-2.0407	0.162775	-12.5369	4.68796e-36	6.26911e-34	291	259	335	303	346	283	977	1161	1309	0h>24h
Cyp26b1	197.016	3.27389	0.261996	12.496	7.85468e-36	1.04421e-33	373	387	355	323	483	324	35	28	46	24h>0h
Olfm1	828.19	-2.33222	0.186831	-12.4831	9.2357e-36	1.22062e-33	313	273	273	108	121	95	1114	1301	1699	0h>24h
Wif1	114.557	-4.16511	0.335712	-12.4068	2.40061e-35	3.15428e-33	11	10	17	14	9	17	166	231	252	0h>24h
Nid2	9122.84	-1.69245	0.136488	-12.4	2.61421e-35	3.41509e-33	4798	4357	4335	3031	3889	2938	10989	15214	15399	0h>24h
Podxl	1603.12	-1.94832	0.157342	-12.3828	3.24044e-35	4.20885e-33	794	592	684	600	841	658	2076	2695	2814	0h>24h
Ccdc88b	135.283	3.46617	0.280001	12.3791	3.38969e-35	4.37755e-33	289	234	255	128	158	110	16	24	27	24h>0h
Ptpn9	532.107	-2.16957	0.17534	-12.3735	3.63426e-35	4.66671e-33	191	223	190	256	324	281	740	911	935	0h>24h
Kdr	278.025	-2.37239	0.191761	-12.3716	3.72246e-35	4.75297e-33	93	88	101	40	73	39	399	460	524	0h>24h
Nr5a2	400.253	-2.62007	0.212063	-12.3551	4.57036e-35	5.80282e-33	112	109	130	100	106	126	626	837	577	0h>24h
Letmd1	172.448	2.99172	0.242166	12.354	4.6342e-35	5.851e-33	346	310	303	320	448	359	28	42	45	24h>0h
Lonp2	2083.28	-1.67726	0.136218	-12.3131	7.70304e-35	9.6716e-33	999	982	1129	861	989	1051	2585	3326	3543	0h>24h
Plk3	683.597	-2.0828	0.169197	-12.3099	8.01206e-35	1.0004e-32	294	277	245	129	203	143	905	1152	1236	0h>24h
Pdgfa	2297.45	-1.55834	0.126775	-12.2922	9.98008e-35	1.23928e-32	1214	1172	1261	701	1011	845	2790	3677	3753	0h>24h
Rxrg	131.372	-4.25147	0.346735	-12.2615	1.45848e-34	1.80118e-32	7	17	17	12	9	10	182	290	277	0h>24h
Hebp1	195.402	-2.69138	0.219799	-12.2447	1.79335e-34	2.2027e-32	59	54	51	32	33	36	271	393	346	0h>24h
Sphk1	907.348	-2.73449	0.224486	-12.1811	3.91905e-34	4.78759e-32	232	236	275	138	117	133	1030	1642	2083	0h>24h
Eef2k	2016.96	1.9666	0.161744	12.1587	5.15484e-34	6.26341e-32	3460	3127	3479	2754	3650	2678	586	967	915	24h>0h
Kcna1	273.078	-3.04182	0.250419	-12.1469	5.95896e-34	7.20174e-32	66	61	58	23	37	25	429	628	390	0h>24h
Pear1	1661.31	-2.21672	0.182644	-12.1368	6.7379e-34	8.05696e-32	642	663	530	533	762	580	2075	2981	3125	0h>24h
Zic4	125.704	-4.99971	0.41194	-12.137	6.72764e-34	8.05696e-32	13	2	9	17	2	6	197	232	297	0h>24h
Cmtm8	189.414	-3.25079	0.268049	-12.1276	7.54325e-34	8.9725e-32	51	30	32	19	27	8	258	398	371	0h>24h
Igsf21	600.005	-2.77281	0.228797	-12.1191	8.37002e-34	9.9038e-32	191	118	173	31	57	44	767	1058	1311	0h>24h
Nrros	287.173	-2.66597	0.2201	-12.1125	9.06509e-34	1.06704e-31	86	62	98	53	71	77	374	560	552	0h>24h
Plaur	241.805	-2.81941	0.233108	-12.0949	1.12403e-33	1.31623e-31	52	64	72	22	50	36	307	478	486	0h>24h
Egr1	1876.32	-2.153	0.178406	-12.068	1.5586e-33	1.81569e-31	751	710	694	855	1149	877	2135	3698	3387	0h>24h
Msmo1	1280.92	-2.15673	0.178955	-12.0518	1.89849e-33	2.2003e-31	464	502	501	458	580	581	2099	2149	1896	0h>24h
Vstm2l	206.973	-4.15394	0.345321	-12.0292	2.4953e-33	2.87723e-31	15	24	30	7	16	5	256	368	556	0h>24h
Ptpn3	1975.87	-1.58944	0.132395	-12.0053	3.33078e-33	3.8211e-31	1122	946	1020	817	941	835	2537	3244	3031	0h>24h
Tbxa2r	312.55	-3.76669	0.313957	-11.9975	3.66289e-33	4.18088e-31	52	42	40	58	50	62	315	655	801	0h>24h
Slc7a7	232.317	-2.49646	0.208558	-11.9701	5.09662e-33	5.78812e-31	84	69	66	55	88	64	319	446	412	0h>24h
Kcna6	102.834	-3.99497	0.334639	-11.9381	7.48751e-33	8.46089e-31	15	11	12	10	19	8	183	207	181	0h>24h
Ankrd37	376.706	-2.24986	0.188588	-11.93	8.2555e-33	9.28231e-31	151	114	146	67	88	95	487	660	712	0h>24h
Gjb2	253.913	-2.43777	0.205196	-11.8802	1.49974e-32	1.67792e-30	83	75	90	66	72	77	387	492	391	0h>24h
Nkx1-1	131.72	4.04452	0.344209	11.7502	7.04489e-32	7.84308e-30	241	256	281	398	486	389	9	11	25	24h>0h
Lipg	122.002	-3.6108	0.308866	-11.6905	1.42514e-31	1.57883e-29	17	16	25	12	6	14	169	232	274	0h>24h
Epcam	3677.94	-1.62997	0.139752	-11.6634	1.96166e-31	2.16262e-29	1877	1693	2065	1680	2317	1724	4378	5938	6280	0h>24h
Notch1	2568.01	-2.201	0.189799	-11.5965	4.29224e-31	4.70896e-29	1132	930	806	675	851	631	3232	4492	4888	0h>24h
Nrd1	1686.35	-1.83922	0.159178	-11.5545	7.00197e-31	7.64466e-29	751	726	831	773	843	800	2564	2750	2445	0h>24h
Wdr91	1317.84	1.81763	0.15745	11.5441	7.90315e-31	8.58708e-29	2317	2027	2085	1362	1679	1349	444	622	675	24h>0h
Myo7a	202.14	2.92853	0.254077	11.5262	9.73893e-31	1.05311e-28	339	366	415	638	680	580	31	65	45	24h>0h
Cplx2	143.139	-3.2587	0.282748	-11.5251	9.86206e-31	1.06135e-28	27	26	32	26	25	36	176	312	293	0h>24h
Lhfpl2	539.501	-1.85587	0.16105	-11.5236	1.00347e-30	1.07481e-28	231	254	245	423	446	446	747	918	841	0h>24h
Sqle	2561.59	-1.49402	0.129951	-11.4968	1.36867e-30	1.45906e-28	1404	1324	1477	1402	1675	1442	3287	3783	4140	0h>24h
Cdcp1	167.354	-2.86638	0.249577	-11.4849	1.57052e-30	1.66638e-28	41	46	39	20	25	24	284	315	268	0h>24h
Adrb1	103.867	-4.09721	0.356862	-11.4812	1.63921e-30	1.73113e-28	12	10	14	5	7	8	143	194	251	0h>24h
Acss1	469.556	-2.1097	0.184169	-11.4552	2.21403e-30	2.32731e-28	182	184	187	102	126	80	555	857	875	0h>24h
Phldb2	277.037	3.44347	0.30079	11.4481	2.40396e-30	2.51526e-28	424	545	618	730	677	754	56	49	31	24h>0h
Pecam1	174.252	-2.56096	0.224173	-11.424	3.17176e-30	3.30331e-28	54	51	53	58	61	66	278	317	285	0h>24h
Draxin	135.397	3.23801	0.283942	11.4037	4.00524e-30	4.15222e-28	265	271	228	326	370	327	22	23	32	24h>0h
Pdgfb	3063.49	-2.26375	0.199258	-11.3609	6.54566e-30	6.75489e-28	1187	1024	1097	607	751	572	3391	5390	6489	0h>24h
Col6a3	1164.32	1.96666	0.173214	11.3539	7.09178e-30	7.28519e-28	1889	2051	1848	1817	2249	1774	463	460	473	24h>0h
Hlx	225.665	-3.80082	0.334875	-11.35	7.41987e-30	7.58774e-28	31	41	22	15	33	42	267	417	586	0h>24h
Emilin1	355.578	2.29934	0.202624	11.3478	7.60345e-30	7.74045e-28	598	586	669	521	582	408	83	128	149	24h>0h
Tanc1	3929.9	-1.48632	0.131204	-11.3283	9.50468e-30	9.63254e-28	2274	2114	2079	2254	2787	2295	5183	6117	5851	0h>24h
Mmp2	936.682	1.84482	0.162872	11.3268	9.6692e-30	9.75553e-28	1454	1502	1632	2117	2462	2353	323	408	485	24h>0h
Sfrp2	980.086	-1.76133	0.155674	-11.3142	1.11585e-29	1.12081e-27	451	444	504	791	915	770	1210	1541	1761	0h>24h
Tgif1	272.036	-2.20391	0.194977	-11.3034	1.26201e-29	1.26201e-27	93	111	99	63	74	87	393	473	459	0h>24h
Osbpl6	311.228	-2.15915	0.191598	-11.2691	1.86388e-29	1.85358e-27	134	104	119	143	175	148	444	585	481	0h>24h
Foxf1	594.801	-2.56971	0.228037	-11.2688	1.86999e-29	1.85358e-27	214	153	171	99	152	111	695	1063	1304	0h>24h
Miat	112.687	-4.26127	0.378636	-11.2543	2.20677e-29	2.17786e-27	8	13	14	11	9	4	138	289	221	0h>24h
Sohlh1	2769.61	2.08568	0.185807	11.2249	3.0764e-29	3.0229e-27	5029	3943	5111	4190	5360	3892	744	1128	1299	24h>0h
Wisp1	142.879	4.3735	0.389859	11.2182	3.32051e-29	3.24863e-27	248	297	306	343	283	375	21	10	7	24h>0h
Dpysl2	1176.32	-1.56623	0.139699	-11.2114	3.58296e-29	3.4903e-27	640	543	681	384	498	374	1457	1934	1845	0h>24h
Shisa8	124.486	3.18598	0.284184	11.211	3.60128e-29	3.49309e-27	226	240	235	84	159	109	22	20	31	24h>0h
Loxl1	253.074	2.17971	0.194712	11.1945	4.33756e-29	4.18927e-27	433	426	438	510	551	527	82	87	102	24h>0h
Acacb	1461.57	-1.73026	0.155441	-11.1313	8.83131e-29	8.49309e-27	806	630	686	396	518	352	1856	2312	2515	0h>24h
St8sia1	110.283	-6.41443	0.576732	-11.122	9.8013e-29	9.38599e-27	5	2	1	2	0	1	205	252	187	0h>24h
Gstm2	127.721	4.57555	0.411986	11.1061	1.1721e-28	1.1177e-26	205	210	358	1035	1072	1050	4	12	15	24h>0h
Ephb3	794.652	-2.35333	0.212221	-11.0891	1.41732e-28	1.34586e-26	283	244	289	254	323	248	867	1470	1672	0h>24h
B4gat1	359.073	-2.66832	0.24066	-11.0875	1.44205e-28	1.36361e-26	111	80	116	138	126	127	439	615	808	0h>24h
Hmgcr	4975.83	-1.38229	0.124931	-11.0644	1.86606e-28	1.75721e-26	2873	2783	2982	2920	3713	3046	6516	7328	7427	0h>24h
Fbn1	1020.2	2.03229	0.184432	11.0192	3.08932e-28	2.89704e-26	1666	1649	1818	2055	2229	2230	419	388	367	24h>0h
Prkcb	800.063	-2.06514	0.187632	-11.0063	3.56219e-28	3.32667e-26	359	268	342	192	160	206	1202	1485	1131	0h>24h
Chrna4	784.944	-2.03258	0.184938	-10.9906	4.24234e-28	3.94555e-26	348	345	269	177	263	197	1023	1354	1382	0h>24h
St14	349.279	-2.99707	0.272769	-10.9876	4.38386e-28	4.06046e-26	98	69	77	44	42	41	375	685	819	0h>24h
Tgfb1	1119.96	-2.23961	0.203892	-10.9843	4.54809e-28	4.19538e-26	406	393	427	290	318	250	1209	2060	2306	0h>24h
Lmx1a	211.944	-2.79511	0.254873	-10.9667	5.52651e-28	5.0772e-26	57	43	68	45	46	39	253	437	426	0h>24h
Cyp2u1	367.415	-2.49316	0.227422	-10.9627	5.77697e-28	5.28581e-26	109	141	95	72	98	77	486	721	658	0h>24h
Hcn2	594.441	2.10351	0.192069	10.9519	6.50942e-28	5.93197e-26	1054	1046	911	766	1001	847	200	204	260	24h>0h
Mest	416.415	-2.44644	0.223438	-10.9491	6.71225e-28	6.09224e-26	136	156	110	140	148	129	689	702	678	0h>24h
Mcam	9441.14	-1.5656	0.143208	-10.9324	8.06926e-28	7.29461e-26	5098	4797	5032	3563	4756	3675	10587	15737	15945	0h>24h
Wfikkn2	157.159	-3.65364	0.335291	-10.8969	1.19205e-27	1.07332e-25	28	31	13	19	24	21	204	329	342	0h>24h
Lats2	2072.57	1.55667	0.142936	10.8906	1.27746e-27	1.14566e-25	3406	3053	3227	3556	4362	3735	986	1115	1004	24h>0h
Itgb2	84.9445	-4.22869	0.388673	-10.8798	1.4387e-27	1.28516e-25	12	7	8	2	8	6	116	175	193	0h>24h
En1	319.514	-2.69754	0.24795	-10.8794	1.44589e-27	1.2865e-25	91	91	85	71	121	55	367	566	734	0h>24h
Arhgef9	144.355	-2.94519	0.270807	-10.8756	1.50637e-27	1.33506e-25	34	30	40	33	43	52	252	281	219	0h>24h
Srgap3	453.526	-1.9086	0.175638	-10.8667	1.66178e-27	1.46704e-25	213	204	179	205	250	215	645	763	712	0h>24h
Ocln	960.106	-1.80726	0.166519	-10.8532	1.9263e-27	1.69394e-25	423	379	539	468	567	434	1282	1558	1594	0h>24h
Slc5a4a	86.173	-5.72149	0.529985	-10.7956	3.61153e-27	3.16359e-25	2	6	2	4	3	7	152	163	185	0h>24h
Olfml3	93.8061	3.85907	0.358548	10.763	5.14447e-27	4.48899e-25	161	200	187	232	232	226	10	17	9	24h>0h
Mn1	1061.14	-1.776	0.165112	-10.7563	5.53269e-27	4.80919e-25	510	482	510	237	343	235	1208	1787	1928	0h>24h
Blvrb	236.037	3.56035	0.331763	10.7316	7.23283e-27	6.26291e-25	511	341	519	212	237	205	21	30	60	24h>0h
Dusp7	2756.77	-1.68556	0.157115	-10.7282	7.50524e-27	6.47398e-25	1388	1286	1422	1125	1361	1091	3735	3857	4850	0h>24h
Slit2	138.074	2.73944	0.25537	10.7273	7.57541e-27	6.50966e-25	250	256	244	253	305	290	37	36	33	24h>0h
Acvrl1	314.948	-2.42783	0.226642	-10.7122	8.92642e-27	7.64156e-25	108	89	113	94	102	86	363	573	662	0h>24h
Ggt5	90.8726	-3.58149	0.335311	-10.6811	1.248e-26	1.06433e-24	16	12	16	5	9	11	122	180	201	0h>24h
Gata4	142.93	3.44684	0.322808	10.6777	1.29485e-26	1.10014e-24	252	245	324	325	382	351	31	23	16	24h>0h
Cyr61	573.747	2.22811	0.209034	10.6591	1.5818e-26	1.3389e-24	820	1072	1061	888	1083	899	186	183	227	24h>0h
Pdk1	2156.31	-1.68941	0.159285	-10.6062	2.78818e-26	2.35122e-24	1061	988	1150	591	801	682	3213	3458	3017	0h>24h
Rasa3	1902.63	-1.57483	0.14855	-10.6013	2.93725e-26	2.46772e-24	989	940	1068	660	940	747	2147	3160	3222	0h>24h
Ccno	105.227	3.29534	0.311177	10.5899	3.31854e-26	2.77774e-24	180	211	206	282	396	335	14	18	26	24h>0h
Tor3a	477.492	-1.85737	0.175588	-10.578	3.7684e-26	3.14265e-24	199	212	236	189	249	186	576	804	857	0h>24h
Gfpt2	1137.73	-1.53831	0.145622	-10.5638	4.3874e-26	3.64541e-24	644	593	586	372	470	419	1547	1726	1730	0h>24h
Bgn	1924.94	1.86042	0.176217	10.5576	4.68728e-26	3.88031e-24	2791	3422	3210	4784	5006	5665	748	782	928	24h>0h
Hunk	578.334	-1.87918	0.178162	-10.5475	5.21409e-26	4.30068e-24	274	237	264	177	212	172	677	963	1083	0h>24h
Zfp423	203.101	-2.26683	0.215026	-10.5421	5.52353e-26	4.53933e-24	68	69	82	57	48	44	283	328	388	0h>24h
Irs2	588.142	-1.682	0.161179	-10.4356	1.70552e-25	1.39655e-23	311	292	271	209	279	247	724	1000	950	0h>24h
Tmsb4x	711.228	2.55612	0.245278	10.4213	1.98154e-25	1.6167e-23	1052	1098	1673	1812	1826	2062	200	171	237	24h>0h
Tapbp	1468.15	2.10745	0.202396	10.4125	2.17442e-25	1.7677e-23	2567	2351	2548	925	1190	948	355	614	699	24h>0h
Igf2bp1	7192.36	-1.48759	0.143038	-10.4	2.47871e-25	2.00784e-23	4146	3908	3771	4006	5011	3924	8214	11612	11865	0h>24h
Abcc3	438.269	-2.2025	0.211991	-10.3896	2.76553e-25	2.23218e-23	196	149	145	116	152	129	542	739	873	0h>24h
2810459M11Rik	175.194	-2.45929	0.237233	-10.3665	3.52051e-25	2.83145e-23	57	53	59	32	29	25	222	302	363	0h>24h
Frmpd1	326.168	2.47777	0.239347	10.3522	4.09003e-25	3.27782e-23	669	553	508	497	676	519	76	89	131	24h>0h
Cyp1b1	104.21	3.20804	0.310421	10.3345	4.91992e-25	3.92898e-23	187	195	206	445	426	472	22	24	14	24h>0h
Arhgef5	344.74	-1.72332	0.167237	-10.3047	6.71293e-25	5.34198e-23	167	160	175	243	209	176	447	598	529	0h>24h
Cerk	754.776	-2.15754	0.209726	-10.2874	8.02793e-25	6.36601e-23	236	264	368	242	194	185	929	1334	1428	0h>24h
Sh3bp4	1598.55	-1.6197	0.157674	-10.2724	9.37935e-25	7.41165e-23	846	771	842	558	733	600	1862	2459	2884	0h>24h
Pqlc1	484.163	-1.96611	0.192097	-10.235	1.38239e-24	1.08858e-22	199	176	245	144	181	167	604	780	917	0h>24h
Cdk18	557.445	-1.70432	0.166765	-10.2199	1.61539e-24	1.26763e-22	268	277	274	139	143	145	653	934	964	0h>24h
Lhx8	133.635	3.42507	0.335479	10.2095	1.79817e-24	1.40618e-22	283	231	251	486	649	575	31	15	20	24h>0h
Kif3c	1600.92	-1.76409	0.172831	-10.207	1.84451e-24	1.43745e-22	825	655	806	629	798	608	1844	2581	2980	0h>24h
Gyltl1b	1519.92	-1.91232	0.187521	-10.1979	2.02602e-24	1.57347e-22	678	728	584	400	427	356	1793	2575	2823	0h>24h
Plb1	521.222	-1.66877	0.163717	-10.193	2.12982e-24	1.64842e-22	278	260	242	217	231	243	654	899	809	0h>24h
Mark1	583.267	-1.5325	0.15089	-10.1564	3.10339e-24	2.39374e-22	335	275	330	489	609	478	735	948	894	0h>24h
Smox	681.198	-2.06338	0.203469	-10.141	3.63367e-24	2.79323e-22	276	263	285	183	220	184	746	1176	1386	0h>24h
Hip1	3862.6	-1.38215	0.136354	-10.1365	3.80639e-24	2.91608e-22	2435	2155	2112	1500	1939	1691	4589	6170	5871	0h>24h
Rab4a	204.939	-2.28958	0.225885	-10.136	3.82273e-24	2.9187e-22	67	84	66	62	50	56	307	336	363	0h>24h
Rnf213	661.879	1.88856	0.186397	10.1319	3.98856e-24	3.03506e-22	1191	996	1078	1047	1001	1068	270	322	239	24h>0h
Cdh1	496.019	-1.84173	0.182268	-10.1045	5.2773e-24	4.00225e-22	217	239	220	124	120	123	658	743	901	0h>24h
Mmp9	661.942	-1.75496	0.173729	-10.1017	5.42828e-24	4.10298e-22	341	305	301	197	224	258	810	1022	1213	0h>24h
Capg	934.442	-2.0706	0.205338	-10.0839	6.50965e-24	4.90394e-22	354	339	435	324	319	230	1005	1720	1825	0h>24h
Lgals3bp	369.878	1.65813	0.164605	10.0734	7.24521e-24	5.43993e-22	573	576	609	533	643	603	155	183	190	24h>0h
Cadps2	474.282	1.63673	0.162771	10.0554	8.69314e-24	6.50547e-22	777	738	730	697	827	724	198	231	256	24h>0h
Tns2	1080.53	-2.37391	0.236492	-10.038	1.03746e-23	7.73818e-22	459	365	267	438	535	490	1360	1929	2133	0h>24h
Fam189a2	379.287	-2.08257	0.208122	-10.0065	1.4273e-23	1.06108e-21	170	140	144	114	138	119	434	669	740	0h>24h
Tbc1d8	512.082	-1.60076	0.160057	-10.0012	1.50589e-23	1.11584e-21	269	230	298	394	519	355	678	798	807	0h>24h
Msx2	167.485	-2.61973	0.263295	-9.94978	2.52729e-23	1.86656e-21	59	42	46	66	89	75	222	273	365	0h>24h
Sall2	252.527	-2.1786	0.219061	-9.9452	2.64649e-23	1.94823e-21	106	80	101	70	101	62	299	449	493	0h>24h
Fblim1	1017.81	-1.41059	0.142346	-9.90955	3.78334e-23	2.77609e-21	621	506	619	219	295	260	1243	1564	1591	0h>24h
Pappa	82.1517	3.85444	0.389164	9.90441	3.98308e-23	2.9038e-21	149	171	159	354	275	337	15	8	8	24h>0h
Sirpa	1024.04	-1.4941	0.150848	-9.90461	3.97507e-23	2.9038e-21	589	549	541	457	629	475	1174	1676	1667	0h>24h
Hbegf	431.812	-1.74971	0.177067	-9.88167	4.99942e-23	3.63302e-21	213	198	209	146	172	146	512	693	784	0h>24h
Inhba	75.1771	5.15831	0.522593	9.87061	5.58259e-23	4.0438e-21	149	162	145	286	207	222	7	5	0	24h>0h
Lins	244.096	-2.28197	0.231387	-9.86215	6.07361e-23	4.38542e-21	94	89	77	45	63	38	404	435	351	0h>24h
Jph4	141.249	-2.68031	0.272119	-9.84977	6.8703e-23	4.94486e-21	44	45	30	29	32	18	183	286	263	0h>24h
Isg15	119.777	2.87978	0.292749	9.83705	7.79629e-23	5.59353e-21	208	194	261	220	218	175	19	40	27	24h>0h
Pdgfrb	259.085	2.07934	0.211415	9.83535	7.92878e-23	5.67058e-21	409	409	496	455	546	501	80	93	122	24h>0h
Timp3	274.162	2.36684	0.240656	9.83496	7.96021e-23	5.6751e-21	423	508	503	507	498	682	96	93	72	24h>0h
Mb21d2	1319.5	-1.49351	0.152038	-9.82327	8.93995e-23	6.35355e-21	762	636	772	447	522	486	1594	1955	2247	0h>24h
Kcnj15	98.5976	-3.56925	0.363492	-9.81934	9.29488e-23	6.58509e-21	9	17	22	13	15	22	157	231	153	0h>24h
Gm807	94.4123	-3.17761	0.32412	-9.80381	1.08413e-22	7.65668e-21	14	17	28	11	23	17	152	191	161	0h>24h
Pitpnc1	795.467	-1.58328	0.161566	-9.79958	1.13059e-22	7.95993e-21	478	364	406	326	378	315	1070	1269	1193	0h>24h
Bmp4	133.034	-2.65903	0.271527	-9.79285	1.20836e-22	8.48105e-21	29	38	47	46	55	33	184	279	223	0h>24h
Gm38246	223.498	-2.61447	0.267176	-9.78557	1.29866e-22	9.0866e-21	46	60	91	149	183	146	358	379	397	0h>24h
Spsb4	123.981	-2.66142	0.27219	-9.77781	1.40205e-22	9.77974e-21	31	33	42	31	54	30	206	195	229	0h>24h
Cntn2	121.276	-2.74299	0.281474	-9.74508	1.93618e-22	1.34639e-20	34	29	36	24	23	10	143	257	236	0h>24h
Cd9	2465.06	-1.35499	0.139056	-9.74426	1.95199e-22	1.35044e-20	1387	1329	1630	1210	1563	1443	2969	3645	3923	0h>24h
Arntl	882.282	-1.58142	0.162294	-9.74416	1.95396e-22	1.35044e-20	435	447	502	335	454	361	1208	1495	1211	0h>24h
Fer1l6	176.261	-2.89012	0.296789	-9.73795	2.07712e-22	1.43118e-20	59	40	32	26	34	24	307	350	257	0h>24h
Sephs1	726.961	-1.38322	0.142193	-9.72778	2.29547e-22	1.57683e-20	412	404	446	527	614	527	872	1109	1146	0h>24h
Slx1b	276.922	1.90945	0.196353	9.72455	2.36959e-22	1.62281e-20	481	429	461	324	415	290	83	140	126	24h>0h
Hsd17b12	2575.8	-1.55673	0.16017	-9.71922	2.49684e-22	1.70479e-20	1320	1203	1580	999	1230	1179	3545	3662	4142	0h>24h
BC107364	67.5227	-3.71069	0.381899	-9.71643	2.5661e-22	1.7468e-20	10	11	9	17	10	9	92	137	147	0h>24h
Ankrd63	257.118	-2.52776	0.260247	-9.71291	2.65637e-22	1.80282e-20	73	93	71	25	42	32	294	466	559	0h>24h
Ncmap	229.527	-2.02778	0.208892	-9.70731	2.80633e-22	1.8989e-20	111	89	83	114	130	121	299	414	386	0h>24h
Slc2a1	5468	-1.70411	0.175663	-9.70106	2.98378e-22	2.01294e-20	2501	2452	3105	1234	1515	1324	6323	8427	10272	0h>24h
Rasgrf1	144.109	-2.4087	0.248318	-9.70008	3.01255e-22	2.0263e-20	52	43	48	35	30	23	237	259	218	0h>24h
Mtap7d3	106.36	-5.53387	0.570749	-9.69579	3.14186e-22	2.107e-20	1	7	6	11	11	16	283	154	156	0h>24h
Insig1	4770.59	-1.27288	0.131387	-9.68804	3.38984e-22	2.26658e-20	3117	2639	2999	2250	2990	2572	5803	6796	7425	0h>24h
Ppm1j	436.546	-2.42981	0.251638	-9.65597	4.63766e-22	3.09177e-20	147	127	155	66	81	89	430	904	901	0h>24h
Ifitm1	150.381	-2.23778	0.232356	-9.63084	5.92441e-22	3.93799e-20	62	49	54	21	36	33	193	290	259	0h>24h
Fam43a	679.833	-2.10209	0.21828	-9.63026	5.95808e-22	3.94876e-20	294	212	302	263	304	284	738	1245	1340	0h>24h
Atp1a2	78.218	-3.10483	0.32242	-9.62977	5.98654e-22	3.95602e-20	15	18	18	20	20	15	111	146	161	0h>24h
Chn2	358.828	-1.84906	0.192332	-9.61388	6.9868e-22	4.60355e-20	170	159	159	151	188	143	451	544	678	0h>24h
Iqgap3	810.051	1.44676	0.150681	9.60149	7.87975e-22	5.17681e-20	1299	1190	1220	652	794	735	404	460	421	24h>0h
Vsig10	705.317	-1.67217	0.174196	-9.59935	8.04504e-22	5.27008e-20	368	327	361	255	343	226	773	1215	1235	0h>24h
Nin	689.07	-2.08557	0.217451	-9.591	8.7236e-22	5.69807e-20	276	259	288	229	284	250	1122	1297	860	0h>24h
1500009L16Rik	458.515	-2.11858	0.22101	-9.58594	9.16224e-22	5.96734e-20	212	136	192	194	239	182	526	839	875	0h>24h
Fam160b1	815.08	-1.66601	0.173803	-9.5856	9.19183e-22	5.96941e-20	387	395	441	398	471	377	1198	1345	1109	0h>24h
Hmgcs1	4858.96	-1.56699	0.163616	-9.57724	9.96754e-22	6.45463e-20	2575	2416	2691	2484	3188	2745	7128	7867	6386	0h>24h
Pmaip1	450.067	-2.72589	0.284782	-9.57186	1.04999e-21	6.77994e-20	117	132	120	111	146	108	835	945	509	0h>24h
Pkdcc	456.312	-2.1679	0.226566	-9.5685	1.08467e-21	6.98389e-20	156	189	174	115	122	87	491	850	910	0h>24h
Lpar3	309.42	-1.88335	0.196951	-9.56255	1.14893e-21	7.37667e-20	122	154	136	191	255	177	396	515	539	0h>24h
Gadd45b	348.564	2.03409	0.21317	9.54209	1.39982e-21	8.96202e-20	604	465	695	404	571	361	99	158	153	24h>0h
Jam2	93.3292	3.68813	0.386909	9.53229	1.53847e-21	9.82186e-20	140	147	259	293	284	306	11	15	14	24h>0h
Tet3	2804.95	1.66372	0.174644	9.52638	1.62865e-21	1.03683e-19	5078	4318	3937	6381	8010	5650	1113	1621	1277	24h>0h
Cd7	74.2786	-4.48816	0.473639	-9.4759	2.64479e-21	1.67899e-19	10	2	8	13	7	9	87	176	168	0h>24h
Abhd12b	65.373	-5.47174	0.577558	-9.47392	2.69531e-21	1.70628e-19	3	4	2	2	2	2	120	158	100	0h>24h
Tmem255a	219.84	-3.64881	0.385322	-9.46951	2.81157e-21	1.7749e-19	19	31	52	9	14	9	473	435	274	0h>24h
Fetub	187.305	-2.15387	0.227578	-9.46433	2.95457e-21	1.85998e-19	59	74	82	58	84	85	283	301	319	0h>24h
Zfp365	278.589	-2.13817	0.226133	-9.45536	3.21915e-21	2.02091e-19	89	119	114	114	105	88	441	491	405	0h>24h
Arap3	917.17	-1.41655	0.149829	-9.45441	3.24851e-21	2.03369e-19	541	505	519	586	573	497	1031	1477	1481	0h>24h
Htra1	342.815	2.80863	0.297268	9.44814	3.44893e-21	2.1532e-19	495	580	809	520	488	518	71	62	121	24h>0h
Alx4	283.257	-1.91551	0.20341	-9.417	4.64155e-21	2.88978e-19	141	100	132	77	112	74	344	486	509	0h>24h
Cbr3	115.884	-3.66742	0.390139	-9.40029	5.44138e-21	3.37844e-19	20	17	16	14	18	19	109	242	304	0h>24h
Asb7	182.214	-2.1988	0.234127	-9.3915	5.91514e-21	3.66253e-19	79	62	63	36	36	39	288	325	269	0h>24h
Sept11	3042.68	-1.34926	0.143679	-9.39081	5.95387e-21	3.67643e-19	1687	1732	1953	1423	1833	1566	4048	4692	4172	0h>24h
Col4a4	58.6214	4.93812	0.525866	9.39046	5.97379e-21	3.67868e-19	105	123	127	56	61	44	3	3	5	24h>0h
Pld6	416.609	1.96043	0.209106	9.37531	6.89759e-21	4.23602e-19	680	686	709	675	828	607	117	173	221	24h>0h
Ksr2	255.555	-2.44391	0.26131	-9.35254	8.55689e-21	5.2408e-19	97	95	55	62	50	42	378	458	444	0h>24h
Marveld2	1409.1	-1.21966	0.130443	-9.35014	8.75349e-21	5.34673e-19	891	803	961	957	1122	1061	1647	2115	2103	0h>24h
Usp44	226.621	-2.05311	0.219722	-9.34412	9.26611e-21	5.64458e-19	91	93	91	128	143	121	368	371	333	0h>24h
Cass4	66.2205	-3.77941	0.404503	-9.34334	9.33428e-21	5.67083e-19	6	14	8	23	29	16	106	121	139	0h>24h
Frem2	562.888	-1.53437	0.164333	-9.33697	9.91327e-21	6.00643e-19	323	291	290	423	624	459	748	944	788	0h>24h
Sema3f	1151.17	-1.89164	0.202791	-9.32801	1.07875e-20	6.51865e-19	544	545	436	407	519	417	1319	1893	2224	0h>24h
Tinagl1	189.674	2.03423	0.218393	9.31456	1.22461e-20	7.38031e-19	278	324	352	406	367	316	64	78	79	24h>0h
Mical1	502.86	-1.98046	0.212684	-9.31173	1.25762e-20	7.55911e-19	229	174	236	169	198	173	611	762	1024	0h>24h
Col6a6	139.093	-2.16643	0.232888	-9.30245	1.37249e-20	8.22767e-19	57	47	55	21	13	15	178	264	238	0h>24h
Six1	579.626	-1.83513	0.197699	-9.28249	1.6557e-20	9.89918e-19	242	260	293	292	386	286	650	947	1119	0h>24h
Ascl2	456.941	1.5535	0.167607	9.26869	1.88442e-20	1.12369e-18	723	617	800	479	684	525	207	236	245	24h>0h
Mapk12	340.416	-1.72795	0.186522	-9.26406	1.96812e-20	1.17052e-18	177	163	154	83	127	108	399	573	592	0h>24h
Foxj2	659.976	-1.44925	0.156656	-9.25115	2.22094e-20	1.31741e-18	398	337	374	384	430	379	775	1007	1098	0h>24h
Lhx2	400.111	-1.61115	0.174434	-9.23649	2.54724e-20	1.50598e-18	207	213	197	138	211	167	470	669	662	0h>24h
Col6a1	1386.03	1.3016	0.140925	9.23612	2.55587e-20	1.50598e-18	2003	1989	2184	2577	2679	2376	643	833	908	24h>0h
Fam198b	83.0466	2.90165	0.314168	9.236	2.55884e-20	1.50598e-18	137	145	177	264	206	252	19	21	18	24h>0h
Hoxc13	98.9973	-2.4883	0.26948	-9.23371	2.61407e-20	1.53449e-18	35	26	33	38	40	29	136	183	182	0h>24h
Zfp618	383.026	-1.6869	0.182706	-9.23287	2.63469e-20	1.54259e-18	189	191	188	150	168	175	466	714	566	0h>24h
Ppp2r2c	3492.24	-1.40322	0.152143	-9.22302	2.8884e-20	1.68677e-18	2131	1789	2090	948	1184	1027	3784	5609	5788	0h>24h
Kif13a	962.59	-1.40184	0.152074	-9.21813	3.02321e-20	1.76094e-18	586	504	567	611	760	571	1078	1632	1468	0h>24h
Synj2	275.033	-1.7393	0.188956	-9.2048	3.42315e-20	1.98877e-18	133	140	123	140	135	141	369	471	416	0h>24h
Mmd	2583.81	-1.23867	0.134665	-9.19819	3.64017e-20	2.10943e-18	1649	1510	1659	1389	1653	1342	3144	3574	4044	0h>24h
Adam12	215.202	2.0477	0.222761	9.19236	3.84321e-20	2.22139e-18	370	383	328	299	321	340	83	86	78	24h>0h
Uchl1	11772	1.19501	0.130016	9.19119	3.88519e-20	2.23993e-18	17690	15377	18330	14994	19597	16047	6138	7171	7931	24h>0h
Ccdc3	73.4223	-3.13782	0.341497	-9.18842	3.98659e-20	2.29254e-18	20	11	16	15	18	22	124	130	135	0h>24h
Cdan1	600.691	-1.44715	0.157708	-9.17616	4.46734e-20	2.56248e-18	353	339	316	364	459	369	711	960	949	0h>24h
Fbln2	2241.35	1.41576	0.154687	9.15239	5.56866e-20	3.18612e-18	3121	3588	3477	4063	4385	4225	1120	1213	1278	24h>0h
Cd82	928.55	-1.98873	0.21743	-9.14652	5.87987e-20	3.35568e-18	406	345	422	182	264	149	937	1682	1863	0h>24h
Lhx1os	106.311	-3.14757	0.344583	-9.13444	6.57469e-20	3.74277e-18	28	13	27	10	12	20	138	259	178	0h>24h
Id1	750.347	1.72794	0.189376	9.12441	7.21261e-20	4.0956e-18	1083	1163	1367	2592	3377	2484	244	395	406	24h>0h
Snap91	519.097	-1.73169	0.190042	-9.11216	8.07583e-20	4.57428e-18	263	237	252	265	303	312	806	822	714	0h>24h
Gm10687	72.0424	-3.48623	0.38318	-9.09815	9.18845e-20	5.19148e-18	7	13	17	9	7	5	107	166	122	0h>24h
Samhd1	2669.32	-1.19001	0.130827	-9.09604	9.36859e-20	5.28005e-18	1779	1679	1630	1326	1637	1491	3165	4089	3776	0h>24h
Fam196a	76.3162	3.02794	0.332976	9.09358	9.5834e-20	5.38768e-18	141	127	158	102	108	87	19	15	15	24h>0h
Fbxo2	126.607	2.46826	0.271469	9.09224	9.70205e-20	5.44085e-18	234	181	260	72	92	64	27	41	48	24h>0h
Sox3	2104.94	2.33922	0.257569	9.08191	1.06687e-19	5.96814e-18	3961	3408	3643	3575	5155	3635	446	607	1038	24h>0h
Chrdl1	144.52	2.63531	0.290519	9.07103	1.17895e-19	6.57881e-18	235	278	264	290	265	347	42	49	27	24h>0h
Irak2	175.699	2.11437	0.233205	9.06654	1.22851e-19	6.83853e-18	319	291	283	216	273	222	57	83	56	24h>0h
Hic1	112.616	2.84259	0.313551	9.0658	1.23696e-19	6.86863e-18	179	203	238	81	145	106	15	30	38	24h>0h
Lpcat1	1312.69	-1.41763	0.156625	-9.0511	1.41536e-19	7.84e-18	755	687	800	794	945	887	1470	1981	2257	0h>24h
Cacnb1	492.715	-1.96853	0.217796	-9.03841	1.58965e-19	8.78391e-18	236	162	233	201	224	187	541	900	921	0h>24h
Trpv4	488.874	-1.68067	0.186	-9.0359	1.62664e-19	8.96214e-18	257	233	238	226	290	261	547	790	896	0h>24h
Emb	760.028	-1.78656	0.197723	-9.03568	1.62984e-19	8.96214e-18	349	302	422	408	383	418	1199	1180	1077	0h>24h
Nfkbil1	161.449	-2.62457	0.290516	-9.03416	1.6527e-19	9.0658e-18	51	33	58	45	56	25	182	307	349	0h>24h
Ildr2	175.74	2.23548	0.247562	9.02998	1.71709e-19	9.39617e-18	329	273	306	321	360	324	65	68	48	24h>0h
Ccdc80	55.5604	4.6257	0.512295	9.02938	1.72651e-19	9.42489e-18	97	110	128	200	183	172	1	6	6	24h>0h
Trio	1412.19	-1.33428	0.147938	-9.0192	1.8946e-19	1.03176e-17	931	773	808	806	946	820	1770	2266	1965	0h>24h
Lyve1	69.4316	-4.10238	0.455689	-9.00257	2.20486e-19	1.19783e-17	3	7	14	17	19	9	119	161	109	0h>24h
Pcbp4	2971.92	-2.04887	0.227798	-8.99424	2.37877e-19	1.28922e-17	1200	1108	1320	1111	1274	943	2849	5455	6200	0h>24h
Rbp1	283.967	2.25073	0.25027	8.9932	2.40143e-19	1.29838e-17	490	368	622	345	416	337	68	109	119	24h>0h
Foxn4	224.973	2.69592	0.299972	8.98723	2.53539e-19	1.36754e-17	463	364	396	207	247	145	28	76	79	24h>0h
Tfeb	988.206	-1.87935	0.209461	-8.97231	2.9035e-19	1.56236e-17	475	392	458	238	368	200	1062	1577	2033	0h>24h
She	219.167	-1.88664	0.210449	-8.96481	3.10825e-19	1.66856e-17	91	87	115	88	116	97	262	399	372	0h>24h
Fgd5	683.886	-1.42045	0.158476	-8.9632	3.15396e-19	1.68909e-17	372	356	439	297	438	319	787	1072	1113	0h>24h
Grin2a	84.1944	-3.45325	0.38561	-8.95527	3.38893e-19	1.81063e-17	13	16	15	6	6	12	159	188	106	0h>24h
Cdc42ep3	371.466	-1.82176	0.203578	-8.94871	3.59677e-19	1.91715e-17	140	161	213	125	146	118	470	629	627	0h>24h
Olfml2b	236.804	1.85543	0.207463	8.94341	3.77348e-19	2.0066e-17	374	347	443	489	669	523	98	113	92	24h>0h
Rtp4	84.8486	3.00736	0.336569	8.93534	4.05924e-19	2.15349e-17	156	161	155	76	99	85	13	15	28	24h>0h
Kctd14	84.1703	6.62435	0.742718	8.91906	4.70246e-19	2.48889e-17	118	147	260	32	61	47	2	1	2	24h>0h
Fgfr1	4057.84	-1.25228	0.140465	-8.91528	4.86604e-19	2.56945e-17	2566	2380	2569	2241	2982	2363	4554	5837	6652	0h>24h
Ank3	494.899	-1.47598	0.165651	-8.91014	5.09675e-19	2.685e-17	282	277	259	293	338	308	662	788	704	0h>24h
Adh1	67.6624	4.17805	0.469025	8.90794	5.19888e-19	2.73244e-17	95	144	162	152	97	143	6	4	11	24h>0h
Mt2	3988.08	-2.11646	0.237849	-8.89831	5.67038e-19	2.97333e-17	1199	1632	1846	2011	2822	2526	4452	8814	6285	0h>24h
Npr1	456.363	1.62425	0.18269	8.89077	6.06846e-19	3.17471e-17	795	658	707	379	418	356	169	232	267	24h>0h
Nmnat2	112.163	-2.37859	0.268267	-8.86647	7.54983e-19	3.94056e-17	36	41	36	40	33	24	171	218	168	0h>24h
Ptch1	821.214	-1.33043	0.150264	-8.85397	8.44578e-19	4.39803e-17	535	449	480	685	904	672	987	1345	1165	0h>24h
Zmat3	549.616	-1.49602	0.169032	-8.85056	8.70835e-19	4.52247e-17	291	311	297	332	396	403	752	884	762	0h>24h
Pde9a	185.76	-2.04313	0.230853	-8.85035	8.72476e-19	4.52247e-17	88	60	80	44	96	61	225	324	346	0h>24h
Ppic	705.843	-1.26559	0.143518	-8.81836	1.16149e-18	6.00679e-17	433	414	452	512	594	539	799	1104	1071	0h>24h
Cyth4	128.377	-3.01828	0.342419	-8.81458	1.20135e-18	6.19873e-17	37	33	18	30	45	35	144	279	268	0h>24h
Gad1	63.4394	-6.29124	0.715115	-8.79753	1.39865e-18	7.20032e-17	1	2	2	4	0	2	127	112	128	0h>24h
Gpr153	276.11	1.897	0.216001	8.78238	1.6005e-18	8.22073e-17	403	492	465	322	298	317	84	128	138	24h>0h
Agpat4	298.81	-1.75033	0.199449	-8.77582	1.69662e-18	8.69471e-17	147	125	158	177	183	141	333	535	515	0h>24h
Dpysl3	184.85	2.24467	0.255899	8.77171	1.75975e-18	8.9978e-17	297	319	338	492	511	443	74	58	56	24h>0h
Pbx3	438.155	-1.38919	0.158461	-8.76679	1.83832e-18	9.37832e-17	249	243	266	239	237	203	573	644	659	0h>24h
Loxl2	1291.76	1.40665	0.160527	8.76269	1.90643e-18	9.7039e-17	1701	1940	2234	2289	2329	2441	598	753	752	24h>0h
Clu	373.717	2.44705	0.279499	8.75513	2.03872e-18	1.03539e-16	454	612	919	1124	1111	1217	93	116	136	24h>0h
Ptgir	80.6624	-3.54123	0.404838	-8.74729	2.18546e-18	1.10743e-16	19	12	9	14	10	16	87	190	174	0h>24h
Cachd1	181.523	-1.81979	0.208315	-8.73579	2.41963e-18	1.22335e-16	93	76	82	89	172	118	250	283	305	0h>24h
Med13l	6471.89	-1.51896	0.173897	-8.73486	2.43956e-18	1.23067e-16	4017	3299	3161	3523	4321	3384	8653	11154	8622	0h>24h
Nedd9	148.534	2.33205	0.267308	8.72419	2.68085e-18	1.34938e-16	207	256	314	204	229	252	38	60	49	24h>0h
Mtor	8530.63	1.13797	0.130863	8.6959	3.44103e-18	1.72816e-16	13304	11510	11917	8252	10536	8748	4425	5586	5847	24h>0h
Tspan8	114.772	-2.5896	0.298049	-8.68849	3.67294e-18	1.84054e-16	38	22	43	24	36	20	176	234	174	0h>24h
Epha1	731.483	-1.67753	0.19319	-8.68332	3.8439e-18	1.92195e-16	341	361	389	211	316	215	760	1299	1297	0h>24h
Fst	286.943	-1.53349	0.176737	-8.67669	4.07436e-18	2.03268e-16	153	139	170	173	213	224	376	468	421	0h>24h
Gcgr	262.995	1.64853	0.190135	8.67031	4.3093e-18	2.14516e-16	447	361	443	109	137	93	119	130	127	24h>0h
Anxa7	1278.5	-1.14532	0.132114	-8.66916	4.35308e-18	2.16219e-16	830	778	887	1091	1347	1108	1426	1959	1865	0h>24h
Scml4	104.078	-2.40553	0.278295	-8.64383	5.43613e-18	2.69422e-16	39	25	40	23	37	33	135	203	186	0h>24h
Fdft1	2881.22	-1.32184	0.152933	-8.64326	5.46332e-18	2.70177e-16	1711	1544	1911	1576	1966	1832	3288	4132	4848	0h>24h
Fgf3	216.965	-2.32632	0.269562	-8.63001	6.13483e-18	3.02723e-16	68	62	97	35	37	33	243	376	470	0h>24h
Tmem130	275.031	-1.65786	0.192409	-8.61634	6.91302e-18	3.4038e-16	157	135	122	146	161	130	351	453	438	0h>24h
Rhd	328.166	-1.63797	0.190127	-8.61513	6.98636e-18	3.43243e-16	170	148	183	112	114	125	366	556	567	0h>24h
Nr5a1	52.2033	5.06276	0.587835	8.61254	7.14564e-18	3.49549e-16	83	101	134	90	89	69	3	4	2	24h>0h
Pdlim3	55.1303	4.00071	0.464515	8.61265	7.13917e-18	3.49549e-16	92	102	131	136	122	115	9	6	4	24h>0h
Zfp467	331.954	-1.83531	0.21326	-8.60599	7.56607e-18	3.69316e-16	172	120	165	113	135	93	371	608	579	0h>24h
Dll1	57.3816	3.48095	0.404848	8.59815	8.10102e-18	3.94575e-16	112	92	127	170	263	204	8	7	13	24h>0h
Sdcbp2	122.433	-2.48514	0.289435	-8.58617	8.99141e-18	4.37002e-16	49	39	28	34	36	29	155	226	241	0h>24h
Ank	406.817	-1.44043	0.167815	-8.58341	9.20997e-18	4.46664e-16	225	224	237	183	287	255	466	635	674	0h>24h
Mypop	304.362	-2.05891	0.240066	-8.57643	9.78669e-18	4.73617e-16	117	123	129	82	105	77	306	592	587	0h>24h
Cxcl5	102.268	2.29641	0.268477	8.55346	1.19454e-17	5.76819e-16	169	179	183	288	355	402	35	35	32	24h>0h
Dtx4	248.556	2.06204	0.241083	8.55322	1.19703e-17	5.76819e-16	495	378	384	285	356	303	66	98	124	24h>0h
Slc27a2	146.054	2.48853	0.291412	8.53956	1.3473e-17	6.47849e-16	237	262	277	240	231	205	31	36	65	24h>0h
Tnfrsf22	300.573	-1.53243	0.179608	-8.53205	1.43778e-17	6.8989e-16	164	160	159	162	223	233	402	497	424	0h>24h
Spry1	672.994	-1.48566	0.174173	-8.52981	1.46589e-17	7.01888e-16	351	409	345	342	475	406	794	1117	1048	0h>24h
Thbs1	2628.9	2.32342	0.272532	8.52531	1.52403e-17	7.28185e-16	4351	5048	4265	8155	8479	8588	1080	787	657	24h>0h
Bhlha9	52.7412	-4.11811	0.483745	-8.51299	1.69506e-17	8.08195e-16	11	4	3	7	11	5	85	96	115	0h>24h
Pstpip1	221.026	-2.43388	0.286135	-8.50605	1.79957e-17	8.56217e-16	78	60	79	55	59	52	212	446	475	0h>24h
Nr2f2	51.1094	3.67521	0.432371	8.50013	1.89377e-17	8.99142e-16	88	106	102	135	157	125	7	9	6	24h>0h
Col22a1	657.865	1.43713	0.169098	8.4988	1.91569e-17	9.07641e-16	1106	924	981	946	1176	827	265	394	403	24h>0h
Prkab1	760.387	-1.44626	0.170338	-8.49056	2.05647e-17	9.72304e-16	459	410	409	339	401	296	831	1204	1296	0h>24h
Rarb	56.2111	5.78912	0.682502	8.48221	2.20963e-17	1.04254e-15	118	91	139	49	31	44	0	5	1	24h>0h
Lmo2	145.332	-1.89505	0.22396	-8.46156	2.63829e-17	1.24219e-15	69	60	64	31	48	31	183	240	260	0h>24h
Plac8	186.021	2.60355	0.308254	8.44612	3.01156e-17	1.415e-15	273	294	437	196	186	208	49	37	69	24h>0h
Grik3	2245.23	-1.36497	0.161815	-8.43538	3.30133e-17	1.54793e-15	1465	1250	1215	1335	1789	1336	2449	3743	3494	0h>24h
Stk24	2962.03	-1.17011	0.138788	-8.43093	3.42943e-17	1.60466e-15	1918	1870	1915	2080	2595	2002	3435	4073	4680	0h>24h
Tfcp2l1	911.234	1.26574	0.150206	8.42669	3.55592e-17	1.66041e-15	1442	1327	1256	1097	1388	1116	443	577	573	24h>0h
Igtp	349.351	1.61966	0.192212	8.42641	3.56435e-17	1.66091e-15	567	490	597	395	416	379	141	160	209	24h>0h
Wisp2	56.3278	3.31138	0.393436	8.41659	3.87611e-17	1.80247e-15	104	104	113	366	324	327	5	14	12	24h>0h
Prrx2	891.278	-2.04233	0.242845	-8.40999	4.10052e-17	1.90291e-15	358	325	410	409	502	376	878	1493	1965	0h>24h
Rasgrp4	108.425	-2.14624	0.255405	-8.40328	4.34177e-17	2.01074e-15	42	42	41	23	25	40	155	205	165	0h>24h
Frmd6	1588.51	-1.15073	0.136943	-8.40297	4.35328e-17	2.01195e-15	1076	976	1037	825	995	779	1998	2192	2284	0h>24h
Pcsk6	224.732	-1.76578	0.210365	-8.3939	4.70267e-17	2.16899e-15	117	97	106	109	135	113	298	324	408	0h>24h
Sox12	2396.2	1.75724	0.209496	8.38795	4.94703e-17	2.27704e-15	4440	3524	3621	2705	3691	2730	756	1097	1433	24h>0h
Hexb	248.607	-1.88087	0.224476	-8.37895	5.34029e-17	2.44809e-15	93	102	138	78	146	139	372	372	408	0h>24h
Gpr83	83.8916	-2.59028	0.309133	-8.37917	5.33043e-17	2.44809e-15	30	18	27	25	15	22	139	151	134	0h>24h
Cmtm7	314.797	-1.82887	0.218661	-8.36396	6.06463e-17	2.77451e-15	134	133	167	122	132	141	347	516	612	0h>24h
Gpd2	250.784	-1.8118	0.217009	-8.34894	6.88789e-17	3.13844e-15	103	128	116	147	151	152	373	426	352	0h>24h
Cdk5r1	182.015	1.86882	0.223835	8.34911	6.87798e-17	3.13844e-15	311	317	264	340	431	315	63	85	85	24h>0h
Ebf2	95.0785	-2.43802	0.292557	-8.33349	7.84952e-17	3.5694e-15	40	23	30	49	48	47	143	181	152	0h>24h
Mfap4	102.594	2.56799	0.309154	8.30651	9.85591e-17	4.47276e-15	152	189	209	285	342	323	19	41	29	24h>0h
Ccnd1	2484.45	-1.27989	0.154233	-8.29842	1.05501e-16	4.77822e-15	1570	1440	1529	687	884	735	2612	3827	4104	0h>24h
Kcnj12	170.505	-2.03641	0.245509	-8.29466	1.089e-16	4.9223e-15	72	59	79	35	32	26	198	280	344	0h>24h
Tceb3	419.184	-1.44506	0.174613	-8.27578	1.27616e-16	5.75674e-15	233	202	272	257	326	280	553	613	648	0h>24h
Marcks	393.221	1.49033	0.180336	8.26418	1.40662e-16	6.3326e-15	576	541	703	891	874	869	193	213	204	24h>0h
1300017J02Rik	131.677	-2.19334	0.26557	-8.25902	1.46879e-16	6.59932e-15	56	44	48	52	41	54	202	258	179	0h>24h
Asb4	57.0209	-3.38917	0.411221	-8.24172	1.69749e-16	7.61178e-15	10	11	10	7	7	17	115	96	92	0h>24h
Sdc3	534.808	1.70915	0.207482	8.23759	1.75719e-16	7.86385e-15	848	815	904	636	840	626	161	282	312	24h>0h
Six4	707.517	-1.88212	0.228777	-8.22687	1.9217e-16	8.58309e-15	327	337	278	254	243	233	1130	1270	869	0h>24h
Tfap2a	111.978	-2.03975	0.248717	-8.20109	2.38207e-16	1.06111e-14	50	46	41	74	99	63	155	201	179	0h>24h
Ankrd39	273.084	1.71057	0.208582	8.20094	2.38516e-16	1.06111e-14	456	415	440	257	302	207	89	165	130	24h>0h
Fam167a	173.258	1.85269	0.225949	8.19959	2.41217e-16	1.07102e-14	303	279	267	148	202	181	58	74	92	24h>0h
Rasd2	1903.46	1.23621	0.150802	8.19756	2.45317e-16	1.08709e-14	2937	2704	2722	2622	3607	2497	910	1141	1329	24h>0h
Fgr	58.9132	-3.12027	0.38066	-8.19701	2.46442e-16	1.08994e-14	15	14	9	4	4	9	78	131	108	0h>24h
Slc48a1	362.728	-1.98358	0.242102	-8.19314	2.545e-16	1.12338e-14	151	180	125	142	188	182	398	659	685	0h>24h
Gm44	344.773	1.40383	0.171519	8.18472	2.72935e-16	1.2024e-14	531	478	560	638	618	542	163	219	180	24h>0h
Map4k4	7363.05	-1.05013	0.128647	-8.16285	3.27202e-16	1.43867e-14	5210	4546	5281	5418	6658	5211	7845	11066	10741	0h>24h
Lrp3	84.9399	2.43848	0.299136	8.15175	3.58688e-16	1.57405e-14	170	143	136	212	227	164	20	33	26	24h>0h
H2afy2	1150.29	-1.61746	0.198604	-8.14415	3.81941e-16	1.67284e-14	565	565	642	507	554	496	1140	2008	2086	0h>24h
Slc1a1	129.024	-2.51543	0.309051	-8.13921	3.97873e-16	1.73925e-14	29	32	60	25	45	29	172	266	219	0h>24h
Trim58	52.3549	5.94111	0.730266	8.13553	4.10127e-16	1.78936e-14	135	83	106	91	113	87	1	3	1	24h>0h
Amh	56.2026	5.52298	0.679427	8.12888	4.33292e-16	1.88678e-14	80	99	167	23	12	15	4	0	3	24h>0h
Ube2a	415.459	-1.56405	0.192423	-8.1282	4.35721e-16	1.89371e-14	187	235	234	312	345	323	584	615	632	0h>24h
Kalrn	882.479	-1.13266	0.139364	-8.12739	4.38646e-16	1.90276e-14	602	528	603	588	766	551	1008	1376	1225	0h>24h
Myo1e	869.358	-1.45505	0.179151	-8.12191	4.58908e-16	1.98684e-14	478	425	556	562	747	569	1038	1214	1539	0h>24h
Pak6	322.987	-1.4736	0.181638	-8.11286	4.9442e-16	2.1365e-14	171	184	180	95	84	58	365	529	526	0h>24h
Fstl3	107.421	2.30779	0.284541	8.11059	5.03737e-16	2.17261e-14	164	165	233	101	97	108	26	41	41	24h>0h
Cryba4	46.1051	-5.34075	0.658733	-8.10761	5.1625e-16	2.22233e-14	4	0	3	1	5	2	58	109	105	0h>24h
Rasd1	105.028	-2.2204	0.273966	-8.10469	5.28814e-16	2.27209e-14	32	44	40	27	38	24	132	187	198	0h>24h
Grhl3	570.311	-1.35594	0.167432	-8.09846	5.5659e-16	2.3869e-14	368	330	304	243	399	332	679	852	909	0h>24h
Cobl	118.782	2.27746	0.281625	8.08683	6.12364e-16	2.61615e-14	207	195	214	205	314	235	46	43	30	24h>0h
Akr1b8	519.746	-1.25004	0.154577	-8.08687	6.12173e-16	2.61615e-14	329	291	345	235	323	286	588	786	808	0h>24h
Pamr1	41.5944	-4.25253	0.526636	-8.0749	6.75311e-16	2.87963e-14	7	3	3	5	5	3	68	94	73	0h>24h
Cygb	49.2461	3.69126	0.457275	8.07231	6.89781e-16	2.93579e-14	81	87	119	71	95	48	6	5	10	24h>0h
Lgals7	297.772	-2.73039	0.338323	-8.07035	7.0098e-16	2.97785e-14	78	47	122	37	59	30	307	601	661	0h>24h
Gm2061	144.86	-2.21186	0.274354	-8.06209	7.49994e-16	3.18009e-14	62	49	50	58	85	58	230	286	187	0h>24h
Lss	1706.64	-1.27899	0.158659	-8.06126	7.55095e-16	3.19572e-14	1131	927	1066	1216	1404	1226	1796	2707	2740	0h>24h
Thy1	611.726	-1.50446	0.186636	-8.0609	7.57356e-16	3.1993e-14	325	343	329	442	506	527	644	1001	1071	0h>24h
Slc30a10	319.948	-1.82793	0.226994	-8.05275	8.0957e-16	3.40713e-14	168	127	146	142	173	121	453	621	406	0h>24h
RP23-404J7.9	73.3189	-3.02497	0.375645	-8.05275	8.0951e-16	3.40713e-14	21	19	10	15	22	28	122	157	107	0h>24h
Tnfrsf25	135.051	-2.20041	0.273339	-8.05012	8.27144e-16	3.47462e-14	49	54	48	30	40	45	145	255	269	0h>24h
Coro2a	1015.97	1.16884	0.145279	8.04553	8.58732e-16	3.60062e-14	1583	1348	1476	951	1414	1005	525	634	700	24h>0h
Sh3tc1	159.505	-2.16933	0.269987	-8.03495	9.36204e-16	3.91819e-14	55	72	54	39	45	26	176	306	304	0h>24h
Dapk3	994.172	1.43988	0.179326	8.02939	9.79591e-16	4.09219e-14	1582	1404	1567	1365	1759	1380	426	498	671	24h>0h
Rcan2	83.0705	-2.29665	0.286112	-8.02711	9.97973e-16	4.16129e-14	35	27	26	59	35	62	114	152	145	0h>24h
Cyp2s1	102.195	-2.03025	0.252998	-8.02478	1.01705e-15	4.23301e-14	46	38	42	22	25	17	136	187	166	0h>24h
Arhgef25	829.64	-1.29632	0.161613	-8.02115	1.04763e-15	4.35229e-14	537	448	521	414	510	383	883	1332	1317	0h>24h
Igf2	1334.6	-1.23026	0.153505	-8.01451	1.10574e-15	4.58528e-14	833	805	860	550	611	563	1391	2115	2102	0h>24h
Srebf2	12540.9	-1.42759	0.178316	-8.00597	1.18532e-15	4.90626e-14	7507	6528	7267	6990	8817	7084	13466	18027	23248	0h>24h
Foxi3	237.167	-1.68075	0.210713	-7.97649	1.50551e-15	6.22022e-14	123	128	101	108	156	106	292	377	408	0h>24h
Tnc	1228.69	1.63723	0.205298	7.97488	1.52526e-15	6.2903e-14	1983	2092	1724	2456	2772	2571	627	571	551	24h>0h
Rltpr	200.23	-1.78548	0.223937	-7.97315	1.54685e-15	6.36774e-14	111	88	83	67	66	39	234	341	354	0h>24h
Bmper	72.4682	2.9251	0.368	7.94864	1.88563e-15	7.74822e-14	129	97	178	175	178	204	15	15	20	24h>0h
Adamts2	319.244	1.50462	0.189645	7.93391	2.12354e-15	8.70997e-14	459	497	520	630	708	631	163	163	164	24h>0h
Crlf1	1300.24	-1.62433	0.205183	-7.91647	2.44342e-15	1.00039e-13	626	614	758	424	519	362	1293	2184	2443	0h>24h
Acsbg1	620.137	-1.30828	0.165589	-7.90078	2.77173e-15	1.13275e-13	358	342	419	359	382	324	713	894	1025	0h>24h
Fzd2	1605.32	-1.90339	0.24099	-7.89821	2.82932e-15	1.1542e-13	782	637	704	365	446	477	1565	2559	3529	0h>24h
Cntfr	188.217	1.7826	0.225864	7.89238	2.96478e-15	1.20728e-13	327	287	300	297	399	228	59	89	106	24h>0h
Cd200	71.5784	3.1039	0.393321	7.89152	2.98526e-15	1.21343e-13	92	164	143	158	170	186	15	15	14	24h>0h
Bcor	829.999	-1.19983	0.152106	-7.88811	3.06796e-15	1.24481e-13	576	508	491	596	727	573	1010	1192	1227	0h>24h
Aldoa	20748.3	-1.64175	0.208487	-7.87461	3.41801e-15	1.38436e-13	9792	9714	12084	5849	6765	6501	20485	33705	40568	0h>24h
Socs5	1496.27	-1.10832	0.140776	-7.87297	3.46308e-15	1.4001e-13	988	993	984	587	785	631	1884	2088	2067	0h>24h
Dcbld1	327.47	-1.32792	0.1687	-7.87149	3.50445e-15	1.4143e-13	195	191	198	170	160	154	389	484	520	0h>24h
Pecr	337.208	-1.35733	0.172555	-7.86606	3.65976e-15	1.47434e-13	212	175	207	200	232	271	384	534	530	0h>24h
Prkd2	592.879	-1.36203	0.173195	-7.86414	3.71638e-15	1.49449e-13	373	317	351	237	327	226	658	873	1019	0h>24h
Gcnt4	406.231	-2.11623	0.26912	-7.86352	3.73498e-15	1.4993e-13	153	161	162	88	91	90	728	744	454	0h>24h
Cald1	893.527	2.48026	0.315487	7.86169	3.78997e-15	1.51867e-13	1369	1660	1707	2223	2011	2304	347	274	161	24h>0h
Rgs4	93.5611	2.26137	0.287773	7.85817	3.89795e-15	1.55918e-13	167	167	149	276	341	303	34	33	28	24h>0h
Ngfr	551.964	-1.56412	0.199415	-7.84355	4.37992e-15	1.74887e-13	320	261	294	119	167	149	566	921	995	0h>24h
Srgap1	526.469	-1.1673	0.148873	-7.84089	4.47382e-15	1.78322e-13	354	320	342	403	476	374	607	768	792	0h>24h
Ppl	85.2591	2.43849	0.311287	7.83359	4.74144e-15	1.88656e-13	154	120	179	103	121	127	23	34	22	24h>0h
Nfkbia	617.042	-1.22307	0.156246	-7.82787	4.96186e-15	1.97079e-13	373	365	422	492	511	514	691	905	980	0h>24h
Dhcr7	3551.97	-1.22713	0.156967	-7.81776	5.37706e-15	2.13196e-13	2325	2066	2271	2638	3298	2864	3889	4949	6016	0h>24h
Gbp3	159.344	1.79285	0.230247	7.78663	6.8818e-15	2.72379e-13	245	258	270	130	176	116	73	73	64	24h>0h
Spred1	2461.5	-1.7756	0.228092	-7.78457	6.99524e-15	2.76385e-13	1107	1155	1220	1050	1226	1034	4123	4189	2817	0h>24h
1810041L15Rik	397.577	-1.24842	0.1604	-7.78319	7.07201e-15	2.78931e-13	259	240	238	181	199	151	477	587	598	0h>24h
Slc8b1	1234.56	1.47299	0.189449	7.77514	7.53663e-15	2.96738e-13	2076	1658	1962	1016	1262	943	459	687	817	24h>0h
Adcy1	430.009	1.35713	0.174575	7.77391	7.61024e-15	2.99116e-13	723	563	655	578	729	578	188	267	266	24h>0h
Ramp2	147.946	-2.25027	0.289651	-7.76889	7.91769e-15	3.1066e-13	42	69	49	80	101	85	176	258	299	0h>24h
Kirrel	172.893	1.82435	0.234868	7.76753	8.00286e-15	3.13457e-13	236	300	307	374	376	359	61	90	76	24h>0h
Ankrd34a	75.6663	-2.76079	0.355468	-7.76664	8.05985e-15	3.15143e-13	21	20	20	9	30	20	83	136	179	0h>24h
Zfp532	2402.22	-0.96117	0.123845	-7.76108	8.42075e-15	3.28685e-13	1756	1653	1693	1648	2243	1903	2784	3389	3239	0h>24h
Jph3	442.625	1.69109	0.218038	7.75594	8.76922e-15	3.41697e-13	770	628	723	310	334	318	131	253	248	24h>0h
Rspo4	424.981	1.2606	0.162563	7.75458	8.86388e-15	3.44791e-13	628	595	656	626	772	695	195	269	283	24h>0h
Myh11	139.694	2.00127	0.258354	7.74623	9.46599e-15	3.6758e-13	212	204	286	406	438	431	54	63	48	24h>0h
Tnfsf12	90.2015	-2.88987	0.373527	-7.7367	1.0203e-14	3.9552e-13	19	27	21	33	34	43	89	226	169	0h>24h
Igf2bp2	1084.81	-1.13769	0.147097	-7.73427	1.03995e-14	4.02448e-13	749	652	723	608	681	630	1384	1597	1426	0h>24h
Phka1	695.571	1.09003	0.140997	7.73082	1.06853e-14	4.12095e-13	1025	910	1032	983	1378	1210	366	494	464	24h>0h
Spn	155.17	-2.29254	0.29654	-7.73098	1.06722e-14	4.12095e-13	48	54	63	35	33	14	152	293	336	0h>24h
Tob1	609.682	-1.30835	0.169449	-7.72125	1.15194e-14	4.43507e-13	393	325	382	341	406	371	749	1034	799	0h>24h
Anxa5	487.628	1.51951	0.196803	7.72095	1.15468e-14	4.43807e-13	619	760	885	827	838	900	219	254	275	24h>0h
Tmcc3	576.47	1.20223	0.155951	7.70905	1.26758e-14	4.86373e-13	874	757	890	858	1078	856	275	406	362	24h>0h
Cdh11	241.001	2.28803	0.297421	7.69292	1.43817e-14	5.50891e-13	411	429	409	649	587	642	103	79	55	24h>0h
Lamc2	198.23	-1.87195	0.243365	-7.69194	1.44918e-14	5.5417e-13	70	109	86	63	73	54	262	351	313	0h>24h
Rnd3	84.7373	2.28872	0.297738	7.68701	1.50612e-14	5.74972e-13	131	136	174	153	159	178	28	26	31	24h>0h
Tjp2	2178.34	-1.06414	0.138451	-7.68602	1.51782e-14	5.78461e-13	1578	1363	1475	1540	1962	1479	2380	3074	3328	0h>24h
Amz2	629.222	-1.43995	0.187474	-7.68077	1.5813e-14	6.01639e-13	335	342	384	318	325	377	938	886	871	0h>24h
Fyn	2320.05	-1.17759	0.153323	-7.68047	1.58503e-14	6.02044e-13	1558	1437	1457	1638	2147	1622	2433	3444	3750	0h>24h
Tmem30b	152.308	-1.81753	0.23675	-7.677	1.62861e-14	6.1756e-13	62	81	67	16	38	51	203	237	264	0h>24h
Ripk3	809.288	-1.50631	0.196427	-7.66855	1.73945e-14	6.58486e-13	430	413	478	426	451	373	864	1187	1537	0h>24h
Mmrn2	46.4468	-3.0652	0.399746	-7.66786	1.74887e-14	6.60943e-13	10	12	9	7	8	7	64	93	91	0h>24h
Rsph3a	633.006	-1.39036	0.181455	-7.66228	1.82661e-14	6.89171e-13	318	361	416	322	333	363	734	923	1074	0h>24h
Nanos2	57.5736	-2.74086	0.358072	-7.65448	1.94091e-14	7.31075e-13	20	13	14	12	13	5	81	122	96	0h>24h
Sgsm1	504.124	-1.34761	0.176192	-7.64855	2.0326e-14	7.6434e-13	327	299	263	235	295	259	578	789	792	0h>24h
Prdm1	86.7655	-2.53387	0.33163	-7.64064	2.16145e-14	8.11441e-13	19	26	35	33	46	53	153	132	148	0h>24h
Ccr7	46.7966	-3.24633	0.425131	-7.63608	2.23929e-14	8.39271e-13	10	8	10	2	10	8	64	79	110	0h>24h
Lemd3	1195.94	-1.29097	0.169074	-7.6355	2.24944e-14	8.41679e-13	733	677	764	658	858	677	1636	1883	1486	0h>24h
Eno2	313.449	-1.38018	0.180907	-7.6292	2.36206e-14	8.82358e-13	167	188	189	83	97	92	400	507	436	0h>24h
Scd3	151.334	-1.8101	0.237646	-7.61677	2.60107e-14	9.70037e-13	62	76	72	58	63	64	179	247	278	0h>24h
Spred2	1740.04	-1.13139	0.148658	-7.61064	2.72736e-14	1.01546e-12	1260	1111	1040	506	654	485	1992	2590	2527	0h>24h
Serp2	190.083	-1.8872	0.248191	-7.6038	2.8757e-14	1.06893e-12	95	57	103	42	53	50	246	307	338	0h>24h
Gm21451	534.333	1.44965	0.190682	7.60244	2.906e-14	1.07842e-12	757	731	969	1007	899	901	208	340	311	24h>0h
Thnsl2	270.628	-1.62842	0.214396	-7.59537	3.06904e-14	1.13705e-12	134	113	169	80	70	91	323	411	486	0h>24h
Ccnd2	10701.8	-0.91713	0.120791	-7.59269	3.13327e-14	1.15895e-12	8203	7108	7912	3550	4096	3584	11863	15636	14107	0h>24h
Tusc5	89.9993	-2.43894	0.32146	-7.58708	3.27194e-14	1.20826e-12	26	28	34	23	21	19	94	188	178	0h>24h
Upf3b	286.426	-2.69066	0.3553	-7.57291	3.64951e-14	1.3455e-12	70	74	97	72	71	74	519	679	259	0h>24h
Capn12	222.9	-1.82402	0.240929	-7.57077	3.71015e-14	1.36562e-12	93	98	117	17	23	14	227	411	411	0h>24h
Fam124a	203.642	1.48586	0.19631	7.56896	3.76224e-14	1.38255e-12	306	307	327	402	445	428	82	120	118	24h>0h
Asb9	310.919	1.46598	0.193845	7.56262	3.95031e-14	1.4493e-12	450	452	528	315	439	431	159	151	177	24h>0h
Csf1	491.253	1.46208	0.193492	7.55628	4.14756e-14	1.5192e-12	687	842	718	1088	1282	1064	246	257	269	24h>0h
Mthfd1	2034.61	-1.082	0.143248	-7.55335	4.242e-14	1.55128e-12	1350	1230	1516	1133	1591	1175	2153	3049	3056	0h>24h
Usp43	236.706	-1.64554	0.218041	-7.5469	4.45724e-14	1.62736e-12	132	127	99	52	65	52	284	377	409	0h>24h
Lima1	1290.41	1.1179	0.148188	7.54382	4.56414e-14	1.6637e-12	1943	1649	1950	1828	2164	1758	662	968	798	24h>0h
Gramd1a	592.03	-1.1011	0.146121	-7.53558	4.86169e-14	1.76931e-12	384	389	405	323	402	382	705	881	810	0h>24h
Atp12a	82.7979	2.19637	0.291493	7.5349	4.88723e-14	1.77575e-12	148	130	148	75	123	106	27	37	24	24h>0h
Fign	149.024	-2.68776	0.356932	-7.53017	5.06736e-14	1.83824e-12	61	39	25	77	68	57	280	270	203	0h>24h
6030458C11Rik	1832.18	-1.01537	0.134897	-7.52698	5.19263e-14	1.88067e-12	1245	1203	1351	941	1189	941	2227	2654	2373	0h>24h
Afap1l1	1179.01	-1.25478	0.167115	-7.50853	5.97968e-14	2.16225e-12	757	698	725	737	946	790	1318	1615	2020	0h>24h
Ifit1	60.3306	2.46443	0.328258	7.50761	6.02185e-14	2.17402e-12	111	100	109	136	129	171	16	22	17	24h>0h
Dusp5	1874.3	-1.38629	0.184752	-7.50351	6.2133e-14	2.23956e-12	1138	962	1154	624	837	717	2086	2557	3451	0h>24h
Casz1	2505.79	-1.19689	0.159754	-7.4921	6.77788e-14	2.43917e-12	1745	1558	1457	1320	1882	1307	2689	3764	3977	0h>24h
Ccdc162	53.3222	-2.92353	0.390432	-7.48793	6.9967e-14	2.51392e-12	8	12	19	14	18	5	76	103	102	0h>24h
Ptprcap	43.8353	-3.25873	0.435328	-7.4857	7.11654e-14	2.55292e-12	7	9	10	6	14	12	57	81	100	0h>24h
Lzts1	427.788	-1.36716	0.182688	-7.48354	7.23473e-14	2.5912e-12	270	233	246	148	196	168	449	717	684	0h>24h
Nphp1	606.141	1.06781	0.142734	7.48115	7.36777e-14	2.63468e-12	879	830	860	863	1101	946	330	425	409	24h>0h
Cpe	269.058	2.01953	0.270089	7.47727	7.58795e-14	2.70913e-12	393	402	560	601	629	598	114	79	118	24h>0h
Erap1	966.325	1.96559	0.262885	7.47701	7.6034e-14	2.71036e-12	1493	1592	1730	1558	1758	1873	456	423	266	24h>0h
Ifitm3	616.237	1.52451	0.204147	7.46769	8.16129e-14	2.90465e-12	908	860	1103	537	599	549	234	307	410	24h>0h
Mex3d	3509.02	1.4964	0.20045	7.4652	8.31714e-14	2.95546e-12	5640	4987	5613	4661	6139	4974	1298	1762	2448	24h>0h
Gli1	83.9041	-2.18606	0.293374	-7.45143	9.23334e-14	3.27588e-12	36	26	33	38	55	39	99	156	158	0h>24h
Palm	713.046	1.44643	0.194207	7.44788	9.48536e-14	3.36002e-12	1112	1072	1081	928	1114	851	263	405	482	24h>0h
Ank1	304.266	-1.40279	0.188574	-7.43892	1.01513e-13	3.59027e-12	156	186	180	133	160	105	351	474	492	0h>24h
Lama4	406.448	1.19694	0.160963	7.43614	1.03667e-13	3.66076e-12	615	560	597	782	848	787	221	246	264	24h>0h
A930024E05Rik	36.5628	-4.99552	0.671838	-7.4356	1.04098e-13	3.66452e-12	3	1	3	13	13	10	43	90	82	0h>24h
H2-Ab1	63.3162	-2.3519	0.3163	-7.43567	1.04039e-13	3.66452e-12	19	21	25	10	17	9	89	118	108	0h>24h
Serpina3g	110.081	2.25248	0.303166	7.42985	1.08724e-13	3.82139e-12	178	160	234	220	267	300	34	29	50	24h>0h
Slc5a5	101.789	-2.02534	0.272736	-7.426	1.11935e-13	3.92815e-12	52	35	39	9	28	27	126	193	170	0h>24h
Bzrap1	331.716	-1.46206	0.196936	-7.42405	1.13596e-13	3.98026e-12	221	148	186	92	108	79	392	546	514	0h>24h
Jag1	1263.64	-1.29455	0.174458	-7.42039	1.16773e-13	4.08525e-12	838	775	673	750	959	745	1709	1851	1732	0h>24h
Stox1	245.35	1.44533	0.195204	7.40423	1.31914e-13	4.60783e-12	424	330	371	275	293	298	121	139	130	24h>0h
Col4a5	123.991	1.99365	0.269753	7.39064	1.46129e-13	5.09647e-12	178	214	228	434	479	340	43	64	41	24h>0h
Muc1	74.9103	2.24859	0.304278	7.3899	1.46935e-13	5.11667e-12	143	110	136	52	71	54	18	31	29	24h>0h
Jakmip1	1558.9	-1.10708	0.14985	-7.38793	1.49129e-13	5.18509e-12	1068	912	1122	776	989	690	1679	2221	2454	0h>24h
Vsx2	34.8952	-4.10305	0.555443	-7.38699	1.5019e-13	5.21398e-12	5	5	2	5	3	0	47	75	76	0h>24h
Cxcl12	106.977	2.31582	0.313671	7.38299	1.54779e-13	5.36505e-12	146	219	190	482	511	527	31	30	45	24h>0h
Padi2	200.676	1.63123	0.221168	7.37555	1.63666e-13	5.6644e-12	352	321	275	183	199	169	77	104	111	24h>0h
Ak5	196.597	1.42897	0.193901	7.36957	1.71176e-13	5.91525e-12	287	291	320	89	116	88	87	116	114	24h>0h
Tex19.2	234.301	2.37644	0.322584	7.36687	1.74675e-13	6.02696e-12	307	315	619	188	202	161	49	90	89	24h>0h
Ptprn2	52.0264	-2.72473	0.370107	-7.362	1.81172e-13	6.24161e-12	15	11	17	15	19	7	68	111	92	0h>24h
Sez6l	43.5041	-3.89219	0.528926	-7.35867	1.85753e-13	6.38966e-12	4	11	2	5	7	4	68	80	94	0h>24h
Adgra2	316.29	1.62474	0.220828	7.35751	1.87378e-13	6.43578e-12	536	448	515	301	343	275	98	180	189	24h>0h
Arrb1	269.502	-1.66808	0.226746	-7.35661	1.8864e-13	6.4693e-12	152	140	111	130	120	94	299	447	483	0h>24h
Txnip	3711	-0.948352	0.12905	-7.34874	2.00079e-13	6.85118e-12	2839	2351	2756	3166	3973	3236	4043	5213	5294	0h>24h
Gnas	954.789	-1.79222	0.244282	-7.33668	2.18963e-13	7.48647e-12	427	435	478	547	689	518	851	1718	1928	0h>24h
Efnb2	415.124	-1.22818	0.167586	-7.32863	2.32519e-13	7.93797e-12	257	232	290	260	278	240	529	632	561	0h>24h
Pik3c2b	2156.22	-1.42278	0.194227	-7.32533	2.38304e-13	8.1232e-12	1444	1201	1016	975	1301	878	2342	3624	3447	0h>24h
Irf7	203.541	1.57861	0.21563	7.32092	2.46283e-13	8.38253e-12	305	285	368	197	245	203	73	117	116	24h>0h
Soga1	655.157	-1.3086	0.178919	-7.31395	2.59405e-13	8.81586e-12	421	399	358	278	419	268	692	1080	1026	0h>24h
Gipc3	39.4536	-3.43363	0.469725	-7.30988	2.6738e-13	9.07324e-12	8	6	7	13	19	15	47	85	86	0h>24h
Rap1gap	361.827	1.52655	0.208841	7.3096	2.67932e-13	9.07837e-12	607	528	548	413	563	396	127	198	235	24h>0h
Chst1	401.547	-1.31409	0.179981	-7.30128	2.85047e-13	9.64382e-12	258	222	242	135	196	152	434	605	674	0h>24h
Serpinf1	436.004	1.28545	0.176077	7.30046	2.86777e-13	9.68784e-12	594	673	665	1164	1243	1338	231	247	272	24h>0h
Spry2	539.233	-1.11901	0.153312	-7.2989	2.90127e-13	9.78636e-12	348	354	362	351	473	338	592	799	811	0h>24h
Snx21	352.923	-1.54058	0.21108	-7.29856	2.9086e-13	9.79646e-12	194	201	169	163	216	161	368	608	603	0h>24h
Selenbp1	68.5814	2.58509	0.354254	7.29729	2.9362e-13	9.87471e-12	96	114	159	44	33	34	18	18	22	24h>0h
Arhgap9	45.9838	-2.8096	0.385097	-7.29581	2.96859e-13	9.96883e-12	12	11	13	6	10	6	64	82	94	0h>24h
Nav1	3109.26	-1.40376	0.192469	-7.29343	3.02155e-13	1.01316e-11	2096	1797	1432	1316	1643	1445	3961	5075	4353	0h>24h
1700017B05Rik	1698.1	-1.4062	0.192994	-7.28626	3.18681e-13	1.06699e-11	1030	969	910	590	828	611	1707	2626	3079	0h>24h
Hba-a1	47.58	3.37465	0.463275	7.28434	3.2324e-13	1.08066e-11	62	94	116	0	4	3	6	11	8	24h>0h
Col8a1	77.1262	2.45596	0.337218	7.283	3.26474e-13	1.08985e-11	120	158	128	327	337	328	25	27	18	24h>0h
Rfx8	37.9612	-3.70142	0.50926	-7.26823	3.64227e-13	1.21409e-11	5	6	6	10	5	4	44	77	92	0h>24h
Dmrt3	484.637	-1.35467	0.186493	-7.26391	3.76063e-13	1.2517e-11	290	265	299	358	409	374	539	679	862	0h>24h
Dgkg	32.2096	-4.80124	0.661064	-7.2629	3.78884e-13	1.25923e-11	3	2	2	3	6	4	44	75	68	0h>24h
Nbeal2	1599.73	-1.15961	0.159909	-7.25168	4.11624e-13	1.36604e-11	1156	1006	932	641	891	604	1755	2398	2442	0h>24h
Acot13	506.997	-1.23569	0.170408	-7.25133	4.12685e-13	1.36755e-11	304	279	366	344	444	403	560	768	797	0h>24h
Tgm1	76.117	2.15735	0.297561	7.25013	4.16383e-13	1.37778e-11	121	122	147	65	74	57	22	27	34	24h>0h
Cfap74	267.566	1.44142	0.198969	7.24446	4.3416e-13	1.4345e-11	443	367	416	439	443	477	130	171	126	24h>0h
Sdc4	8230.79	-1.1386	0.157175	-7.24416	4.35134e-13	1.43563e-11	5506	4881	5736	3943	5211	3754	8223	12530	13205	0h>24h
Fam19a3	46.769	-2.83572	0.391496	-7.24328	4.37952e-13	1.44282e-11	14	12	10	7	6	5	60	93	93	0h>24h
Adgrg6	63.8548	2.57147	0.355395	7.23553	4.63724e-13	1.5255e-11	107	131	102	87	97	61	20	16	18	24h>0h
Ophn1	325.925	1.2155	0.168158	7.22835	4.88889e-13	1.60594e-11	489	435	504	644	827	663	178	210	193	24h>0h
Cgnl1	1585.52	-1.14258	0.158501	-7.20864	5.65123e-13	1.85367e-11	1085	888	1131	904	1142	911	1748	2638	2132	0h>24h
Csnk2a1	3703.47	-1.06519	0.147795	-7.20718	5.71241e-13	1.87102e-11	2402	2577	2507	3309	4005	3216	4425	5754	4688	0h>24h
Tbc1d30	90.1009	-2.10107	0.291637	-7.2044	5.83006e-13	1.90679e-11	31	31	45	31	38	31	120	181	135	0h>24h
Zcchc14	7001.49	1.07056	0.148629	7.20287	5.89582e-13	1.92551e-11	10914	9696	9052	5747	7839	5958	3890	5111	4417	24h>0h
Vwa2	161.922	-1.57365	0.21866	-7.1968	6.16432e-13	2.0103e-11	100	78	77	84	74	61	207	258	255	0h>24h
Plcb2	226.913	-1.73006	0.240798	-7.18468	6.73651e-13	2.19373e-11	113	98	119	80	63	100	229	378	444	0h>24h
Slc26a10	95.6217	-2.7108	0.377328	-7.18419	6.76055e-13	2.19839e-11	17	35	27	22	45	33	95	215	194	0h>24h
Crxos	97.5952	2.91412	0.405813	7.18095	6.92285e-13	2.24794e-11	189	134	221	39	56	36	8	38	24	24h>0h
Wwc1	1474.71	-1.13574	0.158519	-7.1647	7.79556e-13	2.52769e-11	1092	813	991	972	1234	837	1607	2188	2254	0h>24h
Thbs2	523.841	1.42617	0.19923	7.15843	8.16071e-13	2.64229e-11	785	840	758	1477	1744	1957	294	281	258	24h>0h
Ephb6	321.789	1.50254	0.209992	7.15523	8.35302e-13	2.70069e-11	515	458	519	548	625	506	111	186	208	24h>0h
Nsdhl	626.031	-1.0911	0.152612	-7.14952	8.70812e-13	2.81148e-11	418	400	435	383	479	329	660	956	931	0h>24h
Ero1l	7909.04	-1.50468	0.210742	-7.1399	9.33969e-13	3.01108e-11	3922	4384	4586	2941	3476	3241	12673	11925	9532	0h>24h
Ippk	1127.65	-1.10123	0.154283	-7.1377	9.49078e-13	3.05544e-11	788	680	780	802	927	839	1249	1529	1802	0h>24h
Aplp1	1340.76	-1.38405	0.194001	-7.13423	9.73333e-13	3.12906e-11	771	751	804	580	625	568	1314	2074	2446	0h>24h
Slc8a2	136.344	1.91716	0.268814	7.13193	9.89722e-13	3.17723e-11	226	227	222	192	285	160	34	63	75	24h>0h
Sept8	397.532	1.23431	0.173121	7.12973	1.00565e-12	3.22379e-11	563	589	592	451	602	539	222	229	249	24h>0h
Tmem86a	423.215	1.42906	0.200564	7.12522	1.03918e-12	3.32422e-11	639	585	713	606	731	504	159	242	287	24h>0h
Galnt12	936.513	1.0635	0.14926	7.12512	1.03992e-12	3.32422e-11	1359	1206	1408	983	1278	952	468	656	687	24h>0h
Btbd17	49.273	-3.39576	0.477736	-7.10803	1.17712e-12	3.75748e-11	8	5	14	0	2	1	59	83	129	0h>24h
Ddr1	1244.64	-1.48093	0.208486	-7.10328	1.21831e-12	3.88347e-11	683	631	745	777	861	658	1201	1953	2370	0h>24h
Il1r2	67.6661	-2.43519	0.343155	-7.09647	1.27988e-12	4.07398e-11	15	24	27	11	15	22	110	105	121	0h>24h
Grb14	64.2234	2.63691	0.37162	7.09572	1.28678e-12	4.09017e-11	118	128	99	92	95	128	13	14	26	24h>0h
Mgat3	221.169	-1.52046	0.214457	-7.08983	1.34281e-12	4.26228e-11	112	133	112	90	105	88	247	379	356	0h>24h
Klf11	2644.88	0.922938	0.130265	7.0851	1.38947e-12	4.40421e-11	3776	3438	3629	3691	4629	3846	1643	1988	1778	24h>0h
H2-DMa	200.773	-1.74967	0.247101	-7.08078	1.43341e-12	4.53713e-11	81	87	121	83	99	106	247	290	385	0h>24h
Sat1	341.474	-1.16421	0.164626	-7.07188	1.52844e-12	4.83116e-11	218	223	218	215	300	223	398	516	490	0h>24h
4932442L08Rik	197.626	1.74561	0.247194	7.06171	1.64465e-12	5.19123e-11	304	289	361	425	537	548	102	82	81	24h>0h
Pld2	539.015	-1.07298	0.151961	-7.06089	1.65441e-12	5.21475e-11	374	364	348	333	349	300	631	789	749	0h>24h
Ttc28	368.275	-1.29623	0.183605	-7.05986	1.66668e-12	5.24609e-11	226	241	198	233	285	261	456	544	552	0h>24h
Sort1	3160.14	-0.901296	0.127687	-7.05863	1.68153e-12	5.28546e-11	2360	2263	2272	2432	2894	2497	3428	4296	4519	0h>24h
Cers4	271.076	-1.30353	0.184723	-7.05669	1.70514e-12	5.35226e-11	178	156	155	105	129	108	356	400	384	0h>24h
Psors1c2	76.3992	-2.45953	0.348645	-7.05453	1.73188e-12	5.42865e-11	24	20	30	12	9	5	77	157	158	0h>24h
Dscaml1	100.308	-2.51414	0.356433	-7.05363	1.74313e-12	5.45634e-11	40	24	30	49	64	26	94	197	228	0h>24h
Plch2	120.785	2.03618	0.288801	7.05045	1.78338e-12	5.5746e-11	215	210	182	128	190	120	31	45	66	24h>0h
BC021891	62.9006	3.04435	0.431812	7.05017	1.78697e-12	5.57812e-11	105	84	165	91	86	111	14	8	18	24h>0h
Rdh11	441.613	-1.15072	0.163415	-7.04169	1.89925e-12	5.92044e-11	275	274	310	328	324	316	540	599	664	0h>24h
Prkar2a	957.168	-1.04023	0.147865	-7.03499	1.99272e-12	6.20323e-11	709	612	640	475	636	444	1174	1381	1255	0h>24h
Irgm2	329.678	1.35659	0.192883	7.03324	2.01796e-12	6.27318e-11	580	423	485	414	473	430	148	198	206	24h>0h
Pard3	696.943	-0.981305	0.139555	-7.03167	2.04082e-12	6.33551e-11	495	453	521	460	628	561	769	990	994	0h>24h
Pik3cd	3192.17	-0.999923	0.142236	-7.03001	2.06515e-12	6.40224e-11	2282	2080	2306	1637	2042	1734	3355	4385	4959	0h>24h
Klhdc2	2378.95	-1.15293	0.164105	-7.02553	2.13253e-12	6.60207e-11	1630	1335	1668	1301	1711	1330	2725	3117	3912	0h>24h
Cd109	364.411	-1.8558	0.26472	-7.01045	2.37548e-12	7.34418e-11	156	157	181	221	162	236	647	601	413	0h>24h
Ccar2	1091.88	-1.27601	0.182204	-7.0032	2.50173e-12	7.72392e-11	706	630	663	313	395	317	1066	1762	1822	0h>24h
Kif19a	146.68	-1.68008	0.239955	-7.00165	2.52965e-12	7.79947e-11	80	63	76	40	54	32	171	222	275	0h>24h
Nxph3	301.961	-1.86682	0.266692	-6.99993	2.56096e-12	7.88523e-11	141	108	160	130	137	109	285	528	622	0h>24h
Os9	448.737	1.33898	0.191408	6.99544	2.64422e-12	8.13052e-11	679	626	712	752	898	689	173	310	282	24h>0h
Arhgef1	3865.37	-1.16347	0.166383	-6.99271	2.69621e-12	8.27913e-11	2834	2292	2347	1985	2513	1896	4054	5664	6269	0h>24h
Sgk3	2053.8	-2.02222	0.289402	-6.98758	2.79661e-12	8.57578e-11	739	848	953	1226	1404	1349	4011	3390	2121	0h>24h
Sh3d19	1122.8	0.978347	0.140106	6.98289	2.89179e-12	8.8556e-11	1612	1496	1554	1745	2097	1816	689	815	733	24h>0h
Set	6553.36	-0.88125	0.126256	-6.97984	2.9551e-12	9.03726e-11	4841	4379	5244	3729	4488	3710	6838	9295	9199	0h>24h
Gm29096	30.0597	-4.92349	0.705679	-6.97695	3.01653e-12	9.21265e-11	1	2	3	3	5	1	57	53	61	0h>24h
Fmnl1	632.365	-1.33285	0.191124	-6.97376	3.0858e-12	9.4115e-11	404	385	334	227	312	258	653	1026	1038	0h>24h
Mx2	86.492	2.12882	0.305391	6.97079	3.15165e-12	9.59937e-11	142	142	156	98	103	114	38	29	27	24h>0h
Ptges	485.429	-1.26316	0.181237	-6.96964	3.17759e-12	9.66536e-11	274	298	322	207	275	241	514	730	807	0h>24h
Hsd3b1	40.6073	8.76417	1.25863	6.96327	3.32472e-12	1.00993e-10	51	104	98	95	116	113	0	0	0	24h>0h
Cited1	288.098	1.38929	0.199594	6.96056	3.38925e-12	1.02815e-10	446	370	494	510	693	544	133	151	189	24h>0h
Trap1a	1084.39	-1.03728	0.14907	-6.95833	3.44321e-12	1.04312e-10	737	661	832	563	768	654	1167	1691	1495	0h>24h
Rnf149	1537.46	-1.03615	0.14904	-6.95216	3.59739e-12	1.08837e-10	1100	890	1176	935	1177	896	1761	2108	2269	0h>24h
Scn2b	66.5352	-2.22991	0.320837	-6.95029	3.64537e-12	1.10141e-10	23	29	21	18	9	4	84	127	117	0h>24h
Ube2ql1	73.4849	-2.69926	0.3884	-6.94968	3.66106e-12	1.10467e-10	24	9	29	40	31	40	113	114	150	0h>24h
Slc35d3	64.4423	-2.4258	0.34911	-6.94853	3.69103e-12	1.11223e-10	14	28	21	13	23	3	91	118	114	0h>24h
Ntsr1	65.8943	-2.16427	0.311568	-6.94638	3.74766e-12	1.12779e-10	24	28	23	33	39	24	100	108	110	0h>24h
Wt1	132.107	1.98415	0.285672	6.94556	3.76958e-12	1.13288e-10	185	217	259	262	349	272	40	46	73	24h>0h
Sox8	265.765	-1.40536	0.202401	-6.94343	3.82686e-12	1.14856e-10	153	151	152	67	118	112	290	394	470	0h>24h
Megf11	566.452	1.1473	0.16545	6.93439	4.07979e-12	1.22285e-10	853	833	753	486	622	499	281	393	377	24h>0h
Txnrd1	4645.14	-0.982272	0.141735	-6.93034	4.19817e-12	1.25667e-10	3400	3030	3353	3356	4283	3254	4825	6419	7170	0h>24h
Fam204a	780.77	-1.28467	0.185384	-6.92981	4.21415e-12	1.25979e-10	490	438	496	519	646	453	1027	1320	928	0h>24h
Fzd7	1436.62	-1.01026	0.145977	-6.92069	4.49434e-12	1.34177e-10	1021	959	1004	1098	1339	1180	1600	1894	2213	0h>24h
B4galnt1	268.483	-1.3483	0.194939	-6.91654	4.62805e-12	1.37987e-10	153	158	163	128	203	137	299	392	460	0h>24h
Spns2	304.633	1.4081	0.204014	6.90196	5.12898e-12	1.52721e-10	528	403	457	295	426	346	136	158	202	24h>0h
Inhbb	377.588	-1.39179	0.201709	-6.89998	5.20085e-12	1.54657e-10	223	207	223	196	182	166	378	601	665	0h>24h
Pald1	4279.57	-1.41579	0.205657	-6.88422	5.81062e-12	1.72563e-10	2454	2274	2585	1896	2245	1712	3968	6871	7959	0h>24h
Idi1	2791.19	-1.95922	0.284687	-6.88203	5.90055e-12	1.75003e-10	1022	1141	1417	1262	1468	1565	5276	4700	2884	0h>24h
Plxnb2	1487.48	-0.973817	0.141562	-6.87908	6.02423e-12	1.78437e-10	1131	973	1040	981	1067	905	1656	1994	2208	0h>24h
Ctgf	406.441	1.98721	0.28895	6.87734	6.09788e-12	1.79927e-10	664	710	652	779	913	891	202	113	157	24h>0h
Gli2	123.921	2.30823	0.335615	6.87763	6.08585e-12	1.79927e-10	266	220	158	386	476	366	23	55	48	24h>0h
Doc2a	58.9333	2.40997	0.350423	6.87733	6.09842e-12	1.79927e-10	97	113	100	83	74	71	12	25	19	24h>0h
Pkm	30271.9	-1.52749	0.222122	-6.87681	6.12093e-12	1.80154e-10	15792	13876	19337	11942	14215	11465	29218	46322	59961	0h>24h
Serpinb6b	31.2453	3.72714	0.541989	6.87678	6.12205e-12	1.80154e-10	56	58	68	94	74	86	4	3	6	24h>0h
Coro2b	409.933	1.35564	0.197185	6.87495	6.20133e-12	1.8225e-10	686	613	544	559	715	711	169	261	260	24h>0h
Pla2g4a	110.455	2.07758	0.302503	6.86796	6.51274e-12	1.91153e-10	174	199	184	185	189	199	47	48	29	24h>0h
Larp1b	1056.99	0.989767	0.144189	6.86435	6.67937e-12	1.95789e-10	1473	1405	1526	1025	1384	1139	544	807	766	24h>0h
Serping1	310.795	1.79877	0.262469	6.85327	7.21789e-12	2.11301e-10	405	522	583	447	503	627	139	105	163	24h>0h
Ass1	416.74	1.32525	0.193681	6.84246	7.78423e-12	2.27586e-10	652	608	604	530	562	522	189	222	297	24h>0h
Gp5	67.5277	-2.54843	0.372459	-6.84216	7.80067e-12	2.27771e-10	20	18	24	14	10	15	66	132	152	0h>24h
Col6a4	165.646	-1.61335	0.235826	-6.84128	7.8489e-12	2.28884e-10	99	87	69	56	47	41	200	289	256	0h>24h
Srxn1	715.982	-1.09917	0.161142	-6.82111	9.03391e-12	2.63101e-10	509	429	491	505	603	543	761	1018	1136	0h>24h
Slc25a12	324.63	-1.27354	0.186877	-6.81486	9.43585e-12	2.74453e-10	217	168	211	205	259	237	436	456	462	0h>24h
Uck1	1001.65	1.05343	0.154591	6.81429	9.47281e-12	2.75174e-10	1455	1344	1435	939	1269	981	508	668	768	24h>0h
Tex2	1670.34	-0.877046	0.12874	-6.81256	9.58767e-12	2.78153e-10	1214	1187	1287	985	1263	938	1751	2415	2283	0h>24h
Man2a1	1658.43	-1.66817	0.2451	-6.80609	1.00287e-11	2.90575e-10	824	782	881	982	1131	1031	2650	3024	1721	0h>24h
Slc16a13	236.236	-1.4046	0.206419	-6.80458	1.01345e-11	2.93264e-10	121	133	152	107	114	87	253	393	382	0h>24h
Epha8	847.79	1.40722	0.206818	6.80416	1.01642e-11	2.93748e-10	1433	1226	1195	1175	1464	1073	311	501	585	24h>0h
Adck4	285.354	1.35207	0.198796	6.8013	1.03676e-11	2.99245e-10	405	407	474	353	417	302	113	185	184	24h>0h
Pim1	3817.39	1.45595	0.214138	6.79912	1.05258e-11	3.03422e-10	5935	5458	6141	4250	5926	3962	1270	2229	2664	24h>0h
Nlrp12	27.4706	-4.78953	0.704795	-6.79563	1.07838e-11	3.10464e-10	2	2	2	3	5	6	48	60	49	0h>24h
Evc2	537.768	-1.22586	0.18056	-6.78923	1.12731e-11	3.24138e-10	351	286	375	243	298	201	554	883	823	0h>24h
Col2a1	325.569	1.28048	0.1887	6.78582	1.15432e-11	3.31481e-10	543	402	504	255	347	307	149	218	200	24h>0h
Dennd3	559.531	-1.0949	0.161377	-6.78475	1.16286e-11	3.33511e-10	403	359	355	322	363	316	597	860	820	0h>24h
Prkar1a	6915.94	-0.851246	0.125542	-6.78054	1.19728e-11	3.42948e-10	5193	4649	5631	5124	6464	5463	7651	9134	9626	0h>24h
Etf1	3302.83	-1.24498	0.18366	-6.77872	1.21248e-11	3.46863e-10	1783	2099	2249	2342	2571	2536	4615	4896	4143	0h>24h
Ccsap	127.406	-1.66279	0.245544	-6.77187	1.27127e-11	3.6322e-10	65	58	69	51	66	35	138	236	208	0h>24h
Adamts12	30.1754	4.25851	0.628887	6.77151	1.27447e-11	3.63674e-10	64	66	49	144	150	147	1	5	3	24h>0h
Ltb	69.3194	-3.28328	0.484885	-6.77126	1.27666e-11	3.63839e-10	8	6	27	7	13	17	84	139	156	0h>24h
Slc27a3	901.528	1.20816	0.178486	6.76892	1.29747e-11	3.69304e-10	1369	1191	1387	1076	1460	1086	381	603	652	24h>0h
Cd2	55.0106	-2.97399	0.439609	-6.76509	1.33229e-11	3.78738e-10	20	10	9	8	12	15	60	103	132	0h>24h
Flnc	1749.16	-1.20053	0.177498	-6.76366	1.34544e-11	3.81997e-10	1153	1017	1155	1056	1400	1134	1729	2588	3001	0h>24h
Anxa3	114.363	1.66946	0.24685	6.76307	1.35094e-11	3.83077e-10	181	154	212	330	316	331	44	59	60	24h>0h
Prkar2b	1282.4	0.94855	0.1404	6.75607	1.41789e-11	4.01557e-10	1721	1637	1938	1426	1732	1554	786	959	848	24h>0h
Klhl22	573.354	-1.09085	0.161491	-6.75485	1.42979e-11	4.04421e-10	416	330	404	375	460	347	615	858	857	0h>24h
Cebpa	314.984	2.12083	0.314091	6.7523	1.45524e-11	4.11106e-10	547	467	595	382	463	340	58	117	183	24h>0h
Rpap3	1215.37	-1.00113	0.148393	-6.74644	1.51516e-11	4.27497e-10	881	807	847	852	1157	887	1517	1740	1529	0h>24h
Rps6kb2	336.674	-1.31916	0.195549	-6.74591	1.52067e-11	4.28517e-10	189	216	197	210	246	177	357	574	510	0h>24h
Map3k9	2167.98	1.07569	0.159493	6.74444	1.53616e-11	4.32344e-10	3392	2923	2889	3311	4562	3191	1047	1578	1553	24h>0h
Rnf122	370.566	-1.39573	0.206989	-6.74303	1.55122e-11	4.3604e-10	200	214	225	160	244	193	376	572	665	0h>24h
Skap2	1343.75	0.992114	0.147177	6.74094	1.57366e-11	4.41798e-10	1853	1654	2107	1866	2319	1968	723	953	1004	24h>0h
Adcy5	873.635	-1.15263	0.171028	-6.7394	1.59042e-11	4.45948e-10	604	555	537	407	495	424	903	1279	1425	0h>24h
H2afy	1762.33	-0.887108	0.131719	-6.73485	1.64096e-11	4.59353e-10	1268	1251	1354	879	1141	733	1914	2348	2539	0h>24h
Tmem119	74.2725	2.20269	0.327064	6.73474	1.64229e-11	4.59353e-10	124	111	149	144	187	121	15	36	29	24h>0h
Rgp1	832.029	-1.00963	0.149923	-6.73433	1.64687e-11	4.60066e-10	608	574	545	517	624	467	894	1240	1182	0h>24h
Pdha1	1088.15	-0.952491	0.141447	-6.7339	1.65173e-11	4.6046e-10	768	725	831	950	1123	1000	1124	1593	1569	0h>24h
Pik3r6	73.5024	2.29645	0.34103	6.73385	1.65236e-11	4.6046e-10	121	104	160	110	140	116	14	31	30	24h>0h
Fgl1	101.767	-1.91702	0.284732	-6.73271	1.66532e-11	4.63499e-10	51	36	47	48	49	41	108	190	187	0h>24h
Nim1k	34.3798	-3.53996	0.525861	-6.73175	1.67638e-11	4.66005e-10	7	7	3	9	6	11	44	62	84	0h>24h
Slc24a4	34.4454	3.39832	0.505055	6.72862	1.71281e-11	4.75546e-10	72	56	70	82	108	93	2	7	9	24h>0h
Hid1	408.249	-1.16309	0.172933	-6.72567	1.74785e-11	4.84681e-10	255	281	251	146	170	111	493	572	608	0h>24h
Tcf15	2237.4	-1.62927	0.24227	-6.72502	1.7557e-11	4.8626e-10	1251	921	1265	808	1025	610	2119	3416	4674	0h>24h
Ifi27	1653.24	1.42671	0.212275	6.72105	1.80421e-11	4.99084e-10	2513	2138	2923	1085	1430	1103	606	915	1175	24h>0h
Slc43a2	549.816	-1.23438	0.183842	-6.71437	1.88883e-11	5.21853e-10	349	333	345	317	372	317	548	851	918	0h>24h
Apold1	35.3217	-3.87367	0.577131	-6.71193	1.92064e-11	5.29993e-10	2	9	3	1	9	3	51	89	58	0h>24h
Map2	127.297	2.80642	0.418214	6.7105	1.93963e-11	5.3458e-10	169	234	294	351	325	334	47	27	17	24h>0h
Bcam	108.747	1.7753	0.264618	6.7089	1.961e-11	5.39811e-10	165	155	209	104	131	114	36	51	60	24h>0h
Eng	303.609	-1.45411	0.216886	-6.70449	2.02118e-11	5.55701e-10	157	149	204	196	217	202	344	431	553	0h>24h
Mpzl1	2881.9	-0.924866	0.137965	-6.70364	2.0329e-11	5.58245e-10	2116	1922	2195	1669	2108	1803	2940	4049	4288	0h>24h
Samd4	359.613	-1.19585	0.178396	-6.70335	2.03693e-11	5.58672e-10	233	238	212	263	292	256	395	571	529	0h>24h
Rcsd1	253.736	-2.24156	0.335005	-6.69112	2.21463e-11	6.06674e-10	105	57	118	54	64	70	222	530	525	0h>24h
Timp1	593.72	1.674	0.250693	6.6775	2.43048e-11	6.64999e-10	854	833	1154	913	811	920	187	268	397	24h>0h
Ror2	333.889	-1.28179	0.192006	-6.67578	2.45917e-11	6.71223e-10	200	180	231	134	187	159	359	493	563	0h>24h
Adcyap1r1	346.913	1.23491	0.184983	6.6758	2.4588e-11	6.71223e-10	575	475	475	459	600	412	160	233	225	24h>0h
Armt1	819.097	-0.913156	0.136848	-6.67276	2.51043e-11	6.84388e-10	576	575	628	595	780	623	936	1127	1110	0h>24h
Cmip	2577.39	-1.02837	0.154137	-6.67178	2.52718e-11	6.88123e-10	1925	1748	1629	1679	2249	1764	2915	3442	3918	0h>24h
Kif21a	377.738	-1.90041	0.285113	-6.66545	2.63848e-11	7.17565e-10	160	135	207	159	182	133	607	748	397	0h>24h
Mad2l2	360.728	1.20264	0.180484	6.6634	2.67567e-11	7.26805e-10	535	488	554	364	471	441	161	235	258	24h>0h
Itga6	2532.7	-1.12416	0.168991	-6.6522	2.88751e-11	7.83406e-10	1615	1607	1766	1071	1311	1210	3422	3754	3039	0h>24h
Arx	27.2251	4.08979	0.614963	6.65047	2.92153e-11	7.91686e-10	50	54	57	85	58	63	2	3	4	24h>0h
Greb1l	156.575	1.73424	0.261086	6.64241	3.08594e-11	8.35238e-10	263	250	239	336	369	394	79	78	55	24h>0h
Dchs1	287.608	1.28967	0.194188	6.64133	3.10869e-11	8.40386e-10	498	383	398	493	623	467	142	173	181	24h>0h
Fendrr	54.0761	-2.2199	0.334303	-6.64039	3.12851e-11	8.44736e-10	23	16	21	34	9	23	74	95	96	0h>24h
Prss50	269.058	-1.55087	0.233807	-6.63311	3.28685e-11	8.86429e-10	158	110	163	112	120	106	279	436	491	0h>24h
Trac	32.8713	-3.1333	0.472413	-6.63254	3.29968e-11	8.8883e-10	6	8	7	12	19	13	55	55	64	0h>24h
2310003H01Rik	783.867	1.02891	0.155189	6.63006	3.35551e-11	9.02792e-10	1165	994	1140	1143	1404	1135	415	523	598	24h>0h
Tril	131.226	-1.8978	0.286261	-6.6296	3.3659e-11	9.04511e-10	45	59	70	99	113	100	153	196	270	0h>24h
Gm6976	28.4879	-4.06729	0.613632	-6.62822	3.39757e-11	9.11938e-10	3	4	3	4	1	6	58	57	42	0h>24h
Sod3	58.5399	2.1529	0.325255	6.61911	3.61372e-11	9.68802e-10	91	103	105	105	136	114	17	23	24	24h>0h
Ly6g6e	82.0279	2.03486	0.307479	6.61786	3.64424e-11	9.75828e-10	118	144	150	82	108	102	32	38	25	24h>0h
Zdhhc14	441.866	-1.29756	0.196164	-6.61468	3.72355e-11	9.95884e-10	271	274	254	212	253	239	452	668	764	0h>24h
Ankrd13d	552.981	-1.08613	0.164235	-6.61327	3.75914e-11	1.00421e-09	362	349	399	243	251	248	578	800	869	0h>24h
Cfap126	39.0666	-2.78528	0.421769	-6.6038	4.00751e-11	1.0693e-09	11	11	9	4	9	9	48	78	79	0h>24h
Ntn1	1114.28	-1.12233	0.170013	-6.60142	4.07243e-11	1.08534e-09	789	689	719	566	734	559	1122	1635	1819	0h>24h
Rrm2	2059.09	-0.849374	0.128784	-6.59533	4.24306e-11	1.12948e-09	1593	1511	1494	1145	1642	1430	2230	2921	2725	0h>24h
Gng7	164.98	1.59082	0.241267	6.59358	4.2934e-11	1.14154e-09	308	242	225	183	254	176	73	96	75	24h>0h
Selplg	31.1581	-4.06416	0.616468	-6.59265	4.32041e-11	1.14737e-09	3	5	3	2	3	0	31	69	79	0h>24h
Upb1	59.8923	-2.68649	0.407524	-6.59223	4.33267e-11	1.14928e-09	10	25	15	11	13	9	94	126	87	0h>24h
Syngr2	1186.79	-1.10888	0.168252	-6.59058	4.38109e-11	1.16076e-09	744	697	920	408	562	398	1234	1755	1862	0h>24h
Mras	114.931	1.91847	0.291269	6.58659	4.50049e-11	1.191e-09	161	179	231	148	195	118	29	59	57	24h>0h
Ccdc42	27.4264	8.19888	1.24561	6.5822	4.63529e-11	1.22523e-09	63	51	58	35	54	36	0	0	0	24h>0h
Tpm2	218.72	1.96351	0.298646	6.5747	4.875e-11	1.28709e-09	276	383	430	507	498	513	78	65	121	24h>0h
Fam3c	438.579	-1.14826	0.174748	-6.57096	4.99923e-11	1.31835e-09	273	252	331	382	464	328	526	693	576	0h>24h
Gpr156	45.839	-2.71417	0.413252	-6.56784	5.10488e-11	1.34464e-09	15	9	14	17	39	18	87	76	69	0h>24h
Svep1	36.0169	3.22264	0.490895	6.56483	5.2092e-11	1.37052e-09	67	78	58	177	230	223	3	10	8	24h>0h
Hhex	636.237	-1.02174	0.15573	-6.56099	5.34535e-11	1.40471e-09	430	416	470	434	557	469	654	961	935	0h>24h
Lemd1	95.0077	-2.06142	0.314659	-6.55127	5.70496e-11	1.49747e-09	41	23	52	38	31	29	117	175	167	0h>24h
Vsig10l	102.396	1.64856	0.251893	6.54468	5.96211e-11	1.56315e-09	152	171	162	74	122	85	43	55	49	24h>0h
RP23-404J7.10	39.0983	-4.02988	0.615945	-6.54259	6.04613e-11	1.58334e-09	2	9	3	10	0	5	36	91	98	0h>24h
Rab36	237.504	1.34041	0.205165	6.53333	6.43247e-11	1.68257e-09	378	335	353	388	461	413	125	158	115	24h>0h
Ptx3	38.6641	2.88212	0.441166	6.53296	6.44826e-11	1.68475e-09	70	65	78	155	209	116	12	8	7	24h>0h
Emp1	441.249	1.28446	0.197023	6.51933	7.06243e-11	1.84308e-09	534	661	764	643	704	756	216	289	259	24h>0h
Jup	1050.78	-1.11694	0.171411	-6.51619	7.21133e-11	1.87977e-09	729	711	632	548	678	539	1103	1514	1682	0h>24h
Zfp462	1771.05	-1.30997	0.201041	-6.51593	7.22427e-11	1.88097e-09	1104	1016	1067	1346	1647	1520	2433	3043	1971	0h>24h
Tnfrsf26	78.9673	-2.36318	0.362791	-6.51389	7.32288e-11	1.90445e-09	22	18	41	31	44	36	132	113	143	0h>24h
Fgf18	51.5046	-2.87995	0.442308	-6.51117	7.45654e-11	1.93699e-09	16	5	18	21	18	16	62	97	114	0h>24h
Gpc6	116.305	1.79518	0.275752	6.51014	7.50799e-11	1.94811e-09	178	219	165	239	235	296	48	60	46	24h>0h
Gnl3l	1163.75	-0.89921	0.138192	-6.50695	7.66915e-11	1.98765e-09	887	800	857	923	1139	978	1354	1669	1466	0h>24h
Tox3	336.269	1.30504	0.200624	6.50487	7.77583e-11	2.01299e-09	483	534	477	395	456	473	185	217	170	24h>0h
Tpst2	1176.61	-1.05384	0.162055	-6.50298	7.87436e-11	2.0356e-09	800	733	866	732	1020	812	1210	1641	1897	0h>24h
Elfn2	65.4989	-2.17604	0.334628	-6.50285	7.88119e-11	2.0356e-09	19	30	25	18	29	19	96	98	123	0h>24h
Sec14l2	168.578	1.55656	0.239457	6.50037	8.01228e-11	2.06709e-09	280	223	288	191	227	147	57	94	106	24h>0h
Rnpepl1	91.8873	1.94271	0.299076	6.4957	8.26476e-11	2.1298e-09	126	156	175	112	104	125	25	49	40	24h>0h
Dpf1	931.078	-1.27383	0.19611	-6.49547	8.27736e-11	2.13062e-09	658	494	557	304	367	262	941	1390	1622	0h>24h
Meox1	31.1471	-3.70256	0.570245	-6.49294	8.41785e-11	2.1594e-09	6	3	5	1	2	1	32	71	73	0h>24h
Nefl	78.7899	-2.35404	0.362548	-6.49303	8.41269e-11	2.1594e-09	25	38	17	12	24	24	103	165	126	0h>24h
Trnp1	440.735	1.92049	0.295769	6.49323	8.40175e-11	2.1594e-09	775	649	764	634	824	633	97	180	282	24h>0h
Dnmt3b	3967.12	0.933494	0.143813	6.49101	8.52623e-11	2.18473e-09	5734	5009	5577	3544	4323	3602	2187	2750	3188	24h>0h
Snx19	603.356	0.970349	0.149545	6.48867	8.65957e-11	2.21638e-09	844	774	886	560	810	711	346	410	455	24h>0h
Dusp8	165.479	1.6885	0.260393	6.48443	8.9065e-11	2.277e-09	261	278	249	424	535	407	79	60	91	24h>0h
Hk2	5531	-1.02618	0.158301	-6.48244	9.02501e-11	2.30469e-09	3841	3512	4067	1957	2764	1996	5362	8249	8652	0h>24h
Chrd	205.31	-1.35553	0.209158	-6.48091	9.11713e-11	2.32559e-09	129	120	112	48	45	30	227	308	347	0h>24h
Eno1	21255.2	-1.15468	0.178263	-6.47735	9.33454e-11	2.37836e-09	13151	12090	16139	8682	9985	9604	22960	28294	36249	0h>24h
Gpr176	76.704	1.86703	0.288253	6.47706	9.35276e-11	2.38032e-09	113	124	140	185	171	155	28	32	38	24h>0h
Lrp11	597.369	-0.976104	0.150738	-6.47548	9.45084e-11	2.40257e-09	437	375	451	280	386	331	667	813	874	0h>24h
Cacnb4	217.398	-2.4638	0.380735	-6.47117	9.72465e-11	2.46941e-09	72	75	61	82	67	107	485	374	196	0h>24h
Rpl39	1878.31	-1.99645	0.308542	-6.47061	9.76113e-11	2.47589e-09	730	637	1003	641	715	764	1427	4217	3562	0h>24h
Fads6	121.118	1.51966	0.234872	6.47013	9.79165e-11	2.48084e-09	193	165	206	143	179	144	48	68	71	24h>0h
Cldn11	32.542	3.48693	0.539247	6.4663	1.00429e-10	2.54166e-09	48	57	83	109	70	71	3	8	5	24h>0h
Fgf13	352.652	1.2982	0.200828	6.46425	1.018e-10	2.57347e-09	541	542	484	527	733	652	143	234	235	24h>0h
Tnfrsf19	377.886	-1.10254	0.17065	-6.46085	1.04119e-10	2.62914e-09	259	212	283	241	276	213	458	545	525	0h>24h
Atoh8	328.278	1.56062	0.241644	6.45836	1.05842e-10	2.66968e-09	511	464	564	513	625	630	104	170	227	24h>0h
Aifm2	928.643	0.914274	0.141898	6.44319	1.16988e-10	2.94753e-09	1295	1183	1325	1109	1317	1054	503	718	702	24h>0h
Acat2	2864.37	-0.882296	0.136955	-6.44224	1.17726e-10	2.96282e-09	2170	1875	2276	1779	2066	1739	3114	3751	4173	0h>24h
Cntnap1	129.769	-1.43085	0.222268	-6.43752	1.21443e-10	3.05297e-09	77	66	77	22	39	38	172	194	194	0h>24h
Lrp1	5326.2	-1.06681	0.165817	-6.43369	1.24541e-10	3.12736e-09	3958	3648	3145	3505	4481	3247	5618	7879	8045	0h>24h
Klk8	470.831	-1.17642	0.182946	-6.43043	1.27247e-10	3.19177e-09	330	243	335	162	228	222	524	674	748	0h>24h
Pcbp3	677.66	-1.00125	0.155733	-6.42926	1.28228e-10	3.21282e-09	509	453	451	444	525	514	775	1035	876	0h>24h
Il1rl1	68.8635	-2.57764	0.40114	-6.4258	1.31179e-10	3.28311e-09	12	19	31	17	17	11	126	127	92	0h>24h
Fras1	458.486	1.40291	0.218374	6.42435	1.32432e-10	3.31081e-09	830	655	596	712	968	755	231	299	215	24h>0h
Tpcn2	320.434	1.08014	0.16832	6.41716	1.38841e-10	3.46718e-09	488	431	443	322	422	372	177	219	215	24h>0h
Pced1b	304.178	-1.36668	0.213011	-6.41603	1.39875e-10	3.48916e-09	179	190	162	181	242	171	311	482	523	0h>24h
A930011G23Rik	62.523	-2.36154	0.368119	-6.41515	1.40686e-10	3.50552e-09	16	18	30	12	17	13	91	89	130	0h>24h
Vash2	724.858	-0.930215	0.145174	-6.4076	1.47824e-10	3.67932e-09	511	492	560	243	289	283	856	959	998	0h>24h
Mink1	4039.41	-1.0226	0.159596	-6.40741	1.48009e-10	3.67986e-09	3073	2620	2650	2943	3834	2862	4012	6094	6120	0h>24h
Pcsk5	141.893	1.41799	0.221674	6.39675	1.58719e-10	3.94181e-09	214	190	244	170	187	189	69	77	83	24h>0h
Adgrb2	1500.29	-1.23965	0.193894	-6.39346	1.62172e-10	4.02315e-09	1005	873	918	497	598	469	1432	2271	2640	0h>24h
Fam114a1	117.718	1.47957	0.231524	6.39059	1.6525e-10	4.09501e-09	172	174	197	299	289	270	51	70	64	24h>0h
Syde1	45.8497	2.72778	0.426933	6.38924	1.66711e-10	4.12669e-09	60	83	107	130	121	113	8	13	15	24h>0h
Arid3b	1907.53	-0.84934	0.133183	-6.37722	1.80331e-10	4.45658e-09	1468	1419	1371	1219	1629	1336	2075	2570	2645	0h>24h
Cbln2	28.6746	-4.43658	0.695719	-6.37697	1.80626e-10	4.45658e-09	5	0	3	3	2	0	36	80	50	0h>24h
Gpr142	24.713	-8.1348	1.27565	-6.37697	1.80629e-10	4.45658e-09	0	0	0	5	0	0	28	54	68	0h>24h
Zhx2	80.703	-1.95987	0.307585	-6.37181	1.86807e-10	4.60397e-09	31	25	48	27	35	31	104	142	137	0h>24h
Mmp25	42.1917	-2.48307	0.389728	-6.3713	1.87435e-10	4.61441e-09	16	13	11	10	11	5	68	73	70	0h>24h
Sox18	169.37	-2.0183	0.317178	-6.36328	1.97485e-10	4.85655e-09	93	50	68	45	56	56	193	236	385	0h>24h
Sfrp5	48.0349	-2.54366	0.399854	-6.36148	1.99821e-10	4.90864e-09	21	13	10	7	13	8	71	76	96	0h>24h
Fbxl12	843.876	-1.31176	0.206213	-6.36119	2.00195e-10	4.91251e-09	577	457	485	359	419	354	815	1306	1500	0h>24h
Phf21a	1282.41	-0.965601	0.151815	-6.36037	2.01268e-10	4.93346e-09	868	937	910	817	965	894	1398	1998	1659	0h>24h
Fam105a	239.049	-1.1924	0.187513	-6.35902	2.03041e-10	4.97154e-09	154	130	173	168	180	158	275	355	360	0h>24h
Grin2d	237.165	1.59927	0.251649	6.35516	2.08206e-10	5.09248e-09	337	385	394	250	348	300	72	127	156	24h>0h
Fam81a	399.8	-1.00328	0.158005	-6.34968	2.15768e-10	5.27175e-09	273	260	301	154	182	161	456	550	578	0h>24h
Slc6a2	37.5592	2.86216	0.450782	6.34932	2.16263e-10	5.27812e-09	66	65	76	92	124	98	7	6	14	24h>0h
Fads2	1983.59	-0.937664	0.147811	-6.34369	2.2433e-10	5.4691e-09	1480	1288	1499	1192	1368	1257	2038	2706	3037	0h>24h
Cdkn1b	232.395	-1.56007	0.246058	-6.34026	2.29383e-10	5.58626e-09	93	119	157	144	239	164	330	379	315	0h>24h
Bahcc1	3868.79	1.23401	0.194687	6.33841	2.32145e-10	5.64744e-09	6627	5626	4708	6806	9608	6293	1696	2680	2547	24h>0h
Has2	39.9436	7.77218	1.22635	6.33763	2.33329e-10	5.67014e-09	79	80	90	68	67	77	1	0	0	24h>0h
Atp2b4	1490.46	-1.00549	0.159007	-6.32356	2.55612e-10	6.20498e-09	1144	977	981	992	1210	1002	1884	2096	1889	0h>24h
Mgst1	76.0336	2.76936	0.438284	6.31865	2.63863e-10	6.39841e-09	83	125	209	195	195	236	22	22	13	24h>0h
Foxp4	1154.38	-1.57731	0.249646	-6.31818	2.64664e-10	6.41095e-09	713	564	537	360	459	373	1003	2132	2115	0h>24h
Actg2	26.3479	5.25412	0.831931	6.31557	2.69162e-10	6.51292e-09	44	52	65	218	244	200	1	1	2	24h>0h
Fam214a	626.418	1.2263	0.19419	6.31497	2.70205e-10	6.53116e-09	1022	868	856	1100	1308	1129	372	410	322	24h>0h
Foxl1	37.2208	-6.8524	1.08607	-6.30934	2.80225e-10	6.76612e-09	1	1	0	1	0	3	54	73	94	0h>24h
Lrp10	2646.58	-1.13613	0.180083	-6.30894	2.80952e-10	6.77643e-09	1817	1674	1689	1411	1928	1501	2554	3886	4488	0h>24h
Rnf14	1687.81	-1.21824	0.19319	-6.30594	2.86448e-10	6.90163e-09	1043	1030	1103	1054	1178	1089	2521	2248	2124	0h>24h
Inpp4a	509.464	-1.00606	0.159754	-6.29757	3.02349e-10	7.27697e-09	377	325	359	308	363	317	623	740	649	0h>24h
Def6	245.584	-1.83394	0.291249	-6.29681	3.03828e-10	7.3048e-09	97	126	113	66	81	65	223	406	533	0h>24h
Epg5	468.124	-1.19284	0.189462	-6.29592	3.05577e-10	7.33904e-09	317	302	271	449	528	429	625	709	586	0h>24h
Rabepk	493.887	-1.28394	0.203946	-6.29552	3.06373e-10	7.35036e-09	319	248	337	217	321	283	485	788	833	0h>24h
6030419C18Rik	237.791	1.32714	0.210823	6.29505	3.07308e-10	7.36497e-09	338	371	354	242	368	304	101	137	167	24h>0h
Spock1	88.1819	-1.67143	0.265638	-6.29215	3.13107e-10	7.49599e-09	49	39	44	34	59	43	121	130	146	0h>24h
Aard	65.7225	2.66141	0.423306	6.2872	3.23249e-10	7.7306e-09	101	84	174	116	163	112	12	28	14	24h>0h
Oas1a	389.686	1.49195	0.237434	6.28364	3.30747e-10	7.90156e-09	622	467	722	213	243	216	136	218	261	24h>0h
S1pr3	209.555	1.2567	0.200012	6.28313	3.31814e-10	7.9187e-09	341	297	286	250	273	324	112	127	127	24h>0h
Ednra	60.4273	2.10176	0.334558	6.28219	3.33832e-10	7.95844e-09	92	105	109	116	100	98	25	20	22	24h>0h
Smoc1	1756.05	0.951533	0.151521	6.27989	3.38823e-10	8.06218e-09	2585	2341	2318	1539	2093	1496	923	1284	1370	24h>0h
Usp3	3003.81	-0.850916	0.135499	-6.27985	3.38897e-10	8.06218e-09	2168	2181	2359	1824	2379	2296	3496	3806	4125	0h>24h
Crtac1	270.782	-1.5354	0.244656	-6.27575	3.47961e-10	8.26912e-09	154	116	167	98	119	75	277	404	529	0h>24h
Rpl17	9012.94	-0.966616	0.154103	-6.27253	3.55235e-10	8.43311e-09	6056	5496	7621	7602	9702	8677	9784	12670	13052	0h>24h
Postn	496.757	2.39035	0.381203	6.27055	3.59765e-10	8.53168e-09	603	1037	959	2676	2086	2968	228	121	103	24h>0h
Aldoc	1822.44	-1.38171	0.220658	-6.26179	3.80586e-10	8.99712e-09	1029	954	1189	860	958	856	1628	2961	3377	0h>24h
Zfp831	93.5591	-1.75671	0.28053	-6.26211	3.79807e-10	8.99712e-09	39	42	53	46	44	43	122	180	128	0h>24h
Prelid2	143.998	-1.49942	0.239451	-6.26193	3.80254e-10	8.99712e-09	67	72	97	60	37	44	193	206	230	0h>24h
Ddit4	3116.82	-1.74581	0.278856	-6.26063	3.83436e-10	9.05503e-09	1365	1296	1839	491	640	413	2524	5463	6636	0h>24h
Chd7	1703.65	-1.2436	0.19875	-6.25712	3.9215e-10	9.25113e-09	1160	1041	962	985	1199	887	2102	3032	1984	0h>24h
Sri	108.526	1.63251	0.260943	6.25621	3.94441e-10	9.29548e-09	163	147	206	285	288	250	42	65	51	24h>0h
Unc45b	40.5555	-2.88755	0.462475	-6.2437	4.27353e-10	1.00606e-08	6	14	10	6	6	11	78	63	67	0h>24h
Trim62	276.479	1.2106	0.19409	6.23732	4.45137e-10	1.04684e-08	432	390	387	327	418	288	121	196	183	24h>0h
Dppa2	54.3731	-2.16863	0.347786	-6.23553	4.50261e-10	1.05779e-08	23	19	20	40	59	50	75	113	77	0h>24h
Sh3rf3	94.7668	1.63293	0.261909	6.23471	4.5261e-10	1.0611e-08	151	156	141	201	216	169	35	54	49	24h>0h
Npnt	204.376	1.2274	0.196864	6.23474	4.52532e-10	1.0611e-08	299	293	304	282	329	291	110	116	136	24h>0h
Pde1b	173.568	1.38776	0.222622	6.23368	4.55612e-10	1.06703e-08	269	247	271	241	303	257	75	90	121	24h>0h
Sobp	70.9215	1.90928	0.306304	6.23328	4.56767e-10	1.06863e-08	108	126	116	110	155	106	22	30	37	24h>0h
Card6	225.92	-1.25328	0.201254	-6.22734	4.74425e-10	1.10879e-08	142	149	126	119	141	152	263	369	316	0h>24h
Clstn1	10025.2	-0.989666	0.158933	-6.22694	4.75632e-10	1.11046e-08	7347	6632	7051	6567	8743	6538	9817	14136	16001	0h>24h
Mdfic	69.9204	2.11875	0.340328	6.22562	4.79663e-10	1.11872e-08	87	123	146	112	117	134	21	31	26	24h>0h
Ap5b1	371.837	1.28254	0.206112	6.22252	4.89233e-10	1.13986e-08	591	544	514	870	1265	969	146	263	243	24h>0h
Sptbn2	5101.29	-1.11973	0.180033	-6.2196	4.98408e-10	1.16004e-08	3732	3040	3305	2649	3526	2466	5001	7325	8638	0h>24h
Dalrd3	300.066	-1.17825	0.189646	-6.2129	5.2015e-10	1.2094e-08	222	176	178	92	123	115	349	422	466	0h>24h
Plp2	805.443	-1.09959	0.177079	-6.20957	5.31313e-10	1.23409e-08	475	551	577	532	595	676	935	1043	1281	0h>24h
Penk	156.584	1.3885	0.223985	6.19906	5.6801e-10	1.31797e-08	233	208	271	166	173	163	65	105	89	24h>0h
Daam2	282.691	-1.09805	0.177183	-6.19723	5.74641e-10	1.33199e-08	190	164	211	249	247	218	331	429	385	0h>24h
Lox	1857.26	2.08559	0.336614	6.19581	5.79866e-10	1.34272e-08	2506	3696	3161	6410	6221	7121	962	596	463	24h>0h
Tsc22d1	2883.69	0.7302	0.117902	6.19329	5.89221e-10	1.36299e-08	3799	3507	3970	4061	5063	4445	1828	2337	2284	24h>0h
Adgrl3	233.181	-1.58943	0.256873	-6.18762	6.1078e-10	1.41141e-08	97	147	118	118	138	119	358	354	314	0h>24h
Ehmt2	12629.9	1.32358	0.213967	6.18591	6.17458e-10	1.42539e-08	19990	16876	19739	20612	26208	20731	4529	7808	9446	24h>0h
Gjb3	99.4456	-1.75206	0.283305	-6.18438	6.23488e-10	1.43784e-08	51	41	51	31	23	33	109	153	198	0h>24h
Itpk1	1512.89	0.992934	0.160562	6.18411	6.24534e-10	1.43878e-08	2186	1873	2260	1528	1856	1609	745	1110	1177	24h>0h
Tmem52	27.1504	3.50108	0.56622	6.18324	6.27976e-10	1.44524e-08	51	40	66	21	31	29	5	4	4	24h>0h
Tmem173	285.965	-1.36605	0.221205	-6.17551	6.59498e-10	1.5147e-08	154	163	184	107	167	123	286	432	520	0h>24h
Hbb-bs	22.1507	7.89194	1.27792	6.17562	6.59023e-10	1.5147e-08	50	30	60	2	2	0	0	0	0	24h>0h
Midn	4821.06	-1.18649	0.192266	-6.17108	6.78252e-10	1.55619e-08	3378	2987	2841	1994	2739	2005	4620	7174	8348	0h>24h
Klhl5	325.57	-1.06962	0.173355	-6.17015	6.82241e-10	1.56376e-08	217	196	246	307	355	313	397	443	465	0h>24h
Ppp1r16b	620.804	-1.19813	0.194223	-6.16883	6.87968e-10	1.57407e-08	444	383	352	296	371	263	618	1030	950	0h>24h
Kcnip3	398.117	1.19115	0.193093	6.16879	6.88131e-10	1.57407e-08	553	600	578	408	528	392	181	246	298	24h>0h
Slc39a13	846.138	-1.17851	0.191148	-6.16544	7.02877e-10	1.60617e-08	555	542	525	387	533	440	811	1281	1437	0h>24h
Map2k6	49.7879	-2.13347	0.346257	-6.16152	7.20501e-10	1.64478e-08	19	18	21	17	24	20	60	91	92	0h>24h
Atp9b	1068.82	-0.875451	0.142099	-6.16084	7.23585e-10	1.65015e-08	854	753	753	771	1179	936	1217	1486	1399	0h>24h
Islr	37.763	2.48499	0.403384	6.16035	7.25841e-10	1.65363e-08	72	59	70	109	150	132	10	13	11	24h>0h
B3gnt7	391.201	1.19486	0.193992	6.15933	7.30546e-10	1.66267e-08	642	524	540	342	417	315	179	244	288	24h>0h
Slc25a5	2085.37	-1.26361	0.205378	-6.15262	7.62139e-10	1.73283e-08	1248	1094	1512	1031	1182	1038	1988	3163	3712	0h>24h
Kdm4b	638.286	-1.00742	0.163798	-6.15041	7.72841e-10	1.7554e-08	434	421	474	416	516	366	637	944	972	0h>24h
Pomp	1942.42	-1.12392	0.182869	-6.14604	7.9443e-10	1.80262e-08	1296	1054	1492	917	1240	874	1925	2934	3131	0h>24h
Slc38a3	254.582	-1.63607	0.266244	-6.14501	7.99594e-10	1.81252e-08	156	110	123	59	93	84	246	397	519	0h>24h
Mycl	665.51	1.18674	0.193263	6.14052	8.22528e-10	1.86264e-08	957	921	1019	721	968	765	313	376	523	24h>0h
5930412G12Rik	80.4277	-1.81557	0.295738	-6.13911	8.29855e-10	1.87735e-08	43	28	41	43	47	40	92	152	132	0h>24h
Tcf21	21.2283	7.83045	1.27619	6.13579	8.47356e-10	1.91502e-08	50	30	54	79	71	72	0	0	0	24h>0h
Sh3glb2	1719.19	-0.982454	0.160227	-6.13164	8.69802e-10	1.96215e-08	1266	1117	1238	914	1160	868	1698	2423	2715	0h>24h
Spryd4	159.797	-1.44213	0.235195	-6.13161	8.69945e-10	1.96215e-08	83	80	107	82	93	82	179	235	284	0h>24h
Uncx	273.647	-1.77076	0.289315	-6.12053	9.32641e-10	2.10146e-08	115	137	136	113	161	129	228	504	556	0h>24h
Gabrd	25.7542	4.20475	0.687166	6.11897	9.41838e-10	2.12007e-08	46	54	53	42	41	48	0	2	6	24h>0h
Rbm20	107.018	-1.77449	0.29005	-6.11789	9.48233e-10	2.13235e-08	62	43	47	31	34	29	110	184	205	0h>24h
Mxd4	1737.73	1.00667	0.164584	6.11645	9.56839e-10	2.14956e-08	2526	2188	2564	1803	2189	1743	848	1226	1386	24h>0h
Cnnm1	262.99	-1.23755	0.202426	-6.1136	9.74057e-10	2.18607e-08	171	161	158	153	252	134	323	448	326	0h>24h
Stra6	23.7051	3.8765	0.63447	6.10983	9.9739e-10	2.23621e-08	47	45	47	54	63	44	2	2	5	24h>0h
Tmem191c	96.2335	1.74213	0.285148	6.10958	9.98947e-10	2.23748e-08	169	140	156	108	104	108	31	62	40	24h>0h
Glyatl3	24.9484	-5.23555	0.857013	-6.10906	1.00218e-09	2.24251e-08	0	4	0	0	1	2	43	56	45	0h>24h
Gldc	622.846	-0.992364	0.16245	-6.10874	1.0042e-09	2.2448e-08	449	395	463	606	781	615	626	910	945	0h>24h
Tacc1	892.661	-0.919807	0.150621	-6.10675	1.01678e-09	2.27067e-08	600	612	723	473	567	494	975	1338	1164	0h>24h
Efcab6	89.9091	-1.63037	0.267016	-6.10588	1.02235e-09	2.28087e-08	41	52	44	49	41	61	119	148	136	0h>24h
Gnai1	274.412	1.26296	0.206963	6.10234	1.04529e-09	2.32973e-08	410	355	450	442	568	450	166	162	146	24h>0h
Itpr3	6446.73	-0.92957	0.152356	-6.10128	1.0522e-09	2.34195e-08	4988	4485	4415	2887	3644	2901	6405	9176	9717	0h>24h
Gm9581	155.233	2.31272	0.379061	6.10119	1.05284e-09	2.34195e-08	283	270	254	447	460	389	69	57	24	24h>0h
Bcl6	93.6408	1.69629	0.278174	6.09797	1.07426e-09	2.38725e-08	139	169	138	134	160	142	39	51	41	24h>0h
Polr3e	1485.41	0.907935	0.148941	6.09592	1.08807e-09	2.41557e-08	2065	1917	2089	2204	2762	2344	777	1131	1183	24h>0h
Usp18	164.01	1.41008	0.231393	6.0939	1.10193e-09	2.44392e-08	266	207	276	214	253	183	72	85	110	24h>0h
Foxj1	123.077	-2.02945	0.333235	-6.09014	1.12809e-09	2.49949e-08	50	34	69	29	32	20	116	241	243	0h>24h
Rbks	90.1898	1.68666	0.277064	6.08764	1.1459e-09	2.53647e-08	130	136	165	98	93	91	42	38	46	24h>0h
Bcat1	61.4276	2.10066	0.345334	6.083	1.17957e-09	2.6059e-08	79	106	127	96	76	101	20	26	23	24h>0h
Ptgs2	122.004	2.72877	0.44858	6.08312	1.17863e-09	2.6059e-08	159	225	280	231	227	241	35	48	11	24h>0h
Jak3	70.7792	1.91867	0.315425	6.08282	1.18086e-09	2.60619e-08	131	115	104	63	83	64	24	26	38	24h>0h
Zfp771	208.847	1.3931	0.229067	6.0816	1.18989e-09	2.62356e-08	346	303	298	185	281	268	86	109	149	24h>0h
AI413582	450.126	-1.55975	0.257162	-6.06525	1.31746e-09	2.90201e-08	239	211	266	235	276	222	385	771	884	0h>24h
Sesn1	448.643	-0.946291	0.15604	-6.06442	1.32428e-09	2.9142e-08	311	307	342	345	423	401	528	642	580	0h>24h
Stx3	359.087	-1.0301	0.169986	-6.0599	1.36209e-09	2.99448e-08	248	229	263	213	313	241	401	569	466	0h>24h
Pnliprp2	52.9196	-2.33414	0.385336	-6.05741	1.38329e-09	3.03812e-08	24	13	18	19	17	13	79	72	110	0h>24h
Plekhh3	2115.03	-1.46973	0.242816	-6.05286	1.423e-09	3.12231e-08	1203	1119	1192	651	803	595	1792	3406	4227	0h>24h
Jph1	693.673	0.958562	0.158377	6.05239	1.42709e-09	3.12825e-08	1085	833	955	884	1119	828	409	508	482	24h>0h
Met	452.453	1.63512	0.270399	6.04708	1.47498e-09	3.2301e-08	736	718	685	1234	1333	1353	247	252	144	24h>0h
Crybg3	472.991	1.73235	0.286545	6.04565	1.48808e-09	3.25563e-08	734	787	750	1084	1167	1211	256	243	137	24h>0h
Sult5a1	205.968	-1.65437	0.273867	-6.04078	1.53368e-09	3.35215e-08	90	95	127	58	66	49	188	370	389	0h>24h
Arid2	1538.65	-1.52859	0.253056	-6.04053	1.53609e-09	3.35417e-08	933	734	816	1083	1166	1051	2477	2637	1564	0h>24h
Cdk1	1230.31	-0.848446	0.140483	-6.03952	1.54577e-09	3.37205e-08	885	837	1034	943	1213	958	1342	1647	1711	0h>24h
Arl6ip5	566.092	-1.05825	0.175476	-6.03074	1.63211e-09	3.55696e-08	346	384	420	367	463	389	587	809	890	0h>24h
Idh1	1385.38	-0.923538	0.153162	-6.02983	1.64128e-09	3.57049e-08	960	954	1082	843	1207	1083	1719	1939	1694	0h>24h
Synpo	274.364	1.17471	0.194817	6.02981	1.64148e-09	3.57049e-08	357	373	463	357	425	304	131	187	185	24h>0h
Tnfrsf1a	551.938	-0.939723	0.155927	-6.0267	1.6734e-09	3.63644e-08	376	394	414	338	426	338	579	778	807	0h>24h
Gale	989.99	-1.12464	0.186676	-6.02453	1.69603e-09	3.67963e-08	638	592	723	598	704	525	997	1360	1708	0h>24h
Tmem88	127.133	-1.6397	0.272172	-6.02448	1.69654e-09	3.67963e-08	59	70	64	50	66	56	153	170	250	0h>24h
Timp2	544.952	1.28341	0.213038	6.02432	1.6982e-09	3.67971e-08	729	857	827	1628	1921	1997	274	269	397	24h>0h
Cdh22	42.2324	-2.44067	0.405266	-6.02238	1.71866e-09	3.72047e-08	12	17	12	4	4	4	54	69	90	0h>24h
Cacnb3	550.661	1.07983	0.179385	6.01965	1.74794e-09	3.77662e-08	779	684	885	779	954	755	265	372	421	24h>0h
Slc7a2	968.089	1.31451	0.218369	6.01966	1.74786e-09	3.77662e-08	1470	1413	1437	1427	1764	1775	564	654	414	24h>0h
Mrc1	29.0446	-4.88226	0.81111	-6.01923	1.75245e-09	3.78274e-08	0	1	5	0	1	4	63	71	30	0h>24h
Cmpk2	88.7085	1.7025	0.283299	6.00956	1.86023e-09	4.01157e-08	154	111	162	45	87	65	36	50	38	24h>0h
Khnyn	643.205	-0.929209	0.154628	-6.00934	1.86284e-09	4.01337e-08	484	465	436	316	407	256	680	938	897	0h>24h
Gas7	442.986	-0.991829	0.165065	-6.0087	1.87018e-09	4.02533e-08	308	266	357	335	427	325	498	643	612	0h>24h
Hspb8	90.2396	2.01722	0.335877	6.00585	1.90335e-09	4.09284e-08	135	114	207	202	179	172	37	29	39	24h>0h
Akr1cl	32.9525	7.49369	1.24793	6.0049	1.91449e-09	4.11289e-08	55	84	65	79	78	91	0	1	0	24h>0h
Txndc12	705.496	-1.09569	0.182492	-6.00405	1.92459e-09	4.13064e-08	449	411	552	413	521	428	919	895	1016	0h>24h
Scmh1	1934.51	-0.90556	0.150878	-6.00193	1.94984e-09	4.18086e-08	1391	1502	1310	1370	1936	1519	2095	2687	2723	0h>24h
Gm37179	68.6021	-1.76079	0.293813	-5.99289	2.06149e-09	4.41608e-08	35	31	32	60	60	46	80	117	120	0h>24h
Inafm2	880.729	-0.884983	0.147756	-5.98948	2.10508e-09	4.5052e-08	649	631	657	453	570	439	894	1225	1293	0h>24h
Slc41a1	1786.33	-0.941786	0.157321	-5.98641	2.14522e-09	4.58676e-08	1375	1187	1270	1089	1422	974	1734	2742	2570	0h>24h
Gm27239	31.7926	-7.52921	1.25907	-5.97997	2.23181e-09	4.76738e-08	0	0	1	3	6	2	36	69	87	0h>24h
Scn7a	102.126	-3.16698	0.530088	-5.97444	2.30879e-09	4.92717e-08	26	19	19	44	46	47	280	172	66	0h>24h
Parp10	570.346	1.20305	0.201471	5.97131	2.35356e-09	5.01796e-08	840	723	935	341	483	352	237	369	432	24h>0h
Pmm1	1539.49	1.03723	0.173945	5.96299	2.47661e-09	5.27535e-08	2225	1876	2400	1709	2003	1539	723	1108	1196	24h>0h
Zfp827	291.985	1.04723	0.175653	5.96193	2.49276e-09	5.30475e-08	424	391	418	319	458	324	147	221	201	24h>0h
Mgp	44.4067	2.52908	0.424409	5.95906	2.53688e-09	5.39355e-08	71	57	111	49	38	27	11	13	15	24h>0h
Dock6	4343.88	-0.966475	0.162211	-5.95812	2.55152e-09	5.41959e-08	3383	3146	2654	2692	3403	2924	4800	6086	6206	0h>24h
Rpl26	13679.2	-0.868252	0.145806	-5.95486	2.60301e-09	5.52376e-08	9493	9079	11823	12231	14039	15062	14739	20137	17745	0h>24h
Plxna2	79.4172	1.75275	0.294416	5.95329	2.62812e-09	5.57181e-08	151	123	109	106	121	122	31	41	36	24h>0h
Snx25	1355.27	-0.787213	0.13229	-5.95066	2.67058e-09	5.65653e-08	1076	961	1079	757	970	828	1510	1737	1838	0h>24h
Gm1141	205.258	1.27499	0.214272	5.95031	2.67636e-09	5.66347e-08	282	321	304	502	548	529	112	137	106	24h>0h
Dusp28	122.2	1.63307	0.274488	5.94952	2.68934e-09	5.68561e-08	164	190	225	80	122	103	49	51	77	24h>0h
Ldha	6146	-1.36368	0.229332	-5.94634	2.74199e-09	5.7915e-08	2995	3007	4826	2280	2463	2290	6456	9010	11059	0h>24h
Htr1d	119.595	-1.7314	0.291429	-5.94106	2.83181e-09	5.97562e-08	81	42	51	67	67	42	144	197	208	0h>24h
Erich3	31.8302	-3.23791	0.545195	-5.93899	2.86789e-09	6.04612e-08	8	8	3	11	13	5	51	79	41	0h>24h
Cenpm	367.518	1.21696	0.204959	5.93758	2.8926e-09	6.0903e-08	576	476	561	343	370	363	152	236	276	24h>0h
Ehd2	492.907	1.06072	0.178648	5.93749	2.89424e-09	6.0903e-08	676	698	710	880	956	1014	280	292	374	24h>0h
March6	2684.22	-0.726362	0.122398	-5.93443	2.94869e-09	6.19911e-08	2120	2089	2118	2150	2706	2284	2860	3536	3541	0h>24h
Shisa2	1164.06	-1.00083	0.168721	-5.93183	2.99574e-09	6.29217e-08	857	716	861	611	827	719	1191	1567	1880	0h>24h
Lgals9	55.5806	1.94816	0.328468	5.93107	3.00974e-09	6.31571e-08	87	84	106	113	78	116	19	22	27	24h>0h
Cd68	203.265	-1.4291	0.241004	-5.92979	3.03331e-09	6.35926e-08	110	84	153	91	111	134	250	330	302	0h>24h
Esrrb	696.875	-1.00409	0.169432	-5.92618	3.10055e-09	6.4942e-08	554	440	459	296	409	349	719	1028	1033	0h>24h
Nsg1	352.428	-1.10095	0.185849	-5.92389	3.14408e-09	6.57927e-08	241	202	261	118	164	119	358	565	518	0h>24h
Phlpp1	670.605	0.854042	0.144206	5.92235	3.17364e-09	6.635e-08	951	853	900	824	937	941	401	497	522	24h>0h
Unc5d	319.384	1.38056	0.233158	5.92115	3.19704e-09	6.67773e-08	513	416	519	491	457	478	182	205	134	24h>0h
Shcbp1l	905.297	1.10764	0.187096	5.9202	3.2155e-09	6.71009e-08	1354	1254	1261	1325	1552	1287	549	670	475	24h>0h
Srcin1	474.535	1.18704	0.200716	5.91403	3.33832e-09	6.95997e-08	801	661	601	490	666	498	212	331	325	24h>0h
Cyp26c1	45.3848	2.29407	0.388122	5.9107	3.40648e-09	7.09553e-08	85	78	73	68	56	40	10	14	22	24h>0h
Phf2	300.126	-1.06405	0.180216	-5.90427	3.54207e-09	7.37115e-08	198	211	198	138	181	154	342	470	396	0h>24h
Lrrc32	438.579	1.13225	0.191992	5.89741	3.69251e-09	7.67716e-08	597	686	597	518	609	604	211	335	276	24h>0h
Fbxo9	1317.8	-0.778823	0.132097	-5.89582	3.72818e-09	7.74419e-08	1059	980	998	703	1004	853	1474	1759	1701	0h>24h
2010107G23Rik	559.403	-1.74211	0.295524	-5.89499	3.74705e-09	7.77626e-08	315	220	274	321	470	267	431	1090	1110	0h>24h
Dgki	162.818	1.58386	0.26881	5.89212	3.81269e-09	7.90522e-08	306	211	250	405	540	387	57	77	110	24h>0h
Gm766	27.3883	-3.47605	0.590079	-5.89082	3.84285e-09	7.96044e-08	5	8	1	1	2	5	44	58	47	0h>24h
Rnf128	566.201	-1.23888	0.21043	-5.88736	3.92402e-09	8.12113e-08	354	370	328	402	469	356	804	877	655	0h>24h
Serpine1	2126.26	0.95666	0.162503	5.88703	3.93202e-09	8.13024e-08	2646	3001	3130	1466	1416	1533	1267	1371	1645	24h>0h
Ovol2	201.941	-1.43457	0.24381	-5.88398	4.0051e-09	8.2738e-08	125	105	112	78	89	83	195	316	377	0h>24h
Tgfb1i1	80.6496	2.35795	0.400783	5.88336	4.02011e-09	8.29722e-08	137	168	115	183	232	204	16	19	44	24h>0h
Pmepa1	838.115	1.12606	0.191529	5.87929	4.12025e-09	8.49614e-08	1197	1262	1131	867	1134	818	397	516	661	24h>0h
Tubb5	15007.2	-0.947027	0.161133	-5.87728	4.17055e-09	8.59201e-08	10544	9742	11869	9960	11948	11424	15260	19709	24050	0h>24h
Cdv3	4333.14	-0.761736	0.129728	-5.87178	4.31146e-09	8.87423e-08	3410	3170	3491	3625	4409	3449	4772	6193	5213	0h>24h
Zscan5b	281.526	-1.15674	0.1972	-5.86583	4.46904e-09	9.19021e-08	206	172	168	130	160	117	294	459	411	0h>24h
Gmpr	621.091	-1.27747	0.217874	-5.86334	4.53637e-09	9.32018e-08	379	334	426	202	211	154	606	872	1164	0h>24h
Egln3	1116.48	-1.02877	0.175476	-5.86275	4.55262e-09	9.34507e-08	659	796	842	371	469	431	1252	1470	1731	0h>24h
Cd248	164.704	1.35087	0.230471	5.86133	4.59185e-09	9.41704e-08	264	229	249	292	352	264	65	96	117	24h>0h
Usp10	568.464	-1.03403	0.176443	-5.86043	4.61657e-09	9.45916e-08	411	395	360	541	644	544	608	769	900	0h>24h
Manba	317.528	-0.987453	0.168601	-5.85674	4.72044e-09	9.66322e-08	222	207	238	179	230	170	384	450	415	0h>24h
Rbm11	61.3565	1.92978	0.329595	5.85499	4.77042e-09	9.74787e-08	114	82	109	92	109	120	27	23	25	24h>0h
Gm13502	305.455	-1.81839	0.310567	-5.85505	4.76862e-09	9.74787e-08	118	144	160	135	173	190	589	456	327	0h>24h
Bmp6	355.356	-1.24101	0.211973	-5.85458	4.78207e-09	9.76285e-08	247	205	210	113	111	103	353	521	625	0h>24h
Adora1	120.389	-1.49679	0.255767	-5.85217	4.85187e-09	9.89642e-08	67	70	60	49	54	38	125	202	207	0h>24h
Nrep	252.062	1.17795	0.201564	5.84403	5.09519e-09	1.03833e-07	326	362	406	321	390	388	148	165	143	24h>0h
Gdi2	5163.93	-1.10766	0.189615	-5.84164	5.16909e-09	1.05244e-07	3248	3209	3804	3597	4169	4274	7275	7486	5915	0h>24h
Ndrg3	1481.37	-0.789522	0.135288	-5.83586	5.35154e-09	1.08763e-07	1086	1156	1153	1129	1439	1329	1649	1979	1936	0h>24h
Cables1	190.79	1.3054	0.223682	5.83597	5.34782e-09	1.08763e-07	264	267	321	221	285	219	84	106	138	24h>0h
Atp2a3	163.268	-1.19698	0.20519	-5.83352	5.427e-09	1.10198e-07	106	106	98	76	89	60	196	249	230	0h>24h
Il22ra1	56.5422	-2.22059	0.380883	-5.8301	5.53931e-09	1.12377e-07	27	12	24	19	38	32	72	87	119	0h>24h
Osbpl3	414.466	-1.04896	0.17993	-5.82984	5.54805e-09	1.12454e-07	286	299	258	342	349	363	517	593	541	0h>24h
Mvk	545.365	-1.20037	0.20591	-5.8296	5.55596e-09	1.12513e-07	383	288	368	272	317	264	539	789	953	0h>24h
Atp6v1b2	2450.88	-0.8108	0.139198	-5.82481	5.71789e-09	1.15689e-07	1882	1683	2017	2336	2962	2605	2568	3164	3558	0h>24h
Dlx3	1376.99	-1.09986	0.188873	-5.82327	5.77056e-09	1.1665e-07	1032	891	817	638	825	595	1332	2118	2191	0h>24h
Gatm	264.938	1.30395	0.223967	5.82205	5.81292e-09	1.17269e-07	356	321	510	675	667	718	135	164	154	24h>0h
Mcc	303.681	-1.3936	0.23937	-5.82194	5.81674e-09	1.17269e-07	172	167	185	139	154	172	482	450	351	0h>24h
RP24-544J6.4	56.0985	-1.93498	0.332343	-5.82223	5.80679e-09	1.17269e-07	28	21	24	13	10	26	67	91	108	0h>24h
Man2a2	544.686	0.885423	0.152234	5.81621	6.01975e-09	1.21253e-07	743	727	741	823	957	785	341	423	370	24h>0h
Rdm1	209.153	-1.52114	0.262028	-5.80525	6.42717e-09	1.29345e-07	103	109	127	132	166	135	188	358	393	0h>24h
Rassf4	87.2181	1.61595	0.278627	5.7997	6.64336e-09	1.33577e-07	118	133	161	90	95	93	39	41	47	24h>0h
Slc45a3	440.975	-1.15221	0.198716	-5.79826	6.70057e-09	1.34607e-07	296	254	309	212	254	236	427	651	749	0h>24h
Nrip3	266.805	1.14025	0.196942	5.78979	7.04727e-09	1.41446e-07	360	380	408	343	386	410	164	156	170	24h>0h
Chtf18	1715.06	1.00328	0.173345	5.78779	7.1318e-09	1.43016e-07	2436	2305	2424	1773	2334	1741	812	1217	1397	24h>0h
Stk32b	43.1624	-2.69213	0.465157	-5.78759	7.14053e-09	1.43064e-07	18	13	5	6	16	11	76	70	73	0h>24h
Elf1	164.694	1.27418	0.220176	5.7871	7.1611e-09	1.43349e-07	273	214	244	306	319	312	80	117	90	24h>0h
Itga11	68.8568	1.78028	0.307731	5.78519	7.24304e-09	1.44861e-07	114	116	103	172	172	150	27	27	38	24h>0h
Arrdc4	1225.12	-0.860771	0.148796	-5.78492	7.25457e-09	1.44963e-07	922	806	1002	599	628	551	1415	1541	1719	0h>24h
Agap2	378.514	-1.63416	0.282553	-5.78356	7.31349e-09	1.46011e-07	178	189	211	132	138	113	299	726	721	0h>24h
Adar	1767.7	0.827286	0.143088	5.78164	7.39738e-09	1.47556e-07	2569	2139	2380	1988	2791	2126	995	1423	1389	24h>0h
Ptcd2	403.744	-0.998855	0.172826	-5.77955	7.48994e-09	1.4927e-07	263	287	292	339	413	355	487	522	582	0h>24h
Cep128	306.607	1.1953	0.206877	5.77783	7.56712e-09	1.50676e-07	443	437	455	426	496	446	185	211	153	24h>0h
Enox1	123.589	1.30251	0.225459	5.77717	7.59671e-09	1.51132e-07	190	168	193	168	182	178	66	76	69	24h>0h
Tmem59l	1270.73	-1.33301	0.230804	-5.77552	7.67163e-09	1.52488e-07	795	744	720	286	376	339	1086	2102	2324	0h>24h
Lmo1	120.168	1.67405	0.289905	5.77449	7.71854e-09	1.53286e-07	215	172	187	214	277	261	38	52	82	24h>0h
Lactb	311.654	-1.07066	0.185477	-5.77245	7.81273e-09	1.5502e-07	203	184	244	173	265	162	380	472	399	0h>24h
Adap1	233.028	1.27544	0.221052	5.76988	7.93295e-09	1.57267e-07	361	311	363	222	283	231	93	142	174	24h>0h
Lama2	71.5356	1.86304	0.323197	5.7644	8.19508e-09	1.62321e-07	114	109	128	124	149	133	36	24	30	24h>0h
Hoxc8	26.2027	3.3649	0.583842	5.76337	8.24491e-09	1.63165e-07	58	45	47	76	70	70	2	9	3	24h>0h
Aff3	893.411	-0.932617	0.16187	-5.76151	8.33668e-09	1.64837e-07	670	672	576	1233	1522	1219	970	1242	1277	0h>24h
4833422M21Rik	26.1596	-3.31291	0.575213	-5.75946	8.43852e-09	1.66705e-07	3	4	8	9	6	15	51	51	37	0h>24h
Lrrc4	208.797	-1.22541	0.212776	-5.75917	8.45291e-09	1.66843e-07	110	127	155	131	145	124	251	292	325	0h>24h
Tial1	1644.69	-0.778296	0.135295	-5.75261	8.78771e-09	1.733e-07	1215	1268	1307	1428	1583	1406	1786	2337	2050	0h>24h
Tapbpl	127.788	1.50469	0.261574	5.75244	8.79649e-09	1.73322e-07	236	162	196	148	134	139	46	82	72	24h>0h
Crygs	46.6928	-2.70929	0.471219	-5.74954	8.94891e-09	1.76172e-07	12	11	16	1	0	4	37	97	114	0h>24h
Ctbp2	984.955	-0.959018	0.166805	-5.74932	8.96012e-09	1.76239e-07	730	616	753	626	649	631	1254	1397	1182	0h>24h
Cspg4	109.352	1.96154	0.341196	5.749	8.97713e-09	1.7642e-07	168	198	178	156	173	135	20	54	62	24h>0h
Phldb1	2797.95	-1.11123	0.193327	-5.74794	9.03349e-09	1.77373e-07	1850	1810	1882	1605	2304	1647	2492	4462	4591	0h>24h
Pdgfrl	50.2859	1.92711	0.335282	5.74773	9.04509e-09	1.77447e-07	84	82	83	100	128	119	19	20	23	24h>0h
Fbxo40	26.2375	3.03938	0.528831	5.74736	9.06476e-09	1.77679e-07	41	45	61	172	206	160	4	7	6	24h>0h
Wdr60	549.476	0.855548	0.148903	5.74568	9.15507e-09	1.79293e-07	780	674	765	653	812	672	322	441	402	24h>0h
Faim2	88.3674	-2.01381	0.350732	-5.74174	9.37092e-09	1.83323e-07	37	21	53	59	50	33	96	168	163	0h>24h
Gm2260	1129.1	0.91004	0.158499	5.74163	9.37705e-09	1.83323e-07	1516	1502	1596	1124	1579	1219	614	788	938	24h>0h
Clcn4-2	147.527	1.3603	0.236928	5.74139	9.39035e-09	1.83424e-07	214	207	245	217	313	251	66	108	73	24h>0h
Ptgfrn	2914.85	-0.902757	0.157263	-5.74043	9.44391e-09	1.84311e-07	2218	1893	2262	1777	2319	1786	2823	4094	4459	0h>24h
C230014O12Rik	100.265	-1.6817	0.293263	-5.73445	9.7828e-09	1.9076e-07	49	41	60	26	7	12	98	189	175	0h>24h
Jarid2	5305.19	-0.746434	0.130208	-5.73262	9.88925e-09	1.9267e-07	4326	3922	4160	4696	6012	4891	5967	7341	6382	0h>24h
Arfgef2	2145.38	0.725566	0.126744	5.72467	1.03635e-08	2.01735e-07	2912	2612	2852	2946	3452	2876	1368	1666	1770	24h>0h
Osmr	113.395	2.34447	0.409561	5.72436	1.03823e-08	2.01927e-07	178	186	229	172	170	264	57	27	22	24h>0h
Mylk	673.173	0.896788	0.156672	5.72399	1.0405e-08	2.02194e-07	964	849	932	1274	1480	1234	373	564	468	24h>0h
Glud1	3617.21	-0.843995	0.147483	-5.72267	1.04866e-08	2.03605e-07	2853	2439	2824	2887	3391	2904	3828	4557	5434	0h>24h
Snx9	2074.96	-0.797179	0.139309	-5.72238	1.05041e-08	2.03701e-07	1627	1415	1713	1755	2139	1737	2308	2599	2898	0h>24h
Elavl3	159.933	1.31129	0.229154	5.72229	1.05095e-08	2.03701e-07	246	235	233	143	173	186	63	115	98	24h>0h
G3bp1	4424.8	-0.83146	0.145355	-5.72021	1.06393e-08	2.06039e-07	3323	3076	3582	3256	3960	3322	4590	5628	6653	0h>24h
Fryl	769.539	-1.12586	0.196831	-5.71994	1.06564e-08	2.06193e-07	540	486	487	426	535	492	1076	1134	887	0h>24h
C1ra	54.5622	2.21906	0.38799	5.71937	1.06922e-08	2.06711e-07	74	81	128	90	122	105	12	22	24	24h>0h
Limd2	1594.02	-1.32766	0.232291	-5.7155	1.09383e-08	2.11287e-07	987	833	1031	529	637	469	1348	2626	2936	0h>24h
Myl9	219.941	1.99852	0.349698	5.71501	1.097e-08	2.11718e-07	305	335	466	600	489	536	38	134	98	24h>0h
Hlf	448.145	-1.04772	0.183355	-5.71414	1.10257e-08	2.12613e-07	361	264	291	349	367	278	556	619	610	0h>24h
Herc6	96.2469	1.63334	0.285957	5.71182	1.11775e-08	2.15354e-07	137	153	165	115	106	68	49	53	36	24h>0h
Pcyox1l	807.382	-1.0461	0.183194	-5.71036	1.12741e-08	2.17031e-07	596	506	549	399	483	401	823	1074	1355	0h>24h
Sugt1	509.665	0.985926	0.172673	5.70977	1.13127e-08	2.17589e-07	687	610	831	879	1049	880	285	351	381	24h>0h
Cpsf6	2076.79	-0.923153	0.161766	-5.70672	1.15172e-08	2.21335e-07	1488	1440	1562	1879	2240	1919	2713	2713	2560	0h>24h
Colgalt2	54.6068	-2.08853	0.366152	-5.704	1.17027e-08	2.24707e-07	21	25	19	26	19	17	58	118	91	0h>24h
Nek7	231.176	1.43889	0.252453	5.69963	1.20071e-08	2.30357e-07	326	331	401	456	478	479	138	131	95	24h>0h
Ripk1	104.183	1.49997	0.263527	5.69192	1.25619e-08	2.40797e-07	145	160	177	225	200	254	46	69	47	24h>0h
Tppp	73.036	2.30235	0.404697	5.68907	1.27733e-08	2.44641e-07	131	136	111	61	95	100	34	24	13	24h>0h
Foxs1	27.7666	3.35413	0.589647	5.68836	1.28262e-08	2.45446e-07	40	63	55	77	86	61	1	6	8	24h>0h
Peg13	206.155	-1.44059	0.253577	-5.68108	1.33851e-08	2.55924e-07	127	130	89	81	107	80	232	381	289	0h>24h
Tpbg	769.64	-0.90318	0.158988	-5.68082	1.34052e-08	2.56092e-07	559	583	533	617	767	624	915	997	1052	0h>24h
Atp13a2	3962.56	-1.07967	0.190152	-5.67792	1.36345e-08	2.60253e-07	3001	2398	2578	2058	2601	2034	3738	5740	6691	0h>24h
Gm22918	16.9457	7.50518	1.32203	5.67701	1.37067e-08	2.61411e-07	23	28	56	81	51	100	0	0	0	24h>0h
Alox12b	108.648	1.59657	0.281247	5.67674	1.37285e-08	2.61423e-07	192	146	175	143	207	154	36	53	73	24h>0h
Fgf1	28.921	-3.45956	0.60943	-5.67672	1.37305e-08	2.61423e-07	8	6	1	13	2	6	49	70	38	0h>24h
Tle6	571.251	0.894512	0.157695	5.67242	1.40795e-08	2.67843e-07	833	718	777	732	1002	719	312	431	450	24h>0h
Arhgef10	701	0.844263	0.148921	5.66919	1.43478e-08	2.72717e-07	1034	831	959	677	852	659	429	544	517	24h>0h
Lrrc20	512.71	-0.87251	0.153924	-5.66845	1.44093e-08	2.73655e-07	379	371	384	368	473	438	523	739	718	0h>24h
Ypel1	449.473	0.867384	0.153049	5.66737	1.45006e-08	2.74927e-07	631	587	599	563	632	561	278	333	333	24h>0h
Atp8b2	2759.76	-0.773413	0.136466	-5.66743	1.44953e-08	2.74927e-07	2225	1994	2163	2141	2851	2278	2713	3786	3904	0h>24h
Nfkbid	431.749	1.00253	0.176906	5.66706	1.45272e-08	2.75201e-07	637	565	603	445	623	442	208	330	324	24h>0h
Grhl1	413.472	-0.923453	0.162992	-5.66562	1.46494e-08	2.77284e-07	294	310	288	199	251	210	469	589	549	0h>24h
Cuedc1	834.501	-1.15243	0.203445	-5.66456	1.47401e-08	2.78579e-07	608	459	559	394	508	412	778	1280	1408	0h>24h
Batf	100.84	-1.56939	0.277056	-5.66453	1.47425e-08	2.78579e-07	54	42	64	52	49	50	107	164	182	0h>24h
Lgr6	162.832	-1.27279	0.224859	-5.66038	1.51037e-08	2.85166e-07	89	108	101	88	127	101	174	252	263	0h>24h
Cdk4	4246.12	-0.979762	0.173132	-5.65904	1.52219e-08	2.87158e-07	2924	2642	3404	1899	2572	2003	4124	5917	6846	0h>24h
Edaradd	39.4916	-2.50436	0.442781	-5.65598	1.54958e-08	2.92081e-07	16	10	11	14	16	16	77	64	54	0h>24h
Arid3a	1729.83	-0.787865	0.139323	-5.65496	1.55879e-08	2.93573e-07	1377	1258	1339	833	1064	830	1697	2425	2426	0h>24h
Nfatc1	102.416	-1.40731	0.248966	-5.65262	1.58021e-08	2.97358e-07	56	54	66	53	33	61	113	164	168	0h>24h
Abhd14a	330.783	-1.16567	0.206294	-5.65056	1.59926e-08	3.00693e-07	201	222	215	126	198	152	317	555	505	0h>24h
Ice1	1659.45	-0.958629	0.169733	-5.64788	1.62435e-08	3.05157e-07	1218	1091	1224	1259	1540	1218	2093	2485	1887	0h>24h
Cpt1a	1918.32	0.766109	0.135718	5.64484	1.65331e-08	3.10339e-07	2712	2289	2573	2348	2956	2649	1136	1606	1497	24h>0h
Ccl7	142.323	1.41883	0.251422	5.6432	1.66916e-08	3.13054e-07	192	254	199	460	484	509	67	87	76	24h>0h
Mmp11	282.998	1.4668	0.25995	5.64264	1.67464e-08	3.13821e-07	404	417	482	444	600	486	94	145	214	24h>0h
Irf9	428.3	0.91255	0.161766	5.64116	1.68906e-08	3.16262e-07	609	569	573	431	560	494	235	341	311	24h>0h
Elf4	2829.79	0.819998	0.145455	5.63747	1.72566e-08	3.22847e-07	4090	3768	3434	3017	3777	3468	1741	2206	2134	24h>0h
Usp24	5239.86	1.5512	0.275188	5.63688	1.73156e-08	3.23683e-07	8522	7820	8116	6616	7727	7261	3053	3054	1648	24h>0h
Nhsl1	373.115	-1.01967	0.181019	-5.63293	1.77173e-08	3.30917e-07	281	238	253	310	368	313	445	582	455	0h>24h
Serpinb9	75.5084	1.58457	0.281365	5.63174	1.78399e-08	3.32934e-07	106	123	125	124	87	115	33	39	40	24h>0h
Pabpc1l	103.482	-1.56775	0.27847	-5.62987	1.80345e-08	3.36287e-07	56	61	46	38	75	41	111	165	188	0h>24h
Nfatc2	1458.16	-1.11389	0.197862	-5.6296	1.80629e-08	3.36538e-07	1101	1018	755	687	968	686	1662	2235	2040	0h>24h
Lfng	451.552	-1.26811	0.225333	-5.62773	1.82596e-08	3.39923e-07	275	268	287	128	172	129	407	694	825	0h>24h
Pphln1	3167.43	-1.05873	0.18827	-5.62347	1.87159e-08	3.4813e-07	2071	2040	2326	1693	2067	1871	4481	4367	3677	0h>24h
Ddhd2	2266.7	0.948128	0.168641	5.62218	1.88564e-08	3.50456e-07	3328	2954	3065	2934	3691	3181	1529	1653	1370	24h>0h
Farp1	257.884	-1.09199	0.194517	-5.61388	1.97842e-08	3.67397e-07	161	190	163	174	206	150	292	369	383	0h>24h
Psme1	1848.63	1.01128	0.18024	5.61073	2.01475e-08	3.7353e-07	2557	2318	2880	1713	2182	1850	879	1276	1522	24h>0h
Mtus1	536.199	-1.31802	0.234905	-5.61087	2.01312e-08	3.7353e-07	342	301	318	305	358	347	816	851	572	0h>24h
Ahdc1	3579.98	-0.993568	0.177113	-5.60979	2.02567e-08	3.75247e-07	2679	2547	2252	2463	3498	2563	3430	5362	5515	0h>24h
Vgll3	77.5823	2.95632	0.527569	5.60367	2.09866e-08	3.88449e-07	109	184	133	224	206	248	30	14	6	24h>0h
Casq2	14.4688	7.27686	1.29863	5.6035	2.10061e-08	3.88492e-07	30	25	36	32	36	39	0	0	0	24h>0h
Cdkn1a	1209.45	-1.21007	0.21601	-5.60192	2.11991e-08	3.91741e-07	761	705	823	866	911	744	1066	1851	2184	0h>24h
Loxl3	251.197	1.14716	0.204904	5.59852	2.16191e-08	3.9885e-07	409	339	335	311	361	291	142	145	175	24h>0h
Btf3	2739.51	-0.814641	0.145509	-5.59857	2.16123e-08	3.9885e-07	1960	1857	2417	2266	2838	2341	2964	3630	3783	0h>24h
Dzip1	739.278	-0.977485	0.174626	-5.5976	2.17342e-08	4.00647e-07	512	501	546	511	670	531	943	1091	857	0h>24h
Pla2g4f	33.5409	-2.83431	0.506382	-5.59717	2.17878e-08	4.01308e-07	13	5	8	7	5	6	39	86	53	0h>24h
Gm4430	73.4168	1.64234	0.29372	5.5915	2.2511e-08	4.1429e-07	118	109	122	86	117	84	23	41	43	24h>0h
Dppa4	457.468	-0.885806	0.158453	-5.59033	2.26642e-08	4.1677e-07	325	304	379	394	497	382	489	654	625	0h>24h
Nos2	72.6985	2.07536	0.371261	5.59004	2.27012e-08	4.17111e-07	104	145	117	30	33	44	21	20	42	24h>0h
Krt18	131.443	-1.82299	0.326348	-5.58605	2.32298e-08	4.25882e-07	44	57	81	28	30	18	131	204	283	0h>24h
Gucy1b3	38.2236	2.30892	0.413341	5.58601	2.32351e-08	4.25882e-07	61	77	60	61	53	59	12	15	11	24h>0h
Tdrd5	2351.52	-0.768962	0.137658	-5.58602	2.32336e-08	4.25882e-07	1846	1742	1857	1705	2014	1817	2785	3009	2949	0h>24h
Ide	3078.19	-1.0648	0.190672	-5.58445	2.34438e-08	4.29359e-07	2048	2051	2131	2455	2839	2819	4271	4526	3420	0h>24h
Rnf24	984.07	-1.03594	0.185538	-5.58345	2.35798e-08	4.31501e-07	752	659	606	637	820	694	1271	1459	1170	0h>24h
Fancb	87.9921	-2.13241	0.382418	-5.57613	2.45935e-08	4.49323e-07	28	36	38	28	54	57	182	133	97	0h>24h
BC029722	140.654	1.25424	0.224926	5.57624	2.4577e-08	4.49323e-07	189	204	228	189	223	209	64	89	95	24h>0h
Hdac6	7595.5	0.720421	0.129325	5.5706	2.5386e-08	4.63427e-07	10570	9208	9832	7928	10277	8517	4967	5777	6273	24h>0h
Frrs1	74.243	1.56583	0.281196	5.56847	2.56989e-08	4.68761e-07	120	103	125	112	149	151	35	42	34	24h>0h
Fkbp11	152.357	-1.25431	0.225342	-5.56624	2.603e-08	4.74418e-07	97	77	109	99	72	91	165	234	243	0h>24h
Cnn1	28.3868	3.00352	0.539649	5.56569	2.61114e-08	4.75517e-07	42	58	58	141	156	126	3	11	5	24h>0h
Cpne8	127.1	-1.42438	0.256451	-5.55421	2.78873e-08	5.07451e-07	73	67	76	79	54	61	184	210	151	0h>24h
Maf	30.0936	2.84646	0.512519	5.55386	2.79431e-08	5.08056e-07	40	64	61	64	90	69	5	11	6	24h>0h
Klk13	38.3657	-2.24116	0.403548	-5.55364	2.79781e-08	5.08285e-07	17	11	14	2	4	8	58	56	73	0h>24h
Acox1	939.019	0.751965	0.135416	5.553	2.80808e-08	5.0974e-07	1270	1198	1219	1206	1570	1325	614	750	711	24h>0h
Spag4	103.229	1.36364	0.245816	5.5474	2.89945e-08	5.25903e-07	158	152	155	108	131	128	52	54	65	24h>0h
Dzip1l	386.323	0.871922	0.157219	5.54591	2.92425e-08	5.29976e-07	548	489	528	652	861	608	232	285	294	24h>0h
Kdm5c	702.434	-0.914774	0.165036	-5.54287	2.97545e-08	5.38824e-07	521	477	528	561	758	558	674	1029	1049	0h>24h
Limk2	1720.4	-0.739615	0.133483	-5.54091	3.00909e-08	5.44479e-07	1463	1249	1325	1212	1530	1198	1808	2275	2315	0h>24h
Helz	3220.07	-0.972031	0.175558	-5.53681	3.08027e-08	5.56914e-07	2556	2302	1933	1991	2636	1939	3513	5014	4186	0h>24h
Plcl2	793.476	0.758988	0.137159	5.53364	3.1365e-08	5.66626e-07	1087	953	1087	1068	1275	1199	493	628	632	24h>0h
Amotl2	729.447	0.927752	0.167849	5.52729	3.25207e-08	5.87034e-07	1082	945	967	1135	1373	1144	396	505	598	24h>0h
Bckdhb	490.013	-0.95186	0.172307	-5.52421	3.30974e-08	5.96969e-07	373	323	350	319	351	282	586	603	720	0h>24h
Flt3	75.1184	-1.49666	0.271048	-5.52174	3.35652e-08	6.04923e-07	39	41	43	51	62	44	97	119	113	0h>24h
Hsf5	234.738	-1.27789	0.231486	-5.52038	3.38264e-08	6.09145e-07	108	162	158	156	253	170	283	377	328	0h>24h
Drd5	13.3351	-7.24041	1.31288	-5.5149	3.48975e-08	6.27933e-07	0	0	0	0	0	0	23	23	33	0h>24h
Stc2	303.497	-1.12453	0.20398	-5.51292	3.52937e-08	6.34557e-07	179	171	250	74	83	81	334	480	428	0h>24h
Rbpms2	737.21	-0.908854	0.164963	-5.50945	3.59955e-08	6.4666e-07	561	508	536	607	768	656	706	1105	1074	0h>24h
Dnm3os	21.1466	3.50567	0.636325	5.50925	3.60365e-08	6.46883e-07	37	44	40	59	41	46	5	3	2	24h>0h
Plxna3	706.311	0.928894	0.168703	5.50608	3.66913e-08	6.58115e-07	1070	966	858	1017	1122	1011	422	535	487	24h>0h
Tekt1	106.529	-1.4336	0.260484	-5.50358	3.72145e-08	6.6697e-07	65	49	67	26	42	48	114	166	186	0h>24h
Zfp385c	116.571	-1.55736	0.283115	-5.50079	3.78092e-08	6.7709e-07	79	59	47	35	52	36	127	204	191	0h>24h
D16Ertd472e	548.896	0.886803	0.161227	5.50033	3.79086e-08	6.78332e-07	780	669	785	886	1154	975	346	438	358	24h>0h
Klhdc8a	261.892	-1.41771	0.258077	-5.49335	3.94382e-08	7.05146e-07	133	124	192	77	144	115	253	405	490	0h>24h
Wfdc2	59.2025	-2.26332	0.412141	-5.49162	3.98253e-08	7.11504e-07	21	22	21	7	8	6	47	137	116	0h>24h
Samd1	2315.48	1.26298	0.229995	5.49133	3.98921e-08	7.12134e-07	3516	3420	3285	2523	3842	2712	841	1418	1856	24h>0h
Casp7	999.921	0.80763	0.147094	5.49058	4.00614e-08	7.14592e-07	1400	1261	1323	1032	1340	1254	681	730	735	24h>0h
Scamp1	683.894	-1.06258	0.193656	-5.48697	4.08893e-08	7.28784e-07	456	435	496	475	567	521	966	921	820	0h>24h
Erich2	75.0347	-1.60617	0.292767	-5.48617	4.10752e-08	7.31521e-07	31	41	44	24	31	28	104	124	106	0h>24h
Myo5b	117.122	-1.44093	0.262677	-5.48555	4.12178e-08	7.33481e-07	72	51	75	12	20	25	172	176	155	0h>24h
Tdh	86.5657	1.59179	0.290296	5.48333	4.17402e-08	7.42193e-07	144	111	154	147	171	146	31	42	56	24h>0h
Ptrf	4012.58	-1.03601	0.18913	-5.47776	4.30738e-08	7.65304e-07	2679	2551	3018	2473	2932	2318	3771	5528	6902	0h>24h
Rab11a	2363.09	-0.878015	0.160391	-5.4742	4.39483e-08	7.80229e-07	1674	1600	1949	1674	2204	1822	2676	3653	2761	0h>24h
Aldh3a2	767.075	0.773135	0.141237	5.47404	4.39894e-08	7.80346e-07	985	982	1063	984	1265	938	493	630	558	24h>0h
Tiam1	1745.53	-0.833865	0.152382	-5.47221	4.44451e-08	7.87812e-07	1499	1216	1213	1248	1561	1231	1953	2342	2337	0h>24h
Ctnnb1	13560.4	-0.667016	0.121952	-5.46951	4.5128e-08	7.99289e-07	11225	10150	11469	9187	11176	9787	14364	16817	18184	0h>24h
Ccdc13	68.3073	1.62334	0.29693	5.46709	4.57491e-08	8.09656e-07	101	102	120	68	61	65	32	38	29	24h>0h
Bean1	75.1521	-1.55149	0.283868	-5.46554	4.61508e-08	8.16126e-07	48	33	39	27	48	22	92	128	114	0h>24h
Ncaph	2145.14	-0.668438	0.122338	-5.46389	4.65825e-08	8.23115e-07	1758	1637	1795	1885	2302	2156	2207	2770	2853	0h>24h
Dnah2os	20.6798	-6.90339	1.26354	-5.46354	4.66732e-08	8.24074e-07	0	0	1	2	0	0	31	49	43	0h>24h
Stac2	789.392	-0.920163	0.16843	-5.46319	4.67649e-08	8.25048e-07	562	570	576	295	412	325	755	1146	1196	0h>24h
Ndfip1	1456.09	-0.767362	0.140493	-5.4619	4.71053e-08	8.30406e-07	1093	1107	1173	1014	1256	1174	1574	1819	2050	0h>24h
Appl2	1149.94	-0.809403	0.148215	-5.46099	4.73487e-08	8.34046e-07	852	900	859	737	842	760	1325	1593	1416	0h>24h
H2-Oa	32.6852	-2.60255	0.476601	-5.46066	4.74372e-08	8.34953e-07	9	8	12	4	1	0	49	42	75	0h>24h
Bach2	329.158	-1.11899	0.205164	-5.45409	4.9223e-08	8.65712e-07	226	205	219	264	337	263	388	570	383	0h>24h
Col16a1	417.43	1.17775	0.215988	5.45286	4.95673e-08	8.71089e-07	510	655	644	527	646	539	180	278	310	24h>0h
C1s1	148.604	1.39754	0.256469	5.44917	5.06047e-08	8.8863e-07	185	236	252	143	183	179	84	74	82	24h>0h
Uhrf1	15260.6	-0.803871	0.14753	-5.44888	5.06872e-08	8.89388e-07	12320	10592	11930	8477	11352	8040	14992	20105	22875	0h>24h
Rora	586.267	-1.57244	0.288628	-5.44797	5.09469e-08	8.93251e-07	288	330	303	247	280	275	959	1061	544	0h>24h
Ncs1	797.31	-0.956504	0.175743	-5.44262	5.25025e-08	9.19811e-07	611	505	585	405	536	449	770	1124	1260	0h>24h
Cst12	13.3515	7.16092	1.31593	5.4417	5.27741e-08	9.23853e-07	23	24	37	16	16	19	0	0	0	24h>0h
Naga	178.218	1.30465	0.239793	5.44071	5.30687e-08	9.27574e-07	271	248	277	212	281	218	64	131	115	24h>0h
Vcam1	78.3914	1.61821	0.297426	5.44072	5.30649e-08	9.27574e-07	109	130	130	209	227	224	41	35	37	24h>0h
Gja1	107.446	1.74023	0.319981	5.43853	5.37224e-08	9.38274e-07	132	158	229	150	100	96	54	51	40	24h>0h
T	18.6373	-4.22091	0.776664	-5.43467	5.48976e-08	9.58058e-07	3	0	3	2	1	3	23	45	39	0h>24h
Wnt2b	146.179	-1.13287	0.208511	-5.43317	5.53631e-08	9.64693e-07	98	87	102	80	117	93	175	222	199	0h>24h
Magea5	503.854	-0.902012	0.166019	-5.43317	5.53603e-08	9.64693e-07	368	315	420	306	356	324	587	719	639	0h>24h
Klf13	1557.17	-0.772471	0.142208	-5.43198	5.57313e-08	9.70359e-07	1301	1121	1180	1031	1383	971	1545	2200	2122	0h>24h
Ccdc6	5227.64	0.742265	0.136713	5.42939	5.65477e-08	9.83817e-07	7355	6696	6413	5588	7270	5764	3432	4268	3902	24h>0h
Myd88	274.39	0.934901	0.172219	5.42855	5.68141e-08	9.87692e-07	380	357	392	226	294	232	151	214	197	24h>0h
Pbxip1	894.962	1.07027	0.19718	5.42789	5.70254e-08	9.90602e-07	1430	1109	1265	1151	1465	1047	389	710	641	24h>0h
Cpn1	36.0499	-2.26819	0.417918	-5.42735	5.71964e-08	9.92809e-07	17	9	13	8	4	5	44	66	69	0h>24h
Mipep	1000.16	0.895745	0.165063	5.42668	5.74106e-08	9.95763e-07	1375	1184	1526	863	1095	1001	579	678	822	24h>0h
Caskin1	980.33	1.08545	0.200033	5.42634	5.75208e-08	9.96909e-07	1536	1354	1279	1158	1605	1097	418	755	720	24h>0h
Nrn1	36.0494	2.731	0.503323	5.42594	5.76492e-08	9.98369e-07	38	72	86	69	46	48	8	8	12	24h>0h
Slc7a5	12734.8	-0.854381	0.15749	-5.42499	5.79586e-08	1.00296e-06	9979	9043	9373	7911	10161	8227	13090	15908	19866	0h>24h
Mmp23	26.9611	2.64575	0.487923	5.42247	5.87818e-08	1.01643e-06	45	42	59	83	79	82	7	7	8	24h>0h
Parp8	606.652	-1.0731	0.197961	-5.42077	5.9343e-08	1.02534e-06	432	381	411	386	474	442	822	917	679	0h>24h
Mir124a-1hg	20.4627	-6.88391	1.27002	-5.42029	5.95008e-08	1.02729e-06	0	1	0	1	0	0	38	49	33	0h>24h
Mei1	506.447	0.918723	0.169539	5.41893	5.99557e-08	1.03435e-06	786	633	656	755	839	781	302	396	343	24h>0h
S1pr1	20.8635	4.27671	0.790377	5.41097	6.26837e-08	1.08059e-06	23	45	56	65	51	36	3	2	1	24h>0h
Atp6v0a1	1029.66	-0.879483	0.162589	-5.40925	6.32889e-08	1.09019e-06	818	775	672	783	1050	850	1139	1371	1451	0h>24h
Tbx2	40.1758	2.16494	0.400272	5.40868	6.34905e-08	1.09283e-06	72	55	80	70	78	67	9	16	19	24h>0h
A430005L14Rik	678.459	-0.852781	0.157692	-5.40788	6.37754e-08	1.0969e-06	520	449	548	550	721	535	750	853	988	0h>24h
Tmem108	263.628	-1.06057	0.196157	-5.40675	6.4179e-08	1.103e-06	182	176	177	222	276	215	261	389	418	0h>24h
Col4a3	28.3449	2.5747	0.476366	5.40488	6.48519e-08	1.11372e-06	47	47	58	19	13	10	9	9	6	24h>0h
Col26a1	137.932	-1.45009	0.268509	-5.40053	6.6444e-08	1.14019e-06	77	84	70	18	23	23	131	229	249	0h>24h
Spata20	31.214	-2.35471	0.43625	-5.3976	6.75385e-08	1.1581e-06	12	10	10	7	15	16	40	53	63	0h>24h
Armcx2	1942.62	-0.838175	0.155374	-5.39455	6.86971e-08	1.17707e-06	1493	1339	1537	1016	1287	1050	1902	2579	2967	0h>24h
Hcfc2	1035.19	1.05713	0.196002	5.39347	6.91084e-08	1.18322e-06	1470	1447	1456	1633	1982	1573	697	718	555	24h>0h
Gpr19	288.387	-1.04009	0.192858	-5.39306	6.92681e-08	1.18506e-06	224	168	200	216	271	190	339	374	437	0h>24h
Zscan10	184.136	-1.37153	0.254381	-5.39163	6.9822e-08	1.19363e-06	135	101	85	59	76	48	226	248	314	0h>24h
Slc16a1	3434.22	-0.62783	0.116449	-5.39146	6.9887e-08	1.19384e-06	2882	2688	2880	2706	3468	2751	3605	4438	4333	0h>24h
Fam172a	400.208	0.898235	0.166723	5.38758	7.14122e-08	1.21897e-06	552	487	595	518	718	602	248	316	265	24h>0h
Nek3	374.701	0.928239	0.172403	5.38411	7.28026e-08	1.24176e-06	513	446	584	634	885	655	206	285	279	24h>0h
St6gal1	455.978	0.882236	0.163949	5.38116	7.40089e-08	1.26139e-06	603	573	678	467	553	499	252	339	366	24h>0h
Cldn4	47.6101	-2.15694	0.401232	-5.37579	7.62467e-08	1.29855e-06	17	14	24	24	13	14	46	98	92	0h>24h
Rhob	874.197	0.844814	0.157208	5.37385	7.70747e-08	1.31166e-06	1124	1089	1308	1273	1536	1285	551	601	700	24h>0h
Tnfaip6	21.4863	6.87472	1.27946	5.37315	7.73716e-08	1.31572e-06	31	42	61	10	24	10	0	1	0	24h>0h
Klhl32	111.157	1.27259	0.236857	5.37285	7.75038e-08	1.31698e-06	156	151	186	164	149	173	58	71	64	24h>0h
Wdr25	497.879	0.819118	0.152584	5.36832	7.94719e-08	1.34941e-06	688	591	715	414	538	415	298	385	389	24h>0h
Mrps27	867.347	-0.852418	0.158844	-5.36639	8.0326e-08	1.36289e-06	604	624	709	649	762	735	899	1131	1296	0h>24h
Gm17055	47.1089	-2.13784	0.398719	-5.36178	8.24072e-08	1.39715e-06	16	14	25	11	5	5	51	105	76	0h>24h
Kbtbd2	737.231	-0.875037	0.163283	-5.35901	8.36769e-08	1.41762e-06	580	507	542	599	755	661	922	982	906	0h>24h
Slc16a2	71.8767	1.8053	0.337035	5.35643	8.48845e-08	1.437e-06	94	140	114	119	172	147	26	28	41	24h>0h
Tmem180	109.002	-1.56753	0.292725	-5.35498	8.55677e-08	1.44748e-06	70	41	62	72	63	67	141	141	201	0h>24h
Emp2	154.613	1.18545	0.221543	5.3509	8.75199e-08	1.47939e-06	220	215	237	211	222	256	93	86	99	24h>0h
Ppp1r18	1903.34	-1.41237	0.263965	-5.35059	8.76674e-08	1.48078e-06	1112	1076	1064	1095	1458	999	1441	3530	3470	0h>24h
Rundc3b	1188.83	0.855251	0.159899	5.3487	8.85891e-08	1.49523e-06	1553	1532	1711	1441	1705	1525	756	997	757	24h>0h
Slpi	69.865	1.51575	0.28356	5.34544	9.01968e-08	1.52123e-06	106	109	109	103	100	147	28	41	39	24h>0h
Gpm6a	77.7355	-1.78827	0.33484	-5.34066	9.26071e-08	1.56072e-06	39	35	35	41	37	34	139	117	94	0h>24h
Stat1	343.323	0.87697	0.164417	5.33381	9.61708e-08	1.61957e-06	456	471	463	301	389	337	207	262	250	24h>0h
1700040L02Rik	24.8041	2.96051	0.555228	5.33206	9.71074e-08	1.63412e-06	36	46	56	28	45	35	3	9	5	24h>0h
Entpd6	2907.51	-0.872025	0.163615	-5.32973	9.83577e-08	1.65393e-06	2260	1926	2258	1995	2557	2090	2760	4003	4506	0h>24h
Eno1b	5625.29	-1.01327	0.190179	-5.328	9.92975e-08	1.66849e-06	3714	3478	4508	2587	2970	2731	6233	6661	9453	0h>24h
Zdhhc23	287.185	1.21464	0.228046	5.32628	1.00246e-07	1.68318e-06	468	397	391	508	576	503	161	215	136	24h>0h
C2cd5	1368.02	-0.959445	0.180277	-5.32206	1.02601e-07	1.72145e-06	1014	930	964	1186	1348	1247	1850	1845	1602	0h>24h
Fmnl3	2026.54	-0.858256	0.161334	-5.31975	1.0391e-07	1.74212e-06	1582	1494	1430	1879	2341	1914	1993	2720	3096	0h>24h
Saa3	384.687	1.64227	0.308747	5.31915	1.04251e-07	1.74653e-06	571	472	793	703	782	620	161	124	267	24h>0h
Bach1	1459.23	-1.0763	0.202398	-5.31776	1.05055e-07	1.7587e-06	969	1002	963	1333	1540	1345	1992	2251	1575	0h>24h
Tmem98	129.864	-1.2888	0.242457	-5.31557	1.06322e-07	1.77858e-06	72	78	86	76	87	138	169	165	210	0h>24h
Arhgap8	140.213	-1.39742	0.262904	-5.31532	1.06472e-07	1.77978e-06	98	58	87	48	60	44	147	227	236	0h>24h
Myom2	44.7594	2.17923	0.41008	5.31417	1.07146e-07	1.78972e-06	75	84	69	29	30	32	21	13	13	24h>0h
Igfbp3	658.896	0.915877	0.172376	5.31324	1.07694e-07	1.79754e-06	868	895	931	993	1243	1119	428	415	503	24h>0h
Nacc2	494.901	0.998852	0.188058	5.3114	1.08785e-07	1.81442e-06	749	601	721	464	579	489	232	397	363	24h>0h
Ncf2	88.5177	-1.45237	0.273512	-5.31009	1.0957e-07	1.82616e-06	45	41	63	45	45	56	104	148	135	0h>24h
St3gal1	1221.06	-0.956724	0.180254	-5.30765	1.11045e-07	1.84939e-06	997	869	728	678	871	686	1300	1756	1749	0h>24h
Plk5	223.611	0.980457	0.184732	5.30745	1.11169e-07	1.85009e-06	332	288	310	103	152	113	122	161	165	24h>0h
Phactr1	46.4498	2.21719	0.418211	5.30162	1.1478e-07	1.90878e-06	70	74	96	70	68	63	12	11	26	24h>0h
Scarb2	296.914	-1.13409	0.21407	-5.29774	1.17242e-07	1.94829e-06	156	221	203	186	214	208	339	418	456	0h>24h
S1pr2	597.914	-0.835879	0.157843	-5.29562	1.18613e-07	1.96962e-06	460	417	469	370	410	410	586	839	867	0h>24h
RP24-448C16.7	20.571	-3.56899	0.674362	-5.29238	1.20732e-07	2.00333e-06	2	4	4	3	9	7	33	55	25	0h>24h
Plbd2	1767.95	0.94787	0.179114	5.29201	1.2098e-07	2.00451e-06	2530	2308	2455	2142	2702	2021	869	1233	1517	24h>0h
Cotl1	1140.03	-1.20309	0.227339	-5.29204	1.20959e-07	2.00451e-06	783	627	757	489	668	522	1020	1627	2147	0h>24h
Eomes	47.0409	-2.06855	0.390936	-5.29126	1.21474e-07	2.01121e-06	26	13	18	8	21	12	54	78	96	0h>24h
Ankrd29	73.4297	1.50863	0.285298	5.28792	1.23714e-07	2.0468e-06	108	111	121	104	123	97	36	44	33	24h>0h
Fnip2	2980.95	0.930695	0.176053	5.28643	1.24723e-07	2.06199e-06	4392	4019	3816	4789	5959	5183	2013	2236	1789	24h>0h
Ywhag	4249.51	-0.707171	0.133797	-5.2854	1.25434e-07	2.07222e-06	3435	3282	3387	3678	4509	3525	4091	5953	5712	0h>24h
Plce1	53.1075	2.14035	0.405005	5.28475	1.25875e-07	2.078e-06	88	92	91	131	181	135	14	33	12	24h>0h
Rhoc	1296.17	-1.22456	0.231734	-5.28433	1.26163e-07	2.08122e-06	806	707	927	710	914	696	1114	1973	2403	0h>24h
Tarsl2	248.493	-1.00586	0.190385	-5.28331	1.26872e-07	2.0914e-06	179	153	186	123	145	136	307	367	307	0h>24h
Klhl29	530.644	-0.840957	0.159184	-5.28292	1.27142e-07	2.09433e-06	434	380	376	357	512	328	565	711	750	0h>24h
Kctd11	171.056	1.25423	0.237421	5.28272	1.27282e-07	2.09511e-06	207	267	280	57	82	76	76	108	118	24h>0h
Pfkl	2566.22	-1.15572	0.21879	-5.28233	1.27552e-07	2.09801e-06	1503	1510	1978	775	943	672	2360	3639	4666	0h>24h
Tpm4	1073.91	0.868984	0.164555	5.28081	1.28611e-07	2.1139e-06	1260	1448	1637	1350	1385	1560	677	834	741	24h>0h
Tox2	172.549	-1.51577	0.287104	-5.27953	1.29516e-07	2.12723e-06	107	111	60	41	95	56	206	278	278	0h>24h
Hsd17b10	658.441	-1.09638	0.207689	-5.27897	1.29913e-07	2.1322e-06	468	349	503	341	383	402	686	861	1133	0h>24h
Kif5c	1114.93	-0.977206	0.185222	-5.27587	1.32126e-07	2.16694e-06	832	717	805	799	990	810	1382	1763	1227	0h>24h
Wnt3	237.078	-1.29838	0.246273	-5.2721	1.34873e-07	2.20892e-06	174	124	132	78	97	80	223	380	413	0h>24h
Itpripl1	565.339	-1.08017	0.204885	-5.27209	1.34881e-07	2.20892e-06	426	310	405	420	567	462	549	802	952	0h>24h
Lmod1	24.4508	2.8535	0.541411	5.2705	1.36052e-07	2.22648e-06	47	42	46	66	79	85	2	9	7	24h>0h
C3	879.766	0.834943	0.158447	5.26953	1.36773e-07	2.23666e-06	1126	1142	1262	942	970	998	574	595	699	24h>0h
Kat2b	481.056	-1.68187	0.319224	-5.26861	1.37463e-07	2.24632e-06	242	224	250	227	267	232	859	864	407	0h>24h
Pfkm	381.389	-0.890174	0.169046	-5.26589	1.39514e-07	2.2782e-06	281	271	285	260	322	271	399	504	573	0h>24h
Ccdc8	333.221	-1.10448	0.209821	-5.26394	1.41001e-07	2.30081e-06	219	201	244	97	137	98	305	542	524	0h>24h
Fam109a	934.502	-1.39059	0.264237	-5.26268	1.41969e-07	2.31493e-06	579	543	491	482	602	468	748	1523	1840	0h>24h
Car6	118.651	-1.35244	0.257167	-5.25901	1.44836e-07	2.35997e-06	72	72	65	20	38	44	119	214	180	0h>24h
Olr1	52.5823	2.3061	0.438551	5.25845	1.45273e-07	2.36539e-06	84	102	86	111	116	127	25	17	9	24h>0h
Il12rb1	131.387	-1.62893	0.309898	-5.25635	1.46946e-07	2.39091e-06	74	67	60	57	74	57	111	230	262	0h>24h
Prrx1	212.075	1.74365	0.331828	5.25469	1.48274e-07	2.41078e-06	283	380	355	410	420	484	129	81	70	24h>0h
Dlx2	69.2447	-1.59123	0.302857	-5.25404	1.48796e-07	2.41754e-06	41	36	31	73	101	72	78	109	124	0h>24h
Smad3	868.281	0.817952	0.155687	5.25382	1.48978e-07	2.41875e-06	1096	1175	1195	813	1141	936	482	698	699	24h>0h
Tctn1	259.682	1.01492	0.193255	5.25169	1.50707e-07	2.44507e-06	409	327	353	317	345	264	143	204	165	24h>0h
Col18a1	2101.12	-1.19064	0.226805	-5.2496	1.52431e-07	2.47126e-06	1356	1121	1547	872	1046	787	1787	3369	3688	0h>24h
Ptch2	1056.32	-1.12725	0.21474	-5.24937	1.52623e-07	2.47261e-06	782	685	607	547	743	573	947	1727	1700	0h>24h
Gm13387	27.2308	-2.9138	0.55575	-5.24301	1.57982e-07	2.55759e-06	12	5	3	9	5	4	37	61	46	0h>24h
Gucy1a3	16.8597	4.57024	0.871806	5.24227	1.58616e-07	2.56602e-06	33	34	34	25	35	23	2	0	2	24h>0h
Rhof	223.666	-0.9567	0.182614	-5.23892	1.61521e-07	2.61115e-06	159	143	175	174	225	203	256	307	313	0h>24h
Gm12216	34.6814	2.15855	0.412044	5.23865	1.61756e-07	2.61308e-06	57	54	67	60	75	72	9	17	12	24h>0h
Lpin1	2539.37	-0.689643	0.131817	-5.23183	1.67843e-07	2.7069e-06	2112	2004	1963	1415	2048	1611	2805	3285	3192	0h>24h
Ifi44	25.6349	3.07461	0.587684	5.23174	1.67924e-07	2.7069e-06	31	43	70	54	41	47	6	4	6	24h>0h
Tmem167b	789.871	0.702013	0.134177	5.23198	1.67706e-07	2.7069e-06	1015	979	1070	983	1136	1020	507	652	629	24h>0h
Pagr1a	29.1241	2.62756	0.502281	5.23124	1.68374e-07	2.71223e-06	56	59	41	37	30	36	8	11	5	24h>0h
Itga3	1865.88	-0.872943	0.166882	-5.23089	1.68696e-07	2.71354e-06	1436	1323	1367	879	1099	841	1797	2487	2941	0h>24h
Nkd2	254.948	1.17721	0.225049	5.23089	1.68692e-07	2.71354e-06	378	319	414	309	444	340	111	210	149	24h>0h
Nodal	33.9492	-2.67506	0.511557	-5.22925	1.70196e-07	2.73573e-06	17	4	8	17	1	9	43	61	72	0h>24h
Chd3os	1701.21	0.73379	0.140462	5.22412	1.74989e-07	2.81076e-06	2360	1954	2352	2380	2765	2157	1141	1408	1237	24h>0h
Tbx1	90.3129	1.78726	0.342402	5.21977	1.7915e-07	2.87555e-06	146	173	117	292	305	276	25	39	58	24h>0h
Ctsh	52.2428	2.05791	0.394439	5.21732	1.81533e-07	2.91174e-06	72	75	118	107	100	124	19	27	14	24h>0h
Slc29a1	1056.15	0.847932	0.162607	5.2146	1.84209e-07	2.95258e-06	1509	1293	1455	1155	1470	1188	570	787	899	24h>0h
Apbb1	1615.69	1.08741	0.208558	5.21394	1.84874e-07	2.96114e-06	2433	2079	2378	2198	2672	2213	672	1096	1349	24h>0h
March8	2612.52	0.670303	0.128638	5.21079	1.88036e-07	3.00964e-06	3496	3207	3342	3319	4185	3495	1739	2270	1980	24h>0h
Egfr	97.7069	1.32069	0.253496	5.20993	1.8891e-07	3.02149e-06	133	150	153	80	99	136	53	57	55	24h>0h
Psme2	1331.58	1.10347	0.211936	5.20661	1.92322e-07	3.07388e-06	2004	1431	2291	1340	1742	1222	592	951	999	24h>0h
Cep104	798.607	-0.75724	0.14547	-5.20549	1.93489e-07	3.09035e-06	637	626	593	690	864	761	852	1051	1078	0h>24h
Siglec1	45.2159	-2.07105	0.39795	-5.20431	1.94724e-07	3.10788e-06	20	23	11	34	32	22	70	73	72	0h>24h
Man2b2	351.854	1.13545	0.218237	5.20281	1.96296e-07	3.13076e-06	561	482	471	394	465	381	151	228	282	24h>0h
Scarf2	103.015	1.37085	0.263513	5.20223	1.96908e-07	3.1383e-06	153	150	162	214	274	215	51	48	71	24h>0h
Atp1a3	40.304	2.00964	0.386492	5.19968	1.99631e-07	3.17946e-06	78	56	69	44	48	44	11	17	20	24h>0h
Zfp503	151.495	1.61249	0.310239	5.19757	2.01909e-07	3.21348e-06	223	200	296	267	257	255	38	92	97	24h>0h
Runx1t1	44.4977	2.30675	0.443941	5.19607	2.03549e-07	3.23731e-06	77	74	80	60	64	72	22	9	12	24h>0h
Slc25a30	382.121	0.9351	0.180027	5.19423	2.05564e-07	3.26706e-06	559	512	498	456	534	451	248	286	241	24h>0h
Hcar1	38.2389	-2.44434	0.470614	-5.19394	2.05889e-07	3.26991e-06	10	14	13	8	5	6	69	41	78	0h>24h
Uhrf1bp1	3028.46	0.750764	0.144558	5.19353	2.06344e-07	3.27484e-06	4456	3680	3761	3676	4729	3736	1828	2471	2431	24h>0h
Dlgap3	283.057	1.44434	0.278114	5.19335	2.06544e-07	3.27572e-06	458	380	462	316	453	304	84	159	218	24h>0h
Fbxo15	255.352	-1.04225	0.200696	-5.19316	2.06753e-07	3.27673e-06	168	172	182	117	208	194	343	348	319	0h>24h
Hnrnpll	2195.59	-0.647083	0.124638	-5.19168	2.08405e-07	3.30059e-06	1768	1670	1925	1746	2061	1801	2370	2810	2761	0h>24h
Pygm	484.774	-1.08782	0.209734	-5.18666	2.14095e-07	3.38834e-06	311	356	301	317	356	299	481	669	825	0h>24h
Slc27a6	49.8691	-1.76553	0.340505	-5.18502	2.15992e-07	3.41597e-06	29	22	20	28	31	41	61	85	84	0h>24h
Mpzl3	471.159	-0.820353	0.158279	-5.18295	2.18406e-07	3.45173e-06	385	317	366	346	420	413	545	625	610	0h>24h
Dazap2	1680.37	0.705877	0.136236	5.1813	2.2035e-07	3.48002e-06	2191	2195	2128	1861	2322	2026	1060	1449	1294	24h>0h
E330013P04Rik	16.7894	-4.66115	0.899986	-5.17914	2.22915e-07	3.51808e-06	0	1	3	2	2	8	36	30	28	0h>24h
Slc39a3	290.682	1.15705	0.223427	5.17868	2.23465e-07	3.5243e-06	425	441	388	496	683	512	121	194	226	24h>0h
Glrx2	210.657	-1.27903	0.247025	-5.17773	2.24603e-07	3.53977e-06	159	93	135	138	151	105	237	373	282	0h>24h
Lbp	36.2912	2.17851	0.420951	5.1752	2.27665e-07	3.58552e-06	52	75	58	39	55	47	11	14	14	24h>0h
N28178	115.115	1.307	0.252577	5.17467	2.2831e-07	3.59319e-06	178	153	183	147	174	156	63	79	54	24h>0h
Gm340	2432.77	0.793119	0.153394	5.17048	2.33489e-07	3.67214e-06	3375	3119	3161	3803	4705	4159	1428	2182	1707	24h>0h
P4ha1	3574.63	-0.749455	0.145025	-5.16777	2.36899e-07	3.72317e-06	2517	2726	3108	1724	1984	1785	3970	4519	4787	0h>24h
Radil	1596.41	0.875954	0.169542	5.16658	2.38416e-07	3.7444e-06	2288	2182	1989	1428	1960	1487	824	1287	1266	24h>0h
Hmgcl	517.755	-1.31469	0.254502	-5.16571	2.39527e-07	3.75924e-06	355	221	360	248	282	186	472	821	937	0h>24h
Prrt2	17.7612	4.3554	0.844378	5.15812	2.49447e-07	3.91222e-06	49	23	35	33	43	16	0	2	3	24h>0h
Etv6	1539.41	0.747847	0.145044	5.15602	2.5226e-07	3.95359e-06	2241	1872	1930	1661	2157	1769	964	1194	1258	24h>0h
Fam84b	114.106	-1.40384	0.272476	-5.15216	2.57499e-07	4.0329e-06	56	63	77	34	22	31	162	190	136	0h>24h
Gbp10	17.9482	5.10269	0.99059	5.15117	2.58872e-07	4.0516e-06	30	49	29	29	48	48	1	0	2	24h>0h
Pcolce	972.873	0.74963	0.145593	5.1488	2.62162e-07	4.10026e-06	1240	1152	1436	1313	1387	1331	614	748	794	24h>0h
Kcmf1	3004.31	-0.799116	0.155307	-5.14539	2.66969e-07	4.17254e-06	2327	2056	2496	2342	2787	2417	3286	3583	4444	0h>24h
Eml2	356.144	-1.06958	0.207884	-5.14509	2.67392e-07	4.17627e-06	220	202	301	165	180	132	361	539	545	0h>24h
Tpmt	256.558	-1.47413	0.286945	-5.13732	2.78686e-07	4.34966e-06	126	129	171	140	151	168	405	444	255	0h>24h
Clip4	269.11	-1.03045	0.200684	-5.13471	2.82573e-07	4.40728e-06	189	159	207	178	207	173	349	391	325	0h>24h
Kl	16.9672	-6.60914	1.28821	-5.1305	2.88978e-07	4.50408e-06	1	0	0	3	0	1	36	28	34	0h>24h
Ccl2	231.824	1.10281	0.21511	5.12672	2.94831e-07	4.59213e-06	297	353	338	549	601	645	131	177	129	24h>0h
Prkcdbp	137.648	1.25279	0.244458	5.12476	2.97916e-07	4.63699e-06	198	179	231	148	163	120	83	71	85	24h>0h
Dnajc28	189.595	1.03899	0.202841	5.1222	3.01985e-07	4.69708e-06	277	225	299	284	337	279	111	135	122	24h>0h
Ctdspl	603.555	0.845001	0.165072	5.11899	3.07175e-07	4.77452e-06	881	763	784	694	905	780	351	432	502	24h>0h
Zcchc6	357.314	-1.39876	0.27331	-5.11784	3.09058e-07	4.80048e-06	230	191	194	299	364	343	552	617	348	0h>24h
Mertk	238.446	-1.1648	0.227615	-5.11742	3.0974e-07	4.80778e-06	147	166	146	154	154	150	316	384	273	0h>24h
Lrp8	469.614	-0.81279	0.158895	-5.11525	3.1333e-07	4.86016e-06	396	320	352	255	233	205	498	650	633	0h>24h
Hes1	1024.94	-1.03808	0.20295	-5.11495	3.13818e-07	4.8644e-06	671	652	782	525	704	588	1063	1246	1804	0h>24h
Twist1	207.654	-1.27152	0.248761	-5.11142	3.19754e-07	4.95302e-06	127	113	142	156	173	139	195	300	389	0h>24h
Igf1r	2979.28	-0.785417	0.153763	-5.10797	3.25632e-07	5.0406e-06	2645	2073	2135	2613	3373	2686	3252	3875	4062	0h>24h
Zhx3	1030.05	0.751667	0.14719	5.10677	3.27713e-07	5.06935e-06	1412	1247	1392	1419	1578	1290	607	911	775	24h>0h
Pex19	1988.65	-0.687864	0.134821	-5.10205	3.35992e-07	5.19386e-06	1679	1511	1580	1451	2006	1637	1948	2673	2702	0h>24h
Fam19a5	109.157	1.58507	0.311234	5.09286	3.52694e-07	5.44832e-06	177	124	215	118	159	135	51	42	68	24h>0h
Zfp282	88.1038	1.73484	0.340679	5.09231	3.53726e-07	5.46053e-06	120	170	132	162	203	155	27	36	59	24h>0h
Gpr146	85.1891	1.33917	0.263112	5.08972	3.58584e-07	5.53173e-06	130	113	140	138	162	133	43	46	54	24h>0h
Myrip	336.145	0.932032	0.183272	5.08551	3.66634e-07	5.65206e-06	464	426	493	367	433	357	183	227	279	24h>0h
Cep89	806.87	0.766432	0.150738	5.08454	3.68524e-07	5.67733e-06	1088	1004	1092	1295	1378	1190	457	652	677	24h>0h
Shank2	452.128	1.00192	0.197092	5.08349	3.70558e-07	5.70477e-06	716	643	524	546	611	537	252	340	304	24h>0h
Zfp57	394.306	-0.895533	0.176221	-5.08188	3.73716e-07	5.74948e-06	269	259	337	237	245	244	469	545	503	0h>24h
Oxct1	990.524	0.742623	0.146163	5.08079	3.75874e-07	5.77874e-06	1259	1223	1403	1081	1186	1163	672	819	703	24h>0h
Nfya	1995.4	-0.663748	0.130656	-5.08014	3.77165e-07	5.79315e-06	1635	1491	1715	1393	1778	1363	1951	2669	2679	0h>24h
Klhl13	622.903	0.956386	0.188263	5.08006	3.77324e-07	5.79315e-06	818	871	881	937	1011	1023	423	459	364	24h>0h
Fahd1	171.441	-1.02816	0.202419	-5.0794	3.78637e-07	5.80542e-06	113	106	135	99	106	76	191	257	237	0h>24h
Psme2b	369.132	1.42429	0.280404	5.07941	3.78615e-07	5.80542e-06	593	428	674	387	442	399	109	243	257	24h>0h
Fam171b	421.98	1.45213	0.285995	5.07746	3.82519e-07	5.86097e-06	638	659	634	905	980	1054	254	266	139	24h>0h
Gm14036	2731.19	-0.985787	0.194285	-5.07393	3.89675e-07	5.96657e-06	1716	1765	2269	1737	2295	2160	3754	3426	3443	0h>24h
Pnpla6	1252.16	-0.883814	0.174289	-5.07095	3.95827e-07	6.05666e-06	936	864	958	661	876	672	1174	1702	1994	0h>24h
Gdpd5	207.188	-1.42665	0.281441	-5.06909	3.99715e-07	6.11202e-06	152	81	121	91	120	88	198	343	370	0h>24h
Cacna1g	326.866	-1.11953	0.220945	-5.06699	4.0415e-07	6.17565e-06	256	203	186	185	206	161	315	534	497	0h>24h
Ets2	434.053	-0.795175	0.157003	-5.0647	4.09042e-07	6.24619e-06	350	322	321	247	280	247	476	569	589	0h>24h
Etfb	452.947	1.13826	0.224793	5.0636	4.11412e-07	6.27813e-06	685	536	738	470	577	516	183	312	358	24h>0h
Rab25	46.5135	-1.92305	0.380051	-5.05998	4.19299e-07	6.39417e-06	23	15	23	9	20	19	64	61	93	0h>24h
Slc35f6	559.062	0.769709	0.152155	5.05871	4.22103e-07	6.43259e-06	731	692	786	666	780	675	324	453	457	24h>0h
Kctd6	791.068	0.747254	0.147741	5.05785	4.24007e-07	6.45486e-06	1083	1006	1014	872	1223	858	475	684	603	24h>0h
Lamc3	17.121	3.79053	0.749444	5.05779	4.24135e-07	6.45486e-06	36	35	29	8	15	28	0	4	3	24h>0h
H2-K1	1341.25	0.778315	0.153903	5.05717	4.25516e-07	6.4715e-06	1868	1486	1970	1141	1273	1087	807	1032	1103	24h>0h
Zbtb43	3205.71	0.622767	0.123172	5.05609	4.2794e-07	6.504e-06	4262	3866	4042	3627	4588	3760	2093	2702	2717	24h>0h
Rps4x	2256.9	-0.90353	0.178733	-5.0552	4.29947e-07	6.53011e-06	1399	1508	2029	1353	1425	1682	2511	2966	3255	0h>24h
Tgfb2	39.4395	2.04301	0.40428	5.05346	4.33881e-07	6.58543e-06	54	66	79	106	119	90	12	21	13	24h>0h
Fbxl14	1448.16	-0.741607	0.146842	-5.05038	4.40924e-07	6.68784e-06	1120	1083	1192	1492	1995	1421	1481	1805	2108	0h>24h
Mlxipl	957.048	0.940491	0.186258	5.0494	4.43192e-07	6.71773e-06	1427	1370	1131	911	1090	922	524	796	638	24h>0h
Cpa2	14.8823	-4.48862	0.889704	-5.04507	4.53367e-07	6.86736e-06	2	0	2	0	1	1	23	30	32	0h>24h
Prdx1	15230.8	-0.626032	0.124147	-5.04267	4.59073e-07	6.94913e-06	11994	11688	13865	10015	12492	12621	16164	19445	19204	0h>24h
Raver2	751.031	-0.896359	0.17777	-5.04224	4.60124e-07	6.95792e-06	551	562	527	446	565	526	955	1044	877	0h>24h
Tada3	713.512	-0.826269	0.163872	-5.04218	4.60269e-07	6.95792e-06	557	531	522	462	597	475	703	955	1068	0h>24h
Mboat2	1121.84	-0.715346	0.142208	-5.03029	4.89743e-07	7.39853e-06	854	848	958	738	841	848	1275	1401	1445	0h>24h
Crat	511.742	0.899019	0.178798	5.02814	4.95266e-07	7.47696e-06	784	654	648	566	790	561	272	386	410	24h>0h
Dab1	447.746	-0.958921	0.19073	-5.02763	4.96592e-07	7.49197e-06	324	327	300	363	437	398	426	722	628	0h>24h
Ict1	633.375	-0.907221	0.180521	-5.02556	5.01972e-07	7.56808e-06	498	386	500	379	449	458	619	877	977	0h>24h
Ago2	969.321	-0.843087	0.16784	-5.02315	5.08302e-07	7.65841e-06	750	738	680	707	866	707	1163	1382	1132	0h>24h
Celsr1	565.244	-0.778563	0.155122	-5.01902	5.19349e-07	7.81964e-06	482	392	431	189	247	169	585	771	771	0h>24h
Jdp2	154.963	-1.32348	0.263707	-5.01877	5.20038e-07	7.82481e-06	82	83	113	60	63	70	154	223	288	0h>24h
Anxa11	2118.18	0.909915	0.181331	5.01798	5.22165e-07	7.85159e-06	2924	2907	2814	2276	3034	2262	1051	1525	1838	24h>0h
Zfyve19	427.097	0.822987	0.164067	5.01617	5.27114e-07	7.92073e-06	566	542	602	691	831	670	245	368	308	24h>0h
Fancg	1045.92	0.715395	0.142651	5.01499	5.3036e-07	7.9642e-06	1412	1307	1351	1137	1323	1169	624	855	884	24h>0h
Rpl7	13597.4	-0.67543	0.13469	-5.01469	5.31193e-07	7.97143e-06	10196	10227	12410	12436	14429	14423	14332	17346	17970	0h>24h
Atp8b1	17.0631	3.53739	0.705493	5.01406	5.32929e-07	7.9822e-06	36	23	40	22	16	14	3	3	2	24h>0h
A730013G03Rik	22.1839	2.88689	0.575755	5.0141	5.32832e-07	7.9822e-06	47	35	41	22	26	13	2	9	5	24h>0h
Slc9a6	1353.48	0.745634	0.148709	5.01405	5.32971e-07	7.9822e-06	1832	1636	1845	1850	2203	1952	970	1031	979	24h>0h
Sord	478.821	0.832986	0.166137	5.01384	5.33547e-07	7.98554e-06	696	582	645	559	647	497	264	377	388	24h>0h
Mdp1	53.4226	1.71568	0.342337	5.01167	5.39606e-07	8.07088e-06	89	81	87	92	76	90	15	27	33	24h>0h
Dapk1	179.614	-1.13597	0.226695	-5.011	5.41489e-07	8.09368e-06	111	117	124	137	186	185	170	298	275	0h>24h
Slco2a1	94.4802	-1.32302	0.264054	-5.01044	5.43071e-07	8.11196e-06	62	49	58	68	88	68	132	125	140	0h>24h
Rims1	241.009	1.42599	0.284713	5.00852	5.48492e-07	8.18752e-06	380	373	345	565	584	578	106	195	90	24h>0h
Cnih3	34.7043	-2.25127	0.449554	-5.00778	5.50608e-07	8.21369e-06	12	9	17	7	7	10	37	59	77	0h>24h
Tgfb3	51.1461	2.41808	0.48299	5.00648	5.5434e-07	8.26391e-06	69	81	120	179	221	168	25	10	11	24h>0h
Mapt	282.184	-0.986383	0.197079	-5.005	5.58614e-07	8.32213e-06	220	186	187	109	168	122	279	406	438	0h>24h
Bicc1	621.583	-0.74421	0.148736	-5.00355	5.62853e-07	8.37976e-06	502	475	477	431	522	467	676	873	762	0h>24h
C920006O11Rik	43.5392	-1.95345	0.390581	-5.00139	5.69181e-07	8.46839e-06	13	19	24	31	25	17	59	87	60	0h>24h
Sgpp2	710.702	-0.905901	0.181255	-4.99795	5.79437e-07	8.61532e-06	540	526	479	397	434	404	920	933	870	0h>24h
AU015836	110.214	1.48082	0.296314	4.99746	5.80892e-07	8.63126e-06	155	182	169	219	224	224	65	63	42	24h>0h
Agap1	4461.48	-0.787912	0.157684	-4.99677	5.82986e-07	8.6567e-06	3723	3160	3369	2844	3614	2763	4257	5966	6684	0h>24h
Nrp1	90.2562	1.78209	0.356813	4.99448	5.89954e-07	8.75441e-06	121	154	162	157	178	213	41	56	23	24h>0h
AI854517	51.239	1.65024	0.330432	4.99419	5.90822e-07	8.76153e-06	80	74	90	116	172	105	18	26	30	24h>0h
Zfp488	33.1216	2.10052	0.420675	4.99321	5.93835e-07	8.80044e-06	65	52	51	63	80	73	12	11	14	24h>0h
Cdk6	923.549	0.896225	0.179565	4.9911	6.0036e-07	8.89131e-06	1374	1178	1209	1676	1983	1711	636	698	566	24h>0h
Col27a1	83.8708	1.45763	0.292236	4.98787	6.1049e-07	9.03542e-06	121	123	142	87	92	66	27	55	53	24h>0h
Vamp1	605.299	1.05129	0.21078	4.98762	6.11268e-07	9.04101e-06	779	694	1098	762	771	805	304	477	398	24h>0h
Tspan5	779.98	-0.903512	0.181217	-4.98579	6.17085e-07	9.12108e-06	587	529	587	549	694	536	763	1007	1270	0h>24h
Abcd2	97.6006	-1.60259	0.321557	-4.98383	6.23372e-07	9.20797e-06	47	52	52	107	163	158	160	167	102	0h>24h
Ankrd28	1579.24	1.15657	0.232225	4.9804	6.3452e-07	9.36429e-06	2392	2181	2251	1612	1839	1789	1078	1058	717	24h>0h
Fth1	8411.23	-0.67393	0.13532	-4.98027	6.34952e-07	9.36429e-06	6580	6606	7105	6318	7400	6962	8189	10854	11809	0h>24h
Ankrd13b	223.426	0.958147	0.192391	4.9802	6.35197e-07	9.36429e-06	308	298	318	372	436	316	118	156	179	24h>0h
Usp11	1751.63	-0.670615	0.134693	-4.97883	6.3969e-07	9.41824e-06	1514	1368	1347	707	1044	805	1834	2280	2277	0h>24h
Zbtb39	160.084	-1.10518	0.221974	-4.9789	6.39461e-07	9.41824e-06	123	100	95	134	160	108	181	221	248	0h>24h
Muc3a	45.8289	-1.68706	0.339044	-4.97594	6.49332e-07	9.55397e-06	24	22	22	13	16	10	58	72	78	0h>24h
Marc2	655.395	-0.8554	0.171972	-4.97406	6.55634e-07	9.64042e-06	510	457	495	408	523	389	629	886	1012	0h>24h
Tkt	1249.93	-0.90769	0.182555	-4.97214	6.62171e-07	9.73021e-06	868	854	1003	638	732	650	1127	1840	1938	0h>24h
Sel1l	2251.45	0.713831	0.143605	4.9708	6.66778e-07	9.79154e-06	3159	2748	2851	3078	4011	3283	1593	1765	1677	24h>0h
AI467606	28.1486	-2.52567	0.508136	-4.97046	6.67953e-07	9.80243e-06	4	12	10	17	9	3	34	55	55	0h>24h
Zfp703	721.701	-1.11986	0.225319	-4.97012	6.69107e-07	9.81299e-06	483	518	418	264	326	277	640	1125	1218	0h>24h
Cebpd	107.029	1.47295	0.296413	4.96925	6.72121e-07	9.85081e-06	154	157	182	140	190	174	48	42	78	24h>0h
Mafa	151.166	1.31784	0.265222	4.96882	6.7363e-07	9.86651e-06	246	166	268	82	113	102	68	81	109	24h>0h
2010300C02Rik	438.973	-1.14414	0.23029	-4.96825	6.75592e-07	9.88885e-06	348	222	290	455	606	399	410	684	726	0h>24h
Fbxo17	125.903	-1.3021	0.26212	-4.96757	6.77959e-07	9.91706e-06	77	83	67	65	67	74	122	206	211	0h>24h
Osbp2	110.105	1.27164	0.256069	4.96599	6.83509e-07	9.99179e-06	167	159	162	139	180	141	42	78	74	24h>0h
Map2k4	1000.04	-1.03853	0.209175	-4.9649	6.87376e-07	1.00418e-05	680	669	700	712	846	863	1432	1419	1082	0h>24h
Pcbd1	67.4335	-1.50728	0.303601	-4.96468	6.88136e-07	1.00464e-05	44	34	32	13	13	26	74	117	108	0h>24h
Edn1	16.9722	5.63648	1.13549	4.96391	6.90877e-07	1.00799e-05	30	38	36	27	44	29	0	1	1	24h>0h
Maml3	286.787	-1.02752	0.207146	-4.96037	7.03583e-07	1.02587e-05	221	196	173	122	140	138	335	460	348	0h>24h
Adgre5	272.245	-0.870869	0.175573	-4.96016	7.04348e-07	1.02632e-05	215	174	215	242	236	255	301	386	359	0h>24h
Asb13	44.5763	-1.77248	0.357415	-4.95917	7.07947e-07	1.0309e-05	18	23	22	43	35	17	67	71	65	0h>24h
Gadd45g	170.341	1.10274	0.222374	4.95891	7.08895e-07	1.03162e-05	247	201	283	207	325	192	87	131	105	24h>0h
Map4	6471.6	0.667765	0.134676	4.95832	7.1104e-07	1.03407e-05	8957	8025	7869	7853	10144	8038	4054	5492	5358	24h>0h
Ddx41	2411.41	0.909805	0.183511	4.95776	7.13119e-07	1.03643e-05	3352	2948	3575	3967	4739	4054	1185	1732	2111	24h>0h
Ndor1	1221.56	0.717511	0.144741	4.95721	7.15144e-07	1.0387e-05	1605	1596	1549	1689	2172	1831	773	934	1039	24h>0h
F2r	934.043	-0.913133	0.184238	-4.95627	7.18599e-07	1.04305e-05	642	662	724	1039	1118	1225	1233	1286	1063	0h>24h
Nkx3-1	649.611	0.787044	0.158879	4.95373	7.28028e-07	1.05606e-05	949	760	871	737	932	790	378	511	533	24h>0h
Lppr1	169.517	1.09377	0.220851	4.95252	7.32572e-07	1.06197e-05	243	196	287	154	139	152	94	110	117	24h>0h
Gltp	1079.79	-0.858466	0.173364	-4.95181	7.3527e-07	1.0652e-05	835	789	778	482	655	519	989	1585	1607	0h>24h
Prdm6	31.022	-2.1986	0.444077	-4.95094	7.38556e-07	1.06927e-05	12	7	16	19	31	20	41	54	57	0h>24h
Psmd12	2691.49	-0.617271	0.124765	-4.94748	7.51802e-07	1.08775e-05	2214	2052	2393	2181	2523	2342	2873	3355	3428	0h>24h
Polr3a	2089.93	0.623936	0.126281	4.94085	7.77826e-07	1.12469e-05	2780	2545	2609	2983	3928	3314	1419	1726	1737	24h>0h
Cct2	17896.2	-0.684095	0.138577	-4.93656	7.95137e-07	1.14898e-05	14250	13093	15719	12597	15812	13146	18719	21646	25133	0h>24h
Nuak1	554.531	0.785962	0.159286	4.93428	8.04457e-07	1.16097e-05	765	705	728	735	806	664	311	449	457	24h>0h
Slc22a17	415.413	0.886521	0.179663	4.93436	8.04142e-07	1.16097e-05	626	481	586	546	670	572	222	319	331	24h>0h
Col4a6	20.9532	3.12484	0.633391	4.9335	8.0768e-07	1.16487e-05	26	41	51	81	114	57	2	7	4	24h>0h
Ttyh1	134.181	1.1487	0.233154	4.92676	8.36047e-07	1.20502e-05	191	169	221	192	227	200	64	85	100	24h>0h
Ckap4	1354.72	0.893208	0.181319	4.92616	8.38617e-07	1.20795e-05	1766	1793	1956	2098	2444	2035	685	967	1190	24h>0h
Rhebl1	273.319	-1.18836	0.241359	-4.92361	8.49637e-07	1.2216e-05	181	148	195	141	219	104	239	433	476	0h>24h
Triml1	47.3542	-1.85744	0.377253	-4.92359	8.49715e-07	1.2216e-05	22	21	21	26	20	9	76	87	55	0h>24h
1700067K01Rik	59.4939	2.24608	0.456168	4.9238	8.48776e-07	1.2216e-05	121	86	102	74	126	103	8	17	38	24h>0h
Hspb1	176.362	1.27396	0.258779	4.92297	8.52387e-07	1.22466e-05	233	238	313	322	271	346	65	114	132	24h>0h
Clybl	210.417	-1.00101	0.203406	-4.92124	8.59968e-07	1.23477e-05	169	122	149	122	175	172	245	280	307	0h>24h
Magea2	343.463	-0.882973	0.179452	-4.9204	8.63695e-07	1.23933e-05	242	227	289	215	246	213	365	527	436	0h>24h
Srrm3	34.2417	2.12619	0.432211	4.91933	8.68397e-07	1.24529e-05	53	52	70	24	34	24	11	18	9	24h>0h
Rapgef2	1980.79	-0.841974	0.171247	-4.91671	8.80092e-07	1.26126e-05	1514	1509	1410	1622	2083	1686	2420	2856	2227	0h>24h
Gna15	75.5785	-1.59899	0.325262	-4.91602	8.8323e-07	1.26496e-05	36	47	34	26	39	34	79	114	148	0h>24h
Gdi1	1074.53	-0.694103	0.141427	-4.90784	9.20832e-07	1.31797e-05	899	850	818	753	812	820	1169	1439	1330	0h>24h
Glb1l3	22.6585	-2.97653	0.606882	-4.90462	9.36061e-07	1.33892e-05	4	6	6	3	1	7	30	64	27	0h>24h
Pck2	411.827	1.06179	0.216559	4.903	9.43861e-07	1.34923e-05	555	564	626	468	537	422	172	294	338	24h>0h
Baz1b	8078.84	0.613942	0.125341	4.89818	9.67293e-07	1.38185e-05	10422	9837	10333	8646	10502	9165	5206	7369	6463	24h>0h
Ptn	28.2355	2.78226	0.568381	4.89506	9.82754e-07	1.40235e-05	46	74	32	310	301	292	8	6	7	24h>0h
Dym	1604.95	-0.679956	0.138907	-4.89503	9.82887e-07	1.40235e-05	1318	1280	1260	1325	1678	1554	1698	1982	2184	0h>24h
Rsph3b	529.445	-1.38448	0.283192	-4.88883	1.01438e-06	1.44636e-05	287	228	410	340	349	327	505	714	1085	0h>24h
C1qtnf3	39.3706	2.4908	0.509847	4.88538	1.0323e-06	1.471e-05	74	72	62	252	286	347	19	10	5	24h>0h
Ing2	722.366	-0.742838	0.15208	-4.88451	1.03687e-06	1.47657e-05	523	574	593	415	502	361	814	963	900	0h>24h
Entpd3	219.522	-0.935123	0.191535	-4.88226	1.04878e-06	1.4926e-05	152	145	176	113	138	171	225	314	322	0h>24h
Ick	697.37	-0.751817	0.154165	-4.87672	1.07865e-06	1.53413e-05	523	574	526	639	664	564	754	950	894	0h>24h
Matn1	23.0418	-2.63103	0.539671	-4.87526	1.08667e-06	1.54457e-05	8	8	4	4	9	11	28	41	50	0h>24h
Btg1-ps2	14.6016	6.31084	1.29562	4.87091	1.11086e-06	1.57796e-05	30	34	26	29	39	28	0	1	0	24h>0h
Gmpr2	433.444	0.811076	0.166574	4.86918	1.12065e-06	1.59087e-05	569	503	662	527	690	601	263	332	341	24h>0h
Acap1	41.6324	-1.77954	0.365629	-4.86706	1.13272e-06	1.60599e-05	24	15	20	8	13	8	54	74	64	0h>24h
Ifi35	114.017	1.20022	0.246598	4.86711	1.13241e-06	1.60599e-05	152	175	169	93	157	96	67	74	63	24h>0h
P2rx7	63.3315	-1.47875	0.304103	-4.86266	1.15821e-06	1.6411e-05	41	29	35	75	81	84	74	95	109	0h>24h
Mthfsd	200.443	-1.07173	0.220587	-4.85856	1.18241e-06	1.67433e-05	114	156	133	151	175	177	232	303	272	0h>24h
Gm10762	44.6744	1.89485	0.390027	4.85826	1.18421e-06	1.67583e-05	98	57	66	42	62	53	18	20	18	24h>0h
Ybx3	1924.17	-0.860057	0.177067	-4.85725	1.19027e-06	1.68335e-05	1380	1383	1518	1439	1752	1399	1875	2422	3120	0h>24h
H6pd	439.956	0.74224	0.15294	4.85316	1.21513e-06	1.71744e-05	598	540	587	643	629	586	279	340	359	24h>0h
Fer1l4	92.5272	1.22759	0.252962	4.85288	1.21679e-06	1.71872e-05	147	130	129	96	146	82	44	59	62	24h>0h
Ppard	765.208	-0.926316	0.190936	-4.85144	1.2257e-06	1.73021e-05	601	567	480	566	721	460	754	1049	1197	0h>24h
Hoxc6	22.9829	2.85518	0.588606	4.85075	1.22993e-06	1.73511e-05	37	41	49	59	52	54	1	7	9	24h>0h
Fam13c	64.5055	-1.80358	0.372002	-4.84829	1.24528e-06	1.75567e-05	26	28	36	15	28	30	102	127	66	0h>24h
Nipsnap3b	402.134	0.803446	0.165735	4.84779	1.24848e-06	1.75907e-05	560	487	556	519	685	542	246	345	281	24h>0h
Coro1a	415.924	-1.39488	0.287824	-4.84628	1.25797e-06	1.77135e-05	234	221	264	121	147	130	312	686	838	0h>24h
Vim	2144.64	1.09607	0.226179	4.84603	1.25957e-06	1.77249e-05	2408	3075	3669	3062	2896	3499	1326	1137	1553	24h>0h
Fgd1	1893	-0.940843	0.194159	-4.84574	1.26144e-06	1.77395e-05	1444	1415	1189	1213	1639	1250	1820	2556	3082	0h>24h
Cnksr1	122.479	-1.23678	0.255237	-4.84562	1.26217e-06	1.77395e-05	87	68	74	70	71	67	119	191	207	0h>24h
Sntg2	53.6597	1.5436	0.318621	4.84463	1.26845e-06	1.78157e-05	91	78	81	57	89	67	26	27	28	24h>0h
2700081O15Rik	1254	1.06873	0.220611	4.8444	1.26996e-06	1.78157e-05	1867	1640	1816	1782	2388	1504	489	942	1020	24h>0h
Gm41	947.339	0.760365	0.156957	4.84441	1.2699e-06	1.78157e-05	1220	1103	1417	1241	1583	1316	584	827	684	24h>0h
Prr15	81.3308	-1.39431	0.287855	-4.84378	1.27391e-06	1.786e-05	55	37	49	15	52	20	84	138	132	0h>24h
Lrrc38	26.511	-3.21992	0.66501	-4.84192	1.28589e-06	1.80168e-05	10	6	0	4	7	1	33	55	56	0h>24h
Rnf111	843.315	-0.968376	0.200012	-4.84158	1.28812e-06	1.80368e-05	615	619	547	735	897	790	1140	1180	954	0h>24h
Tspan31	417.723	-0.872044	0.180131	-4.84117	1.29079e-06	1.80631e-05	310	261	356	280	314	297	496	523	577	0h>24h
Scap	3304.29	0.880426	0.181895	4.8403	1.29645e-06	1.81311e-05	4786	4058	4581	4554	6046	4981	1667	2367	2942	24h>0h
Mknk1	488.466	0.705328	0.145844	4.83618	1.32357e-06	1.84989e-05	635	597	665	606	806	623	318	396	389	24h>0h
Tnfrsf8	56.6414	-1.59178	0.32925	-4.83456	1.33441e-06	1.86376e-05	26	36	26	11	23	16	66	95	93	0h>24h
Msn	2767.62	-0.622411	0.128745	-4.83445	1.33514e-06	1.86376e-05	2192	2254	2375	1975	2366	2356	2906	3738	3319	0h>24h
Gas2l3	369.401	-1.55214	0.321373	-4.82973	1.36719e-06	1.90732e-05	195	223	167	272	315	300	596	695	321	0h>24h
Rac3	265.745	-1.14976	0.238255	-4.82576	1.39467e-06	1.94397e-05	178	146	195	192	233	183	244	382	477	0h>24h
Gareml	766.079	-0.879835	0.182323	-4.82569	1.39519e-06	1.94397e-05	562	594	529	550	774	565	721	1092	1164	0h>24h
Cmtm4	2021.94	-0.650347	0.134779	-4.82528	1.39809e-06	1.94682e-05	1789	1552	1586	1442	1755	1507	2088	2743	2514	0h>24h
Mid1ip1	132.519	-1.27716	0.26483	-4.82257	1.41718e-06	1.97218e-05	76	76	91	98	82	82	121	210	235	0h>24h
Akt1	2563.78	0.932226	0.19335	4.82145	1.42517e-06	1.98208e-05	3674	3215	3658	3125	3848	2969	1259	1721	2306	24h>0h
Polr1a	1870.36	0.651197	0.135083	4.82073	1.43036e-06	1.98807e-05	2624	2168	2370	3067	3889	3373	1273	1544	1499	24h>0h
Il1rl2	22.1843	2.7561	0.571781	4.82021	1.4341e-06	1.99205e-05	52	25	45	50	48	49	5	6	6	24h>0h
Pex26	745.761	0.848579	0.176112	4.81841	1.44706e-06	2.00882e-05	1061	936	1008	792	977	772	374	613	613	24h>0h
Pea15a	493.082	-1.05253	0.218518	-4.81669	1.45959e-06	2.02496e-05	319	304	384	434	545	420	433	744	830	0h>24h
Galnt3	213.68	-1.13683	0.236171	-4.81357	1.48255e-06	2.05555e-05	141	146	130	182	193	177	293	333	238	0h>24h
Tnfrsf11b	15.8102	5.51589	1.14602	4.81307	1.48631e-06	2.05952e-05	25	31	41	29	50	28	1	1	0	24h>0h
Krt83	18.1599	-3.53377	0.734329	-4.81224	1.49246e-06	2.06677e-05	2	5	2	8	3	3	16	37	49	0h>24h
Golga7b	26.1688	-2.35039	0.488549	-4.81095	1.50213e-06	2.07888e-05	7	8	12	3	2	7	29	53	50	0h>24h
Fam178b	730.302	0.743773	0.154699	4.80788	1.52543e-06	2.10983e-05	1018	881	967	906	1112	1069	438	651	541	24h>0h
Fa2h	79.6067	1.62949	0.339064	4.80585	1.54099e-06	2.13005e-05	150	128	98	98	120	100	24	40	53	24h>0h
Flnb	3922.63	-0.677208	0.140951	-4.80457	1.55081e-06	2.14231e-05	3304	3100	3038	3287	4049	3372	3743	5494	5194	0h>24h
Rbm47	29.9375	-2.0711	0.431232	-4.80275	1.56504e-06	2.15933e-05	15	11	10	8	13	7	44	49	50	0h>24h
Tcerg1l	32.7528	2.21036	0.460223	4.80281	1.56457e-06	2.15933e-05	63	63	42	41	81	39	7	16	12	24h>0h
Hbb-bt	9.02481	6.5967	1.37363	4.80239	1.56786e-06	2.1619e-05	19	13	25	0	2	0	0	0	0	24h>0h
Slc8a1	40.9916	2.02998	0.422871	4.80047	1.58292e-06	2.18134e-05	56	66	84	95	108	99	20	16	11	24h>0h
Aff1	939.127	-0.7775	0.162066	-4.79742	1.60724e-06	2.2135e-05	727	757	677	902	1199	888	1053	1346	1118	0h>24h
Cphx1	8.99821	6.58946	1.3741	4.79547	1.62297e-06	2.2338e-05	14	23	19	19	29	22	0	0	0	24h>0h
Rhox10	279.843	1.05079	0.219221	4.7933	1.6406e-06	2.25669e-05	327	369	489	448	581	469	139	211	195	24h>0h
Gprasp2	768.361	0.787653	0.164455	4.78948	1.6721e-06	2.29863e-05	1042	989	1014	820	949	788	493	674	507	24h>0h
Hrh1	203.19	0.948222	0.198041	4.78801	1.68439e-06	2.31412e-05	311	264	263	238	338	298	113	147	153	24h>0h
Mab21l3	47.8356	1.62431	0.339342	4.78665	1.69587e-06	2.32847e-05	79	65	83	68	120	79	18	29	23	24h>0h
Serpine2	1459.83	0.785586	0.164158	4.78555	1.70516e-06	2.33875e-05	1807	1917	2058	2804	3082	3006	1000	985	1176	24h>0h
A730049H05Rik	14.5689	6.30663	1.31786	4.78552	1.70543e-06	2.33875e-05	28	19	44	18	23	15	1	0	0	24h>0h
Rgs10	236.519	1.19219	0.249289	4.78236	1.73252e-06	2.37447e-05	324	317	392	226	322	260	87	161	187	24h>0h
C330006A16Rik	951.744	0.980944	0.205314	4.77778	1.77239e-06	2.42764e-05	1275	1272	1411	1089	1466	969	407	748	778	24h>0h
Chd4	20288.9	-0.678008	0.141923	-4.77731	1.77659e-06	2.43192e-05	17236	15215	16439	13799	17000	14072	18850	27778	28126	0h>24h
Entpd2	103.778	1.32979	0.278487	4.77505	1.7966e-06	2.45782e-05	150	158	157	97	81	78	36	66	76	24h>0h
Ebf3	227.519	0.902115	0.188975	4.77373	1.80844e-06	2.47252e-05	327	301	299	540	736	588	145	156	168	24h>0h
Apol7e	22.0654	-2.73927	0.573888	-4.77318	1.81337e-06	2.47776e-05	7	4	7	1	5	5	46	34	31	0h>24h
Slc25a14	229.524	0.907615	0.190163	4.77283	1.81655e-06	2.48061e-05	333	308	295	280	311	299	147	167	158	24h>0h
Tmem35	28.4473	2.31277	0.485288	4.76576	1.88141e-06	2.56763e-05	45	49	54	44	64	73	11	12	5	24h>0h
Gm5873	105.908	-1.8478	0.387893	-4.76369	1.90084e-06	2.59258e-05	42	49	53	48	73	52	163	90	232	0h>24h
Gm26872	20.4109	-3.15339	0.662146	-4.76238	1.91321e-06	2.60787e-05	8	2	3	5	4	0	22	36	53	0h>24h
Itpr2	77.7437	-1.31208	0.275584	-4.76108	1.92555e-06	2.62312e-05	41	43	56	46	49	44	97	124	108	0h>24h
Nipal3	396.447	0.821475	0.172686	4.75704	1.96448e-06	2.67454e-05	574	467	548	488	590	528	218	326	313	24h>0h
Gtf2i	4605.74	0.633822	0.133289	4.75525	1.98204e-06	2.69682e-05	6144	5601	5789	5085	6634	5163	3126	3578	4001	24h>0h
Elovl5	2843.89	-0.583203	0.12269	-4.75348	1.9994e-06	2.7188e-05	2426	2303	2397	2321	2856	2497	3005	3522	3581	0h>24h
Hmox1	2300.1	-0.775888	0.163239	-4.75308	2.00346e-06	2.72268e-05	1724	1732	1854	1290	1768	1414	2076	3324	3322	0h>24h
U2af1	2177.32	-0.697763	0.146944	-4.74851	2.0492e-06	2.78317e-05	1668	1631	1907	1292	1690	1337	2048	3036	2978	0h>24h
Wars	1203.84	0.729308	0.153592	4.74834	2.05091e-06	2.78382e-05	1681	1436	1590	1335	1633	1306	715	926	1061	24h>0h
Piwil2	12707	0.654502	0.137927	4.74528	2.08221e-06	2.8246e-05	17221	15112	16351	16589	20879	17386	8159	9840	11366	24h>0h
Pla2g2d	103.087	-1.19335	0.25192	-4.73704	2.16867e-06	2.94013e-05	71	57	69	46	59	49	105	159	166	0h>24h
Zfp653	309.696	1.01993	0.215342	4.7363	2.1765e-06	2.94898e-05	449	413	438	472	578	457	131	244	242	24h>0h
Gm364	1583.7	-0.726708	0.153462	-4.73541	2.1861e-06	2.96021e-05	1174	1123	1447	1128	1369	1244	1801	2120	1919	0h>24h
Rnf181	815.06	0.763085	0.161168	4.73473	2.19347e-06	2.96841e-05	1104	932	1185	1041	1255	1118	457	689	663	24h>0h
Fibin	13.2066	6.16616	1.30319	4.7316	2.22753e-06	3.01269e-05	25	24	33	36	53	44	0	1	0	24h>0h
Gm27238	8.11862	-6.52385	1.37883	-4.73145	2.22925e-06	3.01321e-05	0	0	0	1	0	1	15	18	15	0h>24h
Hivep1	590.451	-0.98632	0.208552	-4.72938	2.25206e-06	3.04223e-05	430	393	417	412	498	417	785	902	621	0h>24h
Plxnb1	1026.72	-0.780452	0.165055	-4.72844	2.26248e-06	3.05448e-05	817	758	791	600	843	602	940	1460	1494	0h>24h
2810417H13Rik	1244.66	-0.818005	0.173017	-4.72789	2.2686e-06	3.06092e-05	904	868	1053	628	767	716	1493	1817	1382	0h>24h
Gdpgp1	262.073	0.885802	0.187363	4.72774	2.27037e-06	3.06148e-05	374	353	337	395	475	407	142	215	193	24h>0h
Abhd2	2500.69	-0.582936	0.123358	-4.72556	2.29488e-06	3.09268e-05	2186	2012	2069	1620	1960	1775	2556	3281	3075	0h>24h
Scn4b	16.3996	-3.37921	0.71513	-4.7253	2.29772e-06	3.09467e-05	5	3	1	0	5	2	20	30	40	0h>24h
Suclg2	895.336	0.624947	0.132263	4.72501	2.30099e-06	3.09722e-05	1146	1103	1151	898	1185	998	598	753	742	24h>0h
2410004I01Rik	32.8275	-1.9549	0.413854	-4.72365	2.31653e-06	3.11629e-05	12	16	14	8	19	19	48	48	58	0h>24h
Adamts1	105.829	1.36734	0.289479	4.72344	2.3189e-06	3.11761e-05	155	156	166	316	344	313	61	72	41	24h>0h
Mfsd4	556.622	-0.982267	0.207964	-4.72326	2.32095e-06	3.11852e-05	399	373	399	342	382	426	764	805	598	0h>24h
Mkrn1	1893.31	-0.895688	0.189719	-4.72112	2.34548e-06	3.1496e-05	1400	1276	1474	1119	1413	1063	1737	2492	3163	0h>24h
Supt20-ps	253.856	1.02955	0.218092	4.72069	2.3505e-06	3.15447e-05	402	359	304	344	378	307	124	201	175	24h>0h
Ahr	311.024	1.33422	0.282908	4.71609	2.40417e-06	3.22459e-05	445	480	466	432	456	478	208	188	117	24h>0h
Vdac1	1094.53	-0.816252	0.173104	-4.71538	2.41261e-06	3.23399e-05	714	781	992	637	726	656	1139	1463	1556	0h>24h
Crybb1	14.0856	-4.40276	0.933894	-4.71441	2.42409e-06	3.24552e-05	1	1	2	2	2	1	17	21	43	0h>24h
Iqsec2	480.315	-0.895679	0.189986	-4.71445	2.42365e-06	3.24552e-05	377	364	308	371	463	335	467	699	705	0h>24h
Gngt2	50.4593	-2.76174	0.585864	-4.71397	2.42942e-06	3.25074e-05	27	5	9	17	25	7	39	117	114	0h>24h
Krt24	15.4719	-3.46497	0.735463	-4.71128	2.46167e-06	3.28999e-05	4	3	1	3	4	5	30	31	22	0h>24h
Wipf1	207.83	-1.05109	0.223101	-4.7113	2.46147e-06	3.28999e-05	152	155	115	215	251	203	226	321	289	0h>24h
Zfp663	41.9428	-1.69023	0.358866	-4.70991	2.47826e-06	3.31021e-05	21	23	18	19	16	10	51	72	68	0h>24h
Tm2d3	845.437	-0.800761	0.170022	-4.70976	2.48008e-06	3.31067e-05	688	552	696	609	771	605	884	1039	1272	0h>24h
3010003L21Rik	83.7873	1.6165	0.343258	4.70929	2.48581e-06	3.31637e-05	139	159	95	134	157	120	27	54	43	24h>0h
Timd2	12.8502	-6.2116	1.31935	-4.70807	2.5007e-06	3.33196e-05	0	1	0	1	1	0	15	33	29	0h>24h
Arxes2	212.982	0.977972	0.207723	4.70807	2.50075e-06	3.33196e-05	283	263	341	277	372	330	116	140	171	24h>0h
Gm25287	9.41113	6.6556	1.41369	4.70797	2.50192e-06	3.33196e-05	9	21	29	37	29	59	0	0	0	24h>0h
Plxna4	50.6952	2.01542	0.428194	4.7068	2.51637e-06	3.34923e-05	70	86	99	64	62	91	11	35	15	24h>0h
Cyb5b	1599.35	-0.602642	0.128054	-4.70617	2.5242e-06	3.35767e-05	1342	1268	1367	1182	1470	1237	1692	2128	1901	0h>24h
Ddx60	65.0417	2.12913	0.452561	4.70462	2.54342e-06	3.38125e-05	104	104	123	74	74	91	37	21	11	24h>0h
Itpkb	180.436	-1.25169	0.266144	-4.70306	2.5629e-06	3.40472e-05	108	91	137	123	147	119	160	292	316	0h>24h
Tmem158	919.51	-1.40295	0.298312	-4.70297	2.56409e-06	3.40472e-05	514	515	551	330	422	344	659	1433	1978	0h>24h
Brsk2	1359.47	-0.770805	0.163945	-4.70162	2.5811e-06	3.4253e-05	1125	1005	1015	966	1115	963	1280	1828	2024	0h>24h
Vcan	285.712	2.14209	0.455757	4.70008	2.60059e-06	3.44914e-05	375	545	533	659	438	727	173	72	50	24h>0h
Serpinb2	76.9876	-2.12594	0.452413	-4.69912	2.61282e-06	3.46333e-05	17	29	44	23	48	42	150	142	71	0h>24h
Ddr2	138.866	1.49298	0.317748	4.69862	2.61929e-06	3.46962e-05	194	240	204	308	300	361	89	72	50	24h>0h
Tlr12	18.1265	-3.08039	0.655611	-4.69851	2.62064e-06	3.46962e-05	7	3	2	7	4	5	28	27	41	0h>24h
Dcaf8	3140.79	-0.71028	0.151206	-4.69745	2.63434e-06	3.48572e-05	2674	2268	2527	1815	2220	1818	2960	4165	4537	0h>24h
Pla2g4d	22.8372	-2.38335	0.507893	-4.69263	2.6972e-06	3.56681e-05	9	8	6	4	6	6	28	47	40	0h>24h
Hck	139.335	1.01402	0.216139	4.69153	2.71169e-06	3.57621e-05	209	167	209	149	213	171	80	98	96	24h>0h
Ube2z	4876.88	-0.81008	0.172658	-4.69183	2.70769e-06	3.57621e-05	3883	3319	3909	3786	5008	3870	4427	6617	7599	0h>24h
Spocd1	276.187	-1.13649	0.242233	-4.69172	2.70919e-06	3.57621e-05	181	165	196	213	267	246	232	445	472	0h>24h
Srpx2	25.7563	2.68813	0.57298	4.69149	2.71222e-06	3.57621e-05	46	56	37	68	57	90	2	7	12	24h>0h
Gnaz	1036.9	0.803067	0.17116	4.6919	2.70676e-06	3.57621e-05	1520	1240	1373	1066	1475	1058	557	809	897	24h>0h
Rassf2	114.114	-1.06493	0.227027	-4.69078	2.7217e-06	3.58661e-05	74	76	81	53	60	48	134	158	166	0h>24h
Cphx2	8.35407	6.4823	1.38233	4.68939	2.74015e-06	3.60882e-05	14	21	17	18	32	21	0	0	0	24h>0h
Tomm20	3260.75	-0.771153	0.16448	-4.68844	2.75302e-06	3.62366e-05	2596	2175	2794	2713	3497	2814	3766	3763	4610	0h>24h
Medag	33.339	2.035	0.434413	4.68449	2.80654e-06	3.69196e-05	56	42	71	26	14	34	10	12	17	24h>0h
Stmn1	7863.97	1.05447	0.225128	4.68388	2.81488e-06	3.70078e-05	11838	9602	11885	8644	11177	8423	3143	5495	6816	24h>0h
C130074G19Rik	42.937	-2.02842	0.433358	-4.6807	2.85903e-06	3.75664e-05	27	15	11	10	11	12	46	86	76	0h>24h
Atl2	1471.09	-0.975468	0.208417	-4.68037	2.86351e-06	3.76033e-05	1024	990	1092	1264	1293	1238	2064	2102	1540	0h>24h
Hc	36.1142	-2.5067	0.535618	-4.68001	2.86867e-06	3.76274e-05	11	7	16	15	11	21	78	66	33	0h>24h
Mfap3l	59.1525	1.46207	0.312404	4.68007	2.86774e-06	3.76274e-05	89	76	108	136	149	137	25	37	32	24h>0h
Sh3bp5	109.982	1.33531	0.285358	4.67944	2.87658e-06	3.77093e-05	151	144	200	189	210	171	53	84	49	24h>0h
Ltbp3	352.239	0.798944	0.17091	4.67465	2.94457e-06	3.85781e-05	457	448	496	464	579	508	220	250	293	24h>0h
Dctd	1330.84	-0.7079	0.151486	-4.67305	2.96763e-06	3.8856e-05	1084	947	1140	1171	1502	1169	1247	1906	1791	0h>24h
Pard3b	55.9213	1.64115	0.351202	4.67294	2.96922e-06	3.8856e-05	106	68	92	116	152	113	28	31	21	24h>0h
Mon1b	625.686	0.766822	0.164114	4.6725	2.97556e-06	3.89165e-05	887	773	809	671	863	749	348	542	497	24h>0h
Man2b1	2027.6	0.699393	0.149727	4.67113	2.99543e-06	3.91406e-05	2730	2523	2603	2080	2515	2273	1204	1594	1816	24h>0h
Bad	186.198	1.13878	0.243793	4.67108	2.99616e-06	3.91406e-05	318	204	284	204	243	197	86	121	141	24h>0h
Rps15a	11272.3	-0.718347	0.15382	-4.67004	3.01141e-06	3.93171e-05	8448	7770	10553	9875	12925	12038	12362	13967	15205	0h>24h
Dmd	186.85	1.33088	0.285003	4.6697	3.0164e-06	3.93594e-05	277	249	312	350	420	384	129	100	79	24h>0h
Foxo6	1732.54	-1.29995	0.278625	-4.6656	3.07722e-06	4.013e-05	1113	1022	996	823	1128	786	1272	2738	3497	0h>24h
Arhgef26	157.149	1.01788	0.218203	4.66484	3.08862e-06	4.02553e-05	237	197	225	188	265	254	102	99	105	24h>0h
Zbtb42	80.4985	1.32129	0.28335	4.66311	3.11465e-06	4.05712e-05	133	118	109	95	109	109	32	56	50	24h>0h
Gm3512	188.386	-1.46185	0.313709	-4.65988	3.16388e-06	4.11887e-05	126	82	107	123	126	149	327	283	191	0h>24h
4930427A07Rik	777.432	0.789306	0.169528	4.65589	3.22582e-06	4.1971e-05	1116	914	1060	798	904	750	415	647	647	24h>0h
Ube2r2	977.698	0.695613	0.14942	4.65543	3.23301e-06	4.20403e-05	1241	1212	1334	1521	1799	1655	573	807	851	24h>0h
2900041M22Rik	89.0053	-1.34317	0.288596	-4.65414	3.25342e-06	4.22814e-05	53	61	43	46	46	34	92	148	143	0h>24h
Sptlc2	2861.3	-0.606925	0.130518	-4.65013	3.31723e-06	4.30858e-05	2371	2167	2574	1934	2467	2102	3034	3471	3731	0h>24h
Flii	2467.21	0.606081	0.13043	4.64679	3.37141e-06	4.37644e-05	3337	2757	3247	2716	3836	2898	1655	2057	2102	24h>0h
Ube2j1	1043.79	-0.636636	0.137022	-4.64623	3.38052e-06	4.38575e-05	822	791	949	870	1115	1025	1097	1350	1324	0h>24h
1700041M05Rik	14.1012	-5.44258	1.17176	-4.6448	3.40405e-06	4.41374e-05	0	0	2	0	0	1	20	38	25	0h>24h
Plcxd1	106.093	-1.45816	0.313964	-4.64437	3.41122e-06	4.42042e-05	78	58	41	29	48	50	108	188	172	0h>24h
Hba-a2	18.8279	4.09065	0.880799	4.64425	3.41311e-06	4.42042e-05	16	31	65	0	1	0	4	1	1	24h>0h
Zcrb1	1270.22	-0.655706	0.141204	-4.64367	3.42273e-06	4.43033e-05	1027	977	1086	1031	1260	1073	1346	1793	1477	0h>24h
Ckb	185.399	1.01288	0.218146	4.64315	3.43132e-06	4.43891e-05	238	243	297	269	284	282	89	134	145	24h>0h
Snd1	5665.01	-0.678918	0.14623	-4.64281	3.43698e-06	4.44369e-05	4648	4297	4700	3778	4908	3699	5549	6972	8269	0h>24h
Ada	86.0157	-1.2983	0.279817	-4.6398	3.4875e-06	4.50643e-05	55	49	52	67	69	58	83	138	147	0h>24h
Setd1b	465.097	-1.07022	0.230868	-4.63561	3.55886e-06	4.59602e-05	359	334	243	281	368	287	447	729	717	0h>24h
Sfxn3	90.3902	1.18523	0.255764	4.63409	3.58516e-06	4.62733e-05	125	118	151	168	166	153	48	62	54	24h>0h
Akirin1	2917.07	-0.599508	0.129436	-4.6317	3.62676e-06	4.67835e-05	2430	2331	2501	2094	2685	2473	3218	3555	3613	0h>24h
Htr2a	8.08722	6.43815	1.39072	4.62938	3.66769e-06	4.72845e-05	15	13	23	25	13	33	0	0	0	24h>0h
Tmem164	1517.67	-0.843454	0.182225	-4.62863	3.68084e-06	4.7427e-05	1232	1032	1141	1157	1401	1082	1348	2176	2338	0h>24h
Ppm1b	1018.47	-0.707638	0.152955	-4.62643	3.72016e-06	4.79064e-05	857	694	878	792	1050	797	994	1371	1407	0h>24h
Add3	1309.98	0.595641	0.128822	4.62375	3.76866e-06	4.85032e-05	1629	1571	1738	1677	2100	1693	914	1138	1043	24h>0h
Rab3a	561.703	-0.912566	0.197458	-4.62156	3.80858e-06	4.89892e-05	423	409	387	243	316	280	506	807	893	0h>24h
Bcas1	112.131	-1.33428	0.288857	-4.61916	3.85296e-06	4.95317e-05	56	76	67	69	114	79	103	201	181	0h>24h
St8sia6	113.935	-1.65783	0.358922	-4.61893	3.85733e-06	4.95598e-05	60	59	52	35	26	21	222	160	115	0h>24h
Acsl5	112.819	1.10543	0.239379	4.61792	3.87608e-06	4.97724e-05	156	146	181	145	131	168	66	81	65	24h>0h
Aacs	1478.22	-0.813804	0.176359	-4.61446	3.94112e-06	5.05788e-05	1162	1004	1197	831	1095	813	1337	2035	2286	0h>24h
Lacc1	237.471	0.829548	0.179894	4.61132	4.00118e-06	5.13205e-05	313	307	332	398	394	369	137	196	177	24h>0h
Slc6a17	256.576	1.01753	0.220681	4.61086	4.01005e-06	5.1405e-05	398	356	320	379	455	352	127	167	213	24h>0h
Tns3	2131.8	0.614423	0.133333	4.6082	4.06174e-06	5.20381e-05	2885	2574	2613	2639	3303	2724	1461	1865	1675	24h>0h
Sptbn4	76.6891	1.56503	0.339634	4.60799	4.06572e-06	5.20596e-05	155	90	116	39	70	37	23	48	46	24h>0h
Popdc3	44.9042	-1.62442	0.352563	-4.60747	4.07597e-06	5.21613e-05	22	19	28	39	34	22	64	64	72	0h>24h
Adamtsl1	19.1563	3.134	0.680981	4.60218	4.18083e-06	5.3473e-05	44	34	30	63	86	81	0	6	6	24h>0h
Ppp1ca	7697.95	-0.998707	0.217081	-4.60062	4.21232e-06	5.38452e-05	5745	4394	6003	4216	5037	3974	6701	10760	13468	0h>24h
Wls	172.763	1.26063	0.274049	4.60003	4.22432e-06	5.39681e-05	217	247	299	362	393	405	116	84	96	24h>0h
Hacd3	1904.72	-0.623484	0.135579	-4.59867	4.2519e-06	5.42898e-05	1570	1511	1613	1318	1618	1460	2071	2269	2494	0h>24h
Hcn3	119.166	1.12776	0.24526	4.59823	4.26102e-06	5.43755e-05	197	137	180	130	230	142	60	79	84	24h>0h
Fzd10	551.425	-1.05525	0.229524	-4.59754	4.275e-06	5.45231e-05	409	366	346	214	292	217	478	794	974	0h>24h
Sema3e	51.6231	1.57003	0.341552	4.59675	4.29136e-06	5.47009e-05	88	61	94	91	113	103	24	25	28	24h>0h
Lpl	33.4952	1.93451	0.420912	4.596	4.30675e-06	5.48661e-05	63	41	63	154	155	216	14	14	13	24h>0h
Scamp5	1538.05	-0.965515	0.210088	-4.59577	4.31163e-06	5.48974e-05	1071	1004	1192	629	856	691	1277	2361	2512	0h>24h
Ephb4	1991.65	0.80154	0.174528	4.59262	4.37722e-06	5.57012e-05	2843	2409	2682	1303	1761	1409	1042	1535	1779	24h>0h
Adamts10	819.182	-0.749696	0.163312	-4.59059	4.42003e-06	5.62143e-05	633	602	680	592	700	527	754	1149	1177	0h>24h
Tagln3	62.7034	-1.75559	0.382702	-4.58735	4.48913e-06	5.70609e-05	44	22	24	18	23	19	73	86	130	0h>24h
Mdga1	79.0602	1.21811	0.265719	4.58421	4.55703e-06	5.78914e-05	117	106	124	74	108	93	36	53	53	24h>0h
Selk	1945.37	-0.726799	0.158593	-4.58279	4.58811e-06	5.82535e-05	1647	1268	1690	1397	1872	1412	1937	2533	2762	0h>24h
Sgpp1	369.951	-0.955283	0.208562	-4.58033	4.64233e-06	5.89089e-05	264	206	322	367	406	384	473	482	482	0h>24h
Mical3	2206.06	0.675613	0.147513	4.58003	4.64902e-06	5.89606e-05	3163	2687	2642	2502	3190	2311	1376	1847	1840	24h>0h
Stk32c	108.447	1.17655	0.256899	4.57983	4.65347e-06	5.8984e-05	134	161	175	109	156	117	65	64	67	24h>0h
Pknox2	26.6632	2.38811	0.521633	4.57815	4.69104e-06	5.94269e-05	40	54	46	61	63	58	3	13	10	24h>0h
Itpka	135.19	1.18465	0.258772	4.57797	4.69502e-06	5.9444e-05	226	165	199	108	128	102	56	86	106	24h>0h
Mapk4	131.736	-1.07117	0.234192	-4.5739	4.78717e-06	6.05767e-05	87	82	97	95	98	72	177	185	163	0h>24h
Megf6	1098.68	-1.07654	0.23539	-4.57342	4.79818e-06	6.06821e-05	785	715	712	409	632	420	901	1610	1999	0h>24h
Arf2	622.35	0.712431	0.155939	4.56865	4.90871e-06	6.20453e-05	767	827	822	717	979	727	429	476	490	24h>0h
Zfp710	2654.57	-0.838982	0.183736	-4.56624	4.96547e-06	6.27275e-05	2152	1940	1863	2031	2791	1890	2349	3847	4049	0h>24h
Gng4	24.1328	2.3099	0.505978	4.56522	4.98977e-06	6.29993e-05	43	48	34	58	77	62	7	7	10	24h>0h
Dpysl5	1485.78	-0.860546	0.188527	-4.56458	5.00502e-06	6.31566e-05	1175	1128	994	701	941	669	1339	2175	2247	0h>24h
Zbtb7b	444.685	-1.33945	0.293517	-4.56344	5.03217e-06	6.34638e-05	252	214	327	204	224	168	334	749	859	0h>24h
Epb4.1l2	4700.39	0.606709	0.132995	4.56188	5.06965e-06	6.39007e-05	6032	5438	6320	5617	6632	5679	3098	4364	3637	24h>0h
Sec14l5	40.6199	2.09672	0.459746	4.56061	5.1005e-06	6.42538e-05	61	77	68	56	57	61	5	20	22	24h>0h
Adgrf1	83.0812	-1.23064	0.269968	-4.55845	5.15326e-06	6.48823e-05	54	53	48	52	53	62	113	118	112	0h>24h
Tbc1d16	759.662	-0.771747	0.169333	-4.55756	5.17516e-06	6.51218e-05	624	541	594	646	865	701	694	1089	1092	0h>24h
Itgb7	162.007	-1.03675	0.22761	-4.55493	5.24032e-06	6.5905e-05	101	104	128	74	86	90	174	211	264	0h>24h
Lmcd1	39.6014	2.5398	0.557664	4.55435	5.25485e-06	6.60509e-05	68	46	99	48	60	60	19	5	9	24h>0h
6330416G13Rik	343.133	0.80564	0.176924	4.55359	5.27378e-06	6.62521e-05	490	425	453	395	491	370	188	276	283	24h>0h
Cphx3	7.51235	6.33013	1.39181	4.54813	5.41258e-06	6.7958e-05	14	16	17	19	33	23	0	0	0	24h>0h
Klf12	22.2775	-2.84673	0.62624	-4.54576	5.47383e-06	6.86888e-05	4	5	8	10	1	18	52	36	24	0h>24h
Tmem55a	301.807	-0.878164	0.19322	-4.54488	5.49654e-06	6.89355e-05	209	217	240	284	272	264	338	474	350	0h>24h
Lrrc27	148.571	0.958287	0.211026	4.54109	5.59654e-06	7.01507e-05	191	204	219	211	233	193	85	104	111	24h>0h
Rhoj	50.8912	1.87842	0.41379	4.53954	5.63777e-06	7.06284e-05	76	101	72	121	98	136	15	16	34	24h>0h
Abcb9	113.318	1.03841	0.228771	4.53908	5.64991e-06	7.07413e-05	159	147	172	115	147	113	60	78	83	24h>0h
Sept9	1679.06	-0.803727	0.177073	-4.53896	5.65333e-06	7.07449e-05	1278	1211	1343	1091	1402	1137	1489	2336	2592	0h>24h
Pgam1	14185.2	-0.686812	0.151349	-4.53793	5.68088e-06	7.10503e-05	11171	10726	12165	8297	10134	8195	13548	17744	20967	0h>24h
Nfia	40.4323	1.68009	0.370244	4.53779	5.68456e-06	7.1057e-05	56	63	74	89	65	105	17	18	22	24h>0h
Atf5	314.086	1.0286	0.226704	4.5372	5.70053e-06	7.12172e-05	442	391	491	418	468	366	129	244	251	24h>0h
Psd2	264.279	-0.955431	0.210583	-4.53708	5.70392e-06	7.12202e-05	211	167	186	124	141	114	275	446	322	0h>24h
Hapln4	210.022	1.11912	0.246712	4.53615	5.72915e-06	7.14957e-05	337	275	290	136	167	134	84	179	137	24h>0h
Btf3l4	1201.66	-0.705232	0.155488	-4.53562	5.74353e-06	7.16356e-05	977	850	1039	900	997	843	1400	1618	1380	0h>24h
Gm14644	12.4577	4.55926	1.00558	4.53395	5.78911e-06	7.21643e-05	24	22	29	8	5	7	1	0	2	24h>0h
Zfp7	960.457	-0.688049	0.151761	-4.53377	5.79392e-06	7.21845e-05	793	743	767	797	1079	861	949	1422	1168	0h>24h
Ruvbl2	1978.73	-0.776198	0.171403	-4.52849	5.94061e-06	7.39712e-05	1563	1419	1590	1385	1675	1471	1831	2565	3089	0h>24h
Sos2	468.29	-1.2829	0.283493	-4.52531	6.03058e-06	7.5024e-05	279	296	277	453	554	589	727	792	420	0h>24h
Ppcdc	445.363	-0.713822	0.157741	-4.52527	6.0318e-06	7.5024e-05	353	337	367	319	397	318	434	631	588	0h>24h
Slc38a5	42.6668	2.04378	0.451756	4.52407	6.06613e-06	7.54095e-05	73	66	77	70	112	83	5	23	23	24h>0h
Nudt11	611.545	0.67496	0.149218	4.52331	6.08805e-06	7.56404e-05	757	745	855	647	869	670	377	527	501	24h>0h
Sez6	3114.03	-0.8373	0.185177	-4.52162	6.13677e-06	7.62039e-05	2497	2378	2107	240	306	226	2800	4473	4729	0h>24h
Naca	6218.68	-0.733978	0.162396	-4.51969	6.19315e-06	7.68618e-05	4578	4716	5334	5306	6804	6307	6208	9718	7284	0h>24h
Pthlh	12.7666	-3.91853	0.867651	-4.51626	6.29424e-06	7.80306e-05	2	0	3	4	2	1	22	29	20	0h>24h
Gm2274	998.761	0.982906	0.217636	4.5163	6.29306e-06	7.80306e-05	1478	1110	1585	1089	1432	1193	434	770	821	24h>0h
Sowahb	11.3107	-6.02287	1.33404	-4.51475	6.33905e-06	7.8543e-05	0	1	0	0	0	1	15	21	31	0h>24h
Faah	790.154	0.722434	0.160066	4.51335	6.38131e-06	7.90233e-05	1057	978	1047	893	1115	933	452	628	703	24h>0h
Edn2	14.3086	-3.35646	0.7437	-4.51319	6.38606e-06	7.90389e-05	1	2	5	5	7	3	24	24	29	0h>24h
Anxa6	580.197	0.810016	0.179513	4.51229	6.41302e-06	7.93291e-05	675	723	920	762	841	803	348	435	471	24h>0h
Cxcl14	240.671	1.44634	0.320635	4.51085	6.45694e-06	7.98287e-05	283	337	487	362	370	292	70	137	185	24h>0h
Afap1l2	81.7493	-1.3644	0.302492	-4.51053	6.46652e-06	7.99034e-05	62	33	49	66	65	85	93	140	119	0h>24h
Cd300lb	12.8686	-5.28719	1.17223	-4.51037	6.47137e-06	7.99197e-05	1	1	0	0	0	0	28	25	20	0h>24h
Wsb2	1946.5	-0.725366	0.160881	-4.50872	6.52197e-06	8.05005e-05	1498	1474	1623	1473	1788	1450	1996	2298	2919	0h>24h
Ern1	1012.34	-0.692861	0.153709	-4.50761	6.55631e-06	8.08802e-05	872	792	756	858	1034	867	1099	1411	1201	0h>24h
Gm6136	4411.54	-0.715681	0.15879	-4.50711	6.5718e-06	8.10271e-05	3136	3604	3701	3834	4669	5056	4369	5591	6390	0h>24h
Nrip1	120.648	1.48246	0.329175	4.50356	6.68257e-06	8.23479e-05	194	196	164	210	206	230	71	77	38	24h>0h
Fam65a	1566.94	-0.884493	0.196441	-4.5026	6.71276e-06	8.26749e-05	1280	1171	988	694	993	630	1467	2169	2461	0h>24h
Mmp3	46.1021	-2.02849	0.45056	-4.50216	6.72678e-06	8.28024e-05	24	12	21	33	55	48	94	65	54	0h>24h
Larp6	58.5698	1.53399	0.340733	4.50202	6.73094e-06	8.28086e-05	102	68	104	65	67	58	27	25	37	24h>0h
Gm17501	14.0974	3.25057	0.722122	4.50141	6.75048e-06	8.30038e-05	31	24	25	16	25	16	2	4	2	24h>0h
Hs3st4	23.1117	2.22155	0.49371	4.49971	6.80464e-06	8.36242e-05	42	37	40	29	38	30	9	8	7	24h>0h
Chst2	241.947	-0.992688	0.220813	-4.4956	6.93741e-06	8.52095e-05	167	166	174	110	161	187	218	352	399	0h>24h
Fam107b	1079.33	-0.687212	0.152875	-4.49524	6.94919e-06	8.53078e-05	887	845	855	707	937	789	1274	1336	1313	0h>24h
Zfp446	353.735	0.761701	0.169498	4.49387	6.99403e-06	8.58117e-05	493	449	450	360	543	432	240	262	274	24h>0h
Ghr	82.2476	1.36998	0.304978	4.49207	7.0534e-06	8.64931e-05	120	105	147	135	137	154	52	41	41	24h>0h
Lppr3	693.526	0.994356	0.221379	4.49164	7.06759e-06	8.66201e-05	984	890	1022	609	786	561	280	580	544	24h>0h
Asgr1	57.4413	-1.55226	0.34571	-4.49007	7.12008e-06	8.72161e-05	35	23	34	12	6	5	57	91	110	0h>24h
Scrn1	39.52	2.12814	0.474029	4.48948	7.13987e-06	8.74112e-05	56	41	107	74	93	119	11	16	17	24h>0h
Nrtn	374.413	1.30094	0.289785	4.48933	7.14491e-06	8.74255e-05	603	518	548	300	337	321	127	193	333	24h>0h
Ado	2314.26	-0.623838	0.139006	-4.48786	7.19412e-06	8.798e-05	1923	1699	2093	1423	1753	1488	2449	2784	3087	0h>24h
Defb19	8.35666	6.48299	1.44662	4.48149	7.41252e-06	9.06019e-05	7	23	22	20	15	13	0	0	0	24h>0h
Xaf1	101.134	1.55419	0.346849	4.48089	7.43318e-06	9.08053e-05	154	192	122	119	117	137	61	39	49	24h>0h
Zdhhc9	881.288	-0.693314	0.15475	-4.48022	7.45673e-06	9.10438e-05	698	727	679	740	971	811	1007	1097	1112	0h>24h
Trim21	493.733	0.696073	0.155405	4.4791	7.49581e-06	9.14716e-05	648	583	684	446	566	483	299	434	392	24h>0h
Zbtb7c	171.936	-0.964603	0.215366	-4.4789	7.50302e-06	9.15101e-05	122	130	112	96	106	128	176	244	259	0h>24h
Pif1	363.132	-0.734771	0.164173	-4.4756	7.61961e-06	9.2882e-05	306	267	281	257	386	331	364	503	486	0h>24h
Wdr76	1925.02	0.642768	0.143629	4.4752	7.63381e-06	9.2983e-05	2566	2280	2506	2303	2888	2486	1410	1611	1417	24h>0h
Rps15a-ps7	453.143	-0.854194	0.190875	-4.47514	7.63612e-06	9.2983e-05	357	276	381	396	512	489	565	553	599	0h>24h
Kazald1	17.1037	3.41378	0.76349	4.47128	7.77526e-06	9.46262e-05	25	26	48	24	33	36	0	6	3	24h>0h
Lbh	878.668	-0.825462	0.184635	-4.47078	7.79358e-06	9.47982e-05	554	658	774	602	715	706	856	1282	1224	0h>24h
Mbd3	1818.48	1.03787	0.232194	4.46983	7.82805e-06	9.51662e-05	2764	2182	2734	1878	2406	1648	726	1278	1598	24h>0h
Tenm4	193.864	-0.994687	0.222557	-4.46936	7.84551e-06	9.53272e-05	120	152	132	101	180	117	243	281	238	0h>24h
Pcsk1n	110.322	1.25571	0.280974	4.46914	7.85361e-06	9.53743e-05	181	147	160	124	196	130	41	67	88	24h>0h
Hmgxb4	1041.61	-0.68975	0.154346	-4.46885	7.86427e-06	9.54525e-05	842	732	928	819	943	832	1178	1415	1211	0h>24h
Kcns2	15.0708	3.5953	0.804618	4.46833	7.88314e-06	9.56302e-05	37	20	31	29	40	33	0	2	5	24h>0h
Magea8	664.614	-0.688804	0.154197	-4.46703	7.9314e-06	9.6164e-05	538	459	601	341	468	357	697	918	824	0h>24h
Gm12840	24.4549	2.23474	0.500506	4.46497	8.00809e-06	9.70417e-05	40	40	46	36	43	35	11	8	6	24h>0h
Cd274	211.266	1.10707	0.248035	4.46336	8.06833e-06	9.77193e-05	319	294	289	305	413	347	141	152	100	24h>0h
Dysf	174.952	-0.898105	0.201333	-4.4608	8.16546e-06	9.88428e-05	118	119	146	146	133	114	201	239	235	0h>24h
Tlr3	43.2782	-2.3865	0.53522	-4.45892	8.23744e-06	9.96607e-05	10	21	12	29	19	34	93	80	36	0h>24h
Tango2	644.588	0.771475	0.173053	4.45803	8.27174e-06	0.000100022	938	719	896	754	1013	817	366	504	553	24h>0h
Prim1	1655.97	-0.647181	0.145181	-4.45776	8.28221e-06	0.000100095	1281	1246	1520	1308	1521	1415	1861	2103	2009	0h>24h
Laptm4b	464.292	-0.853914	0.191682	-4.45486	8.39497e-06	0.000101404	305	345	385	421	480	447	581	556	621	0h>24h
Lmo4	407.036	0.745812	0.167479	4.45316	8.4617e-06	0.000102155	499	488	613	357	491	443	253	334	318	24h>0h
Izumo1r	72.2973	-1.3458	0.302309	-4.45175	8.51742e-06	0.000102773	41	43	44	13	9	18	68	127	118	0h>24h
Gmnn	1560.77	0.812129	0.182445	4.45137	8.53253e-06	0.0001029	2294	1676	2283	1953	2450	1787	851	1182	1356	24h>0h
St3gal4	391.844	0.780015	0.17531	4.44934	8.61347e-06	0.000103821	499	459	597	423	472	383	234	298	327	24h>0h
Mtx1	727.922	0.691923	0.155521	4.44907	8.62418e-06	0.000103895	915	879	1025	907	1053	872	437	582	642	24h>0h
Grm5	14.2982	3.46424	0.77905	4.44675	8.71773e-06	0.00010491	28	26	28	81	69	71	3	4	0	24h>0h
Pou3f1	3610.2	-1.18072	0.265523	-4.44677	8.71724e-06	0.00010491	2447	2055	2431	1042	1448	1070	2833	4991	7367	0h>24h
Tom1l2	672.833	0.81006	0.182217	4.44558	8.76535e-06	0.000105427	984	850	849	714	900	746	348	550	569	24h>0h
Ntrk1	367.754	0.853022	0.191972	4.44346	8.85242e-06	0.000106417	545	455	484	371	482	437	185	306	296	24h>0h
Pcnt	1747.12	0.619349	0.139406	4.44278	8.88052e-06	0.000106698	2307	2213	2097	2491	3075	2369	1120	1525	1461	24h>0h
Gatsl3	405.351	-0.978888	0.220339	-4.44265	8.88567e-06	0.000106704	291	292	270	187	240	168	392	509	709	0h>24h
Proser1	376.697	-0.879926	0.198121	-4.44135	8.93956e-06	0.000107294	268	312	247	334	457	372	395	577	484	0h>24h
Vapa	3374.74	-0.736135	0.165799	-4.43991	8.99946e-06	0.000107955	2520	2684	2713	2587	3381	2937	4215	4174	3993	0h>24h
Ckmt1	34.9789	1.81244	0.408231	4.43974	9.00673e-06	0.000107985	48	51	72	42	56	34	14	18	14	24h>0h
Dtx3	188.915	-1.0624	0.239383	-4.43809	9.07613e-06	0.000108702	125	141	116	138	142	88	176	283	309	0h>24h
Gm14226	11.3726	5.94571	1.3397	4.4381	9.07554e-06	0.000108702	15	27	28	51	69	83	0	0	1	24h>0h
Kdm2b	4884.42	-0.646085	0.145612	-4.43703	9.12066e-06	0.000109177	4252	3788	3882	3327	4196	3334	5216	5716	6724	0h>24h
Rpl4	44698.9	-0.653823	0.147419	-4.43514	9.20125e-06	0.000110084	35235	33154	40579	39692	46461	42477	42347	57346	63588	0h>24h
Zeb2	72.167	2.48614	0.560603	4.43477	9.21726e-06	0.000110217	90	118	176	198	154	179	39	14	8	24h>0h
6030408B16Rik	13.8259	3.4632	0.781467	4.43166	9.35094e-06	0.000111756	28	22	30	17	17	14	0	4	3	24h>0h
Nlgn3	34.8192	1.92008	0.433277	4.43154	9.35612e-06	0.000111759	54	71	46	26	39	38	14	17	12	24h>0h
Eln	118.801	1.21859	0.275148	4.42886	9.47346e-06	0.000113101	210	147	165	104	107	67	46	82	87	24h>0h
Lclat1	455.581	-0.83134	0.187771	-4.42741	9.53706e-06	0.0001138	313	325	389	424	418	386	577	564	573	0h>24h
Cnbp	11910.7	-0.560217	0.126538	-4.42725	9.54415e-06	0.000113825	10438	9026	10730	8434	10490	8688	12663	14350	15006	0h>24h
Scamp2	665.908	0.647494	0.146264	4.42689	9.56002e-06	0.000113954	865	823	857	822	923	868	410	585	554	24h>0h
Fkbp6	6204.73	0.632605	0.14294	4.42566	9.6148e-06	0.000114546	8054	7274	8318	7169	9382	7334	3650	5453	5469	24h>0h
Abcc8	780.27	0.677043	0.153008	4.42487	9.64997e-06	0.000114905	1072	992	938	831	964	860	503	623	659	24h>0h
Plec	5504.12	-0.687146	0.155305	-4.42451	9.66633e-06	0.000115039	5061	4078	4066	3695	4924	3361	5395	7412	7458	0h>24h
Wdr81	2435.59	0.89187	0.201581	4.42437	9.6722e-06	0.000115048	3751	3001	3166	3484	4276	3153	1177	1754	2195	24h>0h
Igsf8	1815.39	-0.982729	0.222132	-4.42407	9.68564e-06	0.000115148	1380	1159	1285	1231	1558	1122	1533	2506	3236	0h>24h
Wbp2nl	165.797	0.972344	0.219888	4.422	9.7792e-06	0.000116199	263	204	222	203	269	238	84	132	119	24h>0h
Gle1	3074.37	0.58331	0.132051	4.41732	9.99324e-06	0.000118631	3947	3617	3989	3688	4664	3846	1934	2660	2754	24h>0h
Pdia5	964.391	-0.64426	0.145849	-4.41729	9.99443e-06	0.000118631	742	741	876	796	959	824	968	1231	1302	0h>24h
Mgat4a	1178.74	-1.03865	0.235275	-4.41462	1.01188e-05	0.000120044	786	828	798	646	848	683	1642	1875	1135	0h>24h
Psmb9	234.618	-1.02738	0.232763	-4.41385	1.01548e-05	0.000120408	169	129	188	67	137	66	219	337	390	0h>24h
Glrx	197.327	-1.07861	0.244405	-4.41321	1.0185e-05	0.000120703	122	137	137	114	155	156	291	248	242	0h>24h
Zap70	102.629	-1.07815	0.244384	-4.4117	1.02564e-05	0.000121485	67	73	66	58	53	51	125	137	150	0h>24h
Rgs9	38.9507	-1.96512	0.445471	-4.41133	1.0274e-05	0.00012163	14	12	24	35	12	22	61	79	43	0h>24h
Cd79b	15.4887	-2.81993	0.639347	-4.41064	1.03067e-05	0.00012189	5	4	3	2	3	0	26	30	24	0h>24h
Nrgn	205.313	-1.42578	0.323253	-4.41071	1.03031e-05	0.00012189	123	123	102	101	120	83	151	333	428	0h>24h
Josd2	329.003	1.01017	0.229052	4.41023	1.0326e-05	0.000122054	488	411	481	334	450	326	136	245	278	24h>0h
Rpl35a	10450.4	-0.940136	0.213376	-4.406	1.05295e-05	0.000124394	7969	5307	9313	9453	12479	8790	10165	15155	15855	0h>24h
Exoc4	2320.22	0.641119	0.145589	4.40363	1.06456e-05	0.000125701	2904	2846	3103	3072	3638	3481	1684	2003	1671	24h>0h
Tm9sf2	3126.94	-0.621465	0.141199	-4.40134	1.07586e-05	0.000126902	2476	2548	2685	2482	2983	2708	3564	3940	3679	0h>24h
Kcna5	15.2502	-3.26512	0.741846	-4.40134	1.07586e-05	0.000126902	4	3	2	2	1	1	18	21	44	0h>24h
Prmt2	518.189	-0.865306	0.196621	-4.40089	1.0781e-05	0.0001271	411	321	422	437	473	345	503	666	832	0h>24h
Arhgap33os	31.249	-1.83162	0.416301	-4.39976	1.08368e-05	0.000127692	16	13	14	10	7	8	38	62	46	0h>24h
Herc3	1203.65	0.640868	0.145664	4.39963	1.08437e-05	0.000127706	1570	1478	1543	1674	1996	1640	816	1095	883	24h>0h
Fxyd6	339.986	-1.04695	0.237999	-4.39895	1.08778e-05	0.000128041	234	185	279	252	324	222	319	458	599	0h>24h
1700025G04Rik	650.975	-0.730616	0.166186	-4.39637	1.10075e-05	0.0001295	486	458	593	401	448	350	630	933	866	0h>24h
Fmod	18.0395	2.81571	0.640543	4.39581	1.1036e-05	0.000129768	35	26	38	208	276	234	7	4	2	24h>0h
Hoxd9	12.3618	4.14241	0.942432	4.39545	1.10545e-05	0.000129917	27	17	30	38	24	57	0	1	3	24h>0h
Tmem176a	222.963	0.940913	0.214148	4.39375	1.11409e-05	0.000130865	280	321	315	289	313	348	135	137	180	24h>0h
Cd79a	113.271	-1.8653	0.424566	-4.39342	1.11583e-05	0.000130952	59	35	60	30	49	44	67	232	249	0h>24h
Vgll4	1046.44	-0.618693	0.140827	-4.39328	1.11652e-05	0.000130952	875	804	908	644	904	663	1007	1349	1425	0h>24h
Clec16a	1172.13	0.726489	0.165364	4.39327	1.11657e-05	0.000130952	1678	1479	1413	1353	1694	1565	782	839	993	24h>0h
Cd164	6198.25	-0.901242	0.205202	-4.39197	1.1233e-05	0.000131673	4479	4583	4451	3932	4626	4507	8357	9002	6311	0h>24h
Zmiz1	3729.87	-0.934863	0.212908	-4.39092	1.12871e-05	0.000132239	3131	2828	2028	1955	2744	1983	3768	5728	5159	0h>24h
Zp3	89.9867	-1.28421	0.292484	-4.3907	1.12987e-05	0.000132306	59	56	49	28	33	21	82	150	153	0h>24h
Ccdc28a	328.596	0.829153	0.188938	4.3885	1.14136e-05	0.000133582	405	442	468	444	561	431	228	255	215	24h>0h
Ubqln1	3861.36	-0.556402	0.12684	-4.38666	1.15106e-05	0.000134648	3183	3144	3462	2890	3741	3241	3955	4652	5033	0h>24h
Magel2	60.8235	1.30821	0.298258	4.38617	1.15365e-05	0.000134881	95	90	86	106	123	143	29	35	40	24h>0h
Cda	124.323	-1.34354	0.30643	-4.38449	1.16256e-05	0.000135852	70	64	87	121	128	106	105	188	247	0h>24h
Arl4d	308.324	-0.91497	0.208773	-4.38261	1.17268e-05	0.000136964	257	177	238	118	225	98	302	491	415	0h>24h
Evpl	359.461	0.844552	0.19274	4.38181	1.17697e-05	0.000137395	532	414	504	351	415	310	189	274	307	24h>0h
Slc16a6	337.072	-0.731248	0.166926	-4.38067	1.18313e-05	0.000138043	284	235	276	194	198	159	343	475	436	0h>24h
Ldhb	159.617	-1.09295	0.24955	-4.37968	1.18852e-05	0.000138599	90	92	138	149	142	156	209	206	225	0h>24h
Ppp1r12b	647.501	0.72629	0.165929	4.37712	1.20257e-05	0.000140166	907	807	812	861	1043	919	425	575	449	24h>0h
4930412C18Rik	44.8712	-1.93313	0.441658	-4.37698	1.20333e-05	0.000140182	27	22	9	34	38	30	54	90	69	0h>24h
Sparcl1	50.8349	1.92872	0.440817	4.37533	1.21249e-05	0.000141103	69	69	116	40	46	28	13	36	15	24h>0h
Wdr86	166.184	-1.06996	0.244541	-4.37538	1.21224e-05	0.000141103	116	108	112	78	111	72	156	227	293	0h>24h
Cdon	797.49	-0.872208	0.199432	-4.37346	1.22294e-05	0.000142247	670	580	511	753	883	874	958	1203	889	0h>24h
Ctif	357.994	-0.776458	0.177544	-4.37332	1.22369e-05	0.00014226	308	241	279	311	387	315	357	479	513	0h>24h
Igsf5	12.0595	-4.14547	0.948014	-4.3728	1.22665e-05	0.000142532	2	2	0	1	1	1	27	21	18	0h>24h
Ctso	84.9393	1.32015	0.301947	4.37212	1.23047e-05	0.000142901	111	116	153	136	170	190	54	44	44	24h>0h
Msrb3	92.4878	1.29051	0.295241	4.37104	1.23656e-05	0.000143535	132	144	134	185	185	154	50	70	39	24h>0h
Ankrd27	1212.13	-0.574992	0.131587	-4.36968	1.24431e-05	0.000144361	1053	987	1007	988	1274	1027	1279	1522	1498	0h>24h
Rnf180	335.927	0.820445	0.187782	4.36913	1.24745e-05	0.00014465	501	401	442	515	740	640	226	227	264	24h>0h
Hoxb4	38.3308	2.06668	0.473132	4.36809	1.2534e-05	0.000145266	64	66	64	61	57	47	5	15	25	24h>0h
Ryr1	990.039	-0.807091	0.184797	-4.36745	1.25705e-05	0.000145614	918	669	669	467	568	454	1014	1341	1401	0h>24h
Qpctl	116.702	1.24118	0.284222	4.36693	1.26006e-05	0.000145888	167	149	200	151	181	171	40	88	82	24h>0h
Gfi1b	13.3206	-3.69914	0.84764	-4.36405	1.27679e-05	0.000147739	1	2	3	3	9	5	11	36	29	0h>24h
Gm3571	463.163	-1.27827	0.292915	-4.36395	1.27735e-05	0.000147739	301	234	315	319	392	273	406	563	1009	0h>24h
Cdk10	907.118	0.592155	0.135707	4.36347	1.28014e-05	0.000147986	1182	1048	1189	830	1049	890	591	781	783	24h>0h
Sardh	88.1714	-1.11834	0.256317	-4.36312	1.2822e-05	0.000148148	59	59	56	66	60	45	98	143	119	0h>24h
Gm8206	50.7507	-1.9006	0.43572	-4.36196	1.289e-05	0.000148857	30	19	18	33	15	15	99	79	53	0h>24h
3110082J24Rik	20.608	-2.442	0.559941	-4.36118	1.29361e-05	0.000149313	3	9	8	14	4	7	27	40	37	0h>24h
P2ry2	39.3264	1.82577	0.418884	4.35864	1.30872e-05	0.000150981	45	71	76	49	55	39	11	21	20	24h>0h
Iigp1	12.0878	5.144	1.18109	4.35531	1.32881e-05	0.00015322	25	21	28	44	46	37	0	2	0	24h>0h
Hoxd8	51.4239	1.4776	0.339325	4.35454	1.33344e-05	0.000153675	74	73	90	77	108	83	27	22	31	24h>0h
Arid5b	47.8391	1.56398	0.359491	4.35053	1.35811e-05	0.000156438	80	81	62	119	97	102	20	31	21	24h>0h
Iffo2	1243.61	-1.02584	0.235842	-4.34972	1.36314e-05	0.000156938	959	728	885	478	591	417	985	1988	2085	0h>24h
Camk1d	767.205	-0.97897	0.22509	-4.34925	1.36605e-05	0.000157193	552	523	541	643	714	599	1046	1186	756	0h>24h
Pank1	290.45	-0.788638	0.181352	-4.34865	1.36975e-05	0.000157539	225	188	256	127	131	113	317	409	367	0h>24h
Alad	4390.34	0.758061	0.174351	4.3479	1.37446e-05	0.000157999	5927	5163	6220	5118	6551	5847	2511	3130	4100	24h>0h
Klhl42	112.378	-1.04146	0.239562	-4.34737	1.37777e-05	0.0001583	85	71	74	102	111	103	141	166	140	0h>24h
Gm16702	40.9264	-1.73688	0.39963	-4.34621	1.38507e-05	0.000159058	20	22	17	18	17	14	47	55	86	0h>24h
Anks6	218.868	1.02698	0.236304	4.34599	1.3865e-05	0.000159141	318	297	305	290	407	289	89	168	178	24h>0h
Umodl1	38.3746	-2.24756	0.517216	-4.3455	1.38956e-05	0.000159412	27	7	8	6	4	2	56	68	64	0h>24h
Gm26809	307.239	1.03319	0.237863	4.34364	1.40144e-05	0.000160692	382	417	494	484	442	521	197	245	153	24h>0h
Snap25	14.2628	-4.08074	0.939519	-4.34344	1.40272e-05	0.000160758	3	0	2	0	0	1	40	18	18	0h>24h
Nfix	1387.3	0.842739	0.194031	4.34332	1.40346e-05	0.000160761	2078	1857	1632	1402	1812	1230	693	1169	1125	24h>0h
Ccnd3	2793.45	-0.732522	0.168717	-4.34173	1.41364e-05	0.000161845	2227	2093	2254	1519	1786	1459	2482	3778	4211	0h>24h
Vil1	128.998	-1.27579	0.294121	-4.33763	1.44026e-05	0.000164809	99	50	89	35	34	26	129	215	205	0h>24h
Copz2	146.289	1.03356	0.238283	4.33752	1.44101e-05	0.000164811	220	171	226	210	180	161	92	84	107	24h>0h
Trib2	258.43	-1.01048	0.233021	-4.33645	1.44801e-05	0.000165529	198	161	178	114	137	148	343	280	390	0h>24h
Reln	1756.47	0.642643	0.148273	4.33419	1.46299e-05	0.000167156	2495	2131	2074	3626	4373	3789	1217	1454	1393	24h>0h
B930095G15Rik	22.2765	-2.86192	0.66117	-4.32858	1.50076e-05	0.000171385	11	1	5	1	11	7	43	30	41	0h>24h
Brat1	1728.18	0.700576	0.161855	4.32843	1.50179e-05	0.000171416	2395	2137	2166	2035	2686	2028	980	1408	1554	24h>0h
Prkch	218.259	-0.838919	0.193833	-4.32806	1.50432e-05	0.000171618	165	148	178	124	163	155	226	282	326	0h>24h
Sik1	3671.84	-0.69348	0.16029	-4.32641	1.51561e-05	0.000172819	3027	2757	3006	1663	2506	1723	3298	4911	5399	0h>24h
Ncbp1	3562.31	-0.593848	0.137359	-4.32332	1.53698e-05	0.000175168	3075	2725	3099	2959	3748	3230	3925	4166	4567	0h>24h
Cyb5a	201.08	-0.890092	0.205899	-4.32296	1.53951e-05	0.000175368	138	162	140	139	149	160	215	301	262	0h>24h
Snai1	681.997	-0.890044	0.205913	-4.32244	1.54316e-05	0.000175695	477	535	481	381	540	416	596	998	1074	0h>24h
Krt26	11.7607	-4.12031	0.953319	-4.32207	1.54573e-05	0.000175899	3	1	0	3	4	5	20	29	17	0h>24h
Ears2	710.811	-0.622315	0.144109	-4.31837	1.57188e-05	0.000178784	601	528	627	676	867	712	693	948	929	0h>24h
Gm2606	7482.79	-0.747465	0.173146	-4.31696	1.58194e-05	0.000179838	5433	5332	6764	3825	4662	4737	7429	9064	11465	0h>24h
Pdlim1	308.222	-0.954297	0.221076	-4.31661	1.58443e-05	0.000180031	179	226	252	214	254	205	295	436	488	0h>24h
Ier2	896.692	-0.803137	0.186294	-4.31112	1.62431e-05	0.000184469	640	616	795	445	633	500	818	1236	1367	0h>24h
Hdac9	69.0523	1.23903	0.28745	4.31041	1.62955e-05	0.000184972	117	90	97	75	91	67	36	46	40	24h>0h
Rasl11b	185.85	0.8984	0.208475	4.30939	1.63703e-05	0.000185727	287	207	266	206	232	161	109	140	137	24h>0h
Fnbp1	1623.34	-0.616999	0.143225	-4.30789	1.64821e-05	0.000186902	1453	1297	1259	1040	1337	1028	1590	2173	2096	0h>24h
Cryz	406.783	-1.0124	0.235099	-4.30626	1.66039e-05	0.000188189	236	291	317	271	324	240	358	588	693	0h>24h
Mirg	57.2415	-1.39741	0.324575	-4.30535	1.66719e-05	0.000188865	32	27	40	40	33	34	71	103	73	0h>24h
Ube2l6	80.6105	1.27912	0.297151	4.30463	1.67266e-05	0.00018939	99	123	135	123	102	126	43	40	56	24h>0h
Parl	853.813	-0.742912	0.172668	-4.30255	1.68844e-05	0.000191081	664	614	725	508	606	550	794	1109	1297	0h>24h
Sccpdh	844.619	-0.655754	0.152436	-4.30182	1.69399e-05	0.000191612	678	619	760	788	911	784	962	1090	1000	0h>24h
[truncated: 29,873 more rows]

## Sheet: DEG 0h-48h
Differentially expressed genes between 0 hours and 48 hours
gene_name	baseMean	log2FoldChange	lfcSE	stat	pvalue	padj	diff24h_1.hisat2.count	diff24h_2.hisat2.count	diff24h_3.hisat2.count	diff48h_1.hisat2.count	diff48h_2.hisat2.count	diff48h_3.hisat2.count	SSC0h1.hisat2.count	SSC0h2.hisat2.count	SSC0h3.hisat2.count	significant
Etv5	5110.03	-6.06649	0.157303	-38.5657	0	0	247	190	236	143	191	149	8068	10110	11369	0h>48h
Dusp6	3083.22	-5.86373	0.155337	-37.7485	0	0	138	105	110	105	127	102	5269	5960	6466	0h>48h
Stra8	4704.28	7.57138	0.203348	37.2336	1.95134e-303	1.47528e-299	17634	16791	19953	8856	11085	10078	50	39	54	48h>0h
Hs3st3b1	2056.01	-5.68671	0.163671	-34.7448	1.6591e-264	9.40751e-261	174	119	138	73	91	87	3243	4396	4202	0h>48h
Kit	3262.04	5.29393	0.159588	33.1726	2.67423e-241	1.21309e-237	12054	10892	10810	6128	7705	6590	159	160	152	48h>0h
Pfkp	4129.12	-4.14993	0.127503	-32.5476	2.26604e-232	8.56602e-229	968	924	1112	412	536	466	6528	8489	7879	0h>48h
Mpzl2	2127.04	-6.3237	0.209754	-30.1482	1.13132e-199	3.66565e-196	83	108	96	61	48	58	3955	4326	3920	0h>48h
Zic1	1561.47	-5.98372	0.199771	-29.9529	4.03238e-197	1.14323e-193	106	100	111	41	60	55	2314	3412	3335	0h>48h
Sall3	1604.87	-5.59725	0.187175	-29.9039	1.75035e-196	4.41107e-193	49	56	40	69	88	52	2641	3277	3286	0h>48h
Rapgef3	1195.56	-5.01937	0.168445	-29.7983	4.10855e-195	9.31859e-192	186	199	211	75	81	73	1855	2566	2391	0h>48h
Spry4	1118.73	-6.12463	0.210806	-29.0534	1.3939e-185	2.87409e-182	21	36	32	40	32	29	1844	2346	2268	0h>48h
Lhx1	1418.64	-5.8087	0.200306	-28.9992	6.74321e-185	1.27452e-181	75	62	62	53	68	39	2278	3112	2787	0h>48h
Tcl1	841.289	-5.89546	0.216469	-27.2346	2.52626e-163	4.40754e-160	33	40	41	24	30	35	1407	1729	1703	0h>48h
Acta2	1635.02	6.40106	0.242642	26.3807	2.28369e-153	3.69974e-150	1667	1831	2339	3298	3309	3689	30	30	52	48h>0h
Crmp1	1095.81	-5.5544	0.212106	-26.1868	3.75215e-151	5.6735e-148	118	86	92	50	49	47	1659	2090	2559	0h>48h
Ret	6523.61	-4.2199	0.163266	-25.8469	2.63881e-147	3.74067e-144	974	863	966	587	828	722	9713	12217	14444	0h>48h
Optn	994.647	-3.57335	0.142014	-25.162	1.04457e-139	1.39365e-136	204	190	245	155	180	159	1536	1968	1869	0h>48h
Epha2	4027.53	-4.56909	0.182052	-25.0977	5.27062e-139	6.64128e-136	719	570	704	352	390	302	5570	7900	9349	0h>48h
Bhlhe40	1790.56	-3.68226	0.148386	-24.8153	6.1244e-136	7.31092e-133	600	716	800	244	307	279	2899	3184	3610	0h>48h
Gfra1	2386.41	-3.66701	0.148597	-24.6776	1.86151e-134	2.11104e-131	791	647	731	325	457	340	3742	4402	4795	0h>48h
Igfbp7	1097.32	4.46184	0.181259	24.6158	8.56291e-134	9.24835e-131	1313	1609	1711	2164	2434	2126	70	92	118	48h>0h
Col3a1	4937.82	3.81837	0.158036	24.1614	5.67172e-129	5.84729e-126	6415	6716	7984	9825	10254	9391	599	584	718	48h>0h
Slc38a1	2043.41	-3.10138	0.132529	-23.4015	4.12622e-121	4.069e-118	572	495	525	397	534	440	3176	3789	3725	0h>48h
Col5a2	2045.76	3.84612	0.165915	23.1812	7.04257e-119	6.65552e-116	2176	2201	2655	4066	4382	3795	192	276	316	48h>0h
Tmc8	832.679	-6.94099	0.30131	-23.036	2.03098e-117	1.84259e-114	59	35	38	11	13	19	1159	1798	1929	0h>48h
Pygl	2027.01	-3.33179	0.148105	-22.4962	4.52104e-112	3.94391e-109	487	461	558	367	430	377	2763	3996	4110	0h>48h
Pcdh1	1649.89	-5.27816	0.236078	-22.3577	1.01665e-110	8.54021e-108	179	148	116	88	101	77	2008	3598	3966	0h>48h
Egr2	764.622	-3.98841	0.178847	-22.3006	3.64361e-110	2.95145e-107	125	139	104	93	112	86	1087	1549	1602	0h>48h
Foxc2	1135.49	-5.98896	0.268904	-22.2717	6.94976e-110	5.43543e-107	86	64	70	33	43	37	1436	2244	2958	0h>48h
Etv4	2414.91	-4.71587	0.212416	-22.2011	3.3511e-109	2.53354e-106	340	312	318	164	238	169	3080	5093	5631	0h>48h
Sez6	2146.89	-4.07803	0.18757	-21.7413	8.34415e-105	6.10496e-102	2497	2378	2107	240	306	226	2800	4473	4729	0h>48h
Ltbp2	1470.5	3.37205	0.156216	21.5858	2.44161e-103	1.73056e-100	1723	1675	1526	2685	3040	2856	242	281	231	48h>0h
Dusp4	1776.54	-4.70635	0.218766	-21.5131	1.17369e-102	8.06681e-100	213	165	241	153	118	145	2553	3384	4143	0h>48h
Il17rd	4773.47	-2.52841	0.117758	-21.4712	2.89159e-102	1.92895e-99	1556	1230	1395	1411	1722	1395	6648	8903	8312	0h>48h
Tagln	920.714	4.17697	0.196698	21.2355	4.48933e-100	2.90922e-97	951	1019	1430	1937	1815	1806	95	86	99	48h>0h
Col15a1	482.762	3.94184	0.185703	21.2266	5.42482e-100	3.41779e-97	772	869	995	917	1068	920	55	57	60	48h>0h
Esrp1	2139.37	-3.18128	0.149934	-21.2178	6.53915e-100	4.0085e-97	595	513	551	467	466	424	3567	3845	3790	0h>48h
Scd1	1172.81	-2.81496	0.132693	-21.2141	7.07361e-100	4.22202e-97	371	428	444	287	339	309	1791	2096	2108	0h>48h
Tmc6	1621.58	-4.79097	0.226675	-21.1359	3.72175e-99	2.16443e-96	300	311	306	113	158	94	2120	3375	3780	0h>48h
Tubg2	596.916	-5.04829	0.240018	-21.033	3.27269e-98	1.8557e-95	78	62	84	41	38	33	801	1305	1325	0h>48h
Nxph4	1098.03	-6.39886	0.305712	-20.931	2.79558e-97	1.5465e-94	68	86	98	36	26	20	1357	2290	2807	0h>48h
Igdcc3	635.435	-3.85134	0.185604	-20.7504	1.21697e-95	6.57194e-93	151	169	151	71	107	87	916	1293	1289	0h>48h
Id2	553.074	6.10061	0.294219	20.7349	1.67787e-95	8.85018e-93	311	318	387	1073	1284	1137	21	17	8	48h>0h
Krt19	509.224	-6.09427	0.294937	-20.663	7.46365e-95	3.84734e-92	29	34	61	15	15	17	711	1034	1221	0h>48h
Flt1	1092.38	-3.56264	0.172444	-20.6597	7.99057e-95	4.02742e-92	189	219	227	200	182	162	1756	2217	1910	0h>48h
Gstm2	499.526	6.55313	0.319546	20.5077	1.83961e-93	9.07046e-91	205	210	358	1035	1072	1050	4	12	15	48h>0h
Sept6	1375.82	-2.96648	0.144868	-20.4771	3.44753e-93	1.66369e-90	532	498	560	309	343	346	1923	2698	2549	0h>48h
Adm	441.361	-4.39821	0.215963	-20.3655	3.38082e-92	1.59751e-89	84	85	137	42	45	41	625	908	952	0h>48h
Slc38a4	1512.1	-2.7199	0.133918	-20.3103	1.04337e-91	4.82955e-89	617	630	691	391	493	396	2341	2691	2622	0h>48h
Erg	1144.18	2.6589	0.131608	20.2032	9.17804e-91	4.16334e-88	2237	1966	2157	2041	2297	1989	271	327	316	48h>0h
Tmem132e	2483.13	-4.51896	0.224359	-20.1416	3.18632e-90	1.41704e-87	385	337	392	186	273	210	3093	4917	6114	0h>48h
Ier3	882.817	-3.65362	0.182853	-19.9813	8.01771e-89	3.49711e-86	217	242	335	124	155	138	1175	1775	1882	0h>48h
Prss35	577.621	6.71104	0.335988	19.9741	9.25731e-89	3.9616e-86	551	706	1139	1289	1132	1217	9	17	6	48h>0h
Col1a2	9868.03	3.57972	0.181571	19.7152	1.59549e-86	6.70135e-84	12753	14045	14596	19279	20652	18324	1500	1275	1629	48h>0h
Exoc3l	415.311	-4.68488	0.240204	-19.5038	1.01997e-84	4.20616e-82	71	55	78	26	41	33	590	831	937	0h>48h
Sertad4	1795	2.4765	0.126993	19.5011	1.074e-84	4.3499e-82	3511	3051	3369	2894	3714	3166	471	566	561	48h>0h
Rimbp2	533.805	-3.82194	0.196319	-19.468	2.05079e-84	8.16036e-82	213	158	153	67	70	88	806	1064	1055	0h>48h
Lonrf3	2757.92	2.33993	0.121776	19.215	2.77049e-82	1.08341e-79	3851	3439	3957	4427	5489	4860	794	966	897	48h>0h
Olfm1	751.639	-3.79456	0.197795	-19.1843	5.00423e-82	1.92375e-79	313	273	273	108	121	95	1114	1301	1699	0h>48h
Mapk11	344.885	-3.98847	0.208035	-19.1721	6.33223e-82	2.39369e-79	95	65	83	42	47	42	504	726	679	0h>48h
Nefm	2038.68	-4.71796	0.246275	-19.1573	8.41445e-82	3.12866e-79	118	116	134	158	182	139	2323	5205	4207	0h>48h
Cdh4	404.639	-3.77837	0.198027	-19.0801	3.6977e-81	1.3527e-78	141	112	119	62	63	51	618	753	839	0h>48h
Slc2a3	5365.38	-2.89657	0.152111	-19.0424	7.59228e-81	2.73334e-78	1246	1268	1354	1205	1522	1350	7087	9758	11027	0h>48h
Sparc	4565.33	3.2115	0.169549	18.9414	5.20013e-80	1.84288e-77	5074	5629	7030	8800	8794	8695	802	780	1007	48h>0h
Ace	1326.98	-3.58162	0.189215	-18.9288	6.60302e-80	2.30405e-77	489	442	478	204	251	202	1692	2628	2930	0h>48h
8430419L09Rik	1856.06	-2.98414	0.158706	-18.803	7.13917e-79	2.45339e-76	805	776	740	422	534	384	2504	3522	3679	0h>48h
Aldh1a1	337.73	5.3955	0.287096	18.7934	8.55807e-79	2.8971e-76	280	408	577	746	694	663	11	19	16	48h>0h
Igsf21	551.662	-4.69858	0.250595	-18.7497	1.94742e-78	6.4955e-76	191	118	173	31	57	44	767	1058	1311	0h>48h
Col12a1	2193.91	3.74257	0.199802	18.7314	2.74538e-78	9.02435e-76	2403	2577	2147	4035	4669	4365	329	291	258	48h>0h
Pcdh12	352.979	-5.08882	0.272675	-18.6626	9.97488e-78	3.232e-75	16	8	17	15	30	20	497	765	764	0h>48h
Ephb1	803.101	-3.48733	0.18713	-18.6359	1.64517e-77	5.25551e-75	297	277	304	111	156	155	1168	1476	1686	0h>48h
Plvap	582.011	-6.07371	0.330986	-18.3504	3.27972e-75	1.03316e-72	41	33	22	15	26	14	695	1200	1521	0h>48h
Ldlr	2446.01	-3.12253	0.170714	-18.291	9.75695e-75	3.03147e-72	445	416	459	467	628	525	3192	4549	5209	0h>48h
Bcl6b	3553.51	-3.44751	0.189535	-18.1893	6.27893e-74	1.92449e-71	618	494	534	535	793	597	4495	7167	7613	0h>48h
Hdac7	2535.01	-3.54176	0.194934	-18.169	9.07761e-74	2.74519e-71	866	828	667	364	541	389	3223	5086	5514	0h>48h
Ccnd2	8855.05	-2.01896	0.111183	-18.159	1.09045e-73	3.25428e-71	8203	7108	7912	3550	4096	3584	11863	15636	14107	0h>48h
Scn5a	1354.43	2.80915	0.154857	18.1402	1.5334e-73	4.51676e-71	2276	1951	1863	2323	3043	2266	266	390	338	48h>0h
Adgrl2	2812.25	-2.54744	0.141166	-18.0457	8.52464e-73	2.47881e-70	1005	946	999	852	893	879	4264	5261	4486	0h>48h
Fblim1	871.156	-2.63926	0.146676	-17.9938	2.17735e-72	6.25119e-70	621	506	619	219	295	260	1243	1564	1591	0h>48h
Rasgrp2	1144.68	-3.18277	0.177107	-17.9708	3.29725e-72	9.34811e-70	366	367	380	208	291	232	1496	2222	2371	0h>48h
Barhl2	484.1	-4.18223	0.236385	-17.6924	4.79587e-70	1.3429e-67	86	62	71	59	60	43	638	977	1100	0h>48h
Col1a1	15036	3.16325	0.179357	17.6366	1.28981e-69	3.56757e-67	22166	23060	20763	28484	32557	25728	2595	2580	3637	48h>0h
Rbm24	325.341	-3.47871	0.200131	-17.3822	1.12615e-67	3.07737e-65	89	94	95	61	55	55	500	607	640	0h>48h
Elfn1	345.676	-3.97978	0.229405	-17.3483	2.03325e-67	5.49001e-65	47	57	85	39	46	47	467	773	682	0h>48h
Gprc5a	243.287	-4.4341	0.257747	-17.2033	2.50681e-66	6.68904e-64	27	37	47	18	25	26	356	502	511	0h>48h
Kcnc2	354.687	-6.0361	0.350919	-17.2008	2.6182e-66	6.90506e-64	17	22	9	16	11	7	721	715	579	0h>48h
Rasl11a	411.04	-3.38654	0.196997	-17.1909	3.10866e-66	8.1043e-64	92	81	104	68	83	79	558	800	854	0h>48h
Scd2	5303.38	-2.28865	0.133339	-17.1642	4.92044e-66	1.26819e-63	1987	2128	2576	1693	2074	2006	7045	9175	9624	0h>48h
Notch1	2476.28	-2.6746	0.156404	-17.1005	1.47015e-65	3.74656e-63	1132	930	806	675	851	631	3232	4492	4888	0h>48h
Smoc2	926.113	-2.40943	0.141012	-17.0867	1.86501e-65	4.70003e-63	282	291	331	270	356	316	1327	1606	1625	0h>48h
Ndrg4	4569.88	2.1869	0.128768	16.9832	1.09338e-64	2.72515e-62	8836	7787	8257	7297	9430	7375	1305	1767	1762	48h>0h
Zswim5	2196.56	2.0105	0.118584	16.9542	1.79142e-64	4.41643e-62	3332	3229	3165	3406	4220	3668	726	914	918	48h>0h
Clu	600.57	3.20311	0.188943	16.9527	1.83699e-64	4.48008e-62	454	612	919	1124	1111	1217	93	116	136	48h>0h
Cxcr4	446.894	-3.01404	0.177802	-16.9517	1.87054e-64	4.51336e-62	113	106	156	103	110	102	655	777	897	0h>48h
Col4a1	3475.55	2.50736	0.148606	16.8725	7.17075e-64	1.712e-61	5577	5836	7280	6330	7141	5491	837	1031	1181	48h>0h
Slc2a1	4881.15	-2.74183	0.162921	-16.8292	1.49005e-63	3.5204e-61	2501	2452	3105	1234	1515	1324	6323	8427	10272	0h>48h
Adam33	275.434	-3.94334	0.234445	-16.8199	1.74493e-63	4.08007e-61	40	32	36	37	43	28	399	599	525	0h>48h
Gpd1l	879.998	-2.4513	0.146394	-16.7445	6.20752e-63	1.43666e-60	366	344	441	300	305	265	1215	1566	1581	0h>48h
Col4a2	2135.14	2.52169	0.150624	16.7416	6.52474e-63	1.49482e-60	3299	3346	4463	3899	4427	3344	530	619	704	48h>0h
Gprc5c	370.888	-4.59575	0.274796	-16.7242	8.72832e-63	1.97967e-60	64	87	91	39	30	25	494	738	875	0h>48h
Sh2b3	3933.61	-2.60746	0.156307	-16.6817	1.78226e-62	4.00233e-60	1244	1130	1105	1051	1338	1171	4943	7171	7828	0h>48h
Fgf9	312.649	-3.32146	0.201697	-16.4676	6.27291e-61	1.39486e-58	88	63	100	53	63	66	484	637	542	0h>48h
Bhlhe41	1604.46	-2.75598	0.167389	-16.4645	6.5983e-61	1.45297e-58	467	495	456	406	525	400	2027	3018	3208	0h>48h
Nid1	4034.6	-2.3002	0.140058	-16.4231	1.3067e-60	2.84974e-58	1408	1409	1507	1388	1490	1473	5727	7624	6272	0h>48h
Gyltl1b	1403.72	-2.72208	0.166535	-16.3454	4.69216e-60	1.01355e-57	678	728	584	400	427	356	1793	2575	2823	0h>48h
Spred2	1468.2	-2.24574	0.137461	-16.3373	5.35335e-60	1.14547e-57	1260	1111	1040	506	654	485	1992	2590	2527	0h>48h
Chrna4	738.881	-2.69555	0.165599	-16.2776	1.42428e-59	3.01907e-57	348	345	269	177	263	197	1023	1354	1382	0h>48h
Col13a1	1325.81	-4.59852	0.282678	-16.2677	1.67346e-59	3.51442e-57	107	119	121	109	143	87	1386	3195	3049	0h>48h
Ptpn3	1910.15	-1.89521	0.116765	-16.2309	3.04854e-59	6.34348e-57	1122	946	1020	817	941	835	2537	3244	3031	0h>48h
Aldh1a3	297.446	-4.00722	0.247534	-16.1885	6.07579e-59	1.25277e-56	69	64	56	39	46	27	406	613	635	0h>48h
Nid2	8604.59	-2.20661	0.136313	-16.1878	6.14678e-59	1.25599e-56	4798	4357	4335	3031	3889	2938	10989	15214	15399	0h>48h
Inha	214.318	4.81088	0.297372	16.178	7.21032e-59	1.46016e-56	360	373	710	442	498	387	15	17	11	48h>0h
Cyp51	3012.31	-2.08928	0.129312	-16.1569	1.01622e-58	2.03972e-56	1233	1178	1277	1121	1391	1168	4101	4779	5389	0h>48h
2900026A02Rik	2316.22	-2.35775	0.146103	-16.1376	1.38774e-58	2.76099e-56	961	874	847	712	983	741	3017	4267	4118	0h>48h
Plk3	634.707	-2.93109	0.181711	-16.1305	1.55847e-58	3.0737e-56	294	277	245	129	203	143	905	1152	1236	0h>48h
Id1	1489.35	2.89316	0.179878	16.084	3.30283e-58	6.4579e-56	1083	1163	1367	2592	3377	2484	244	395	406	48h>0h
Trf	318.58	-5.14921	0.320708	-16.0557	5.21107e-58	1.01019e-55	17	22	28	15	20	21	373	784	692	0h>48h
Foxa2	268.151	-4.81074	0.300298	-16.0199	9.28059e-58	1.78384e-55	52	36	36	18	19	22	388	469	667	0h>48h
Ppp2r2c	3064.73	-2.38612	0.149311	-15.9808	1.73777e-57	3.31214e-55	2131	1789	2090	948	1184	1027	3784	5609	5788	0h>48h
Cdh3	1409.8	-2.98368	0.187177	-15.9405	3.31905e-57	6.27327e-55	458	419	459	304	401	313	1734	2676	2998	0h>48h
Cyp2u1	355.039	-3.04354	0.191141	-15.923	4.3892e-57	8.22738e-55	109	141	95	72	98	77	486	721	658	0h>48h
Spon1	354.654	-3.69988	0.232488	-15.9143	5.04467e-57	9.37853e-55	100	83	98	46	53	63	516	626	792	0h>48h
Abr	5067.06	-1.83967	0.116089	-15.8471	1.47236e-56	2.71501e-54	2873	2589	2686	2158	2739	2214	6671	8162	8343	0h>48h
Epas1	1005.81	-2.56762	0.162668	-15.7844	3.9858e-56	7.29048e-54	393	299	311	261	367	306	1451	1981	1609	0h>48h
Glis3	3913	-2.83789	0.179802	-15.7834	4.04789e-56	7.34482e-54	1017	912	778	928	1200	959	6476	7813	5664	0h>48h
Acacb	1336.25	-2.53603	0.160714	-15.7797	4.2908e-56	7.72378e-54	806	630	686	396	518	352	1856	2312	2515	0h>48h
Gpr4	199.834	-4.24674	0.269224	-15.774	4.69501e-56	8.38484e-54	23	31	35	16	21	27	321	416	374	0h>48h
Dpysl2	1087.84	-2.19284	0.140547	-15.6021	7.04059e-55	1.2449e-52	640	543	681	384	498	374	1457	1934	1845	0h>48h
Klhl36	325.93	-4.27049	0.273718	-15.6018	7.08048e-55	1.2449e-52	49	42	51	43	27	32	440	659	732	0h>48h
F2rl1	271.496	-3.61935	0.232379	-15.5752	1.07313e-54	1.87228e-52	62	68	57	52	37	41	423	542	504	0h>48h
Slc9a3r1	2270.05	-3.19435	0.205102	-15.5745	1.08559e-54	1.87957e-52	540	487	541	466	552	418	2757	4162	5206	0h>48h
Tdrd6	211.008	-3.94058	0.253056	-15.5719	1.12936e-54	1.94054e-52	44	53	46	26	36	21	362	389	402	0h>48h
Clcf1	352.355	-3.9141	0.25329	-15.453	7.19674e-54	1.22729e-51	49	62	67	57	47	36	480	813	660	0h>48h
Sox2	263.596	-4.55269	0.294762	-15.4453	8.11155e-54	1.37297e-51	26	41	27	23	24	22	328	534	639	0h>48h
Myo7a	320.278	3.6347	0.235694	15.4213	1.17777e-53	1.97874e-51	339	366	415	638	680	580	31	65	45	48h>0h
Cxcl12	256.245	3.71412	0.241266	15.3943	1.78718e-53	2.98051e-51	146	219	190	482	511	527	31	30	45	48h>0h
Lat	435.014	-3.15399	0.205521	-15.3463	3.75067e-53	6.20941e-51	133	132	166	84	116	83	568	823	918	0h>48h
Mmp2	1289.76	2.38669	0.155556	15.343	3.94629e-53	6.48593e-51	1454	1502	1632	2117	2462	2353	323	408	485	48h>0h
Cdk18	499.842	-2.69622	0.177057	-15.228	2.30592e-52	3.76263e-50	268	277	274	139	143	145	653	934	964	0h>48h
Gfpt2	1055.39	-2.12749	0.139787	-15.2195	2.62367e-52	4.25053e-50	644	593	586	372	470	419	1547	1726	1730	0h>48h
Gsta4	1076.03	-2.53915	0.166847	-15.2184	2.66886e-52	4.29308e-50	350	280	410	326	349	335	1386	1854	2166	0h>48h
Sp5	648.083	-3.88445	0.255568	-15.1993	3.57466e-52	5.70963e-50	158	126	133	81	101	82	780	1166	1657	0h>48h
Pdgfb	2874.09	-3.09979	0.204162	-15.183	4.58508e-52	7.27232e-50	1187	1024	1097	607	751	572	3391	5390	6489	0h>48h
Trib1	819.708	-2.31209	0.15252	-15.1593	6.58096e-52	1.03655e-49	277	298	310	266	341	276	1067	1414	1530	0h>48h
Tmem132c	531.678	-2.99304	0.197926	-15.122	1.15969e-51	1.81399e-49	192	154	164	118	155	109	685	996	1108	0h>48h
Prss23	242.43	3.59428	0.237981	15.1033	1.54142e-51	2.39458e-49	332	321	350	461	458	507	35	36	37	48h>0h
Actn2	991.343	-2.85174	0.18925	-15.0686	2.60416e-51	4.01802e-49	321	303	283	220	315	242	1612	1975	1481	0h>48h
Sphk1	861.806	-3.71444	0.247623	-15.0004	7.29672e-51	1.11822e-48	232	236	275	138	117	133	1030	1642	2083	0h>48h
Pdzd2	756.64	-2.63173	0.175583	-14.9885	8.73262e-51	1.32929e-48	161	150	139	217	241	215	1170	1498	1132	0h>48h
Cyp1b1	221.359	4.35356	0.291689	14.9254	2.25439e-50	3.40878e-48	187	195	206	445	426	472	22	24	14	48h>0h
Sall1	1762.22	-2.02523	0.136127	-14.8775	4.61391e-50	6.93033e-48	502	537	461	646	853	734	2404	3139	2736	0h>48h
Bgn	2846.01	2.52316	0.170113	14.8323	9.06147e-50	1.35213e-47	2791	3422	3210	4784	5006	5665	748	782	928	48h>0h
Hip1	3632.52	-1.82687	0.123371	-14.8079	1.30244e-49	1.93076e-47	2435	2155	2112	1500	1939	1691	4589	6170	5871	0h>48h
Tmsb4x	999.614	3.09369	0.209378	14.7757	2.10279e-49	3.09698e-47	1052	1098	1673	1812	1826	2062	200	171	237	48h>0h
Cdh1	451.066	-2.77485	0.187876	-14.7696	2.30217e-49	3.36874e-47	217	239	220	124	120	123	658	743	901	0h>48h
Phlda1	282.433	-3.72015	0.251978	-14.7638	2.5076e-49	3.64583e-47	47	41	30	35	49	44	365	537	651	0h>48h
Rspo2	637.369	-2.52378	0.170995	-14.7594	2.67799e-49	3.86876e-47	289	246	294	194	250	164	927	1162	1087	0h>48h
Lhx8	277.874	4.53271	0.307429	14.7439	3.36568e-49	4.83146e-47	283	231	251	486	649	575	31	15	20	48h>0h
Ccnd1	2145.15	-2.31555	0.157592	-14.6933	7.11128e-49	1.01441e-46	1570	1440	1529	687	884	735	2612	3827	4104	0h>48h
Ankrd37	354.999	-3.01783	0.206126	-14.6407	1.54498e-48	2.1901e-46	151	114	146	67	88	95	487	660	712	0h>48h
Kcna1	260.418	-4.22879	0.289024	-14.6313	1.77379e-48	2.49884e-46	66	61	58	23	37	25	429	628	390	0h>48h
Nkx1-1	205.769	4.69584	0.321052	14.6264	1.90549e-48	2.6678e-46	241	256	281	398	486	389	9	11	25	48h>0h
Mb21d2	1215.37	-2.12118	0.145671	-14.5614	4.94524e-48	6.88116e-46	762	636	772	447	522	486	1594	1955	2247	0h>48h
Pdgfa	2137.91	-2.13203	0.147687	-14.4362	3.06341e-47	4.23666e-45	1214	1172	1261	701	1011	845	2790	3677	3753	0h>48h
Hebp1	187.605	-3.4436	0.239104	-14.4021	5.01937e-47	6.89966e-45	59	54	51	32	33	36	271	393	346	0h>48h
Mn1	959.879	-2.72293	0.189137	-14.3966	5.43324e-47	7.42358e-45	510	482	510	237	343	235	1208	1787	1928	0h>48h
Pdk1	1993.02	-2.37229	0.16523	-14.3575	9.56415e-47	1.29122e-44	1061	988	1150	591	801	682	3213	3458	3017	0h>48h
Ptprb	439.785	-2.28172	0.158921	-14.3576	9.55321e-47	1.29122e-44	125	73	107	153	169	158	641	728	759	0h>48h
Phf19	244.975	-4.18724	0.292349	-14.3228	1.57737e-46	2.11695e-44	60	40	53	30	34	18	315	492	569	0h>48h
Ptpn13	3960.38	-1.91218	0.133555	-14.3176	1.69907e-46	2.26686e-44	1636	1415	1724	1706	2034	1598	5181	7127	6037	0h>48h
Vsx1	154.49	-5.00033	0.349297	-14.3154	1.75364e-46	2.32598e-44	17	13	6	8	10	12	213	346	327	0h>48h
Amot	1965.88	-3.3725	0.235918	-14.2952	2.34394e-46	3.09086e-44	394	389	333	301	445	369	3586	4178	2614	0h>48h
Arhgap26	1800.24	-2.22073	0.1554	-14.2904	2.5116e-46	3.29281e-44	783	673	678	688	772	580	2691	3177	2766	0h>48h
Pramef12	1905.95	1.83329	0.128605	14.2552	4.16038e-46	5.42308e-44	2997	2829	3151	2782	3562	3209	690	875	882	48h>0h
Arhgap31	1134.25	-2.4204	0.169917	-14.2446	4.84291e-46	6.27669e-44	424	395	431	352	441	354	1589	2311	1705	0h>48h
9930012K11Rik	210.497	-4.40313	0.309748	-14.2152	7.37603e-46	9.50544e-44	33	25	21	18	23	20	258	423	513	0h>48h
Draxin	172.884	3.60085	0.253557	14.2013	8.99309e-46	1.15239e-43	265	271	228	326	370	327	22	23	32	48h>0h
Acss1	434.784	-3.01586	0.213262	-14.1416	2.10439e-45	2.68144e-43	182	184	187	102	126	80	555	857	875	0h>48h
Hs3st3a1	213.484	-3.71034	0.264508	-14.0273	1.0608e-44	1.34414e-42	36	32	24	25	34	38	386	355	407	0h>48h
Wisp2	164.968	4.92531	0.351132	14.0269	1.06673e-44	1.34414e-42	104	104	113	366	324	327	5	14	12	48h>0h
Spred3	222.802	-3.51858	0.251661	-13.9814	2.02334e-44	2.53544e-42	32	39	41	47	35	32	310	453	444	0h>48h
Ksr2	243.263	-3.18217	0.22791	-13.9624	2.64443e-44	3.29551e-42	97	95	55	62	50	42	378	458	444	0h>48h
Usp46	841.199	-2.19229	0.157108	-13.9541	2.97114e-44	3.68242e-42	351	316	330	315	312	336	1210	1481	1338	0h>48h
St14	335.06	-3.98721	0.286433	-13.9202	4.77677e-44	5.88815e-42	98	69	77	44	42	41	375	685	819	0h>48h
Ccno	167.23	3.99415	0.286952	13.9192	4.84054e-44	5.9345e-42	180	211	206	282	396	335	14	18	26	48h>0h
Pitpnc1	764.302	-1.92928	0.13863	-13.9167	5.01208e-44	6.07909e-42	478	364	406	326	378	315	1070	1269	1193	0h>48h
Sox13	2164.89	-2.24916	0.161612	-13.917	4.99433e-44	6.07909e-42	883	785	787	748	959	714	2633	3826	4094	0h>48h
Capn12	184.815	-4.39508	0.316638	-13.8805	8.3212e-44	1.0039e-41	93	98	117	17	23	14	227	411	411	0h>48h
Cdcp1	160.116	-3.79303	0.274177	-13.8343	1.58365e-43	1.90047e-41	41	46	39	20	25	24	284	315	268	0h>48h
Jam2	145.431	4.34237	0.314142	13.823	1.85268e-43	2.21161e-41	140	147	259	293	284	306	11	15	14	48h>0h
Foxf1	572.752	-3.20347	0.231859	-13.8165	2.02799e-43	2.40821e-41	214	153	171	99	152	111	695	1063	1304	0h>48h
Ptn	145.244	5.29609	0.383586	13.8068	2.31987e-43	2.74047e-41	46	74	32	310	301	292	8	6	7	48h>0h
Podxl	1618.13	-1.9874	0.144123	-13.7896	2.94411e-43	3.45986e-41	794	592	684	600	841	658	2076	2695	2814	0h>48h
Pear1	1678.58	-2.25425	0.163781	-13.7638	4.20609e-43	4.91744e-41	642	663	530	533	762	580	2075	2981	3125	0h>48h
Ablim1	242.836	-2.96378	0.215541	-13.7504	5.0622e-43	5.88798e-41	41	38	37	59	54	63	333	469	464	0h>48h
Pip4k2a	727.443	-2.1712	0.158044	-13.7379	6.01622e-43	6.96193e-41	159	157	185	269	320	259	1065	1317	1090	0h>48h
Ankrd63	237.671	-3.85636	0.282418	-13.6548	1.8909e-42	2.17703e-40	73	93	71	25	42	32	294	466	559	0h>48h
Nrros	283.281	-3.00629	0.220795	-13.6157	3.22818e-42	3.6979e-40	86	62	98	53	71	77	374	560	552	0h>48h
Prickle1	828.439	-2.04081	0.1499	-13.6144	3.28832e-42	3.74786e-40	286	290	263	328	370	339	1121	1282	1495	0h>48h
Cdc42ep3	354.562	-2.2775	0.168042	-13.5532	7.58775e-42	8.60488e-40	140	161	213	125	146	118	470	629	627	0h>48h
Phldb2	363.491	3.8448	0.284103	13.5331	9.96709e-42	1.1196e-39	424	545	618	730	677	754	56	49	31	48h>0h
Col8a1	167.483	3.69079	0.272723	13.5331	9.97131e-42	1.1196e-39	120	158	128	327	337	328	25	27	18	48h>0h
Lrig3	734.078	-2.01804	0.149604	-13.4892	1.80944e-41	2.02166e-39	291	259	335	303	346	283	977	1161	1309	0h>48h
Rxrg	131.603	-4.70818	0.349249	-13.4808	2.02761e-41	2.25433e-39	7	17	17	12	9	10	182	290	277	0h>48h
Nav1	2976.8	-1.73879	0.129013	-13.4776	2.11774e-41	2.33168e-39	2096	1797	1432	1316	1643	1445	3961	5075	4353	0h>48h
Wfikkn2	157.727	-3.88997	0.28862	-13.4778	2.11212e-41	2.33168e-39	28	31	13	19	24	21	204	329	342	0h>48h
Kdr	259.814	-3.33259	0.248312	-13.4209	4.55854e-41	4.99479e-39	93	88	101	40	73	39	399	460	524	0h>48h
Tet3	3796.68	2.18798	0.163159	13.4101	5.27871e-41	5.75608e-39	5078	4318	3937	6381	8010	5650	1113	1621	1277	48h>0h
Bmp1	445.758	2.25464	0.168311	13.3957	6.40741e-41	6.95342e-39	698	664	740	750	808	797	128	151	173	48h>0h
Letmd1	194.457	3.16165	0.236753	13.3542	1.11925e-40	1.20884e-38	346	310	303	320	448	359	28	42	45	48h>0h
Prkcb	743.625	-2.89902	0.217159	-13.3498	1.18763e-40	1.27661e-38	359	268	342	192	160	206	1202	1485	1131	0h>48h
Bzrap1	290.516	-2.50786	0.188145	-13.3294	1.56217e-40	1.6713e-38	221	148	186	92	108	79	392	546	514	0h>48h
Hunk	548.936	-2.40108	0.180328	-13.3151	1.89185e-40	2.01451e-38	274	237	264	177	212	172	677	963	1083	0h>48h
Csf1	668.129	2.01307	0.151415	13.2951	2.47127e-40	2.6192e-38	687	842	718	1088	1282	1064	246	257	269	48h>0h
Tmem255a	211.58	-5.37629	0.404595	-13.2881	2.71504e-40	2.86418e-38	19	31	52	9	14	9	473	435	274	0h>48h
Mest	422.181	-2.45299	0.184994	-13.2598	3.95718e-40	4.15523e-38	136	156	110	140	148	129	689	702	678	0h>48h
Cmtm8	182.325	-4.38088	0.330552	-13.2532	4.3228e-40	4.51822e-38	51	30	32	19	27	8	258	398	371	0h>48h
Abcc3	427.183	-2.56421	0.193731	-13.2359	5.4432e-40	5.66318e-38	196	149	145	116	152	129	542	739	873	0h>48h
Plaur	231.6	-3.68764	0.279003	-13.2172	6.98172e-40	7.2307e-38	52	64	72	22	50	36	307	478	486	0h>48h
Vstm2l	203.108	-5.52597	0.419783	-13.1639	1.41646e-39	1.46031e-37	15	24	30	7	16	5	256	368	556	0h>48h
Arhgef15	577.657	-2.2434	0.170603	-13.1498	1.70621e-39	1.75107e-37	246	223	242	181	235	230	744	995	1065	0h>48h
Usp43	208.304	-2.79009	0.212185	-13.1493	1.7166e-39	1.7538e-37	132	127	99	52	65	52	284	377	409	0h>48h
Tgfb1	1072.2	-2.8098	0.214095	-13.1241	2.39744e-39	2.4384e-37	406	393	427	290	318	250	1209	2060	2306	0h>48h
Lats2	2349.58	1.76686	0.135252	13.0635	5.3233e-39	5.39008e-37	3406	3053	3227	3556	4362	3735	986	1115	1004	48h>0h
Tgif1	261.906	-2.69442	0.206329	-13.0589	5.65544e-39	5.70093e-37	93	111	99	63	74	87	393	473	459	0h>48h
Serpinf1	715.606	2.1892	0.167755	13.05	6.35862e-39	6.38141e-37	594	673	665	1164	1243	1338	231	247	272	48h>0h
Erbb3	2232.1	-1.89423	0.145229	-13.0431	6.96023e-39	6.9544e-37	1239	1119	1178	910	1255	886	2935	3653	3712	0h>48h
Eno2	272.341	-2.43615	0.1869	-13.0346	7.78138e-39	7.74077e-37	167	188	189	83	97	92	400	507	436	0h>48h
Pqlc1	467.974	-2.35102	0.180531	-13.0228	9.07808e-39	8.99127e-37	199	176	245	144	181	167	604	780	917	0h>48h
Fev	184.292	-5.1296	0.39475	-12.9946	1.3137e-38	1.29548e-36	16	6	11	11	15	7	200	417	455	0h>48h
Loxl1	294.899	2.41963	0.186773	12.9549	2.20409e-38	2.16411e-36	433	426	438	510	551	527	82	87	102	48h>0h
Cerk	723.645	-2.68113	0.207114	-12.9452	2.50166e-38	2.4457e-36	236	264	368	242	194	185	929	1334	1428	0h>48h
Myh11	227.937	2.81669	0.217616	12.9434	2.55935e-38	2.49135e-36	212	204	286	406	438	431	54	63	48	48h>0h
Oasl2	452.194	2.14702	0.165941	12.9385	2.72929e-38	2.64543e-36	1158	1019	1153	709	835	818	132	188	169	48h>0h
Stc2	248.472	-2.5071	0.194071	-12.9185	3.54159e-38	3.41817e-36	179	171	250	74	83	81	334	480	428	0h>48h
Mcam	9027.46	-1.94305	0.150896	-12.8768	6.0837e-38	5.84679e-36	5098	4797	5032	3563	4756	3675	10587	15737	15945	0h>48h
Tgm2	243.174	3.02074	0.234701	12.8706	6.5903e-38	6.30695e-36	540	490	676	448	549	396	38	51	68	48h>0h
Cemip	282.414	4.27161	0.332446	12.849	8.70864e-38	8.29919e-36	75	107	73	559	560	592	34	33	13	48h>0h
2810459M11Rik	163.926	-3.4844	0.272184	-12.8016	1.60525e-37	1.52338e-35	57	53	59	32	29	25	222	302	363	0h>48h
Ccl7	266.99	2.53357	0.19794	12.7997	1.64612e-37	1.55565e-35	192	254	199	460	484	509	67	87	76	48h>0h
Sh3bp4	1518.14	-2.05727	0.160881	-12.7875	1.92645e-37	1.81302e-35	846	771	842	558	733	600	1862	2459	2884	0h>48h
Irs2	569.526	-1.99198	0.155894	-12.7778	2.18198e-37	2.04502e-35	311	292	271	209	279	247	724	1000	950	0h>48h
Fer1l6	170.689	-3.59122	0.281759	-12.7457	3.29234e-37	3.07299e-35	59	40	32	26	34	24	307	350	257	0h>48h
Gjb2	251.305	-2.69374	0.211693	-12.7248	4.30768e-37	4.0042e-35	83	75	90	66	72	77	387	492	391	0h>48h
Lmx1a	208.464	-3.21309	0.252543	-12.723	4.40868e-37	4.08135e-35	57	43	68	45	46	39	253	437	426	0h>48h
Ocln	986.584	-1.72863	0.136576	-12.6569	1.02404e-36	9.44156e-35	423	379	539	468	567	434	1282	1558	1594	0h>48h
Fbln2	2602.86	1.67712	0.132598	12.6482	1.14517e-36	1.05156e-34	3121	3588	3477	4063	4385	4225	1120	1213	1278	48h>0h
Vash2	609.781	-1.9222	0.152426	-12.6107	1.8425e-36	1.68507e-34	511	492	560	243	289	283	856	959	998	0h>48h
Hsd17b12	2482.39	-1.8748	0.148728	-12.6056	1.96754e-36	1.7922e-34	1320	1203	1580	999	1230	1179	3545	3662	4142	0h>48h
Cyp11a1	145.561	4.9207	0.390635	12.5967	2.20283e-36	1.9985e-34	317	449	470	340	263	290	11	11	5	48h>0h
Fbn1	1223.09	2.32618	0.185041	12.5712	3.04235e-36	2.74914e-34	1666	1649	1818	2055	2229	2230	419	388	367	48h>0h
Rgs4	159.877	3.13371	0.249362	12.5669	3.20986e-36	2.889e-34	167	167	149	276	341	303	34	33	28	48h>0h
Med14	2612.3	-2.92577	0.232864	-12.5643	3.31972e-36	2.97607e-34	331	342	331	616	664	661	5042	4771	3443	0h>48h
Fgf3	200.05	-3.48613	0.277738	-12.5519	3.88167e-36	3.46615e-34	68	62	97	35	37	33	243	376	470	0h>48h
Pappa	158.017	4.82462	0.38439	12.5513	3.90794e-36	3.47592e-34	149	171	159	354	275	337	15	8	8	48h>0h
Gata4	177.502	3.76471	0.300183	12.5414	4.43032e-36	3.92516e-34	252	245	324	325	382	351	31	23	16	48h>0h
Lins	228.068	-3.18019	0.253865	-12.5271	5.30736e-36	4.6839e-34	94	89	77	45	63	38	404	435	351	0h>48h
Egln3	958.419	-1.94008	0.154884	-12.526	5.37997e-36	4.72958e-34	659	796	842	371	469	431	1252	1470	1731	0h>48h
Smox	649.436	-2.60913	0.208351	-12.5227	5.60661e-36	4.90979e-34	276	263	285	183	220	184	746	1176	1386	0h>48h
Cyr61	549.535	2.12747	0.170112	12.5063	6.89956e-36	6.01881e-34	820	1072	1061	888	1083	899	186	183	227	48h>0h
Slc7a7	232.335	-2.64152	0.211794	-12.4721	1.05945e-35	9.20668e-34	84	69	66	55	88	64	319	446	412	0h>48h
Asb7	169.302	-3.12704	0.250843	-12.4661	1.14266e-35	9.86584e-34	79	62	63	36	36	39	288	325	269	0h>48h
Tns2	1147.58	-2.0108	0.161302	-12.466	1.144e-35	9.86584e-34	459	365	267	438	535	490	1360	1929	2133	0h>48h
Egr3	310.525	-5.50148	0.441493	-12.4611	1.21707e-35	1.04562e-33	10	15	9	25	5	12	374	785	652	0h>48h
Hbegf	410.139	-2.22358	0.178636	-12.4475	1.44215e-35	1.23432e-33	213	198	209	146	172	146	512	693	784	0h>48h
Col6a6	123.254	-3.90916	0.314143	-12.4439	1.50938e-35	1.287e-33	57	47	55	21	13	15	178	264	238	0h>48h
Dusp7	2690.7	-1.93728	0.155952	-12.4223	1.9782e-35	1.68043e-33	1388	1286	1422	1125	1361	1091	3735	3857	4850	0h>48h
Mfap4	163.225	3.29744	0.265648	12.4128	2.22765e-35	1.88527e-33	152	189	209	285	342	323	19	41	29	48h>0h
Serp2	174.532	-2.7483	0.221953	-12.3823	3.25673e-35	2.74594e-33	95	57	103	42	53	50	246	307	338	0h>48h
Slc15a1	126.973	-6.32102	0.511342	-12.3616	4.21533e-35	3.54103e-33	5	8	6	5	1	4	227	257	246	0h>48h
Olfml3	114.25	4.13701	0.33622	12.3045	8.56738e-35	7.17036e-33	161	200	187	232	232	226	10	17	9	48h>0h
Socs5	1348.65	-1.73567	0.141101	-12.3009	8.96111e-35	7.47231e-33	988	993	984	587	785	631	1884	2088	2067	0h>48h
Ngfr	486.366	-2.62983	0.213864	-12.2967	9.43452e-35	7.83825e-33	320	261	294	119	167	149	566	921	995	0h>48h
Rasa3	1810.3	-1.98884	0.16189	-12.2851	1.08857e-34	9.01093e-33	989	940	1068	660	940	747	2147	3160	3222	0h>48h
Themis2	221.957	2.58979	0.211234	12.2603	1.47979e-34	1.22048e-32	409	402	407	366	501	360	54	65	66	48h>0h
Ccar2	944.016	-2.29852	0.187739	-12.2432	1.8265e-34	1.50097e-32	706	630	663	313	395	317	1066	1762	1822	0h>48h
Col6a3	1149.69	1.91765	0.156796	12.2302	2.14364e-34	1.75523e-32	1889	2051	1848	1817	2249	1774	463	460	473	48h>0h
Pkdcc	429.433	-2.90741	0.237939	-12.2191	2.45696e-34	2.00454e-32	156	189	174	115	122	87	491	850	910	0h>48h
Lonp2	2064.71	-1.82766	0.149839	-12.1975	3.20528e-34	2.6057e-32	999	982	1129	861	989	1051	2585	3326	3543	0h>48h
Wif1	116.523	-4.13237	0.339453	-12.1736	4.29669e-34	3.48048e-32	11	10	17	14	9	17	166	231	252	0h>48h
Reln	2533.81	1.40083	0.1151	12.1706	4.458e-34	3.59829e-32	2495	2131	2074	3626	4373	3789	1217	1454	1393	48h>0h
Zfp423	194.067	-2.86977	0.236209	-12.1493	5.78562e-34	4.65332e-32	68	69	82	57	48	44	283	328	388	0h>48h
Ppm1j	410.847	-3.34269	0.275309	-12.1416	6.3583e-34	5.09585e-32	147	127	155	66	81	89	430	904	901	0h>48h
Lipg	119.593	-4.50729	0.371405	-12.1358	6.82529e-34	5.45086e-32	17	16	25	12	6	14	169	232	274	0h>48h
Thbs2	954.707	2.49158	0.205439	12.128	7.50179e-34	5.97011e-32	785	840	758	1477	1744	1957	294	281	258	48h>0h
Gli2	212.08	3.16963	0.261554	12.1185	8.43208e-34	6.687e-32	266	220	158	386	476	366	23	55	48	48h>0h
Cxcl5	181.084	3.22008	0.26611	12.1006	1.04869e-33	8.28756e-32	169	179	183	288	355	402	35	35	32	48h>0h
Nr5a2	401.659	-2.74781	0.227472	-12.0798	1.35125e-33	1.06416e-31	112	109	130	100	106	126	626	837	577	0h>48h
Fmod	114.03	5.64152	0.467372	12.0707	1.50786e-33	1.18338e-31	35	26	38	208	276	234	7	4	2	48h>0h
Lgals7	282.211	-3.75615	0.312187	-12.0317	2.42011e-33	1.89277e-31	78	47	122	37	59	30	307	601	661	0h>48h
Ptpn9	575.877	-1.71951	0.142979	-12.0263	2.58409e-33	2.01408e-31	191	223	190	256	324	281	740	911	935	0h>48h
Fam129a	156.373	2.80237	0.233104	12.022	2.72341e-33	2.1154e-31	63	86	86	265	312	299	31	45	39	48h>0h
Mapk12	314.717	-2.42588	0.202559	-11.9761	4.73829e-33	3.66789e-31	177	163	154	83	127	108	399	573	592	0h>48h
Timp2	1028.06	2.42943	0.202905	11.9732	4.9087e-33	3.78688e-31	729	857	827	1628	1921	1997	274	269	397	48h>0h
Sema3f	1129.27	-2.13918	0.178748	-11.9676	5.25496e-33	4.04026e-31	544	545	436	407	519	417	1319	1893	2224	0h>48h
Samhd1	2578.36	-1.43959	0.120329	-11.9637	5.50205e-33	4.21595e-31	1779	1679	1630	1326	1637	1491	3165	4089	3776	0h>48h
Fam189a2	369.29	-2.42994	0.203742	-11.9266	8.60316e-33	6.56998e-31	170	140	144	114	138	119	434	669	740	0h>48h
P4ha1	3132.19	-1.4073	0.118206	-11.9055	1.1076e-32	8.43006e-31	2517	2726	3108	1724	1984	1785	3970	4519	4787	0h>48h
Olfml2b	313.179	2.32763	0.195793	11.8882	1.36262e-32	1.03363e-30	374	347	443	489	669	523	98	113	92	48h>0h
Cd82	844.914	-3.03385	0.255229	-11.8868	1.38642e-32	1.04818e-30	406	345	422	182	264	149	937	1682	1863	0h>48h
Rab4a	199.083	-2.70966	0.228075	-11.8806	1.49331e-32	1.12524e-30	67	84	66	62	50	56	307	336	363	0h>48h
Srgap3	467.885	-1.79861	0.151513	-11.871	1.6738e-32	1.25366e-30	213	204	179	205	250	215	645	763	712	0h>48h
Adrb1	102.725	-4.99745	0.42098	-11.871	1.67479e-32	1.25366e-30	12	10	14	5	7	8	143	194	251	0h>48h
Svep1	101.699	4.78503	0.403721	11.8523	2.09325e-32	1.56175e-30	67	78	58	177	230	223	3	10	8	48h>0h
Mmp9	624.574	-2.28549	0.192963	-11.8442	2.30731e-32	1.71581e-30	341	305	301	197	224	258	810	1022	1213	0h>48h
Sqle	2623.04	-1.44504	0.12205	-11.8397	2.43357e-32	1.80378e-30	1404	1324	1477	1402	1675	1442	3287	3783	4140	0h>48h
Col4a5	220.493	2.94968	0.2497	11.8129	3.34858e-32	2.47391e-30	178	214	228	434	479	340	43	64	41	48h>0h
Thbs1	4395.49	3.15384	0.267396	11.7947	4.15859e-32	3.06237e-30	4351	5048	4265	8155	8479	8588	1080	787	657	48h>0h
Aldoa	18937.9	-2.41722	0.204959	-11.7937	4.20631e-32	3.08749e-30	9792	9714	12084	5849	6765	6501	20485	33705	40568	0h>48h
Alx4	267.998	-2.47894	0.210227	-11.7918	4.305e-32	3.14973e-30	141	100	132	77	112	74	344	486	509	0h>48h
Ifitm1	139.92	-3.17095	0.269002	-11.7878	4.51137e-32	3.29011e-30	62	49	54	21	36	33	193	290	259	0h>48h
Kif3c	1571.76	-1.98827	0.169107	-11.7575	6.46435e-32	4.6993e-30	825	655	806	629	798	608	1844	2581	2980	0h>48h
Marcks	517.886	1.97919	0.16844	11.7501	7.05307e-32	5.11089e-30	576	541	703	891	874	869	193	213	204	48h>0h
Plb1	510.738	-1.89606	0.161393	-11.7481	7.22123e-32	5.21607e-30	278	260	242	217	231	243	654	899	809	0h>48h
Igf2	1219.35	-1.81867	0.154851	-11.7446	7.52584e-32	5.41885e-30	833	805	860	550	611	563	1391	2115	2102	0h>48h
Jph4	136.286	-3.33493	0.284685	-11.7145	1.07476e-31	7.71411e-30	44	45	30	29	32	18	183	286	263	0h>48h
Kcna6	103.876	-4.09831	0.35011	-11.7058	1.19046e-31	8.51763e-30	15	11	12	10	19	8	183	207	181	0h>48h
Cyp26b1	193.575	3.2233	0.275504	11.6996	1.27982e-31	9.12816e-30	373	387	355	323	483	324	35	28	46	48h>0h
Nrd1	1715.47	-1.82378	0.156031	-11.6886	1.45819e-31	1.03678e-29	751	726	831	773	843	800	2564	2750	2445	0h>48h
Ldha	5592.16	-2.03036	0.173711	-11.6882	1.46455e-31	1.03805e-29	2995	3007	4826	2280	2463	2290	6456	9010	11059	0h>48h
Tanc1	4081.77	-1.36339	0.116789	-11.6739	1.73217e-31	1.22391e-29	2274	2114	2079	2254	2787	2295	5183	6117	5851	0h>48h
Gstm1	828.015	1.78474	0.152996	11.6652	1.91863e-31	1.35144e-29	462	571	703	1288	1407	1407	291	429	375	48h>0h
Dll1	103.463	4.36614	0.374389	11.6621	1.99186e-31	1.39868e-29	112	92	127	170	263	204	8	7	13	48h>0h
Ddit4	2677.44	-3.34808	0.287266	-11.655	2.16469e-31	1.51535e-29	1365	1296	1839	491	640	413	2524	5463	6636	0h>48h
Rab11fip4	7631.35	2.21596	0.190193	11.6512	2.26368e-31	1.57977e-29	14648	12081	13550	12246	16620	11629	1832	2984	3194	48h>0h
Arntl	849.992	-1.90882	0.163865	-11.6487	2.32874e-31	1.62019e-29	435	447	502	335	454	361	1208	1495	1211	0h>48h
Slit2	150.715	2.86038	0.245691	11.6422	2.51446e-31	1.74405e-29	250	256	244	253	305	290	37	36	33	48h>0h
Kcnj12	153.713	-3.25935	0.280705	-11.6113	3.61029e-31	2.49649e-29	72	59	79	35	32	26	198	280	344	0h>48h
Gatm	400.828	2.0595	0.177719	11.5885	4.71223e-31	3.24857e-29	356	321	510	675	667	718	135	164	154	48h>0h
Lamc2	187.581	-2.41608	0.209206	-11.5488	7.48377e-31	5.14362e-29	70	109	86	63	73	54	262	351	313	0h>48h
Acvrl1	313.653	-2.61548	0.226632	-11.5406	8.23144e-31	5.6404e-29	108	89	113	94	102	86	363	573	662	0h>48h
Syngr2	1035.19	-1.95565	0.170012	-11.503	1.27363e-30	8.70098e-29	744	697	920	408	562	398	1234	1755	1862	0h>48h
Dpysl3	258.978	2.79318	0.243286	11.4811	1.64219e-30	1.11851e-28	297	319	338	492	511	443	74	58	56	48h>0h
Loxl2	1465.85	1.62363	0.141746	11.4545	2.23291e-30	1.51631e-28	1701	1940	2234	2289	2329	2441	598	753	752	48h>0h
Insig1	4639.75	-1.49421	0.130709	-11.4316	2.906e-30	1.96749e-28	3117	2639	2999	2250	2990	2572	5803	6796	7425	0h>48h
Sept11	2968.42	-1.5627	0.136771	-11.4257	3.11066e-30	2.09979e-28	1687	1732	1953	1423	1833	1566	4048	4692	4172	0h>48h
Miat	112.546	-4.86154	0.426098	-11.4094	3.75138e-30	2.52478e-28	8	13	14	11	9	4	138	289	221	0h>48h
Slc5a4a	88.0078	-5.28976	0.463947	-11.4016	4.10293e-30	2.75321e-28	2	6	2	4	3	7	152	163	185	0h>48h
Celsr1	456.315	-1.94767	0.170905	-11.3962	4.36756e-30	2.92215e-28	482	392	431	189	247	169	585	771	771	0h>48h
Cd93	155.152	-2.953	0.259293	-11.3887	4.76172e-30	3.17649e-28	17	21	16	47	34	32	227	303	275	0h>48h
Fbxo40	86.636	4.85309	0.426334	11.3833	5.0644e-30	3.3685e-28	41	45	61	172	206	160	4	7	6	48h>0h
Pak6	278.119	-2.70138	0.237507	-11.3739	5.64206e-30	3.74174e-28	171	184	180	95	84	58	365	529	526	0h>48h
Nos1	415.845	-1.9589	0.172393	-11.3629	6.39507e-30	4.22876e-28	476	410	389	174	204	168	494	720	736	0h>48h
Chrd	169.01	-2.96383	0.260847	-11.3623	6.44083e-30	4.24664e-28	129	120	112	48	45	30	227	308	347	0h>48h
Mt1	4582.06	-1.91873	0.168927	-11.3583	6.74322e-30	4.43313e-28	1397	1649	1577	1757	2322	2077	5476	8979	6921	0h>48h
Tor3a	476.734	-1.96993	0.173849	-11.3313	9.18454e-30	6.02065e-28	199	212	236	189	249	186	576	804	857	0h>48h
Fam81a	348.26	-1.80391	0.159906	-11.281	1.62844e-29	1.0644e-27	273	260	301	154	182	161	456	550	578	0h>48h
Msmo1	1314.42	-2.07081	0.183844	-11.264	1.97659e-29	1.28567e-27	464	502	501	458	580	581	2099	2149	1896	0h>48h
Epcam	3709.3	-1.66832	0.148113	-11.2639	1.9783e-29	1.28567e-27	1877	1693	2065	1680	2317	1724	4378	5938	6280	0h>48h
Mical1	491.377	-2.27334	0.201867	-11.2616	2.03121e-29	1.31628e-27	229	174	236	169	198	173	611	762	1024	0h>48h
Pdgfrb	284.636	2.2193	0.197105	11.2595	2.07961e-29	1.34381e-27	409	409	496	455	546	501	80	93	122	48h>0h
Ggt5	89.0337	-4.45048	0.396055	-11.237	2.68288e-29	1.72871e-27	16	12	16	5	9	11	122	180	201	0h>48h
Dpf1	813.659	-2.2041	0.196872	-11.1956	4.28421e-29	2.7527e-27	658	494	557	304	367	262	941	1390	1622	0h>48h
Rasgrf1	136.909	-3.1592	0.282562	-11.1806	5.07628e-29	3.25241e-27	52	43	48	35	30	23	237	259	218	0h>48h
Ephb3	802.99	-2.39515	0.215576	-11.1105	1.11519e-28	7.12495e-27	283	244	289	254	323	248	867	1470	1672	0h>48h
Tnc	1521.94	2.0072	0.180695	11.1082	1.1443e-28	7.2904e-27	1983	2092	1724	2456	2772	2571	627	571	551	48h>0h
Wisp1	164.833	4.56356	0.412724	11.0572	2.024e-28	1.28589e-26	248	297	306	343	283	375	21	10	7	48h>0h
Fam198b	123.955	3.51681	0.3185	11.0418	2.40163e-28	1.52155e-26	137	145	177	264	206	252	19	21	18	48h>0h
Anxa3	181.105	2.46313	0.22345	11.0232	2.95392e-28	1.86623e-26	181	154	212	330	316	331	44	59	60	48h>0h
Col6a1	1599.63	1.55567	0.141435	10.9992	3.85584e-28	2.42928e-26	2003	1989	2184	2577	2679	2376	643	833	908	48h>0h
Hid1	352.762	-2.10761	0.192004	-10.9769	4.93609e-28	3.10126e-26	255	281	251	146	170	111	493	572	608	0h>48h
Itgb2	84.3104	-5.04439	0.460018	-10.9656	5.59043e-28	3.50267e-26	12	7	8	2	8	6	116	175	193	0h>48h
Capg	902.723	-2.49074	0.227319	-10.957	6.15152e-28	3.8436e-26	354	339	435	324	319	230	1005	1720	1825	0h>48h
Cplx2	145.307	-3.27077	0.298695	-10.9502	6.63235e-28	4.13265e-26	27	26	32	26	25	36	176	312	293	0h>48h
Ccdc80	89.2127	5.30321	0.484514	10.9454	6.98878e-28	4.34281e-26	97	110	128	200	183	172	1	6	6	48h>0h
Tbxa2r	322.415	-3.46812	0.317831	-10.9118	1.01207e-27	6.27181e-26	52	42	40	58	50	62	315	655	801	0h>48h
Ophn1	431.572	1.73769	0.159354	10.9046	1.09565e-27	6.77127e-26	489	435	504	644	827	663	178	210	193	48h>0h
Pecam1	180.236	-2.38425	0.218946	-10.8897	1.29051e-27	7.95385e-26	54	51	53	58	61	66	278	317	285	0h>48h
Mmd	2524.66	-1.43074	0.131512	-10.8791	1.44951e-27	8.9096e-26	1649	1510	1659	1389	1653	1342	3144	3574	4044	0h>48h
Zfp467	316.304	-2.31207	0.21286	-10.862	1.74957e-27	1.07249e-25	172	120	165	113	135	93	371	608	579	0h>48h
Adamts2	392.056	1.86638	0.172017	10.85	1.9949e-27	1.21958e-25	459	497	520	630	708	631	163	163	164	48h>0h
Lmo2	133.233	-2.76837	0.255184	-10.8485	2.02683e-27	1.23576e-25	69	60	64	31	48	31	183	240	260	0h>48h
Rhd	307.186	-2.19807	0.202727	-10.8425	2.16558e-27	1.31682e-25	170	148	183	112	114	125	366	556	567	0h>48h
Nbeal2	1452.62	-1.76051	0.162441	-10.8379	2.27683e-27	1.38077e-25	1156	1006	932	641	891	604	1755	2398	2442	0h>48h
Adgrb2	1313.39	-2.13551	0.197175	-10.8305	2.46781e-27	1.4926e-25	1005	873	918	497	598	469	1432	2271	2640	0h>48h
Ltbp4	116.405	2.86894	0.26514	10.8205	2.7538e-27	1.66114e-25	410	478	482	213	256	189	24	29	29	48h>0h
Pla2g7	545.194	-1.96301	0.181762	-10.7999	3.44593e-27	2.07314e-25	130	112	138	208	248	256	798	791	933	0h>48h
Inhba	115.062	5.76236	0.533582	10.7994	3.46466e-27	2.07889e-25	149	162	145	286	207	222	7	5	0	48h>0h
Epha1	680.565	-2.3005	0.213089	-10.796	3.59673e-27	2.15244e-25	341	361	389	211	316	215	760	1299	1297	0h>48h
Dalrd3	262.595	-2.03817	0.188999	-10.784	4.09549e-27	2.44447e-25	222	176	178	92	123	115	349	422	466	0h>48h
C1qtnf3	144.894	4.53899	0.42109	10.7791	4.31951e-27	2.57141e-25	74	72	62	252	286	347	19	10	5	48h>0h
Dusp5	1714.44	-2.02158	0.187601	-10.7759	4.47161e-27	2.65499e-25	1138	962	1154	624	837	717	2086	2557	3451	0h>48h
Sall2	245.993	-2.54067	0.235804	-10.7745	4.54157e-27	2.68949e-25	106	80	101	70	101	62	299	449	493	0h>48h
Gm807	94.1772	-3.44713	0.320245	-10.764	5.0891e-27	3.00588e-25	14	17	28	11	23	17	152	191	161	0h>48h
Cyp26a1	157.138	2.73404	0.254091	10.7601	5.31133e-27	3.12899e-25	780	744	774	256	373	254	29	46	46	48h>0h
Cd9	2455.64	-1.45301	0.135126	-10.753	5.73454e-27	3.36956e-25	1387	1329	1630	1210	1563	1443	2969	3645	3923	0h>48h
Tmem59l	1079.49	-2.56712	0.239479	-10.7196	8.23632e-27	4.82708e-25	795	744	720	286	376	339	1086	2102	2324	0h>48h
Frmd6	1516.11	-1.45725	0.136113	-10.7062	9.52246e-27	5.56646e-25	1076	976	1037	825	995	779	1998	2192	2284	0h>48h
Crlf1	1199.56	-2.29703	0.214785	-10.6946	1.07938e-26	6.29345e-25	626	614	758	424	519	362	1293	2184	2443	0h>48h
Eno1	19301.5	-1.7525	0.163995	-10.6863	1.1793e-26	6.85838e-25	13151	12090	16139	8682	9985	9604	22960	28294	36249	0h>48h
Sirpa	1009.39	-1.66254	0.155722	-10.6763	1.31367e-26	7.62028e-25	589	549	541	457	629	475	1174	1676	1667	0h>48h
Gm1141	307.956	2.02019	0.189308	10.6715	1.384e-26	8.00775e-25	282	321	304	502	548	529	112	137	106	48h>0h
Frmpd1	313.026	2.38265	0.223351	10.6677	1.44157e-26	8.31967e-25	669	553	508	497	676	519	76	89	131	48h>0h
Itpr3	5758.6	-1.5481	0.145133	-10.6667	1.45643e-26	8.38407e-25	4988	4485	4415	2887	3644	2901	6405	9176	9717	0h>48h
Vsig10	672.715	-2.09286	0.196589	-10.6458	1.82354e-26	1.04708e-24	368	327	361	255	343	226	773	1215	1235	0h>48h
Ebf3	370.104	1.8486	0.173694	10.6429	1.88231e-26	1.0781e-24	327	301	299	540	736	588	145	156	168	48h>0h
Thnsl2	245.546	-2.45458	0.230966	-10.6274	2.22115e-26	1.26897e-24	134	113	169	80	70	91	323	411	486	0h>48h
Hlx	227.642	-3.93173	0.370053	-10.6248	2.28537e-26	1.30237e-24	31	41	22	15	33	42	267	417	586	0h>48h
Kirrel	212.328	2.1667	0.204002	10.621	2.38044e-26	1.35315e-24	236	300	307	374	376	359	61	90	76	48h>0h
Hk2	4807.22	-1.85464	0.174859	-10.6065	2.78004e-26	1.57635e-24	3841	3512	4067	1957	2764	1996	5362	8249	8652	0h>48h
Sohlh1	2624.08	1.96167	0.184992	10.6041	2.85304e-26	1.61371e-24	5029	3943	5111	4190	5360	3892	744	1128	1299	48h>0h
Gcnt4	377.192	-2.99154	0.282417	-10.5926	3.22402e-26	1.81901e-24	153	161	162	88	91	90	728	744	454	0h>48h
Postn	1302.86	3.92196	0.371082	10.569	4.14955e-26	2.33539e-24	603	1037	959	2676	2086	2968	228	121	103	48h>0h
1810041L15Rik	366.775	-1.77784	0.168698	-10.5386	5.73424e-26	3.21927e-24	259	240	238	181	199	151	477	587	598	0h>48h
Fzd2	1487.05	-2.67535	0.253989	-10.5334	6.06347e-26	3.39569e-24	782	637	704	365	446	477	1565	2559	3529	0h>48h
Trio	1427.67	-1.35528	0.128737	-10.5275	6.45382e-26	3.6054e-24	931	773	808	806	946	820	1770	2266	1965	0h>48h
Sdcbp2	120.879	-2.77179	0.263309	-10.5267	6.50467e-26	3.62488e-24	49	39	28	34	36	29	155	226	241	0h>48h
Arrdc4	1079.79	-1.52815	0.1452	-10.5244	6.66795e-26	3.70676e-24	922	806	1002	599	628	551	1415	1541	1719	0h>48h
Osbpl6	330.788	-1.82968	0.173901	-10.5214	6.8861e-26	3.81867e-24	134	104	119	143	175	148	444	585	481	0h>48h
Tfeb	912.855	-2.66542	0.253379	-10.5195	7.02308e-26	3.88513e-24	475	392	458	238	368	200	1062	1577	2033	0h>48h
Cyp2s1	93.3042	-3.06344	0.291253	-10.5181	7.12627e-26	3.93262e-24	46	38	42	22	25	17	136	187	166	0h>48h
Col26a1	112.435	-3.36121	0.319664	-10.5148	7.38174e-26	4.06372e-24	77	84	70	18	23	23	131	229	249	0h>48h
Lama4	503.269	1.59315	0.151518	10.5146	7.40209e-26	4.06506e-24	615	560	597	782	848	787	221	246	264	48h>0h
Lzts1	392.61	-1.97426	0.18797	-10.5031	8.36051e-26	4.58031e-24	270	233	246	148	196	168	449	717	684	0h>48h
Bmper	96.0031	3.35193	0.319284	10.4983	8.79882e-26	4.80882e-24	129	97	178	175	178	204	15	15	20	48h>0h
Hcn2	520.637	1.83761	0.175317	10.4817	1.04893e-25	5.71894e-24	1054	1046	911	766	1001	847	200	204	260	48h>0h
Rec8	828.768	1.50359	0.143461	10.4808	1.05793e-25	5.75416e-24	2393	2050	2154	1220	1510	1207	340	489	441	48h>0h
Hmgcr	5155.87	-1.27663	0.121927	-10.4705	1.18054e-25	6.4057e-24	2873	2783	2982	2920	3713	3046	6516	7328	7427	0h>48h
Cadps2	467.745	1.58202	0.15118	10.4645	1.25787e-25	6.80901e-24	777	738	730	697	827	724	198	231	256	48h>0h
Cd200	88.1528	3.41474	0.326917	10.4453	1.54002e-25	8.31646e-24	92	164	143	158	170	186	15	15	14	48h>0h
Cacnb1	493.989	-2.06173	0.197593	-10.4342	1.73006e-25	9.32052e-24	236	162	233	201	224	187	541	900	921	0h>48h
Ap5b1	591.112	2.12879	0.204196	10.4252	1.90173e-25	1.02211e-23	591	544	514	870	1265	969	146	263	243	48h>0h
Pfkl	2169.43	-2.27446	0.218321	-10.418	2.05276e-25	1.10068e-23	1503	1510	1978	775	943	672	2360	3639	4666	0h>48h
Ryr1	871.274	-1.4636	0.140492	-10.4176	2.06078e-25	1.10237e-23	918	669	669	467	568	454	1014	1341	1401	0h>48h
Lhx2	385.904	-1.93434	0.185828	-10.4093	2.24772e-25	1.19954e-23	207	213	197	138	211	167	470	669	662	0h>48h
Igf2bp1	7395.2	-1.41857	0.136416	-10.3988	2.51017e-25	1.33576e-23	4146	3908	3771	4006	5011	3924	8214	11612	11865	0h>48h
Bmp6	304.644	-2.30883	0.222031	-10.3986	2.51474e-25	1.33576e-23	247	205	210	113	111	103	353	521	625	0h>48h
Kcnt1	265.152	2.12186	0.204139	10.3942	2.63464e-25	1.39618e-23	780	655	676	471	442	460	89	110	90	48h>0h
Lhx1os	103.688	-3.88433	0.374744	-10.3653	3.56741e-25	1.88607e-23	28	13	27	10	12	20	138	259	178	0h>48h
Zmym3	4587.48	1.30258	0.125701	10.3625	3.67364e-25	1.93772e-23	11036	9511	10048	6132	8020	6825	2148	2734	2879	48h>0h
Slc1a1	126.788	-2.86389	0.276394	-10.3616	3.70635e-25	1.95043e-23	29	32	60	25	45	29	172	266	219	0h>48h
Prkab1	725.845	-1.80811	0.174807	-10.3435	4.47933e-25	2.35175e-23	459	410	409	339	401	296	831	1204	1296	0h>48h
Mypop	290.23	-2.60322	0.25183	-10.3372	4.7833e-25	2.50555e-23	117	123	129	82	105	77	306	592	587	0h>48h
Sgsm1	490.239	-1.57941	0.15287	-10.3318	5.06238e-25	2.64562e-23	327	299	263	235	295	259	578	789	792	0h>48h
Cers4	249.086	-1.87628	0.181833	-10.3187	5.79858e-25	3.02339e-23	178	156	155	105	129	108	356	400	384	0h>48h
Fmnl1	583.335	-1.89137	0.183404	-10.3126	6.18198e-25	3.21591e-23	404	385	334	227	312	258	653	1026	1038	0h>48h
Zfp618	373.869	-1.94484	0.189016	-10.2893	7.87452e-25	4.087e-23	189	191	188	150	168	175	466	714	566	0h>48h
Zfp365	278.515	-2.26037	0.219693	-10.2887	7.92032e-25	4.10139e-23	89	119	114	114	105	88	441	491	405	0h>48h
Kcnj15	100.207	-3.56034	0.346084	-10.2875	8.02288e-25	4.14503e-23	9	17	22	13	15	22	157	231	153	0h>48h
Fam43a	692.761	-2.0755	0.201795	-10.2852	8.21775e-25	4.23606e-23	294	212	302	263	304	284	738	1245	1340	0h>48h
Set	6169.92	-1.21426	0.118114	-10.2804	8.63634e-25	4.44174e-23	4841	4379	5244	3729	4488	3710	6838	9295	9199	0h>48h
Cdk5r1	208.419	2.0875	0.20308	10.2792	8.7445e-25	4.48719e-23	311	317	264	340	431	315	63	85	85	48h>0h
Sh3tc1	149.515	-2.95401	0.287721	-10.2669	9.93311e-25	5.08562e-23	55	72	54	39	45	26	176	306	304	0h>48h
Gm10687	70.4652	-4.35572	0.42435	-10.2644	1.01903e-24	5.20556e-23	7	13	17	9	7	5	107	166	122	0h>48h
Six4	679.396	-2.30332	0.224889	-10.242	1.28513e-24	6.5501e-23	327	337	278	254	243	233	1130	1270	869	0h>48h
1500009L16Rik	474.077	-1.98402	0.194047	-10.2244	1.54119e-24	7.83759e-23	212	136	192	194	239	182	526	839	875	0h>48h
6030458C11Rik	1721.97	-1.38048	0.135112	-10.2173	1.65823e-24	8.41395e-23	1245	1203	1351	941	1189	941	2227	2654	2373	0h>48h
Nr2f2	68.7656	4.11009	0.402299	10.2165	1.67274e-24	8.46863e-23	88	106	102	135	157	125	7	9	6	48h>0h
Cntn2	116.017	-3.59436	0.351941	-10.213	1.73481e-24	8.76328e-23	34	29	36	24	23	10	143	257	236	0h>48h
Nin	685.065	-2.25074	0.2205	-10.2074	1.83679e-24	9.25784e-23	276	259	288	229	284	250	1122	1297	860	0h>48h
Tspan8	112.319	-3.01021	0.295762	-10.1778	2.49085e-24	1.25266e-22	38	22	43	24	36	20	176	234	174	0h>48h
Col6a4	149.327	-2.49049	0.244874	-10.1705	2.68536e-24	1.34749e-22	99	87	69	56	47	41	200	289	256	0h>48h
B4gat1	376.321	-2.36094	0.232295	-10.1636	2.88339e-24	1.44367e-22	111	80	116	138	126	127	439	615	808	0h>48h
Igfbp5	252.432	-2.4419	0.240285	-10.1625	2.91433e-24	1.45595e-22	178	316	323	80	95	77	272	508	488	0h>48h
Dusp8	252.234	2.42046	0.238619	10.1436	3.53701e-24	1.76314e-22	261	278	249	424	535	407	79	60	91	48h>0h
Zic4	127.811	-4.95536	0.489069	-10.1322	3.97453e-24	1.97689e-22	13	2	9	17	2	6	197	232	297	0h>48h
Chst1	365.546	-1.95506	0.193066	-10.1264	4.21917e-24	2.09398e-22	258	222	242	135	196	152	434	605	674	0h>48h
Eef2k	1827.01	1.75675	0.174077	10.0918	6.00466e-24	2.97362e-22	3460	3127	3479	2754	3650	2678	586	967	915	48h>0h
Chn2	359.954	-1.92604	0.190995	-10.0843	6.4851e-24	3.20454e-22	170	159	159	151	188	143	451	544	678	0h>48h
Fam124a	253.671	1.87251	0.185696	10.0837	6.51987e-24	3.21472e-22	306	307	327	402	445	428	82	120	118	48h>0h
Ankrd13d	497.747	-1.71661	0.170477	-10.0694	7.54373e-24	3.71148e-22	362	349	399	243	251	248	578	800	869	0h>48h
Lgals3bp	367.98	1.62008	0.160927	10.0672	7.71418e-24	3.78713e-22	573	576	609	533	643	603	155	183	190	48h>0h
1700017B05Rik	1566.14	-1.9916	0.198327	-10.042	9.96007e-24	4.87914e-22	1030	969	910	590	828	611	1707	2626	3079	0h>48h
Fam160b1	823.219	-1.69558	0.170046	-9.97131	2.03534e-23	9.94903e-22	387	395	441	398	471	377	1198	1345	1109	0h>48h
Mgst1	108.286	3.32172	0.333431	9.96225	2.22962e-23	1.08753e-21	83	125	209	195	195	236	22	22	13	48h>0h
Nsg1	306.217	-1.9715	0.197904	-9.96191	2.23716e-23	1.08887e-21	241	202	261	118	164	119	358	565	518	0h>48h
Cpe	340.245	2.4076	0.242222	9.93964	2.79843e-23	1.35912e-21	393	402	560	601	629	598	114	79	118	48h>0h
Adamts12	70.531	5.49525	0.553293	9.9319	3.02424e-23	1.46566e-21	64	66	49	144	150	147	1	5	3	48h>0h
Cnn1	69.1463	4.35681	0.438844	9.92793	3.14717e-23	1.52198e-21	42	58	58	141	156	126	3	11	5	48h>0h
Anxa5	530.306	1.65214	0.166745	9.90818	3.83551e-23	1.85092e-21	619	760	885	827	838	900	219	254	275	48h>0h
Egr1	2002.96	-1.79781	0.18154	-9.90313	4.03441e-23	1.94277e-21	751	710	694	855	1149	877	2135	3698	3387	0h>48h
Gmpr	534.719	-2.33499	0.23671	-9.86433	5.94283e-23	2.85571e-21	379	334	426	202	211	154	606	872	1164	0h>48h
Grm4	838.573	-1.91089	0.193758	-9.86224	6.06783e-23	2.90961e-21	905	829	705	338	476	323	932	1466	1521	0h>48h
Tbx1	157.07	2.72558	0.276439	9.85962	6.22819e-23	2.9802e-21	146	173	117	292	305	276	25	39	58	48h>0h
Usp11	1488.12	-1.46173	0.148346	-9.85349	6.6203e-23	3.16116e-21	1514	1368	1347	707	1044	805	1834	2280	2277	0h>48h
Id4	477.035	-1.6216	0.164829	-9.83804	7.72022e-23	3.67862e-21	143	127	121	242	286	223	610	690	805	0h>48h
Pik3c2b	2083.51	-1.7048	0.173327	-9.83576	7.89671e-23	3.75483e-21	1444	1201	1016	975	1301	878	2342	3624	3447	0h>48h
Pstpip1	215.345	-2.87028	0.292952	-9.79778	1.15087e-22	5.46084e-21	78	60	79	55	59	52	212	446	475	0h>48h
Tinagl1	208.562	2.17595	0.222287	9.7889	1.25651e-22	5.94964e-21	278	324	352	406	367	316	64	78	79	48h>0h
Rltpr	184.346	-2.55492	0.26146	-9.77174	1.48879e-22	7.03483e-21	111	88	83	67	66	39	234	341	354	0h>48h
Ildr2	188.353	2.33028	0.238537	9.76905	1.52883e-22	7.20902e-21	329	273	306	321	360	324	65	68	48	48h>0h
Myo5b	95.8183	-3.28756	0.336754	-9.76248	1.63111e-22	7.67535e-21	72	51	75	12	20	25	172	176	155	0h>48h
Sri	155.614	2.25812	0.231595	9.75031	1.83902e-22	8.61792e-21	163	147	206	285	288	250	42	65	51	48h>0h
Lpl	89.7088	3.55189	0.364282	9.75039	1.83763e-22	8.61792e-21	63	41	63	154	155	216	14	14	13	48h>0h
Pmaip1	453.594	-2.80646	0.28792	-9.74738	1.89289e-22	8.8521e-21	117	132	120	111	146	108	835	945	509	0h>48h
Arhgef9	149.735	-2.69564	0.276771	-9.73958	2.04394e-22	9.53882e-21	34	30	40	33	43	52	252	281	219	0h>48h
Lrp3	107.421	2.80632	0.288167	9.73855	2.06489e-22	9.61681e-21	170	143	136	212	227	164	20	33	26	48h>0h
Nfatc2	1375.22	-1.47987	0.151987	-9.73685	2.09965e-22	9.75863e-21	1101	1018	755	687	968	686	1662	2235	2040	0h>48h
Itga6	2322.48	-1.6529	0.169827	-9.73287	2.18334e-22	1.01269e-20	1615	1607	1766	1071	1311	1210	3422	3754	3039	0h>48h
Atp1a2	79.7014	-3.05102	0.313565	-9.73009	2.24387e-22	1.03864e-20	15	18	18	20	20	15	111	146	161	0h>48h
Prkd2	555.625	-1.82194	0.187386	-9.7229	2.40812e-22	1.11239e-20	373	317	351	237	327	226	658	873	1019	0h>48h
4932442L08Rik	281.968	2.35736	0.24256	9.71866	2.51069e-22	1.15742e-20	304	289	361	425	537	548	102	82	81	48h>0h
Med13l	6618.3	-1.47878	0.152514	-9.69606	3.13368e-22	1.44169e-20	4017	3299	3161	3523	4321	3384	8653	11154	8622	0h>48h
Arid3a	1535.96	-1.39073	0.143671	-9.6799	3.67064e-22	1.6853e-20	1377	1258	1339	833	1064	830	1697	2425	2426	0h>48h
Pik3cd	3002.93	-1.35723	0.140433	-9.66466	4.26015e-22	1.95201e-20	2282	2080	2306	1637	2042	1734	3355	4385	4959	0h>48h
Fgd5	668.637	-1.62922	0.169475	-9.61335	7.0227e-22	3.21133e-20	372	356	439	297	438	319	787	1072	1113	0h>48h
Dgki	247.969	2.32084	0.241568	9.60739	7.44106e-22	3.39579e-20	306	211	250	405	540	387	57	77	110	48h>0h
Ncmap	244.115	-1.71565	0.178599	-9.60617	7.52972e-22	3.42935e-20	111	89	83	114	130	121	299	414	386	0h>48h
Ero1l	7441.74	-1.9766	0.20578	-9.60542	7.58508e-22	3.44764e-20	3922	4384	4586	2941	3476	3241	12673	11925	9532	0h>48h
Klk8	426.611	-1.79765	0.187308	-9.59729	8.20769e-22	3.72317e-20	330	243	335	162	228	222	524	674	748	0h>48h
Adcy5	818.236	-1.56573	0.16325	-9.591	8.72319e-22	3.94912e-20	604	555	537	407	495	424	903	1279	1425	0h>48h
Ccl2	355.915	1.91072	0.19955	9.57516	1.01697e-21	4.59479e-20	297	353	338	549	601	645	131	177	129	48h>0h
Pbx3	428.096	-1.59903	0.167053	-9.57198	1.04877e-21	4.72907e-20	249	243	266	239	237	203	573	644	659	0h>48h
Stac2	684.425	-1.70999	0.178705	-9.5688	1.08158e-21	4.86731e-20	562	570	576	295	412	325	755	1146	1196	0h>48h
Bmp4	137.418	-2.48525	0.259787	-9.56646	1.10631e-21	4.96875e-20	29	38	47	46	55	33	184	279	223	0h>48h
Fam114a1	165.999	2.09054	0.21857	9.56462	1.12611e-21	5.04769e-20	172	174	197	299	289	270	51	70	64	48h>0h
Adamts5	89.0958	3.81548	0.398948	9.56386	1.13447e-21	5.07513e-20	50	42	73	148	196	189	16	13	5	48h>0h
She	221.969	-1.90348	0.199085	-9.56117	1.16433e-21	5.19844e-20	91	87	115	88	116	97	262	399	372	0h>48h
Ptx3	79.0009	3.99148	0.417521	9.55994	1.1782e-21	5.25007e-20	70	65	78	155	209	116	12	8	7	48h>0h
Tmem130	280.154	-1.6365	0.171205	-9.55869	1.19256e-21	5.3036e-20	157	135	122	146	161	130	351	453	438	0h>48h
Rasd1	101.51	-2.66736	0.279101	-9.55695	1.21281e-21	5.38081e-20	32	44	40	27	38	24	132	187	198	0h>48h
Tacc1	832.053	-1.30964	0.137038	-9.55679	1.21466e-21	5.38081e-20	600	612	723	473	567	494	975	1338	1164	0h>48h
Ndrg2	249.598	-2.01137	0.210684	-9.54685	1.33697e-21	5.91106e-20	203	219	270	95	114	109	291	409	480	0h>48h
En1	318.848	-2.88693	0.302632	-9.5394	1.43655e-21	6.339e-20	91	91	85	71	121	55	367	566	734	0h>48h
Actg2	103.968	7.23971	0.75926	9.53522	1.49564e-21	6.5869e-20	44	52	65	218	244	200	1	1	2	48h>0h
Mgat3	210.559	-1.91644	0.200997	-9.53465	1.50393e-21	6.6106e-20	112	133	112	90	105	88	247	379	356	0h>48h
Grin2a	82.1198	-4.37702	0.459152	-9.53284	1.53041e-21	6.71396e-20	13	16	15	6	6	12	159	188	106	0h>48h
Cntnap1	111.452	-2.64108	0.27716	-9.5291	1.5865e-21	6.94662e-20	77	66	77	22	39	38	172	194	194	0h>48h
Fetub	190.548	-2.13254	0.223862	-9.52612	1.63271e-21	7.13518e-20	59	74	82	58	84	85	283	301	319	0h>48h
Foxj2	676.587	-1.39662	0.146926	-9.50556	1.98968e-21	8.67843e-20	398	337	374	384	430	379	775	1007	1098	0h>48h
Gfra3	105.734	2.85908	0.300987	9.49901	2.11886e-21	9.22417e-20	385	377	360	175	201	217	29	23	22	48h>0h
Scml4	103.346	-2.62133	0.276077	-9.49491	2.20399e-21	9.57637e-20	39	25	40	23	37	33	135	203	186	0h>48h
Cbr3	117.035	-3.77843	0.398184	-9.48916	2.32914e-21	1.01008e-19	20	17	16	14	18	19	109	242	304	0h>48h
Timp3	310.88	2.55465	0.269614	9.47519	2.66281e-21	1.15258e-19	423	508	503	507	498	682	96	93	72	48h>0h
Lfng	390.459	-2.28161	0.24095	-9.46923	2.81906e-21	1.21789e-19	275	268	287	128	172	129	407	694	825	0h>48h
Lox	3462.18	3.11145	0.328605	9.46867	2.83437e-21	1.22217e-19	2506	3696	3161	6410	6221	7121	962	596	463	48h>0h
Cd7	76.863	-3.98808	0.421399	-9.46392	2.96621e-21	1.27659e-19	10	2	8	13	7	9	87	176	168	0h>48h
Arhgef25	801.821	-1.558	0.164631	-9.46359	2.9755e-21	1.27817e-19	537	448	521	414	510	383	883	1332	1317	0h>48h
Polr1a	2347.26	1.12328	0.118893	9.44779	3.46064e-21	1.48376e-19	2624	2168	2370	3067	3889	3373	1273	1544	1499	48h>0h
Islr	66.6278	3.38811	0.358836	9.44193	3.65963e-21	1.56612e-19	72	59	70	109	150	132	10	13	11	48h>0h
Igf2bp2	1056.92	-1.33597	0.14168	-9.42947	4.12178e-21	1.76057e-19	749	652	723	608	681	630	1384	1597	1426	0h>48h
Synj2	280.09	-1.72021	0.182973	-9.40144	5.38231e-21	2.29467e-19	133	140	123	140	135	141	369	471	416	0h>48h
Ccdc8	282.355	-2.16522	0.23041	-9.39726	5.60047e-21	2.38319e-19	219	201	244	97	137	98	305	542	524	0h>48h
Cited1	352.119	1.74825	0.186057	9.39632	5.65056e-21	2.40001e-19	446	370	494	510	693	544	133	151	189	48h>0h
Cyth4	133.058	-2.76538	0.294529	-9.38917	6.04733e-21	2.56373e-19	37	33	18	30	45	35	144	279	268	0h>48h
Pvrl1	934.823	-1.60801	0.171338	-9.38503	6.29002e-21	2.66164e-19	1506	1318	1111	458	588	440	1011	1574	1575	0h>48h
Sugt1	611.216	1.33414	0.142258	9.37831	6.7041e-21	2.83158e-19	687	610	831	879	1049	880	285	351	381	48h>0h
Kif19a	132.952	-2.53722	0.270635	-9.37504	6.91489e-21	2.91518e-19	80	63	76	40	54	32	171	222	275	0h>48h
Esrrb	635.869	-1.52638	0.162876	-9.37143	7.15541e-21	3.01098e-19	554	440	459	296	409	349	719	1028	1033	0h>48h
Ank1	285.869	-1.85645	0.198179	-9.36751	7.4262e-21	3.11914e-19	156	186	180	133	160	105	351	474	492	0h>48h
Pcbp4	2948.67	-2.22927	0.238092	-9.36305	7.74644e-21	3.24763e-19	1200	1108	1320	1111	1274	943	2849	5455	6200	0h>48h
Cdh11	337.008	2.82983	0.302327	9.36014	7.96286e-21	3.33221e-19	411	429	409	649	587	642	103	79	55	48h>0h
Vcam1	122.904	2.4059	0.257715	9.33549	1.00526e-20	4.19897e-19	109	130	130	209	227	224	41	35	37	48h>0h
Arhgef1	3706.54	-1.44829	0.155299	-9.32582	1.1013e-20	4.59167e-19	2834	2292	2347	1985	2513	1896	4054	5664	6269	0h>48h
H2afy2	1124.16	-1.85673	0.199382	-9.31245	1.24912e-20	5.19842e-19	565	565	642	507	554	496	1140	2008	2086	0h>48h
Vil1	107.567	-2.64541	0.284656	-9.29338	1.49471e-20	6.20906e-19	99	50	89	35	34	26	129	215	205	0h>48h
Pank1	244.802	-1.68778	0.181674	-9.29016	1.54058e-20	6.38791e-19	225	188	256	127	131	113	317	409	367	0h>48h
Aplp1	1261.16	-1.82828	0.197283	-9.26726	1.90993e-20	7.89056e-19	771	751	804	580	625	568	1314	2074	2446	0h>48h
Foxp4	1063.58	-2.24353	0.242091	-9.26731	1.90908e-20	7.89056e-19	713	564	537	360	459	373	1003	2132	2115	0h>48h
Jakmip1	1461.82	-1.50294	0.162391	-9.25505	2.14136e-20	8.83058e-19	1068	912	1122	776	989	690	1679	2221	2454	0h>48h
Zscan10	163.119	-2.24457	0.242656	-9.25001	2.24472e-20	9.24002e-19	135	101	85	59	76	48	226	248	314	0h>48h
Pdlim3	61.9339	4.15641	0.449861	9.23932	2.48072e-20	1.0193e-18	92	102	131	136	122	115	9	6	4	48h>0h
Akr1b8	502.689	-1.50001	0.162364	-9.23854	2.4988e-20	1.02487e-18	329	291	345	235	323	286	588	786	808	0h>48h
Ccdc3	75.5463	-2.95917	0.320621	-9.2295	2.71905e-20	1.11319e-18	20	11	16	15	18	22	124	130	135	0h>48h
Grhl1	377.522	-1.41821	0.154099	-9.20324	3.473e-20	1.4193e-18	294	310	288	199	251	210	469	589	549	0h>48h
Pkm	28675.6	-1.96067	0.213064	-9.20223	3.506e-20	1.43021e-18	15792	13876	19337	11942	14215	11465	29218	46322	59961	0h>48h
Dcbld1	313.582	-1.64835	0.179155	-9.20071	3.55579e-20	1.44792e-18	195	191	198	170	160	154	389	484	520	0h>48h
Serpina3g	142.517	2.66787	0.290407	9.18665	4.05261e-20	1.64726e-18	178	160	234	220	267	300	34	29	50	48h>0h
Spsb4	126.32	-2.60993	0.284334	-9.17912	4.34631e-20	1.76348e-18	31	33	42	31	54	30	206	195	229	0h>48h
Cmtm7	311.204	-2.01286	0.219364	-9.17587	4.47927e-20	1.81419e-18	134	133	167	122	132	141	347	516	612	0h>48h
Mylk	860.612	1.38016	0.150429	9.17484	4.52259e-20	1.82846e-18	964	849	932	1274	1480	1234	373	564	468	48h>0h
Sh3d19	1265.91	1.20135	0.131123	9.16195	5.09701e-20	2.05703e-18	1612	1496	1554	1745	2097	1816	689	815	733	48h>0h
Rcsd1	242.18	-2.85715	0.31235	-9.14726	5.83985e-20	2.35264e-18	105	57	118	54	64	70	222	530	525	0h>48h
Fgr	56.3242	-4.33318	0.474104	-9.13972	6.26166e-20	2.5181e-18	15	14	9	4	4	9	78	131	108	0h>48h
Krt18	115.828	-3.13677	0.343257	-9.13825	6.34717e-20	2.54797e-18	44	57	81	28	30	18	131	204	283	0h>48h
BC107364	69.3654	-3.49513	0.382538	-9.1367	6.43894e-20	2.58024e-18	10	11	9	17	10	9	92	137	147	0h>48h
Isg15	110.327	2.71801	0.297497	9.13624	6.46636e-20	2.58666e-18	208	194	261	220	218	175	19	40	27	48h>0h
Met	725.657	2.45658	0.268965	9.13346	6.63465e-20	2.6493e-18	736	718	685	1234	1333	1353	247	252	144	48h>0h
Abhd12b	65.8436	-6.11384	0.670296	-9.1211	7.43629e-20	2.96419e-18	3	4	2	2	2	2	120	158	100	0h>48h
Tpm2	283.407	2.39517	0.26268	9.11823	7.63598e-20	3.03845e-18	276	383	430	507	498	513	78	65	121	48h>0h
Mtap7d3	111.512	-4.1431	0.454552	-9.1147	7.88849e-20	3.13343e-18	1	7	6	11	11	16	283	154	156	0h>48h
Plekhh3	1896.32	-2.3079	0.253367	-9.10892	8.32048e-20	3.29925e-18	1203	1119	1192	651	803	595	1792	3406	4227	0h>48h
St3gal1	1165.51	-1.23467	0.135569	-9.10731	8.44515e-20	3.34284e-18	997	869	728	678	871	686	1300	1756	1749	0h>48h
Dock6	4320.99	-1.05403	0.115778	-9.10392	8.71262e-20	3.4427e-18	3383	3146	2654	2692	3403	2924	4800	6086	6206	0h>48h
Wt1	164.191	2.34204	0.257633	9.09061	9.84868e-20	3.88483e-18	185	217	259	262	349	272	40	46	73	48h>0h
Kank3	732.587	-1.52394	0.167751	-9.08458	1.04104e-19	4.09926e-18	738	539	734	384	445	383	792	1146	1270	0h>48h
Chrdl1	162.497	2.80385	0.309089	9.07136	1.17546e-19	4.62055e-18	235	278	264	290	265	347	42	49	27	48h>0h
Gad1	64.5281	-6.07254	0.669485	-9.07046	1.18515e-19	4.65059e-18	1	2	2	4	0	2	127	112	128	0h>48h
Sult5a1	185.651	-2.55935	0.282251	-9.06764	1.2162e-19	4.76418e-18	90	95	127	58	66	49	188	370	389	0h>48h
Sox3	2267.6	2.44217	0.269385	9.06574	1.23756e-19	4.8395e-18	3961	3408	3643	3575	5155	3635	446	607	1038	48h>0h
Spry1	693.454	-1.4045	0.154989	-9.06191	1.28181e-19	5.00392e-18	351	409	345	342	475	406	794	1117	1048	0h>48h
Limd2	1411.79	-2.18609	0.241358	-9.05748	1.33505e-19	5.20279e-18	987	833	1031	529	637	469	1348	2626	2936	0h>48h
Ptges	460.284	-1.62818	0.179849	-9.05304	1.3904e-19	5.40919e-18	274	298	322	207	275	241	514	730	807	0h>48h
Hoxc13	101.996	-2.35425	0.260372	-9.04189	1.53987e-19	5.98046e-18	35	26	33	38	40	29	136	183	182	0h>48h
Rnf213	632.232	1.77558	0.196388	9.04119	1.5498e-19	6.00873e-18	1191	996	1078	1047	1001	1068	270	322	239	48h>0h
Hmgcs1	4997.64	-1.49229	0.165093	-9.03904	1.58058e-19	6.11761e-18	2575	2416	2691	2484	3188	2745	7128	7867	6386	0h>48h
Bhlha9	54.1433	-3.82471	0.423189	-9.03781	1.59835e-19	6.17584e-18	11	4	3	7	11	5	85	96	115	0h>48h
Psors1c2	69.7301	-4.01572	0.444696	-9.03026	1.71267e-19	6.60632e-18	24	20	30	12	9	5	77	157	158	0h>48h
Jup	1004.61	-1.40993	0.156153	-9.02915	1.73006e-19	6.66205e-18	729	711	632	548	678	539	1103	1514	1682	0h>48h
Dchs1	330.825	1.53839	0.170404	9.0279	1.75005e-19	6.72761e-18	498	383	398	493	623	467	142	173	181	48h>0h
Tnfrsf25	130.531	-2.65043	0.293631	-9.02638	1.77451e-19	6.81009e-18	49	54	48	30	40	45	145	255	269	0h>48h
St8sia1	111.153	-7.88063	0.873324	-9.02372	1.8181e-19	6.96115e-18	5	2	1	2	0	1	205	252	187	0h>48h
Nmnat2	110.706	-2.65217	0.293914	-9.0236	1.82001e-19	6.96115e-18	36	41	36	40	33	24	171	218	168	0h>48h
Fbxl12	787.163	-1.79095	0.198602	-9.01776	1.91982e-19	7.33056e-18	577	457	485	359	419	354	815	1306	1500	0h>48h
Ptgir	81.7788	-3.58669	0.3986	-8.99823	2.29388e-19	8.7441e-18	19	12	9	14	10	16	87	190	174	0h>48h
Prkar2a	894.913	-1.43726	0.159771	-8.99573	2.34669e-19	8.93043e-18	709	612	640	475	636	444	1174	1381	1255	0h>48h
Sdc4	7749.71	-1.51993	0.169111	-8.98774	2.52365e-19	9.58776e-18	5506	4881	5736	3943	5211	3754	8223	12530	13205	0h>48h
Cald1	1166.39	2.90033	0.323119	8.97603	2.80724e-19	1.06473e-17	1369	1660	1707	2223	2011	2304	347	274	161	48h>0h
Fgfr1	4079.57	-1.2989	0.145171	-8.94738	3.64029e-19	1.37839e-17	2566	2380	2569	2241	2982	2363	4554	5837	6652	0h>48h
Evc2	497.743	-1.73031	0.193586	-8.9382	3.95572e-19	1.49533e-17	351	286	375	243	298	201	554	883	823	0h>48h
Htra1	283.099	2.46384	0.276074	8.92458	4.47379e-19	1.68835e-17	495	580	809	520	488	518	71	62	121	48h>0h
Acsbg1	614.742	-1.43048	0.160343	-8.92141	4.6038e-19	1.73453e-17	358	342	419	359	382	324	713	894	1025	0h>48h
Adamts1	182.175	2.34317	0.262857	8.91425	4.91124e-19	1.84729e-17	155	156	166	316	344	313	61	72	41	48h>0h
Nfkbil1	160.543	-2.85416	0.320231	-8.9128	4.97577e-19	1.86847e-17	51	33	58	45	56	25	182	307	349	0h>48h
Trpv4	499.243	-1.64406	0.184522	-8.90987	5.10915e-19	1.91538e-17	257	233	238	226	290	261	547	790	896	0h>48h
H2-Ab1	59.2807	-3.26692	0.36671	-8.90872	5.16239e-19	1.93215e-17	19	21	25	10	17	9	89	118	108	0h>48h
Zfp703	636.808	-1.89391	0.212723	-8.90318	5.42701e-19	2.02784e-17	483	518	418	264	326	277	640	1125	1218	0h>48h
Pld6	414.406	1.92414	0.216129	8.90271	5.44997e-19	2.03307e-17	680	686	709	675	828	607	117	173	221	48h>0h
Prss50	256.47	-1.94868	0.218907	-8.90186	5.49173e-19	2.04529e-17	158	110	163	112	120	106	279	436	491	0h>48h
Tpi1	3258.52	-1.99692	0.224464	-8.8964	5.76892e-19	2.145e-17	2353	2445	3414	1343	1419	1408	3316	5196	6966	0h>48h
Enc1	2111.09	-1.08784	0.122343	-8.89178	6.01372e-19	2.23236e-17	690	663	604	1315	1683	1344	2374	3005	3033	0h>48h
Spn	143.586	-3.35773	0.37775	-8.88877	6.17913e-19	2.29001e-17	48	54	63	35	33	14	152	293	336	0h>48h
Inafm2	807.25	-1.35064	0.15206	-8.8823	6.54931e-19	2.42324e-17	649	631	657	453	570	439	894	1225	1293	0h>48h
Ank3	516.098	-1.33319	0.150171	-8.87778	6.82103e-19	2.51967e-17	282	277	259	293	338	308	662	788	704	0h>48h
Fbln5	83.9688	2.72393	0.307033	8.8718	7.19702e-19	2.64993e-17	61	48	72	140	171	156	24	23	17	48h>0h
Scd3	148.433	-2.04775	0.230812	-8.87194	7.18821e-19	2.64993e-17	62	76	72	58	63	64	179	247	278	0h>48h
Foxj1	113.018	-2.99526	0.338001	-8.8617	7.88034e-19	2.89682e-17	50	34	69	29	32	20	116	241	243	0h>48h
Rsph3a	624.645	-1.54365	0.17422	-8.86038	7.97456e-19	2.92672e-17	318	361	416	322	333	363	734	923	1074	0h>48h
Cdan1	631.552	-1.2659	0.143025	-8.85088	8.68301e-19	3.18157e-17	353	339	316	364	459	369	711	960	949	0h>48h
Acat2	2755.45	-1.11375	0.125858	-8.84926	8.81048e-19	3.22307e-17	2170	1875	2276	1779	2066	1739	3114	3751	4173	0h>48h
Vdac1	1023.81	-1.16861	0.132324	-8.83144	1.03337e-18	3.7742e-17	714	781	992	637	726	656	1139	1463	1556	0h>48h
Uchl1	11507.5	1.11676	0.126471	8.83016	1.04523e-18	3.8114e-17	17690	15377	18330	14994	19597	16047	6138	7171	7931	48h>0h
Slc48a1	373.66	-1.88155	0.213305	-8.82091	1.13532e-18	4.13324e-17	151	180	125	142	188	182	398	659	685	0h>48h
Ly6h	117.901	-2.69454	0.305509	-8.81985	1.14614e-18	4.16596e-17	105	89	119	32	34	35	125	227	256	0h>48h
Fdft1	2926.65	-1.31748	0.149438	-8.81621	1.18402e-18	4.29675e-17	1711	1544	1911	1576	1966	1832	3288	4132	4848	0h>48h
Lrp11	556.971	-1.37406	0.155918	-8.81276	1.22104e-18	4.42401e-17	437	375	451	280	386	331	667	813	874	0h>48h
Cdk4	3865.34	-1.50804	0.171236	-8.80677	1.28803e-18	4.65928e-17	2924	2642	3404	1899	2572	2003	4124	5917	6846	0h>48h
Syde1	63.1639	3.22029	0.365785	8.80377	1.32293e-18	4.77793e-17	60	83	107	130	121	113	8	13	15	48h>0h
Midn	4445.36	-1.70163	0.193441	-8.79666	1.40946e-18	5.08235e-17	3378	2987	2841	1994	2739	2005	4620	7174	8348	0h>48h
Wnt3	210.785	-2.1085	0.239767	-8.79397	1.44369e-18	5.1975e-17	174	124	132	78	97	80	223	380	413	0h>48h
Lyve1	73.6187	-3.25037	0.369694	-8.79207	1.46825e-18	5.27757e-17	3	7	14	17	19	9	119	161	109	0h>48h
Slc16a13	222.109	-1.85796	0.211396	-8.78901	1.50881e-18	5.41475e-17	121	133	152	107	114	87	253	393	382	0h>48h
Fam163b	160.748	-1.81036	0.206212	-8.77911	1.64772e-18	5.90393e-17	260	196	254	77	78	73	211	274	247	0h>48h
Pgbd5	226.695	-2.01653	0.22997	-8.76868	1.80766e-18	6.4668e-17	232	207	215	90	103	95	239	418	422	0h>48h
Greb1l	208.96	2.23006	0.254385	8.76647	1.84357e-18	6.58489e-17	263	250	239	336	369	394	79	78	55	48h>0h
Eml2	319.25	-1.72022	0.196436	-8.75713	2.00292e-18	7.14282e-17	220	202	301	165	180	132	361	539	545	0h>48h
Def6	227.641	-2.56089	0.292511	-8.75484	2.04391e-18	7.27754e-17	97	126	113	66	81	65	223	406	533	0h>48h
Bahcc1	4686.98	1.58486	0.181184	8.74723	2.1866e-18	7.7734e-17	6627	5626	4708	6806	9608	6293	1696	2680	2547	48h>0h
Eno1b	5110.69	-1.56003	0.178699	-8.72996	2.54773e-18	9.04305e-17	3714	3478	4508	2587	2970	2731	6233	6661	9453	0h>48h
Gpr83	82.9037	-2.90155	0.33243	-8.72831	2.58506e-18	9.16121e-17	30	18	27	25	15	22	139	151	134	0h>48h
Serpine2	1934.74	1.35514	0.15545	8.71753	2.84339e-18	1.0061e-16	1807	1917	2058	2804	3082	3006	1000	985	1176	48h>0h
Tusc5	87.0352	-2.97132	0.340925	-8.71547	2.89566e-18	1.023e-16	26	28	34	23	21	19	94	188	178	0h>48h
Rasgrp4	103.641	-2.70076	0.310042	-8.71095	3.01339e-18	1.06294e-16	42	42	41	23	25	40	155	205	165	0h>48h
Ltb	69.6248	-3.4704	0.399267	-8.69192	3.56366e-18	1.25508e-16	8	6	27	7	13	17	84	139	156	0h>48h
Prelp	103.054	2.58361	0.297358	8.68853	3.67158e-18	1.29109e-16	83	74	68	165	203	197	34	28	23	48h>0h
Itga3	1663.33	-1.48225	0.170691	-8.68385	3.82587e-18	1.34326e-16	1436	1323	1367	879	1099	841	1797	2487	2941	0h>48h
Dlx3	1272.78	-1.57647	0.181632	-8.6795	3.97509e-18	1.39349e-16	1032	891	817	638	825	595	1332	2118	2191	0h>48h
Dennd3	543.111	-1.3086	0.15084	-8.67541	4.12077e-18	1.4413e-16	403	359	355	322	363	316	597	860	820	0h>48h
Snx25	1268.6	-1.13006	0.130262	-8.67531	4.12417e-18	1.4413e-16	1076	961	1079	757	970	828	1510	1737	1838	0h>48h
Fam214a	742.045	1.53533	0.177459	8.65175	5.07149e-18	1.76964e-16	1022	868	856	1100	1308	1129	372	410	322	48h>0h
Ror2	314.72	-1.6863	0.194926	-8.651	5.10491e-18	1.77856e-16	200	180	231	134	187	159	359	493	563	0h>48h
Arrb1	261.905	-1.95151	0.225711	-8.64603	5.33221e-18	1.8549e-16	152	140	111	130	120	94	299	447	483	0h>48h
Pld2	524.326	-1.27279	0.147349	-8.63792	5.72461e-18	1.98836e-16	374	364	348	333	349	300	631	789	749	0h>48h
Upb1	57.7305	-3.35402	0.388378	-8.63597	5.82303e-18	2.01945e-16	10	25	15	11	13	9	94	126	87	0h>48h
Cobl	137.501	2.50389	0.290043	8.63283	5.9853e-18	2.07256e-16	207	195	214	205	314	235	46	43	30	48h>0h
Slc38a3	232.116	-2.41566	0.279933	-8.62942	6.16632e-18	2.13199e-16	156	110	123	59	93	84	246	397	519	0h>48h
Extl1	304.777	-1.82465	0.211541	-8.6255	6.38152e-18	2.20303e-16	294	243	271	126	153	151	342	477	584	0h>48h
Rnf149	1516.67	-1.16483	0.135076	-8.62351	6.4935e-18	2.23828e-16	1100	890	1176	935	1177	896	1761	2108	2269	0h>48h
Emilin1	296.118	1.9491	0.226056	8.6222	6.56784e-18	2.26047e-16	598	586	669	521	582	408	83	128	149	48h>0h
Nphp1	651.79	1.18927	0.138224	8.60391	7.70484e-18	2.64778e-16	879	830	860	863	1101	946	330	425	409	48h>0h
Map2	174.918	3.30041	0.384454	8.58466	9.11034e-18	3.12605e-16	169	234	294	351	325	334	47	27	17	48h>0h
Grb10	1291.27	1.09429	0.127538	8.58013	9.47637e-18	3.24673e-16	983	1080	1196	1819	1959	1844	724	856	824	48h>0h
Msx2	181.937	-2.03058	0.236906	-8.57125	1.02367e-17	3.49665e-16	59	42	46	66	89	75	222	273	365	0h>48h
Arhgap33	612.33	-1.9696	0.22979	-8.57131	1.02313e-17	3.49665e-16	671	563	424	237	293	269	592	1212	1105	0h>48h
Arap3	936.554	-1.38609	0.162055	-8.55321	1.19711e-17	4.08295e-16	541	505	519	586	573	497	1031	1477	1481	0h>48h
Rspo4	453.24	1.36053	0.159132	8.54971	1.23397e-17	4.20234e-16	628	595	656	626	772	695	195	269	283	48h>0h
Tgfb3	96.6578	3.44717	0.403766	8.53753	1.37124e-17	4.66284e-16	69	81	120	179	221	168	25	10	11	48h>0h
Arhgap8	126.814	-2.12687	0.249555	-8.52267	1.55916e-17	5.29392e-16	98	58	87	48	60	44	147	227	236	0h>48h
Pomp	1821.82	-1.52358	0.178772	-8.52247	1.56187e-17	5.29517e-16	1296	1054	1492	917	1240	874	1925	2934	3131	0h>48h
H2afy	1587.75	-1.44292	0.169421	-8.51677	1.64059e-17	5.55138e-16	1268	1251	1354	879	1141	733	1914	2348	2539	0h>48h
Gm44	377.615	1.55197	0.182227	8.51665	1.64233e-17	5.55138e-16	531	478	560	638	618	542	163	219	180	48h>0h
Abca7	983.866	-1.36097	0.15991	-8.51085	1.72661e-17	5.82756e-16	1078	917	1014	557	703	514	1074	1505	1592	0h>48h
Icam1	822.8	-1.41988	0.167264	-8.48884	2.08703e-17	7.03356e-16	891	714	775	443	574	424	886	1290	1357	0h>48h
Sez6l	43.7899	-4.05271	0.477566	-8.48618	2.13546e-17	7.18609e-16	4	11	2	5	7	4	68	80	94	0h>48h
Adh1	65.807	4.11187	0.484857	8.48058	2.24075e-17	7.52926e-16	95	144	162	152	97	143	6	4	11	48h>0h
Rbm20	98.7318	-2.52077	0.29739	-8.4763	2.32466e-17	7.79964e-16	62	43	47	31	34	29	110	184	205	0h>48h
Nedd9	132.21	2.09997	0.247979	8.46834	2.48921e-17	8.33942e-16	207	256	314	204	229	252	38	60	49	48h>0h
Emb	787.93	-1.65482	0.195532	-8.46314	2.60274e-17	8.7069e-16	349	302	422	408	383	418	1199	1180	1077	0h>48h
Tmcc3	611.608	1.29243	0.152891	8.45328	2.83235e-17	9.46104e-16	874	757	890	858	1078	856	275	406	362	48h>0h
Ifit1	78.0358	2.86739	0.339289	8.45116	2.88419e-17	9.62003e-16	111	100	109	136	129	171	16	22	17	48h>0h
Adam12	193.022	1.82277	0.215768	8.44781	2.96823e-17	9.88581e-16	370	383	328	299	321	340	83	86	78	48h>0h
Gramd1a	582.556	-1.24681	0.147596	-8.44745	2.9773e-17	9.9015e-16	384	389	405	323	402	382	705	881	810	0h>48h
Mmrn2	45.5326	-3.6181	0.428964	-8.43451	3.32597e-17	1.10449e-15	10	12	9	7	8	7	64	93	91	0h>48h
Rbp1	220.982	1.77015	0.210045	8.42747	3.53208e-17	1.17121e-15	490	368	622	345	416	337	68	109	119	48h>0h
Trap1a	1048.9	-1.26202	0.149948	-8.41638	3.88287e-17	1.28565e-15	737	661	832	563	768	654	1167	1691	1495	0h>48h
Nanos2	55.5051	-3.44668	0.40958	-8.41515	3.92381e-17	1.29732e-15	20	13	14	12	13	5	81	122	96	0h>48h
Pald1	4071.67	-1.79414	0.213237	-8.41384	3.96813e-17	1.31006e-15	2454	2274	2585	1896	2245	1712	3968	6871	7959	0h>48h
Soga1	622.924	-1.66678	0.198183	-8.41029	4.09004e-17	1.34835e-15	421	399	358	278	419	268	692	1080	1026	0h>48h
Crtac1	249.67	-2.17197	0.258341	-8.40738	4.19286e-17	1.38024e-15	154	116	167	98	119	75	277	404	529	0h>48h
Ppp1r16b	583.445	-1.6032	0.190739	-8.40521	4.27109e-17	1.40192e-15	444	383	352	296	371	263	618	1030	950	0h>48h
Gpc6	147.5	2.19704	0.261389	8.40522	4.27051e-17	1.40192e-15	178	219	165	239	235	296	48	60	46	48h>0h
Lrp8	412.436	-1.48443	0.17679	-8.39658	4.59675e-17	1.50663e-15	396	320	352	255	233	205	498	650	633	0h>48h
Sox18	162.339	-2.4927	0.297034	-8.39195	4.78154e-17	1.56494e-15	93	50	68	45	56	56	193	236	385	0h>48h
Cgnl1	1568.13	-1.26817	0.151126	-8.3915	4.79975e-17	1.56863e-15	1085	888	1131	904	1142	911	1748	2638	2132	0h>48h
Fam19a3	44.4581	-3.88987	0.463699	-8.38878	4.91225e-17	1.60309e-15	14	12	10	7	6	5	60	93	93	0h>48h
Foxi3	240.703	-1.67682	0.199998	-8.38418	5.10822e-17	1.66465e-15	123	128	101	108	156	106	292	377	408	0h>48h
Jag1	1292.57	-1.25477	0.149754	-8.37887	5.34404e-17	1.739e-15	838	775	673	750	959	745	1709	1851	1732	0h>48h
Slc5a5	92.8185	-3.06717	0.366228	-8.37502	5.52141e-17	1.79158e-15	52	35	39	9	28	27	126	193	170	0h>48h
Peg13	194.553	-1.87694	0.22411	-8.37509	5.51822e-17	1.79158e-15	127	130	89	81	107	80	232	381	289	0h>48h
Pamr1	42.1579	-4.3069	0.514405	-8.37257	5.63739e-17	1.82659e-15	7	3	3	5	5	3	68	94	73	0h>48h
Matn4	298.862	-1.98717	0.237394	-8.37078	5.72359e-17	1.85188e-15	327	309	331	128	151	108	321	483	610	0h>48h
Zscan5b	260.568	-1.64049	0.196171	-8.36258	6.1361e-17	1.98252e-15	206	172	168	130	160	117	294	459	411	0h>48h
Pde9a	182.596	-2.294	0.27456	-8.35519	6.5329e-17	2.10772e-15	88	60	80	44	96	61	225	324	346	0h>48h
Phf2	279.672	-1.48472	0.177708	-8.35486	6.5511e-17	2.11059e-15	198	211	198	138	181	154	342	470	396	0h>48h
Phka1	780.826	1.2988	0.155602	8.34692	7.00676e-17	2.25419e-15	1025	910	1032	983	1378	1210	366	494	464	48h>0h
Mpzl1	2784.98	-1.14084	0.136776	-8.34096	7.36877e-17	2.3673e-15	2116	1922	2195	1669	2108	1803	2940	4049	4288	0h>48h
Marveld2	1491	-1.02928	0.123421	-8.33961	7.4536e-17	2.3895e-15	891	803	961	957	1122	1061	1647	2115	2103	0h>48h
Tcf15	2094.9	-2.18022	0.261432	-8.33953	7.45894e-17	2.3895e-15	1251	921	1265	808	1025	610	2119	3416	4674	0h>48h
Pcsk6	231.818	-1.66338	0.19951	-8.33732	7.59942e-17	2.43106e-15	117	97	106	109	135	113	298	324	408	0h>48h
Rnd3	91.5244	2.39553	0.287437	8.33412	7.80797e-17	2.49426e-15	131	136	174	153	159	178	28	26	31	48h>0h
Spred1	2449.68	-1.9051	0.228839	-8.32507	8.42781e-17	2.68848e-15	1107	1155	1220	1050	1226	1034	4123	4189	2817	0h>48h
Cryba4	46.915	-5.20843	0.625745	-8.32356	8.53571e-17	2.71908e-15	4	0	3	1	5	2	58	109	105	0h>48h
Lemd1	93.2697	-2.34323	0.281951	-8.31078	9.50773e-17	3.02447e-15	41	23	52	38	31	29	117	175	167	0h>48h
Slc30a10	321.284	-1.90219	0.229079	-8.30367	1.00941e-16	3.20649e-15	168	127	146	142	173	121	453	621	406	0h>48h
Maml3	257.856	-1.64404	0.198078	-8.29994	1.04166e-16	3.30432e-15	221	196	173	122	140	138	335	460	348	0h>48h
Six1	609.2	-1.61804	0.194994	-8.29791	1.05961e-16	3.35657e-15	242	260	293	292	386	286	650	947	1119	0h>48h
Nefl	76.1605	-2.84318	0.342902	-8.29154	1.11789e-16	3.53625e-15	25	38	17	12	24	24	103	165	126	0h>48h
Vwf	369.101	-1.55296	0.187343	-8.28941	1.13811e-16	3.5952e-15	395	325	284	159	222	221	484	540	582	0h>48h
Ntn1	1063.89	-1.42371	0.171874	-8.28346	1.19643e-16	3.77416e-15	789	689	719	566	734	559	1122	1635	1819	0h>48h
Fras1	505.929	1.56666	0.189245	8.27847	1.24763e-16	3.93021e-15	830	655	596	712	968	755	231	299	215	48h>0h
Ppp2r5a	1857.97	-1.08981	0.131683	-8.27601	1.27372e-16	4.00683e-15	1919	1918	2033	1154	1471	1192	2036	2586	2795	0h>48h
Gm21451	586.277	1.59969	0.193395	8.27162	1.3215e-16	4.15136e-15	757	731	969	1007	899	901	208	340	311	48h>0h
Plxnb2	1461.49	-1.1171	0.135072	-8.27035	1.33569e-16	4.19014e-15	1131	973	1040	981	1067	905	1656	1994	2208	0h>48h
Zfp385c	107.343	-2.21138	0.267446	-8.26853	1.35617e-16	4.24853e-15	79	59	47	35	52	36	127	204	191	0h>48h
Sox8	241.814	-2.08665	0.252531	-8.26293	1.42141e-16	4.44676e-15	153	151	152	67	118	112	290	394	470	0h>48h
Tex2	1592.89	-1.1488	0.139306	-8.24661	1.62951e-16	5.09075e-15	1214	1187	1287	985	1263	938	1751	2415	2283	0h>48h
Tsc22d1	3215.19	0.941555	0.114262	8.24031	1.71762e-16	5.35863e-15	3799	3507	3970	4061	5063	4445	1828	2337	2284	48h>0h
Snx21	350.436	-1.66876	0.202741	-8.23098	1.85687e-16	5.78513e-15	194	201	169	163	216	161	368	608	603	0h>48h
Klf11	2821.21	1.03099	0.125309	8.22758	1.9104e-16	5.94371e-15	3776	3438	3629	3691	4629	3846	1643	1988	1778	48h>0h
Slc24a4	46.9997	3.85496	0.469102	8.21774	2.07378e-16	6.44321e-15	72	56	70	82	108	93	2	7	9	48h>0h
Armcx2	1786.19	-1.27698	0.155629	-8.20527	2.30075e-16	7.13861e-15	1493	1339	1537	1016	1287	1050	1902	2579	2967	0h>48h
Smad9	125.024	2.25884	0.275379	8.20265	2.35141e-16	7.28582e-15	79	95	78	191	259	216	26	45	57	48h>0h
Gpr176	96.8908	2.25745	0.275315	8.19951	2.41366e-16	7.46851e-15	113	124	140	185	171	155	28	32	38	48h>0h
Slc6a2	53.3821	3.40436	0.415785	8.18778	2.66078e-16	8.22195e-15	66	65	76	92	124	98	7	6	14	48h>0h
Skap2	1414.64	1.07037	0.130782	8.18443	2.73592e-16	8.44264e-15	1853	1654	2107	1866	2319	1968	723	953	1004	48h>0h
Arhgap9	44.2332	-3.57978	0.43767	-8.17917	2.85816e-16	8.80788e-15	12	11	13	6	10	6	64	82	94	0h>48h
Tob1	615.451	-1.33794	0.163608	-8.1777	2.89302e-16	8.89112e-15	393	325	382	341	406	371	749	1034	799	0h>48h
5330417C22Rik	94.7598	2.71337	0.331795	8.17786	2.88927e-16	8.89112e-15	63	67	87	135	192	201	16	23	35	48h>0h
Klhdc2	2339.89	-1.30306	0.159402	-8.17467	2.96688e-16	9.1058e-15	1630	1335	1668	1301	1711	1330	2725	3117	3912	0h>48h
Gltp	963.722	-1.45764	0.178487	-8.16665	3.17076e-16	9.71838e-15	835	789	778	482	655	519	989	1585	1607	0h>48h
Ripk3	802.743	-1.63785	0.200635	-8.16335	3.25848e-16	9.97376e-15	430	413	478	426	451	373	864	1187	1537	0h>48h
Khnyn	579.837	-1.49497	0.183142	-8.16285	3.272e-16	1.00016e-14	484	465	436	316	407	256	680	938	897	0h>48h
Cass4	73.1317	-2.56613	0.314568	-8.15763	3.4167e-16	1.04299e-14	6	14	8	23	29	16	106	121	139	0h>48h
Itga11	93.0751	2.29541	0.281607	8.15113	3.60545e-16	1.09765e-14	114	116	103	172	172	150	27	27	38	48h>0h
A930011G23Rik	59.63	-3.02219	0.370763	-8.15128	3.60084e-16	1.09765e-14	16	18	30	12	17	13	91	89	130	0h>48h
Smarca2	1376.06	-1.3809	0.169509	-8.1465	3.74611e-16	1.13895e-14	1348	1123	1275	770	914	765	1791	2318	1690	0h>48h
Pcyox1l	751.887	-1.46573	0.179961	-8.14469	3.80264e-16	1.15459e-14	596	506	549	399	483	401	823	1074	1355	0h>48h
Vwa2	157.368	-1.84305	0.226521	-8.13634	4.074e-16	1.23533e-14	100	78	77	84	74	61	207	258	255	0h>48h
Casz1	2469.43	-1.34213	0.165339	-8.11742	4.76206e-16	1.44203e-14	1745	1558	1457	1320	1882	1307	2689	3764	3977	0h>48h
Nek3	468.183	1.36355	0.167982	8.11724	4.76912e-16	1.44225e-14	513	446	584	634	885	655	206	285	279	48h>0h
Il1rl1	66.9059	-3.08983	0.380854	-8.1129	4.94277e-16	1.49277e-14	12	19	31	17	17	11	126	127	92	0h>48h
Ets2	400.306	-1.20964	0.149303	-8.10193	5.4095e-16	1.62939e-14	350	322	321	247	280	247	476	569	589	0h>48h
Cdk6	1165.19	1.3545	0.167181	8.10201	5.40606e-16	1.62939e-14	1374	1178	1209	1676	1983	1711	636	698	566	48h>0h
Serpina3a	82.5636	9.76733	1.20636	8.09651	5.65587e-16	1.70134e-14	2	0	1	154	198	178	0	0	0	48h>0h
Slc25a5	2001.92	-1.55871	0.192816	-8.08389	6.27331e-16	1.88457e-14	1248	1094	1512	1031	1182	1038	1988	3163	3712	0h>48h
Snap91	542.565	-1.55624	0.192583	-8.08091	6.42855e-16	1.92865e-14	263	237	252	265	303	312	806	822	714	0h>48h
Tbc1d30	89.7853	-2.25243	0.278742	-8.0807	6.43968e-16	1.92944e-14	31	31	45	31	38	31	120	181	135	0h>48h
D16Ertd472e	664.797	1.26264	0.15626	8.08042	6.45445e-16	1.93131e-14	780	669	785	886	1154	975	346	438	358	48h>0h
Ehd2	608.457	1.46167	0.181004	8.07534	6.72886e-16	2.01077e-14	676	698	710	880	956	1014	280	292	374	48h>0h
Il1r2	65.4669	-2.9463	0.364881	-8.07468	6.76521e-16	2.01897e-14	15	24	27	11	15	22	110	105	121	0h>48h
Pfkfb3	480.688	-1.23388	0.15284	-8.07304	6.85679e-16	2.04361e-14	350	458	520	277	358	287	536	749	697	0h>48h
Tmem30b	136.691	-2.8805	0.357293	-8.06202	7.50438e-16	2.23369e-14	62	81	67	16	38	51	203	237	264	0h>48h
Fads2	1918.79	-1.15017	0.142697	-8.06024	7.61466e-16	2.26354e-14	1480	1288	1499	1192	1368	1257	2038	2706	3037	0h>48h
Pygo1	397.948	1.33917	0.166246	8.05535	7.9249e-16	2.35268e-14	427	322	447	530	660	638	190	251	219	48h>0h
Tgfb1i1	109.719	2.8501	0.353937	8.05255	8.10864e-16	2.40408e-14	137	168	115	183	232	204	16	19	44	48h>0h
Sh3glb2	1615.9	-1.34124	0.166739	-8.04394	8.69944e-16	2.57588e-14	1266	1117	1238	914	1160	868	1698	2423	2715	0h>48h
Vldlr	257.016	-1.76677	0.219647	-8.04367	8.71858e-16	2.57818e-14	234	284	324	107	137	130	407	370	369	0h>48h
Lpcat1	1379.36	-1.24214	0.154457	-8.04199	8.83881e-16	2.61033e-14	755	687	800	794	945	887	1470	1981	2257	0h>48h
Col18a1	1904.51	-1.81737	0.226003	-8.04135	8.88523e-16	2.62062e-14	1356	1121	1547	872	1046	787	1787	3369	3688	0h>48h
Grik3	2334.46	-1.24568	0.155038	-8.03469	9.38177e-16	2.75989e-14	1465	1250	1215	1335	1789	1336	2449	3743	3494	0h>48h
Pgk1	3013.97	-1.34757	0.167716	-8.03483	9.37124e-16	2.75989e-14	2223	2542	3598	1788	1861	1783	3078	4613	5097	0h>48h
Lipa	522.385	-1.4017	0.174474	-8.03383	9.44732e-16	2.77558e-14	494	470	474	307	314	295	719	698	781	0h>48h
Fam84b	97.8908	-2.61493	0.32626	-8.01487	1.10257e-15	3.2351e-14	56	63	77	34	22	31	162	190	136	0h>48h
Zdhhc14	428.643	-1.53734	0.192152	-8.00065	1.23767e-15	3.62681e-14	271	274	254	212	253	239	452	668	764	0h>48h
Upf3b	285.954	-2.88818	0.361145	-7.99729	1.27185e-15	3.72216e-14	70	74	97	72	71	74	519	679	259	0h>48h
Efnb2	416.946	-1.2805	0.160446	-7.9809	1.45265e-15	4.24582e-14	257	232	290	260	278	240	529	632	561	0h>48h
Pou3f1	3094.97	-2.20308	0.276061	-7.98043	1.4582e-15	4.25656e-14	2447	2055	2431	1042	1448	1070	2833	4991	7367	0h>48h
Trim58	46.1034	5.73118	0.718227	7.97962	1.46784e-15	4.27918e-14	135	83	106	91	113	87	1	3	1	48h>0h
Ctgf	486.743	2.28265	0.286291	7.97321	1.54609e-15	4.50152e-14	664	710	652	779	913	891	202	113	157	48h>0h
Prelid2	130.326	-2.27859	0.285868	-7.97076	1.57704e-15	4.58575e-14	67	72	97	60	37	44	193	206	230	0h>48h
Zmiz1	3522.34	-1.26299	0.15855	-7.96586	1.64074e-15	4.76487e-14	3131	2828	2028	1955	2744	1983	3768	5728	5159	0h>48h
Emp1	459.727	1.33652	0.167968	7.95696	1.76314e-15	5.11378e-14	534	661	764	643	704	756	216	289	259	48h>0h
Hcn4	101.043	2.19908	0.276428	7.95536	1.78612e-15	5.1738e-14	531	409	406	181	214	139	29	39	38	48h>0h
Rgp1	814.479	-1.17324	0.147539	-7.95207	1.83424e-15	5.30644e-14	608	574	545	517	624	467	894	1240	1182	0h>48h
Lrp2	104.922	2.59698	0.326786	7.94703	1.91035e-15	5.51956e-14	89	76	60	192	221	165	27	42	18	48h>0h
Crybg3	653.363	2.28808	0.288066	7.9429	1.97511e-15	5.69942e-14	734	787	750	1084	1167	1211	256	243	137	48h>0h
Fn1	13030.8	0.930367	0.117232	7.93614	2.08569e-15	6.01088e-14	13266	13021	10255	17009	20895	16982	7963	8998	9186	48h>0h
Wdr91	978.872	1.20878	0.152334	7.93509	2.10336e-15	6.05411e-14	2317	2027	2085	1362	1679	1349	444	622	675	48h>0h
Mthfd1	2007.44	-1.2139	0.153014	-7.93326	2.13463e-15	6.13633e-14	1350	1230	1516	1133	1591	1175	2153	3049	3056	0h>48h
1300017J02Rik	132.936	-2.24519	0.283208	-7.9277	2.2325e-15	6.40953e-14	56	44	48	52	41	54	202	258	179	0h>48h
Kif13a	1010.98	-1.23127	0.155433	-7.92157	2.34527e-15	6.72479e-14	586	504	567	611	760	571	1078	1632	1468	0h>48h
Nr5a1	40.3231	4.65375	0.587546	7.92066	2.36246e-15	6.75903e-14	83	101	134	90	89	69	3	4	2	48h>0h
Sh3rf3	114.856	1.96181	0.247684	7.92063	2.36317e-15	6.75903e-14	151	156	141	201	216	169	35	54	49	48h>0h
Zhx2	79.6868	-2.17046	0.274211	-7.91527	2.46708e-15	7.04733e-14	31	25	48	27	35	31	104	142	137	0h>48h
Ccne1	873.117	-1.04407	0.132006	-7.90926	2.58922e-15	7.38694e-14	869	783	836	558	688	584	1009	1175	1252	0h>48h
Sephs1	793.543	-1.03579	0.131067	-7.90276	2.72789e-15	7.77279e-14	412	404	446	527	614	527	872	1109	1146	0h>48h
Cdh22	38.0443	-4.27162	0.541348	-7.8907	3.00493e-15	8.55143e-14	12	17	12	4	4	4	54	69	90	0h>48h
Tceb3	445.581	-1.21027	0.153614	-7.87866	3.30902e-15	9.40501e-14	233	202	272	257	326	280	553	613	648	0h>48h
Dkk3	452.271	1.23086	0.156385	7.8707	3.52663e-15	1.00109e-13	441	372	467	661	755	618	215	277	301	48h>0h
Magea8	597.405	-1.20114	0.152642	-7.869	3.57486e-15	1.01352e-13	538	459	601	341	468	357	697	918	824	0h>48h
Gm9581	229.175	2.94232	0.374013	7.86689	3.63578e-15	1.0295e-13	283	270	254	447	460	389	69	57	24	48h>0h
Serpinb6b	42.3022	4.16825	0.529909	7.86598	3.66233e-15	1.03573e-13	56	58	68	94	74	86	4	3	6	48h>0h
Inhbb	362.804	-1.70383	0.216972	-7.85273	4.07077e-15	1.1498e-13	223	207	223	196	182	166	378	601	665	0h>48h
Sfrp5	45.9063	-3.25889	0.415651	-7.84044	4.48958e-15	1.26652e-13	21	13	10	7	13	8	71	76	96	0h>48h
Hspb8	105.071	2.26141	0.288842	7.82924	4.90843e-15	1.38296e-13	135	114	207	202	179	172	37	29	39	48h>0h
H2-DMa	202.076	-1.80326	0.230519	-7.82261	5.17382e-15	1.45592e-13	81	87	121	83	99	106	247	290	385	0h>48h
Mvk	518.694	-1.53672	0.196457	-7.82218	5.19167e-15	1.45914e-13	383	288	368	272	317	264	539	789	953	0h>48h
Atp2a3	150.362	-1.71973	0.219893	-7.82079	5.24939e-15	1.47353e-13	106	106	98	76	89	60	196	249	230	0h>48h
Gp5	64.7256	-3.25787	0.417608	-7.80126	6.129e-15	1.71832e-13	20	18	24	14	10	15	66	132	152	0h>48h
Ccdc88b	72.8649	2.43389	0.312029	7.80019	6.18141e-15	1.73087e-13	289	234	255	128	158	110	16	24	27	48h>0h
Adcy1	415.729	1.25812	0.161346	7.79767	6.30611e-15	1.76361e-13	723	563	655	578	729	578	188	267	266	48h>0h
Ovol2	188.645	-1.93984	0.249004	-7.79041	6.67916e-15	1.86564e-13	125	105	112	78	89	83	195	316	377	0h>48h
Rab36	265.205	1.52874	0.196438	7.7823	7.12176e-15	1.98682e-13	378	335	353	388	461	413	125	158	115	48h>0h
Tfcp2l1	831.911	1.04433	0.134243	7.77941	7.28657e-15	2.0303e-13	1442	1327	1256	1097	1388	1116	443	577	573	48h>0h
Gm38246	269.4	-1.38786	0.178457	-7.77701	7.42608e-15	2.06664e-13	46	60	91	149	183	146	358	379	397	0h>48h
Col11a1	740.971	1.48368	0.190875	7.77308	7.65988e-15	2.12751e-13	692	554	589	1184	1240	1067	355	464	319	48h>0h
Lemd3	1202.73	-1.33728	0.172042	-7.77302	7.66358e-15	2.12751e-13	733	677	764	658	858	677	1636	1883	1486	0h>48h
Grhl3	567.052	-1.46285	0.188237	-7.77133	7.7667e-15	2.1535e-13	368	330	304	243	399	332	679	852	909	0h>48h
RP23-404J7.9	76.4312	-2.7059	0.348228	-7.77047	7.81974e-15	2.16556e-13	21	19	10	15	22	28	122	157	107	0h>48h
Lima1	1309.2	1.11619	0.143705	7.7672	8.02396e-15	2.21941e-13	1943	1649	1950	1828	2164	1758	662	968	798	48h>0h
Scarf2	138.489	1.90861	0.245748	7.76654	8.06572e-15	2.22824e-13	153	150	162	214	274	215	51	48	71	48h>0h
Usp44	246.519	-1.59719	0.205784	-7.76147	8.39487e-15	2.31635e-13	91	93	91	128	143	121	368	371	333	0h>48h
Agap2	350.59	-2.28198	0.294777	-7.74137	9.83536e-15	2.71052e-13	178	189	211	132	138	113	299	726	721	0h>48h
Srebf2	12840.1	-1.38124	0.17849	-7.73848	1.00614e-14	2.76944e-13	7507	6528	7267	6990	8817	7084	13466	18027	23248	0h>48h
Agpat4	312.106	-1.58113	0.204391	-7.73581	1.02749e-14	2.8248e-13	147	125	158	177	183	141	333	535	515	0h>48h
Slc6a1	125.766	-1.75366	0.226724	-7.73478	1.03581e-14	2.8442e-13	144	89	103	50	73	62	163	203	202	0h>48h
Tkt	1143.03	-1.39288	0.180092	-7.73428	1.03993e-14	2.85206e-13	868	854	1003	638	732	650	1127	1840	1938	0h>48h
Nxph3	299.326	-2.03633	0.263476	-7.72873	1.08621e-14	2.97541e-13	141	108	160	130	137	109	285	528	622	0h>48h
Wfdc2	53.0276	-3.9297	0.508607	-7.7264	1.10633e-14	3.02685e-13	21	22	21	7	8	6	47	137	116	0h>48h
Elf1	195.614	1.58331	0.204969	7.72462	1.12183e-14	3.06558e-13	273	214	244	306	319	312	80	117	90	48h>0h
Prex1	2522.73	-1.1096	0.143827	-7.71484	1.21138e-14	3.30629e-13	2742	2299	2401	1569	2042	1531	2669	3649	3823	0h>48h
Ephb6	346.875	1.61818	0.209902	7.70922	1.26586e-14	3.45083e-13	515	458	519	548	625	506	111	186	208	48h>0h
Ing2	657.701	-1.20648	0.156608	-7.70383	1.32047e-14	3.59538e-13	523	574	593	415	502	361	814	963	900	0h>48h
Iffo2	1077.84	-1.87494	0.243401	-7.7031	1.32807e-14	3.61175e-13	959	728	885	478	591	417	985	1988	2085	0h>48h
Fgf13	400.71	1.52201	0.197644	7.7008	1.35221e-14	3.67299e-13	541	542	484	527	733	652	143	234	235	48h>0h
Gjb3	91.5803	-2.50806	0.32573	-7.69982	1.36263e-14	3.69687e-13	51	41	51	31	23	33	109	153	198	0h>48h
Trim63	76.9525	-2.36583	0.307402	-7.69621	1.40158e-14	3.79799e-13	57	65	71	30	27	23	92	155	134	0h>48h
Appl2	1108.38	-1.02469	0.133292	-7.6876	1.4992e-14	4.05767e-13	852	900	859	737	842	760	1325	1593	1416	0h>48h
Cuedc1	788.699	-1.51573	0.197229	-7.68511	1.52869e-14	4.13255e-13	608	459	559	394	508	412	778	1280	1408	0h>48h
Map3k9	2423.31	1.27608	0.166095	7.68282	1.55621e-14	4.20195e-13	3392	2923	2889	3311	4562	3191	1047	1578	1553	48h>0h
Ctnna2	70.1282	2.32105	0.302182	7.68094	1.57928e-14	4.25917e-13	53	99	75	121	128	124	23	23	22	48h>0h
Coro1a	367.989	-2.3026	0.299812	-7.68015	1.58908e-14	4.2805e-13	234	221	264	121	147	130	312	686	838	0h>48h
Ubash3b	389.424	-1.50798	0.196519	-7.67346	1.67421e-14	4.50449e-13	411	299	294	193	216	238	504	519	657	0h>48h
Ccr7	46.0108	-3.79707	0.495089	-7.66948	1.72699e-14	4.63619e-13	10	8	10	2	10	8	64	79	110	0h>48h
Kcnh2	613.854	-1.54072	0.20089	-7.66946	1.72725e-14	4.63619e-13	741	699	716	317	423	273	670	933	1092	0h>48h
Dpysl5	1331.2	-1.43978	0.187902	-7.6624	1.82488e-14	4.89246e-13	1175	1128	994	701	941	669	1339	2175	2247	0h>48h
Ado	2150.89	-0.970835	0.126808	-7.65593	1.91922e-14	5.1393e-13	1923	1699	2093	1423	1753	1488	2449	2784	3087	0h>48h
Mmp23	42.0872	3.34428	0.436989	7.653	1.96349e-14	5.25165e-13	45	42	59	83	79	82	7	7	8	48h>0h
Scn2b	60.5559	-3.51332	0.459227	-7.65052	2.00175e-14	5.34766e-13	23	29	21	18	9	4	84	127	117	0h>48h
Os9	493.057	1.49533	0.195484	7.64937	2.01971e-14	5.3893e-13	679	626	712	752	898	689	173	310	282	48h>0h
Sod3	66.1255	2.34016	0.305985	7.64795	2.04205e-14	5.44251e-13	91	103	105	105	136	114	17	23	24	48h>0h
Dcaf8	2890.2	-1.11828	0.146256	-7.64607	2.07218e-14	5.51633e-13	2674	2268	2527	1815	2220	1818	2960	4165	4537	0h>48h
Mapt	252.053	-1.62257	0.212273	-7.6438	2.10897e-14	5.60768e-13	220	186	187	109	168	122	279	406	438	0h>48h
Npepl1	549.403	-1.76714	0.23131	-7.6397	2.17727e-14	5.78252e-13	503	501	464	234	324	246	523	968	1038	0h>48h
Slc39a13	807.004	-1.49523	0.195731	-7.63925	2.18494e-14	5.79611e-13	555	542	525	387	533	440	811	1281	1437	0h>48h
Amz2	626.66	-1.543	0.202108	-7.63451	2.2668e-14	6.00623e-13	335	342	384	318	325	377	938	886	871	0h>48h
Rhox10	325.406	1.33143	0.1745	7.62999	2.34776e-14	6.21347e-13	327	369	489	448	581	469	139	211	195	48h>0h
Lpar3	343.659	-1.35285	0.177381	-7.6268	2.40659e-14	6.36175e-13	122	154	136	191	255	177	396	515	539	0h>48h
Itga9	411.071	-1.50776	0.197803	-7.62253	2.48753e-14	6.56807e-13	394	377	418	234	214	233	497	566	718	0h>48h
Aldoc	1754.87	-1.67904	0.22036	-7.61956	2.54548e-14	6.71326e-13	1029	954	1189	860	958	856	1628	2961	3377	0h>48h
2310003H01Rik	834.874	1.13139	0.14851	7.61828	2.57078e-14	6.77212e-13	1165	994	1140	1143	1404	1135	415	523	598	48h>0h
Inpp4a	499.39	-1.16312	0.152712	-7.61643	2.60792e-14	6.86198e-13	377	325	359	308	363	317	623	740	649	0h>48h
Adora1	112.155	-2.03925	0.268181	-7.60402	2.87082e-14	7.54496e-13	67	70	60	49	54	38	125	202	207	0h>48h
Cd24a	121.717	1.85857	0.244559	7.59971	2.96805e-14	7.79147e-13	98	97	97	172	245	198	38	57	60	48h>0h
Fnip2	3523.39	1.25372	0.165047	7.59611	3.05161e-14	7.99233e-13	4392	4019	3816	4789	5959	5183	2013	2236	1789	48h>0h
Col22a1	638.193	1.34696	0.17732	7.59621	3.04923e-14	7.99233e-13	1106	924	981	946	1176	827	265	394	403	48h>0h
Mobp	45.2596	3.08597	0.406434	7.59281	3.13049e-14	8.18946e-13	6	21	18	72	96	92	7	10	11	48h>0h
Fam162a	1902.03	-1.17804	0.155205	-7.59017	3.19483e-14	8.34815e-13	1837	1661	2318	1188	1413	1141	2018	2628	3115	0h>48h
Stat3	4481.87	-0.852289	0.112327	-7.58756	3.25992e-14	8.50843e-13	5610	4998	5195	3078	3897	3286	4907	6019	5943	0h>48h
Fam65a	1390.08	-1.52489	0.201105	-7.58257	3.38774e-14	8.83189e-13	1280	1171	988	694	993	630	1467	2169	2461	0h>48h
Prrx2	928.181	-1.8628	0.245694	-7.58182	3.40743e-14	8.87302e-13	358	325	410	409	502	376	878	1493	1965	0h>48h
Polr3e	1662.5	1.11849	0.147527	7.58161	3.41305e-14	8.87746e-13	2065	1917	2089	2204	2762	2344	777	1131	1183	48h>0h
Gpd2	268.609	-1.49059	0.196832	-7.57294	3.64866e-14	9.4794e-13	103	128	116	147	151	152	373	426	352	0h>48h
Rab3a	502.949	-1.51148	0.199646	-7.57081	3.70894e-14	9.62501e-13	423	409	387	243	316	280	506	807	893	0h>48h
Cfap74	286.325	1.54346	0.203996	7.5661	3.84588e-14	9.96897e-13	443	367	416	439	443	477	130	171	126	48h>0h
Npffr1	232.02	1.59126	0.210365	7.5643	3.89973e-14	1.0097e-12	239	190	190	359	414	345	77	128	137	48h>0h
Fgf7	46.7911	4.08711	0.540925	7.55578	4.16365e-14	1.0768e-12	17	63	43	92	73	114	7	6	2	48h>0h
Atp13a2	3771.53	-1.39124	0.184135	-7.55554	4.17118e-14	1.07752e-12	3001	2398	2578	2058	2601	2034	3738	5740	6691	0h>48h
Sgpp2	663.356	-1.28371	0.169951	-7.55345	4.23874e-14	1.09373e-12	540	526	479	397	434	404	920	933	870	0h>48h
Dapk3	971.933	1.36598	0.180875	7.55207	4.28401e-14	1.10415e-12	1582	1404	1567	1365	1759	1380	426	498	671	48h>0h
Izumo1r	59.0005	-3.06537	0.406177	-7.54688	4.45794e-14	1.14768e-12	41	43	44	13	9	18	68	127	118	0h>48h
2810417H13Rik	1135.62	-1.2914	0.171141	-7.54584	4.49396e-14	1.15564e-12	904	868	1053	628	767	716	1493	1817	1382	0h>48h
Polr3a	2425.48	0.930383	0.123381	7.54073	4.6733e-14	1.2004e-12	2780	2545	2609	2983	3928	3314	1419	1726	1737	48h>0h
Adgrl3	236.081	-1.60021	0.212217	-7.54043	4.68411e-14	1.20181e-12	97	147	118	118	138	119	358	354	314	0h>48h
Tox2	159.097	-2.1359	0.283272	-7.54009	4.69638e-14	1.2036e-12	107	111	60	41	95	56	206	278	278	0h>48h
Asgr1	47.1327	-3.59009	0.476737	-7.53053	5.0533e-14	1.29361e-12	35	23	34	12	6	5	57	91	110	0h>48h
Mfap3l	81.9404	2.0413	0.271461	7.51969	5.49081e-14	1.40244e-12	89	76	108	136	149	137	25	37	32	48h>0h
Aard	69.6456	2.72862	0.362858	7.51981	5.48575e-14	1.40244e-12	101	84	174	116	163	112	12	28	14	48h>0h
Pdgfrl	64.7289	2.34915	0.312572	7.51553	5.66802e-14	1.44608e-12	84	82	83	100	128	119	19	20	23	48h>0h
Dzip1l	467.699	1.24885	0.166305	7.50938	5.9409e-14	1.51399e-12	548	489	528	652	861	608	232	285	294	48h>0h
Umodl1	34.0767	-4.10022	0.54622	-7.50654	6.07097e-14	1.54541e-12	27	7	8	6	4	2	56	68	64	0h>48h
Slc45a3	418.241	-1.49563	0.199268	-7.50563	6.11336e-14	1.55445e-12	296	254	309	212	254	236	427	651	749	0h>48h
Magea5	487.147	-1.11404	0.14851	-7.50144	6.31194e-14	1.60315e-12	368	315	420	306	356	324	587	719	639	0h>48h
Ankrd1	69.2783	2.73588	0.364804	7.49959	6.40169e-14	1.62412e-12	10	38	28	129	117	137	15	26	12	48h>0h
Asb4	57.7207	-3.43381	0.457954	-7.49815	6.47235e-14	1.64022e-12	10	11	10	7	7	17	115	96	92	0h>48h
Sptbn2	4886.75	-1.40339	0.187218	-7.49603	6.57777e-14	1.66507e-12	3732	3040	3305	2649	3526	2466	5001	7325	8638	0h>48h
Gm340	2878.13	1.12689	0.150352	7.49505	6.62744e-14	1.67577e-12	3375	3119	3161	3803	4705	4159	1428	2182	1707	48h>0h
Ebf2	104.085	-1.85438	0.247462	-7.49359	6.7015e-14	1.69073e-12	40	23	30	49	48	47	143	181	152	0h>48h
Coro2b	426.496	1.40442	0.187416	7.4936	6.70088e-14	1.69073e-12	686	613	544	559	715	711	169	261	260	48h>0h
Tnfrsf19	375.505	-1.20144	0.160413	-7.48966	6.90543e-14	1.74024e-12	259	212	283	241	276	213	458	545	525	0h>48h
Plcb2	215.423	-2.2071	0.294876	-7.48484	7.16363e-14	1.80331e-12	113	98	119	80	63	100	229	378	444	0h>48h
Tmem173	270.521	-1.76612	0.236093	-7.4806	7.39844e-14	1.86036e-12	154	163	184	107	167	123	286	432	520	0h>48h
Erap1	1012.27	2.0228	0.270702	7.4724	7.87453e-14	1.97788e-12	1493	1592	1730	1558	1758	1873	456	423	266	48h>0h
Syne3	150.831	-1.53281	0.205253	-7.46795	8.14562e-14	2.0437e-12	214	175	137	73	97	79	186	244	227	0h>48h
Abhd2	2357.41	-0.865819	0.115974	-7.46564	8.28956e-14	2.07752e-12	2186	2012	2069	1620	1960	1775	2556	3281	3075	0h>48h
Fzd10	490.039	-1.75182	0.234824	-7.46014	8.6432e-14	2.16376e-12	409	366	346	214	292	217	478	794	974	0h>48h
Slc4a4	183.813	2.09449	0.280839	7.45796	8.78734e-14	2.19742e-12	115	125	104	315	348	290	82	69	49	48h>0h
Tfr2	166.344	-1.774	0.237927	-7.45607	8.91401e-14	2.22664e-12	149	141	122	82	95	65	182	279	300	0h>48h
Tgfb2	56.8968	2.64807	0.355294	7.4532	9.11049e-14	2.27321e-12	54	66	79	106	119	90	12	21	13	48h>0h
Gnai1	309.119	1.47258	0.197687	7.44903	9.40313e-14	2.34365e-12	410	355	450	442	568	450	166	162	146	48h>0h
Slc27a2	128.253	2.23951	0.300731	7.44688	9.55766e-14	2.37955e-12	237	262	277	240	231	205	31	36	65	48h>0h
Cd2	54.9992	-3.18348	0.427654	-7.44404	9.76502e-14	2.42851e-12	20	10	9	8	12	15	60	103	132	0h>48h
Plxna3	739.091	0.995283	0.133754	7.44113	9.98314e-14	2.48004e-12	1070	966	858	1017	1122	1011	422	535	487	48h>0h
Mmp15	277.425	-1.65603	0.222707	-7.43592	1.03844e-13	2.57689e-12	270	165	200	141	143	143	286	441	520	0h>48h
Hsd3b1	50.578	9.06001	1.21846	7.4356	1.04095e-13	2.5803e-12	51	104	98	95	116	113	0	0	0	48h>0h
Tarsl2	231.517	-1.41638	0.190529	-7.43397	1.05382e-13	2.60852e-12	179	153	186	123	145	136	307	367	307	0h>48h
Col4a6	41.0343	4.14451	0.557516	7.43387	1.05463e-13	2.60852e-12	26	41	51	81	114	57	2	7	4	48h>0h
Ssh3	317.768	-1.52531	0.205216	-7.43272	1.06386e-13	2.62848e-12	331	333	341	153	213	162	328	522	546	0h>48h
Amotl2	824.003	1.15725	0.155716	7.4318	1.07133e-13	2.64405e-12	1082	945	967	1135	1373	1144	396	505	598	48h>0h
Bcor	882.016	-0.991072	0.133455	-7.42625	1.11719e-13	2.75423e-12	576	508	491	596	727	573	1010	1192	1227	0h>48h
Fads1	1701.08	-1.08512	0.146134	-7.42556	1.12306e-13	2.76571e-12	1601	1503	1582	1098	1318	1082	1753	2406	2649	0h>48h
Ncs1	750.26	-1.30487	0.17582	-7.42159	1.15722e-13	2.84673e-12	611	505	585	405	536	449	770	1124	1260	0h>48h
Psd2	236.16	-1.58372	0.213535	-7.41664	1.20127e-13	2.95189e-12	211	167	186	124	141	114	275	446	322	0h>48h
Abhd14a	305.944	-1.65549	0.223275	-7.4146	1.21992e-13	2.99449e-12	201	222	215	126	198	152	317	555	505	0h>48h
Nek7	284.669	1.80881	0.244008	7.41294	1.23529e-13	3.02894e-12	326	331	401	456	478	479	138	131	95	48h>0h
Ccdc162	53.5243	-3.0617	0.413128	-7.41102	1.25335e-13	3.0699e-12	8	12	19	14	18	5	76	103	102	0h>48h
Pam	808.407	1.07335	0.144865	7.40929	1.26977e-13	3.1034e-12	706	683	834	1072	1294	1147	486	513	515	48h>0h
Ttc28	387.065	-1.12777	0.152209	-7.40938	1.26889e-13	3.1034e-12	226	241	198	233	285	261	456	544	552	0h>48h
Scamp5	1370.87	-1.61121	0.217506	-7.40765	1.28561e-13	3.13874e-12	1071	1004	1192	629	856	691	1277	2361	2512	0h>48h
Fbxo9	1242.7	-1.08678	0.146726	-7.40683	1.29353e-13	3.15468e-12	1059	980	998	703	1004	853	1474	1759	1701	0h>48h
C230014O12Rik	84.871	-3.43677	0.464423	-7.40008	1.36098e-13	3.31562e-12	49	41	60	26	7	12	98	189	175	0h>48h
Phf21a	1278.76	-1.04381	0.141273	-7.38865	1.48323e-13	3.60957e-12	868	937	910	817	965	894	1398	1998	1659	0h>48h
Rasd2	1928.2	1.23261	0.166865	7.38688	1.50316e-13	3.65413e-12	2937	2704	2722	2622	3607	2497	910	1141	1329	48h>0h
Plce1	79.2861	2.79547	0.378906	7.37774	1.61001e-13	3.9097e-12	88	92	91	131	181	135	14	33	12	48h>0h
Elfn2	64.5817	-2.40822	0.326671	-7.37202	1.68059e-13	4.07673e-12	19	30	25	18	29	19	96	98	123	0h>48h
Dgkg	33.5738	-3.96916	0.538536	-7.37028	1.70265e-13	4.12584e-12	3	2	2	3	6	4	44	75	68	0h>48h
Ctnnb1	13143.9	-0.845168	0.114803	-7.36189	1.81323e-13	4.38485e-12	11225	10150	11469	9187	11176	9787	14364	16817	18184	0h>48h
Irak2	144.109	1.72533	0.23436	7.36188	1.81341e-13	4.38485e-12	319	291	283	216	273	222	57	83	56	48h>0h
Uhrf1	14171.9	-1.18752	0.161431	-7.35622	1.89198e-13	4.56996e-12	12320	10592	11930	8477	11352	8040	14992	20105	22875	0h>48h
Helz	3184.85	-1.08671	0.147915	-7.34686	2.02917e-13	4.89612e-12	2556	2302	1933	1991	2636	1939	3513	5014	4186	0h>48h
Pgam1	13026.3	-1.09885	0.149648	-7.34288	2.09039e-13	5.03848e-12	11171	10726	12165	8297	10134	8195	13548	17744	20967	0h>48h
Ccnd3	2512.73	-1.25365	0.170743	-7.34232	2.09925e-13	5.05447e-12	2227	2093	2254	1519	1786	1459	2482	3778	4211	0h>48h
2610318N02Rik	502.09	-1.21837	0.165988	-7.34012	2.13402e-13	5.13274e-12	524	388	519	305	367	297	547	700	817	0h>48h
A2m	157.349	-1.69969	0.231636	-7.33777	2.17185e-13	5.21818e-12	76	155	129	62	81	94	207	248	248	0h>48h
Car6	102.385	-2.44813	0.333716	-7.33596	2.20134e-13	5.28345e-12	72	72	65	20	38	44	119	214	180	0h>48h
Vsx2	34.7189	-4.7451	0.647232	-7.33138	2.27796e-13	5.46157e-12	5	5	2	5	3	0	47	75	76	0h>48h
Erich2	70.2634	-2.14636	0.29316	-7.32146	2.45287e-13	5.87472e-12	31	41	44	24	31	28	104	124	106	0h>48h
Vgll3	115.788	3.57682	0.488761	7.31813	2.51443e-13	6.01581e-12	109	184	133	224	206	248	30	14	6	48h>0h
Zmat3	588.585	-1.22027	0.166804	-7.31562	2.56187e-13	6.12284e-12	291	311	297	332	396	403	752	884	762	0h>48h
Txndc12	699.7	-1.20094	0.16426	-7.31123	2.64701e-13	6.31968e-12	449	411	552	413	521	428	919	895	1016	0h>48h
Slc16a6	299.659	-1.31129	0.17939	-7.3097	2.67743e-13	6.38557e-12	284	235	276	194	198	159	343	475	436	0h>48h
Arid3b	1895.44	-0.936321	0.128129	-7.30763	2.71893e-13	6.47773e-12	1468	1419	1371	1219	1629	1336	2075	2570	2645	0h>48h
Adamtsl1	37.7354	4.15094	0.568797	7.29774	2.92633e-13	6.96455e-12	44	34	30	63	86	81	0	6	6	48h>0h
Tnfrsf1a	539.644	-1.10271	0.151197	-7.29319	3.02709e-13	7.19681e-12	376	394	414	338	426	338	579	778	807	0h>48h
Hn1l	3348.67	-0.865591	0.118802	-7.28602	3.19234e-13	7.58173e-12	3506	3161	3739	2314	2824	2474	3611	4351	4694	0h>48h
Grm5	35.9894	4.85371	0.666247	7.28515	3.21305e-13	7.62293e-12	28	26	28	81	69	71	3	4	0	48h>0h
Mmp25	40.3545	-3.16402	0.434927	-7.27484	3.46823e-13	8.21973e-12	16	13	11	10	11	5	68	73	70	0h>48h
Mei1	549.07	1.06109	0.145889	7.27324	3.50976e-13	8.30948e-12	786	633	656	755	839	781	302	396	343	48h>0h
Lrp1	5404.65	-1.06845	0.146926	-7.27204	3.54111e-13	8.37496e-12	3958	3648	3145	3505	4481	3247	5618	7879	8045	0h>48h
Hap1	2117.17	-1.32525	0.182252	-7.27155	3.55395e-13	8.39464e-12	2376	2152	2271	1242	1502	1137	2114	3164	3673	0h>48h
Ank	414.218	-1.42252	0.195631	-7.27144	3.55683e-13	8.39464e-12	225	224	237	183	287	255	466	635	674	0h>48h
Lhfpl2	634.958	-1.05953	0.145769	-7.26858	3.63282e-13	8.56507e-12	231	254	245	423	446	446	747	918	841	0h>48h
Tmem119	83.45	2.37811	0.327311	7.26558	3.71431e-13	8.74812e-12	124	111	149	144	187	121	15	36	29	48h>0h
Hemt1	61.302	-2.63677	0.36303	-7.26323	3.7796e-13	8.89265e-12	60	58	75	16	27	12	85	99	126	0h>48h
Wls	233.366	1.81794	0.250528	7.25644	3.97419e-13	9.34079e-12	217	247	299	362	393	405	116	84	96	48h>0h
Cldn11	42.2214	3.86441	0.532699	7.25439	4.03464e-13	9.47305e-12	48	57	83	109	70	71	3	8	5	48h>0h
Zfp57	374.077	-1.19535	0.16479	-7.25378	4.05287e-13	9.50601e-12	269	259	337	237	245	244	469	545	503	0h>48h
Slc43a2	548.496	-1.32064	0.182131	-7.25106	4.13507e-13	9.6888e-12	349	333	345	317	372	317	548	851	918	0h>48h
Foxl1	38.0971	-5.90054	0.813887	-7.24982	4.17313e-13	9.76788e-12	1	1	0	1	0	3	54	73	94	0h>48h
Phgdh	5279.8	-1.52876	0.210908	-7.24849	4.21457e-13	9.85471e-12	4824	3933	4901	2723	3225	2767	4989	8127	10182	0h>48h
Ccsap	121.815	-2.0618	0.284681	-7.24252	4.40437e-13	1.02879e-11	65	58	69	51	66	35	138	236	208	0h>48h
Gm2061	152.087	-1.95539	0.27011	-7.23924	4.51215e-13	1.05288e-11	62	49	50	58	85	58	230	286	187	0h>48h
Kif21a	376.384	-2.03441	0.281054	-7.23851	4.53649e-13	1.05639e-11	160	135	207	159	182	133	607	748	397	0h>48h
Myl9	300.593	2.51448	0.347373	7.23858	4.53416e-13	1.05639e-11	305	335	466	600	489	536	38	134	98	48h>0h
Lmod1	38.92	3.56545	0.49318	7.22951	4.84735e-13	1.12762e-11	47	42	46	66	79	85	2	9	7	48h>0h
Kcng3	358.795	1.34546	0.186153	7.22768	4.91318e-13	1.14176e-11	336	281	250	551	534	556	172	236	185	48h>0h
Rims1	336.879	2.02553	0.280473	7.22182	5.12977e-13	1.19087e-11	380	373	345	565	584	578	106	195	90	48h>0h
Blvrb	120.724	2.44695	0.338943	7.21935	5.22368e-13	1.21143e-11	511	341	519	212	237	205	21	30	60	48h>0h
Slc16a3	1438.14	-2.09648	0.290453	-7.21799	5.27634e-13	1.2224e-11	1226	1271	1850	608	616	519	1151	2748	3107	0h>48h
Stk24	3119.69	-1.00254	0.138926	-7.21641	5.33778e-13	1.23537e-11	1918	1870	1915	2080	2595	2002	3435	4073	4680	0h>48h
Arhgef5	367.182	-1.44775	0.200772	-7.21094	5.55673e-13	1.28473e-11	167	160	175	243	209	176	447	598	529	0h>48h
Rpl39	1858.16	-2.20149	0.305326	-7.21031	5.58239e-13	1.28935e-11	730	637	1003	641	715	764	1427	4217	3562	0h>48h
Shisa2	1123.27	-1.23131	0.17119	-7.19267	6.35375e-13	1.46602e-11	857	716	861	611	827	719	1191	1567	1880	0h>48h
Lmo1	146.227	2.0086	0.279264	7.19247	6.363e-13	1.46666e-11	215	172	187	214	277	261	38	52	82	48h>0h
Manba	304.237	-1.25013	0.173904	-7.18864	6.54393e-13	1.50683e-11	222	207	238	179	230	170	384	450	415	0h>48h
Ppic	762.805	-0.979146	0.136216	-7.18818	6.56618e-13	1.51042e-11	433	414	452	512	594	539	799	1104	1071	0h>48h
Fign	162.596	-2.04646	0.285342	-7.17196	7.39302e-13	1.6989e-11	61	39	25	77	68	57	280	270	203	0h>48h
Btbd17	46.1303	-6.61759	0.923683	-7.16435	7.81545e-13	1.79415e-11	8	5	14	0	2	1	59	83	129	0h>48h
Hmgcl	486.326	-1.75148	0.244539	-7.16236	7.92984e-13	1.81857e-11	355	221	360	248	282	186	472	821	937	0h>48h
Cfap126	38.0238	-3.34189	0.46683	-7.15868	8.14553e-13	1.86615e-11	11	11	9	4	9	9	48	78	79	0h>48h
Ube2r2	1155.22	1.03486	0.144635	7.15498	8.36858e-13	1.91532e-11	1241	1212	1334	1521	1799	1655	573	807	851	48h>0h
Man2a2	594.112	1.04254	0.145792	7.15088	8.62241e-13	1.97142e-11	743	727	741	823	957	785	341	423	370	48h>0h
Gadd45b	276.067	1.57358	0.220158	7.14748	8.83842e-13	2.01877e-11	604	465	695	404	571	361	99	158	153	48h>0h
Ripk1	134.582	1.95116	0.273222	7.14131	9.24472e-13	2.10945e-11	145	160	177	225	200	254	46	69	47	48h>0h
Zp3	77.4599	-2.34563	0.328466	-7.14116	9.25468e-13	2.1096e-11	59	56	49	28	33	21	82	150	153	0h>48h
Hexb	254.665	-1.81662	0.254582	-7.13569	9.63015e-13	2.19299e-11	93	102	138	78	146	139	372	372	408	0h>48h
Foxs1	37.3349	3.7875	0.530924	7.13379	9.76431e-13	2.22131e-11	40	63	55	77	86	61	1	6	8	48h>0h
Sik1	3214.63	-1.33717	0.187481	-7.13227	9.87284e-13	2.24375e-11	3027	2757	3006	1663	2506	1723	3298	4911	5399	0h>48h
Gm17055	42.3484	-3.56308	0.499644	-7.13123	9.94794e-13	2.25855e-11	16	14	25	11	5	5	51	105	76	0h>48h
Ptprn2	52.2236	-2.85341	0.400431	-7.12584	1.03448e-12	2.34631e-11	15	11	17	15	19	7	68	111	92	0h>48h
Atp2b4	1508.86	-1.01618	0.1427	-7.12104	1.07112e-12	2.42666e-11	1144	977	981	992	1210	1002	1884	2096	1889	0h>48h
Gm29096	30.8959	-4.40014	0.617916	-7.12093	1.07205e-12	2.42666e-11	1	2	3	3	5	1	57	53	61	0h>48h
Rnf122	365.032	-1.55807	0.218814	-7.12051	1.07529e-12	2.43156e-11	200	214	225	160	244	193	376	572	665	0h>48h
Mt2	4436.75	-1.5245	0.214182	-7.11777	1.09685e-12	2.47785e-11	1199	1632	1846	2011	2822	2526	4452	8814	6285	0h>48h
Klhl22	579.945	-1.1071	0.155577	-7.11607	1.11048e-12	2.50615e-11	416	330	404	375	460	347	615	858	857	0h>48h
Nsdhl	617.435	-1.22504	0.172224	-7.11306	1.135e-12	2.55893e-11	418	400	435	383	479	329	660	956	931	0h>48h
Ptprcap	45.2063	-3.02226	0.425087	-7.10976	1.16248e-12	2.61829e-11	7	9	10	6	14	12	57	81	100	0h>48h
Jdp2	142.623	-1.89612	0.266933	-7.10335	1.2177e-12	2.73994e-11	82	83	113	60	63	70	154	223	288	0h>48h
Dlk1	1664.12	1.335	0.18799	7.10144	1.2346e-12	2.77523e-11	1125	1130	1183	2305	3007	2355	741	842	1190	48h>0h
1700025G04Rik	599.334	-1.14171	0.160886	-7.09637	1.28081e-12	2.87624e-11	486	458	593	401	448	350	630	933	866	0h>48h
Ankmy2	368.588	-1.29974	0.183302	-7.09067	1.33469e-12	2.99427e-11	336	298	387	202	262	220	440	481	612	0h>48h
Igfbp3	754.601	1.1757	0.165842	7.08928	1.34814e-12	3.02146e-11	868	895	931	993	1243	1119	428	415	503	48h>0h
Arx	34.085	4.40621	0.62156	7.08896	1.35124e-12	3.02542e-11	50	54	57	85	58	63	2	3	4	48h>0h
P4ha3	95.3734	2.83849	0.400992	7.07867	1.45541e-12	3.25545e-11	78	93	100	165	186	183	35	15	16	48h>0h
Fkbp9	3687	0.947051	0.13397	7.06911	1.55933e-12	3.48445e-11	3649	3321	3729	4901	5678	4980	1931	2629	2850	48h>0h
Slc39a3	353.613	1.52161	0.215349	7.06579	1.59707e-12	3.56526e-11	425	441	388	496	683	512	121	194	226	48h>0h
Rrm2	1999.38	-1.03625	0.146698	-7.06379	1.62017e-12	3.61327e-11	1593	1511	1494	1145	1642	1430	2230	2921	2725	0h>48h
Klk13	34.3399	-3.87481	0.548783	-7.06073	1.65633e-12	3.69031e-11	17	11	14	2	4	8	58	56	73	0h>48h
Hoxc8	36.2193	3.84005	0.544034	7.05848	1.68339e-12	3.74337e-11	58	45	47	76	70	70	2	9	3	48h>0h
Lpin1	2378.03	-1.01477	0.143766	-7.05847	1.68345e-12	3.74337e-11	2112	2004	1963	1415	2048	1611	2805	3285	3192	0h>48h
Gdpd5	199.749	-1.72416	0.244388	-7.05498	1.72619e-12	3.8309e-11	152	81	121	91	120	88	198	343	370	0h>48h
Maf	38.301	3.21109	0.455146	7.05509	1.72486e-12	3.8309e-11	40	64	61	64	90	69	5	11	6	48h>0h
Tpm1	2096.61	0.937833	0.132971	7.05289	1.75238e-12	3.88521e-11	1838	1970	2383	2889	3151	2777	1175	1650	1394	48h>0h
Spryd4	158.67	-1.56455	0.22186	-7.05198	1.76388e-12	3.90688e-11	83	80	107	82	93	82	179	235	284	0h>48h
AI854517	73.2479	2.27234	0.322387	7.0485	1.80857e-12	4.00197e-11	80	74	90	116	172	105	18	26	30	48h>0h
Rhob	955.261	1.00798	0.143074	7.04515	1.85261e-12	4.09543e-11	1124	1089	1308	1273	1536	1285	551	601	700	48h>0h
Rabepk	482.958	-1.47899	0.210005	-7.04265	1.88617e-12	4.16556e-11	319	248	337	217	321	283	485	788	833	0h>48h
Cotl1	1067.46	-1.6296	0.231397	-7.04245	1.88885e-12	4.16741e-11	783	627	757	489	668	522	1020	1627	2147	0h>48h
Cmip	2639.39	-0.988707	0.140431	-7.0405	1.91552e-12	4.22215e-11	1925	1748	1629	1679	2249	1764	2915	3442	3918	0h>48h
P4ha2	1388.92	-1.05167	0.149454	-7.03672	1.96814e-12	4.33391e-11	1314	1198	1516	933	1104	865	1470	1882	2153	0h>48h
Pik3ap1	327.414	1.1087	0.157649	7.03269	2.02584e-12	4.45666e-11	337	225	287	449	527	458	176	227	204	48h>0h
Dtx4	195.659	1.59157	0.226366	7.03096	2.05123e-12	4.50813e-11	495	378	384	285	356	303	66	98	124	48h>0h
Slc16a2	84.2393	2.06925	0.294377	7.02923	2.07673e-12	4.55975e-11	94	140	114	119	172	147	26	28	41	48h>0h
Crygs	41.941	-5.70831	0.812349	-7.02692	2.11146e-12	4.63154e-11	12	11	16	1	0	4	37	97	114	0h>48h
Espn	436.6	-1.6407	0.233518	-7.02601	2.12521e-12	4.65719e-11	394	383	431	209	275	199	416	718	832	0h>48h
Gm2606	6824.41	-1.20408	0.171444	-7.02316	2.16905e-12	4.74867e-11	5433	5332	6764	3825	4662	4737	7429	9064	11465	0h>48h
Zfyve19	497.944	1.124	0.160049	7.02282	2.17427e-12	4.7555e-11	566	542	602	691	831	670	245	368	308	48h>0h
Tubb6	1816.26	-1.50453	0.21443	-7.0164	2.27657e-12	4.97445e-11	1447	1243	1753	1001	1061	965	1712	2800	3467	0h>48h
Map4k4	7730.94	-0.905791	0.129124	-7.01491	2.3009e-12	5.02278e-11	5210	4546	5281	5418	6658	5211	7845	11066	10741	0h>48h
Ehmt2	14167.4	1.52122	0.217005	7.01006	2.38218e-12	5.19521e-11	19990	16876	19739	20612	26208	20731	4529	7808	9446	48h>0h
Lrp10	2597.97	-1.29678	0.185046	-7.00787	2.4198e-12	5.27219e-11	1817	1674	1689	1411	1928	1501	2554	3886	4488	0h>48h
Fhod3	95.2133	-1.95648	0.279347	-7.00377	2.49171e-12	5.42365e-11	100	87	97	44	37	43	148	141	149	0h>48h
Pou5f1	1095.47	-1.62137	0.231577	-7.0014	2.53423e-12	5.51092e-11	926	815	1030	553	643	528	990	1809	2129	0h>48h
Kalrn	911.064	-1.05622	0.150923	-6.99843	2.58848e-12	5.62351e-11	602	528	603	588	766	551	1008	1376	1225	0h>48h
H19	3022.34	-1.64326	0.234954	-6.99396	2.67235e-12	5.80014e-11	2858	2806	3713	1555	1758	1388	2645	5349	5682	0h>48h
Gm6665	37.6392	4.54785	0.650399	6.9924	2.7022e-12	5.85933e-11	17	28	19	49	70	111	3	3	3	48h>0h
Tekt1	96.9844	-2.12755	0.304491	-6.98721	2.80404e-12	6.07434e-11	65	49	67	26	42	48	114	166	186	0h>48h
Zdhhc23	335.591	1.49672	0.214227	6.98663	2.81575e-12	6.09389e-11	468	397	391	508	576	503	161	215	136	48h>0h
U2af1	2038.75	-1.02619	0.146913	-6.98501	2.84827e-12	6.15839e-11	1668	1631	1907	1292	1690	1337	2048	3036	2978	0h>48h
Pphln1	3049.83	-1.30605	0.187071	-6.98156	2.91924e-12	6.30584e-11	2071	2040	2326	1693	2067	1871	4481	4367	3677	0h>48h
Cd248	188.276	1.58426	0.226965	6.98019	2.94776e-12	6.36138e-11	264	229	249	292	352	264	65	96	117	48h>0h
Sash1	593.363	1.3923	0.199559	6.97693	3.01709e-12	6.50482e-11	486	454	399	876	1009	868	323	367	259	48h>0h
Pnpla6	1167.38	-1.26421	0.181305	-6.97284	3.10609e-12	6.69033e-11	936	864	958	661	876	672	1174	1702	1994	0h>48h
Tmem88	124.375	-1.86649	0.267842	-6.96864	3.20023e-12	6.88658e-11	59	70	64	50	66	56	153	170	250	0h>48h
Muc2	129.766	-1.77962	0.255606	-6.96235	3.34642e-12	7.19433e-11	80	109	153	45	71	72	181	220	185	0h>48h
Hsd17b10	631.493	-1.37012	0.196827	-6.96106	3.37719e-12	7.25361e-11	468	349	503	341	383	402	686	861	1133	0h>48h
Unc45b	39.86	-3.32407	0.477629	-6.95953	3.41402e-12	7.32577e-11	6	14	10	6	6	11	78	63	67	0h>48h
Fgl1	103.27	-1.92467	0.276936	-6.94985	3.65677e-12	7.83924e-11	51	36	47	48	49	41	108	190	187	0h>48h
Wwc1	1501.16	-1.12269	0.16163	-6.94604	3.75673e-12	8.04592e-11	1092	813	991	972	1234	837	1607	2188	2254	0h>48h
Gm27239	33.7976	-4.24139	0.610647	-6.94573	3.76513e-12	8.05632e-11	0	0	1	3	6	2	36	69	87	0h>48h
Ramp2	165.439	-1.58351	0.228123	-6.94147	3.88035e-12	8.29502e-11	42	69	49	80	101	85	176	258	299	0h>48h
Rassf2	103.465	-1.64145	0.236494	-6.94075	3.9001e-12	8.3294e-11	74	76	81	53	60	48	134	158	166	0h>48h
Lss	1827.12	-1.03205	0.148706	-6.94022	3.91483e-12	8.353e-11	1131	927	1066	1216	1404	1226	1796	2707	2740	0h>48h
Fam196a	54.9403	2.45527	0.35385	6.93874	3.95623e-12	8.43339e-11	141	127	158	102	108	87	19	15	15	48h>0h
Wnk2	294.66	-1.50272	0.216698	-6.93465	4.07229e-12	8.67264e-11	322	280	195	163	211	122	338	490	454	0h>48h
Klhdc8a	245.328	-1.89716	0.273609	-6.93386	4.09517e-12	8.71319e-11	133	124	192	77	144	115	253	405	490	0h>48h
Cpn1	33.0193	-3.50673	0.505921	-6.93137	4.16775e-12	8.851e-11	17	9	13	8	4	5	44	66	69	0h>48h
Ctbp2	958.669	-1.14528	0.165231	-6.93143	4.16597e-12	8.851e-11	730	616	753	626	649	631	1254	1397	1182	0h>48h
Atoh8	360.351	1.70974	0.246857	6.92604	4.32796e-12	9.18265e-11	511	464	564	513	625	630	104	170	227	48h>0h
Cdr2l	1197.81	-1.1999	0.173355	-6.92165	4.46419e-12	9.46283e-11	1121	1017	1107	732	937	670	1213	1786	1928	0h>48h
Tiam1	1763.49	-0.852064	0.123107	-6.9213	4.47506e-12	9.47702e-11	1499	1216	1213	1248	1561	1231	1953	2342	2337	0h>48h
C1ra	59.0417	2.32703	0.336368	6.91811	4.57709e-12	9.68404e-11	74	81	128	90	122	105	12	22	24	48h>0h
Slc26a10	99.6126	-2.4486	0.354078	-6.91542	4.66494e-12	9.86071e-11	17	35	27	22	45	33	95	215	194	0h>48h
Grem1	174.824	2.5672	0.371359	6.91299	4.74554e-12	1.00217e-10	52	49	54	282	261	404	67	39	37	48h>0h
Usp12	2417.65	-0.809179	0.117064	-6.91229	4.76877e-12	1.00614e-10	2240	2108	2259	1717	2110	1810	2705	3138	3139	0h>48h
Rfx8	38.7977	-3.5856	0.519054	-6.90795	4.91715e-12	1.03649e-10	5	6	6	10	5	4	44	77	92	0h>48h
Cacna1g	313.317	-1.40175	0.20306	-6.90315	5.08634e-12	1.07115e-10	256	203	186	185	206	161	315	534	497	0h>48h
Tcf21	34.8783	8.52267	1.23487	6.9017	5.13849e-12	1.08113e-10	50	30	54	79	71	72	0	0	0	48h>0h
Fam171b	575.19	2.00615	0.290695	6.90124	5.15518e-12	1.08364e-10	638	659	634	905	980	1054	254	266	139	48h>0h
Pla2g4a	111.414	2.06619	0.299495	6.89891	5.24039e-12	1.10053e-10	174	199	184	185	189	199	47	48	29	48h>0h
Adcy10	207.114	1.46047	0.211707	6.89855	5.25356e-12	1.10228e-10	244	220	203	326	332	312	100	129	93	48h>0h
Tfap4	1103.61	-1.46065	0.211741	-6.89827	5.26398e-12	1.10344e-10	914	918	984	546	768	582	1029	1933	1854	0h>48h
Kif3a	1681.26	1.13545	0.164753	6.89183	5.50782e-12	1.15339e-10	1758	1560	1874	2262	2898	2270	884	1268	930	48h>0h
Sspo	46.3247	-2.44936	0.355406	-6.89171	5.51244e-12	1.15339e-10	41	38	34	14	17	15	62	82	86	0h>48h
Synrg	649.283	0.983183	0.142667	6.89144	5.5232e-12	1.15458e-10	663	560	589	856	993	912	391	465	416	48h>0h
Ankrd34a	75.9113	-2.88499	0.418713	-6.89014	5.57377e-12	1.16408e-10	21	20	20	9	30	20	83	136	179	0h>48h
Cd68	203.131	-1.51785	0.220371	-6.88771	5.66991e-12	1.18307e-10	110	84	153	91	111	134	250	330	302	0h>48h
Afap1l1	1227.96	-1.13133	0.164538	-6.87581	6.16368e-12	1.28491e-10	757	698	725	737	946	790	1318	1615	2020	0h>48h
Mdfic	70.2142	2.09747	0.305214	6.87212	6.32531e-12	1.31739e-10	87	123	146	112	117	134	21	31	26	48h>0h
Chd7	1694.06	-1.34826	0.196263	-6.86967	6.43496e-12	1.339e-10	1160	1041	962	985	1199	887	2102	3032	1984	0h>48h
Elf3	63.8806	-2.31087	0.336687	-6.86356	6.7167e-12	1.39635e-10	54	63	82	19	28	22	80	97	136	0h>48h
Apold1	35.4841	-4.07487	0.594462	-6.85471	7.14555e-12	1.48414e-10	2	9	3	1	9	3	51	89	58	0h>48h
Sfrp2	1154.28	-0.992278	0.144783	-6.85353	7.20489e-12	1.4951e-10	451	444	504	791	915	770	1210	1541	1761	0h>48h
D330045A20Rik	765.399	2.20971	0.322514	6.85152	7.30678e-12	1.51485e-10	590	651	752	1255	1268	1484	335	282	157	48h>0h
Rgl2	870.965	-1.4404	0.210401	-6.84599	7.59491e-12	1.57315e-10	783	616	718	467	561	477	796	1519	1474	0h>48h
Slc8a1	55.4337	2.53421	0.37022	6.84515	7.63949e-12	1.58094e-10	56	66	84	95	108	99	20	16	11	48h>0h
Arfgef2	2266.43	0.817281	0.119476	6.84055	7.88881e-12	1.63105e-10	2912	2612	2852	2946	3452	2876	1368	1666	1770	48h>0h
Mex3d	3384.33	1.39603	0.204141	6.83856	7.99927e-12	1.65238e-10	5640	4987	5613	4661	6139	4974	1298	1762	2448	48h>0h
Mpnd	449.304	-1.51922	0.222318	-6.83355	8.28364e-12	1.70957e-10	505	452	586	246	273	226	433	696	848	0h>48h
Irgm2	299.597	1.12874	0.165286	6.82899	8.55163e-12	1.76327e-10	580	423	485	414	473	430	148	198	206	48h>0h
Tnfrsf8	50.8228	-2.47921	0.363188	-6.82624	8.71714e-12	1.79576e-10	26	36	26	11	23	16	66	95	93	0h>48h
Gatsl3	365.202	-1.5621	0.228866	-6.82541	8.76747e-12	1.80286e-10	291	292	270	187	240	168	392	509	709	0h>48h
Ddx41	2839.37	1.22613	0.17964	6.82546	8.76428e-12	1.80286e-10	3352	2948	3575	3967	4739	4054	1185	1732	2111	48h>0h
Acap1	37.2153	-2.86267	0.419596	-6.82244	8.9507e-12	1.83887e-10	24	15	20	8	13	8	54	74	64	0h>48h
Serping1	317.839	1.81396	0.266017	6.81896	9.17041e-12	1.8823e-10	405	522	583	447	503	627	139	105	163	48h>0h
Pard3b	73.0137	2.10557	0.308888	6.81659	9.32252e-12	1.91179e-10	106	68	92	116	152	113	28	31	21	48h>0h
Fnbp1	1526.74	-0.914032	0.134127	-6.81466	9.44842e-12	1.93586e-10	1453	1297	1259	1040	1337	1028	1590	2173	2096	0h>48h
Itm2a	68.8352	2.04558	0.300315	6.81145	9.66226e-12	1.97789e-10	48	63	92	107	142	108	20	33	26	48h>0h
F630040K05Rik	36.6497	-3.50125	0.514248	-6.8085	9.86248e-12	2.01705e-10	6	8	30	3	5	11	48	76	75	0h>48h
Gm12537	6117.39	-1.17113	0.172051	-6.80689	9.97327e-12	2.03787e-10	4955	5102	6120	3483	4240	4320	6417	8318	10201	0h>48h
Megf6	982.353	-1.74431	0.256399	-6.80311	1.02386e-11	2.09021e-10	785	715	712	409	632	420	901	1610	1999	0h>48h
Gm22918	36.9132	8.60363	1.26678	6.79171	1.10812e-11	2.26018e-10	23	28	56	81	51	100	0	0	0	48h>0h
Gml	55.4147	-2.39878	0.353399	-6.78774	1.13901e-11	2.3211e-10	63	47	76	13	24	20	68	96	111	0h>48h
Ndor1	1354.69	0.918248	0.135323	6.78559	1.15617e-11	2.3535e-10	1605	1596	1549	1689	2172	1831	773	934	1039	48h>0h
Tjp2	2269.85	-0.949811	0.139977	-6.78548	1.15698e-11	2.3535e-10	1578	1363	1475	1540	1962	1479	2380	3074	3328	0h>48h
Pik3r6	69.4938	2.16962	0.319777	6.78479	1.16253e-11	2.36266e-10	121	104	160	110	140	116	14	31	30	48h>0h
Bicd1	109.744	2.5293	0.372891	6.78295	1.17745e-11	2.39084e-10	81	98	105	185	206	207	28	51	16	48h>0h
Nlrp12	29.0942	-3.62263	0.534139	-6.78219	1.18365e-11	2.40128e-10	2	2	2	3	5	6	48	60	49	0h>48h
App	1936.85	0.855759	0.126274	6.77701	1.22688e-11	2.48676e-10	1891	1744	2159	2522	2875	2593	1086	1451	1513	48h>0h
Sost	323.71	-6.1233	0.903627	-6.77635	1.2325e-11	2.49593e-10	16	16	16	2	25	4	405	669	823	0h>48h
Vangl2	853.106	-1.07282	0.158329	-6.77588	1.23653e-11	2.50184e-10	943	890	830	530	646	587	849	1262	1301	0h>48h
Rnf180	417.745	1.25742	0.185776	6.7685	1.30125e-11	2.63045e-10	501	401	442	515	740	640	226	227	264	48h>0h
Lrrc4	210.884	-1.24903	0.18463	-6.76505	1.33265e-11	2.69153e-10	110	127	155	131	145	124	251	292	325	0h>48h
Ptgfrn	2841.84	-1.07655	0.159231	-6.76094	1.37097e-11	2.76646e-10	2218	1893	2262	1777	2319	1786	2823	4094	4459	0h>48h
Rps6kb2	342.475	-1.3089	0.193617	-6.76023	1.37768e-11	2.77753e-10	189	216	197	210	246	177	357	574	510	0h>48h
St8sia6	100.7	-2.7663	0.409226	-6.75984	1.38148e-11	2.78271e-10	60	59	52	35	26	21	222	160	115	0h>48h
Pitpnm1	918.186	-1.07841	0.159567	-6.75835	1.39571e-11	2.80889e-10	863	764	789	597	729	570	929	1312	1432	0h>48h
Stk32b	42.9652	-2.89015	0.427746	-6.75671	1.41164e-11	2.83842e-10	18	13	5	6	16	11	76	70	73	0h>48h
Pcbd1	58.8488	-2.63183	0.389974	-6.74875	1.49122e-11	2.99579e-10	44	34	32	13	13	26	74	117	108	0h>48h
Homer2	1036.53	0.902341	0.133725	6.74775	1.50156e-11	3.01388e-10	1149	1007	1172	1305	1705	1334	613	772	729	48h>0h
Sort1	3308.74	-0.776097	0.115149	-6.73994	1.58451e-11	3.17756e-10	2360	2263	2272	2432	2894	2497	3428	4296	4519	0h>48h
BC034090	164.717	1.48246	0.22025	6.7308	1.68738e-11	3.38087e-10	201	219	164	255	277	245	61	90	105	48h>0h
Ptprg	1030.83	-0.86315	0.128281	-6.72861	1.71296e-11	3.42909e-10	1004	920	944	734	870	741	1161	1431	1293	0h>48h
Ascl2	379.751	1.15248	0.171329	6.72673	1.7352e-11	3.47054e-10	723	617	800	479	684	525	207	236	245	48h>0h
Clstn2	338.273	1.19531	0.177785	6.72337	1.77572e-11	3.54846e-10	345	324	340	459	542	508	153	245	208	48h>0h
Ndufa4l2	198.357	-2.19445	0.326422	-6.72275	1.78322e-11	3.56031e-10	74	201	188	80	74	73	160	415	404	0h>48h
Card6	225.967	-1.32709	0.19773	-6.71164	1.92456e-11	3.83913e-10	142	149	126	119	141	152	263	369	316	0h>48h
Slc6a6	1720.95	-0.88048	0.131376	-6.70196	2.05647e-11	4.09866e-10	1803	1606	1692	1217	1513	1164	1786	2433	2330	0h>48h
Tagln3	58.4224	-2.39407	0.357494	-6.69681	2.13019e-11	4.24187e-10	44	22	24	18	23	19	73	86	130	0h>48h
Slc35d3	61.024	-3.20514	0.478781	-6.69437	2.16606e-11	4.30951e-10	14	28	21	13	23	3	91	118	114	0h>48h
Rps6kl1	87.9468	1.80065	0.269003	6.6938	2.17451e-11	4.31875e-10	105	68	107	154	154	129	31	39	45	48h>0h
Htr1d	120.76	-1.76619	0.263853	-6.69385	2.17379e-11	4.31875e-10	81	42	51	67	67	42	144	197	208	0h>48h
Pnliprp2	52.4916	-2.54722	0.380865	-6.68797	2.2629e-11	4.48585e-10	24	13	18	19	17	13	79	72	110	0h>48h
Kif26b	206.677	1.4574	0.217912	6.68804	2.2618e-11	4.48585e-10	215	251	194	326	352	293	75	117	134	48h>0h
Sp9	34.7297	3.21319	0.480452	6.68786	2.26458e-11	4.48585e-10	27	18	29	69	64	67	3	8	9	48h>0h
Gale	973.232	-1.27627	0.190852	-6.68721	2.2746e-11	4.50175e-10	638	592	723	598	704	525	997	1360	1708	0h>48h
Myo1e	938.115	-1.14768	0.171718	-6.68356	2.33209e-11	4.61153e-10	478	425	556	562	747	569	1038	1214	1539	0h>48h
Fgf18	54.7006	-2.42229	0.362476	-6.68262	2.34704e-11	4.63704e-10	16	5	18	21	18	16	62	97	114	0h>48h
Zfp786	84.758	1.94216	0.290678	6.68149	2.3652e-11	4.66885e-10	107	103	73	142	164	126	25	32	46	48h>0h
Ier2	823.489	-1.24045	0.185909	-6.67238	2.51694e-11	4.96405e-10	640	616	795	445	633	500	818	1236	1367	0h>48h
Crybb3	36.1981	-2.99927	0.44955	-6.67171	2.52845e-11	4.98243e-10	7	25	19	8	13	5	57	71	60	0h>48h
Scarb2	301.983	-1.12402	0.168651	-6.66477	2.65088e-11	5.21916e-10	156	221	203	186	214	208	339	418	456	0h>48h
Plcl2	852.02	0.885901	0.13296	6.66292	2.68431e-11	5.28038e-10	1087	953	1087	1068	1275	1199	493	628	632	48h>0h
Muc3a	41.5368	-2.54791	0.3825	-6.6612	2.71592e-11	5.33794e-10	24	22	22	13	16	10	58	72	78	0h>48h
Prss8	88.8768	-1.96985	0.295767	-6.66016	2.73531e-11	5.3714e-10	56	71	76	38	42	36	90	169	162	0h>48h
Prkar1a	7170.76	-0.766255	0.115053	-6.66	2.73821e-11	5.37243e-10	5193	4649	5631	5124	6464	5463	7651	9134	9626	0h>48h
Tnfrsf26	84.3509	-1.95601	0.293707	-6.65972	2.74347e-11	5.37809e-10	22	18	41	31	44	36	132	113	143	0h>48h
Slx1b	218.731	1.43465	0.21544	6.65916	2.75401e-11	5.3941e-10	481	429	461	324	415	290	83	140	126	48h>0h
Vegfa	845.354	-0.900925	0.135458	-6.65095	2.91208e-11	5.69879e-10	1310	1422	1869	574	741	581	904	1186	1138	0h>48h
Scrn1	52.2582	2.57977	0.387982	6.64919	2.94714e-11	5.76242e-10	56	41	107	74	93	119	11	16	17	48h>0h
Plcxd1	98.6887	-2.00007	0.301021	-6.6443	3.04671e-11	5.95197e-10	78	58	41	29	48	50	108	188	172	0h>48h
B4galnt1	267.908	-1.43398	0.215826	-6.64416	3.04958e-11	5.95245e-10	153	158	163	128	203	137	299	392	460	0h>48h
Adamts17	248.41	-1.33522	0.201013	-6.64248	3.08446e-11	6.01535e-10	229	184	226	131	170	152	253	412	387	0h>48h
Zfp831	94.1769	-1.81654	0.273481	-6.6423	3.08819e-11	6.01747e-10	39	42	53	46	44	43	122	180	128	0h>48h
Gm766	26.7436	-4.34761	0.654617	-6.64146	3.10597e-11	6.0469e-10	5	8	1	1	2	5	44	58	47	0h>48h
Limk2	1704.95	-0.833314	0.125524	-6.63866	3.16551e-11	6.15754e-10	1463	1249	1325	1212	1530	1198	1808	2275	2315	0h>48h
Bckdhb	476.342	-1.14128	0.171997	-6.63549	3.23428e-11	6.28593e-10	373	323	350	319	351	282	586	603	720	0h>48h
Pianp	561.175	-1.73745	0.262202	-6.62636	3.44061e-11	6.6812e-10	461	513	351	202	368	269	523	1019	1032	0h>48h
C130074G19Rik	40.1758	-2.76666	0.417856	-6.62108	3.56596e-11	6.91869e-10	27	15	11	10	11	12	46	86	76	0h>48h
Ank2	95.5022	2.03253	0.307082	6.61886	3.61968e-11	7.01692e-10	86	108	89	166	153	169	37	46	26	48h>0h
Sel1l	2478.81	0.898721	0.135796	6.61816	3.63701e-11	7.04448e-10	3159	2748	2851	3078	4011	3283	1593	1765	1677	48h>0h
Chrnb4	53.2491	-2.26303	0.34205	-6.6161	3.68805e-11	7.13725e-10	40	36	18	21	23	15	65	97	98	0h>48h
Elovl6	647.392	-1.89262	0.286316	-6.61025	3.83678e-11	7.41876e-10	450	469	488	296	299	282	1089	1218	631	0h>48h
Ddr2	189.374	2.04605	0.309623	6.60821	3.88988e-11	7.51501e-10	194	240	204	308	300	361	89	72	50	48h>0h
Fahd1	160.603	-1.41463	0.214143	-6.606	3.94844e-11	7.62167e-10	113	106	135	99	106	76	191	257	237	0h>48h
Cmtm4	1986.82	-0.774067	0.117263	-6.60112	4.08076e-11	7.87039e-10	1789	1552	1586	1442	1755	1507	2088	2743	2514	0h>48h
Selplg	30.5978	-5.27004	0.798496	-6.59995	4.11288e-11	7.92559e-10	3	5	3	2	3	0	31	69	79	0h>48h
Adam11	321.753	-1.60624	0.24342	-6.59865	4.14922e-11	7.98884e-10	315	237	219	165	194	152	294	547	602	0h>48h
Drosha	6274.26	-0.814977	0.123658	-6.59056	4.38166e-11	8.42921e-10	5833	5462	5076	4363	5541	4701	6371	8338	8782	0h>48h
Gm12033	8860.56	-1.24253	0.18854	-6.59029	4.38968e-11	8.43748e-10	7246	7362	9051	5109	6134	5628	8390	12970	15548	0h>48h
Meox1	29.9942	-5.56558	0.844892	-6.58732	4.47831e-11	8.60055e-10	6	3	5	1	2	1	32	71	73	0h>48h
Slc7a5	12411.8	-1.02424	0.155517	-6.58603	4.51757e-11	8.66862e-10	9979	9043	9373	7911	10161	8227	13090	15908	19866	0h>48h
Ube2a	468.231	-1.03963	0.158056	-6.57762	4.78041e-11	9.16522e-10	187	235	234	312	345	323	584	615	632	0h>48h
Gpi1	14235	-1.07474	0.163448	-6.57545	4.85069e-11	9.2921e-10	13135	11191	14566	9166	10779	9432	13941	19662	23381	0h>48h
Krt8	46.5575	-2.52143	0.383522	-6.5744	4.8851e-11	9.35012e-10	30	35	47	19	13	12	61	80	92	0h>48h
Gng4	34.7327	2.9002	0.441582	6.56776	5.10787e-11	9.76826e-10	43	48	34	58	77	62	7	7	10	48h>0h
Ippk	1181.45	-0.96148	0.146397	-6.56761	5.11282e-11	9.76949e-10	788	680	780	802	927	839	1249	1529	1802	0h>48h
S1pr2	575.123	-1.06427	0.162088	-6.56602	5.1679e-11	9.86642e-10	460	417	469	370	410	410	586	839	867	0h>48h
Gm12671	8963.88	-1.20388	0.183427	-6.56324	5.26502e-11	1.00434e-09	7487	7233	8927	5083	6050	6228	9067	12366	15450	0h>48h
Ptch2	1025.02	-1.3469	0.205224	-6.56308	5.27064e-11	1.00457e-09	782	685	607	547	743	573	947	1727	1700	0h>48h
BC021891	52.2752	2.71603	0.413908	6.56193	5.31168e-11	1.01154e-09	105	84	165	91	86	111	14	8	18	48h>0h
Tnnt1	104.898	-1.66014	0.253138	-6.55823	5.44504e-11	1.03606e-09	80	67	111	50	61	51	113	174	184	0h>48h
Fst	311.831	-1.18388	0.1808	-6.54802	5.83066e-11	1.10851e-09	153	139	170	173	213	224	376	468	421	0h>48h
Zfp282	101.456	1.96777	0.300572	6.54674	5.88058e-11	1.11706e-09	120	170	132	162	203	155	27	36	59	48h>0h
Cacnb3	566.697	1.10877	0.169391	6.54565	5.92375e-11	1.12432e-09	779	684	885	779	954	755	265	372	421	48h>0h
Slc41a1	1733.47	-1.14123	0.174402	-6.54369	6.00201e-11	1.13822e-09	1375	1187	1270	1089	1422	974	1734	2742	2570	0h>48h
Pcbp3	690.416	-0.98598	0.150684	-6.54337	6.01477e-11	1.13969e-09	509	453	451	444	525	514	775	1035	876	0h>48h
Sox12	1971.19	1.35082	0.206554	6.53982	6.15937e-11	1.16555e-09	4440	3524	3621	2705	3691	2730	756	1097	1433	48h>0h
AU015836	134.119	1.82702	0.279371	6.53977	6.1615e-11	1.16555e-09	155	182	169	219	224	224	65	63	42	48h>0h
Magea2	331.3	-1.10487	0.168968	-6.53893	6.19624e-11	1.17114e-09	242	227	289	215	246	213	365	527	436	0h>48h
Cntfr	185.865	1.73318	0.265177	6.53594	6.32115e-11	1.19376e-09	327	287	300	297	399	228	59	89	106	48h>0h
Cep89	906.841	0.992906	0.15196	6.53401	6.4032e-11	1.20824e-09	1088	1004	1092	1295	1378	1190	457	652	677	48h>0h
Cbln2	28.6527	-5.16165	0.79027	-6.53151	6.51091e-11	1.22755e-09	5	0	3	3	2	0	36	80	50	0h>48h
Rps4x	2192.44	-1.09288	0.167348	-6.5306	6.55073e-11	1.23403e-09	1399	1508	2029	1353	1425	1682	2511	2966	3255	0h>48h
Nol6	3934.27	0.96553	0.147984	6.52456	6.82019e-11	1.28372e-09	4306	3868	3740	4862	6635	5255	2013	2853	2983	48h>0h
Stard10	284.285	-1.54112	0.236362	-6.52018	7.02224e-11	1.32066e-09	261	183	271	157	179	131	286	423	544	0h>48h
Sdpr	49.9677	2.95175	0.452804	6.51883	7.08591e-11	1.33153e-09	28	59	31	82	109	93	14	15	4	48h>0h
Lama2	79.0903	2.02077	0.310223	6.51392	7.32159e-11	1.37468e-09	114	109	128	124	149	133	36	24	30	48h>0h
Bin1	2244.64	-1.25523	0.192717	-6.51333	7.35046e-11	1.37896e-09	2116	1819	2222	1238	1732	1302	2119	3516	3747	0h>48h
Ttc34	192.439	1.49216	0.229109	6.5129	7.37116e-11	1.3817e-09	223	162	261	280	368	267	70	102	126	48h>0h
Spry2	555.016	-1.05511	0.162087	-6.50951	7.53965e-11	1.41211e-09	348	354	362	351	473	338	592	799	811	0h>48h
Itgb7	149.62	-1.50079	0.230743	-6.50416	7.81287e-11	1.46208e-09	101	104	128	74	86	90	174	211	264	0h>48h
D430019H16Rik	211.1	-1.25359	0.19274	-6.50404	7.81931e-11	1.46208e-09	194	176	183	115	149	136	276	304	285	0h>48h
Pdk4	52.8925	2.2838	0.351984	6.48837	8.67689e-11	1.62109e-09	29	38	35	85	90	105	13	22	18	48h>0h
H2-Oa	29.2784	-5.17957	0.798653	-6.48539	8.8503e-11	1.65213e-09	9	8	12	4	1	0	49	42	75	0h>48h
Srpx	41.0806	2.73812	0.422225	6.48497	8.87479e-11	1.65534e-09	38	42	49	65	94	71	12	7	12	48h>0h
Ppl	68.3746	2.0239	0.312321	6.4802	9.16028e-11	1.70718e-09	154	120	179	103	121	127	23	34	22	48h>0h
Ctsh	62.3753	2.34038	0.361768	6.46928	9.84678e-11	1.83362e-09	72	75	118	107	100	124	19	27	14	48h>0h
Pla2g4f	32.7443	-3.40821	0.526983	-6.4674	9.97006e-11	1.85505e-09	13	5	8	7	5	6	39	86	53	0h>48h
Psmb9	201.048	-1.94854	0.301403	-6.4649	1.01364e-10	1.88446e-09	169	129	188	67	137	66	219	337	390	0h>48h
Tmem158	847.879	-1.99026	0.307905	-6.4639	1.02038e-10	1.89544e-09	514	515	551	330	422	344	659	1433	1978	0h>48h
Slc16a11	384.271	-2.10401	0.325578	-6.46238	1.03068e-10	1.91143e-09	309	252	298	138	211	121	303	775	798	0h>48h
D430041D05Rik	251.024	1.35424	0.209557	6.4624	1.03052e-10	1.91143e-09	256	263	237	342	440	376	146	138	124	48h>0h
Epb4.1l4a	468.736	0.995959	0.154159	6.4606	1.04291e-10	1.93253e-09	392	362	368	585	778	644	280	318	315	48h>0h
Gm7336	10555	-1.19155	0.184531	-6.45716	1.06687e-10	1.97531e-09	9080	8659	10677	6034	7188	7345	10464	14748	18151	0h>48h
Rab30	126.475	1.52956	0.236893	6.45678	1.06952e-10	1.97861e-09	116	109	115	186	214	202	46	81	65	48h>0h
Gli1	90.2815	-1.77095	0.274331	-6.45551	1.07857e-10	1.99373e-09	36	26	33	38	55	39	99	156	158	0h>48h
Stra6	26.5709	4.0295	0.624361	6.45379	1.09085e-10	2.01478e-09	47	45	47	54	63	44	2	2	5	48h>0h
Col4a4	26.9745	3.73944	0.579788	6.44967	1.12096e-10	2.06872e-09	105	123	127	56	61	44	3	3	5	48h>0h
Scn4a	69.2516	-1.86385	0.289062	-6.44792	1.13394e-10	2.09098e-09	75	46	37	31	38	27	83	122	115	0h>48h
Lypla2	1290.26	-1.69847	0.263841	-6.43748	1.21475e-10	2.23816e-09	1122	896	1216	619	745	588	1065	2207	2634	0h>48h
Gm2574	2940.15	-1.25817	0.195533	-6.43455	1.23842e-10	2.27992e-09	2506	2431	2914	1559	1971	2022	3749	3474	4835	0h>48h
Ppp1r26	781.256	-1.12281	0.17453	-6.43335	1.24819e-10	2.29605e-09	867	690	789	503	592	483	748	1229	1192	0h>48h
Tdh	94.2149	1.72294	0.267849	6.4325	1.25525e-10	2.30715e-09	144	111	154	147	171	146	31	42	56	48h>0h
Zfp532	2511.71	-0.838148	0.130305	-6.43218	1.25784e-10	2.31004e-09	1756	1653	1693	1648	2243	1903	2784	3389	3239	0h>48h
Tagln2	2258.93	-1.1574	0.180112	-6.42599	1.31017e-10	2.40421e-09	1745	1733	2099	1356	1726	1412	2100	3666	3486	0h>48h
Hes1	981.878	-1.30754	0.203599	-6.42215	1.34361e-10	2.46358e-09	671	652	782	525	704	588	1063	1246	1804	0h>48h
Mxra8	200.027	1.28801	0.200597	6.4209	1.35467e-10	2.48184e-09	173	212	189	254	337	320	94	132	115	48h>0h
Anxa1	492.523	2.21066	0.344334	6.42009	1.36197e-10	2.49169e-09	307	446	476	835	812	930	240	136	116	48h>0h
Fam98c	140.385	-1.39107	0.216676	-6.42006	1.36224e-10	2.49169e-09	181	132	194	86	90	72	184	210	198	0h>48h
Usp3	2974.12	-0.952537	0.148412	-6.41821	1.37887e-10	2.52008e-09	2168	2181	2359	1824	2379	2296	3496	3806	4125	0h>48h
Acox1	993.268	0.846025	0.131876	6.41533	1.40521e-10	2.56615e-09	1270	1198	1219	1206	1570	1325	614	750	711	48h>0h
Sema3c	64.4498	3.28496	0.512096	6.41474	1.41063e-10	2.57397e-09	47	51	78	124	106	140	18	13	3	48h>0h
Arl6ip5	577.919	-1.03251	0.161046	-6.41127	1.44312e-10	2.63114e-09	346	384	420	367	463	389	587	809	890	0h>48h
Cygb	36.6609	3.20404	0.499815	6.41045	1.45095e-10	2.64117e-09	81	87	119	71	95	48	6	5	10	48h>0h
Slc7a2	1057.34	1.4603	0.227799	6.41051	1.45036e-10	2.64117e-09	1470	1413	1437	1427	1764	1775	564	654	414	48h>0h
Adgrg1	403.485	-1.04969	0.163779	-6.40921	1.46272e-10	2.66046e-09	345	308	417	240	325	280	425	593	582	0h>48h
Adam19	297.274	1.194	0.186311	6.40866	1.46803e-10	2.66798e-09	308	355	258	423	450	449	139	218	175	48h>0h
Hpn	85.4651	-2.1283	0.332297	-6.40482	1.50543e-10	2.73376e-09	81	68	89	27	35	40	85	150	179	0h>48h
Fam131c	85.9544	-2.25445	0.352297	-6.39928	1.56115e-10	2.83268e-09	95	100	133	33	29	33	81	149	194	0h>48h
Mcc	296.113	-1.615	0.252382	-6.39901	1.5639e-10	2.83539e-09	172	167	185	139	154	172	482	450	351	0h>48h
Clcn4-2	163.15	1.5289	0.239046	6.39585	1.59661e-10	2.89239e-09	214	207	245	217	313	251	66	108	73	48h>0h
Hcar1	35.7609	-3.45221	0.539863	-6.3946	1.60964e-10	2.91367e-09	10	14	13	8	5	6	69	41	78	0h>48h
Cnbp	11502	-0.744323	0.116428	-6.39299	1.62669e-10	2.94219e-09	10438	9026	10730	8434	10490	8688	12663	14350	15006	0h>48h
Agap1	4301.27	-1.00022	0.156476	-6.39213	1.6359e-10	2.95649e-09	3723	3160	3369	2844	3614	2763	4257	5966	6684	0h>48h
Tcf19	563.553	-1.2599	0.197136	-6.39103	1.64775e-10	2.97552e-09	545	446	644	319	417	332	541	853	961	0h>48h
Sat1	354.114	-1.06444	0.166573	-6.39024	1.65622e-10	2.98845e-09	218	223	218	215	300	223	398	516	490	0h>48h
Dap	358.388	1.11671	0.174763	6.38983	1.66069e-10	2.99413e-09	341	417	396	484	527	556	175	253	237	48h>0h
Gm2a	429.307	-0.956745	0.149747	-6.38906	1.66909e-10	3.00688e-09	343	381	538	291	334	310	454	599	610	0h>48h
Slc7a1	3310.1	-0.739708	0.115799	-6.38785	1.68231e-10	3.02829e-09	3496	2946	3288	2454	3026	2482	3388	4344	4406	0h>48h
Ptgs2	125.975	2.75575	0.431425	6.38756	1.68553e-10	3.03168e-09	159	225	280	231	227	241	35	48	11	48h>0h
Ppp1ca	7267.9	-1.33817	0.209522	-6.38676	1.69442e-10	3.04526e-09	5745	4394	6003	4216	5037	3974	6701	10760	13468	0h>48h
Aacs	1381.77	-1.16905	0.18306	-6.38619	1.70068e-10	3.05408e-09	1162	1004	1197	831	1095	813	1337	2035	2286	0h>48h
Srgap1	564.891	-0.921547	0.144478	-6.37846	1.78877e-10	3.20973e-09	354	320	342	403	476	374	607	768	792	0h>48h
Plekhh2	203.235	1.9137	0.300131	6.37621	1.81526e-10	3.25469e-09	144	165	137	294	360	373	101	87	56	48h>0h
Dkkl1	161.826	-1.56373	0.245386	-6.37254	1.85926e-10	3.33095e-09	154	153	148	82	91	89	157	277	284	0h>48h
Fam105a	247.893	-1.09509	0.171916	-6.36993	1.89114e-10	3.38539e-09	154	130	173	168	180	158	275	355	360	0h>48h
Morf4l2	3381.28	-0.769308	0.120774	-6.36981	1.89266e-10	3.38544e-09	2899	2841	3289	2503	2957	2557	3494	4808	4198	0h>48h
C230052I12Rik	191.771	1.46839	0.230602	6.36767	1.91926e-10	3.42762e-09	226	174	277	259	333	312	78	91	130	48h>0h
Gm10359	8026.5	-1.20929	0.189908	-6.36777	1.9179e-10	3.42762e-09	6940	6700	8121	4574	5410	5521	7928	11117	14063	0h>48h
Hcfc2	1148.95	1.24457	0.195459	6.36743	1.92218e-10	3.43013e-09	1470	1447	1456	1633	1982	1573	697	718	555	48h>0h
Sptlc2	2765.32	-0.791678	0.124342	-6.36691	1.9287e-10	3.43906e-09	2371	2167	2574	1934	2467	2102	3034	3471	3731	0h>48h
Gm4969	99.1544	2.00396	0.31476	6.36664	1.93215e-10	3.44251e-09	105	104	84	165	199	147	20	46	52	48h>0h
Ddr1	1288.2	-1.37788	0.216502	-6.36428	1.96203e-10	3.493e-09	683	631	745	777	861	658	1201	1953	2370	0h>48h
Hmox1	2168.83	-1.08566	0.170663	-6.36145	1.99858e-10	3.55527e-09	1724	1732	1854	1290	1768	1414	2076	3324	3322	0h>48h
Prrx1	255.867	2.06191	0.324292	6.35821	2.04123e-10	3.6283e-09	283	380	355	410	420	484	129	81	70	48h>0h
Sobp	72.5568	1.92578	0.302922	6.35735	2.05265e-10	3.64289e-09	108	126	116	110	155	106	22	30	37	48h>0h
Thbd	142.677	1.41981	0.22333	6.35746	2.05111e-10	3.64289e-09	139	207	173	219	254	194	60	77	91	48h>0h
Flnc	1795.28	-1.14856	0.180702	-6.35608	2.06962e-10	3.67014e-09	1153	1017	1155	1056	1400	1134	1729	2588	3001	0h>48h
Zbtb46	566.791	-0.945744	0.148845	-6.3539	2.09924e-10	3.71976e-09	732	645	678	390	478	376	654	812	713	0h>48h
Gm6976	29.058	-3.96896	0.62482	-6.35216	2.12314e-10	3.75917e-09	3	4	3	4	1	6	58	57	42	0h>48h
Slc1a5	720.722	-1.15222	0.181407	-6.35158	2.13118e-10	3.77046e-09	844	702	852	421	580	440	726	1022	1185	0h>48h
Cdyl2	754.826	-1.02744	0.161809	-6.34971	2.1572e-10	3.81352e-09	838	650	776	449	612	536	819	1186	969	0h>48h
Bcl6	90.4205	1.60213	0.252498	6.34513	2.22235e-10	3.92564e-09	139	169	138	134	160	142	39	51	41	48h>0h
Gdpgp1	292.396	1.09033	0.171958	6.34067	2.28762e-10	4.03779e-09	374	353	337	395	475	407	142	215	193	48h>0h
Fryl	762.167	-1.24089	0.195868	-6.33532	2.36846e-10	4.17722e-09	540	486	487	426	535	492	1076	1134	887	0h>48h
Paox	536.178	-1.31023	0.20685	-6.33421	2.38554e-10	4.20407e-09	543	451	564	290	401	302	528	781	952	0h>48h
Me1	1378.51	0.999	0.157882	6.32751	2.4915e-10	4.3874e-09	1341	1672	1979	1907	2104	1869	894	856	913	48h>0h
Slc25a12	342.374	-1.09168	0.172611	-6.32448	2.54092e-10	4.47095e-09	217	168	211	205	259	237	436	456	462	0h>48h
Tnfsf12	98.0053	-2.22925	0.352609	-6.32216	2.57938e-10	4.53511e-09	19	27	21	33	34	43	89	226	169	0h>48h
Batf	100.271	-1.69712	0.26864	-6.31746	2.65894e-10	4.67137e-09	54	42	64	52	49	50	107	164	182	0h>48h
Mmp11	313.944	1.63898	0.259524	6.31534	2.69564e-10	4.73219e-09	404	417	482	444	600	486	94	145	214	48h>0h
A930024E05Rik	41.6459	-2.68434	0.425073	-6.31502	2.70129e-10	4.73844e-09	3	1	3	13	13	10	43	90	82	0h>48h
Rdh11	460.73	-1.02674	0.162692	-6.31092	2.77377e-10	4.86181e-09	275	274	310	328	324	316	540	599	664	0h>48h
Chrdl2	79.7519	1.79632	0.284654	6.31055	2.7805e-10	4.86984e-09	105	72	82	119	142	136	25	35	45	48h>0h
Olr1	64.5904	2.63434	0.417573	6.3087	2.8139e-10	4.92454e-09	84	102	86	111	116	127	25	17	9	48h>0h
Dnajc28	203.319	1.15509	0.18312	6.30787	2.8291e-10	4.94733e-09	277	225	299	284	337	279	111	135	122	48h>0h
Samd4	380.73	-1.00552	0.159465	-6.30555	2.87179e-10	5.01812e-09	233	238	212	263	292	256	395	571	529	0h>48h
Nim1k	36.2395	-2.97496	0.471824	-6.30522	2.87779e-10	5.02471e-09	7	7	3	9	6	11	44	62	84	0h>48h
Pgk1-rs7	446.652	-1.33863	0.212388	-6.30276	2.92386e-10	5.10123e-09	284	409	481	230	271	308	459	655	776	0h>48h
Dmd	234.148	1.74158	0.276348	6.30215	2.93548e-10	5.11757e-09	277	249	312	350	420	384	129	100	79	48h>0h
Grb14	58.5262	2.45538	0.389792	6.29922	2.99153e-10	5.21128e-09	118	128	99	92	95	128	13	14	26	48h>0h
Mtr	4734.73	-0.692456	0.109942	-6.2984	3.00728e-10	5.2347e-09	4606	4107	4577	3524	4359	3734	4877	6118	6133	0h>48h
Dgkh	572.929	0.911101	0.144664	6.29805	3.01414e-10	5.24261e-09	470	495	463	744	854	796	360	410	389	48h>0h
Fstl1	2613.07	0.942176	0.149648	6.29595	3.05528e-10	5.30603e-09	2520	2922	3140	3493	3730	3753	1698	1757	1736	48h>0h
Btbd1	1672.77	-0.86267	0.137019	-6.29597	3.05487e-10	5.30603e-09	1703	1527	1822	1150	1363	1288	1987	2192	2099	0h>48h
Kdm6b	4139.87	-1.34826	0.214284	-6.29194	3.13532e-10	5.44087e-09	4794	4222	3410	2266	3296	1992	3986	7003	6648	0h>48h
Rnf14	1716.63	-1.20625	0.191777	-6.28987	3.17739e-10	5.50965e-09	1043	1030	1103	1054	1178	1089	2521	2248	2124	0h>48h
Arfgef3	405.943	1.19481	0.189973	6.28939	3.18707e-10	5.52223e-09	396	423	409	575	609	619	248	238	228	48h>0h
Eng	321.852	-1.23273	0.196045	-6.288	3.21584e-10	5.56783e-09	157	149	204	196	217	202	344	431	553	0h>48h
Ntsr1	69.5697	-1.86998	0.297402	-6.28772	3.22168e-10	5.57367e-09	24	28	23	33	39	24	100	108	110	0h>48h
Epha8	812.521	1.29175	0.205492	6.28612	3.25491e-10	5.62687e-09	1433	1226	1195	1175	1464	1073	311	501	585	48h>0h
Rora	570.812	-1.8285	0.29099	-6.28371	3.30588e-10	5.71063e-09	288	330	303	247	280	275	959	1061	544	0h>48h
Pcnt	1933.76	0.820014	0.130537	6.28187	3.34528e-10	5.77429e-09	2307	2213	2097	2491	3075	2369	1120	1525	1461	48h>0h
Saa3	423.012	1.79467	0.285749	6.2806	3.3728e-10	5.81737e-09	571	472	793	703	782	620	161	124	267	48h>0h
Shcbp1l	940.568	1.15636	0.184142	6.27969	3.39249e-10	5.84688e-09	1354	1254	1261	1325	1552	1287	549	670	475	48h>0h
Akr1cl	39.1139	7.72046	1.23	6.27677	3.45671e-10	5.95304e-09	55	84	65	79	78	91	0	1	0	48h>0h
Pla2g2d	96.7555	-1.60402	0.256048	-6.26452	3.73976e-10	6.43562e-09	71	57	69	46	59	49	105	159	166	0h>48h
Nphp4	657.285	-0.942821	0.150635	-6.25899	3.8749e-10	6.66312e-09	617	622	534	474	514	452	668	907	968	0h>48h
Prkra	230.913	-1.52342	0.243439	-6.25793	3.90133e-10	6.70349e-09	172	171	204	116	161	107	362	305	319	0h>48h
Kdm4b	634.371	-1.10105	0.175994	-6.2562	3.94482e-10	6.77309e-09	434	421	474	416	516	366	637	944	972	0h>48h
Mboat2	1087.12	-0.898596	0.143735	-6.25177	4.05824e-10	6.96256e-09	854	848	958	738	841	848	1275	1401	1445	0h>48h
Map2k6	50.6297	-2.11844	0.339052	-6.24812	4.15417e-10	7.12175e-09	19	18	21	17	24	20	60	91	92	0h>48h
Ube2ql1	82.1876	-1.88817	0.30256	-6.24064	4.3579e-10	7.46538e-09	24	9	29	40	31	40	113	114	150	0h>48h
Ptrf	3940.64	-1.18641	0.190118	-6.2404	4.36466e-10	7.47131e-09	2679	2551	3018	2473	2932	2318	3771	5528	6902	0h>48h
Gm5559	11956.8	-1.24062	0.19891	-6.23712	4.45698e-10	7.62358e-09	9859	9917	12396	6726	8186	7867	11052	17677	21119	0h>48h
Npnt	202.861	1.1819	0.189571	6.23461	4.52912e-10	7.74114e-09	299	293	304	282	329	291	110	116	136	48h>0h
Frrs1	83.3192	1.756	0.281778	6.23185	4.60971e-10	7.87296e-09	120	103	125	112	149	151	35	42	34	48h>0h
Sdc3	453.403	1.35978	0.218231	6.23089	4.63791e-10	7.91515e-09	848	815	904	636	840	626	161	282	312	48h>0h
Gdi1	1047.4	-0.85257	0.136834	-6.23067	4.64456e-10	7.92054e-09	899	850	818	753	812	820	1169	1439	1330	0h>48h
Madd	1165.21	0.913974	0.146718	6.22947	4.68028e-10	7.97547e-09	1425	1144	1223	1434	1917	1547	629	840	906	48h>0h
Parl	802.043	-1.06357	0.170771	-6.22804	4.72293e-10	8.0421e-09	664	614	725	508	606	550	794	1109	1297	0h>48h
Grem2	226.268	1.63135	0.262109	6.22395	4.84806e-10	8.24897e-09	178	234	207	333	348	408	124	102	91	48h>0h
Dhx58	149.712	-1.55597	0.250375	-6.21457	5.14646e-10	8.74359e-09	217	231	255	96	88	59	195	223	234	0h>48h
Prdm1	95.6895	-1.86264	0.29972	-6.2146	5.14561e-10	8.74359e-09	19	26	35	33	46	53	153	132	148	0h>48h
Zfp488	40.042	2.40756	0.387458	6.21375	5.17363e-10	8.78317e-09	65	52	51	63	80	73	12	11	14	48h>0h
Grap2	59.3927	-2.05866	0.332232	-6.19644	5.77552e-10	9.79764e-09	42	51	47	26	30	18	70	116	97	0h>48h
Mlxip	2843.65	0.817319	0.131967	6.19338	5.88888e-10	9.98249e-09	3634	3425	2780	3407	4614	3657	1663	2267	2113	48h>0h
Eomes	44.8173	-2.61102	0.421649	-6.1924	5.9255e-10	1.00365e-08	26	13	18	8	21	12	54	78	96	0h>48h
Srxn1	752.984	-0.944243	0.152487	-6.19229	5.92959e-10	1.00365e-08	509	429	491	505	603	543	761	1018	1136	0h>48h
Chd4	19663	-0.859051	0.138735	-6.19203	5.93927e-10	1.00454e-08	17236	15215	16439	13799	17000	14072	18850	27778	28126	0h>48h
Hps4	628.187	-1.02592	0.16576	-6.18922	6.04634e-10	1.02189e-08	550	509	433	426	465	433	619	895	971	0h>48h
Farp1	260.582	-1.11025	0.17951	-6.1849	6.21401e-10	1.04944e-08	161	190	163	174	206	150	292	369	383	0h>48h
Pde1b	173.39	1.35653	0.219535	6.17908	6.44743e-10	1.08805e-08	269	247	271	241	303	257	75	90	121	48h>0h
Ednra	61.0226	2.09182	0.338755	6.17503	6.61517e-10	1.11553e-08	92	105	109	116	100	98	25	20	22	48h>0h
Spock1	89.1198	-1.69141	0.274129	-6.17011	6.82418e-10	1.14992e-08	49	39	44	34	59	43	121	130	146	0h>48h
Tnfrsf22	323.096	-1.23384	0.200015	-6.16871	6.88493e-10	1.1593e-08	164	160	159	162	223	233	402	497	424	0h>48h
Plin2	567.015	0.927021	0.150281	6.16859	6.8901e-10	1.15931e-08	512	511	572	689	879	816	322	401	422	48h>0h
Rtel1	1467.58	-0.739625	0.119934	-6.16692	6.96317e-10	1.17073e-08	1697	1399	1424	1096	1325	1107	1506	1992	1884	0h>48h
Tpm3	3687.75	-0.89195	0.14464	-6.16671	6.97239e-10	1.17141e-08	3592	3171	3570	2477	3366	2478	4074	4673	5262	0h>48h
Prr7	312.701	1.59837	0.25928	6.16465	7.06374e-10	1.18588e-08	378	335	324	438	623	456	100	143	217	48h>0h
Sema3e	61.0972	1.85917	0.301911	6.158	7.36683e-10	1.23585e-08	88	61	94	91	113	103	24	25	28	48h>0h
Glyatl3	25.1108	-5.7184	0.929574	-6.15164	7.66881e-10	1.28556e-08	0	4	0	0	1	2	43	56	45	0h>48h
Mark1	685.219	-0.84307	0.137151	-6.14702	7.89533e-10	1.32255e-08	335	275	330	489	609	478	735	948	894	0h>48h
Zbtb7b	416.584	-1.8012	0.293235	-6.14251	8.12286e-10	1.35966e-08	252	214	327	204	224	168	334	749	859	0h>48h
Got1	509.277	-0.927064	0.150948	-6.14161	8.16884e-10	1.36635e-08	533	478	580	349	427	351	542	670	745	0h>48h
Slc25a26	312.484	1.01809	0.165851	6.13858	8.32622e-10	1.39165e-08	377	308	376	426	494	421	175	200	229	48h>0h
Lrrc38	26.1134	-3.71457	0.605335	-6.13639	8.44203e-10	1.40997e-08	10	6	0	4	7	1	33	55	56	0h>48h
Acot13	546.79	-0.961586	0.156814	-6.13202	8.67708e-10	1.44816e-08	304	279	366	344	444	403	560	768	797	0h>48h
Ckap4	1506.61	1.09131	0.178067	6.12866	8.86238e-10	1.478e-08	1766	1793	1956	2098	2444	2035	685	967	1190	48h>0h
E2f2	450.323	-1.40856	0.229838	-6.1285	8.87124e-10	1.47839e-08	527	449	521	206	332	258	432	709	800	0h>48h
Pced1b	314.58	-1.27126	0.20746	-6.12773	8.91423e-10	1.48446e-08	179	190	162	181	242	171	311	482	523	0h>48h
Fyn	2472.98	-0.959126	0.156575	-6.12567	9.03043e-10	1.50271e-08	1558	1437	1457	1638	2147	1622	2433	3444	3750	0h>48h
Idi1	2924.81	-1.74539	0.284982	-6.12455	9.09381e-10	1.51215e-08	1022	1141	1417	1262	1468	1565	5276	4700	2884	0h>48h
Mrc1	29.3291	-5.18505	0.847043	-6.12136	9.27825e-10	1.54169e-08	0	1	5	0	1	4	63	71	30	0h>48h
Strip1	1381.07	-0.929043	0.151791	-6.12054	9.32607e-10	1.5485e-08	1319	1228	1435	881	1247	938	1410	1949	1967	0h>48h
Kirrel2	41.5927	-2.62577	0.42955	-6.11284	9.78731e-10	1.62389e-08	37	30	42	15	12	10	60	56	93	0h>48h
Wars2	129.526	1.56596	0.25627	6.11059	9.92642e-10	1.64577e-08	92	105	114	209	190	217	52	82	58	48h>0h
Uncx	277.414	-1.78096	0.291471	-6.11024	9.94802e-10	1.64814e-08	115	137	136	113	161	129	228	504	556	0h>48h
Slc9a6	1449.98	0.868537	0.14217	6.10916	1.00158e-09	1.65816e-08	1832	1636	1845	1850	2203	1952	970	1031	979	48h>0h
Trib2	237.617	-1.48891	0.244126	-6.09896	1.06762e-09	1.7662e-08	198	161	178	114	137	148	343	280	390	0h>48h
Tbc1d14	1915.54	-0.753501	0.12356	-6.09827	1.07223e-09	1.77255e-08	1793	1608	1737	1350	1723	1506	2031	2447	2556	0h>48h
AI413582	455.48	-1.57993	0.259125	-6.09715	1.07976e-09	1.78369e-08	239	211	266	235	276	222	385	771	884	0h>48h
Etf1	3522.71	-1.01631	0.166839	-6.09153	1.11838e-09	1.84444e-08	1783	2099	2249	2342	2571	2536	4615	4896	4143	0h>48h
Cnih3	32.8964	-2.9567	0.485372	-6.09161	1.11781e-09	1.84444e-08	12	9	17	7	7	10	37	59	77	0h>48h
Setd1b	465.272	-1.13694	0.186645	-6.09144	1.11897e-09	1.84444e-08	359	334	243	281	368	287	447	729	717	0h>48h
Palm	644.437	1.21242	0.199111	6.08916	1.13506e-09	1.86959e-08	1112	1072	1081	928	1114	851	263	405	482	48h>0h
5930412G12Rik	83.9103	-1.65085	0.271309	-6.08477	1.16658e-09	1.92012e-08	43	28	41	43	47	40	92	152	132	0h>48h
Pigq	995.789	-0.956913	0.157284	-6.08398	1.17233e-09	1.92818e-08	1176	1014	1117	632	789	750	980	1438	1457	0h>48h
Tbc1d8	587.62	-0.989634	0.162721	-6.0818	1.18839e-09	1.95318e-08	269	230	298	394	519	355	678	798	807	0h>48h
2900041M22Rik	84.4412	-1.72132	0.283062	-6.08109	1.1937e-09	1.96049e-08	53	61	43	46	46	34	92	148	143	0h>48h
Synpo2	167.557	1.562	0.256937	6.0793	1.20712e-09	1.98109e-08	172	193	167	249	277	275	54	83	114	48h>0h
Fgd3	238.557	1.18702	0.195412	6.07444	1.24424e-09	2.04053e-08	252	181	249	306	425	337	109	171	149	48h>0h
Dlx4	228.634	-1.17009	0.192686	-6.07252	1.2592e-09	2.06357e-08	250	166	215	138	183	132	250	323	357	0h>48h
S1pr1	24.9435	4.52669	0.745743	6.07004	1.27882e-09	2.09422e-08	23	45	56	65	51	36	3	2	1	48h>0h
Cdk5r2	94.1715	-2.05638	0.338838	-6.06893	1.28765e-09	2.10716e-08	97	55	45	42	42	33	87	158	208	0h>48h
Ptpn21	309.474	1.00322	0.165322	6.06831	1.29265e-09	2.11381e-08	364	339	342	388	518	422	174	221	208	48h>0h
Hhex	659.95	-0.929561	0.153233	-6.06634	1.30857e-09	2.13831e-08	430	416	470	434	557	469	654	961	935	0h>48h
Has2	33.4934	7.49394	1.23564	6.06484	1.32086e-09	2.15683e-08	79	80	90	68	67	77	1	0	0	48h>0h
Cct6a	11114.8	-0.717695	0.118357	-6.06382	1.32928e-09	2.16902e-08	10112	9122	11037	8117	10475	8430	11914	13951	14515	0h>48h
Igsf10	99.5152	2.10926	0.348062	6.06003	1.36095e-09	2.2191e-08	64	76	54	165	174	176	47	38	22	48h>0h
Tdrd5	2367.76	-0.79959	0.13195	-6.0598	1.36287e-09	2.22064e-08	1846	1742	1857	1705	2014	1817	2785	3009	2949	0h>48h
Tspan31	413.45	-0.976983	0.161247	-6.05894	1.3702e-09	2.23098e-08	310	261	356	280	314	297	496	523	577	0h>48h
Cdc42bpb	2632.19	0.873121	0.144195	6.05516	1.40281e-09	2.28244e-08	2833	2535	2409	3233	4252	3465	1425	1931	2114	48h>0h
Fgf10	35.4603	3.0472	0.50329	6.05456	1.40805e-09	2.28932e-08	13	13	19	79	58	63	10	8	4	48h>0h
Khdrbs2	103.637	1.53099	0.252929	6.05303	1.42147e-09	2.30948e-08	95	74	105	130	197	169	45	56	55	48h>0h
Rbm11	63.2435	1.95724	0.323364	6.05274	1.42406e-09	2.31203e-08	114	82	109	92	109	120	27	23	25	48h>0h
Cct2	17663.3	-0.790932	0.130714	-6.05086	1.44072e-09	2.3374e-08	14250	13093	15719	12597	15812	13146	18719	21646	25133	0h>48h
Tpst2	1204.08	-1.01748	0.168215	-6.04869	1.4603e-09	2.36749e-08	800	733	866	732	1020	812	1210	1641	1897	0h>48h
Kdm2b	4713.02	-0.840035	0.138947	-6.04574	1.48722e-09	2.40941e-08	4252	3788	3882	3327	4196	3334	5216	5716	6724	0h>48h
Fkbp7	53.8788	2.12841	0.352089	6.0451	1.4932e-09	2.41736e-08	57	48	64	97	108	76	22	18	18	48h>0h
Txnrd1	4823.52	-0.886429	0.146669	-6.04372	1.50598e-09	2.43632e-08	3400	3030	3353	3356	4283	3254	4825	6419	7170	0h>48h
Arhgef16	266.922	-1.04891	0.173655	-6.0402	1.53927e-09	2.4884e-08	327	281	294	169	206	183	284	371	402	0h>48h
Arid5b	62.3353	2.02625	0.335502	6.03946	1.54628e-09	2.49794e-08	80	81	62	119	97	102	20	31	21	48h>0h
Col8a2	95.3132	1.91127	0.316739	6.0342	1.59751e-09	2.57887e-08	75	99	126	144	214	130	23	45	51	48h>0h
Ccdc42	19.3199	7.67345	1.27176	6.03371	1.60238e-09	2.5849e-08	63	51	58	35	54	36	0	0	0	48h>0h
Pde8a	440.508	-1.08933	0.180578	-6.03247	1.61477e-09	2.60303e-08	356	415	332	255	375	278	564	597	580	0h>48h
Foxa1	29.6239	2.87445	0.476799	6.02863	1.65356e-09	2.66367e-08	23	21	17	50	66	52	4	8	9	48h>0h
Tmem86a	402.37	1.29832	0.215385	6.0279	1.66108e-09	2.67388e-08	639	585	713	606	731	504	159	242	287	48h>0h
Calm1	5163.66	-0.709725	0.117763	-6.02673	1.67307e-09	2.69126e-08	4466	4137	5426	3766	4642	4159	5676	6506	6506	0h>48h
Gm13241	186.348	1.33286	0.22121	6.02533	1.68762e-09	2.71276e-08	223	128	174	281	257	310	88	116	106	48h>0h
Srpx2	37.4319	3.26776	0.542461	6.02397	1.70193e-09	2.73382e-08	46	56	37	68	57	90	2	7	12	48h>0h
Gipc3	43.9557	-2.33059	0.386923	-6.02341	1.70783e-09	2.74135e-08	8	6	7	13	19	15	47	85	86	0h>48h
Antxr1	263.303	1.4648	0.243201	6.023	1.71217e-09	2.74637e-08	248	319	275	384	423	427	157	130	115	48h>0h
Nfya	1946.55	-0.816808	0.135648	-6.02151	1.72801e-09	2.76982e-08	1635	1491	1715	1393	1778	1363	1951	2669	2679	0h>48h
Timp1	559.649	1.53208	0.254455	6.02102	1.73316e-09	2.77612e-08	854	833	1154	913	811	920	187	268	397	48h>0h
Gm9531	421.232	-1.14355	0.190038	-6.01747	1.77161e-09	2.8357e-08	403	370	338	277	296	267	424	579	707	0h>48h
Gm12070	6711.86	-1.16007	0.193	-6.01073	1.84692e-09	2.95417e-08	5903	5627	6876	3831	4591	4851	7160	8451	11639	0h>48h
Gramd4	1457.52	-0.770749	0.128245	-6.00995	1.85576e-09	2.9662e-08	1377	1154	1366	1092	1311	1055	1464	1965	1968	0h>48h
Raver2	735.506	-1.0485	0.174586	-6.00565	1.90572e-09	3.04392e-08	551	562	527	446	565	526	955	1044	877	0h>48h
Ttbk1	172.314	1.83161	0.305106	6.0032	1.93465e-09	3.08795e-08	175	130	124	249	351	268	38	83	105	48h>0h
Shmt2	4562.38	-0.884621	0.147423	-6.00055	1.96645e-09	3.13651e-08	3919	3799	4410	3082	4063	3170	4424	6398	6625	0h>48h
Sfxn3	104.324	1.4433	0.240688	5.99657	2.01526e-09	3.2121e-08	125	118	151	168	166	153	48	62	54	48h>0h
Gpx2	24.1419	-3.56652	0.594777	-5.9964	2.01739e-09	3.21324e-08	13	30	19	4	3	5	29	46	57	0h>48h
Ict1	620.294	-1.0618	0.177119	-5.99486	2.03663e-09	3.2416e-08	498	386	500	379	449	458	619	877	977	0h>48h
Pde8b	59.2063	1.92779	0.321582	5.99471	2.03844e-09	3.2422e-08	64	54	53	103	91	104	21	26	25	48h>0h
Camk2b	702.301	-1.1162	0.186238	-5.9934	2.05494e-09	3.26615e-08	1001	829	1032	471	546	407	677	1037	1128	0h>48h
Armt1	853.638	-0.805107	0.134407	-5.99006	2.09766e-09	3.33172e-08	576	575	628	595	780	623	936	1127	1110	0h>48h
Adcyap1r1	333.169	1.1201	0.187037	5.98867	2.11564e-09	3.35793e-08	575	475	475	459	600	412	160	233	225	48h>0h
Shisa8	66.7421	2.11767	0.353803	5.98545	2.15795e-09	3.42269e-08	226	240	235	84	159	109	22	20	31	48h>0h
Fosl1	186.319	-1.43785	0.240318	-5.98309	2.18941e-09	3.47016e-08	158	175	165	85	141	99	192	294	319	0h>48h
Plac8	119.407	1.7976	0.300505	5.98192	2.20519e-09	3.49273e-08	273	294	437	196	186	208	49	37	69	48h>0h
Gna15	72.989	-1.90632	0.318725	-5.9811	2.21631e-09	3.5079e-08	36	47	34	26	39	34	79	114	148	0h>48h
Pecr	356.32	-1.16223	0.194385	-5.979	2.24508e-09	3.55095e-08	212	175	207	200	232	271	384	534	530	0h>48h
Rnf24	1006.23	-1.00329	0.167834	-5.97789	2.26041e-09	3.57271e-08	752	659	606	637	820	694	1271	1459	1170	0h>48h
Jph1	679.246	0.879517	0.14714	5.97741	2.26709e-09	3.58077e-08	1085	833	955	884	1119	828	409	508	482	48h>0h
Crtc3	403.101	1.0135	0.169576	5.97668	2.2773e-09	3.59439e-08	458	460	360	526	668	539	211	318	256	48h>0h
Sept8	368.231	1.04335	0.17459	5.976	2.2869e-09	3.60704e-08	563	589	592	451	602	539	222	229	249	48h>0h
Clstn1	10160.5	-0.996357	0.166758	-5.97485	2.30295e-09	3.62983e-08	7347	6632	7051	6567	8743	6538	9817	14136	16001	0h>48h
March8	2735.77	0.742646	0.124301	5.97456	2.30708e-09	3.63175e-08	3496	3207	3342	3319	4185	3495	1739	2270	1980	48h>0h
Fam172a	427.545	1.01007	0.169062	5.97454	2.30737e-09	3.63175e-08	552	487	595	518	718	602	248	316	265	48h>0h
Gpr153	206.404	1.30948	0.219306	5.97105	2.35737e-09	3.70787e-08	403	492	465	322	298	317	84	128	138	48h>0h
Pou2f2	237.801	1.58707	0.26582	5.97047	2.36577e-09	3.71851e-08	241	216	233	379	339	416	80	164	108	48h>0h
Jmy	1879.91	1.09862	0.184055	5.96901	2.38701e-09	3.7493e-08	1922	1769	1843	2667	2954	2583	1210	1253	996	48h>0h
Ptpn6	164.907	-1.39451	0.233716	-5.96668	2.42132e-09	3.80055e-08	172	159	182	81	119	93	170	249	287	0h>48h
Unc5a	461.66	-1.23802	0.207524	-5.96567	2.43631e-09	3.82144e-08	855	652	603	278	327	277	420	744	762	0h>48h
Marc2	633.489	-1.06257	0.17818	-5.96348	2.46928e-09	3.87047e-08	510	457	495	408	523	389	629	886	1012	0h>48h
Ankrd13b	251.927	1.18258	0.198317	5.96308	2.4752e-09	3.87707e-08	308	298	318	372	436	316	118	156	179	48h>0h
Klhl13	680.24	1.11355	0.186754	5.96265	2.48186e-09	3.88481e-08	818	871	881	937	1011	1023	423	459	364	48h>0h
Cpt1a	1960.38	0.781141	0.131096	5.95853	2.54524e-09	3.98128e-08	2712	2289	2573	2348	2956	2649	1136	1606	1497	48h>0h
Klf13	1522.13	-0.924931	0.155339	-5.95427	2.6123e-09	4.08336e-08	1301	1121	1180	1031	1383	971	1545	2200	2122	0h>48h
Ap3b2	29.6394	-2.79509	0.469478	-5.95361	2.62299e-09	4.09725e-08	16	17	19	6	10	8	46	45	60	0h>48h
Gm14226	31.8943	7.42547	1.24728	5.95333	2.62748e-09	4.10144e-08	15	27	28	51	69	83	0	0	1	48h>0h
Gys1	752.845	-0.939527	0.15784	-5.95242	2.64203e-09	4.12131e-08	974	923	1077	508	645	506	754	1025	1134	0h>48h
Tmem176b	352.324	1.05606	0.177528	5.94872	2.70248e-09	4.21271e-08	472	328	479	485	506	527	203	215	249	48h>0h
Pygm	486.2	-1.14181	0.192012	-5.94656	2.73831e-09	4.26564e-08	311	356	301	317	356	299	481	669	825	0h>48h
Slco4a1	43.4057	-2.15003	0.361588	-5.94608	2.74643e-09	4.27534e-08	34	40	40	15	16	20	56	76	76	0h>48h
Tada3	701.521	-0.956819	0.16094	-5.94519	2.76139e-09	4.29569e-08	557	531	522	462	597	475	703	955	1068	0h>48h
Tubb5	15232.3	-0.94655	0.159228	-5.94462	2.77093e-09	4.30757e-08	10544	9742	11869	9960	11948	11424	15260	19709	24050	0h>48h
Guca1a	81.1951	-1.84241	0.310028	-5.94272	2.80323e-09	4.3548e-08	54	64	99	37	45	32	79	152	147	0h>48h
Zfp398	148.557	1.29515	0.217993	5.94127	2.82829e-09	4.39072e-08	183	168	143	221	230	223	77	98	76	48h>0h
Cped1	42.7147	3.10606	0.523119	5.93759	2.89246e-09	4.48727e-08	41	44	46	98	67	77	8	15	3	48h>0h
Gm14760	7042.09	-1.13226	0.190747	-5.93593	2.9219e-09	4.52985e-08	5950	5851	7204	4149	4860	5099	6954	9473	12120	0h>48h
Glis2	1131.83	0.991766	0.167087	5.93563	2.92719e-09	4.53494e-08	1441	1433	1108	1420	2001	1438	564	838	831	48h>0h
Mkrn1	1808.69	-1.16117	0.19567	-5.93432	2.95064e-09	4.56815e-08	1400	1276	1474	1119	1413	1063	1737	2492	3163	0h>48h
Kctd14	22.4783	4.6555	0.784614	5.93349	2.96556e-09	4.58812e-08	118	147	260	32	61	47	2	1	2	48h>0h
Gm364	1585.55	-0.77984	0.131478	-5.93135	3.00458e-09	4.64532e-08	1174	1123	1447	1128	1369	1244	1801	2120	1919	0h>48h
Sox11	1226.32	-0.965497	0.162909	-5.92662	3.0924e-09	4.77784e-08	1199	948	1159	842	1021	804	1527	1757	1429	0h>48h
Adgrb1	114.489	-1.45149	0.245015	-5.9241	3.14021e-09	4.84841e-08	150	105	107	72	67	57	125	184	185	0h>48h
Dhh	25.6786	5.61976	0.949224	5.92037	3.21212e-09	4.95607e-08	15	23	19	41	79	44	1	2	0	48h>0h
Chd3os	1786.26	0.81113	0.137018	5.91986	3.22207e-09	4.96803e-08	2360	1954	2352	2380	2765	2157	1141	1408	1237	48h>0h
Inppl1	3276.25	-1.05512	0.17827	-5.9187	3.24497e-09	4.99994e-08	3438	3102	3277	2160	2727	1964	3069	4992	5035	0h>48h
Trnp1	418.292	1.7971	0.303642	5.9185	3.24892e-09	5.00263e-08	775	649	764	634	824	633	97	180	282	48h>0h
Rhoj	67.0706	2.34259	0.396084	5.91438	3.33133e-09	5.12605e-08	76	101	72	121	98	136	15	16	34	48h>0h
Bean1	71.7616	-1.92782	0.326095	-5.91184	3.38297e-09	5.20198e-08	48	33	39	27	48	22	92	128	114	0h>48h
Slc24a3	22.6712	4.38053	0.741442	5.90812	3.4603e-09	5.31729e-08	21	31	14	42	39	56	3	1	2	48h>0h
Gm41	1001.35	0.851598	0.144197	5.90579	3.50969e-09	5.38953e-08	1220	1103	1417	1241	1583	1316	584	827	684	48h>0h
Neurl1b	819.24	-0.969359	0.164178	-5.90431	3.54117e-09	5.43418e-08	971	897	893	485	709	590	848	1130	1210	0h>48h
Lacc1	268.637	1.06581	0.180526	5.90393	3.54946e-09	5.44302e-08	313	307	332	398	394	369	137	196	177	48h>0h
Gm25287	19.8333	7.70725	1.30547	5.90382	3.55172e-09	5.44302e-08	9	21	29	37	29	59	0	0	0	48h>0h
Hspa5	8413.4	-0.670478	0.113676	-5.89812	3.67656e-09	5.63052e-08	7341	6959	8595	6346	7382	7055	8671	10789	10785	0h>48h
Bicc1	616.548	-0.835087	0.141635	-5.89607	3.72265e-09	5.69727e-08	502	475	477	431	522	467	676	873	762	0h>48h
RP24-544J6.4	52.9251	-2.5446	0.43161	-5.89561	3.73293e-09	5.70914e-08	28	21	24	13	10	26	67	91	108	0h>48h
Nnat	459.803	-1.51289	0.256722	-5.89311	3.78989e-09	5.79235e-08	326	334	398	234	286	246	380	815	842	0h>48h
Nmb	137.884	-1.47091	0.249704	-5.8906	3.84808e-09	5.87732e-08	142	114	139	66	89	80	142	205	252	0h>48h
Zap70	96.0946	-1.47665	0.250788	-5.88802	3.90839e-09	5.96542e-08	67	73	66	58	53	51	125	137	150	0h>48h
Gm13387	27.2657	-3.11276	0.528819	-5.88625	3.95061e-09	6.02581e-08	12	5	3	9	5	4	37	61	46	0h>48h
Pkn3	261.076	-1.564	0.265883	-5.88229	4.04634e-09	6.16588e-08	189	194	194	133	170	122	226	451	488	0h>48h
Gm26917	14110.3	1.80747	0.307276	5.88222	4.04788e-09	6.16588e-08	9523	10179	10942	28810	20256	20440	3364	6499	8904	48h>0h
Neo1	2360.56	0.716309	0.121788	5.88161	4.06284e-09	6.18451e-08	2451	2384	2324	2763	3576	3087	1519	1910	1796	48h>0h
6330403A02Rik	22.4374	-3.33288	0.566703	-5.88118	4.07359e-09	6.19672e-08	19	14	4	5	5	3	32	44	44	0h>48h
Efr3b	863.439	-0.893852	0.152029	-5.87949	4.11523e-09	6.25586e-08	1079	937	973	609	762	572	864	1267	1174	0h>48h
Dnm3os	24.8654	3.73417	0.635232	5.87844	4.14151e-09	6.29161e-08	37	44	40	59	41	46	5	3	2	48h>0h
Baz2a	9132.22	-0.775575	0.132025	-5.87447	4.24197e-09	6.43989e-08	8298	7864	6850	6428	8684	6577	9494	12778	11529	0h>48h
Metrnl	328.574	-1.17924	0.200768	-5.87362	4.26368e-09	6.46853e-08	249	257	315	210	242	194	322	472	553	0h>48h
Gm12216	38.705	2.32214	0.395399	5.8729	4.28237e-09	6.49254e-08	57	54	67	60	75	72	9	17	12	48h>0h
Gm2115	110.722	2.08905	0.355718	5.87277	4.28575e-09	6.49333e-08	78	84	65	143	206	225	54	36	30	48h>0h
Gpr146	92.0122	1.46306	0.249169	5.87175	4.31207e-09	6.52884e-08	130	113	140	138	162	133	43	46	54	48h>0h
Gnas	1024.97	-1.46433	0.24949	-5.86928	4.37692e-09	6.62261e-08	427	435	478	547	689	518	851	1718	1928	0h>48h
Id3	1847.62	0.977268	0.166563	5.86726	4.43056e-09	6.69931e-08	1195	1163	1308	2419	3082	2380	903	1293	1477	48h>0h
Fam204a	813.445	-1.16017	0.197806	-5.86519	4.48631e-09	6.77908e-08	490	438	496	519	646	453	1027	1320	928	0h>48h
Mchr1	95.3328	-1.48463	0.253254	-5.86223	4.56704e-09	6.89647e-08	81	48	41	50	59	52	108	139	166	0h>48h
Pard3	726.133	-0.871746	0.148713	-5.86195	4.57454e-09	6.89938e-08	495	453	521	460	628	561	769	990	994	0h>48h
Hacd3	1857.54	-0.77371	0.131989	-5.86193	4.57505e-09	6.89938e-08	1570	1511	1613	1318	1618	1460	2071	2269	2494	0h>48h
Il1rl2	25.9755	2.98704	0.509769	5.8596	4.63995e-09	6.99261e-08	52	25	45	50	48	49	5	6	6	48h>0h
Prok2	71.1565	2.08302	0.355938	5.85219	4.85149e-09	7.30655e-08	73	70	81	107	164	101	33	24	21	48h>0h
Lman2l	423.276	0.928066	0.158702	5.84787	4.97908e-09	7.48548e-08	389	393	390	556	643	579	230	340	287	48h>0h
Cela1	41.158	-2.38918	0.408558	-5.84783	4.9802e-09	7.48548e-08	28	35	31	19	12	11	50	82	72	0h>48h
H1f0	1913.69	-1.16551	0.1993	-5.84802	4.97448e-09	7.48548e-08	2001	1477	2110	1192	1503	1102	1767	2803	3278	0h>48h
Dmrtc1c2	295.501	-1.42896	0.244436	-5.84594	5.03713e-09	7.56603e-08	395	359	397	159	220	138	276	492	513	0h>48h
Tspan18	390.972	-1.13828	0.194801	-5.8433	5.11771e-09	7.68199e-08	316	319	384	214	333	242	418	638	527	0h>48h
Fas	35.7659	2.40845	0.412281	5.84177	5.16486e-09	7.74763e-08	33	33	36	69	66	57	11	12	10	48h>0h
Magel2	76.0117	1.71341	0.293455	5.83873	5.26009e-09	7.88527e-08	95	90	86	106	123	143	29	35	40	48h>0h
Nrep	250.13	1.13085	0.193713	5.83779	5.28962e-09	7.9243e-08	326	362	406	321	390	388	148	165	143	48h>0h
Ddhd2	2312.82	0.959904	0.164462	5.83662	5.32703e-09	7.97507e-08	3328	2954	3065	2934	3691	3181	1529	1653	1370	48h>0h
Plxnb1	975.709	-1.05519	0.180922	-5.83228	5.46759e-09	8.1801e-08	817	758	791	600	843	602	940	1460	1494	0h>48h
Casq2	16.7523	7.46526	1.28002	5.83216	5.47143e-09	8.18045e-08	30	25	36	32	36	39	0	0	0	48h>0h
Dock1	1294.1	-1.02833	0.176428	-5.82864	5.58797e-09	8.34919e-08	1392	1293	1280	834	1001	894	1702	1859	1470	0h>48h
Piwil2	13549.5	0.769448	0.132088	5.82529	5.70136e-09	8.51301e-08	17221	15112	16351	16589	20879	17386	8159	9840	11366	48h>0h
Colgalt2	54.6432	-2.20821	0.379224	-5.82297	5.78093e-09	8.62613e-08	21	25	19	26	19	17	58	118	91	0h>48h
Map2k1	2699.44	-0.68895	0.118328	-5.82238	5.8016e-09	8.65128e-08	2435	2288	2785	2017	2506	2112	2813	3363	3570	0h>48h
Kcnq2	168.082	-1.37826	0.236756	-5.82145	5.83388e-09	8.69371e-08	238	225	200	100	114	86	163	290	267	0h>48h
Gm19680	167.691	-1.48446	0.255157	-5.81783	5.96151e-09	8.87808e-08	174	157	172	103	107	73	217	209	294	0h>48h
Glrx2	212.906	-1.30405	0.224222	-5.81587	6.03206e-09	8.97724e-08	159	93	135	138	151	105	237	373	282	0h>48h
Rhoc	1282.1	-1.35391	0.232813	-5.81543	6.04781e-09	8.99478e-08	806	707	927	710	914	696	1114	1973	2403	0h>48h
Lgr6	165.88	-1.2525	0.215448	-5.81344	6.12019e-09	9.09647e-08	89	108	101	88	127	101	174	252	263	0h>48h
Bzw2	1141.01	-0.885279	0.152347	-5.81093	6.21275e-09	9.22799e-08	1215	1153	1270	745	975	854	1274	1391	1658	0h>48h
Nrp1	106.586	2.05707	0.354302	5.80597	6.3993e-09	9.49886e-08	121	154	162	157	178	213	41	56	23	48h>0h
Gm13292	2040.16	-1.28231	0.221013	-5.80196	6.55449e-09	9.72286e-08	1690	1649	1949	1092	1290	1417	2762	2256	3354	0h>48h
Vnn1	24.4893	5.1087	0.880572	5.80157	6.56987e-09	9.7393e-08	14	15	19	48	77	30	2	0	2	48h>0h
Slc37a4	240.437	-1.29074	0.222506	-5.80094	6.59453e-09	9.76309e-08	266	228	249	138	153	155	284	293	421	0h>48h
Arap1	861.346	-1.12432	0.193816	-5.80097	6.5933e-09	9.76309e-08	838	727	849	540	697	507	830	1209	1452	0h>48h
Gria3	54.7244	3.10126	0.534668	5.80034	6.61791e-09	9.79132e-08	20	50	57	117	75	116	19	7	6	48h>0h
Fbxo17	123.187	-1.49662	0.258147	-5.79757	6.72847e-09	9.9484e-08	77	83	67	65	67	74	122	206	211	0h>48h
Bcl3	102.158	1.55302	0.268098	5.79273	6.92512e-09	1.02325e-07	435	390	412	135	211	147	38	54	61	48h>0h
Plec	5304.56	-0.8914	0.154105	-5.78438	7.27813e-09	1.07471e-07	5061	4078	4066	3695	4924	3361	5395	7412	7458	0h>48h
G3bp1	4516.73	-0.808185	0.139753	-5.78294	7.34048e-09	1.08321e-07	3323	3076	3582	3256	3960	3322	4590	5628	6653	0h>48h
Il12rb1	129.983	-1.78767	0.309306	-5.77962	7.48696e-09	1.10411e-07	74	67	60	57	74	57	111	230	262	0h>48h
9530077C05Rik	653.07	0.97677	0.169018	5.7791	7.51007e-09	1.1068e-07	786	680	813	816	1027	934	429	413	433	48h>0h
Abi3	31.0048	-2.80473	0.485475	-5.77729	7.59148e-09	1.11807e-07	13	21	23	7	11	7	48	41	69	0h>48h
Golga7b	24.1326	-3.55907	0.616208	-5.77576	7.66047e-09	1.1275e-07	7	8	12	3	2	7	29	53	50	0h>48h
Vgll4	986.057	-0.907347	0.157214	-5.77142	7.86076e-09	1.15622e-07	875	804	908	644	904	663	1007	1349	1425	0h>48h
Pcolce	999.136	0.776318	0.134541	5.7701	7.92237e-09	1.16453e-07	1240	1152	1436	1313	1387	1331	614	748	794	48h>0h
Elmsan1	706.989	-0.878264	0.152353	-5.76466	8.18249e-09	1.20199e-07	683	666	663	477	631	495	703	1019	974	0h>48h
Gm5138	2051.72	-1.24544	0.216116	-5.76285	8.27056e-09	1.21414e-07	1802	1698	1969	1156	1335	1400	2698	2239	3432	0h>48h
Myo1c	2996.77	-0.909406	0.157899	-5.75941	8.44061e-09	1.2383e-07	2770	2702	2751	2156	2438	2078	2836	4117	4592	0h>48h
Cep128	308.23	1.17523	0.204084	5.75855	8.48393e-09	1.24385e-07	443	437	455	426	496	446	185	211	153	48h>0h
Gpr142	25.9211	-4.98386	0.865594	-5.75773	8.52508e-09	1.24908e-07	0	0	0	5	0	0	28	54	68	0h>48h
Lactb	307.015	-1.20793	0.20987	-5.75562	8.63228e-09	1.26397e-07	203	184	244	173	265	162	380	472	399	0h>48h
Nphp3	194.37	-1.29564	0.225226	-5.75265	8.78572e-09	1.28478e-07	176	183	191	133	121	105	241	324	242	0h>48h
Wdr62	1231.74	0.754001	0.131068	5.75274	8.78102e-09	1.28478e-07	1400	1277	1111	1497	1847	1618	738	1034	920	48h>0h
Nfkbia	676.075	-0.884708	0.153866	-5.74985	8.9324e-09	1.30539e-07	373	365	422	492	511	514	691	905	980	0h>48h
Syt12	162.371	-1.41258	0.245766	-5.74765	9.04926e-09	1.32161e-07	145	129	152	90	120	76	178	226	291	0h>48h
Fat4	41.5994	2.87271	0.500543	5.73919	9.51326e-09	1.38848e-07	40	44	65	78	69	86	3	18	9	48h>0h
Snd1	5463.05	-0.878866	0.153303	-5.73286	9.87529e-09	1.4404e-07	4648	4297	4700	3778	4908	3699	5549	6972	8269	0h>48h
Sfn	128.682	-1.96156	0.342452	-5.72798	1.01635e-08	1.48149e-07	102	68	97	60	47	60	112	215	285	0h>48h
Cdk2ap1	2299.75	-0.894221	0.156165	-5.72611	1.02757e-08	1.49687e-07	2188	2053	2215	1551	1926	1686	2295	2938	3562	0h>48h
Mat2b	1506.94	0.674572	0.117838	5.72458	1.0369e-08	1.50949e-07	1760	1483	1936	1869	2208	1865	1006	1203	1182	48h>0h
Ncf2	88.7769	-1.52532	0.266624	-5.72086	1.05985e-08	1.54191e-07	45	41	63	45	45	56	104	148	135	0h>48h
Hoxc6	28.703	3.18472	0.556828	5.7194	1.06902e-08	1.55426e-07	37	41	49	59	52	54	1	7	9	48h>0h
1110032F04Rik	119.491	-1.32873	0.232388	-5.71772	1.07966e-08	1.56872e-07	102	72	101	63	78	77	143	163	194	0h>48h
Dhcr7	3896.74	-0.881607	0.154208	-5.717	1.08424e-08	1.57437e-07	2325	2066	2271	2638	3298	2864	3889	4949	6016	0h>48h
Map4k1	491.006	-1.19241	0.208755	-5.71198	1.1167e-08	1.62046e-07	507	406	491	305	356	298	439	793	798	0h>48h
Slc8a2	127.14	1.76362	0.309075	5.70613	1.15574e-08	1.67604e-07	226	227	222	192	285	160	34	63	75	48h>0h
Ndfip1	1467.97	-0.793004	0.138977	-5.706	1.15662e-08	1.67625e-07	1093	1107	1173	1014	1256	1174	1574	1819	2050	0h>48h
Rasal3	101.543	-1.35689	0.237941	-5.70266	1.17951e-08	1.70833e-07	178	153	164	59	60	63	128	146	152	0h>48h
Uhrf1bp1	3033.83	0.720266	0.126313	5.70224	1.18241e-08	1.71139e-07	4456	3680	3761	3676	4729	3736	1828	2471	2431	48h>0h
Stx3	363.643	-1.04028	0.182436	-5.70214	1.18313e-08	1.71139e-07	248	229	263	213	313	241	401	569	466	0h>48h
Tbc1d4	286.011	-1.09964	0.192923	-5.69988	1.19893e-08	1.73314e-07	258	183	209	202	209	171	375	393	363	0h>48h
Fam109a	928.258	-1.50868	0.264697	-5.69964	1.20058e-08	1.73442e-07	579	543	491	482	602	468	748	1523	1840	0h>48h
Mpp1	241.065	1.02436	0.179763	5.69841	1.20931e-08	1.74592e-07	241	194	256	326	368	341	122	166	179	48h>0h
Tbx2	40.955	2.16982	0.380944	5.6959	1.22719e-08	1.77061e-07	72	55	80	70	78	67	9	16	19	48h>0h
Tfap2a	127.982	-1.3191	0.231853	-5.68937	1.2751e-08	1.83856e-07	50	46	41	74	99	63	155	201	179	0h>48h
Plxna2	73.0166	1.56414	0.275005	5.68768	1.28775e-08	1.85562e-07	151	123	109	106	121	122	31	41	36	48h>0h
Hlf	461.734	-0.98203	0.172665	-5.68749	1.28918e-08	1.8565e-07	361	264	291	349	367	278	556	619	610	0h>48h
Nanos3	215.176	-1.09746	0.193031	-5.68543	1.30487e-08	1.8779e-07	177	149	193	150	159	130	232	296	333	0h>48h
E2f1	3568.22	-1.16962	0.206052	-5.67634	1.3761e-08	1.97887e-07	3030	2868	3197	2160	2748	2153	3111	5539	6044	0h>48h
Gm4735	3546.05	-1.34607	0.23714	-5.67625	1.37677e-08	1.97887e-07	3040	2630	3666	2005	2236	2162	3444	4448	7166	0h>48h
Pknox2	32.753	2.70439	0.476476	5.67583	1.38019e-08	1.98253e-07	40	54	46	61	63	58	3	13	10	48h>0h
Atp5c1	3237.8	-0.784993	0.13833	-5.67477	1.38874e-08	1.99355e-07	2891	2596	3149	2248	2858	2527	3211	4181	4648	0h>48h
Ctso	102.302	1.65617	0.292379	5.66446	1.4749e-08	2.11589e-07	111	116	153	136	170	190	54	44	44	48h>0h
Btbd2	618.137	-1.19074	0.210254	-5.66333	1.48465e-08	2.12853e-07	760	690	743	366	487	360	575	899	1074	0h>48h
3010003L21Rik	84.8538	1.60987	0.284316	5.66226	1.49389e-08	2.14043e-07	139	159	95	134	157	120	27	54	43	48h>0h
Rpap3	1272.3	-0.870694	0.153789	-5.6616	1.49965e-08	2.14731e-07	881	807	847	852	1157	887	1517	1740	1529	0h>48h
Bank1	55.2738	-2.64412	0.46704	-5.66143	1.50112e-08	2.14808e-07	45	45	48	23	11	14	118	81	71	0h>48h
Scap	3603.14	1.03714	0.183201	5.66121	1.50307e-08	2.1495e-07	4786	4058	4581	4554	6046	4981	1667	2367	2942	48h>0h
Wdr86	154.59	-1.49867	0.26484	-5.65877	1.52459e-08	2.1789e-07	116	108	112	78	111	72	156	227	293	0h>48h
Gpx1	2047.61	-0.967813	0.171039	-5.65844	1.52758e-08	2.18181e-07	1711	1633	1974	1381	1496	1548	1956	2843	3201	0h>48h
Cnksr1	119.835	-1.42591	0.252031	-5.65768	1.53432e-08	2.18867e-07	87	68	74	70	71	67	119	191	207	0h>48h
Pgam1-ps2	1815.41	-0.980582	0.173318	-5.65769	1.53421e-08	2.18867e-07	1657	1671	1598	1103	1470	1348	1915	2255	2900	0h>48h
Cfap20	1266.11	-0.805465	0.142407	-5.65607	1.54878e-08	2.20791e-07	1189	1023	1219	857	1159	948	1411	1565	1723	0h>48h
Vamp3	3238.81	-0.739047	0.130687	-5.65511	1.55743e-08	2.21746e-07	3312	3061	3574	2368	2988	2440	3672	3941	4177	0h>48h
Fgf2	87.2036	2.03985	0.360704	5.6552	1.55668e-08	2.21746e-07	89	95	116	141	143	162	45	28	24	48h>0h
Igtp	273.161	1.09602	0.193815	5.655	1.55848e-08	2.21756e-07	567	490	597	395	416	379	141	160	209	48h>0h
Fzd7	1538.08	-0.788847	0.13963	-5.64956	1.6086e-08	2.28744e-07	1021	959	1004	1098	1339	1180	1600	1894	2213	0h>48h
Clip4	270.463	-1.07454	0.190337	-5.64545	1.64751e-08	2.34013e-07	189	159	207	178	207	173	349	391	325	0h>48h
Ptgr1	501.978	-0.903443	0.160031	-5.64543	1.64772e-08	2.34013e-07	544	439	651	366	411	344	504	675	745	0h>48h
Mmp16	36.0992	2.34189	0.414882	5.64471	1.65464e-08	2.34849e-07	24	27	43	63	59	70	8	13	14	48h>0h
Slc22a17	426.538	0.911284	0.16149	5.64296	1.67148e-08	2.37091e-07	626	481	586	546	670	572	222	319	331	48h>0h
Fam101a	61.6794	-1.86426	0.330485	-5.64098	1.69082e-08	2.39684e-07	64	46	55	34	29	22	68	106	112	0h>48h
Hdgfl1	163.7	-1.39989	0.248227	-5.63957	1.70471e-08	2.41503e-07	217	145	225	80	99	109	177	225	297	0h>48h
Dnpep	1251.88	-0.888745	0.157682	-5.63631	1.73736e-08	2.45974e-07	1283	1122	1412	836	1027	952	1219	1676	1894	0h>48h
Gm20899	2569.4	-1.2603	0.223609	-5.63617	1.7387e-08	2.46011e-07	2074	2093	2525	1373	1660	1806	3459	2801	4237	0h>48h
Cdk1	1287.08	-0.729092	0.129363	-5.63601	1.74032e-08	2.46087e-07	885	837	1034	943	1213	958	1342	1647	1711	0h>48h
Arhgap33os	28.7205	-2.66049	0.472533	-5.63027	1.79924e-08	2.54259e-07	16	13	14	10	7	8	38	62	46	0h>48h
T	18.9426	-4.25876	0.756462	-5.62984	1.80374e-08	2.54736e-07	3	0	3	2	1	3	23	45	39	0h>48h
Gm4070	54.628	4.20265	0.746764	5.62781	1.82508e-08	2.5759e-07	19	22	54	139	25	155	8	5	3	48h>0h
Prdx1	14864.7	-0.774332	0.137696	-5.62348	1.87151e-08	2.63978e-07	11994	11688	13865	10015	12492	12621	16164	19445	19204	0h>48h
Pabpc1l	102.1	-1.7282	0.307342	-5.62305	1.87619e-08	2.64474e-07	56	61	46	38	75	41	111	165	188	0h>48h
Phldb1	2802.88	-1.17375	0.208762	-5.62244	1.88278e-08	2.65238e-07	1850	1810	1882	1605	2304	1647	2492	4462	4591	0h>48h
Sema4d	4417.31	-0.768426	0.136676	-5.62224	1.88502e-08	2.65389e-07	4223	4000	3661	3058	4163	3298	4431	5760	6153	0h>48h
Il6st	2657.68	0.761136	0.135387	5.62191	1.88862e-08	2.65731e-07	3016	2731	3108	3350	3866	3490	1773	2164	1813	48h>0h
Robo2	22.424	3.19092	0.567814	5.61965	1.91345e-08	2.69057e-07	31	17	25	40	42	47	3	5	5	48h>0h
Abhd3	218.345	-1.37328	0.244375	-5.61954	1.91465e-08	2.69059e-07	140	164	171	117	129	142	329	322	257	0h>48h
Gstp2	199.654	-1.10752	0.197088	-5.6194	1.91626e-08	2.69119e-07	84	144	248	136	147	122	256	261	275	0h>48h
BC029722	139.067	1.19963	0.213611	5.61594	1.95491e-08	2.74378e-07	189	204	228	189	223	209	64	89	95	48h>0h
Pcolce2	72.1137	1.78918	0.318601	5.61573	1.95738e-08	2.74553e-07	57	50	69	97	136	127	19	36	41	48h>0h
Zfp503	159.97	1.68506	0.300188	5.61335	1.98444e-08	2.7802e-07	223	200	296	267	257	255	38	92	97	48h>0h
Disp2	33.8135	-2.41701	0.430584	-5.61334	1.98455e-08	2.7802e-07	26	19	15	15	11	8	50	54	62	0h>48h
Rab25	44.7749	-2.32604	0.414529	-5.6113	2.00817e-08	2.81156e-07	23	15	23	9	20	19	64	61	93	0h>48h
Mrps6	651.04	-0.767905	0.136862	-5.61079	2.01401e-08	2.818e-07	532	557	608	464	554	525	697	857	845	0h>48h
RP23-404J7.10	39.858	-3.95447	0.704858	-5.6103	2.01972e-08	2.82425e-07	2	9	3	10	0	5	36	91	98	0h>48h
Lgals9	60.2626	2.0642	0.367991	5.60938	2.03055e-08	2.83589e-07	87	84	106	113	78	116	19	22	27	48h>0h
Mtor	6990.53	0.663761	0.11833	5.60939	2.03036e-08	2.83589e-07	13304	11510	11917	8252	10536	8748	4425	5586	5847	48h>0h
Brsk2	1344.9	-0.87362	0.155751	-5.60907	2.03417e-08	2.8392e-07	1125	1005	1015	966	1115	963	1280	1828	2024	0h>48h
Hnrnpll	2234.74	-0.636539	0.113516	-5.60747	2.05307e-08	2.86381e-07	1768	1670	1925	1746	2061	1801	2370	2810	2761	0h>48h
Csrnp1	475.416	-1.12571	0.200793	-5.60633	2.06658e-08	2.87979e-07	508	418	497	291	365	304	436	712	785	0h>48h
Pfkm	384.239	-0.920168	0.164134	-5.60619	2.06833e-08	2.87979e-07	281	271	285	260	322	271	399	504	573	0h>48h
Fndc1	206.947	-1.30351	0.232509	-5.60627	2.06739e-08	2.87979e-07	137	209	165	116	172	98	253	336	273	0h>48h
Tbcel	932.032	0.860169	0.15344	5.60589	2.07186e-08	2.88294e-07	1252	975	1064	1179	1520	1168	499	753	699	48h>0h
Anxa6	590.076	0.814087	0.145236	5.60528	2.07914e-08	2.89129e-07	675	723	920	762	841	803	348	435	471	48h>0h
Slmo2	1338.79	-0.746895	0.133283	-5.60381	2.09685e-08	2.91414e-07	1296	1195	1393	987	1198	1023	1304	1888	1744	0h>48h
Vcl	1599.4	0.711302	0.127003	5.60066	2.13542e-08	2.96593e-07	1891	1749	1888	1969	2362	2038	1018	1363	1171	48h>0h
Grk1	68.7794	1.82991	0.326933	5.5972	2.17844e-08	3.02382e-07	74	69	52	99	142	105	29	38	21	48h>0h
Rtp4	49.9436	2.08802	0.373101	5.59637	2.18882e-08	3.03637e-07	156	161	155	76	99	85	13	15	28	48h>0h
Pkp3	89.7099	-1.49715	0.267541	-5.59595	2.19412e-08	3.04187e-07	108	60	131	52	62	37	111	140	137	0h>48h
Zfp663	39.5305	-2.20844	0.394671	-5.59564	2.19807e-08	3.04547e-07	21	23	18	19	16	10	51	72	68	0h>48h
Gtf2ird1	985.014	-0.706617	0.126306	-5.5945	2.2126e-08	3.06373e-07	959	808	898	720	890	791	1011	1311	1257	0h>48h
Sh3bp5	120.639	1.48732	0.26592	5.5931	2.23052e-08	3.08666e-07	151	144	200	189	210	171	53	84	49	48h>0h
Vwa5b2	173.057	-1.33514	0.238824	-5.59047	2.26461e-08	3.13193e-07	167	164	163	103	134	80	182	292	258	0h>48h
Epb4.1l3	1676.43	0.716506	0.128215	5.58834	2.29256e-08	3.16865e-07	1420	1403	1512	2164	2368	2136	1149	1292	1253	48h>0h
Hmg20b	412.205	-1.30043	0.233135	-5.57801	2.43284e-08	3.36049e-07	380	352	397	235	292	238	354	702	692	0h>48h
Lrrc16a	395.656	-0.881651	0.158145	-5.57494	2.47611e-08	3.41818e-07	370	322	350	271	338	285	398	575	536	0h>48h
Tpm3-rs7	2034.54	-0.820004	0.147096	-5.57464	2.48049e-08	3.42214e-07	1912	1853	1927	1403	1830	1497	2117	2506	2989	0h>48h
Drd5	13.5277	-7.29194	1.30877	-5.57158	2.52443e-08	3.48064e-07	0	0	0	0	0	0	23	23	33	0h>48h
Mink1	4245.53	-0.876072	0.157251	-5.57116	2.53045e-08	3.48682e-07	3073	2620	2650	2943	3834	2862	4012	6094	6120	0h>48h
Dcaf12	2122.48	-0.724755	0.130195	-5.56668	2.59636e-08	3.57547e-07	1832	1837	1869	1500	1941	1698	2120	2760	2882	0h>48h
Man2a1	1771.62	-1.38325	0.248511	-5.56615	2.60426e-08	3.58417e-07	824	782	881	982	1131	1031	2650	3024	1721	0h>48h
Scmh1	2028.9	-0.773302	0.138967	-5.56464	2.62688e-08	3.61311e-07	1391	1502	1310	1370	1936	1519	2095	2687	2723	0h>48h
Hoxb9	52.7528	2.25605	0.40544	5.56444	2.62991e-08	3.61509e-07	28	30	60	83	95	100	25	14	13	48h>0h
Herc3	1304.91	0.793267	0.142645	5.56114	2.68025e-08	3.68206e-07	1570	1478	1543	1674	1996	1640	816	1095	883	48h>0h
Ass1	373.053	1.06518	0.191617	5.5589	2.7148e-08	3.72727e-07	652	608	604	530	562	522	189	222	297	48h>0h
Wnt2b	146.916	-1.17743	0.212041	-5.55283	2.81083e-08	3.85677e-07	98	87	102	80	117	93	175	222	199	0h>48h
Fermt2	2088.49	0.686253	0.123652	5.54987	2.85887e-08	3.92031e-07	1813	1925	2142	2550	3103	2613	1409	1725	1539	48h>0h
Tmem246	309.686	0.932735	0.168155	5.54688	2.90814e-08	3.98547e-07	354	337	376	431	476	395	178	210	235	48h>0h
Cxcl1	91.3932	1.53899	0.277464	5.54664	2.91207e-08	3.98845e-07	56	66	63	134	167	135	51	40	44	48h>0h
Ifi44	25.2015	3.02205	0.544885	5.5462	2.91939e-08	3.99606e-07	31	43	70	54	41	47	6	4	6	48h>0h
Cyb5b	1584.55	-0.692312	0.124869	-5.54431	2.95115e-08	4.0371e-07	1342	1268	1367	1182	1470	1237	1692	2128	1901	0h>48h
Ngf	21.7032	3.13972	0.566493	5.54238	2.98395e-08	4.0795e-07	6	21	20	37	45	43	3	5	5	48h>0h
Mertk	239.172	-1.22195	0.220519	-5.54125	3.00317e-08	4.10331e-07	147	166	146	154	154	150	316	384	273	0h>48h
Dguok	508.16	-0.816936	0.147513	-5.53807	3.05828e-08	4.17609e-07	410	369	515	380	418	380	509	696	700	0h>48h
Serpina5	13.9605	7.2041	1.30093	5.53765	3.06551e-08	4.18345e-07	6	4	5	23	36	31	0	0	0	48h>0h
Fignl2	102.834	-1.77743	0.321095	-5.53553	3.10281e-08	4.2318e-07	62	62	83	48	64	38	97	165	212	0h>48h
Rbm47	28.8535	-2.49744	0.451463	-5.53187	3.16837e-08	4.31862e-07	15	11	10	8	13	7	44	49	50	0h>48h
Dmrtc1c1	287.029	-1.61028	0.291139	-5.53098	3.18449e-08	4.33798e-07	308	365	394	148	209	102	266	498	524	0h>48h
Igsf1	100.707	-1.47975	0.267581	-5.5301	3.20041e-08	4.35705e-07	71	81	64	45	59	66	141	137	152	0h>48h
Epdr1	35.3652	2.19213	0.396548	5.52802	3.23862e-08	4.40379e-07	20	23	21	61	70	55	12	12	13	48h>0h
Msrb3	109.238	1.58901	0.287445	5.52806	3.23796e-08	4.40379e-07	132	144	134	185	185	154	50	70	39	48h>0h
Gm13394	13539.8	-1.15659	0.209353	-5.52458	3.30277e-08	4.48833e-07	11940	11545	14820	8152	9526	9164	11887	19704	23958	0h>48h
Klf8	1221.19	1.2069	0.218776	5.51662	3.45587e-08	4.69356e-07	1374	1325	1301	1626	1933	1895	783	775	568	48h>0h
Pnpla2	671.189	-0.94343	0.171024	-5.51635	3.46107e-08	4.69782e-07	779	761	801	432	567	477	675	871	1052	0h>48h
Arhgef2	3557.61	-0.764525	0.138653	-5.51396	3.50846e-08	4.7593e-07	3340	3049	3181	2546	3289	2641	3492	4602	5071	0h>48h
Ifit3	31.8488	3.25566	0.590908	5.50959	3.59663e-08	4.87597e-07	13	24	33	59	75	51	11	4	2	48h>0h
Gabrd	21.8709	3.9346	0.714317	5.5082	3.62517e-08	4.91174e-07	46	54	53	42	41	48	0	2	6	48h>0h
Gapdh	3302.5	-1.07617	0.195391	-5.50779	3.63372e-08	4.92038e-07	2819	2851	3542	2270	2372	2150	3363	4032	5789	0h>48h
Col16a1	396.437	1.03675	0.188248	5.50735	3.64273e-08	4.92862e-07	510	655	644	527	646	539	180	278	310	48h>0h
Otud6a	108.064	-1.37649	0.249939	-5.50728	3.64415e-08	4.92862e-07	104	80	83	48	82	64	127	170	161	0h>48h
Ints12	670.12	0.756361	0.137384	5.50547	3.68193e-08	4.97675e-07	601	532	698	888	957	848	436	523	496	48h>0h
Fkbp11	150.405	-1.40093	0.254515	-5.50431	3.70607e-08	5.0064e-07	97	77	109	99	72	91	165	234	243	0h>48h
Smpdl3b	98.4907	1.57803	0.28676	5.50296	3.73467e-08	5.04203e-07	138	65	114	146	170	156	52	56	35	48h>0h
Zfhx4	27.8445	3.62773	0.659292	5.50246	3.7453e-08	5.05337e-07	13	36	22	51	37	74	5	1	6	48h>0h
Anxa7	1445.93	-0.694885	0.126301	-5.5018	3.75929e-08	5.06923e-07	830	778	887	1091	1347	1108	1426	1959	1865	0h>48h
Trim6	2338.64	-0.798617	0.145218	-5.49942	3.81047e-08	5.1352e-07	2095	2055	2039	1608	2056	1816	2807	2966	2848	0h>48h
Arl4d	272.018	-1.59844	0.290686	-5.49887	3.8224e-08	5.14821e-07	257	177	238	118	225	98	302	491	415	0h>48h
Lrrc9	218.653	1.90934	0.347466	5.49505	3.90596e-08	5.25763e-07	231	274	281	364	335	398	109	105	49	48h>0h
Gas7	468.229	-0.82384	0.149936	-5.49459	3.91617e-08	5.26824e-07	308	266	357	335	427	325	498	643	612	0h>48h
Fgd1	1900.13	-0.987908	0.179822	-5.49382	3.93332e-08	5.28819e-07	1444	1415	1189	1213	1639	1250	1820	2556	3082	0h>48h
Hspb1	200.336	1.49706	0.272662	5.49054	4.00696e-08	5.38399e-07	233	238	313	322	271	346	65	114	132	48h>0h
Dmrt3	531.731	-0.989137	0.180187	-5.4895	4.03081e-08	5.41284e-07	290	265	299	358	409	374	539	679	862	0h>48h
Fam107b	1054.17	-0.835472	0.152314	-5.48518	4.13043e-08	5.54333e-07	887	845	855	707	937	789	1274	1336	1313	0h>48h
Prkar2b	1179.18	0.726082	0.132384	5.48466	4.14267e-08	5.55647e-07	1721	1637	1938	1426	1732	1554	786	959	848	48h>0h
9530026P05Rik	20.3757	-3.17348	0.578627	-5.4845	4.14633e-08	5.55809e-07	7	6	19	5	4	4	28	43	37	0h>48h
Hecw2	288.297	1.11358	0.20307	5.48373	4.16456e-08	5.57924e-07	335	305	327	365	496	407	173	205	152	48h>0h
N6amt1	172.296	1.19829	0.218551	5.4829	4.18408e-08	5.60207e-07	178	159	192	259	246	259	99	111	94	48h>0h
Phlpp1	664.934	0.801161	0.14614	5.48215	4.20197e-08	5.6227e-07	951	853	900	824	937	941	401	497	522	48h>0h
Ephb2	1240.53	-0.926708	0.169104	-5.48011	4.25066e-08	5.68451e-07	1201	1053	1094	841	1113	801	1210	1692	1890	0h>48h
Mtus1	546.258	-1.29935	0.237185	-5.47821	4.2965e-08	5.74243e-07	342	301	318	305	358	347	816	851	572	0h>48h
Hk1	2247.39	-1.15974	0.211926	-5.47239	4.44015e-08	5.93092e-07	2229	1930	2295	1418	1655	1384	1959	3297	3974	0h>48h
Mir124a-1hg	20.771	-6.93651	1.26768	-5.47182	4.45437e-08	5.94641e-07	0	1	0	1	0	0	38	49	33	0h>48h
Zufsp	121.708	1.43812	0.262884	5.47055	4.48639e-08	5.98564e-07	69	107	111	172	189	206	67	71	52	48h>0h
Btf3l4	1183.85	-0.821425	0.150194	-5.46908	4.5238e-08	6.03201e-07	977	850	1039	900	997	843	1400	1618	1380	0h>48h
Rufy4	19.5729	-3.52959	0.645723	-5.46611	4.60023e-08	6.1303e-07	14	18	22	4	4	2	33	44	28	0h>48h
Ptprv	129.352	1.27578	0.233499	5.46373	4.66231e-08	6.20939e-07	115	90	115	163	228	198	61	91	70	48h>0h
Ttyh1	138.849	1.18806	0.217496	5.46242	4.69696e-08	6.25187e-07	191	169	221	192	227	200	64	85	100	48h>0h
[truncated: 30,294 more rows]
