# Supplementary figures and images for: Multi-Omics Approaches for Revealing the Epigenetic Regulation of Histone H3.1 during Spermatogonial Stem Cell Differentiation In Vitro
Source: MDPI journal article supplement (doi:10.3390/ijms24043314), 2023-02-07

Figure S1

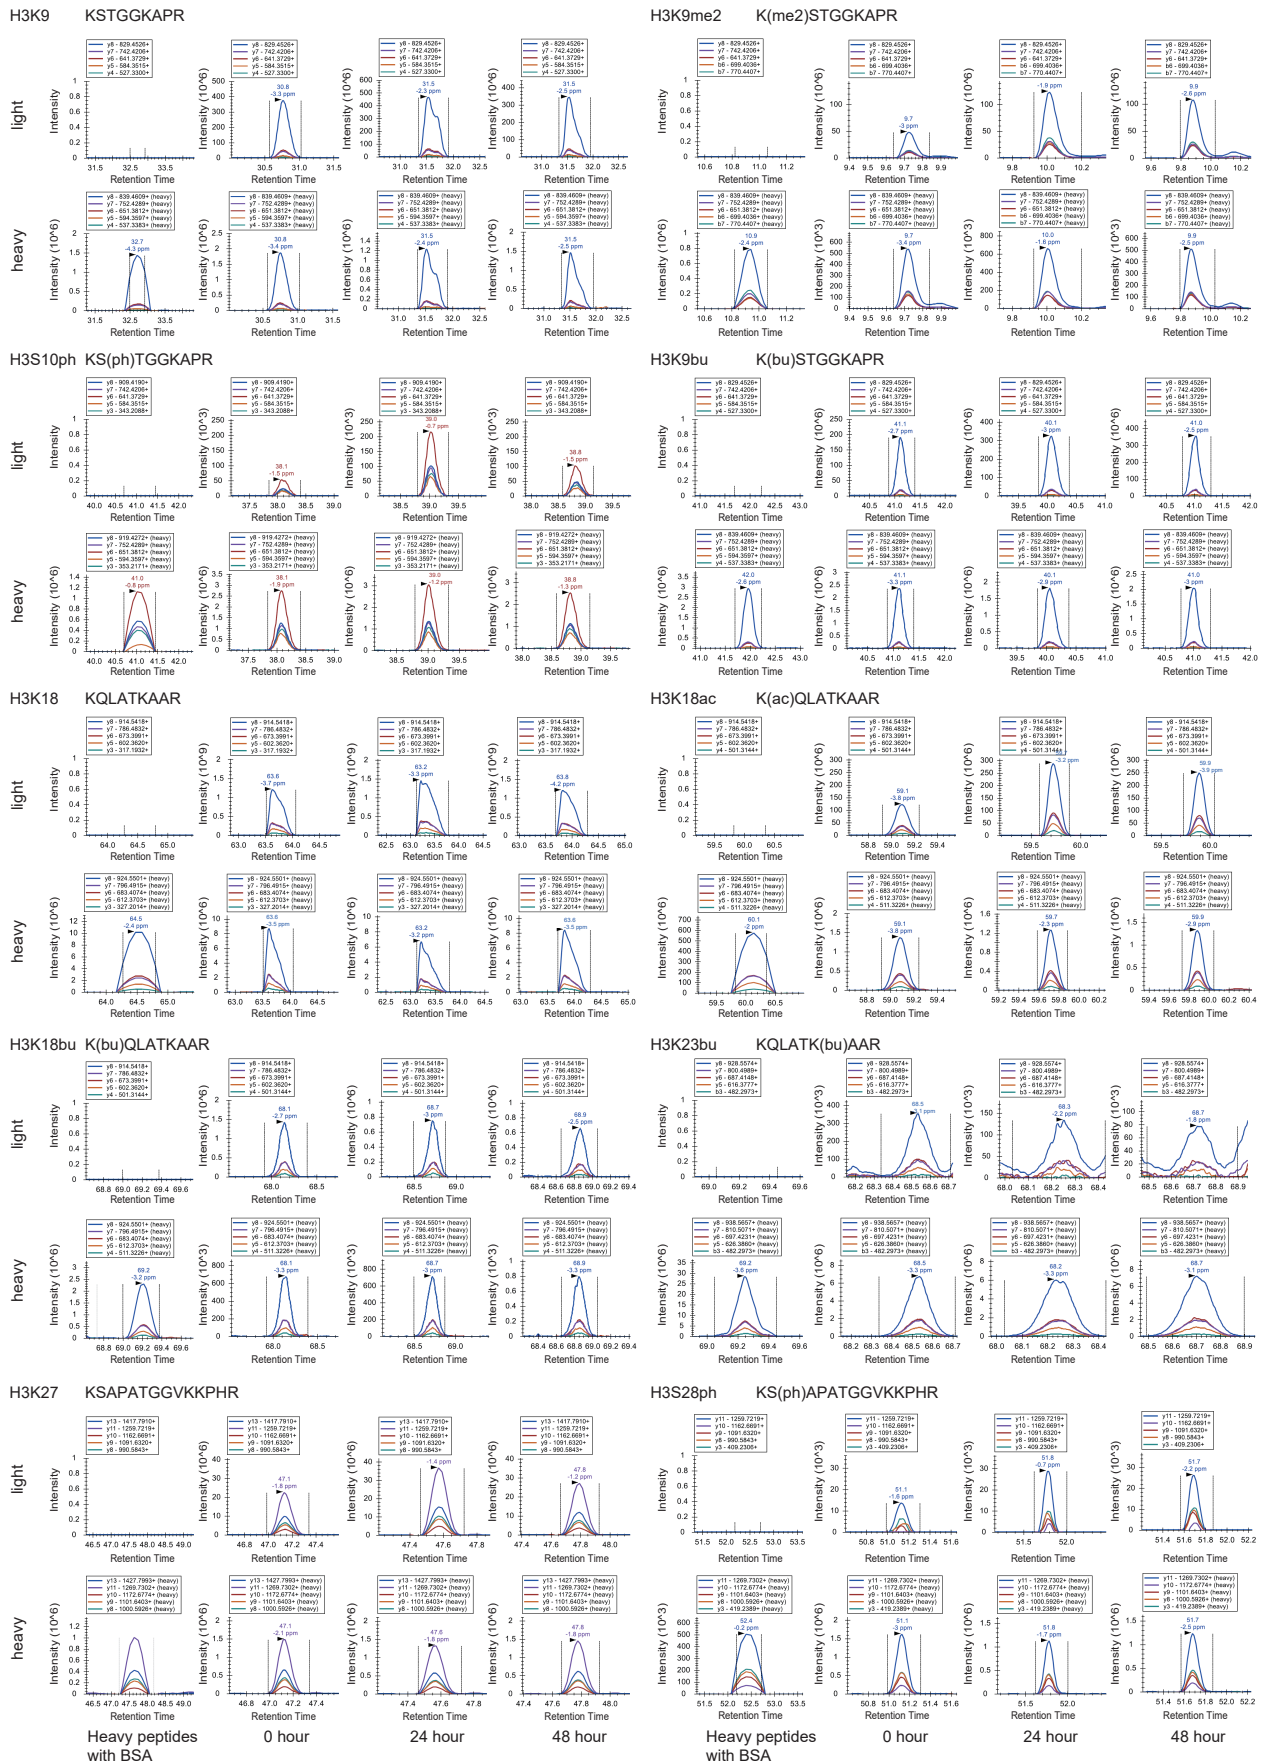

Supplement: s1 [file s1]
